# Supplementary material for: Polygenic prediction of educational attainment within and between families from genome-wide association analyses in 3 million individuals
Source: Springer Nature journal article supplement (doi:10.1038/s41588-022-01016-z), 2022-03-31
Supplement: MOESM4 [file 41588_2022_1016_MOESM4_ESM.pdf]

**Supplementary Table 1. Association results for the 3,952 independent SNPs that reached genome-wide significance**

| SNP        | Chr | BP          | Effect allele | Other allele | Effect allele frequency | Effect size | S.E.   |
|------------|-----|-------------|---------------|--------------|-------------------------|-------------|--------|
| rs9837520  | 3   | 49,722,356  | A             | G            | 0.2821                  | 0.0295      | 0.0012 |
| rs2624841  | 3   | 50,198,415  | T             | C            | 0.3383                  | -0.0264     | 0.0011 |
| rs4583487  | 2   | 100,837,126 | T             | G            | 0.3961                  | 0.0230      | 0.0011 |
| rs9372734  | 6   | 98,577,689  | T             | C            | 0.4819                  | 0.0219      | 0.0010 |
| rs1334297  | 13  | 58,335,375  | A             | G            | 0.7407                  | 0.0240      | 0.0012 |
| rs4557790  | 9   | 23,349,982  | A             | C            | 0.5537                  | 0.0205      | 0.0011 |
| rs61160187 | 5   | 60,111,579  | A             | G            | 0.6118                  | -0.0196     | 0.0011 |
| rs10733389 | 9   | 23,378,220  | A             | G            | 0.3804                  | -0.0194     | 0.0011 |
| rs60814418 | 17  | 43,850,645  | T             | C            | 0.2242                  | -0.0226     | 0.0013 |
| rs34305371 | 1   | 72,733,610  | A             | G            | 0.0993                  | 0.0314      | 0.0018 |
| rs12089815 | 1   | 91,189,933  | A             | G            | 0.5396                  | 0.0185      | 0.0011 |
| rs12709690 | 18  | 35,165,852  | T             | C            | 0.3548                  | -0.0186     | 0.0011 |
| rs11664320 | 18  | 50,872,623  | T             | C            | 0.5649                  | 0.0176      | 0.0011 |
| rs9787076  | 1   | 44,141,149  | A             | C            | 0.6711                  | -0.0184     | 0.0011 |
| rs37055887 | 17  | 44,086,726  | T             | C            | 0.7764                  | 0.0233      | 0.0015 |
| rs13135092 | 4   | 103,198,082 | A             | G            | 0.9129                  | 0.0299      | 0.0019 |
| rs3747631  | 1   | 204,587,569 | C             | G            | 0.2148                  | 0.0204      | 0.0013 |
| rs35761247 | 3   | 48,623,124  | A             | G            | 0.055                   | 0.0361      | 0.0023 |
| rs1689510  | 12  | 56,396,768  | C             | G            | 0.3272                  | 0.0174      | 0.0011 |
| rs62244884 | 3   | 71,583,383  | A             | G            | 0.4275                  | 0.0165      | 0.0011 |
| rs1455350  | 2   | 199,497,115 | A             | T            | 0.4866                  | -0.0161     | 0.0010 |
| rs34316    | 5   | 88,015,545  | A             | C            | 0.4285                  | 0.0163      | 0.0011 |
| rs11581447 | 1   | 72,829,683  | A             | C            | 0.1989                  | -0.0196     | 0.0013 |
| rs11774212 | 8   | 145,686,505 | T             | C            | 0.5107                  | 0.0157      | 0.0010 |
| rs2884364  | 2   | 161,977,647 | A             | G            | 0.3818                  | -0.0159     | 0.0011 |
| rs11191193 | 10  | 103,802,408 | A             | G            | 0.6552                  | 0.0163      | 0.0011 |
| rs12897763 | 14  | 29,638,938  | A             | G            | 0.1911                  | 0.0197      | 0.0013 |
| rs12464505 | 2   | 100,876,693 | A             | C            | 0.8034                  | 0.0194      | 0.0013 |
| rs75577466 | 5   | 60,605,507  | C             | G            | 0.1703                  | -0.0204     | 0.0014 |
| rs7306755  | 12  | 123,767,929 | A             | G            | 0.2045                  | 0.0190      | 0.0013 |
| rs6704768  | 2   | 233,592,501 | A             | G            | 0.5664                  | -0.0153     | 0.0011 |
| rs4741600  | 9   | 1,757,753   | T             | C            | 0.3404                  | 0.0158      | 0.0011 |
| rs11813487 | 7   | 11,500,372  | T             | C            | 0.0611                  | -0.0311     | 0.0022 |
| rs73141547 | 3   | 85,657,125  | A             | T            | 0.6554                  | -0.0156     | 0.0011 |
| rs76076331 | 2   | 10,977,585  | T             | C            | 0.1299                  | 0.0221      | 0.0016 |
| rs78410329 | 16  | 730,830     | T             | C            | 0.2242                  | 0.0178      | 0.0013 |
| rs79581555 | 3   | 49,738,816  | A             | G            | 0.0508                  | -0.0342     | 0.0024 |
| rs1043595  | 7   | 128,410,012 | A             | G            | 0.2735                  | 0.0166      | 0.0012 |
| rs6028084  | 20  | 59,838,105  | T             | C            | 0.6106                  | 0.0151      | 0.0011 |
| rs72829857 | 6   | 16,966,052  | A             | G            | 0.7527                  | -0.0170     | 0.0012 |
| rs62260764 | 3   | 47,990,500  | C             | G            | 0.2569                  | -0.0168     | 0.0012 |
| rs2275154  | 1   | 243,433,654 | A             | G            | 0.6708                  | 0.0156      | 0.0011 |
| rs738988   | 22  | 34,289,025  | A             | G            | 0.7149                  | -0.0160     | 0.0012 |
| rs6414946  | 5   | 87,729,711  | A             | C            | 0.521                   | -0.0145     | 0.0010 |
| rs12234936 | 8   | 30,857,668  | T             | C            | 0.419                   | -0.0146     | 0.0011 |

|             |    |             |   |   |        |         |        |
|-------------|----|-------------|---|---|--------|---------|--------|
| rs917294    | 1  | 44,249,485  | A | G | 0.2213 | -0.0172 | 0.0013 |
| rs171697    | 5  | 103,956,516 | C | G | 0.6689 | 0.0152  | 0.0011 |
| rs11688767  | 2  | 57,988,194  | A | T | 0.5107 | -0.0143 | 0.0010 |
| rs11772232  | 7  | 1,856,273   | T | C | 0.1681 | 0.0192  | 0.0014 |
| rs80026423  | 3  | 48,734,861  | T | C | 0.0587 | -0.0303 | 0.0022 |
| rs12506222  | 4  | 67,899,250  | T | C | 0.4417 | -0.0142 | 0.0011 |
| rs7924036   | 10 | 65,191,645  | T | G | 0.5115 | 0.0141  | 0.0010 |
| rs2491365   | 10 | 106,536,976 | T | C | 0.7297 | 0.0159  | 0.0012 |
| rs2901785   | 1  | 174,104,743 | A | G | 0.4485 | 0.0141  | 0.0011 |
| rs114597052 | 5  | 87,885,499  | T | C | 0.0912 | 0.0243  | 0.0018 |
| rs72801843  | 16 | 53,508,802  | A | T | 0.3036 | 0.0152  | 0.0011 |
| rs35319653  | 4  | 140,903,155 | T | C | 0.3396 | 0.0147  | 0.0011 |
| rs62262312  | 3  | 127,145,909 | C | G | 0.162  | 0.0189  | 0.0014 |
| rs56194430  | 5  | 67,824,690  | T | C | 0.1669 | -0.0186 | 0.0014 |
| rs7788620   | 7  | 2,196,349   | A | G | 0.7807 | 0.0167  | 0.0013 |
| rs12699131  | 7  | 71,751,316  | A | G | 0.4729 | 0.0138  | 0.0010 |
| rs72819174  | 2  | 100,728,256 | A | G | 0.0843 | -0.0249 | 0.0019 |
| rs7045411   | 9  | 14,145,058  | A | G | 0.8494 | 0.0193  | 0.0015 |
| rs10189857  | 2  | 60,713,235  | A | G | 0.5701 | 0.0138  | 0.0011 |
| rs7603132   | 2  | 4,951,548   | A | G | 0.1897 | 0.0173  | 0.0013 |
| rs27222     | 5  | 59,752,602  | T | C | 0.3569 | -0.0141 | 0.0011 |
| rs3095075   | 4  | 3,253,183   | A | G | 0.5548 | -0.0136 | 0.0011 |
| rs9789595   | 2  | 107,539,301 | T | C | 0.6081 | 0.0138  | 0.0011 |
| rs13010288  | 2  | 51,824,512  | T | G | 0.1276 | 0.0201  | 0.0016 |
| rs12208753  | 6  | 98,248,413  | A | G | 0.5176 | 0.0134  | 0.0010 |
| rs7150195   | 14 | 69,740,483  | T | G | 0.3758 | 0.0136  | 0.0011 |
| rs56409354  | 1  | 41,772,971  | A | G | 0.2182 | -0.0160 | 0.0013 |
| rs61867294  | 10 | 106,569,207 | A | G | 0.8005 | -0.0165 | 0.0013 |
| rs56016333  | 7  | 104,596,248 | T | C | 0.6488 | -0.0138 | 0.0011 |
| rs9461242   | 6  | 26,314,619  | T | C | 0.3655 | -0.0136 | 0.0011 |
| rs73208982  | 4  | 5,213,120   | C | G | 0.6626 | -0.0139 | 0.0011 |
| rs329120    | 5  | 133,861,756 | T | C | 0.4245 | 0.0133  | 0.0011 |
| rs4850810   | 2  | 193,754,771 | T | G | 0.5292 | -0.0131 | 0.0011 |
| rs1866710   | 11 | 12,875,312  | A | G | 0.2828 | -0.0145 | 0.0012 |
| rs62140599  | 2  | 51,017,478  | A | T | 0.7842 | 0.0158  | 0.0013 |
| rs12069733  | 1  | 43,941,508  | A | G | 0.3666 | -0.0135 | 0.0011 |
| rs3783006   | 13 | 99,111,209  | C | G | 0.4488 | 0.0131  | 0.0011 |
| rs9956721   | 18 | 22,621,869  | A | T | 0.585  | -0.0132 | 0.0011 |
| rs12962980  | 18 | 36,915,043  | C | G | 0.1822 | 0.0168  | 0.0014 |
| rs660010    | 18 | 53,310,969  | C | G | 0.1408 | 0.0186  | 0.0015 |
| rs62172117  | 2  | 144,168,667 | A | G | 0.3525 | 0.0136  | 0.0011 |
| rs4467547   | 4  | 21,945,933  | T | G | 0.4053 | 0.0132  | 0.0011 |
| rs2630767   | 5  | 176,870,700 | T | C | 0.4413 | 0.0130  | 0.0011 |
| rs7032484   | 9  | 124,617,919 | A | G | 0.566  | 0.0130  | 0.0011 |
| rs35088367  | 2  | 100,967,511 | T | C | 0.0384 | 0.0338  | 0.0027 |
| rs4788080   | 16 | 28,558,081  | T | C | 0.3595 | -0.0134 | 0.0011 |
| rs717997    | 12 | 84,133,974  | A | G | 0.4176 | 0.0130  | 0.0011 |
| rs9393415   | 6  | 23,447,436  | T | C | 0.6909 | 0.0138  | 0.0011 |

|            |    |             |   |   |        |         |        |
|------------|----|-------------|---|---|--------|---------|--------|
| rs6960056  | 7  | 92,673,154  | A | G | 0.4397 | 0.0129  | 0.0011 |
| rs11576565 | 1  | 72,114,787  | A | G | 0.488  | 0.0128  | 0.0010 |
| rs2295230  | 6  | 153,365,100 | A | C | 0.7037 | 0.0140  | 0.0012 |
| rs2570492  | 2  | 104,447,905 | A | G | 0.3964 | 0.0130  | 0.0011 |
| rs71541912 | 2  | 60,670,216  | A | T | 0.917  | -0.0230 | 0.0019 |
| rs7356921  | 6  | 152,223,003 | T | C | 0.241  | -0.0148 | 0.0012 |
| rs7236339  | 18 | 77,579,773  | A | G | 0.2174 | -0.0153 | 0.0013 |
| rs12345352 | 9  | 23,378,254  | C | G | 0.9219 | -0.0235 | 0.0020 |
| rs6930903  | 6  | 28,981,244  | A | G | 0.7493 | 0.0159  | 0.0013 |
| rs4588749  | 7  | 3,363,992   | A | G | 0.4464 | 0.0126  | 0.0011 |
| rs9267576  | 6  | 31,812,038  | T | G | 0.1366 | 0.0182  | 0.0015 |
| rs9635366  | 15 | 65,804,986  | A | G | 0.183  | 0.0161  | 0.0014 |
| rs72671456 | 14 | 29,662,737  | A | G | 0.1399 | -0.0179 | 0.0015 |
| rs8020023  | 14 | 26,981,079  | A | G | 0.2379 | 0.0145  | 0.0012 |
| rs14184    | 1  | 110,047,110 | C | G | 0.7007 | -0.0134 | 0.0011 |
| rs7570799  | 2  | 58,577,350  | A | G | 0.189  | -0.0157 | 0.0013 |
| rs17049712 | 2  | 58,961,136  | T | C | 0.2966 | -0.0134 | 0.0011 |
| rs10874759 | 1  | 93,630,172  | A | G | 0.655  | 0.0129  | 0.0011 |
| rs3731769  | 2  | 162,107,295 | T | G | 0.6965 | -0.0133 | 0.0011 |
| rs28396876 | 2  | 144,487,090 | A | G | 0.6169 | -0.0125 | 0.0011 |
| rs4725065  | 7  | 8,109,522   | A | G | 0.4896 | -0.0122 | 0.0010 |
| rs737945   | 22 | 30,202,774  | C | G | 0.4466 | -0.0122 | 0.0011 |
| rs28458909 | 9  | 140,257,189 | T | C | 0.1235 | -0.0190 | 0.0016 |
| rs11149347 | 7  | 100,049,742 | A | G | 0.8025 | 0.0152  | 0.0013 |
| rs8058137  | 16 | 51,190,580  | A | G | 0.7827 | 0.0147  | 0.0013 |
| rs184654   | 11 | 72,364,405  | C | G | 0.8416 | 0.0165  | 0.0014 |
| rs17565975 | 11 | 111,586,950 | A | G | 0.5529 | -0.0121 | 0.0011 |
| rs9411336  | 9  | 134,901,901 | T | C | 0.3234 | -0.0128 | 0.0011 |
| rs9267673  | 6  | 31,883,679  | T | C | 0.0902 | -0.0209 | 0.0018 |
| rs11614957 | 12 | 195,309     | A | G | 0.4423 | 0.0121  | 0.0011 |
| rs362307   | 4  | 3,241,845   | T | C | 0.0744 | -0.0228 | 0.0020 |
| rs4378243  | 1  | 98,395,881  | T | G | 0.8392 | 0.0162  | 0.0014 |
| rs6782698  | 3  | 175,673,379 | A | G | 0.7537 | 0.0138  | 0.0012 |
| rs1167796  | 7  | 75,173,180  | A | G | 0.4253 | 0.0120  | 0.0011 |
| rs1440980  | 11 | 76,495,076  | T | C | 0.2287 | 0.0141  | 0.0012 |
| rs7522356  | 1  | 77,951,460  | T | G | 0.4429 | 0.0119  | 0.0011 |
| rs3763317  | 6  | 32,376,788  | T | C | 0.4487 | -0.0121 | 0.0011 |
| rs11446855 | 5  | 92,870,246  | A | T | 0.0427 | 0.0295  | 0.0026 |
| rs3943933  | 5  | 63,020,327  | A | T | 0.4884 | -0.0118 | 0.0010 |
| rs17522122 | 14 | 33,302,882  | T | G | 0.4767 | -0.0118 | 0.0010 |
| rs2974337  | 8  | 42,390,873  | T | C | 0.4942 | 0.0118  | 0.0010 |
| rs28451864 | 8  | 87,679,777  | A | T | 0.5502 | 0.0118  | 0.0011 |
| rs74181253 | 2  | 57,944,590  | A | T | 0.4524 | -0.0137 | 0.0012 |
| rs10496091 | 2  | 61,482,261  | A | G | 0.2803 | -0.0131 | 0.0012 |
| rs2050256  | 1  | 32,204,683  | A | G | 0.8284 | 0.0156  | 0.0014 |
| rs13140733 | 4  | 2,920,937   | A | G | 0.25   | -0.0136 | 0.0012 |
| rs35733856 | 5  | 30,830,597  | A | G | 0.5961 | -0.0119 | 0.0011 |
| rs7093470  | 10 | 104,670,868 | A | C | 0.7875 | 0.0143  | 0.0013 |

|             |    |             |   |   |        |         |        |
|-------------|----|-------------|---|---|--------|---------|--------|
| rs10984444  | 9  | 121,980,347 | A | C | 0.5076 | -0.0116 | 0.0010 |
| rs1329125   | 1  | 234,740,880 | T | C | 0.3254 | -0.0124 | 0.0011 |
| rs72845696  | 10 | 104,187,404 | T | C | 0.2187 | 0.0140  | 0.0013 |
| rs55897719  | 2  | 212,590,841 | A | C | 0.3055 | -0.0127 | 0.0011 |
| rs67040074  | 2  | 229,017,414 | T | C | 0.3451 | -0.0122 | 0.0011 |
| rs2631535   | 17 | 50,396,092  | A | G | 0.3289 | 0.0123  | 0.0011 |
| rs7040995   | 9  | 92,226,172  | C | G | 0.532  | 0.0116  | 0.0010 |
| rs2293445   | 12 | 49,398,862  | A | G | 0.384  | 0.0119  | 0.0011 |
| rs62543169  | 9  | 73,069,133  | T | C | 0.4276 | -0.0116 | 0.0011 |
| rs35124980  | 3  | 50,199,330  | A | G | 0.0703 | 0.0226  | 0.0021 |
| rs17881016  | 10 | 133,729,181 | A | G | 0.739  | -0.0131 | 0.0012 |
| rs7668960   | 4  | 172,448,875 | T | C | 0.1548 | 0.0159  | 0.0014 |
| rs1267488   | 6  | 14,719,994  | A | G | 0.8202 | -0.0149 | 0.0014 |
| rs34488670  | 15 | 47,684,936  | T | C | 0.7882 | 0.0140  | 0.0013 |
| rs3098650   | 2  | 164,381,648 | C | G | 0.6237 | 0.0118  | 0.0011 |
| rs9388490   | 6  | 126,704,795 | T | C | 0.4488 | 0.0115  | 0.0011 |
| rs12126231  | 1  | 184,698,816 | A | G | 0.6159 | 0.0117  | 0.0011 |
| rs1452366   | 4  | 82,252,467  | T | G | 0.3518 | -0.0119 | 0.0011 |
| rs2764684   | 1  | 58,537,919  | T | C | 0.8279 | 0.0150  | 0.0014 |
| rs17248751  | 16 | 61,579,618  | A | G | 0.7846 | -0.0138 | 0.0013 |
| rs960740    | 4  | 35,459,174  | A | T | 0.491  | -0.0113 | 0.0010 |
| rs2026037   | 9  | 23,762,529  | T | C | 0.8408 | 0.0154  | 0.0014 |
| rs10887465  | 10 | 87,016,897  | A | C | 0.2658 | 0.0128  | 0.0012 |
| rs11157931  | 14 | 23,403,193  | A | C | 0.3923 | -0.0115 | 0.0011 |
| rs16993330  | 22 | 34,343,697  | A | C | 0.0587 | -0.0240 | 0.0022 |
| rs7670522   | 4  | 106,160,365 | A | C | 0.4727 | 0.0127  | 0.0012 |
| rs12273435  | 11 | 133,825,855 | A | G | 0.201  | -0.0141 | 0.0013 |
| rs2309723   | 2  | 100,346,964 | T | C | 0.45   | -0.0113 | 0.0011 |
| rs7632819   | 3  | 108,071,811 | A | G | 0.755  | -0.0130 | 0.0012 |
| rs975303    | 6  | 19,028,788  | A | G | 0.8265 | -0.0148 | 0.0014 |
| rs12468040  | 2  | 44,854,981  | T | G | 0.3774 | 0.0115  | 0.0011 |
| rs3731507   | 3  | 48,222,353  | T | C | 0.0438 | 0.0276  | 0.0026 |
| rs63303162  | 4  | 176,641,242 | A | G | 0.5593 | 0.0112  | 0.0011 |
| rs78280128  | 4  | 106,264,781 | A | G | 0.9143 | -0.0199 | 0.0019 |
| rs12128772  | 1  | 96,176,709  | A | G | 0.4975 | -0.0111 | 0.0010 |
| rs1464018   | 3  | 103,298,871 | T | C | 0.2106 | -0.0136 | 0.0013 |
| rs36142021  | 6  | 119,159,482 | T | C | 0.3024 | -0.0121 | 0.0011 |
| rs111821073 | 9  | 99,084,793  | T | C | 0.1544 | 0.0153  | 0.0015 |
| rs2167763   | 5  | 93,257,240  | A | G | 0.6867 | 0.0119  | 0.0011 |
| rs10992836  | 9  | 96,422,420  | T | C | 0.3407 | -0.0116 | 0.0011 |
| rs2160514   | 12 | 16,756,508  | A | C | 0.5614 | -0.0111 | 0.0011 |
| rs12155540  | 8  | 93,206,092  | T | C | 0.3295 | 0.0117  | 0.0011 |
| rs7026972   | 9  | 111,750,523 | T | C | 0.6439 | -0.0115 | 0.0011 |
| rs11081529  | 18 | 75,902,735  | T | C | 0.7213 | 0.0123  | 0.0012 |
| rs28588750  | 7  | 133,629,138 | A | G | 0.6402 | 0.0115  | 0.0011 |
| rs7810903   | 7  | 11,904,138  | A | C | 0.306  | 0.0119  | 0.0011 |
| rs7187692   | 16 | 72,017,495  | C | G | 0.5196 | 0.0110  | 0.0010 |
| rs7911488   | 10 | 105,154,089 | A | G | 0.6723 | -0.0117 | 0.0011 |

|             |    |             |   |   |        |         |        |
|-------------|----|-------------|---|---|--------|---------|--------|
| rs71658797  | 1  | 77,967,507  | A | T | 0.1116 | -0.0175 | 0.0017 |
| rs9297016   | 6  | 16,663,101  | A | G | 0.3986 | 0.0112  | 0.0011 |
| rs28661002  | 9  | 126,335,211 | T | C | 0.757  | 0.0128  | 0.0012 |
| rs17503473  | 5  | 120,102,553 | T | C | 0.6977 | 0.0119  | 0.0011 |
| rs55900829  | 4  | 35,514,712  | A | T | 0.5097 | 0.0127  | 0.0012 |
| rs4691601   | 4  | 160,599,341 | A | T | 0.4618 | -0.0110 | 0.0010 |
| rs7304399   | 12 | 14,645,350  | A | G | 0.4606 | 0.0109  | 0.0010 |
| rs1493159   | 4  | 28,719,509  | T | C | 0.8453 | 0.0150  | 0.0014 |
| rs12124493  | 1  | 98,765,641  | A | G | 0.313  | -0.0117 | 0.0011 |
| rs2304282   | 8  | 142,229,543 | A | G | 0.4148 | 0.0110  | 0.0011 |
| rs4553692   | 18 | 38,040,163  | A | G | 0.3714 | 0.0112  | 0.0011 |
| rs7652260   | 3  | 50,571,585  | C | G | 0.8408 | 0.0148  | 0.0014 |
| rs72890842  | 2  | 172,843,278 | T | G | 0.7563 | 0.0126  | 0.0012 |
| rs6794114   | 3  | 82,546,836  | A | T | 0.6665 | -0.0115 | 0.0011 |
| rs8044562   | 16 | 82,876,486  | A | G | 0.2846 | -0.0119 | 0.0012 |
| rs10468056  | 15 | 73,377,122  | T | G | 0.3464 | 0.0114  | 0.0011 |
| rs28381527  | 6  | 88,369,032  | A | G | 0.0784 | -0.0200 | 0.0019 |
| rs9540731   | 13 | 66,949,370  | T | C | 0.5052 | 0.0107  | 0.0010 |
| rs55975662  | 3  | 180,872,919 | A | G | 0.8566 | 0.0153  | 0.0015 |
| rs872602    | 3  | 185,826,028 | A | G | 0.2405 | -0.0126 | 0.0012 |
| rs1483148   | 2  | 142,319,770 | T | G | 0.7312 | 0.0121  | 0.0012 |
| rs1058790   | 1  | 8,413,839   | A | G | 0.8205 | -0.0140 | 0.0014 |
| rs117070316 | 7  | 127,668,769 | T | G | 0.032  | 0.0351  | 0.0034 |
| rs1738050   | 1  | 44,707,295  | C | G | 0.6159 | -0.0110 | 0.0011 |
| rs2364543   | 1  | 41,833,089  | T | G | 0.6077 | 0.0110  | 0.0011 |
| rs9467804   | 6  | 26,583,129  | T | C | 0.4764 | -0.0107 | 0.0010 |
| rs4283969   | 7  | 137,071,327 | T | G | 0.6436 | 0.0111  | 0.0011 |
| rs10745307  | 1  | 110,580,215 | A | G | 0.5474 | -0.0107 | 0.0011 |
| rs10927053  | 1  | 243,811,321 | A | T | 0.8944 | -0.0173 | 0.0017 |
| rs42210     | 5  | 166,408,788 | C | G | 0.7123 | -0.0118 | 0.0012 |
| rs10063055  | 5  | 140,990,108 | T | C | 0.2371 | -0.0125 | 0.0012 |
| rs73117392  | 3  | 70,002,020  | T | C | 0.9437 | -0.0231 | 0.0023 |
| rs75687828  | 16 | 89,618,876  | A | G | 0.0852 | 0.0191  | 0.0019 |
| rs12055782  | 6  | 128,312,033 | A | G | 0.7179 | -0.0118 | 0.0012 |
| rs12617656  | 2  | 162,851,147 | T | C | 0.6754 | -0.0130 | 0.0013 |
| rs4076457   | 15 | 78,007,213  | T | C | 0.2514 | 0.0122  | 0.0012 |
| rs6713695   | 2  | 215,393,529 | A | G | 0.4684 | -0.0106 | 0.0010 |
| rs11773992  | 8  | 12,667,804  | C | G | 0.1783 | -0.0138 | 0.0014 |
| rs4142949   | 1  | 74,572,255  | A | C | 0.5269 | 0.0106  | 0.0010 |
| rs56133711  | 11 | 27,723,334  | A | G | 0.2461 | -0.0122 | 0.0012 |
| rs77580539  | 3  | 50,127,445  | T | C | 0.0494 | -0.0244 | 0.0024 |
| rs1866823   | 8  | 57,436,577  | A | G | 0.5413 | 0.0106  | 0.0011 |
| rs2279574   | 12 | 89,745,477  | A | C | 0.5354 | 0.0106  | 0.0010 |
| rs1564760   | 3  | 47,582,724  | A | C | 0.6831 | 0.0113  | 0.0011 |
| rs12807135  | 11 | 115,053,508 | C | G | 0.5126 | -0.0105 | 0.0010 |
| rs13159124  | 5  | 3,422,780   | A | G | 0.6795 | -0.0113 | 0.0011 |
| rs12453010  | 17 | 50,316,131  | T | C | 0.3943 | -0.0107 | 0.0011 |
| rs4798783   | 18 | 9,174,885   | A | G | 0.7072 | -0.0115 | 0.0011 |

|            |    |             |   |   |        |         |        |
|------------|----|-------------|---|---|--------|---------|--------|
| rs10765789 | 11 | 95,839,543  | A | G | 0.3827 | 0.0108  | 0.0011 |
| rs4818226  | 21 | 42,633,065  | A | G | 0.3202 | 0.0112  | 0.0011 |
| rs62439683 | 7  | 21,406,125  | A | C | 0.2506 | -0.0121 | 0.0012 |
| rs4876775  | 8  | 118,944,974 | A | G | 0.3152 | -0.0113 | 0.0011 |
| rs12937411 | 17 | 34,950,239  | T | C | 0.4094 | 0.0106  | 0.0011 |
| rs12764593 | 10 | 107,491,895 | C | G | 0.0611 | 0.0219  | 0.0022 |
| rs72886472 | 18 | 36,659,093  | T | C | 0.7344 | 0.0118  | 0.0012 |
| rs28807201 | 21 | 20,044,236  | T | C | 0.6998 | -0.0114 | 0.0011 |
| rs68140214 | 2  | 237,078,557 | A | G | 0.1743 | -0.0138 | 0.0014 |
| rs11876620 | 18 | 52,737,309  | T | C | 0.0967 | 0.0177  | 0.0018 |
| rs72813988 | 2  | 58,842,908  | A | C | 0.2092 | 0.0128  | 0.0013 |
| rs2303083  | 16 | 24,835,168  | A | G | 0.1889 | 0.0133  | 0.0013 |
| rs11243852 | 9  | 135,508,738 | T | C | 0.2381 | 0.0122  | 0.0012 |
| rs165633   | 22 | 29,880,773  | A | G | 0.7668 | -0.0123 | 0.0012 |
| rs17563464 | 5  | 26,913,774  | A | C | 0.2189 | -0.0127 | 0.0013 |
| rs406413   | 5  | 113,898,581 | A | T | 0.7867 | 0.0127  | 0.0013 |
| rs6570660  | 6  | 145,230,852 | T | C | 0.2688 | -0.0117 | 0.0012 |
| rs4127499  | 11 | 122,176,383 | A | G | 0.345  | 0.0110  | 0.0011 |
| rs590013   | 1  | 29,155,738  | T | C | 0.6719 | 0.0111  | 0.0011 |
| rs10240905 | 7  | 32,263,069  | T | C | 0.3661 | -0.0108 | 0.0011 |
| rs12637456 | 3  | 123,744,663 | A | T | 0.2833 | -0.0115 | 0.0012 |
| rs1904823  | 4  | 170,956,772 | T | C | 0.2492 | -0.0120 | 0.0012 |
| rs2618039  | 1  | 112,324,111 | A | T | 0.6105 | 0.0106  | 0.0011 |
| rs933830   | 4  | 68,019,294  | A | C | 0.7594 | 0.0121  | 0.0012 |
| rs2431023  | 15 | 57,553,832  | A | T | 0.4166 | 0.0105  | 0.0011 |
| rs14433675 | 8  | 143,356,114 | A | G | 0.0176 | 0.0396  | 0.0040 |
| rs10734924 | 12 | 123,018,894 | T | G | 0.2622 | -0.0118 | 0.0012 |
| rs56081191 | 6  | 98,557,732  | A | G | 0.0807 | 0.0192  | 0.0019 |
| rs9915323  | 17 | 37,770,481  | A | T | 0.2934 | -0.0113 | 0.0011 |
| rs13254311 | 8  | 4,800,482   | A | G | 0.6753 | 0.0110  | 0.0011 |
| rs62379379 | 5  | 141,082,015 | T | G | 0.0741 | -0.0198 | 0.0020 |
| rs1865407  | 5  | 136,517,761 | A | G | 0.1296 | -0.0154 | 0.0016 |
| rs76878669 | 11 | 66,092,567  | C | G | 0.7581 | 0.0121  | 0.0012 |
| rs912609   | 13 | 31,788,335  | T | G | 0.2251 | 0.0123  | 0.0013 |
| rs1291865  | 10 | 11,082,192  | T | G | 0.5105 | -0.0103 | 0.0010 |
| rs7679853  | 4  | 30,908,922  | A | G | 0.3359 | -0.0109 | 0.0011 |
| rs58694847 | 14 | 84,916,511  | C | G | 0.2595 | -0.0117 | 0.0012 |
| rs966221   | 5  | 59,502,520  | A | G | 0.4083 | -0.0105 | 0.0011 |
| rs660549   | 12 | 121,300,988 | T | C | 0.5742 | -0.0104 | 0.0011 |
| rs12170452 | 22 | 40,019,773  | A | G | 0.4445 | 0.0103  | 0.0011 |
| rs799443   | 7  | 44,769,013  | A | T | 0.6654 | -0.0109 | 0.0011 |
| rs11733439 | 4  | 30,534,692  | A | G | 0.7881 | -0.0126 | 0.0013 |
| rs12676597 | 8  | 9,332,605   | T | C | 0.3652 | 0.0107  | 0.0011 |
| rs997467   | 2  | 199,182,704 | T | C | 0.433  | 0.0104  | 0.0011 |
| rs10278242 | 7  | 2,323,019   | C | G | 0.6541 | -0.0108 | 0.0011 |
| rs12131823 | 1  | 235,554,749 | A | G | 0.5374 | 0.0103  | 0.0011 |
| rs11100308 | 4  | 140,769,923 | T | G | 0.675  | -0.0109 | 0.0011 |
| rs13392115 | 2  | 101,130,820 | C | G | 0.828  | -0.0136 | 0.0014 |

|             |    |             |   |   |        |         |        |
|-------------|----|-------------|---|---|--------|---------|--------|
| rs72717150  | 14 | 57,314,430  | A | G | 0.0747 | -0.0194 | 0.0020 |
| rs6978112   | 7  | 1,966,841   | T | C | 0.4068 | -0.0104 | 0.0011 |
| rs1464297   | 2  | 140,653,749 | T | C | 0.6515 | -0.0107 | 0.0011 |
| rs9922788   | 16 | 12,243,932  | A | G | 0.4337 | 0.0103  | 0.0011 |
| rs7430651   | 3  | 116,582,186 | T | C | 0.2866 | -0.0113 | 0.0012 |
| rs6852084   | 4  | 147,803,578 | A | C | 0.6172 | -0.0105 | 0.0011 |
| rs1517480   | 2  | 226,281,992 | T | G | 0.1985 | 0.0127  | 0.0013 |
| rs7601892   | 2  | 100,789,490 | A | G | 0.3819 | 0.0105  | 0.0011 |
| rs17742342  | 2  | 148,633,936 | A | C | 0.799  | -0.0127 | 0.0013 |
| rs2610990   | 4  | 18,008,232  | A | G | 0.2583 | 0.0116  | 0.0012 |
| rs11690035  | 2  | 145,603,306 | T | C | 0.0742 | -0.0193 | 0.0020 |
| rs77584294  | 1  | 75,541,089  | A | C | 0.0399 | 0.0259  | 0.0027 |
| rs705240    | 3  | 118,457,615 | T | C | 0.1853 | -0.0130 | 0.0013 |
| rs55633081  | 7  | 49,863,017  | A | T | 0.744  | 0.0116  | 0.0012 |
| rs11599424  | 10 | 3,993,417   | A | T | 0.3793 | 0.0105  | 0.0011 |
| rs73457936  | 9  | 23,233,667  | A | G | 0.917  | 0.0183  | 0.0019 |
| rs9599352   | 13 | 69,493,548  | A | G | 0.4683 | -0.0101 | 0.0010 |
| rs117005905 | 6  | 114,218,608 | T | C | 0.119  | 0.0156  | 0.0016 |
| rs6450476   | 5  | 57,771,087  | A | G | 0.2909 | -0.0111 | 0.0012 |
| rs4805761   | 19 | 32,951,800  | A | G | 0.1567 | -0.0139 | 0.0014 |
| rs801742    | 11 | 65,914,766  | A | C | 0.3485 | 0.0106  | 0.0011 |
| rs12133735  | 1  | 204,556,836 | T | G | 0.6549 | 0.0106  | 0.0011 |
| rs12957463  | 18 | 37,412,228  | A | G | 0.7956 | 0.0125  | 0.0013 |
| rs11209771  | 1  | 71,817,309  | A | G | 0.7876 | -0.0123 | 0.0013 |
| rs596160    | 11 | 121,982,707 | A | G | 0.4223 | -0.0102 | 0.0011 |
| rs3895736   | 3  | 48,658,467  | A | C | 0.1738 | 0.0133  | 0.0014 |
| rs10496632  | 2  | 125,014,321 | C | G | 0.2838 | 0.0111  | 0.0012 |
| rs74710412  | 16 | 62,086,038  | A | G | 0.1592 | 0.0138  | 0.0014 |
| rs9985296   | 3  | 36,889,621  | T | C | 0.3825 | -0.0103 | 0.0011 |
| rs12613500  | 2  | 180,928,465 | C | G | 0.4274 | 0.0101  | 0.0011 |
| rs4726070   | 7  | 151,328,218 | A | G | 0.5979 | 0.0102  | 0.0011 |
| rs6681024   | 1  | 243,741,246 | T | C | 0.8637 | 0.0146  | 0.0015 |
| rs80171383  | 11 | 46,084,677  | A | G | 0.1355 | 0.0146  | 0.0015 |
| rs11789013  | 9  | 109,677,417 | T | C | 0.7554 | 0.0117  | 0.0012 |
| rs7979979   | 12 | 106,917,159 | T | C | 0.2438 | -0.0116 | 0.0012 |
| rs10822745  | 10 | 67,954,065  | T | C | 0.5769 | 0.0101  | 0.0011 |
| rs11172371  | 12 | 58,286,188  | T | C | 0.3227 | -0.0107 | 0.0011 |
| rs71411521  | 2  | 51,202,876  | T | C | 0.1506 | 0.0140  | 0.0015 |
| rs2301015   | 5  | 109,143,386 | T | C | 0.3267 | -0.0106 | 0.0011 |
| rs5021426   | 3  | 18,700,484  | T | C | 0.7246 | -0.0112 | 0.0012 |
| rs7240432   | 18 | 9,590,896   | T | G | 0.3583 | 0.0104  | 0.0011 |
| rs6497339   | 16 | 19,277,493  | A | T | 0.4457 | 0.0100  | 0.0011 |
| rs11780633  | 8  | 87,164,511  | T | C | 0.1408 | -0.0143 | 0.0015 |
| rs252991    | 5  | 106,767,346 | A | G | 0.375  | 0.0103  | 0.0011 |
| rs17669337  | 5  | 92,187,932  | T | C | 0.4117 | -0.0101 | 0.0011 |
| rs10145520  | 14 | 21,930,932  | T | G | 0.8074 | -0.0126 | 0.0013 |
| rs6466819   | 7  | 122,097,058 | A | G | 0.3678 | -0.0103 | 0.0011 |
| rs4800615   | 18 | 22,622,445  | T | G | 0.1168 | -0.0154 | 0.0016 |

|            |    |             |   |   |        |         |        |
|------------|----|-------------|---|---|--------|---------|--------|
| rs7977614  | 12 | 110,115,286 | A | G | 0.7172 | -0.0112 | 0.0012 |
| rs8614     | 17 | 27,588,806  | A | C | 0.1872 | -0.0127 | 0.0013 |
| rs6956283  | 7  | 98,756,597  | T | C | 0.7329 | 0.0112  | 0.0012 |
| rs73050239 | 3  | 23,206,858  | T | C | 0.817  | -0.0128 | 0.0014 |
| rs359233   | 2  | 60,470,926  | A | G | 0.3738 | 0.0102  | 0.0011 |
| rs7405130  | 16 | 15,147,725  | T | C | 0.149  | -0.0140 | 0.0015 |
| rs7650602  | 3  | 141,147,414 | T | C | 0.5651 | -0.0100 | 0.0011 |
| rs6711399  | 2  | 200,462,840 | T | C | 0.181  | -0.0129 | 0.0014 |
| rs10920254 | 1  | 201,767,474 | C | G | 0.3563 | 0.0103  | 0.0011 |
| rs11737459 | 4  | 159,858,736 | A | T | 0.6958 | 0.0107  | 0.0011 |
| rs7125588  | 11 | 113,436,072 | A | G | 0.5656 | -0.0100 | 0.0011 |
| rs7115551  | 11 | 29,079,315  | A | C | 0.8916 | 0.0159  | 0.0017 |
| rs36048136 | 4  | 83,288,006  | A | G | 0.2269 | 0.0118  | 0.0013 |
| rs57761252 | 2  | 161,865,998 | A | G | 0.2094 | 0.0121  | 0.0013 |
| rs9764     | 4  | 164,245,405 | T | C | 0.7306 | 0.0112  | 0.0012 |
| rs34743418 | 3  | 143,657,807 | T | C | 0.4367 | -0.0100 | 0.0011 |
| rs2141277  | 7  | 39,099,178  | A | G | 0.4789 | 0.0098  | 0.0010 |
| rs7677621  | 4  | 176,919,065 | T | C | 0.3531 | -0.0103 | 0.0011 |
| rs786244   | 2  | 145,756,260 | C | G | 0.3574 | 0.0103  | 0.0011 |
| rs11028323 | 11 | 25,009,896  | A | C | 0.5149 | -0.0098 | 0.0010 |
| rs7559005  | 2  | 201,161,371 | T | C | 0.4249 | -0.0099 | 0.0011 |
| rs2515919  | 6  | 31,564,167  | A | G | 0.6256 | 0.0101  | 0.0011 |
| rs6569077  | 6  | 98,212,409  | T | C | 0.384  | 0.0101  | 0.0011 |
| rs10810620 | 9  | 1,686,322   | A | G | 0.5027 | 0.0098  | 0.0010 |
| rs4728354  | 7  | 135,051,979 | T | C | 0.5508 | 0.0099  | 0.0011 |
| rs958131   | 12 | 23,071,252  | A | G | 0.3941 | 0.0100  | 0.0011 |
| rs34189321 | 2  | 203,036,920 | A | T | 0.8736 | 0.0147  | 0.0016 |
| rs10193498 | 2  | 174,094,345 | A | T | 0.7471 | 0.0113  | 0.0012 |
| rs16903468 | 5  | 88,427,942  | T | G | 0.1929 | 0.0124  | 0.0013 |
| rs7431531  | 3  | 105,198,374 | T | C | 0.6791 | -0.0105 | 0.0011 |
| rs10762069 | 10 | 68,208,954  | C | G | 0.6818 | 0.0105  | 0.0011 |
| rs658938   | 11 | 65,651,830  | A | G | 0.194  | -0.0124 | 0.0013 |
| rs837080   | 8  | 130,925,116 | T | C | 0.5225 | -0.0098 | 0.0010 |
| rs72915557 | 2  | 175,199,092 | A | G | 0.0598 | -0.0206 | 0.0022 |
| rs1056010  | 12 | 54,626,752  | T | C | 0.6058 | -0.0100 | 0.0011 |
| rs863006   | 1  | 159,177,748 | A | G | 0.5624 | -0.0098 | 0.0011 |
| rs2614463  | 14 | 99,746,274  | A | T | 0.5874 | -0.0099 | 0.0011 |
| rs6659216  | 1  | 91,123,304  | A | G | 0.1121 | -0.0154 | 0.0017 |
| rs7635063  | 3  | 107,818,777 | A | G | 0.3189 | 0.0104  | 0.0011 |
| rs9538497  | 13 | 60,257,513  | A | T | 0.2653 | 0.0110  | 0.0012 |
| rs35271256 | 7  | 126,108,914 | A | G | 0.836  | 0.0131  | 0.0014 |
| rs663234   | 1  | 57,735,595  | C | G | 0.3996 | 0.0099  | 0.0011 |
| rs10788951 | 1  | 53,734,998  | A | T | 0.4045 | -0.0100 | 0.0011 |
| rs748832   | 3  | 16,851,202  | A | G | 0.6314 | 0.0101  | 0.0011 |
| rs78631600 | 12 | 12,419,719  | T | G | 0.0783 | -0.0181 | 0.0019 |
| rs13429686 | 2  | 105,925,165 | A | G | 0.8725 | 0.0145  | 0.0016 |
| rs3108680  | 1  | 107,572,997 | T | C | 0.6531 | 0.0102  | 0.0011 |
| rs2264021  | 2  | 194,283,676 | A | G | 0.6778 | 0.0104  | 0.0011 |



|             |    |             |   |   |        |         |        |
|-------------|----|-------------|---|---|--------|---------|--------|
| rs10241183  | 7  | 86,230,375  | T | C | 0.3563 | -0.0101 | 0.0011 |
| rs1013982   | 16 | 72,450,482  | A | G | 0.6402 | -0.0101 | 0.0011 |
| rs322627    | 11 | 29,731,571  | C | G | 0.3777 | -0.0100 | 0.0011 |
| rs35567946  | 8  | 135,416,103 | C | G | 0.5908 | -0.0099 | 0.0011 |
| rs13131350  | 4  | 17,877,487  | A | G | 0.8615 | 0.0140  | 0.0015 |
| rs2031047   | 7  | 1,792,201   | A | G | 0.3267 | -0.0104 | 0.0011 |
| rs1024374   | 22 | 51,149,320  | C | G | 0.5398 | 0.0098  | 0.0011 |
| rs4358081   | 2  | 29,100,642  | A | C | 0.531  | -0.0097 | 0.0010 |
| rs6715321   | 2  | 100,109,001 | T | C | 0.4284 | -0.0098 | 0.0011 |
| rs4785187   | 16 | 49,766,772  | A | G | 0.2233 | -0.0116 | 0.0013 |
| rs66716825  | 12 | 15,554,246  | C | G | 0.2426 | -0.0113 | 0.0012 |
| rs2977467   | 8  | 141,547,712 | T | C | 0.7868 | -0.0119 | 0.0013 |
| rs72662300  | 14 | 30,767,400  | T | G | 0.3327 | 0.0102  | 0.0011 |
| rs56059718  | 15 | 38,836,777  | A | C | 0.1943 | -0.0122 | 0.0013 |
| rs2916490   | 2  | 80,192,352  | A | G | 0.3069 | -0.0104 | 0.0011 |
| rs6534338   | 4  | 123,026,869 | T | C | 0.3014 | 0.0105  | 0.0011 |
| rs62256287  | 3  | 70,543,647  | A | G | 0.331  | 0.0102  | 0.0011 |
| rs1632994   | 6  | 29,926,597  | T | C | 0.5156 | 0.0097  | 0.0011 |
| rs17390646  | 18 | 50,451,397  | C | G | 0.1279 | -0.0146 | 0.0016 |
| rs9356034   | 6  | 162,946,186 | T | C | 0.6834 | 0.0103  | 0.0011 |
| rs586829    | 3  | 20,553,778  | A | G | 0.6292 | 0.0099  | 0.0011 |
| rs902712    | 3  | 70,033,238  | A | G | 0.7314 | 0.0108  | 0.0012 |
| rs12532008  | 7  | 850,653     | T | C | 0.6242 | -0.0099 | 0.0011 |
| rs1921608   | 2  | 49,674,879  | A | G | 0.615  | 0.0098  | 0.0011 |
| rs12679743  | 8  | 10,123,284  | T | C | 0.1474 | -0.0135 | 0.0015 |
| rs9965170   | 18 | 44,788,274  | A | G | 0.4297 | 0.0097  | 0.0011 |
| rs6020560   | 20 | 49,119,419  | T | C | 0.5245 | -0.0096 | 0.0010 |
| rs116093870 | 10 | 103,984,390 | T | C | 0.9399 | 0.0201  | 0.0022 |
| rs7716876   | 5  | 91,130,058  | T | C | 0.2795 | -0.0106 | 0.0012 |
| rs933738    | 12 | 49,943,122  | A | G | 0.8199 | -0.0124 | 0.0014 |
| rs4911257   | 20 | 31,359,574  | T | C | 0.6131 | 0.0098  | 0.0011 |
| rs34559418  | 7  | 85,653,187  | A | T | 0.8951 | -0.0156 | 0.0017 |
| rs9977825   | 21 | 46,494,995  | T | C | 0.363  | -0.0099 | 0.0011 |
| rs72993796  | 2  | 240,321,051 | T | C | 0.882  | 0.0149  | 0.0016 |
| rs746839    | 8  | 142,617,261 | C | G | 0.633  | 0.0099  | 0.0011 |
| rs10862376  | 12 | 82,257,633  | A | T | 0.1473 | 0.0134  | 0.0015 |
| rs12111032  | 6  | 31,242,191  | A | G | 0.7493 | 0.0110  | 0.0012 |
| rs17062133  | 4  | 176,762,282 | A | G | 0.6605 | -0.0101 | 0.0011 |
| rs17400325  | 2  | 178,565,913 | T | C | 0.9597 | -0.0242 | 0.0027 |
| rs6747129   | 2  | 225,477,542 | A | G | 0.1026 | -0.0157 | 0.0017 |
| rs11192147  | 10 | 106,413,046 | A | C | 0.4452 | 0.0096  | 0.0011 |
| rs72976737  | 2  | 161,298,343 | A | G | 0.0369 | 0.0252  | 0.0028 |
| rs2964252   | 5  | 152,067,929 | A | G | 0.3111 | 0.0102  | 0.0011 |
| rs115669814 | 3  | 50,102,446  | T | C | 0.934  | -0.0192 | 0.0021 |
| rs59123361  | 1  | 110,766,454 | A | G | 0.1027 | -0.0157 | 0.0017 |
| rs2441019   | 5  | 170,468,415 | A | T | 0.687  | -0.0102 | 0.0011 |
| rs62247449  | 3  | 64,430,551  | C | G | 0.4349 | 0.0095  | 0.0011 |
| rs17680712  | 8  | 87,300,775  | T | C | 0.44   | -0.0095 | 0.0011 |

|             |    |             |   |   |        |         |        |
|-------------|----|-------------|---|---|--------|---------|--------|
| rs9891803   | 17 | 31,609,815  | T | C | 0.4965 | -0.0095 | 0.0010 |
| rs8072494   | 17 | 33,256,917  | A | G | 0.7895 | -0.0116 | 0.0013 |
| rs35316276  | 16 | 67,850,700  | T | C | 0.2846 | 0.0105  | 0.0012 |
| rs113758614 | 5  | 60,484,624  | T | G | 0.0207 | -0.0333 | 0.0037 |
| rs7736817   | 5  | 59,036,578  | A | G | 0.4782 | 0.0095  | 0.0010 |
| rs1566779   | 5  | 62,946,113  | A | G | 0.3821 | -0.0097 | 0.0011 |
| rs4872449   | 8  | 26,370,514  | A | G | 0.4304 | 0.0095  | 0.0011 |
| rs72672601  | 14 | 42,671,683  | A | G | 0.5715 | -0.0095 | 0.0011 |
| rs1943107   | 18 | 50,425,132  | A | G | 0.8727 | -0.0141 | 0.0016 |
| rs844675    | 7  | 71,499,574  | T | C | 0.2984 | -0.0103 | 0.0011 |
| rs17597349  | 18 | 39,291,937  | T | C | 0.115  | 0.0148  | 0.0016 |
| rs4856570   | 3  | 85,466,861  | T | C | 0.8666 | 0.0138  | 0.0015 |
| rs2939261   | 5  | 90,965,294  | C | G | 0.788  | 0.0115  | 0.0013 |
| rs12828220  | 12 | 27,397,792  | T | C | 0.6333 | -0.0097 | 0.0011 |
| rs12692779  | 2  | 166,653,823 | T | C | 0.2748 | -0.0105 | 0.0012 |
| rs989996    | 7  | 117,642,252 | T | C | 0.4608 | -0.0094 | 0.0010 |
| rs17096452  | 14 | 98,578,983  | A | T | 0.783  | 0.0114  | 0.0013 |
| rs905993    | 3  | 131,966,747 | C | G | 0.3892 | -0.0096 | 0.0011 |
| rs116295561 | 2  | 162,157,306 | T | C | 0.0331 | 0.0262  | 0.0029 |
| rs2668196   | 3  | 165,502,709 | A | T | 0.1939 | -0.0119 | 0.0013 |
| rs564887695 | 5  | 87,285,074  | C | G | 0.9844 | 0.0400  | 0.0045 |
| rs778342    | 2  | 233,798,155 | A | G | 0.0788 | 0.0175  | 0.0020 |
| rs9859719   | 3  | 75,039,122  | A | G | 0.2223 | -0.0113 | 0.0013 |
| rs9303471   | 17 | 43,456,342  | A | C | 0.3624 | -0.0098 | 0.0011 |
| rs6689362   | 1  | 91,203,251  | A | T | 0.6934 | -0.0102 | 0.0011 |
| rs4772268   | 13 | 100,825,526 | A | G | 0.3342 | 0.0099  | 0.0011 |
| rs57349798  | 6  | 37,486,052  | A | G | 0.4117 | 0.0095  | 0.0011 |
| rs6738860   | 2  | 22,442,099  | A | T | 0.4539 | -0.0094 | 0.0011 |
| rs11775108  | 8  | 143,110,476 | A | G | 0.4871 | -0.0093 | 0.0010 |
| rs62137021  | 2  | 48,637,390  | T | G | 0.3163 | 0.0100  | 0.0011 |
| rs6457796   | 6  | 34,828,553  | T | C | 0.7189 | 0.0104  | 0.0012 |
| rs10929474  | 2  | 7,377,513   | A | T | 0.2135 | 0.0114  | 0.0013 |
| rs7147566   | 14 | 30,608,327  | T | G | 0.2771 | 0.0104  | 0.0012 |
| rs77371395  | 6  | 28,744,828  | A | G | 0.0759 | -0.0177 | 0.0020 |
| rs1392816   | 1  | 66,481,188  | T | C | 0.3814 | 0.0096  | 0.0011 |
| rs57319644  | 3  | 84,664,410  | A | G | 0.4181 | 0.0094  | 0.0011 |
| rs73265641  | 14 | 64,949,864  | A | G | 0.3122 | 0.0100  | 0.0011 |
| rs9560707   | 13 | 91,509,113  | A | T | 0.7    | 0.0102  | 0.0011 |
| rs80257979  | 12 | 49,402,562  | T | G | 0.9672 | -0.0262 | 0.0029 |
| rs6956241   | 7  | 75,900,223  | T | G | 0.1403 | 0.0134  | 0.0015 |
| rs2063569   | 1  | 211,563,175 | C | G | 0.3731 | -0.0096 | 0.0011 |
| rs6929638   | 6  | 144,965,158 | A | G | 0.5298 | 0.0093  | 0.0010 |
| rs9359939   | 6  | 92,133,241  | A | C | 0.2421 | -0.0108 | 0.0012 |
| rs2418736   | 16 | 68,154,862  | A | G | 0.1853 | -0.0120 | 0.0013 |
| rs34591327  | 2  | 51,009,838  | C | G | 0.1234 | 0.0142  | 0.0016 |
| rs13163062  | 5  | 106,955,451 | T | C | 0.426  | 0.0094  | 0.0011 |
| rs58137875  | 18 | 40,230,965  | A | G | 0.2691 | -0.0105 | 0.0012 |
| rs2477674   | 10 | 99,712,134  | A | T | 0.3236 | -0.0100 | 0.0011 |

|             |    |             |   |   |        |         |        |
|-------------|----|-------------|---|---|--------|---------|--------|
| rs2371001   | 2  | 211,467,548 | A | G | 0.5108 | -0.0093 | 0.0010 |
| rs12359372  | 10 | 67,767,951  | T | C | 0.6616 | -0.0098 | 0.0011 |
| rs12604573  | 18 | 31,786,639  | A | G | 0.5594 | -0.0093 | 0.0011 |
| rs10124571  | 9  | 14,442,490  | T | C | 0.4014 | 0.0095  | 0.0011 |
| rs2430813   | 8  | 22,863,247  | T | C | 0.7693 | 0.0110  | 0.0012 |
| rs9317593   | 13 | 67,076,574  | A | G | 0.1478 | -0.0130 | 0.0015 |
| rs72674843  | 8  | 95,533,000  | T | C | 0.7511 | -0.0107 | 0.0012 |
| rs10180845  | 2  | 41,475,868  | T | C | 0.6343 | -0.0096 | 0.0011 |
| rs7628120   | 3  | 65,652,373  | T | C | 0.7023 | 0.0101  | 0.0011 |
| rs1079815   | 2  | 59,167,905  | T | C | 0.3166 | 0.0099  | 0.0011 |
| rs2561477   | 5  | 102,608,924 | A | G | 0.3171 | 0.0099  | 0.0011 |
| rs12448347  | 16 | 12,509,911  | A | G | 0.4637 | 0.0092  | 0.0010 |
| rs2517602   | 6  | 30,190,040  | T | C | 0.2988 | 0.0102  | 0.0012 |
| rs10809464  | 9  | 11,408,193  | A | T | 0.4624 | 0.0092  | 0.0010 |
| rs73219806  | 8  | 26,279,173  | A | C | 0.1664 | 0.0124  | 0.0014 |
| rs75624576  | 13 | 91,973,215  | T | G | 0.1004 | 0.0154  | 0.0017 |
| rs62257211  | 3  | 70,996,636  | T | C | 0.714  | -0.0102 | 0.0012 |
| rs10016110  | 4  | 45,968,561  | A | G | 0.3817 | 0.0095  | 0.0011 |
| rs117520996 | 19 | 4,410,003   | T | G | 0.049  | 0.0220  | 0.0025 |
| rs12438304  | 15 | 74,099,773  | T | C | 0.131  | 0.0136  | 0.0016 |
| rs115994176 | 9  | 81,540,704  | T | C | 0.6175 | -0.0109 | 0.0012 |
| rs13395080  | 2  | 229,100,197 | T | C | 0.6    | -0.0094 | 0.0011 |
| rs1851013   | 2  | 50,630,572  | T | C | 0.374  | -0.0095 | 0.0011 |
| rs4551987   | 15 | 93,475,558  | A | G | 0.8372 | 0.0125  | 0.0014 |
| rs4297478   | 11 | 120,435,854 | T | C | 0.5509 | -0.0092 | 0.0011 |
| rs1094181   | 2  | 57,758,135  | A | C | 0.3312 | 0.0097  | 0.0011 |
| rs7040930   | 9  | 14,214,720  | C | G | 0.572  | 0.0093  | 0.0011 |
| rs10786823  | 10 | 106,597,919 | C | G | 0.4732 | -0.0092 | 0.0010 |
| rs4211154   | 7  | 101,693,868 | C | G | 0.7745 | 0.0110  | 0.0013 |
| rs10752262  | 10 | 12,395,100  | T | C | 0.4177 | 0.0093  | 0.0011 |
| rs12743874  | 1  | 154,257,188 | A | T | 0.7183 | -0.0103 | 0.0012 |
| rs11982791  | 7  | 2,127,194   | A | C | 0.0528 | -0.0205 | 0.0023 |
| rs1581168   | 4  | 17,053,079  | T | C | 0.2879 | -0.0101 | 0.0012 |
| rs23766     | 1  | 94,032,097  | A | G | 0.2278 | -0.0109 | 0.0012 |
| rs12816396  | 12 | 123,009,498 | A | T | 0.8353 | -0.0123 | 0.0014 |
| rs73714120  | 7  | 104,421,249 | A | G | 0.2995 | 0.0100  | 0.0011 |
| rs4731413   | 7  | 127,836,132 | A | G | 0.2079 | 0.0113  | 0.0013 |
| rs9373363   | 6  | 143,150,043 | A | G | 0.7552 | -0.0106 | 0.0012 |
| rs17835368  | 3  | 78,444,548  | A | C | 0.3344 | 0.0097  | 0.0011 |
| rs9527905   | 13 | 59,403,033  | A | G | 0.5857 | -0.0093 | 0.0011 |
| rs77554090  | 3  | 65,711,935  | T | C | 0.0733 | -0.0175 | 0.0020 |
| rs75313851  | 2  | 44,591,972  | A | G | 0.0647 | -0.0185 | 0.0021 |
| rs1949197   | 3  | 86,273,850  | A | G | 0.3962 | -0.0093 | 0.0011 |
| rs114850916 | 3  | 126,975,479 | A | C | 0.0334 | 0.0256  | 0.0029 |
| rs73195104  | 4  | 3,444,690   | A | G | 0.1813 | 0.0119  | 0.0014 |
| rs8055522   | 16 | 1,244,380   | T | C | 0.3373 | 0.0098  | 0.0011 |
| rs11131601  | 4  | 66,450,520  | T | G | 0.4097 | 0.0093  | 0.0011 |
| rs876475    | 9  | 81,545,012  | A | G | 0.3937 | 0.0093  | 0.0011 |

|             |    |             |   |   |        |         |        |
|-------------|----|-------------|---|---|--------|---------|--------|
| rs7469569   | 9  | 139,926,402 | T | C | 0.3575 | 0.0095  | 0.0011 |
| rs10865834  | 3  | 31,599,298  | A | G | 0.2525 | -0.0105 | 0.0012 |
| rs145979116 | 2  | 220,412,282 | T | G | 0.9788 | -0.0322 | 0.0037 |
| rs2250660   | 2  | 233,752,551 | C | G | 0.5051 | 0.0091  | 0.0010 |
| rs2006853   | 8  | 127,600,255 | A | G | 0.5875 | 0.0092  | 0.0011 |
| rs4751360   | 10 | 133,097,784 | T | C | 0.4725 | 0.0091  | 0.0010 |
| rs10835389  | 11 | 28,676,505  | T | C | 0.6491 | -0.0095 | 0.0011 |
| rs4894651   | 3  | 173,912,821 | T | C | 0.4397 | 0.0091  | 0.0011 |
| rs7039819   | 9  | 82,430,418  | A | G | 0.5813 | 0.0092  | 0.0011 |
| rs7263949   | 20 | 43,690,561  | C | G | 0.6923 | 0.0098  | 0.0011 |
| rs17038608  | 2  | 49,594,303  | A | G | 0.9144 | 0.0162  | 0.0019 |
| rs2288004   | 16 | 31,054,040  | C | G | 0.3936 | 0.0093  | 0.0011 |
| rs35375125  | 1  | 169,248,652 | T | C | 0.6453 | -0.0095 | 0.0011 |
| rs2195086   | 2  | 60,814,466  | T | G | 0.8447 | 0.0125  | 0.0014 |
| rs7580777   | 2  | 50,695,601  | T | G | 0.5977 | 0.0092  | 0.0011 |
| rs2017850   | 1  | 151,715,279 | T | C | 0.3475 | 0.0095  | 0.0011 |
| rs11755241  | 6  | 111,061,814 | T | C | 0.1923 | -0.0116 | 0.0013 |
| rs113746524 | 2  | 60,977,295  | T | G | 0.0233 | 0.0300  | 0.0035 |
| rs6030819   | 20 | 42,016,041  | A | T | 0.1958 | -0.0114 | 0.0013 |
| rs56122560  | 3  | 50,316,007  | T | G | 0.8937 | -0.0162 | 0.0019 |
| rs79798166  | 5  | 59,152,140  | A | G | 0.086  | 0.0161  | 0.0019 |
| rs715694    | 15 | 47,489,021  | A | G | 0.6196 | 0.0093  | 0.0011 |
| rs6141759   | 20 | 31,177,292  | A | G | 0.2372 | -0.0106 | 0.0012 |
| rs1361975   | 7  | 126,560,441 | A | C | 0.6478 | 0.0094  | 0.0011 |
| rs72779695  | 2  | 12,797,853  | T | C | 0.1181 | -0.0140 | 0.0016 |
| rs12746551  | 1  | 114,374,966 | C | G | 0.969  | 0.0261  | 0.0030 |
| rs1447200   | 2  | 143,334,059 | A | C | 0.4944 | 0.0090  | 0.0010 |
| rs9410471   | 9  | 91,902,166  | A | G | 0.1047 | -0.0147 | 0.0017 |
| rs6466499   | 7  | 114,493,274 | A | G | 0.2006 | -0.0113 | 0.0013 |
| rs7254263   | 19 | 30,741,257  | T | C | 0.2899 | -0.0099 | 0.0012 |
| rs111915841 | 2  | 225,467,840 | C | G | 0.3327 | 0.0095  | 0.0011 |
| rs16966271  | 15 | 38,423,730  | T | C | 0.2831 | 0.0100  | 0.0012 |
| rs10481106  | 8  | 107,599,471 | A | G | 0.1566 | -0.0124 | 0.0014 |
| rs13212041  | 6  | 78,171,124  | T | C | 0.7995 | 0.0112  | 0.0013 |
| rs7845971   | 8  | 93,022,095  | A | T | 0.2226 | -0.0108 | 0.0013 |
| rs860326    | 14 | 57,342,912  | T | C | 0.5679 | 0.0091  | 0.0011 |
| rs73210523  | 3  | 196,876,600 | A | G | 0.1741 | 0.0118  | 0.0014 |
| rs12627339  | 21 | 34,279,201  | A | T | 0.6982 | 0.0098  | 0.0011 |
| rs17468213  | 18 | 25,594,931  | A | T | 0.2756 | 0.0100  | 0.0012 |
| rs77702819  | 2  | 101,328,728 | T | G | 0.0895 | 0.0158  | 0.0018 |
| rs4793084   | 17 | 42,317,371  | T | G | 0.6939 | -0.0097 | 0.0011 |
| rs1527683   | 1  | 74,822,937  | T | C | 0.7969 | -0.0111 | 0.0013 |
| rs337939    | 13 | 71,257,303  | T | C | 0.5761 | 0.0091  | 0.0011 |
| rs9317202   | 13 | 62,355,464  | T | C | 0.7027 | 0.0098  | 0.0011 |
| rs9266319   | 6  | 31,330,345  | A | T | 0.8075 | 0.0114  | 0.0013 |
| rs60053512  | 17 | 60,095,315  | A | G | 0.1559 | 0.0123  | 0.0014 |
| rs73516862  | 11 | 68,245,648  | T | C | 0.7296 | 0.0101  | 0.0012 |
| rs1493921   | 18 | 31,451,052  | T | C | 0.3836 | 0.0092  | 0.0011 |

|             |    |             |   |   |        |         |        |
|-------------|----|-------------|---|---|--------|---------|--------|
| rs6445633   | 3  | 54,230,638  | A | C | 0.3113 | 0.0096  | 0.0011 |
| rs6432626   | 2  | 161,375,040 | T | C | 0.4604 | 0.0090  | 0.0011 |
| rs10763979  | 10 | 34,602,764  | A | G | 0.6215 | 0.0092  | 0.0011 |
| rs3740484   | 10 | 102,747,363 | T | G | 0.3153 | 0.0096  | 0.0011 |
| rs6504875   | 17 | 52,098,609  | T | G | 0.5581 | 0.0090  | 0.0011 |
| rs35041900  | 1  | 171,451,621 | T | C | 0.0907 | -0.0155 | 0.0018 |
| rs9884603   | 4  | 27,991,354  | T | C | 0.647  | 0.0093  | 0.0011 |
| rs6563363   | 13 | 84,307,786  | T | G | 0.3732 | -0.0092 | 0.0011 |
| rs11159067  | 14 | 74,637,444  | A | G | 0.6722 | 0.0095  | 0.0011 |
| rs6093705   | 20 | 41,257,630  | A | C | 0.6805 | 0.0095  | 0.0011 |
| rs11877152  | 18 | 42,754,468  | T | C | 0.8905 | -0.0143 | 0.0017 |
| rs116075459 | 12 | 106,807,888 | A | C | 0.7818 | 0.0124  | 0.0015 |
| rs10040219  | 5  | 104,105,309 | T | C | 0.7182 | -0.0099 | 0.0012 |
| rs2593017   | 9  | 88,010,680  | A | T | 0.8487 | -0.0124 | 0.0015 |
| rs57985238  | 16 | 83,608,565  | C | G | 0.603  | -0.0091 | 0.0011 |
| rs1171150   | 1  | 190,366,496 | T | C | 0.3735 | 0.0092  | 0.0011 |
| rs113919848 | 3  | 86,145,281  | A | T | 0.0579 | 0.0191  | 0.0023 |
| rs4685405   | 3  | 16,981,683  | T | G | 0.185  | -0.0114 | 0.0013 |
| rs2172122   | 3  | 56,576,175  | C | G | 0.361  | -0.0092 | 0.0011 |
| rs34885384  | 2  | 100,526,438 | T | C | 0.8301 | -0.0119 | 0.0014 |
| rs10805248  | 4  | 23,755,141  | A | G | 0.825  | -0.0117 | 0.0014 |
| rs10928190  | 2  | 144,376,033 | T | C | 0.4461 | -0.0089 | 0.0011 |
| rs10896636  | 11 | 57,448,032  | C | G | 0.6588 | 0.0094  | 0.0011 |
| rs2447091   | 17 | 2,296,014   | T | C | 0.6112 | 0.0091  | 0.0011 |
| rs611517    | 18 | 77,554,063  | C | G | 0.2057 | 0.0110  | 0.0013 |
| rs12596890  | 16 | 3,588,068   | A | G | 0.7984 | 0.0110  | 0.0013 |
| rs4561398   | 15 | 55,932,617  | T | C | 0.485  | -0.0089 | 0.0010 |
| rs12928099  | 16 | 15,150,505  | A | C | 0.2974 | 0.0097  | 0.0011 |
| rs7847405   | 9  | 102,213,749 | T | G | 0.6495 | 0.0093  | 0.0011 |
| rs11681287  | 2  | 215,295,184 | A | G | 0.1456 | 0.0126  | 0.0015 |
| rs10111852  | 8  | 141,937,541 | T | C | 0.4949 | -0.0089 | 0.0010 |
| rs3121984   | 1  | 112,815,880 | T | C | 0.69   | 0.0096  | 0.0011 |
| rs12581070  | 12 | 61,060,692  | T | C | 0.1419 | 0.0127  | 0.0015 |
| rs78365243  | 1  | 211,737,950 | T | C | 0.9535 | 0.0211  | 0.0025 |
| rs10151339  | 14 | 60,813,416  | T | G | 0.3172 | 0.0095  | 0.0011 |
| rs806180    | 7  | 127,283,699 | T | C | 0.3826 | -0.0091 | 0.0011 |
| rs12134760  | 1  | 61,803,341  | A | C | 0.1392 | 0.0128  | 0.0015 |
| rs10014934  | 4  | 137,526,995 | T | C | 0.6251 | 0.0091  | 0.0011 |
| rs9930253   | 16 | 5,815,334   | A | T | 0.2786 | -0.0099 | 0.0012 |
| rs35583726  | 9  | 8,533,697   | A | G | 0.8334 | 0.0119  | 0.0014 |
| rs4663617   | 2  | 236,744,626 | A | T | 0.2399 | 0.0104  | 0.0012 |
| rs2970991   | 2  | 101,322,193 | C | G | 0.5246 | 0.0088  | 0.0010 |
| rs115438240 | 2  | 185,883,877 | T | G | 0.941  | -0.0187 | 0.0022 |
| rs707917    | 6  | 31,657,754  | C | G | 0.737  | 0.0101  | 0.0012 |
| rs628720    | 1  | 241,806,189 | T | C | 0.634  | -0.0091 | 0.0011 |
| rs61991641  | 14 | 77,502,798  | T | C | 0.3456 | -0.0093 | 0.0011 |
| rs11623285  | 14 | 24,557,642  | T | G | 0.8654 | -0.0130 | 0.0015 |
| rs72751302  | 15 | 96,910,355  | A | G | 0.2027 | 0.0110  | 0.0013 |

|             |    |             |   |   |        |         |        |
|-------------|----|-------------|---|---|--------|---------|--------|
| rs2059475   | 15 | 47,781,093  | A | G | 0.6883 | -0.0095 | 0.0011 |
| rs60096640  | 6  | 27,636,313  | A | G | 0.8937 | 0.0143  | 0.0017 |
| rs251848    | 5  | 176,492,557 | A | G | 0.4927 | -0.0088 | 0.0010 |
| rs34397560  | 2  | 174,155,967 | A | G | 0.4021 | 0.0090  | 0.0011 |
| rs730384    | 14 | 74,889,870  | A | G | 0.4364 | 0.0089  | 0.0011 |
| rs34074136  | 14 | 41,095,960  | T | C | 0.7765 | 0.0106  | 0.0013 |
| rs1297621   | 7  | 101,890,901 | T | C | 0.4    | 0.0090  | 0.0011 |
| rs7173089   | 15 | 92,438,457  | T | C | 0.3891 | -0.0090 | 0.0011 |
| rs202224508 | 20 | 31,342,066  | T | C | 0.2304 | -0.0121 | 0.0014 |
| rs13252156  | 8  | 15,242,899  | A | C | 0.4    | 0.0090  | 0.0011 |
| rs1539414   | 1  | 197,743,506 | A | G | 0.2121 | -0.0107 | 0.0013 |
| rs827951    | 6  | 158,855,387 | A | G | 0.731  | -0.0099 | 0.0012 |
| rs6717900   | 2  | 34,386,394  | A | G | 0.3677 | 0.0091  | 0.0011 |
| rs12814006  | 12 | 122,154,617 | T | C | 0.5259 | 0.0088  | 0.0010 |
| rs13278836  | 8  | 120,215,797 | A | G | 0.1155 | 0.0137  | 0.0016 |
| rs60613433  | 5  | 65,969,162  | A | G | 0.0962 | 0.0149  | 0.0018 |
| rs10514891  | 5  | 59,583,170  | A | G | 0.8832 | 0.0137  | 0.0016 |
| rs1152595   | 14 | 64,674,981  | T | C | 0.5382 | -0.0088 | 0.0010 |
| rs7875078   | 9  | 14,494,845  | A | C | 0.4609 | -0.0088 | 0.0011 |
| rs12431576  | 14 | 57,287,964  | T | C | 0.6697 | -0.0093 | 0.0011 |
| rs6866245   | 5  | 57,110,963  | A | G | 0.6149 | -0.0090 | 0.0011 |
| rs13155210  | 5  | 167,534,296 | T | C | 0.4434 | 0.0088  | 0.0011 |
| rs17126938  | 10 | 111,761,351 | T | C | 0.8604 | -0.0126 | 0.0015 |
| rs1527878   | 2  | 183,446,535 | A | G | 0.7522 | -0.0101 | 0.0012 |
| rs11192507  | 10 | 107,340,162 | A | G | 0.5887 | -0.0089 | 0.0011 |
| rs79073127  | 2  | 48,573,895  | C | G | 0.1204 | -0.0135 | 0.0016 |
| rs77899607  | 10 | 68,691,900  | T | C | 0.13   | 0.0131  | 0.0016 |
| rs12692596  | 2  | 161,265,910 | T | C | 0.3655 | -0.0091 | 0.0011 |
| rs10895719  | 11 | 104,563,483 | T | C | 0.7871 | -0.0107 | 0.0013 |
| rs981949    | 3  | 161,196,597 | A | C | 0.675  | 0.0093  | 0.0011 |
| rs60307735  | 3  | 8,249,587   | T | C | 0.3395 | 0.0092  | 0.0011 |
| rs12713018  | 2  | 49,094,244  | A | C | 0.6027 | -0.0089 | 0.0011 |
| rs7320982   | 13 | 92,019,926  | T | C | 0.7684 | 0.0104  | 0.0012 |
| rs62409395  | 4  | 25,605,036  | T | C | 0.7618 | 0.0106  | 0.0013 |
| rs13133213  | 4  | 15,646,794  | A | G | 0.4994 | 0.0087  | 0.0010 |
| rs321250    | 1  | 96,470,547  | T | G | 0.4225 | -0.0088 | 0.0011 |
| rs72748123  | 5  | 52,799,806  | A | G | 0.1635 | -0.0118 | 0.0014 |
| rs10456918  | 6  | 119,233,480 | A | C | 0.8293 | -0.0116 | 0.0014 |
| rs16983844  | 20 | 62,225,508  | A | G | 0.2089 | 0.0107  | 0.0013 |
| rs28360512  | 6  | 108,037,863 | A | G | 0.35   | -0.0091 | 0.0011 |
| rs111362982 | 7  | 3,683,306   | T | C | 0.8725 | -0.0131 | 0.0016 |
| rs72838750  | 17 | 16,242,993  | T | G | 0.4944 | -0.0088 | 0.0011 |
| rs1031831   | 18 | 53,347,258  | A | C | 0.3375 | -0.0092 | 0.0011 |
| rs1004787   | 2  | 45,159,091  | A | G | 0.5525 | -0.0088 | 0.0011 |
| rs143699161 | 17 | 43,748,712  | A | G | 0.7543 | -0.0103 | 0.0012 |
| rs1972863   | 4  | 94,579,511  | A | G | 0.3049 | -0.0095 | 0.0011 |
| rs12113634  | 7  | 111,996,952 | T | C | 0.6426 | 0.0091  | 0.0011 |
| rs12494424  | 3  | 70,520,917  | C | G | 0.0403 | -0.0223 | 0.0027 |

|             |    |             |   |   |        |         |        |
|-------------|----|-------------|---|---|--------|---------|--------|
| rs192436652 | 19 | 54,960,747  | T | C | 0.0262 | -0.0276 | 0.0033 |
| rs1144127   | 3  | 100,482,076 | A | G | 0.4486 | -0.0087 | 0.0011 |
| rs141874682 | 2  | 5,836,918   | T | C | 0.0319 | -0.0249 | 0.0030 |
| rs4440553   | 7  | 128,391,434 | T | C | 0.829  | 0.0116  | 0.0014 |
| rs10772644  | 12 | 13,417,617  | C | G | 0.8916 | 0.0140  | 0.0017 |
| rs4851263   | 2  | 100,801,867 | A | G | 0.1027 | -0.0143 | 0.0017 |
| rs11218422  | 11 | 98,982,974  | T | C | 0.5793 | 0.0088  | 0.0011 |
| rs112780312 | 1  | 153,797,015 | A | G | 0.2863 | -0.0096 | 0.0012 |
| rs35797585  | 10 | 10,250,793  | A | G | 0.2448 | -0.0102 | 0.0012 |
| rs73002120  | 1  | 118,091,602 | A | C | 0.1753 | 0.0114  | 0.0014 |
| rs2919151   | 2  | 174,193,639 | T | G | 0.4865 | 0.0087  | 0.0010 |
| rs515513    | 1  | 244,448,353 | A | C | 0.5332 | -0.0087 | 0.0011 |
| rs1475550   | 13 | 107,592,100 | A | G | 0.6828 | -0.0093 | 0.0011 |
| rs7333511   | 13 | 60,783,328  | A | T | 0.6332 | 0.0090  | 0.0011 |
| rs72673939  | 8  | 118,867,693 | C | G | 0.1885 | -0.0111 | 0.0013 |
| rs1121840   | 5  | 106,685,840 | T | C | 0.7754 | 0.0104  | 0.0013 |
| rs9268544   | 6  | 32,385,453  | A | G | 0.3855 | -0.0090 | 0.0011 |
| rs4785819   | 16 | 65,307,151  | T | C | 0.8991 | -0.0144 | 0.0017 |
| rs10259526  | 7  | 91,576,824  | T | G | 0.6117 | -0.0089 | 0.0011 |
| rs58859557  | 1  | 44,010,456  | T | C | 0.0668 | 0.0175  | 0.0021 |
| rs6575340   | 14 | 94,023,972  | A | G | 0.64   | -0.0090 | 0.0011 |
| rs58130172  | 1  | 11,540,649  | T | C | 0.278  | 0.0098  | 0.0012 |
| rs17257579  | 13 | 38,176,607  | T | C | 0.8755 | -0.0131 | 0.0016 |
| rs10230652  | 7  | 132,697,829 | T | C | 0.3114 | 0.0093  | 0.0011 |
| rs62082230  | 18 | 22,676,071  | A | T | 0.2753 | -0.0097 | 0.0012 |
| rs17183201  | 14 | 75,288,697  | T | G | 0.9262 | 0.0166  | 0.0020 |
| rs11724690  | 4  | 186,764,747 | T | G | 0.2939 | 0.0095  | 0.0011 |
| rs12957987  | 18 | 31,212,209  | A | G | 0.4783 | 0.0087  | 0.0010 |
| rs67654519  | 2  | 155,477,258 | T | C | 0.4885 | -0.0086 | 0.0010 |
| rs7803932   | 7  | 70,203,673  | A | G | 0.163  | 0.0117  | 0.0014 |
| rs2718772   | 3  | 180,943,426 | A | G | 0.6442 | -0.0090 | 0.0011 |
| rs3751837   | 16 | 3,583,173   | T | C | 0.2217 | 0.0104  | 0.0013 |
| rs546481    | 1  | 234,859,883 | A | G | 0.1237 | -0.0133 | 0.0016 |
| rs1402954   | 11 | 33,777,334  | T | C | 0.0966 | 0.0146  | 0.0018 |
| rs7571708   | 2  | 236,832,573 | A | G | 0.6329 | 0.0089  | 0.0011 |
| rs6808671   | 3  | 58,231,112  | T | C | 0.368  | -0.0089 | 0.0011 |
| rs7336670   | 13 | 54,199,624  | A | C | 0.2144 | 0.0105  | 0.0013 |
| rs7313056   | 12 | 109,871,458 | T | C | 0.5289 | 0.0086  | 0.0010 |
| rs4400723   | 10 | 107,107,903 | T | C | 0.2542 | -0.0099 | 0.0012 |
| rs34045986  | 2  | 61,688,489  | T | C | 0.7811 | -0.0104 | 0.0013 |
| rs9565961   | 13 | 85,245,931  | T | C | 0.1569 | -0.0118 | 0.0014 |
| rs13281878  | 8  | 93,318,607  | T | C | 0.2658 | 0.0097  | 0.0012 |
| rs17266097  | 2  | 200,275,209 | T | C | 0.3984 | 0.0088  | 0.0011 |
| rs12085418  | 1  | 72,553,891  | T | G | 0.4893 | -0.0086 | 0.0010 |
| rs77128898  | 11 | 61,313,525  | T | C | 0.0334 | -0.0242 | 0.0029 |
| rs16917562  | 8  | 53,162,201  | A | T | 0.8844 | -0.0135 | 0.0016 |
| rs13021827  | 2  | 57,876,873  | T | C | 0.775  | 0.0103  | 0.0013 |
| rs283272    | 20 | 53,532,627  | T | C | 0.3179 | -0.0092 | 0.0011 |

|             |    |             |   |   |        |         |        |
|-------------|----|-------------|---|---|--------|---------|--------|
| rs971136    | 22 | 48,438,408  | A | G | 0.622  | -0.0089 | 0.0011 |
| rs11138947  | 9  | 72,110,562  | T | C | 0.7208 | 0.0096  | 0.0012 |
| rs10886010  | 10 | 118,546,590 | A | G | 0.42   | -0.0087 | 0.0011 |
| rs2174752   | 13 | 69,332,015  | T | G | 0.4534 | -0.0086 | 0.0011 |
| rs11690172  | 2  | 57,387,094  | A | G | 0.5997 | 0.0088  | 0.0011 |
| rs11158200  | 14 | 58,649,843  | A | G | 0.5367 | 0.0086  | 0.0011 |
| rs113473640 | 12 | 120,877,165 | A | G | 0.9834 | -0.0338 | 0.0041 |
| rs34967558  | 2  | 157,490,241 | T | C | 0.764  | -0.0101 | 0.0012 |
| rs1980099   | 8  | 9,686,297   | A | G | 0.8166 | 0.0111  | 0.0014 |
| rs3757479   | 7  | 5,761,191   | C | G | 0.486  | 0.0086  | 0.0010 |
| rs3800311   | 6  | 27,210,585  | A | G | 0.8509 | 0.0120  | 0.0015 |
| rs1375013   | 11 | 121,808,868 | T | C | 0.6752 | -0.0092 | 0.0011 |
| rs3863241   | 8  | 73,890,335  | T | C | 0.5411 | -0.0086 | 0.0011 |
| rs1427298   | 2  | 145,214,421 | T | C | 0.4237 | 0.0087  | 0.0011 |
| rs11703948  | 22 | 38,817,047  | A | G | 0.9047 | -0.0146 | 0.0018 |
| rs2239736   | 4  | 2,438,929   | T | C | 0.5098 | 0.0086  | 0.0010 |
| rs17224289  | 8  | 74,703,133  | T | C | 0.1197 | -0.0132 | 0.0016 |
| rs4667489   | 2  | 166,396,406 | T | C | 0.5694 | 0.0086  | 0.0011 |
| rs7698820   | 4  | 67,084,168  | T | C | 0.2934 | -0.0094 | 0.0011 |
| rs9481398   | 6  | 114,098,094 | T | C | 0.4932 | -0.0085 | 0.0010 |
| rs17190418  | 13 | 58,746,132  | T | C | 0.0535 | -0.0218 | 0.0027 |
| rs1134777   | 10 | 75,538,651  | C | G | 0.7507 | -0.0099 | 0.0012 |
| rs12974657  | 19 | 18,237,571  | T | C | 0.6826 | 0.0092  | 0.0011 |
| rs1647267   | 2  | 27,651,054  | A | T | 0.62   | 0.0088  | 0.0011 |
| rs886942    | 12 | 1,964,885   | T | C | 0.8747 | -0.0129 | 0.0016 |
| rs4141463   | 20 | 14,747,471  | T | C | 0.4176 | -0.0086 | 0.0011 |
| rs11886336  | 2  | 186,480,090 | A | G | 0.5781 | 0.0086  | 0.0011 |
| rs34321532  | 16 | 12,118,260  | C | G | 0.5057 | 0.0085  | 0.0010 |
| rs3811038   | 2  | 113,240,183 | T | C | 0.7214 | 0.0095  | 0.0012 |
| rs77882218  | 18 | 53,415,063  | T | C | 0.9716 | -0.0256 | 0.0032 |
| rs7126413   | 11 | 120,207,405 | A | G | 0.6182 | 0.0088  | 0.0011 |
| rs11208757  | 1  | 66,269,936  | T | C | 0.188  | -0.0109 | 0.0013 |
| rs2303907   | 2  | 73,470,497  | T | C | 0.5239 | 0.0085  | 0.0010 |
| rs1107871   | 12 | 132,240,659 | A | G | 0.552  | -0.0086 | 0.0011 |
| rs112209391 | 11 | 79,151,784  | T | C | 0.1044 | 0.0139  | 0.0017 |
| rs2633723   | 3  | 53,754,418  | T | C | 0.6118 | 0.0087  | 0.0011 |
| rs4766975   | 12 | 121,069,126 | A | G | 0.6089 | -0.0087 | 0.0011 |
| rs6465603   | 7  | 97,289,046  | A | G | 0.1809 | 0.0110  | 0.0014 |
| rs10791303  | 11 | 133,531,999 | T | C | 0.6202 | 0.0088  | 0.0011 |
| rs35414759  | 10 | 10,906,047  | T | C | 0.8149 | -0.0109 | 0.0013 |
| rs4851317   | 2  | 101,054,149 | T | G | 0.3082 | -0.0092 | 0.0011 |
| rs72819955  | 10 | 107,051,384 | T | C | 0.0303 | -0.0248 | 0.0031 |
| rs72906124  | 2  | 157,076,201 | T | C | 0.9433 | 0.0184  | 0.0023 |
| rs200701118 | 7  | 100,026,421 | T | G | 0.0627 | -0.0185 | 0.0023 |
| rs12916023  | 15 | 61,456,053  | A | G | 0.4908 | -0.0085 | 0.0010 |
| rs72771860  | 5  | 87,974,682  | T | G | 0.0683 | -0.0171 | 0.0021 |
| rs1330936   | 9  | 23,362,300  | A | G | 0.2823 | -0.0190 | 0.0023 |
| rs62142894  | 2  | 51,539,442  | T | C | 0.2615 | 0.0097  | 0.0012 |



|            |    |             |   |   |        |         |        |
|------------|----|-------------|---|---|--------|---------|--------|
| rs9409514  | 9  | 97,065,439  | T | C | 0.3499 | -0.0089 | 0.0011 |
| rs6698015  | 1  | 58,265,352  | T | C | 0.6141 | 0.0087  | 0.0011 |
| rs481998   | 5  | 176,169,058 | A | T | 0.4449 | 0.0086  | 0.0011 |
| rs7151326  | 14 | 86,387,845  | T | G | 0.3944 | -0.0087 | 0.0011 |
| rs561655   | 11 | 85,800,279  | A | G | 0.6553 | -0.0089 | 0.0011 |
| rs7793929  | 7  | 855,076     | A | T | 0.6562 | -0.0103 | 0.0013 |
| rs1971218  | 2  | 221,835,288 | A | G | 0.5241 | 0.0085  | 0.0011 |
| rs77187837 | 13 | 54,086,522  | T | C | 0.1223 | 0.0129  | 0.0016 |
| rs76957677 | 10 | 105,030,157 | T | C | 0.02   | -0.0309 | 0.0038 |
| rs2488697  | 10 | 77,054,052  | T | C | 0.2711 | -0.0095 | 0.0012 |
| rs9569211  | 13 | 55,710,879  | A | T | 0.3532 | 0.0089  | 0.0011 |
| rs36033348 | 14 | 98,438,791  | T | C | 0.907  | -0.0146 | 0.0018 |
| rs12524795 | 6  | 3,464,074   | T | C | 0.4448 | 0.0085  | 0.0011 |
| rs11019128 | 11 | 90,393,587  | T | C | 0.3824 | -0.0087 | 0.0011 |
| rs592931   | 11 | 61,496,751  | T | C | 0.3607 | 0.0088  | 0.0011 |
| rs4650228  | 1  | 74,239,827  | A | G | 0.4639 | -0.0085 | 0.0010 |
| rs80041551 | 18 | 37,021,014  | A | G | 0.0465 | 0.0201  | 0.0025 |
| rs4980376  | 6  | 16,924,274  | T | C | 0.2468 | -0.0098 | 0.0012 |
| rs9516771  | 13 | 97,484,830  | A | G | 0.9372 | -0.0174 | 0.0022 |
| rs631287   | 9  | 128,412,676 | A | G | 0.5583 | 0.0085  | 0.0011 |
| rs2098432  | 12 | 107,677,693 | A | G | 0.3665 | -0.0088 | 0.0011 |
| rs7812747  | 8  | 77,366,932  | A | G | 0.5697 | -0.0085 | 0.0011 |
| rs10890995 | 11 | 109,327,622 | A | G | 0.2999 | -0.0092 | 0.0011 |
| rs62199988 | 2  | 186,110,190 | C | G | 0.6045 | -0.0086 | 0.0011 |
| rs1841023  | 4  | 163,735,584 | A | C | 0.6892 | -0.0091 | 0.0011 |
| rs56215322 | 6  | 152,187,758 | T | C | 0.1698 | -0.0113 | 0.0014 |
| rs10465817 | 1  | 73,975,686  | A | C | 0.3927 | -0.0086 | 0.0011 |
| rs137121   | 22 | 43,013,554  | T | C | 0.127  | 0.0127  | 0.0016 |
| rs11798079 | 6  | 98,664,910  | A | G | 0.9493 | -0.0195 | 0.0024 |
| rs7924465  | 11 | 132,636,983 | T | C | 0.9068 | 0.0145  | 0.0018 |
| rs708912   | 20 | 8,403,550   | T | C | 0.7921 | 0.0104  | 0.0013 |
| rs110662   | 6  | 33,172,932  | A | G | 0.7258 | -0.0094 | 0.0012 |
| rs6035413  | 20 | 19,674,512  | A | T | 0.6516 | -0.0088 | 0.0011 |
| rs14515582 | 1  | 44,165,646  | T | C | 0.0424 | 0.0215  | 0.0027 |
| rs3817741  | 6  | 13,279,507  | A | G | 0.1867 | -0.0108 | 0.0013 |
| rs11752019 | 11 | 2,212,843   | A | G | 0.1911 | 0.0107  | 0.0013 |
| rs13296345 | 9  | 14,791,348  | T | C | 0.6249 | 0.0087  | 0.0011 |
| rs1154780  | 7  | 78,161,376  | A | G | 0.5444 | 0.0084  | 0.0011 |
| rs79575945 | 6  | 152,158,847 | A | G | 0.9104 | -0.0147 | 0.0018 |
| rs3869097  | 6  | 30,984,470  | T | C | 0.326  | -0.0090 | 0.0011 |
| rs7827631  | 8  | 143,490,876 | T | C | 0.8293 | -0.0112 | 0.0014 |
| rs2210054  | 14 | 34,022,139  | A | G | 0.5825 | 0.0085  | 0.0011 |
| rs78278641 | 11 | 62,413,662  | T | C | 0.1373 | 0.0122  | 0.0015 |
| rs895204   | 11 | 70,662,057  | A | G | 0.133  | -0.0123 | 0.0015 |
| rs9886703  | 9  | 82,246,351  | A | T | 0.1671 | -0.0112 | 0.0014 |
| rs11380154 | 6  | 71,221,537  | A | G | 0.9872 | -0.0375 | 0.0047 |
| rs78116078 | 1  | 18,434,125  | C | G | 0.7184 | 0.0093  | 0.0012 |
| rs55851717 | 8  | 30,919,595  | A | G | 0.7498 | 0.0097  | 0.0012 |

|             |    |             |   |   |        |         |        |
|-------------|----|-------------|---|---|--------|---------|--------|
| rs57957741  | 4  | 103,164,166 | A | G | 0.5209 | 0.0084  | 0.0010 |
| rs61902856  | 11 | 113,472,313 | T | C | 0.2799 | -0.0093 | 0.0012 |
| rs1480582   | 2  | 161,606,179 | A | T | 0.5    | 0.0084  | 0.0010 |
| rs12120654  | 1  | 74,235,594  | A | G | 0.0991 | 0.0141  | 0.0018 |
| rs895960    | 12 | 122,346,052 | A | G | 0.2016 | -0.0104 | 0.0013 |
| rs9827101   | 3  | 131,734,203 | A | C | 0.5282 | -0.0084 | 0.0010 |
| rs74532781  | 9  | 130,979,716 | A | G | 0.1436 | -0.0119 | 0.0015 |
| rs13026625  | 2  | 141,949,960 | T | C | 0.4703 | 0.0084  | 0.0010 |
| rs7600039   | 2  | 58,076,075  | T | C | 0.0797 | -0.0154 | 0.0019 |
| rs17426562  | 1  | 97,036,113  | A | G | 0.0646 | 0.0170  | 0.0021 |
| rs560701    | 6  | 93,841,742  | A | G | 0.7005 | 0.0092  | 0.0011 |
| rs9267812   | 6  | 32,128,394  | T | C | 0.1338 | -0.0123 | 0.0015 |
| rs1369633   | 15 | 47,886,974  | A | C | 0.1748 | -0.0110 | 0.0014 |
| rs1193240   | 1  | 7,525,982   | A | C | 0.4107 | 0.0085  | 0.0011 |
| rs9381086   | 6  | 41,580,073  | C | G | 0.4002 | -0.0085 | 0.0011 |
| rs7035315   | 9  | 83,231,511  | A | G | 0.6281 | -0.0086 | 0.0011 |
| rs62189004  | 2  | 162,549,747 | T | C | 0.9768 | -0.0284 | 0.0036 |
| rs6864049   | 5  | 124,330,522 | A | G | 0.4706 | 0.0083  | 0.0010 |
| rs7280000   | 21 | 39,598,054  | C | G | 0.4172 | 0.0084  | 0.0011 |
| rs7640269   | 3  | 71,475,572  | A | G | 0.7249 | 0.0093  | 0.0012 |
| rs7549469   | 1  | 107,304,576 | A | T | 0.6796 | 0.0089  | 0.0011 |
| rs6534704   | 4  | 129,757,825 | A | T | 0.0842 | -0.0150 | 0.0019 |
| rs5759002   | 22 | 43,263,432  | A | G | 0.4878 | 0.0083  | 0.0010 |
| rs77702622  | 8  | 143,367,857 | A | G | 0.0612 | -0.0174 | 0.0022 |
| rs6063897   | 20 | 51,606,879  | C | G | 0.2431 | -0.0097 | 0.0012 |
| rs6503409   | 17 | 43,058,742  | T | C | 0.3392 | 0.0088  | 0.0011 |
| rs72819942  | 10 | 107,034,723 | T | C | 0.0914 | 0.0144  | 0.0018 |
| rs1871745   | 8  | 106,457,633 | A | G | 0.7901 | 0.0102  | 0.0013 |
| rs13073489  | 3  | 77,257,303  | A | G | 0.7401 | -0.0095 | 0.0012 |
| rs12793370  | 11 | 122,080,117 | T | C | 0.7756 | -0.0099 | 0.0013 |
| rs7597126   | 2  | 215,009,358 | T | C | 0.4971 | -0.0083 | 0.0010 |
| rs67224963  | 5  | 63,787,810  | A | G | 0.2044 | 0.0103  | 0.0013 |
| rs58101352  | 2  | 140,277,226 | A | G | 0.9792 | -0.0291 | 0.0037 |
| rs13161488  | 5  | 145,572,664 | T | C | 0.648  | -0.0087 | 0.0011 |
| rs9682904   | 3  | 68,793,738  | T | C | 0.3846 | 0.0085  | 0.0011 |
| rs1055797   | 8  | 95,523,233  | T | G | 0.2485 | 0.0105  | 0.0013 |
| rs12507497  | 4  | 164,895,662 | A | G | 0.6417 | -0.0086 | 0.0011 |
| rs11130296  | 3  | 51,812,952  | T | C | 0.2776 | -0.0093 | 0.0012 |
| rs6731373   | 2  | 68,503,044  | A | G | 0.3456 | -0.0087 | 0.0011 |
| rs12820589  | 12 | 31,797,673  | A | G | 0.7831 | -0.0100 | 0.0013 |
| rs114192810 | 4  | 17,969,142  | T | G | 0.981  | -0.0304 | 0.0038 |
| rs12045428  | 1  | 210,351,222 | A | C | 0.1881 | -0.0106 | 0.0013 |
| rs17361576  | 4  | 184,792,187 | A | C | 0.4114 | 0.0084  | 0.0011 |
| rs1630579   | 12 | 120,850,751 | T | C | 0.781  | -0.0100 | 0.0013 |
| rs4859144   | 3  | 182,624,759 | T | C | 0.33   | 0.0088  | 0.0011 |
| rs7109373   | 11 | 39,928,045  | A | T | 0.804  | 0.0104  | 0.0013 |
| rs2421694   | 10 | 93,516,104  | A | G | 0.5686 | -0.0083 | 0.0011 |
| rs1910005   | 5  | 81,110,866  | T | C | 0.7124 | -0.0091 | 0.0012 |

|             |    |             |   |   |        |         |        |
|-------------|----|-------------|---|---|--------|---------|--------|
| rs9555651   | 13 | 110,587,023 | T | C | 0.1673 | 0.0111  | 0.0014 |
| rs3103307   | 17 | 28,660,487  | A | T | 0.5841 | -0.0084 | 0.0011 |
| rs10764493  | 10 | 18,727,999  | A | G | 0.8892 | 0.0132  | 0.0017 |
| rs4678463   | 3  | 34,270,633  | T | G | 0.2518 | -0.0095 | 0.0012 |
| rs7628995   | 3  | 68,323,423  | A | G | 0.656  | 0.0087  | 0.0011 |
| rs1448355   | 11 | 131,286,685 | T | C | 0.6238 | 0.0085  | 0.0011 |
| rs36011282  | 18 | 58,973,546  | A | G | 0.4351 | -0.0083 | 0.0011 |
| rs113254115 | 19 | 13,191,646  | T | C | 0.1126 | -0.0131 | 0.0017 |
| rs12516485  | 5  | 3,269,403   | A | G | 0.1251 | 0.0125  | 0.0016 |
| rs112611766 | 2  | 104,511,377 | A | T | 0.9377 | -0.0171 | 0.0022 |
| rs66968950  | 4  | 80,909,460  | A | C | 0.6366 | 0.0086  | 0.0011 |
| rs5024499   | 2  | 44,446,931  | A | T | 0.8027 | -0.0103 | 0.0013 |
| rs7839989   | 8  | 133,796,266 | T | C | 0.2241 | 0.0099  | 0.0013 |
| rs6549670   | 3  | 74,936,132  | A | G | 0.1639 | 0.0111  | 0.0014 |
| rs2504846   | 6  | 40,373,846  | T | C | 0.0262 | -0.0258 | 0.0033 |
| rs11257765  | 10 | 12,434,742  | T | C | 0.6935 | -0.0090 | 0.0011 |
| rs853199    | 17 | 35,850,225  | T | C | 0.355  | 0.0086  | 0.0011 |
| rs12897542  | 14 | 72,449,591  | A | G | 0.8034 | -0.0103 | 0.0013 |
| rs11767283  | 7  | 121,947,456 | A | G | 0.7731 | 0.0099  | 0.0013 |
| rs9291436   | 4  | 22,165,174  | T | C | 0.6355 | 0.0085  | 0.0011 |
| rs6743032   | 2  | 126,024,787 | A | G | 0.0913 | -0.0143 | 0.0018 |
| rs170035    | 4  | 39,793,856  | A | G | 0.6208 | 0.0085  | 0.0011 |
| rs12104029  | 18 | 62,509,211  | C | G | 0.5305 | -0.0082 | 0.0010 |
| rs12981405  | 19 | 19,651,577  | T | C | 0.1656 | -0.0111 | 0.0014 |
| rs13060816  | 3  | 107,280,486 | T | C | 0.4705 | -0.0082 | 0.0010 |
| rs56256156  | 10 | 10,036,402  | A | C | 0.5914 | -0.0084 | 0.0011 |
| rs76835317  | 8  | 135,424,654 | A | G | 0.1213 | -0.0126 | 0.0016 |
| rs60637254  | 5  | 79,323,473  | C | G | 0.3972 | -0.0084 | 0.0011 |
| rs8004353   | 14 | 29,814,928  | A | C | 0.6418 | 0.0086  | 0.0011 |
| rs10214086  | 5  | 136,783,945 | A | T | 0.7487 | 0.0095  | 0.0012 |
| rs210152    | 6  | 33,515,520  | A | G | 0.8228 | -0.0107 | 0.0014 |
| rs6549016   | 3  | 85,180,270  | A | C | 0.4588 | -0.0082 | 0.0011 |
| rs10830858  | 11 | 91,896,638  | T | C | 0.5062 | 0.0082  | 0.0010 |
| rs35414043  | 15 | 66,839,394  | A | G | 0.0764 | -0.0154 | 0.0020 |
| rs2269506   | 3  | 50,595,141  | T | C | 0.1039 | 0.0134  | 0.0017 |
| rs62442809  | 7  | 21,132,591  | T | C | 0.284  | -0.0091 | 0.0012 |
| rs12694681  | 2  | 226,609,241 | T | G | 0.692  | 0.0089  | 0.0011 |
| rs4805753   | 19 | 32,818,419  | T | C | 0.199  | 0.0103  | 0.0013 |
| rs4376462   | 8  | 31,359,814  | T | G | 0.3977 | -0.0083 | 0.0011 |
| rs1103127   | 16 | 10,234,764  | A | G | 0.4911 | -0.0082 | 0.0010 |
| rs7097348   | 10 | 53,663,315  | T | C | 0.7168 | -0.0091 | 0.0012 |
| rs112255786 | 6  | 50,888,500  | C | G | 0.9385 | -0.0170 | 0.0022 |
| rs1779549   | 14 | 84,640,016  | A | C | 0.4623 | 0.0082  | 0.0010 |
| rs10853981  | 19 | 4,965,064   | A | G | 0.3286 | -0.0087 | 0.0011 |
| rs6684189   | 1  | 91,093,014  | T | C | 0.6302 | -0.0084 | 0.0011 |
| rs7449561   | 6  | 66,215,549  | A | G | 0.2268 | 0.0097  | 0.0012 |
| rs4780865   | 16 | 10,270,667  | A | G | 0.0897 | -0.0143 | 0.0018 |
| rs1337731   | 1  | 199,444,151 | A | G | 0.3344 | 0.0086  | 0.0011 |

|             |    |             |   |   |        |         |        |
|-------------|----|-------------|---|---|--------|---------|--------|
| rs16962845  | 16 | 61,028,673  | T | C | 0.8932 | -0.0132 | 0.0017 |
| rs4850954   | 2  | 101,573,214 | T | C | 0.4529 | 0.0082  | 0.0011 |
| rs1351665   | 3  | 126,892,288 | T | C | 0.4491 | 0.0082  | 0.0011 |
| rs16970633  | 15 | 40,642,877  | T | G | 0.1582 | -0.0111 | 0.0014 |
| rs1835388   | 4  | 65,603,569  | T | C | 0.4703 | -0.0081 | 0.0010 |
| rs73405293  | 12 | 117,522,917 | A | G | 0.1486 | 0.0114  | 0.0015 |
| rs4981711   | 14 | 30,074,001  | T | C | 0.6167 | 0.0084  | 0.0011 |
| rs7965875   | 12 | 130,753,437 | T | C | 0.7018 | -0.0089 | 0.0011 |
| rs2941318   | 16 | 9,312,782   | A | G | 0.4299 | 0.0082  | 0.0011 |
| rs10880961  | 12 | 46,765,228  | C | G | 0.398  | 0.0083  | 0.0011 |
| rs34719425  | 6  | 167,620,407 | T | C | 0.243  | 0.0095  | 0.0012 |
| rs10202640  | 2  | 28,434,477  | A | G | 0.1943 | -0.0103 | 0.0013 |
| rs12349094  | 9  | 95,953,313  | T | C | 0.5413 | 0.0082  | 0.0011 |
| rs1332894   | 9  | 87,250,817  | T | C | 0.134  | -0.0119 | 0.0015 |
| rs6704241   | 1  | 154,814,785 | A | G | 0.663  | 0.0086  | 0.0011 |
| rs4724085   | 7  | 42,015,480  | A | C | 0.6856 | -0.0087 | 0.0011 |
| rs9935637   | 16 | 76,469,730  | C | G | 0.4488 | 0.0082  | 0.0011 |
| rs6815512   | 4  | 173,075,232 | A | C | 0.5469 | -0.0081 | 0.0011 |
| rs4142529   | 6  | 98,322,361  | T | C | 0.1185 | -0.0126 | 0.0016 |
| rs2054805   | 8  | 92,021,036  | T | C | 0.725  | 0.0091  | 0.0012 |
| rs11191652  | 10 | 105,075,736 | T | G | 0.8617 | 0.0129  | 0.0017 |
| rs11698330  | 20 | 14,507,909  | T | G | 0.2011 | 0.0101  | 0.0013 |
| rs28607949  | 2  | 35,041,094  | T | C | 0.4539 | -0.0082 | 0.0011 |
| rs130649    | 22 | 39,645,316  | A | G | 0.2544 | 0.0094  | 0.0012 |
| rs2665668   | 2  | 60,768,978  | A | G | 0.6324 | -0.0084 | 0.0011 |
| rs1078364   | 18 | 9,427,545   | T | C | 0.7678 | 0.0096  | 0.0012 |
| rs12442630  | 15 | 57,148,007  | A | T | 0.9686 | 0.0232  | 0.0030 |
| rs10894605  | 11 | 132,654,027 | A | G | 0.5827 | 0.0082  | 0.0011 |
| rs9264644   | 6  | 31,238,522  | T | C | 0.2815 | -0.0091 | 0.0012 |
| rs35215630  | 5  | 136,765,039 | T | C | 0.3726 | 0.0084  | 0.0011 |
| rs4082337   | 10 | 65,487,810  | T | C | 0.6867 | 0.0088  | 0.0011 |
| rs6088618   | 20 | 33,409,350  | A | G | 0.449  | 0.0081  | 0.0011 |
| rs293009    | 5  | 58,027,009  | A | G | 0.5794 | 0.0082  | 0.0011 |
| rs1470223   | 18 | 50,116,751  | T | C | 0.2121 | 0.0099  | 0.0013 |
| rs7993752   | 13 | 42,573,980  | A | C | 0.5793 | 0.0082  | 0.0011 |
| rs72695265  | 1  | 112,155,679 | T | C | 0.2292 | -0.0096 | 0.0012 |
| rs76455914  | 7  | 71,775,291  | C | G | 0.0334 | 0.0225  | 0.0029 |
| rs149274654 | 1  | 74,378,017  | C | G | 0.0343 | 0.0229  | 0.0030 |
| rs16837395  | 3  | 131,378,324 | C | G | 0.4256 | -0.0082 | 0.0011 |
| rs75641874  | 5  | 91,210,381  | T | G | 0.0969 | 0.0137  | 0.0018 |
| rs4943074   | 13 | 31,646,255  | A | C | 0.5489 | 0.0081  | 0.0011 |
| rs1452082   | 3  | 62,465,039  | A | C | 0.5514 | 0.0081  | 0.0011 |
| rs6906818   | 6  | 142,970,259 | T | C | 0.5985 | 0.0082  | 0.0011 |
| rs217176    | 16 | 72,203,192  | T | C | 0.1806 | -0.0105 | 0.0014 |
| rs2710873   | 1  | 978,193     | A | G | 0.1607 | -0.0113 | 0.0015 |
| rs7137059   | 12 | 84,579,949  | A | G | 0.7885 | 0.0099  | 0.0013 |
| rs12147215  | 14 | 85,104,052  | A | G | 0.2299 | 0.0096  | 0.0012 |
| rs7983020   | 13 | 21,239,941  | T | C | 0.7151 | -0.0089 | 0.0012 |

|             |    |             |   |   |        |         |        |
|-------------|----|-------------|---|---|--------|---------|--------|
| rs143812851 | 16 | 61,773,849  | A | G | 0.1689 | -0.0108 | 0.0014 |
| rs13061596  | 3  | 18,014,304  | A | G | 0.045  | -0.0195 | 0.0025 |
| rs9491350   | 6  | 98,800,429  | C | G | 0.8912 | 0.0130  | 0.0017 |
| rs268134    | 2  | 65,608,363  | A | G | 0.2483 | 0.0093  | 0.0012 |
| rs1939800   | 11 | 105,814,770 | T | C | 0.3833 | 0.0083  | 0.0011 |
| rs72667460  | 1  | 66,536,012  | T | C | 0.0538 | 0.0178  | 0.0023 |
| rs55863153  | 12 | 123,637,698 | A | C | 0.9728 | -0.0249 | 0.0032 |
| rs12964590  | 18 | 77,632,580  | A | G | 0.4468 | -0.0081 | 0.0011 |
| rs11786807  | 8  | 105,077,013 | A | G | 0.5729 | -0.0081 | 0.0011 |
| rs1128687   | 17 | 78,973,474  | T | C | 0.5708 | -0.0081 | 0.0011 |
| rs305191    | 2  | 36,252,564  | T | C | 0.2675 | 0.0091  | 0.0012 |
| rs12912465  | 15 | 77,309,459  | T | C | 0.2689 | -0.0091 | 0.0012 |
| rs7716190   | 5  | 30,900,015  | C | G | 0.7701 | -0.0095 | 0.0012 |
| rs2591114   | 18 | 28,372,663  | A | G | 0.5455 | -0.0081 | 0.0011 |
| rs139019609 | 9  | 103,001,820 | A | G | 0.9564 | 0.0197  | 0.0026 |
| rs72665099  | 8  | 88,273,939  | T | G | 0.9333 | 0.0161  | 0.0021 |
| rs143095689 | 1  | 220,348,801 | T | C | 0.1857 | 0.0103  | 0.0013 |
| rs936580    | 15 | 40,924,578  | A | G | 0.1532 | 0.0111  | 0.0015 |
| rs2145265   | 20 | 58,232,736  | T | C | 0.8408 | 0.0110  | 0.0014 |
| rs12127928  | 1  | 28,708,529  | T | C | 0.8071 | 0.0102  | 0.0013 |
| rs2824999   | 21 | 20,060,670  | T | C | 0.7304 | -0.0090 | 0.0012 |
| rs2030323   | 11 | 27,728,539  | A | C | 0.2138 | 0.0098  | 0.0013 |
| rs12768641  | 10 | 134,966,154 | A | G | 0.7614 | 0.0094  | 0.0012 |
| rs7715167   | 5  | 170,778,824 | T | C | 0.3883 | -0.0082 | 0.0011 |
| rs62410180  | 4  | 17,904,598  | T | C | 0.9853 | -0.0335 | 0.0044 |
| rs11633934  | 15 | 27,994,731  | A | C | 0.5433 | 0.0080  | 0.0011 |
| rs72657787  | 1  | 38,010,243  | A | G | 0.0783 | -0.0149 | 0.0019 |
| rs2960296   | 4  | 2,943,672   | C | G | 0.4118 | 0.0081  | 0.0011 |
| rs11643516  | 16 | 26,456,439  | T | C | 0.4128 | -0.0081 | 0.0011 |
| rs11196397  | 10 | 115,375,528 | A | C | 0.2731 | 0.0090  | 0.0012 |
| rs7634036   | 3  | 18,508,640  | C | G | 0.2394 | -0.0094 | 0.0012 |
| rs1430047   | 2  | 16,646,461  | A | G | 0.7329 | -0.0090 | 0.0012 |
| rs1820986   | 2  | 68,075,346  | A | G | 0.1373 | -0.0116 | 0.0015 |
| rs1418004   | 1  | 70,117,448  | T | C | 0.4184 | -0.0081 | 0.0011 |
| rs72761767  | 9  | 122,077,623 | T | C | 0.9599 | -0.0203 | 0.0027 |
| rs35932033  | 8  | 127,417,164 | A | G | 0.7518 | -0.0093 | 0.0012 |
| rs9513416   | 13 | 99,055,774  | A | G | 0.8474 | -0.0111 | 0.0015 |
| rs56173013  | 7  | 99,600,405  | A | T | 0.5897 | 0.0081  | 0.0011 |
| rs9922098   | 16 | 73,440,877  | A | G | 0.5234 | 0.0080  | 0.0011 |
| rs6027503   | 20 | 58,893,584  | C | G | 0.5689 | -0.0081 | 0.0011 |
| rs8025575   | 15 | 26,788,083  | C | G | 0.4485 | -0.0080 | 0.0011 |
| rs7657329   | 4  | 181,308,073 | A | C | 0.3184 | -0.0086 | 0.0011 |
| rs73989464  | 2  | 215,241,551 | A | G | 0.8206 | -0.0104 | 0.0014 |
| rs7645013   | 3  | 127,157,758 | T | C | 0.2942 | -0.0087 | 0.0011 |
| rs1338263   | 6  | 93,640,548  | A | G | 0.5467 | -0.0080 | 0.0011 |
| rs2886405   | 10 | 127,152,944 | T | G | 0.3604 | 0.0083  | 0.0011 |
| rs55901919  | 2  | 212,289,451 | T | C | 0.2718 | -0.0090 | 0.0012 |
| rs9477291   | 6  | 17,015,638  | A | G | 0.3108 | -0.0086 | 0.0011 |

|             |    |               |   |        |         |        |
|-------------|----|---------------|---|--------|---------|--------|
| rs2100249   | 7  | 113,848,497 T | G | 0.352  | -0.0083 | 0.0011 |
| rs2338719   | 22 | 48,879,639 T  | C | 0.3413 | 0.0084  | 0.0011 |
| rs11030742  | 11 | 29,621,198 A  | G | 0.8232 | -0.0105 | 0.0014 |
| rs56181223  | 15 | 80,818,279 A  | T | 0.343  | -0.0084 | 0.0011 |
| rs9551887   | 13 | 30,884,268 T  | C | 0.549  | -0.0080 | 0.0011 |
| rs12518468  | 5  | 7,249,696 T   | C | 0.6672 | 0.0084  | 0.0011 |
| rs7382146   | 6  | 28,665,362 T  | C | 0.4488 | -0.0081 | 0.0011 |
| rs56355837  | 18 | 73,009,786 A  | C | 0.6641 | -0.0084 | 0.0011 |
| rs586875    | 11 | 30,755,937 A  | G | 0.4245 | 0.0080  | 0.0011 |
| rs111258777 | 2  | 58,346,019 T  | C | 0.8973 | -0.0131 | 0.0017 |
| rs4272263   | 7  | 14,502,670 A  | G | 0.3819 | -0.0082 | 0.0011 |
| rs1380669   | 1  | 69,786,922 A  | G | 0.7552 | 0.0092  | 0.0012 |
| rs61958175  | 13 | 58,680,250 A  | G | 0.9508 | -0.0186 | 0.0024 |
| rs6452080   | 5  | 22,325,948 T  | C | 0.4348 | 0.0080  | 0.0011 |
| rs7775100   | 6  | 96,519,657 T  | C | 0.3913 | -0.0081 | 0.0011 |
| rs4977885   | 9  | 23,687,983 A  | G | 0.3953 | -0.0082 | 0.0011 |
| rs62081488  | 18 | 35,169,974 T  | C | 0.0431 | -0.0196 | 0.0026 |
| rs34362479  | 18 | 35,106,736 C  | G | 0.949  | 0.0181  | 0.0024 |
| rs4261877   | 3  | 50,692,394 C  | G | 0.5248 | 0.0080  | 0.0010 |
| rs139872934 | 2  | 107,543,830 T | C | 0.0912 | 0.0138  | 0.0018 |
| rs73676288  | 7  | 11,959,827 A  | C | 0.3383 | 0.0097  | 0.0013 |
| rs9321394   | 6  | 99,600,083 A  | G | 0.2485 | 0.0092  | 0.0012 |
| rs10006551  | 4  | 105,433,088 T | C | 0.5439 | 0.0080  | 0.0011 |
| rs17276956  | 8  | 13,979,875 A  | C | 0.5213 | -0.0080 | 0.0010 |
| rs62092937  | 18 | 48,748,903 T  | C | 0.4459 | -0.0080 | 0.0011 |
| rs1904132   | 5  | 117,234,026 T | C | 0.3304 | -0.0085 | 0.0011 |
| rs6867285   | 5  | 60,521,741 T  | C | 0.1831 | -0.0103 | 0.0014 |
| rs9384761   | 6  | 97,369,078 A  | G | 0.2411 | -0.0093 | 0.0012 |
| rs10204322  | 2  | 166,244,681 A | G | 0.3172 | -0.0085 | 0.0011 |
| rs13247375  | 7  | 18,183,650 T  | C | 0.2062 | -0.0098 | 0.0013 |
| rs17557610  | 13 | 69,126,008 T  | C | 0.197  | -0.0100 | 0.0013 |
| rs573834    | 2  | 166,971,191 A | C | 0.1382 | -0.0115 | 0.0015 |
| rs11227217  | 11 | 65,307,402 T  | C | 0.2059 | -0.0098 | 0.0013 |
| rs2097532   | 1  | 20,551,745 T  | C | 0.6437 | 0.0083  | 0.0011 |
| rs565960    | 1  | 175,850,823 T | C | 0.7114 | 0.0087  | 0.0012 |
| rs2319989   | 17 | 50,691,493 A  | T | 0.8172 | 0.0102  | 0.0014 |
| rs117873454 | 11 | 66,102,557 T  | C | 0.0466 | 0.0189  | 0.0025 |
| rs59903549  | 6  | 156,448,341 T | C | 0.0752 | -0.0150 | 0.0020 |
| rs3936100   | 18 | 5,872,442 T   | G | 0.3674 | 0.0082  | 0.0011 |
| rs4652548   | 1  | 180,954,130 T | C | 0.5889 | 0.0080  | 0.0011 |
| rs1182532   | 20 | 58,393,545 A  | C | 0.1549 | 0.0111  | 0.0015 |
| rs62179650  | 2  | 189,135,884 A | G | 0.2979 | 0.0087  | 0.0012 |
| rs12339610  | 9  | 121,922,801 T | C | 0.7401 | 0.0090  | 0.0012 |
| rs79431768  | 5  | 86,959,865 C  | G | 0.9035 | 0.0134  | 0.0018 |
| rs12914489  | 15 | 74,187,937 A  | G | 0.1035 | -0.0130 | 0.0017 |
| rs2298679   | 21 | 35,247,460 T  | C | 0.2051 | -0.0098 | 0.0013 |
| rs2212940   | 1  | 91,103,227 A  | G | 0.3966 | -0.0081 | 0.0011 |
| rs10906209  | 10 | 12,740,082 A  | C | 0.4583 | -0.0080 | 0.0011 |

|             |    |             |   |   |        |         |        |
|-------------|----|-------------|---|---|--------|---------|--------|
| rs1519799   | 2  | 157,064,317 | A | T | 0.5792 | 0.0080  | 0.0011 |
| rs4538748   | 6  | 32,657,505  | T | C | 0.6125 | 0.0082  | 0.0011 |
| rs9465509   | 6  | 19,744,129  | A | G | 0.4815 | -0.0079 | 0.0010 |
| rs6737433   | 2  | 1,903,987   | C | G | 0.7747 | 0.0095  | 0.0013 |
| rs7641534   | 3  | 139,700,752 | T | C | 0.4567 | -0.0079 | 0.0011 |
| rs73411780  | 12 | 122,204,870 | T | C | 0.9481 | 0.0178  | 0.0024 |
| rs72771835  | 5  | 87,736,334  | A | T | 0.0729 | 0.0152  | 0.0020 |
| rs10419571  | 19 | 4,499,976   | T | C | 0.6825 | -0.0085 | 0.0011 |
| rs10445864  | 2  | 115,929,277 | A | G | 0.6052 | -0.0081 | 0.0011 |
| rs6028103   | 20 | 59,886,152  | T | C | 0.8264 | 0.0104  | 0.0014 |
| rs35482321  | 16 | 1,255,832   | T | C | 0.3103 | -0.0086 | 0.0011 |
| rs11861256  | 16 | 48,747,433  | A | C | 0.191  | 0.0100  | 0.0013 |
| rs71421657  | 2  | 233,583,662 | T | C | 0.9273 | 0.0153  | 0.0020 |
| rs17721326  | 8  | 139,310,138 | T | C | 0.2951 | 0.0087  | 0.0011 |
| rs2999158   | 1  | 113,239,478 | T | C | 0.3324 | 0.0084  | 0.0011 |
| rs2011074   | 5  | 88,741,059  | T | C | 0.3521 | 0.0083  | 0.0011 |
| rs801563    | 5  | 134,984,992 | T | C | 0.2112 | -0.0097 | 0.0013 |
| rs7121640   | 11 | 116,155,104 | C | G | 0.4199 | 0.0080  | 0.0011 |
| rs9595590   | 13 | 47,642,196  | A | T | 0.4883 | 0.0079  | 0.0010 |
| rs62238582  | 3  | 18,627,969  | A | G | 0.1053 | -0.0128 | 0.0017 |
| rs10145770  | 14 | 28,733,956  | A | G | 0.2145 | -0.0096 | 0.0013 |
| rs117623405 | 19 | 32,204,489  | A | G | 0.8515 | -0.0111 | 0.0015 |
| rs164938    | 3  | 10,315,103  | T | G | 0.3936 | -0.0081 | 0.0011 |
| rs6425839   | 1  | 34,262,167  | T | G | 0.5082 | 0.0079  | 0.0010 |
| rs211283    | 10 | 32,331,161  | C | G | 0.24   | -0.0092 | 0.0012 |
| rs10811892  | 9  | 23,342,278  | T | C | 0.0463 | -0.0190 | 0.0025 |
| rs2283070   | 7  | 126,393,180 | T | C | 0.4098 | 0.0080  | 0.0011 |
| rs8012614   | 14 | 73,954,464  | A | C | 0.4996 | -0.0079 | 0.0010 |
| rs6901175   | 6  | 32,198,527  | A | G | 0.1329 | -0.0118 | 0.0016 |
| rs9807112   | 18 | 52,541,788  | T | C | 0.6859 | -0.0085 | 0.0011 |
| rs2931203   | 2  | 240,324,316 | A | T | 0.7566 | -0.0092 | 0.0012 |
| rs79556505  | 6  | 145,634,441 | T | C | 0.8995 | -0.0131 | 0.0017 |
| rs1944386   | 18 | 36,037,621  | T | C | 0.6447 | -0.0082 | 0.0011 |
| rs6880251   | 5  | 149,652,000 | T | C | 0.2305 | -0.0094 | 0.0012 |
| rs2241908   | 11 | 62,555,242  | A | G | 0.6594 | 0.0083  | 0.0011 |
| rs149662    | 14 | 72,639,496  | T | C | 0.1887 | 0.0101  | 0.0013 |
| rs2303929   | 7  | 150,761,314 | A | G | 0.2329 | 0.0093  | 0.0012 |
| rs10204051  | 2  | 103,775,435 | T | G | 0.408  | -0.0080 | 0.0011 |
| rs16854920  | 1  | 204,966,170 | T | C | 0.6632 | -0.0083 | 0.0011 |
| rs4449378   | 4  | 170,283,961 | T | C | 0.6128 | -0.0081 | 0.0011 |
| rs115802105 | 1  | 150,053,389 | T | C | 0.954  | -0.0191 | 0.0025 |
| rs795540    | 5  | 13,817,984  | T | C | 0.5854 | -0.0080 | 0.0011 |
| rs62301644  | 4  | 22,215,147  | A | G | 0.0906 | 0.0137  | 0.0018 |
| rs28597883  | 16 | 82,647,566  | C | G | 0.4551 | 0.0079  | 0.0011 |
| rs838041    | 2  | 140,315,378 | T | C | 0.352  | -0.0082 | 0.0011 |
| rs35209304  | 19 | 36,175,055  | T | C | 0.1915 | 0.0100  | 0.0013 |
| rs6450460   | 5  | 57,323,145  | C | G | 0.2066 | 0.0097  | 0.0013 |
| rs61908920  | 11 | 134,454,235 | A | T | 0.1603 | 0.0107  | 0.0014 |

|             |    |             |   |   |        |         |        |
|-------------|----|-------------|---|---|--------|---------|--------|
| rs7544544   | 1  | 105,842,991 | A | C | 0.6316 | 0.0081  | 0.0011 |
| rs13246220  | 7  | 39,324,253  | T | G | 0.6154 | -0.0081 | 0.0011 |
| rs2607505   | 5  | 52,976,955  | C | G | 0.6865 | -0.0085 | 0.0011 |
| rs18737064  | 3  | 48,512,188  | A | C | 0.0099 | 0.0458  | 0.0061 |
| rs1670459   | 11 | 76,998,753  | C | G | 0.6083 | -0.0080 | 0.0011 |
| rs28741121  | 22 | 42,025,823  | A | G | 0.166  | 0.0106  | 0.0014 |
| rs9380237   | 6  | 31,264,392  | A | G | 0.27   | -0.0090 | 0.0012 |
| rs2183271   | 10 | 21,957,229  | T | C | 0.6284 | 0.0082  | 0.0011 |
| rs74078214  | 14 | 98,501,547  | A | T | 0.2842 | -0.0087 | 0.0012 |
| rs2242265   | 8  | 145,667,354 | A | C | 0.5313 | 0.0079  | 0.0011 |
| rs17760286  | 6  | 98,763,844  | A | C | 0.0501 | -0.0211 | 0.0028 |
| rs18970704  | 1  | 169,160,349 | A | C | 0.3983 | 0.0093  | 0.0012 |
| rs114440021 | 21 | 34,202,672  | T | C | 0.114  | 0.0123  | 0.0016 |
| rs13872384  | 2  | 51,535,906  | A | G | 0.9783 | -0.0269 | 0.0036 |
| rs259812    | 2  | 180,787,654 | A | C | 0.6949 | 0.0085  | 0.0011 |
| rs544565    | 9  | 14,068,504  | T | G | 0.3056 | 0.0085  | 0.0011 |
| rs7515450   | 1  | 78,582,845  | A | T | 0.3917 | 0.0080  | 0.0011 |
| rs4586770   | 3  | 79,591,854  | T | C | 0.3983 | -0.0080 | 0.0011 |
| rs6535025   | 4  | 135,457,628 | A | G | 0.1976 | -0.0098 | 0.0013 |
| rs7796089   | 7  | 77,512,098  | C | G | 0.3381 | -0.0083 | 0.0011 |
| rs1884368   | 1  | 61,839,973  | T | C | 0.2472 | 0.0091  | 0.0012 |
| rs2204506   | 2  | 124,196,072 | A | G | 0.5657 | 0.0079  | 0.0011 |
| rs74740938  | 10 | 66,921,055  | A | T | 0.1186 | 0.0121  | 0.0016 |
| rs61226201  | 2  | 29,060,630  | A | T | 0.4227 | 0.0091  | 0.0012 |
| rs947091    | 10 | 31,054,186  | A | G | 0.4799 | -0.0078 | 0.0010 |
| rs13030436  | 2  | 23,301,140  | T | C | 0.434  | 0.0079  | 0.0011 |
| rs11209894  | 1  | 41,798,668  | A | G | 0.1336 | 0.0115  | 0.0015 |
| rs8047204   | 16 | 89,766,063  | A | G | 0.6296 | 0.0081  | 0.0011 |
| rs9276822   | 6  | 32,829,320  | A | C | 0.101  | 0.0130  | 0.0017 |
| rs6907381   | 6  | 11,972,512  | A | G | 0.1237 | -0.0118 | 0.0016 |
| rs12064553  | 1  | 212,397,008 | A | T | 0.2278 | 0.0093  | 0.0012 |
| rs78873173  | 2  | 80,414,593  | A | G | 0.0811 | 0.0143  | 0.0019 |
| rs17234990  | 3  | 7,195,141   | T | C | 0.6802 | -0.0084 | 0.0011 |
| rs7073711   | 10 | 10,884,232  | A | G | 0.8514 | 0.0110  | 0.0015 |
| rs11653258  | 17 | 44,017,725  | T | G | 0.2287 | 0.0094  | 0.0013 |
| rs225285    | 17 | 33,931,084  | C | G | 0.729  | -0.0088 | 0.0012 |
| rs3020326   | 6  | 152,295,185 | A | T | 0.6944 | 0.0085  | 0.0011 |
| rs1338721   | 1  | 66,690,704  | A | G | 0.4661 | -0.0078 | 0.0010 |
| rs1361580   | 13 | 81,291,962  | C | G | 0.2066 | 0.0096  | 0.0013 |
| rs75795256  | 3  | 82,998,151  | T | C | 0.9086 | -0.0136 | 0.0018 |
| rs13785839  | 1  | 96,454,977  | A | G | 0.9333 | 0.0156  | 0.0021 |
| rs1638526   | 17 | 19,848,450  | T | C | 0.7414 | 0.0089  | 0.0012 |
| rs6448740   | 4  | 31,053,009  | C | G | 0.5077 | -0.0078 | 0.0010 |
| rs7936656   | 11 | 76,203,671  | A | G | 0.3202 | -0.0083 | 0.0011 |
| rs2283250   | 11 | 17,820,177  | A | G | 0.4843 | -0.0078 | 0.0010 |
| rs13085461  | 3  | 24,950,387  | C | G | 0.4744 | 0.0078  | 0.0010 |
| rs73185898  | 7  | 101,727,633 | C | G | 0.8155 | 0.0109  | 0.0015 |
| rs62156740  | 2  | 98,875,977  | A | T | 0.9812 | -0.0288 | 0.0039 |



|             |    |             |   |   |        |         |        |
|-------------|----|-------------|---|---|--------|---------|--------|
| rs35912643  | 1  | 107,015,493 | C | G | 0.8483 | -0.0108 | 0.0015 |
| rs11622954  | 14 | 57,434,866  | T | C | 0.2813 | -0.0086 | 0.0012 |
| rs1408284   | 6  | 93,893,586  | C | G | 0.8614 | -0.0112 | 0.0015 |
| rs12589471  | 14 | 72,295,890  | A | T | 0.3841 | -0.0080 | 0.0011 |
| rs11652522  | 17 | 43,055,579  | A | C | 0.1082 | -0.0125 | 0.0017 |
| rs9277988   | 6  | 33,306,235  | T | C | 0.8018 | 0.0098  | 0.0013 |
| rs13389012  | 2  | 156,636,497 | T | C | 0.6639 | 0.0082  | 0.0011 |
| rs4741510   | 9  | 15,591,372  | A | T | 0.4163 | 0.0079  | 0.0011 |
| rs72802661  | 5  | 153,031,177 | A | C | 0.0231 | -0.0259 | 0.0035 |
| rs117736305 | 10 | 106,229,405 | A | G | 0.0556 | -0.0170 | 0.0023 |
| rs10180485  | 2  | 51,322,168  | T | G | 0.879  | 0.0119  | 0.0016 |
| rs537342    | 1  | 89,099,222  | T | C | 0.4215 | -0.0079 | 0.0011 |
| rs444944    | 3  | 13,117,999  | A | G | 0.4692 | -0.0078 | 0.0011 |
| rs1648404   | 4  | 37,175,523  | T | C | 0.4732 | 0.0078  | 0.0010 |
| rs12202891  | 6  | 12,768,218  | T | C | 0.1729 | 0.0104  | 0.0014 |
| rs8055491   | 16 | 52,824,235  | A | G | 0.4648 | -0.0078 | 0.0010 |
| rs8061672   | 16 | 61,787,127  | T | C | 0.4375 | -0.0078 | 0.0011 |
| rs1935309   | 6  | 14,612,872  | T | G | 0.8964 | 0.0127  | 0.0017 |
| rs41379545  | 14 | 84,477,713  | T | C | 0.081  | -0.0142 | 0.0019 |
| rs1039617   | 3  | 136,985,329 | T | C | 0.4177 | -0.0078 | 0.0011 |
| rs9454264   | 6  | 68,447,698  | T | C | 0.4693 | 0.0078  | 0.0011 |
| rs115124024 | 12 | 2,365,908   | A | C | 0.9505 | 0.0178  | 0.0024 |
| rs10863816  | 1  | 210,398,242 | A | G | 0.2874 | 0.0085  | 0.0012 |
| rs860973    | 20 | 58,247,236  | T | C | 0.1846 | 0.0100  | 0.0014 |
| rs10099657  | 8  | 69,202,702  | A | G | 0.654  | -0.0081 | 0.0011 |
| rs1934619   | 1  | 210,896,752 | A | G | 0.2808 | -0.0086 | 0.0012 |
| rs1128956   | 4  | 183,724,005 | T | G | 0.8262 | -0.0102 | 0.0014 |
| rs4869852   | 6  | 155,622,481 | T | C | 0.6625 | -0.0082 | 0.0011 |
| rs1378893   | 15 | 51,964,788  | A | G | 0.2379 | 0.0091  | 0.0012 |
| rs7801226   | 7  | 104,460,733 | A | T | 0.7582 | 0.0090  | 0.0012 |
| rs11589723  | 1  | 69,328,993  | T | C | 0.8976 | -0.0127 | 0.0017 |
| rs79994966  | 16 | 53,823,727  | T | C | 0.6087 | -0.0079 | 0.0011 |
| rs4262652   | 10 | 74,127,853  | A | G | 0.6331 | -0.0081 | 0.0011 |
| rs9937449   | 16 | 78,171,376  | T | C | 0.5553 | 0.0078  | 0.0011 |
| rs10086297  | 8  | 119,480,487 | C | G | 0.5167 | 0.0077  | 0.0010 |
| rs72720394  | 1  | 91,178,627  | A | G | 0.0592 | -0.0164 | 0.0022 |
| rs1207953   | 13 | 32,977,532  | C | G | 0.619  | -0.0080 | 0.0011 |
| rs852000    | 6  | 152,001,626 | T | C | 0.4688 | 0.0077  | 0.0010 |
| rs9749921   | 2  | 193,599,394 | C | G | 0.4814 | 0.0077  | 0.0010 |
| rs1430143   | 2  | 183,356,945 | A | C | 0.6192 | 0.0079  | 0.0011 |
| rs10765775  | 11 | 95,656,362  | A | G | 0.3878 | 0.0159  | 0.0022 |
| rs2669890   | 3  | 114,333,798 | A | T | 0.2176 | 0.0093  | 0.0013 |
| rs7297828   | 12 | 26,675,954  | A | G | 0.7384 | 0.0088  | 0.0012 |
| rs12808630  | 11 | 70,483,581  | A | G | 0.2426 | -0.0090 | 0.0012 |
| rs6757087   | 2  | 212,680,523 | T | G | 0.5716 | -0.0078 | 0.0011 |
| rs12538157  | 7  | 54,351,110  | A | T | 0.6746 | -0.0082 | 0.0011 |
| rs2459338   | 2  | 13,050,027  | A | G | 0.484  | 0.0077  | 0.0010 |
| rs11709621  | 3  | 72,344,601  | T | C | 0.2031 | -0.0096 | 0.0013 |

|             |    |             |   |   |        |         |        |
|-------------|----|-------------|---|---|--------|---------|--------|
| rs11731597  | 4  | 10,075,485  | T | C | 0.2947 | 0.0084  | 0.0011 |
| rs17743339  | 10 | 75,860,098  | A | G | 0.2476 | 0.0089  | 0.0012 |
| rs9753040   | 2  | 51,050,302  | T | C | 0.5084 | -0.0077 | 0.0010 |
| rs58996896  | 2  | 123,735,005 | A | G | 0.7466 | -0.0088 | 0.0012 |
| rs4697062   | 4  | 24,483,311  | T | C | 0.4365 | 0.0078  | 0.0011 |
| rs72898028  | 18 | 38,979,355  | T | C | 0.0355 | 0.0209  | 0.0028 |
| rs6580068   | 5  | 153,673,621 | T | C | 0.2188 | -0.0093 | 0.0013 |
| rs2980813   | 8  | 40,050,010  | A | T | 0.4696 | 0.0077  | 0.0010 |
| rs2676507   | 2  | 173,729,572 | A | G | 0.3179 | 0.0083  | 0.0011 |
| rs142641056 | 16 | 62,117,384  | A | C | 0.0088 | 0.0419  | 0.0057 |
| rs4782779   | 16 | 83,402,943  | A | G | 0.3635 | -0.0080 | 0.0011 |
| rs10914136  | 1  | 180,896,930 | C | G | 0.5381 | -0.0077 | 0.0011 |
| rs10954780  | 8  | 31,021,717  | C | G | 0.4902 | -0.0077 | 0.0010 |
| rs7762296   | 6  | 170,042,465 | T | C | 0.305  | -0.0084 | 0.0011 |
| rs537065442 | 3  | 49,615,202  | A | G | 0.9867 | -0.0355 | 0.0048 |
| rs7865184   | 9  | 14,687,867  | A | G | 0.5873 | 0.0078  | 0.0011 |
| rs336433    | 8  | 577,101     | A | G | 0.4398 | 0.0077  | 0.0011 |
| rs7296742   | 12 | 95,147,249  | A | G | 0.2849 | -0.0086 | 0.0012 |
| rs2610044   | 8  | 57,415,829  | A | T | 0.4556 | 0.0077  | 0.0011 |
| rs11148415  | 13 | 58,266,614  | C | G | 0.7101 | -0.0085 | 0.0012 |
| rs2321157   | 13 | 58,736,901  | A | G | 0.5284 | -0.0077 | 0.0010 |
| rs66770912  | 2  | 60,945,703  | T | C | 0.2624 | 0.0087  | 0.0012 |
| rs10994470  | 10 | 51,558,660  | A | G | 0.039  | 0.0200  | 0.0027 |
| rs11775016  | 8  | 118,810,647 | A | T | 0.0967 | -0.0130 | 0.0018 |
| rs4730020   | 7  | 104,189,082 | T | C | 0.2687 | 0.0087  | 0.0012 |
| rs7578247   | 2  | 128,562,813 | A | G | 0.6377 | -0.0080 | 0.0011 |
| rs75672140  | 14 | 57,336,842  | A | C | 0.0414 | 0.0193  | 0.0026 |
| rs8011681   | 14 | 101,541,337 | T | G | 0.4624 | -0.0077 | 0.0011 |
| rs4341632   | 13 | 97,081,244  | A | G | 0.1225 | 0.0117  | 0.0016 |
| rs73207502  | 13 | 58,359,289  | T | C | 0.0271 | -0.0240 | 0.0033 |
| rs134545    | 22 | 28,799,080  | T | C | 0.6426 | -0.0080 | 0.0011 |
| rs719839    | 12 | 12,819,861  | A | T | 0.5271 | -0.0077 | 0.0010 |
| rs2332752   | 14 | 72,552,726  | C | G | 0.9121 | 0.0136  | 0.0019 |
| rs73055556  | 3  | 28,027,538  | A | G | 0.1377 | 0.0111  | 0.0015 |
| rs1811835   | 16 | 1,379,555   | T | C | 0.1157 | 0.0120  | 0.0016 |
| rs4846724   | 1  | 221,967,817 | A | G | 0.5326 | 0.0077  | 0.0010 |
| rs7563343   | 2  | 144,337,145 | T | C | 0.2195 | -0.0092 | 0.0013 |
| rs10884009  | 10 | 106,273,778 | C | G | 0.7876 | 0.0094  | 0.0013 |
| rs16919774  | 12 | 32,502,505  | A | T | 0.7873 | -0.0093 | 0.0013 |
| rs113389222 | 3  | 34,215,436  | T | C | 0.1217 | -0.0117 | 0.0016 |
| rs56188374  | 4  | 158,860,186 | A | G | 0.0827 | -0.0141 | 0.0019 |
| rs6480151   | 10 | 67,994,452  | A | T | 0.7639 | 0.0090  | 0.0012 |
| rs11925699  | 3  | 193,321,115 | A | G | 0.4667 | -0.0077 | 0.0010 |
| rs2629540   | 10 | 126,426,148 | C | G | 0.2457 | 0.0089  | 0.0012 |
| rs1880692   | 11 | 80,338,069  | A | G | 0.5376 | 0.0077  | 0.0010 |
| rs2047229   | 12 | 56,783,240  | T | C | 0.2872 | -0.0086 | 0.0012 |
| rs675806    | 18 | 41,753,928  | A | C | 0.3454 | -0.0080 | 0.0011 |
| rs737902    | 7  | 95,138,755  | A | G | 0.2745 | -0.0086 | 0.0012 |

|             |    |             |   |   |        |         |        |
|-------------|----|-------------|---|---|--------|---------|--------|
| rs4675248   | 2  | 202,880,230 | A | G | 0.3952 | -0.0078 | 0.0011 |
| rs231178    | 4  | 2,751,772   | T | C | 0.2978 | 0.0084  | 0.0011 |
| rs4272628   | 1  | 189,603,032 | A | G | 0.525  | -0.0076 | 0.0010 |
| rs232464    | 21 | 22,695,321  | T | C | 0.2226 | 0.0092  | 0.0013 |
| rs117588584 | 12 | 26,510,514  | T | C | 0.0917 | -0.0132 | 0.0018 |
| rs9291467   | 4  | 25,428,296  | T | C | 0.4587 | -0.0077 | 0.0011 |
| rs72842507  | 5  | 169,296,821 | T | C | 0.1033 | 0.0125  | 0.0017 |
| rs188192    | 16 | 28,131,510  | A | C | 0.2938 | 0.0084  | 0.0011 |
| rs3851013   | 16 | 12,218,083  | A | G | 0.1688 | -0.0102 | 0.0014 |
| rs10754918  | 2  | 144,142,749 | A | G | 0.1832 | -0.0099 | 0.0014 |
| rs489408    | 1  | 38,243,785  | A | G | 0.4529 | 0.0077  | 0.0011 |
| rs11746390  | 5  | 137,085,233 | T | C | 0.7315 | -0.0086 | 0.0012 |
| rs646384    | 11 | 63,875,456  | A | G | 0.8032 | -0.0096 | 0.0013 |
| rs78655387  | 11 | 121,343,435 | T | C | 0.0271 | -0.0239 | 0.0033 |
| rs1961225   | 15 | 36,127,236  | T | C | 0.4208 | 0.0077  | 0.0011 |
| rs13065045  | 3  | 21,065,052  | A | C | 0.531  | -0.0076 | 0.0010 |
| rs61747226  | 15 | 98,512,431  | T | C | 0.0434 | -0.0189 | 0.0026 |
| rs7137535   | 12 | 23,945,031  | T | C | 0.8639 | -0.0112 | 0.0015 |
| rs72784111  | 5  | 106,631,814 | T | C | 0.913  | -0.0135 | 0.0019 |
| rs9809578   | 3  | 106,091,984 | A | G | 0.4423 | 0.0077  | 0.0011 |
| rs28568334  | 1  | 75,199,299  | C | G | 0.3203 | 0.0082  | 0.0011 |
| rs37903     | 7  | 122,411,623 | A | G | 0.8601 | 0.0110  | 0.0015 |
| rs2473351   | 1  | 15,742,689  | T | C | 0.7551 | 0.0088  | 0.0012 |
| rs72625841  | 3  | 21,430,442  | T | G | 0.7383 | 0.0086  | 0.0012 |
| rs17212552  | 2  | 124,836,896 | T | C | 0.1101 | 0.0122  | 0.0017 |
| rs2220468   | 9  | 11,190,741  | A | T | 0.3118 | 0.0082  | 0.0011 |
| rs9920297   | 15 | 69,955,716  | T | C | 0.6338 | 0.0079  | 0.0011 |
| rs114055010 | 6  | 30,527,296  | C | G | 0.9852 | -0.0321 | 0.0044 |
| rs10970007  | 9  | 3,107,295   | T | C | 0.6773 | -0.0081 | 0.0011 |
| rs75854315  | 1  | 156,223,056 | A | G | 0.0594 | -0.0162 | 0.0022 |
| rs113003165 | 7  | 2,150,450   | A | G | 0.027  | 0.0236  | 0.0033 |
| rs4483480   | 10 | 68,524,871  | T | C | 0.4256 | -0.0077 | 0.0011 |
| rs2270952   | 18 | 51,052,896  | A | T | 0.1107 | 0.0121  | 0.0017 |
| rs1389618   | 10 | 31,175,837  | A | G | 0.426  | -0.0077 | 0.0011 |
| rs4488350   | 13 | 58,234,226  | A | C | 0.5794 | -0.0077 | 0.0011 |
| rs74833567  | 8  | 110,201,408 | A | G | 0.0976 | 0.0128  | 0.0018 |
| rs34080199  | 15 | 77,812,028  | A | G | 0.9516 | 0.0180  | 0.0025 |
| rs1396558   | 9  | 106,413,885 | A | G | 0.4505 | -0.0076 | 0.0011 |
| rs4279337   | 5  | 124,284,656 | A | T | 0.2589 | 0.0087  | 0.0012 |
| rs10762199  | 10 | 70,030,464  | T | C | 0.7649 | 0.0089  | 0.0012 |
| rs7598465   | 2  | 139,639,576 | A | T | 0.5373 | -0.0076 | 0.0011 |
| rs55876360  | 5  | 107,145,324 | T | G | 0.8669 | 0.0112  | 0.0015 |
| rs13015323  | 2  | 125,291,034 | A | C | 0.4435 | 0.0076  | 0.0011 |
| rs79997166  | 2  | 161,808,690 | A | C | 0.9342 | 0.0154  | 0.0021 |
| rs6547396   | 2  | 82,132,940  | T | C | 0.5972 | 0.0077  | 0.0011 |
| rs73034295  | 11 | 133,822,133 | A | G | 0.1982 | 0.0095  | 0.0013 |
| rs12065238  | 1  | 166,101,602 | A | G | 0.1696 | 0.0101  | 0.0014 |
| rs11672103  | 19 | 9,942,810   | T | C | 0.5447 | -0.0076 | 0.0011 |

|             |    |             |   |   |        |         |        |
|-------------|----|-------------|---|---|--------|---------|--------|
| rs149285517 | 4  | 147,914,507 | T | C | 0.1149 | -0.0119 | 0.0016 |
| rs74843685  | 15 | 38,684,877  | T | G | 0.9253 | -0.0144 | 0.0020 |
| rs72833096  | 17 | 55,655,932  | C | G | 0.1481 | -0.0107 | 0.0015 |
| rs7660231   | 4  | 174,017,709 | A | T | 0.7062 | 0.0083  | 0.0011 |
| rs34410     | 5  | 107,469,684 | C | G | 0.4624 | -0.0076 | 0.0010 |
| rs62241756  | 3  | 20,281,021  | C | G | 0.8442 | -0.0104 | 0.0014 |
| rs12893970  | 14 | 56,474,502  | A | G | 0.0983 | -0.0127 | 0.0018 |
| rs1485299   | 8  | 120,082,104 | T | C | 0.3229 | -0.0081 | 0.0011 |
| rs11757278  | 6  | 13,180,454  | T | C | 0.6931 | -0.0082 | 0.0011 |
| rs11748392  | 5  | 58,772,631  | T | C | 0.9244 | -0.0143 | 0.0020 |
| rs2582974   | 2  | 104,578,923 | T | C | 0.4021 | -0.0084 | 0.0012 |
| rs1564860   | 8  | 119,975,670 | T | C | 0.3051 | 0.0082  | 0.0011 |
| rs41311445  | 22 | 42,070,374  | A | C | 0.901  | 0.0127  | 0.0018 |
| rs74944275  | 5  | 102,726,073 | T | C | 0.0417 | 0.0190  | 0.0026 |
| rs627685    | 18 | 53,186,092  | T | C | 0.6986 | 0.0082  | 0.0011 |
| rs2238483   | 16 | 22,860,975  | A | G | 0.8309 | 0.0101  | 0.0014 |
| rs57408535  | 5  | 122,813,029 | A | T | 0.518  | 0.0076  | 0.0010 |
| rs7146843   | 14 | 91,544,192  | A | G | 0.2408 | 0.0089  | 0.0012 |
| rs7148559   | 14 | 42,765,294  | A | G | 0.4843 | 0.0076  | 0.0010 |
| rs4888444   | 16 | 75,690,279  | A | G | 0.9553 | -0.0183 | 0.0025 |
| rs4545434   | 10 | 64,875,745  | T | C | 0.8147 | 0.0097  | 0.0013 |
| rs17207277  | 5  | 7,368,134   | A | T | 0.812  | -0.0097 | 0.0013 |
| rs7195329   | 16 | 51,590,733  | A | G | 0.2635 | 0.0086  | 0.0012 |
| rs62183418  | 2  | 176,233,578 | A | G | 0.8881 | 0.0120  | 0.0017 |
| rs10821992  | 10 | 64,163,029  | A | T | 0.3412 | -0.0080 | 0.0011 |
| rs1108130   | 13 | 100,648,356 | A | T | 0.2121 | -0.0092 | 0.0013 |
| rs1387148   | 4  | 19,590,971  | A | C | 0.1982 | -0.0095 | 0.0013 |
| rs74439972  | 19 | 13,285,834  | A | G | 0.2666 | 0.0087  | 0.0012 |
| rs7107378   | 11 | 111,401,840 | A | C | 0.3631 | 0.0078  | 0.0011 |
| rs66513368  | 16 | 82,833,448  | A | G | 0.9002 | 0.0126  | 0.0017 |
| rs143756010 | 3  | 49,312,248  | T | C | 0.0409 | -0.0191 | 0.0027 |
| rs75443990  | 8  | 4,826,197   | A | C | 0.1048 | 0.0123  | 0.0017 |
| rs2413005   | 22 | 31,405,191  | T | C | 0.3118 | 0.0081  | 0.0011 |
| rs67374027  | 2  | 157,520,186 | A | T | 0.2338 | -0.0089 | 0.0012 |
| rs74453875  | 3  | 52,046,707  | A | G | 0.0377 | 0.0199  | 0.0028 |
| rs1867011   | 3  | 3,760,767   | A | G | 0.1896 | 0.0097  | 0.0013 |
| rs35181444  | 14 | 101,912,518 | T | C | 0.258  | 0.0086  | 0.0012 |
| rs11822787  | 11 | 87,905,860  | T | C | 0.4435 | -0.0076 | 0.0011 |
| rs703482    | 10 | 106,889,202 | C | G | 0.1554 | -0.0104 | 0.0014 |
| rs11756638  | 6  | 27,187,414  | T | C | 0.9387 | -0.0157 | 0.0022 |
| rs111357343 | 2  | 172,616,423 | A | G | 0.2962 | 0.0082  | 0.0011 |
| rs13125074  | 4  | 91,808,902  | A | G | 0.2328 | 0.0089  | 0.0012 |
| rs9556587   | 13 | 97,079,618  | A | G | 0.6594 | 0.0079  | 0.0011 |
| rs1888765   | 10 | 23,943,839  | C | G | 0.7758 | 0.0090  | 0.0013 |
| rs477723    | 11 | 78,554,599  | T | C | 0.3745 | 0.0078  | 0.0011 |
| rs62232802  | 3  | 13,338,289  | A | C | 0.174  | 0.0099  | 0.0014 |
| rs1740190   | 21 | 19,919,453  | A | C | 0.7035 | 0.0082  | 0.0011 |
| rs28500769  | 16 | 58,714,819  | C | G | 0.7478 | -0.0086 | 0.0012 |

|             |    |               |   |        |         |        |
|-------------|----|---------------|---|--------|---------|--------|
| rs1973419   | 13 | 97,976,147 T  | C | 0.4903 | 0.0075  | 0.0010 |
| rs61768375  | 1  | 44,153,132 T  | C | 0.974  | 0.0237  | 0.0033 |
| rs7184911   | 16 | 7,670,326 A   | C | 0.5722 | 0.0076  | 0.0011 |
| rs12071311  | 1  | 69,125,112 C  | G | 0.9542 | 0.0182  | 0.0025 |
| rs79805373  | 14 | 69,736,557 A  | G | 0.069  | -0.0149 | 0.0021 |
| rs2546944   | 5  | 167,453,285 T | C | 0.6613 | 0.0079  | 0.0011 |
| rs76157199  | 2  | 98,541,874 A  | G | 0.9638 | 0.0202  | 0.0028 |
| rs6717332   | 2  | 58,446,080 T  | G | 0.9002 | -0.0125 | 0.0017 |
| rs6533225   | 4  | 78,642,389 C  | G | 0.5377 | 0.0075  | 0.0011 |
| rs2065057   | 22 | 27,975,321 A  | T | 0.7055 | 0.0082  | 0.0011 |
| rs14136746  | 3  | 53,381,546 T  | C | 0.9907 | 0.0405  | 0.0057 |
| rs7523793   | 1  | 242,253,024 T | C | 0.6384 | 0.0078  | 0.0011 |
| rs2061485   | 10 | 62,105,627 T  | C | 0.5122 | 0.0075  | 0.0010 |
| rs9400864   | 6  | 115,956,800 T | C | 0.6792 | 0.0080  | 0.0011 |
| rs10897561  | 11 | 79,898,660 T  | C | 0.6491 | 0.0078  | 0.0011 |
| rs826374    | 3  | 24,163,921 A  | C | 0.7718 | -0.0089 | 0.0012 |
| rs7468947   | 9  | 124,978,011 A | G | 0.233  | -0.0089 | 0.0012 |
| rs1125854   | 7  | 131,927,170 T | C | 0.3726 | -0.0077 | 0.0011 |
| rs76928788  | 3  | 46,949,112 A  | G | 0.0141 | -0.0324 | 0.0045 |
| rs1407350   | 9  | 10,246,520 T  | G | 0.651  | 0.0078  | 0.0011 |
| rs67856516  | 1  | 28,697,135 A  | C | 0.3091 | -0.0088 | 0.0012 |
| rs11692567  | 7  | 112,923,416 T | C | 0.0267 | -0.0232 | 0.0033 |
| rs59234174  | 9  | 16,730,258 T  | C | 0.1566 | -0.0103 | 0.0014 |
| rs7714719   | 5  | 106,498,927 C | G | 0.8629 | 0.0109  | 0.0015 |
| rs10184275  | 2  | 166,127,928 A | G | 0.817  | -0.0097 | 0.0014 |
| rs17330744  | 5  | 60,079,381 A  | G | 0.9712 | -0.0227 | 0.0032 |
| rs4662382   | 2  | 145,348,057 T | C | 0.1286 | -0.0112 | 0.0016 |
| rs68174505  | 22 | 51,108,072 A  | G | 0.2025 | -0.0093 | 0.0013 |
| rs1950265   | 14 | 78,594,765 A  | C | 0.4382 | 0.0075  | 0.0011 |
| rs28603130  | 3  | 183,950,306 C | G | 0.7492 | 0.0086  | 0.0012 |
| rs17092597  | 14 | 57,445,718 A  | G | 0.0506 | 0.0171  | 0.0024 |
| rs76370448  | 2  | 142,164,351 A | G | 0.1065 | 0.0121  | 0.0017 |
| rs9471333   | 6  | 40,362,023 T  | C | 0.5657 | 0.0075  | 0.0011 |
| rs10157166  | 1  | 214,484,950 T | C | 0.4028 | -0.0076 | 0.0011 |
| rs6661183   | 1  | 73,717,809 A  | T | 0.2716 | 0.0084  | 0.0012 |
| rs74694981  | 2  | 229,196,902 T | G | 0.9559 | -0.0182 | 0.0025 |
| rs238257    | 13 | 42,924,883 C  | G | 0.4816 | 0.0075  | 0.0010 |
| rs4904523   | 14 | 89,723,630 A  | G | 0.5176 | -0.0075 | 0.0010 |
| rs28617748  | 17 | 27,712,493 A  | T | 0.6595 | 0.0091  | 0.0013 |
| rs72719197  | 1  | 93,881,677 T  | C | 0.0308 | -0.0217 | 0.0030 |
| rs12142570  | 1  | 11,520,209 A  | T | 0.8331 | 0.0100  | 0.0014 |
| rs7131691   | 12 | 64,540,960 A  | G | 0.4705 | -0.0075 | 0.0011 |
| rs3751667   | 16 | 1,004,554 T   | C | 0.2291 | -0.0089 | 0.0012 |
| rs9426674   | 1  | 21,957,239 C  | G | 0.3976 | -0.0076 | 0.0011 |
| rs9320991   | 6  | 124,763,785 T | C | 0.1974 | 0.0094  | 0.0013 |
| rs118067691 | 12 | 56,493,021 T  | G | 0.9569 | -0.0186 | 0.0026 |
| rs909892    | 20 | 41,982,698 A  | G | 0.1357 | 0.0109  | 0.0015 |
| rs7072915   | 10 | 134,011,293 T | G | 0.5414 | 0.0075  | 0.0011 |

|             |    |             |   |   |        |         |        |
|-------------|----|-------------|---|---|--------|---------|--------|
| rs9468199   | 6  | 27,681,215  | A | G | 0.1774 | -0.0105 | 0.0015 |
| rs6926377   | 6  | 145,105,354 | A | C | 0.693  | 0.0081  | 0.0011 |
| rs2179403   | 6  | 23,495,260  | T | C | 0.6999 | 0.0081  | 0.0011 |
| rs1937526   | 13 | 68,046,162  | T | C | 0.3785 | 0.0077  | 0.0011 |
| rs72944032  | 18 | 63,501,972  | A | G | 0.2527 | 0.0086  | 0.0012 |
| rs355579    | 2  | 142,379,398 | A | G | 0.0704 | -0.0145 | 0.0020 |
| rs7928622   | 11 | 11,670,871  | A | T | 0.6768 | -0.0079 | 0.0011 |
| rs35565533  | 12 | 107,730,500 | A | C | 0.7349 | 0.0084  | 0.0012 |
| rs61578424  | 3  | 54,160,326  | T | G | 0.1502 | -0.0104 | 0.0015 |
| rs2736752   | 3  | 60,817,322  | T | G | 0.784  | 0.0090  | 0.0013 |
| rs13238939  | 7  | 21,685,861  | T | C | 0.5065 | -0.0074 | 0.0010 |
| rs17639442  | 13 | 57,577,138  | T | G | 0.9161 | -0.0134 | 0.0019 |
| rs386207    | 7  | 101,791,489 | A | T | 0.1176 | -0.0115 | 0.0016 |
| rs1861786   | 12 | 14,000,467  | A | G | 0.3807 | -0.0076 | 0.0011 |
| rs2451381   | 6  | 34,003,336  | A | T | 0.217  | -0.0091 | 0.0013 |
| rs853286    | 3  | 64,285,502  | T | G | 0.8908 | 0.0119  | 0.0017 |
| rs13078603  | 3  | 73,064,367  | A | G | 0.3962 | 0.0076  | 0.0011 |
| rs55640000  | 20 | 22,310,689  | T | G | 0.6425 | -0.0077 | 0.0011 |
| rs17311988  | 5  | 92,994,868  | T | C | 0.0191 | -0.0275 | 0.0039 |
| rs17675734  | 2  | 148,379,965 | A | C | 0.7878 | -0.0091 | 0.0013 |
| rs11891018  | 2  | 225,699,967 | A | T | 0.316  | 0.0080  | 0.0011 |
| rs6587843   | 1  | 59,540,811  | T | C | 0.4833 | 0.0074  | 0.0010 |
| rs2177083   | 2  | 202,961,665 | A | G | 0.5095 | -0.0074 | 0.0010 |
| rs12928216  | 16 | 26,167,059  | A | G | 0.4299 | 0.0075  | 0.0011 |
| rs1389997   | 21 | 19,046,075  | T | G | 0.3238 | 0.0079  | 0.0011 |
| rs11715034  | 3  | 51,409,600  | T | C | 0.6559 | 0.0078  | 0.0011 |
| rs34984805  | 17 | 9,987,091   | T | C | 0.5151 | 0.0074  | 0.0010 |
| rs1969794   | 13 | 99,090,168  | T | G | 0.3299 | -0.0083 | 0.0012 |
| rs11857810  | 15 | 51,396,571  | A | G | 0.3924 | 0.0076  | 0.0011 |
| rs1532312   | 11 | 84,841,573  | T | C | 0.2954 | 0.0081  | 0.0011 |
| rs56852527  | 11 | 46,048,384  | T | C | 0.2054 | 0.0092  | 0.0013 |
| rs11686212  | 2  | 3,392,295   | A | G | 0.6288 | -0.0077 | 0.0011 |
| rs1117310   | 14 | 56,686,732  | A | G | 0.4616 | 0.0074  | 0.0010 |
| rs72883760  | 11 | 29,331,969  | A | G | 0.2016 | 0.0092  | 0.0013 |
| rs2988061   | 9  | 92,163,132  | A | G | 0.4024 | -0.0075 | 0.0011 |
| rs13376365  | 1  | 197,890,802 | T | C | 0.7878 | 0.0090  | 0.0013 |
| rs11116176  | 12 | 84,434,919  | T | G | 0.2352 | 0.0087  | 0.0012 |
| rs181072050 | 1  | 93,665,006  | A | G | 0.9108 | 0.0142  | 0.0020 |
| rs752806    | 11 | 126,293,239 | A | T | 0.471  | -0.0074 | 0.0011 |
| rs13048654  | 21 | 34,449,397  | C | G | 0.7477 | -0.0085 | 0.0012 |
| rs9591001   | 13 | 33,042,870  | A | G | 0.365  | 0.0077  | 0.0011 |
| rs6500680   | 16 | 5,370,784   | A | G | 0.1145 | -0.0116 | 0.0016 |
| rs7750668   | 6  | 162,466,900 | T | G | 0.3203 | 0.0079  | 0.0011 |
| rs73047060  | 7  | 2,084,351   | T | C | 0.0253 | 0.0236  | 0.0033 |
| rs11122148  | 1  | 6,848,505   | A | C | 0.1561 | 0.0102  | 0.0014 |
| rs568332442 | 7  | 2,278,587   | A | G | 0.9592 | 0.0216  | 0.0031 |
| rs112365238 | 12 | 123,283,537 | A | G | 0.0325 | 0.0211  | 0.0030 |
| rs9640815   | 7  | 79,589,734  | C | G | 0.8021 | -0.0093 | 0.0013 |

|            |    |             |   |   |        |         |        |
|------------|----|-------------|---|---|--------|---------|--------|
| rs6772753  | 3  | 137,318,965 | A | G | 0.5431 | 0.0074  | 0.0011 |
| rs72887889 | 18 | 22,402,325  | A | T | 0.8083 | -0.0094 | 0.0013 |
| rs6795586  | 3  | 160,897,701 | T | G | 0.6825 | -0.0079 | 0.0011 |
| rs1537933  | 13 | 102,923,847 | A | G | 0.7138 | 0.0082  | 0.0012 |
| rs163523   | 2  | 45,157,427  | A | G | 0.9771 | -0.0247 | 0.0035 |
| rs13009915 | 2  | 100,423,158 | T | C | 0.0421 | 0.0185  | 0.0026 |
| rs705985   | 8  | 64,736,379  | T | G | 0.6046 | -0.0075 | 0.0011 |
| rs10167909 | 2  | 133,512,171 | T | C | 0.2147 | 0.0090  | 0.0013 |
| rs1372086  | 2  | 230,714,025 | A | G | 0.8461 | -0.0102 | 0.0015 |
| rs56826720 | 16 | 14,731,391  | A | C | 0.2979 | 0.0081  | 0.0011 |
| rs18892202 | 14 | 29,619,586  | A | T | 0.0148 | -0.0306 | 0.0044 |
| rs18429256 | 2  | 10,947,750  | T | G | 0.012  | 0.0350  | 0.0050 |
| rs6801153  | 3  | 24,113,697  | T | C | 0.2439 | -0.0086 | 0.0012 |
| rs75564433 | 3  | 81,948,615  | T | C | 0.0601 | 0.0155  | 0.0022 |
| rs7655988  | 4  | 66,527,955  | T | C | 0.3809 | -0.0076 | 0.0011 |
| rs4925093  | 17 | 17,568,946  | T | G | 0.482  | -0.0074 | 0.0010 |
| rs11165615 | 3  | 85,934,274  | A | T | 0.0424 | 0.0183  | 0.0026 |
| rs2098322  | 14 | 73,393,284  | A | G | 0.5067 | -0.0074 | 0.0011 |
| rs2857211  | 6  | 32,740,442  | A | G | 0.3363 | 0.0078  | 0.0011 |
| rs73009622 | 2  | 154,649,316 | C | G | 0.1005 | -0.0122 | 0.0017 |
| rs1585229  | 8  | 87,856,610  | A | G | 0.42   | -0.0074 | 0.0011 |
| rs4809393  | 20 | 62,701,092  | A | C | 0.6655 | 0.0078  | 0.0011 |
| rs10499146 | 6  | 129,330,021 | A | G | 0.1332 | 0.0108  | 0.0015 |
| rs785490   | 1  | 46,577,124  | T | C | 0.2899 | 0.0081  | 0.0012 |
| rs62525923 | 8  | 131,284,632 | T | C | 0.3908 | 0.0075  | 0.0011 |
| rs540730   | 12 | 57,807,114  | T | C | 0.2363 | -0.0087 | 0.0012 |
| rs7397905  | 12 | 101,537,184 | A | G | 0.8347 | 0.0099  | 0.0014 |
| rs2297293  | 21 | 47,125,046  | C | G | 0.3161 | 0.0079  | 0.0011 |
| rs514092   | 1  | 110,761,283 | T | C | 0.6323 | -0.0076 | 0.0011 |
| rs4621481  | 4  | 32,160,307  | T | G | 0.7149 | 0.0081  | 0.0012 |
| rs12232376 | 16 | 49,884,056  | A | G | 0.3025 | 0.0080  | 0.0011 |
| rs77997837 | 16 | 4,944,256   | T | C | 0.2276 | 0.0088  | 0.0012 |
| rs6916517  | 6  | 100,322,418 | T | C | 0.2706 | 0.0083  | 0.0012 |
| rs79766835 | 2  | 62,710,273  | C | G | 0.0969 | 0.0124  | 0.0018 |
| rs7777843  | 7  | 11,761,455  | C | G | 0.5712 | -0.0074 | 0.0011 |
| rs11772108 | 7  | 54,711,985  | A | T | 0.7214 | -0.0082 | 0.0012 |
| rs1916976  | 7  | 113,989,569 | T | C | 0.0885 | -0.0129 | 0.0018 |
| rs6911986  | 6  | 52,857,694  | T | C | 0.2682 | -0.0083 | 0.0012 |
| rs204993   | 6  | 32,155,581  | A | G | 0.7262 | 0.0083  | 0.0012 |
| rs11437129 | 3  | 48,406,286  | T | C | 0.9543 | 0.0177  | 0.0025 |
| rs11257909 | 20 | 34,530,095  | T | C | 0.0724 | 0.0142  | 0.0020 |
| rs35742190 | 1  | 183,679,666 | T | G | 0.4867 | 0.0073  | 0.0010 |
| rs13008966 | 2  | 144,117,605 | A | C | 0.7646 | -0.0086 | 0.0012 |
| rs4493405  | 3  | 141,645,747 | A | G | 0.5317 | 0.0073  | 0.0010 |
| rs3123344  | 6  | 98,852,218  | A | T | 0.5938 | -0.0075 | 0.0011 |
| rs7975065  | 12 | 62,680,603  | A | G | 0.3058 | 0.0080  | 0.0011 |
| rs6044142  | 20 | 16,559,255  | A | G | 0.5694 | -0.0074 | 0.0011 |
| rs9976560  | 21 | 44,038,275  | C | G | 0.7497 | 0.0085  | 0.0012 |

|             |    |             |   |   |        |         |        |
|-------------|----|-------------|---|---|--------|---------|--------|
| rs1948897   | 4  | 139,710,494 | A | G | 0.5555 | -0.0074 | 0.0011 |
| rs142747148 | 13 | 58,271,461  | A | G | 0.9807 | 0.0267  | 0.0038 |
| rs35483472  | 15 | 34,653,914  | T | C | 0.3808 | -0.0076 | 0.0011 |
| rs9888861   | 16 | 75,932,594  | A | T | 0.7509 | -0.0085 | 0.0012 |
| rs7815299   | 8  | 91,228,035  | C | G | 0.6699 | 0.0078  | 0.0011 |
| rs9356513   | 6  | 167,124,744 | A | C | 0.7076 | -0.0085 | 0.0012 |
| rs11734446  | 4  | 29,091,405  | C | G | 0.7381 | -0.0083 | 0.0012 |
| rs13001925  | 2  | 49,558,691  | A | G | 0.5944 | 0.0075  | 0.0011 |
| rs11179786  | 12 | 74,159,265  | T | C | 0.5842 | -0.0074 | 0.0011 |
| rs13106702  | 4  | 15,397,450  | A | G | 0.6384 | -0.0076 | 0.0011 |
| rs7598185   | 2  | 59,952,259  | A | C | 0.3073 | 0.0079  | 0.0011 |
| rs1130947   | 6  | 31,237,773  | T | C | 0.3354 | 0.0087  | 0.0012 |
| rs12722889  | 1  | 77,420,020  | A | T | 0.5711 | 0.0074  | 0.0011 |
| rs72843198  | 2  | 125,293,580 | T | C | 0.0482 | 0.0171  | 0.0024 |
| rs17014412  | 12 | 87,475,757  | A | G | 0.0341 | -0.0201 | 0.0029 |
| rs2192639   | 16 | 9,595,000   | C | G | 0.1258 | -0.0110 | 0.0016 |
| rs3750450   | 9  | 111,945,049 | T | G | 0.2634 | -0.0083 | 0.0012 |
| rs12174903  | 6  | 41,864,135  | A | C | 0.7523 | 0.0085  | 0.0012 |
| rs7014300   | 8  | 14,795,876  | A | C | 0.1935 | 0.0092  | 0.0013 |
| rs2237316   | 7  | 24,761,968  | T | G | 0.2008 | 0.0091  | 0.0013 |
| rs13332638  | 16 | 11,905,849  | A | G | 0.0862 | -0.0130 | 0.0019 |
| rs4140762   | 12 | 97,669,259  | A | G | 0.5207 | 0.0073  | 0.0010 |
| rs4943290   | 13 | 31,836,367  | T | G | 0.2998 | -0.0080 | 0.0011 |
| rs17463127  | 5  | 160,952,502 | A | T | 0.7348 | -0.0083 | 0.0012 |
| rs174768    | 22 | 29,742,841  | T | C | 0.8562 | 0.0104  | 0.0015 |
| rs4460271   | 7  | 32,496,503  | T | C | 0.6727 | 0.0078  | 0.0011 |
| rs1889438   | 6  | 157,105,541 | A | G | 0.2804 | -0.0081 | 0.0012 |
| rs8006699   | 14 | 103,194,998 | A | G | 0.8263 | 0.0096  | 0.0014 |
| rs3020410   | 6  | 152,266,377 | A | C | 0.1358 | -0.0106 | 0.0015 |
| rs8015454   | 14 | 67,739,285  | T | C | 0.9522 | 0.0171  | 0.0025 |
| rs2631249   | 4  | 102,872,175 | A | G | 0.5676 | 0.0073  | 0.0011 |
| rs2278474   | 4  | 184,831,976 | T | G | 0.5818 | -0.0074 | 0.0011 |
| rs2639655   | 3  | 158,385,966 | C | G | 0.8065 | 0.0092  | 0.0013 |
| rs1007731   | 14 | 37,054,590  | A | C | 0.1187 | -0.0113 | 0.0016 |
| rs2466211   | 8  | 22,843,997  | A | C | 0.3972 | -0.0074 | 0.0011 |
| rs12646225  | 4  | 696,848     | T | C | 0.1099 | 0.0118  | 0.0017 |
| rs75915571  | 6  | 114,723,478 | A | T | 0.1956 | 0.0092  | 0.0013 |
| rs12602072  | 17 | 56,144,013  | A | G | 0.8141 | 0.0094  | 0.0013 |
| rs56306348  | 14 | 36,876,908  | A | G | 0.6133 | 0.0075  | 0.0011 |
| rs674962    | 1  | 234,835,705 | C | G | 0.3272 | -0.0077 | 0.0011 |
| rs8017691   | 14 | 75,092,905  | A | C | 0.4257 | 0.0073  | 0.0011 |
| rs11011859  | 10 | 20,487,702  | A | G | 0.8828 | 0.0113  | 0.0016 |
| rs17598373  | 14 | 79,815,516  | T | C | 0.5573 | 0.0073  | 0.0011 |
| rs10510940  | 3  | 65,519,521  | A | G | 0.9045 | -0.0124 | 0.0018 |
| rs2824194   | 21 | 18,422,045  | A | T | 0.5035 | 0.0073  | 0.0010 |
| rs2192694   | 2  | 59,084,676  | T | C | 0.7139 | 0.0080  | 0.0012 |
| rs62442476  | 7  | 2,233,528   | A | G | 0.0348 | 0.0200  | 0.0029 |
| rs66977236  | 7  | 77,315,783  | A | G | 0.3566 | -0.0088 | 0.0013 |



|             |    |             |   |   |        |         |        |
|-------------|----|-------------|---|---|--------|---------|--------|
| rs2986017   | 10 | 105,218,252 | A | G | 0.2739 | -0.0081 | 0.0012 |
| rs56378598  | 16 | 90,004,868  | T | C | 0.2652 | 0.0083  | 0.0012 |
| rs12155345  | 7  | 41,301,734  | A | C | 0.6689 | 0.0077  | 0.0011 |
| rs116506968 | 2  | 183,551,471 | A | G | 0.0869 | 0.0130  | 0.0019 |
| rs11752345  | 6  | 160,148,348 | T | C | 0.215  | 0.0089  | 0.0013 |
| rs34034658  | 2  | 236,839,797 | C | G | 0.3796 | 0.0075  | 0.0011 |
| rs10076155  | 5  | 57,567,125  | T | C | 0.24   | -0.0085 | 0.0012 |
| rs717112    | 11 | 41,162,903  | A | G | 0.1804 | -0.0094 | 0.0014 |
| rs10508274  | 10 | 4,115,602   | A | G | 0.8201 | 0.0094  | 0.0014 |
| rs6495127   | 15 | 75,194,490  | T | C | 0.6959 | 0.0079  | 0.0011 |
| rs12516990  | 5  | 145,927,688 | C | G | 0.2066 | -0.0089 | 0.0013 |
| rs73389891  | 7  | 54,367,170  | A | G | 0.0733 | -0.0139 | 0.0020 |
| rs6451704   | 5  | 43,475,862  | T | C | 0.5271 | -0.0073 | 0.0010 |
| rs77538769  | 12 | 122,187,824 | A | C | 0.9516 | 0.0195  | 0.0028 |
| rs36120534  | 20 | 17,438,121  | T | C | 0.1819 | 0.0094  | 0.0014 |
| rs5765717   | 22 | 44,917,646  | T | G | 0.4867 | -0.0072 | 0.0010 |
| rs11011932  | 10 | 20,576,790  | T | C | 0.2329 | 0.0086  | 0.0012 |
| rs72744579  | 15 | 77,864,785  | T | C | 0.0491 | 0.0169  | 0.0024 |
| rs6013574   | 20 | 51,563,060  | T | C | 0.0633 | 0.0149  | 0.0021 |
| rs11192616  | 10 | 107,577,714 | T | C | 0.3543 | 0.0076  | 0.0011 |
| rs4147707   | 2  | 207,024,107 | C | G | 0.4073 | 0.0074  | 0.0011 |
| rs6909292   | 6  | 108,093,580 | T | C | 0.5169 | 0.0072  | 0.0010 |
| rs351720    | 6  | 109,551,147 | A | G | 0.6851 | -0.0078 | 0.0011 |
| rs10521132  | 16 | 25,720,836  | A | G | 0.25   | -0.0084 | 0.0012 |
| rs2750097   | 20 | 49,729,130  | A | G | 0.5883 | -0.0073 | 0.0011 |
| rs975210    | 15 | 70,364,352  | A | G | 0.171  | -0.0096 | 0.0014 |
| rs1290505   | 1  | 163,680,402 | A | G | 0.41   | 0.0073  | 0.0011 |
| rs7237773   | 18 | 50,779,810  | A | C | 0.9021 | -0.0122 | 0.0018 |
| rs252947    | 5  | 160,715,878 | A | G | 0.3319 | 0.0077  | 0.0011 |
| rs72911669  | 2  | 193,797,227 | C | G | 0.0547 | 0.0162  | 0.0023 |
| rs34140181  | 6  | 35,118,056  | T | C | 0.6821 | 0.0090  | 0.0013 |
| rs899223    | 19 | 13,157,151  | C | G | 0.0811 | 0.0133  | 0.0019 |
| rs139453187 | 7  | 72,155,834  | T | C | 0.9261 | 0.0140  | 0.0020 |
| rs74664784  | 3  | 85,475,292  | T | C | 0.4365 | -0.0084 | 0.0012 |
| rs1883322   | 6  | 35,369,806  | T | C | 0.7538 | 0.0084  | 0.0012 |
| rs7546304   | 1  | 151,114,484 | C | G | 0.3012 | -0.0079 | 0.0011 |
| rs792213    | 10 | 90,174,202  | A | C | 0.4133 | 0.0073  | 0.0011 |
| rs17523342  | 11 | 115,311,131 | T | C | 0.812  | 0.0092  | 0.0013 |
| rs7560633   | 2  | 27,342,067  | C | G | 0.3595 | 0.0075  | 0.0011 |
| rs4778691   | 15 | 83,508,278  | A | T | 0.483  | -0.0072 | 0.0010 |
| rs9857331   | 3  | 177,191,935 | A | G | 0.7294 | -0.0081 | 0.0012 |
| rs9871964   | 3  | 178,374,095 | T | C | 0.1745 | -0.0095 | 0.0014 |
| rs378342    | 15 | 70,186,171  | T | C | 0.2675 | -0.0081 | 0.0012 |
| rs7412683   | 1  | 74,175,798  | C | G | 0.5893 | -0.0073 | 0.0011 |
| rs76829263  | 3  | 46,747,457  | T | C | 0.0225 | 0.0246  | 0.0036 |
| rs6428152   | 1  | 193,129,154 | A | G | 0.2775 | -0.0081 | 0.0012 |
| rs11595166  | 10 | 4,811,925   | T | C | 0.0813 | 0.0132  | 0.0019 |
| rs13076876  | 3  | 85,704,118  | T | G | 0.5314 | -0.0072 | 0.0010 |

|             |    |             |   |   |        |         |        |
|-------------|----|-------------|---|---|--------|---------|--------|
| rs2542673   | 16 | 54,206,715  | A | C | 0.3222 | 0.0077  | 0.0011 |
| rs801652    | 22 | 47,202,691  | T | C | 0.7286 | 0.0081  | 0.0012 |
| rs1843815   | 1  | 98,589,715  | A | T | 0.4692 | 0.0072  | 0.0010 |
| rs62515110  | 8  | 81,560,138  | T | C | 0.811  | 0.0093  | 0.0013 |
| rs7614270   | 3  | 35,025,388  | A | C | 0.1481 | -0.0102 | 0.0015 |
| rs707064    | 2  | 155,293,869 | T | C | 0.0747 | 0.0137  | 0.0020 |
| rs6766759   | 3  | 68,577,979  | A | C | 0.5362 | 0.0072  | 0.0010 |
| rs116656374 | 3  | 49,413,266  | T | G | 0.0381 | -0.0191 | 0.0028 |
| rs12314891  | 12 | 99,578,434  | A | G | 0.7338 | -0.0081 | 0.0012 |
| rs7313065   | 12 | 53,471,218  | A | C | 0.171  | -0.0096 | 0.0014 |
| rs852388    | 7  | 5,574,239   | C | G | 0.2103 | -0.0089 | 0.0013 |
| rs4790841   | 17 | 1,835,482   | T | C | 0.154  | 0.0100  | 0.0015 |
| rs4709995   | 6  | 166,313,447 | T | C | 0.3957 | -0.0074 | 0.0011 |
| rs76010712  | 2  | 233,766,097 | A | G | 0.0863 | -0.0128 | 0.0019 |
| rs1492014   | 3  | 94,071,481  | T | C | 0.5767 | 0.0073  | 0.0011 |
| rs2224427   | 20 | 58,736,133  | A | G | 0.4712 | -0.0072 | 0.0010 |
| rs6035877   | 20 | 21,512,532  | A | C | 0.5342 | 0.0072  | 0.0010 |
| rs17249745  | 4  | 102,547,366 | A | G | 0.9629 | 0.0193  | 0.0028 |
| rs182308457 | 3  | 51,633,133  | A | C | 0.016  | -0.0291 | 0.0042 |
| rs516051    | 17 | 27,882,705  | A | C | 0.4731 | 0.0072  | 0.0010 |
| rs3889488   | 8  | 141,544,748 | A | G | 0.7195 | 0.0080  | 0.0012 |
| rs2848780   | 18 | 39,149,367  | A | G | 0.2717 | -0.0081 | 0.0012 |
| rs28807191  | 7  | 29,830,331  | T | C | 0.5588 | -0.0072 | 0.0011 |
| rs72883341  | 2  | 166,637,845 | T | C | 0.1588 | 0.0098  | 0.0014 |
| rs187263396 | 3  | 50,831,923  | A | G | 0.9931 | 0.0442  | 0.0064 |
| rs7307965   | 12 | 23,132,669  | A | G | 0.4791 | -0.0072 | 0.0010 |
| rs4391653   | 1  | 241,342,291 | T | C | 0.2621 | -0.0082 | 0.0012 |
| rs2076312   | 6  | 33,142,162  | A | C | 0.1646 | -0.0097 | 0.0014 |
| rs62053970  | 16 | 72,352,479  | C | G | 0.9598 | -0.0183 | 0.0027 |
| rs6122735   | 20 | 47,523,732  | T | C | 0.3927 | 0.0073  | 0.0011 |
| rs77370942  | 13 | 58,037,032  | A | G | 0.0727 | -0.0138 | 0.0020 |
| rs10965665  | 9  | 23,142,146  | A | G | 0.29   | -0.0084 | 0.0012 |
| rs7232954   | 18 | 44,015,643  | T | C | 0.6951 | 0.0078  | 0.0011 |
| rs13130765  | 4  | 45,163,333  | C | G | 0.4734 | -0.0072 | 0.0011 |
| rs77926719  | 12 | 74,905,602  | A | G | 0.1216 | 0.0110  | 0.0016 |
| rs4358291   | 3  | 187,501,864 | A | T | 0.884  | 0.0112  | 0.0016 |
| rs28610468  | 7  | 14,849,333  | A | T | 0.2048 | -0.0089 | 0.0013 |
| rs17369403  | 11 | 29,316,372  | C | G | 0.0257 | 0.0228  | 0.0033 |
| rs72838256  | 2  | 124,964,604 | A | C | 0.012  | 0.0332  | 0.0048 |
| rs133082    | 22 | 41,090,554  | T | C | 0.5672 | -0.0072 | 0.0011 |
| rs9869597   | 3  | 153,905,784 | A | T | 0.7858 | -0.0087 | 0.0013 |
| rs76395018  | 7  | 44,376,661  | A | T | 0.8239 | -0.0094 | 0.0014 |
| rs78667595  | 13 | 109,706,967 | A | G | 0.0917 | -0.0125 | 0.0018 |
| rs6502670   | 17 | 1,328,381   | T | G | 0.6201 | -0.0075 | 0.0011 |
| rs10852028  | 15 | 38,942,641  | T | C | 0.5245 | 0.0072  | 0.0010 |
| rs2364972   | 17 | 65,475,332  | A | G | 0.5435 | 0.0072  | 0.0011 |
| rs13336754  | 16 | 24,801,979  | T | C | 0.2701 | -0.0081 | 0.0012 |
| rs2787376   | 9  | 103,057,721 | A | G | 0.9003 | -0.0120 | 0.0018 |

|             |    |             |   |   |        |         |        |
|-------------|----|-------------|---|---|--------|---------|--------|
| rs8094360   | 18 | 40,470,953  | A | G | 0.1333 | -0.0105 | 0.0015 |
| rs6091534   | 20 | 51,064,283  | T | C | 0.3794 | 0.0074  | 0.0011 |
| rs4654441   | 1  | 4,566,515   | A | G | 0.5755 | 0.0072  | 0.0011 |
| rs8136156   | 22 | 43,309,509  | A | G | 0.5534 | 0.0079  | 0.0012 |
| rs10911678  | 1  | 185,081,903 | T | C | 0.5823 | -0.0073 | 0.0011 |
| rs1126472   | 6  | 12,125,772  | A | G | 0.8919 | 0.0115  | 0.0017 |
| rs10910949  | 1  | 181,495,801 | T | C | 0.2099 | 0.0088  | 0.0013 |
| rs1786313   | 8  | 101,737,075 | T | C | 0.3137 | 0.0077  | 0.0011 |
| rs79409011  | 7  | 39,433,817  | C | G | 0.0644 | 0.0146  | 0.0021 |
| rs6545559   | 2  | 56,450,431  | T | C | 0.3196 | -0.0077 | 0.0011 |
| rs2222760   | 2  | 151,345,113 | A | G | 0.2826 | -0.0079 | 0.0012 |
| rs35125     | 12 | 46,274,858  | A | G | 0.5129 | -0.0072 | 0.0010 |
| rs41282553  | 22 | 31,286,928  | A | G | 0.0303 | 0.0210  | 0.0031 |
| rs2585183   | 8  | 143,766,059 | C | G | 0.5654 | -0.0072 | 0.0011 |
| rs112579674 | 8  | 93,722,821  | C | G | 0.8177 | 0.0093  | 0.0014 |
| rs587021    | 1  | 77,093,011  | T | G | 0.5805 | 0.0072  | 0.0011 |
| rs7814757   | 8  | 10,675,188  | T | C | 0.4013 | -0.0073 | 0.0011 |
| rs3817923   | 1  | 171,809,211 | A | G | 0.1132 | -0.0113 | 0.0017 |
| rs56374036  | 20 | 46,367,372  | A | G | 0.7872 | -0.0088 | 0.0013 |
| rs35683183  | 8  | 22,557,932  | A | G | 0.2136 | 0.0087  | 0.0013 |
| rs1879753   | 4  | 17,105,693  | A | G | 0.5786 | -0.0072 | 0.0011 |
| rs17812330  | 6  | 140,335,268 | T | G | 0.2604 | -0.0081 | 0.0012 |
| rs10074178  | 5  | 93,927,705  | A | G | 0.5169 | 0.0071  | 0.0010 |
| rs7680258   | 4  | 31,890,470  | T | C | 0.4237 | 0.0072  | 0.0011 |
| rs34770282  | 9  | 23,820,001  | A | G | 0.8974 | -0.0118 | 0.0017 |
| rs10200498  | 2  | 35,836,509  | A | G | 0.3227 | -0.0076 | 0.0011 |
| rs10042222  | 5  | 77,412,854  | T | C | 0.6871 | -0.0078 | 0.0011 |
| rs12050945  | 16 | 62,719,991  | C | G | 0.7575 | -0.0083 | 0.0012 |
| rs4867608   | 5  | 169,936,414 | A | T | 0.695  | 0.0078  | 0.0011 |
| rs150228862 | 4  | 102,949,070 | T | C | 0.0119 | -0.0344 | 0.0051 |
| rs62532760  | 9  | 14,246,939  | C | G | 0.663  | -0.0076 | 0.0011 |
| rs61871134  | 10 | 104,330,990 | A | G | 0.9343 | -0.0145 | 0.0021 |
| rs35452994  | 3  | 14,510,442  | A | G | 0.1957 | -0.0091 | 0.0013 |
| rs273028    | 18 | 30,685,176  | A | T | 0.0751 | -0.0135 | 0.0020 |
| rs2565059   | 8  | 27,336,978  | A | G | 0.1998 | 0.0089  | 0.0013 |
| rs7157298   | 14 | 56,581,075  | A | T | 0.5296 | 0.0071  | 0.0010 |
| rs891935    | 5  | 149,639,013 | A | G | 0.4507 | -0.0072 | 0.0011 |
| rs61537885  | 16 | 75,620,118  | T | C | 0.9477 | -0.0177 | 0.0026 |
| rs10054614  | 5  | 56,662,437  | A | G | 0.4592 | -0.0072 | 0.0011 |
| rs73039077  | 3  | 17,036,387  | C | G | 0.2441 | 0.0083  | 0.0012 |
| rs3948593   | 17 | 7,615,364   | T | C | 0.1628 | -0.0097 | 0.0014 |
| rs62090515  | 18 | 42,671,636  | A | G | 0.3547 | -0.0074 | 0.0011 |
| rs185248842 | 6  | 27,664,820  | T | C | 0.0276 | 0.0221  | 0.0033 |
| rs74441911  | 18 | 53,037,705  | T | C | 0.977  | 0.0243  | 0.0036 |
| rs740886    | 7  | 14,813,586  | T | G | 0.1371 | 0.0104  | 0.0015 |
| rs186070804 | 12 | 121,263,788 | A | C | 0.739  | -0.0094 | 0.0014 |
| rs4664980   | 2  | 159,439,911 | T | C | 0.797  | 0.0088  | 0.0013 |
| rs35560901  | 13 | 67,054,045  | A | G | 0.3231 | 0.0076  | 0.0011 |

|             |    |             |   |   |        |         |        |
|-------------|----|-------------|---|---|--------|---------|--------|
| rs66527557  | 8  | 88,008,175  | T | G | 0.2781 | -0.0079 | 0.0012 |
| rs4848732   | 2  | 122,633,487 | A | G | 0.446  | -0.0072 | 0.0011 |
| rs13077567  | 3  | 117,174,468 | A | G | 0.6801 | 0.0076  | 0.0011 |
| rs16962221  | 16 | 13,602,800  | A | G | 0.3449 | 0.0075  | 0.0011 |
| rs11235569  | 11 | 72,405,545  | A | C | 0.542  | -0.0071 | 0.0011 |
| rs79708660  | 10 | 75,785,466  | A | G | 0.2255 | -0.0087 | 0.0013 |
| rs11607466  | 11 | 134,068,655 | T | C | 0.1032 | -0.0117 | 0.0017 |
| rs34604401  | 5  | 157,337,150 | C | G | 0.5464 | -0.0071 | 0.0011 |
| rs2637609   | 4  | 130,634,423 | A | G | 0.738  | 0.0081  | 0.0012 |
| rs574967    | 12 | 120,227,740 | A | G | 0.3273 | 0.0076  | 0.0011 |
| rs17666845  | 2  | 144,816,988 | A | G | 0.6944 | -0.0077 | 0.0011 |
| rs75810494  | 2  | 103,989,798 | A | T | 0.045  | 0.0174  | 0.0026 |
| rs2424637   | 20 | 24,717,108  | A | G | 0.6191 | 0.0073  | 0.0011 |
| rs12034740  | 1  | 1,728,969   | A | C | 0.4987 | 0.0071  | 0.0010 |
| rs67829508  | 2  | 120,847,642 | A | G | 0.1855 | -0.0092 | 0.0014 |
| rs232042    | 2  | 179,050,008 | A | G | 0.4397 | -0.0072 | 0.0011 |
| rs117849041 | 19 | 2,312,903   | T | C | 0.1052 | 0.0116  | 0.0017 |
| rs4739235   | 8  | 21,287,105  | A | G | 0.1699 | 0.0094  | 0.0014 |
| rs10401329  | 19 | 1,871,699   | A | G | 0.1205 | 0.0109  | 0.0016 |
| rs3092073   | 20 | 44,595,649  | A | G | 0.4573 | -0.0071 | 0.0011 |
| rs77901523  | 20 | 55,533,146  | C | G | 0.0345 | 0.0194  | 0.0029 |
| rs72890073  | 18 | 37,983,849  | A | C | 0.918  | -0.0129 | 0.0019 |
| rs6508332   | 18 | 22,405,933  | T | C | 0.7444 | 0.0081  | 0.0012 |
| rs13025467  | 2  | 173,797,297 | A | G | 0.6724 | -0.0076 | 0.0011 |
| rs7240100   | 18 | 53,723,563  | A | G | 0.614  | 0.0073  | 0.0011 |
| rs6680315   | 1  | 94,370,519  | C | G | 0.6629 | 0.0075  | 0.0011 |
| rs17062621  | 4  | 177,131,268 | A | G | 0.692  | -0.0077 | 0.0011 |
| rs72676302  | 14 | 36,912,454  | T | C | 0.0452 | 0.0171  | 0.0025 |
| rs11897647  | 2  | 138,451,864 | T | C | 0.1811 | 0.0092  | 0.0014 |
| rs13121486  | 4  | 101,597,411 | A | G | 0.334  | -0.0075 | 0.0011 |
| rs75931210  | 2  | 80,540,462  | T | C | 0.9653 | 0.0194  | 0.0029 |
| rs4964731   | 12 | 109,057,809 | A | C | 0.4815 | -0.0071 | 0.0010 |
| rs55972083  | 1  | 2,704,918   | T | G | 0.2153 | -0.0087 | 0.0013 |
| rs6539284   | 12 | 79,592,680  | T | C | 0.5931 | -0.0072 | 0.0011 |
| rs1470801   | 3  | 83,512,237  | A | G | 0.1952 | -0.0089 | 0.0013 |
| rs11942352  | 4  | 112,410,355 | A | G | 0.8053 | -0.0089 | 0.0013 |
| rs419438    | 22 | 20,166,723  | T | G | 0.5395 | -0.0071 | 0.0011 |
| rs66671632  | 8  | 143,680,772 | T | C | 0.1338 | -0.0104 | 0.0015 |
| rs12709063  | 16 | 60,686,987  | A | G | 0.4925 | -0.0071 | 0.0010 |
| rs7072319   | 10 | 68,648,238  | T | C | 0.494  | -0.0071 | 0.0010 |
| rs10757463  | 9  | 23,967,940  | A | G | 0.484  | -0.0071 | 0.0010 |
| rs111530150 | 13 | 54,342,123  | T | C | 0.0195 | 0.0257  | 0.0038 |
| rs9597852   | 13 | 59,366,117  | A | G | 0.1052 | 0.0115  | 0.0017 |
| rs181478    | 14 | 69,354,871  | T | G | 0.6338 | 0.0073  | 0.0011 |
| rs1424203   | 16 | 60,798,217  | T | C | 0.3509 | -0.0074 | 0.0011 |
| rs12028526  | 1  | 101,013,734 | T | G | 0.5576 | 0.0071  | 0.0011 |
| rs72836354  | 17 | 44,899,464  | A | G | 0.4782 | 0.0071  | 0.0011 |
| rs2584240   | 15 | 96,267,139  | A | T | 0.8912 | -0.0113 | 0.0017 |

|             |    |             |   |   |        |         |        |
|-------------|----|-------------|---|---|--------|---------|--------|
| rs17241659  | 3  | 108,051,504 | A | G | 0.2282 | -0.0084 | 0.0013 |
| rs34959417  | 4  | 750,492     | T | C | 0.2868 | -0.0078 | 0.0012 |
| rs9539905   | 13 | 64,614,019  | T | C | 0.5961 | 0.0072  | 0.0011 |
| rs66488846  | 7  | 48,783,897  | A | T | 0.4418 | 0.0071  | 0.0011 |
| rs1516036   | 12 | 61,786,763  | A | G | 0.5374 | 0.0071  | 0.0010 |
| rs75740317  | 2  | 98,611,624  | T | C | 0.9764 | 0.0234  | 0.0035 |
| rs36187472  | 8  | 85,952,208  | A | G | 0.6685 | 0.0075  | 0.0011 |
| rs2241722   | 19 | 46,119,867  | A | C | 0.3233 | 0.0076  | 0.0011 |
| rs3913942   | 3  | 21,486,799  | A | G | 0.643  | 0.0074  | 0.0011 |
| rs35136321  | 7  | 131,859,817 | A | G | 0.7137 | -0.0078 | 0.0012 |
| rs10913420  | 1  | 177,759,645 | T | C | 0.1726 | 0.0093  | 0.0014 |
| rs12569163  | 1  | 241,878,547 | T | G | 0.7883 | -0.0123 | 0.0018 |
| rs517674    | 9  | 76,908,607  | C | G | 0.2644 | 0.0080  | 0.0012 |
| rs28438078  | 1  | 34,024,672  | A | G | 0.1584 | -0.0096 | 0.0014 |
| rs11082220  | 18 | 38,718,651  | A | C | 0.8472 | -0.0098 | 0.0015 |
| rs1536488   | 13 | 66,664,090  | A | G | 0.6566 | 0.0074  | 0.0011 |
| rs903981    | 5  | 178,390,237 | T | G | 0.4122 | -0.0072 | 0.0011 |
| rs113014815 | 6  | 27,155,588  | T | G | 0.9448 | 0.0157  | 0.0023 |
| rs7531138   | 1  | 97,923,499  | A | T | 0.4487 | 0.0071  | 0.0011 |
| rs7921010   | 10 | 104,192,826 | T | G | 0.1991 | -0.0088 | 0.0013 |
| rs1885857   | 13 | 101,179,292 | A | G | 0.2649 | -0.0080 | 0.0012 |
| rs2517063   | 8  | 17,013,640  | A | C | 0.5438 | 0.0071  | 0.0011 |
| rs12201105  | 6  | 152,812,569 | A | G | 0.8626 | -0.0102 | 0.0015 |
| rs6937736   | 6  | 97,399,772  | C | G | 0.1847 | 0.0091  | 0.0013 |
| rs32938     | 5  | 141,132,662 | T | C | 0.7734 | 0.0084  | 0.0013 |
| rs2969584   | 2  | 144,371,034 | T | C | 0.4989 | -0.0070 | 0.0010 |
| rs4656013   | 1  | 88,604,157  | T | C | 0.5799 | 0.0072  | 0.0011 |
| rs75782645  | 3  | 44,940,602  | A | G | 0.8756 | -0.0107 | 0.0016 |
| rs8044082   | 16 | 6,603,021   | T | C | 0.3995 | 0.0072  | 0.0011 |
| rs10922326  | 1  | 197,867,662 | T | G | 0.8442 | -0.0097 | 0.0014 |
| rs59615734  | 5  | 139,411,146 | T | C | 0.8311 | 0.0094  | 0.0014 |
| rs2362462   | 7  | 139,760,010 | T | C | 0.6002 | -0.0072 | 0.0011 |
| rs116979995 | 10 | 104,949,734 | T | C | 0.0445 | 0.0171  | 0.0026 |
| rs11719842  | 3  | 126,999,800 | A | G | 0.2347 | 0.0096  | 0.0014 |
| rs62166785  | 2  | 124,468,439 | A | G | 0.1504 | 0.0099  | 0.0015 |
| rs2498018   | 1  | 208,270,481 | C | G | 0.1912 | -0.0089 | 0.0013 |
| rs10740572  | 10 | 55,838,740  | A | T | 0.7773 | -0.0084 | 0.0013 |
| rs2555506   | 3  | 168,197,090 | A | G | 0.1769 | 0.0093  | 0.0014 |
| rs7601784   | 2  | 139,470,731 | A | G | 0.1339 | 0.0103  | 0.0015 |
| rs322547    | 18 | 49,137,585  | A | G | 0.273  | -0.0079 | 0.0012 |
| rs7585653   | 2  | 61,046,062  | A | G | 0.7003 | -0.0077 | 0.0011 |
| rs117401505 | 8  | 87,640,494  | A | T | 0.9328 | 0.0140  | 0.0021 |
| rs4378284   | 10 | 68,615,277  | A | C | 0.2666 | -0.0079 | 0.0012 |
| rs1119258   | 11 | 99,661,654  | T | G | 0.3784 | -0.0072 | 0.0011 |
| rs4554425   | 8  | 135,498,629 | T | C | 0.4864 | 0.0070  | 0.0010 |
| rs1609309   | 15 | 55,351,559  | A | T | 0.4368 | -0.0071 | 0.0011 |
| rs357564    | 9  | 98,209,594  | A | G | 0.3362 | -0.0075 | 0.0011 |
| rs35581250  | 4  | 181,289,859 | C | G | 0.8192 | -0.0092 | 0.0014 |

|             |    |             |   |   |        |         |        |
|-------------|----|-------------|---|---|--------|---------|--------|
| rs11460264  | 3  | 46,979,483  | A | G | 0.9795 | -0.0252 | 0.0038 |
| rs265981    | 5  | 174,870,902 | A | G | 0.3796 | 0.0072  | 0.0011 |
| rs116547571 | 2  | 174,927,503 | A | G | 0.0183 | -0.0264 | 0.0039 |
| rs34822565  | 3  | 71,483,054  | T | G | 0.121  | -0.0108 | 0.0016 |
| rs6958592   | 7  | 114,702,840 | T | C | 0.459  | 0.0070  | 0.0011 |
| rs10206079  | 2  | 171,188,108 | T | G | 0.358  | 0.0073  | 0.0011 |
| rs61757207  | 16 | 70,358,495  | A | G | 0.9859 | 0.0353  | 0.0053 |
| rs11629584  | 15 | 90,128,966  | T | C | 0.5118 | 0.0070  | 0.0010 |
| rs57524335  | 7  | 122,773,220 | A | T | 0.6047 | -0.0072 | 0.0011 |
| rs76412890  | 3  | 118,771,199 | T | C | 0.2403 | -0.0082 | 0.0012 |
| rs77311515  | 2  | 100,851,105 | A | G | 0.9461 | -0.0156 | 0.0023 |
| rs66818657  | 15 | 68,000,491  | A | G | 0.8514 | -0.0098 | 0.0015 |
| rs6472213   | 8  | 66,508,336  | T | C | 0.3304 | -0.0074 | 0.0011 |
| rs4367098   | 3  | 49,219,669  | T | C | 0.621  | 0.0072  | 0.0011 |
| rs7842016   | 8  | 115,745,215 | C | G | 0.7254 | 0.0078  | 0.0012 |
| rs62267594  | 3  | 129,343,312 | C | G | 0.0878 | 0.0124  | 0.0019 |
| rs74491040  | 20 | 40,204,399  | T | C | 0.012  | -0.0322 | 0.0048 |
| rs1357913   | 8  | 83,674,246  | A | G | 0.5839 | 0.0071  | 0.0011 |
| rs73695675  | 7  | 39,191,427  | T | G | 0.0733 | -0.0134 | 0.0020 |
| rs8039549   | 15 | 83,246,718  | A | G | 0.3682 | 0.0073  | 0.0011 |
| rs654880    | 22 | 20,946,457  | A | G | 0.2224 | -0.0084 | 0.0013 |
| rs543714    | 11 | 90,057,949  | T | C | 0.3016 | -0.0076 | 0.0011 |
| rs73552348  | 6  | 115,834,046 | A | G | 0.9032 | -0.0118 | 0.0018 |
| rs830622    | 3  | 71,677,817  | T | C | 0.8318 | 0.0093  | 0.0014 |
| rs1553666   | 8  | 9,881,789   | T | C | 0.6478 | 0.0073  | 0.0011 |
| rs1858552   | 1  | 72,316,000  | T | G | 0.0717 | -0.0136 | 0.0020 |
| rs7654288   | 4  | 38,593,487  | A | G | 0.5224 | -0.0070 | 0.0010 |
| rs9949224   | 18 | 63,871,313  | A | G | 0.5121 | 0.0070  | 0.0010 |
| rs4616497   | 2  | 103,469,980 | T | C | 0.3255 | 0.0075  | 0.0011 |
| rs9372526   | 6  | 98,199,481  | A | C | 0.2582 | -0.0080 | 0.0012 |
| rs11505217  | 7  | 155,560,120 | A | C | 0.8389 | 0.0095  | 0.0014 |
| rs2003850   | 5  | 167,844,095 | T | C | 0.3212 | 0.0075  | 0.0011 |
| rs10891825  | 11 | 115,173,171 | T | C | 0.6359 | -0.0073 | 0.0011 |
| rs28468603  | 9  | 126,507,274 | T | C | 0.1089 | -0.0112 | 0.0017 |
| rs11899423  | 2  | 181,483,750 | A | C | 0.1876 | -0.0089 | 0.0013 |
| rs6740731   | 2  | 145,270,592 | A | G | 0.1551 | -0.0097 | 0.0014 |
| rs3099082   | 2  | 55,586,647  | T | G | 0.5673 | 0.0070  | 0.0011 |
| rs2867932   | 15 | 78,591,037  | A | G | 0.3907 | 0.0071  | 0.0011 |
| rs19169526  | 14 | 29,648,396  | C | G | 0.0069 | -0.0430 | 0.0065 |
| rs76493593  | 2  | 215,143,466 | A | G | 0.1345 | 0.0102  | 0.0015 |
| rs6858933   | 5  | 145,546,417 | A | T | 0.3599 | 0.0084  | 0.0013 |
| rs6788064   | 3  | 143,476,411 | A | G | 0.4898 | -0.0070 | 0.0010 |
| rs1323110   | 13 | 53,558,303  | A | G | 0.6877 | -0.0075 | 0.0011 |
| rs1043207   | 14 | 23,369,994  | A | G | 0.2835 | -0.0085 | 0.0013 |
| rs567775    | 5  | 4,038,358   | T | C | 0.4947 | 0.0070  | 0.0010 |
| rs72671469  | 14 | 29,678,837  | A | G | 0.8911 | 0.0112  | 0.0017 |
| rs72787078  | 16 | 72,158,493  | T | C | 0.1654 | 0.0094  | 0.0014 |
| rs7222252   | 17 | 37,447,218  | T | C | 0.9679 | 0.0209  | 0.0031 |

|             |    |             |   |   |        |         |        |
|-------------|----|-------------|---|---|--------|---------|--------|
| rs11681881  | 2  | 25,444,521  | A | G | 0.8651 | -0.0103 | 0.0015 |
| rs1522927   | 2  | 73,556,155  | T | G | 0.6929 | 0.0076  | 0.0011 |
| rs11111443  | 12 | 103,495,380 | A | G | 0.6334 | 0.0072  | 0.0011 |
| rs11834096  | 12 | 17,023,999  | A | G | 0.6164 | 0.0072  | 0.0011 |
| rs2039204   | 9  | 130,371,107 | A | T | 0.5318 | 0.0070  | 0.0010 |
| rs10190799  | 2  | 72,392,588  | A | T | 0.6271 | -0.0072 | 0.0011 |
| rs7587055   | 2  | 34,132,742  | A | G | 0.4617 | -0.0070 | 0.0010 |
| rs1338955   | 10 | 109,059,174 | A | G | 0.0762 | -0.0131 | 0.0020 |
| rs111999549 | 2  | 156,582,930 | T | C | 0.0103 | 0.0346  | 0.0052 |
| rs938454    | 5  | 66,342,746  | T | G | 0.3931 | -0.0071 | 0.0011 |
| rs138933558 | 9  | 14,128,526  | A | G | 0.0578 | 0.0151  | 0.0023 |
| rs2071387   | 3  | 139,257,603 | A | G | 0.8179 | 0.0090  | 0.0014 |
| rs13169187  | 5  | 51,716,957  | A | G | 0.5398 | -0.0070 | 0.0010 |
| rs10183564  | 2  | 185,188,572 | T | C | 0.1973 | -0.0087 | 0.0013 |
| rs10983486  | 9  | 119,824,033 | A | C | 0.5758 | 0.0070  | 0.0011 |
| rs4679353   | 3  | 126,942,635 | A | G | 0.6201 | 0.0072  | 0.0011 |
| rs9993049   | 4  | 4,446,985   | T | C | 0.6201 | -0.0072 | 0.0011 |
| rs2271593   | 2  | 220,168,607 | T | C | 0.1533 | 0.0097  | 0.0015 |
| rs238678    | 16 | 1,872,722   | A | G | 0.1483 | 0.0098  | 0.0015 |
| rs9272732   | 6  | 32,609,647  | T | G | 0.7077 | 0.0091  | 0.0014 |
| rs2589019   | 18 | 36,957,555  | A | G | 0.2456 | -0.0081 | 0.0012 |
| rs6472530   | 8  | 71,371,142  | A | T | 0.6508 | -0.0073 | 0.0011 |
| rs2550218   | 16 | 60,127,249  | A | G | 0.4125 | 0.0071  | 0.0011 |
| rs12923809  | 16 | 63,589,939  | T | C | 0.5807 | 0.0071  | 0.0011 |
| rs76727996  | 6  | 162,438,723 | T | C | 0.0735 | 0.0133  | 0.0020 |
| rs371425    | 11 | 131,408,517 | T | G | 0.2086 | -0.0086 | 0.0013 |
| rs13247102  | 7  | 8,027,353   | C | G | 0.1991 | -0.0087 | 0.0013 |
| rs4405446   | 13 | 59,204,204  | T | C | 0.5842 | 0.0070  | 0.0011 |
| rs9644936   | 9  | 121,074,823 | A | G | 0.7717 | 0.0083  | 0.0012 |
| rs6534293   | 4  | 80,202,960  | A | G | 0.4391 | 0.0070  | 0.0011 |
| rs11571404  | 12 | 1,041,450   | T | C | 0.1971 | 0.0088  | 0.0013 |
| rs2726471   | 4  | 106,335,490 | T | G | 0.3343 | -0.0074 | 0.0011 |
| rs11783263  | 8  | 19,371,674  | C | G | 0.6471 | 0.0073  | 0.0011 |
| rs150470230 | 11 | 73,466,863  | A | G | 0.9723 | 0.0214  | 0.0032 |
| rs41741     | 7  | 116,438,511 | T | G | 0.6694 | 0.0074  | 0.0011 |
| rs36116433  | 2  | 236,979,552 | T | C | 0.4525 | -0.0070 | 0.0011 |
| rs4390219   | 1  | 32,267,747  | T | C | 0.3133 | -0.0075 | 0.0011 |
| rs6883584   | 5  | 89,160,559  | T | G | 0.1283 | 0.0104  | 0.0016 |
| rs11578181  | 1  | 208,323,140 | T | G | 0.6944 | -0.0075 | 0.0011 |
| rs138729018 | 10 | 134,094,519 | T | C | 0.0449 | -0.0171 | 0.0026 |
| rs78842400  | 2  | 58,127,631  | T | C | 0.0651 | -0.0141 | 0.0021 |
| rs17631311  | 4  | 135,331,985 | C | G | 0.5893 | 0.0070  | 0.0011 |
| rs12972944  | 19 | 12,713,808  | A | G | 0.684  | 0.0075  | 0.0011 |
| rs2066490   | 11 | 67,160,933  | A | G | 0.1723 | -0.0106 | 0.0016 |
| rs7043998   | 9  | 81,650,648  | A | G | 0.074  | 0.0132  | 0.0020 |
| rs8073654   | 17 | 74,746,425  | T | C | 0.567  | 0.0070  | 0.0011 |
| rs1611637   | 6  | 29,836,741  | A | G | 0.422  | 0.0071  | 0.0011 |
| rs1659298   | 15 | 55,836,352  | A | G | 0.4406 | 0.0070  | 0.0011 |

|            |    |             |   |   |        |         |        |
|------------|----|-------------|---|---|--------|---------|--------|
| rs76555305 | 8  | 118,807,350 | A | G | 0.0314 | -0.0204 | 0.0031 |
| rs2423855  | 20 | 14,915,305  | T | C | 0.7224 | 0.0077  | 0.0012 |
| rs4858241  | 3  | 20,669,071  | T | G | 0.6323 | -0.0072 | 0.0011 |
| rs67669707 | 10 | 134,094,206 | A | C | 0.4143 | 0.0070  | 0.0011 |
| rs6027896  | 20 | 59,454,810  | T | C | 0.6717 | 0.0074  | 0.0011 |
| rs10732635 | 1  | 114,519,351 | T | G | 0.5597 | 0.0070  | 0.0011 |
| rs35739581 | 2  | 8,088,520   | T | C | 0.9179 | 0.0130  | 0.0020 |
| rs6428586  | 1  | 90,825,173  | A | G | 0.6356 | 0.0072  | 0.0011 |
| rs72778512 | 5  | 81,514,511  | C | G | 0.9123 | -0.0122 | 0.0019 |
| rs17184588 | 1  | 24,365,512  | T | C | 0.513  | -0.0069 | 0.0010 |
| rs41278381 | 9  | 111,962,792 | T | C | 0.9605 | -0.0179 | 0.0027 |
| rs10819974 | 9  | 104,422,344 | T | C | 0.2356 | -0.0081 | 0.0012 |
| rs4662573  | 2  | 127,941,798 | T | C | 0.5362 | 0.0069  | 0.0010 |
| rs9374194  | 6  | 111,000,185 | T | C | 0.8101 | -0.0088 | 0.0013 |
| rs11459067 | 1  | 243,817,723 | A | T | 0.0142 | -0.0295 | 0.0045 |
| rs591540   | 1  | 72,331,815  | T | G | 0.4965 | 0.0069  | 0.0010 |
| rs10752160 | 10 | 9,429,096   | T | C | 0.2965 | -0.0076 | 0.0011 |
| rs13175194 | 5  | 177,037,610 | T | C | 0.6577 | -0.0073 | 0.0011 |
| rs6721505  | 2  | 36,578,013  | A | G | 0.3275 | 0.0074  | 0.0011 |
| rs287275   | 5  | 55,723,936  | T | C | 0.3446 | -0.0073 | 0.0011 |
| rs9427388  | 1  | 161,443,086 | T | C | 0.0804 | -0.0128 | 0.0019 |
| rs11576614 | 1  | 43,798,234  | T | G | 0.0616 | 0.0146  | 0.0022 |
| rs13909730 | 6  | 19,223,665  | A | C | 0.784  | 0.0084  | 0.0013 |
| rs7437726  | 4  | 114,980,228 | T | G | 0.1273 | 0.0104  | 0.0016 |
| rs1544     | 21 | 33,085,585  | A | G | 0.2713 | -0.0078 | 0.0012 |
| rs578527   | 15 | 46,945,976  | A | G | 0.6742 | 0.0074  | 0.0011 |
| rs73874322 | 3  | 157,908,855 | C | G | 0.062  | -0.0143 | 0.0022 |
| rs6916716  | 6  | 30,385,235  | A | C | 0.1709 | -0.0093 | 0.0014 |
| rs62583551 | 9  | 138,660,237 | A | G | 0.2276 | 0.0083  | 0.0013 |
| rs7095620  | 10 | 114,448,218 | A | G | 0.3101 | -0.0075 | 0.0011 |
| rs57500891 | 5  | 91,996,073  | T | C | 0.8784 | 0.0106  | 0.0016 |
| rs75986654 | 9  | 109,037,355 | C | G | 0.0372 | -0.0182 | 0.0028 |
| rs11161035 | 14 | 29,273,706  | T | C | 0.5108 | 0.0076  | 0.0012 |
| rs4937856  | 11 | 133,788,407 | A | C | 0.4735 | -0.0069 | 0.0010 |
| rs9569738  | 13 | 58,330,643  | A | G | 0.2004 | 0.0087  | 0.0013 |
| rs12574281 | 11 | 131,205,421 | A | C | 0.6334 | -0.0072 | 0.0011 |
| rs3013170  | 6  | 64,840,987  | T | C | 0.6063 | 0.0071  | 0.0011 |
| rs12028229 | 1  | 72,986,136  | T | G | 0.269  | 0.0079  | 0.0012 |
| rs1027407  | 4  | 176,718,936 | A | G | 0.0549 | -0.0152 | 0.0023 |
| rs6697033  | 1  | 58,064,455  | A | G | 0.5459 | 0.0069  | 0.0011 |
| rs11256991 | 10 | 11,166,455  | T | G | 0.8235 | 0.0090  | 0.0014 |
| rs6946355  | 7  | 13,992,460  | A | G | 0.462  | 0.0069  | 0.0010 |
| rs1899888  | 10 | 63,604,654  | A | C | 0.4935 | 0.0069  | 0.0010 |
| rs11590325 | 1  | 154,756,425 | C | G | 0.6015 | -0.0070 | 0.0011 |
| rs72951837 | 6  | 115,141,283 | A | G | 0.0546 | -0.0152 | 0.0023 |
| rs10050950 | 5  | 111,260,051 | A | G | 0.3352 | -0.0073 | 0.0011 |
| rs11047225 | 12 | 24,195,587  | T | C | 0.4599 | -0.0069 | 0.0011 |
| rs831229   | 5  | 67,553,016  | A | G | 0.3729 | 0.0071  | 0.0011 |



|             |    |             |   |   |        |         |        |
|-------------|----|-------------|---|---|--------|---------|--------|
| rs9362387   | 6  | 87,793,401  | T | C | 0.2623 | -0.0078 | 0.0012 |
| rs9808993   | 3  | 21,856,683  | A | G | 0.2012 | 0.0086  | 0.0013 |
| rs2653344   | 6  | 55,133,586  | T | C | 0.2016 | -0.0086 | 0.0013 |
| rs774515    | 2  | 155,369,077 | T | C | 0.2283 | 0.0082  | 0.0013 |
| rs141457432 | 7  | 71,906,412  | A | G | 0.0191 | 0.0262  | 0.0040 |
| rs74970466  | 9  | 23,420,004  | T | C | 0.0816 | -0.0126 | 0.0019 |
| rs7172133   | 15 | 96,025,311  | A | C | 0.6869 | 0.0074  | 0.0011 |
| rs74455003  | 4  | 123,180,529 | A | G | 0.0298 | 0.0203  | 0.0031 |
| rs80165520  | 2  | 57,603,186  | T | C | 0.1038 | -0.0113 | 0.0017 |
| rs12201073  | 6  | 67,488,602  | T | C | 0.3821 | -0.0071 | 0.0011 |
| rs139856048 | 3  | 46,768,679  | T | G | 0.0422 | -0.0173 | 0.0026 |
| rs2742690   | 1  | 2,987,268   | A | C | 0.1999 | -0.0086 | 0.0013 |
| rs13122283  | 4  | 62,993,563  | A | G | 0.4279 | 0.0069  | 0.0011 |
| rs28711500  | 8  | 87,751,047  | A | C | 0.3025 | 0.0075  | 0.0011 |
| rs7566356   | 2  | 56,759,467  | C | G | 0.5098 | 0.0069  | 0.0010 |
| rs7002655   | 8  | 125,589,956 | A | G | 0.4425 | 0.0069  | 0.0011 |
| rs745280    | 16 | 87,397,288  | A | G | 0.5353 | 0.0069  | 0.0010 |
| rs891793    | 15 | 27,256,021  | C | G | 0.5437 | -0.0069 | 0.0011 |
| rs1869930   | 15 | 51,933,907  | C | G | 0.2427 | -0.0080 | 0.0012 |
| rs10488931  | 4  | 82,329,840  | T | C | 0.0445 | -0.0168 | 0.0026 |
| rs192230285 | 2  | 25,454,104  | T | C | 0.0171 | -0.0266 | 0.0041 |
| rs1462852   | 3  | 116,963,998 | A | T | 0.6671 | -0.0073 | 0.0011 |
| rs10993245  | 9  | 97,317,712  | A | T | 0.0851 | 0.0123  | 0.0019 |
| rs9538482   | 13 | 60,218,409  | A | G | 0.9226 | 0.0129  | 0.0020 |
| rs9932631   | 16 | 741,837     | A | G | 0.1681 | -0.0092 | 0.0014 |
| rs115865245 | 2  | 100,792,230 | T | G | 0.0173 | 0.0267  | 0.0041 |
| rs12052006  | 18 | 53,545,463  | T | C | 0.7951 | 0.0085  | 0.0013 |
| rs13112269  | 4  | 166,122,147 | A | G | 0.117  | 0.0107  | 0.0016 |
| rs57214198  | 18 | 22,082,857  | T | G | 0.0517 | -0.0155 | 0.0024 |
| rs6499084   | 16 | 66,466,538  | A | G | 0.3458 | 0.0072  | 0.0011 |
| rs2901066   | 2  | 60,797,896  | A | C | 0.8359 | 0.0093  | 0.0014 |
| rs75274506  | 10 | 126,600,778 | T | C | 0.9436 | -0.0150 | 0.0023 |
| rs9545395   | 13 | 36,370,970  | T | C | 0.8663 | 0.0101  | 0.0015 |
| rs1168114   | 1  | 63,156,043  | A | G | 0.3306 | -0.0073 | 0.0011 |
| rs139244145 | 7  | 111,912,738 | A | G | 0.0572 | -0.0148 | 0.0023 |
| rs623200    | 18 | 66,246,646  | T | C | 0.3849 | 0.0070  | 0.0011 |
| rs76936697  | 11 | 12,891,775  | C | G | 0.9702 | 0.0202  | 0.0031 |
| rs1610268   | 3  | 157,854,408 | A | G | 0.64   | -0.0071 | 0.0011 |
| rs300145    | 6  | 166,424,456 | T | C | 0.6656 | -0.0073 | 0.0011 |
| rs62270934  | 3  | 103,094,578 | A | G | 0.8004 | -0.0086 | 0.0013 |
| rs72893129  | 18 | 35,137,832  | A | C | 0.05   | -0.0157 | 0.0024 |
| rs147115690 | 3  | 180,940,058 | A | G | 0.9908 | 0.0364  | 0.0056 |
| rs4883624   | 12 | 133,212,737 | T | C | 0.4473 | -0.0069 | 0.0011 |
| rs10131962  | 14 | 89,328,429  | A | G | 0.5998 | 0.0070  | 0.0011 |
| rs2342525   | 2  | 151,992,930 | A | G | 0.5803 | -0.0069 | 0.0011 |
| rs12702698  | 7  | 8,152,340   | T | C | 0.4627 | 0.0069  | 0.0011 |
| rs2448929   | 15 | 87,028,140  | T | C | 0.5185 | 0.0069  | 0.0010 |
| rs11741850  | 5  | 176,148,465 | A | T | 0.4275 | 0.0069  | 0.0011 |

|            |    |             |   |   |        |         |        |
|------------|----|-------------|---|---|--------|---------|--------|
| rs54124399 | 11 | 68,183,145  | A | G | 0.5628 | 0.0080  | 0.0012 |
| rs2935969  | 15 | 76,437,970  | A | G | 0.7572 | 0.0080  | 0.0012 |
| rs10819272 | 9  | 129,954,334 | T | C | 0.5954 | 0.0070  | 0.0011 |
| rs818380   | 16 | 65,428,134  | A | G | 0.2261 | -0.0082 | 0.0013 |
| rs10118105 | 9  | 10,354,455  | A | G | 0.3802 | -0.0070 | 0.0011 |
| rs7704018  | 5  | 13,591,599  | C | G | 0.7162 | -0.0076 | 0.0012 |
| rs7520927  | 1  | 237,746,815 | A | G | 0.4848 | -0.0068 | 0.0010 |
| rs76596316 | 1  | 235,746,105 | A | T | 0.1133 | 0.0108  | 0.0017 |
| rs56363150 | 11 | 113,447,787 | A | G | 0.0205 | -0.0242 | 0.0037 |
| rs10983193 | 9  | 119,250,600 | A | C | 0.7781 | -0.0082 | 0.0013 |
| rs12678691 | 8  | 132,010,340 | A | G | 0.513  | 0.0068  | 0.0010 |
| rs10402747 | 19 | 45,815,248  | T | C | 0.5144 | 0.0069  | 0.0011 |
| rs28834466 | 15 | 73,816,464  | A | G | 0.9284 | 0.0133  | 0.0020 |
| rs53980530 | 13 | 91,972,194  | T | C | 0.9095 | -0.0138 | 0.0021 |
| rs9899056  | 17 | 48,186,942  | A | G | 0.3994 | 0.0070  | 0.0011 |
| rs12790034 | 11 | 65,785,739  | T | C | 0.169  | -0.0091 | 0.0014 |
| rs12821032 | 12 | 42,328,862  | A | G | 0.3879 | -0.0070 | 0.0011 |
| rs72990858 | 6  | 105,147,784 | A | G | 0.096  | 0.0116  | 0.0018 |
| rs72700025 | 9  | 24,049,517  | A | G | 0.1019 | -0.0113 | 0.0017 |
| rs10815861 | 9  | 8,417,956   | T | C | 0.8756 | 0.0103  | 0.0016 |
| rs17288217 | 2  | 175,872,885 | T | C | 0.319  | 0.0073  | 0.0011 |
| rs10002235 | 4  | 41,144,983  | T | G | 0.4229 | 0.0069  | 0.0011 |
| rs72989297 | 19 | 3,297,164   | T | G | 0.1344 | -0.0101 | 0.0015 |
| rs10139828 | 14 | 78,293,304  | T | C | 0.8617 | 0.0099  | 0.0015 |
| rs12351052 | 9  | 109,903,423 | T | C | 0.8528 | 0.0096  | 0.0015 |
| rs11606125 | 5  | 62,875,735  | A | T | 0.9532 | -0.0163 | 0.0025 |
| rs11853464 | 15 | 75,863,915  | A | G | 0.8776 | -0.0104 | 0.0016 |
| rs10966046 | 9  | 23,726,194  | C | G | 0.2639 | 0.0077  | 0.0012 |
| rs4961398  | 8  | 20,912,874  | A | T | 0.2981 | 0.0075  | 0.0011 |
| rs6852196  | 4  | 19,960,248  | T | C | 0.4603 | -0.0068 | 0.0010 |
| rs2438390  | 10 | 65,817,355  | A | G | 0.1607 | -0.0093 | 0.0014 |
| rs2068078  | 20 | 16,947,769  | T | G | 0.7882 | -0.0083 | 0.0013 |
| rs1485272  | 3  | 3,727,589   | T | C | 0.6535 | -0.0072 | 0.0011 |
| rs77423896 | 21 | 46,500,605  | A | G | 0.9465 | -0.0152 | 0.0023 |
| rs10511704 | 9  | 22,543,147  | A | T | 0.312  | -0.0074 | 0.0011 |
| rs28799383 | 7  | 97,392,616  | A | G | 0.748  | -0.0083 | 0.0013 |
| rs10821415 | 9  | 97,713,459  | A | C | 0.4271 | 0.0069  | 0.0011 |
| rs748404   | 15 | 43,559,231  | T | C | 0.7784 | -0.0082 | 0.0013 |
| rs61817931 | 1  | 204,444,687 | A | G | 0.9713 | -0.0205 | 0.0032 |
| rs1880088  | 11 | 20,959,185  | A | T | 0.264  | -0.0077 | 0.0012 |
| rs17088142 | 13 | 71,948,305  | T | G | 0.4691 | -0.0068 | 0.0010 |
| rs382196   | 3  | 9,145,554   | T | G | 0.3772 | -0.0070 | 0.0011 |
| rs73407126 | 6  | 28,605,039  | T | C | 0.9735 | 0.0214  | 0.0033 |
| rs4864881  | 4  | 55,200,455  | T | C | 0.6067 | -0.0070 | 0.0011 |
| rs1481294  | 11 | 38,604,075  | A | G | 0.4531 | -0.0068 | 0.0011 |
| rs7161997  | 15 | 40,562,105  | A | C | 0.2091 | -0.0084 | 0.0013 |
| rs367084   | 5  | 3,410,470   | T | C | 0.2796 | -0.0076 | 0.0012 |
| rs4934583  | 10 | 33,543,702  | A | G | 0.6421 | -0.0071 | 0.0011 |

|             |    |               |   |        |         |        |
|-------------|----|---------------|---|--------|---------|--------|
| rs181164682 | 11 | 62,462,217 A  | T | 0.02   | 0.0244  | 0.0037 |
| rs438788    | 8  | 137,673,429 A | T | 0.2067 | 0.0085  | 0.0013 |
| rs13164530  | 5  | 167,724,186 T | G | 0.1309 | -0.0101 | 0.0016 |
| rs4319543   | 12 | 122,645,048 A | C | 0.5212 | -0.0068 | 0.0010 |
| rs148752272 | 3  | 53,147,451 A  | G | 0.0102 | 0.0340  | 0.0052 |
| rs11645537  | 16 | 7,949,693 A   | G | 0.1458 | 0.0096  | 0.0015 |
| rs17649841  | 7  | 13,688,583 A  | C | 0.2356 | -0.0080 | 0.0012 |
| rs10858051  | 1  | 115,283,111 A | G | 0.7446 | 0.0078  | 0.0012 |
| rs115019702 | 12 | 53,407,012 A  | G | 0.9674 | 0.0227  | 0.0035 |
| rs1969444   | 18 | 27,650,251 A  | T | 0.5303 | -0.0068 | 0.0010 |
| rs2192692   | 2  | 59,104,524 A  | G | 0.56   | -0.0069 | 0.0011 |
| rs2176263   | 2  | 24,092,773 C  | G | 0.6043 | 0.0070  | 0.0011 |
| rs78866914  | 22 | 34,318,582 A  | T | 0.0315 | 0.0195  | 0.0030 |
| rs112419726 | 8  | 74,057,543 T  | C | 0.8507 | -0.0095 | 0.0015 |
| rs75903460  | 2  | 162,758,257 T | C | 0.9802 | 0.0248  | 0.0038 |
| rs78352674  | 5  | 136,832,821 T | G | 0.0298 | -0.0200 | 0.0031 |
| rs149916490 | 9  | 109,629,431 T | C | 0.977  | 0.0227  | 0.0035 |
| rs870681    | 17 | 77,773,876 A  | C | 0.745  | -0.0078 | 0.0012 |
| rs4886623   | 15 | 74,092,928 T  | C | 0.7115 | 0.0075  | 0.0012 |
| rs1765749   | 13 | 101,378,195 A | G | 0.2463 | -0.0079 | 0.0012 |
| rs6950250   | 7  | 95,853,837 A  | G | 0.1748 | -0.0089 | 0.0014 |
| rs1506536   | 2  | 28,182,006 T  | C | 0.4947 | 0.0068  | 0.0010 |
| rs11953059  | 5  | 136,416,216 T | C | 0.426  | -0.0069 | 0.0011 |
| rs4890901   | 18 | 74,846,355 A  | G | 0.6572 | 0.0072  | 0.0011 |
| rs2336723   | 3  | 53,106,047 T  | C | 0.4327 | 0.0068  | 0.0011 |
| rs35983513  | 3  | 70,568,927 C  | G | 0.2058 | -0.0097 | 0.0015 |
| rs4668897   | 2  | 15,480,441 C  | G | 0.2477 | 0.0079  | 0.0012 |
| rs12487097  | 3  | 137,404,470 A | G | 0.6941 | 0.0074  | 0.0011 |
| rs730275    | 20 | 58,254,093 A  | G | 0.865  | 0.0099  | 0.0015 |
| rs7537039   | 1  | 58,717,410 A  | G | 0.5705 | -0.0068 | 0.0011 |
| rs11766968  | 7  | 96,622,615 T  | C | 0.1433 | -0.0097 | 0.0015 |
| rs28459462  | 4  | 130,251,795 A | G | 0.6401 | 0.0071  | 0.0011 |
| rs2935788   | 8  | 109,748,009 T | C | 0.6268 | 0.0070  | 0.0011 |
| rs2301586   | 22 | 29,702,910 A  | T | 0.6474 | -0.0071 | 0.0011 |
| rs11156027  | 6  | 155,810,346 A | G | 0.7554 | -0.0079 | 0.0012 |
| rs148544378 | 18 | 40,323,567 T  | C | 0.0176 | 0.0260  | 0.0040 |
| rs6758898   | 2  | 113,382,684 A | G | 0.6069 | 0.0069  | 0.0011 |
| rs35377646  | 10 | 66,652,165 A  | G | 0.8382 | -0.0100 | 0.0016 |
| rs116973    | 7  | 20,903,542 T  | C | 0.5356 | -0.0068 | 0.0010 |
| rs6824923   | 4  | 113,141,435 T | C | 0.8341 | 0.0091  | 0.0014 |
| rs11777093  | 8  | 21,424,405 T  | C | 0.483  | 0.0068  | 0.0010 |
| rs150121450 | 13 | 105,773,449 T | G | 0.0307 | 0.0197  | 0.0030 |
| rs12506701  | 4  | 160,502,686 A | T | 0.4084 | 0.0069  | 0.0011 |
| rs2354979   | 2  | 51,921,531 A  | G | 0.5873 | 0.0069  | 0.0011 |
| rs645327    | 11 | 88,588,786 T  | C | 0.6717 | -0.0072 | 0.0011 |
| rs117494882 | 9  | 23,395,514 T  | C | 0.058  | -0.0146 | 0.0023 |
| rs7204214   | 16 | 84,162,986 A  | G | 0.788  | 0.0083  | 0.0013 |
| rs58338291  | 16 | 3,757,786 T   | C | 0.3168 | 0.0073  | 0.0011 |

|             |    |             |   |   |        |         |        |
|-------------|----|-------------|---|---|--------|---------|--------|
| rs11245450  | 10 | 126,658,075 | A | G | 0.4236 | 0.0069  | 0.0011 |
| rs11181124  | 12 | 42,115,447  | T | C | 0.7868 | -0.0083 | 0.0013 |
| rs10139457  | 14 | 98,804,111  | A | G | 0.4373 | -0.0068 | 0.0011 |
| rs11748120  | 5  | 60,879,731  | C | G | 0.1502 | -0.0095 | 0.0015 |
| rs7602601   | 2  | 183,722,966 | T | C | 0.8808 | -0.0104 | 0.0016 |
| rs7212846   | 17 | 57,420,420  | T | C | 0.2471 | 0.0078  | 0.0012 |
| rs365114    | 6  | 115,327,645 | T | C | 0.8125 | 0.0087  | 0.0013 |
| rs983473    | 4  | 157,695,392 | T | C | 0.2307 | 0.0080  | 0.0012 |
| rs7110069   | 11 | 91,945,888  | T | C | 0.8129 | 0.0087  | 0.0013 |
| rs7196426   | 16 | 54,248,648  | A | C | 0.8361 | 0.0091  | 0.0014 |
| rs75877036  | 21 | 35,847,890  | A | T | 0.9422 | -0.0145 | 0.0022 |
| rs8079766   | 17 | 3,938,215   | T | C | 0.3945 | 0.0069  | 0.0011 |
| rs11667653  | 19 | 57,101,876  | T | C | 0.1897 | -0.0086 | 0.0013 |
| rs1114504   | 11 | 79,237,887  | T | C | 0.825  | -0.0089 | 0.0014 |
| rs79844375  | 8  | 60,280,222  | T | C | 0.0994 | -0.0113 | 0.0018 |
| rs9802100   | 8  | 142,856,303 | A | G | 0.5124 | 0.0068  | 0.0011 |
| rs56348843  | 8  | 15,212,063  | A | G | 0.4492 | -0.0068 | 0.0011 |
| rs719645    | 2  | 50,883,300  | T | C | 0.7648 | -0.0080 | 0.0012 |
| rs80352808  | 1  | 22,955,229  | A | G | 0.2808 | -0.0075 | 0.0012 |
| rs73101171  | 3  | 68,432,051  | T | C | 0.1369 | 0.0098  | 0.0015 |
| rs72770059  | 2  | 7,389,596   | A | G | 0.2128 | -0.0082 | 0.0013 |
| rs160706    | 5  | 123,586,728 | A | G | 0.6268 | 0.0070  | 0.0011 |
| rs10984573  | 9  | 122,275,247 | A | T | 0.7147 | -0.0075 | 0.0012 |
| rs341048    | 11 | 72,298,280  | T | C | 0.1384 | -0.0098 | 0.0015 |
| rs79180767  | 6  | 67,540,984  | T | C | 0.3786 | -0.0080 | 0.0012 |
| rs4685448   | 3  | 252,344     | A | G | 0.4403 | -0.0068 | 0.0011 |
| rs188029    | 12 | 59,895,548  | A | G | 0.27   | -0.0076 | 0.0012 |
| rs117556294 | 10 | 34,581,123  | A | T | 0.9419 | 0.0146  | 0.0023 |
| rs7986701   | 13 | 92,905,521  | C | G | 0.7414 | -0.0077 | 0.0012 |
| rs56158436  | 10 | 72,886,269  | A | G | 0.3102 | -0.0073 | 0.0011 |
| rs181483    | 14 | 69,358,094  | A | G | 0.6271 | 0.0070  | 0.0011 |
| rs10813533  | 9  | 31,319,287  | T | C | 0.874  | 0.0102  | 0.0016 |
| rs1278537   | 1  | 50,882,159  | T | G | 0.4803 | -0.0067 | 0.0010 |
| rs7589741   | 2  | 109,950,545 | A | T | 0.3882 | -0.0069 | 0.0011 |
| rs4552666   | 5  | 161,180,720 | A | G | 0.7679 | -0.0080 | 0.0012 |
| rs7036535   | 9  | 122,342,630 | A | G | 0.4982 | 0.0067  | 0.0010 |
| rs12960373  | 18 | 77,902,707  | A | G | 0.8451 | -0.0093 | 0.0014 |
| rs17222172  | 2  | 161,788,289 | A | C | 0.3349 | 0.0071  | 0.0011 |
| rs58385891  | 11 | 46,348,663  | A | G | 0.1806 | -0.0088 | 0.0014 |
| rs9992967   | 4  | 96,979,429  | T | G | 0.786  | 0.0082  | 0.0013 |
| rs59093198  | 8  | 97,740,267  | T | C | 0.6618 | -0.0071 | 0.0011 |
| rs10781342  | 9  | 78,778,550  | T | C | 0.2083 | 0.0083  | 0.0013 |
| rs73224350  | 21 | 22,288,653  | A | G | 0.8618 | 0.0098  | 0.0015 |
| rs6710557   | 2  | 4,827,559   | A | G | 0.4704 | -0.0067 | 0.0010 |
| rs4731366   | 7  | 127,170,015 | T | C | 0.7484 | -0.0077 | 0.0012 |
| rs66521413  | 5  | 43,015,122  | A | T | 0.2074 | -0.0083 | 0.0013 |
| rs7626224   | 3  | 104,907,697 | T | G | 0.7573 | 0.0078  | 0.0012 |
| rs189887274 | 7  | 86,195,992  | T | C | 0.9667 | 0.0189  | 0.0029 |

|             |    |             |   |   |        |         |        |
|-------------|----|-------------|---|---|--------|---------|--------|
| rs4793090   | 17 | 40,686,342  | A | G | 0.6671 | 0.0071  | 0.0011 |
| rs113368975 | 2  | 199,583,079 | A | G | 0.0508 | -0.0159 | 0.0025 |
| rs6689263   | 1  | 20,882,523  | A | G | 0.8872 | -0.0106 | 0.0017 |
| rs1663564   | 12 | 105,546,172 | A | G | 0.9116 | 0.0170  | 0.0026 |
| rs72899101  | 2  | 156,629,975 | T | G | 0.8486 | -0.0094 | 0.0015 |
| rs78462816  | 4  | 38,300,662  | A | G | 0.8806 | -0.0104 | 0.0016 |
| rs75834196  | 2  | 55,286,561  | T | C | 0.0963 | -0.0114 | 0.0018 |
| rs6839051   | 4  | 35,026,277  | A | C | 0.3828 | -0.0069 | 0.0011 |
| rs60068013  | 2  | 48,435,582  | A | T | 0.4488 | 0.0067  | 0.0011 |
| rs542189    | 12 | 121,032,542 | T | G | 0.2302 | 0.0080  | 0.0012 |
| rs6542543   | 2  | 120,466,940 | A | G | 0.8283 | -0.0089 | 0.0014 |
| rs17378539  | 1  | 98,209,110  | T | C | 0.8283 | 0.0089  | 0.0014 |
| rs72933754  | 2  | 212,781,536 | T | C | 0.9136 | 0.0122  | 0.0019 |
| rs1331999   | 9  | 1,499,641   | T | G | 0.3996 | -0.0068 | 0.0011 |
| rs113938506 | 11 | 122,042,199 | A | G | 0.0565 | -0.0146 | 0.0023 |
| rs298288    | 2  | 157,282,310 | C | G | 0.2022 | 0.0084  | 0.0013 |
| rs7945465   | 11 | 98,774,102  | A | C | 0.2855 | -0.0074 | 0.0012 |
| rs213014    | 1  | 21,643,745  | T | C | 0.5459 | -0.0067 | 0.0011 |
| rs2396625   | 7  | 113,028,634 | A | T | 0.4275 | 0.0068  | 0.0011 |
| rs62079997  | 17 | 80,076,888  | T | C | 0.5644 | -0.0068 | 0.0011 |
| rs1397870   | 11 | 29,403,471  | T | G | 0.1959 | -0.0084 | 0.0013 |
| rs72792003  | 16 | 66,742,259  | T | G | 0.9576 | -0.0167 | 0.0026 |
| rs8060784   | 16 | 76,261,952  | T | C | 0.2713 | 0.0075  | 0.0012 |
| rs75925700  | 4  | 123,401,769 | A | G | 0.6667 | -0.0082 | 0.0013 |
| rs7500906   | 16 | 49,796,831  | A | G | 0.4639 | -0.0067 | 0.0010 |
| rs12435895  | 14 | 66,459,694  | A | G | 0.7716 | -0.0080 | 0.0012 |
| rs2692473   | 7  | 13,568,346  | A | C | 0.5057 | -0.0067 | 0.0010 |
| rs147447653 | 14 | 30,727,611  | T | G | 0.0215 | 0.0232  | 0.0036 |
| rs12379841  | 9  | 14,536,315  | A | G | 0.317  | -0.0072 | 0.0011 |
| rs11681040  | 2  | 204,551,970 | T | C | 0.0958 | -0.0114 | 0.0018 |
| rs1800936   | 2  | 48,025,694  | T | C | 0.1294 | -0.0100 | 0.0016 |
| rs35359254  | 19 | 18,901,618  | C | G | 0.9038 | 0.0114  | 0.0018 |
| rs13102450  | 4  | 182,292,161 | T | C | 0.6609 | -0.0071 | 0.0011 |
| rs73197422  | 12 | 88,045,706  | A | G | 0.9276 | -0.0129 | 0.0020 |
| rs35087630  | 2  | 154,793,237 | A | T | 0.2673 | 0.0076  | 0.0012 |
| rs117624174 | 7  | 2,081,425   | T | C | 0.0585 | 0.0143  | 0.0022 |
| rs9984313   | 21 | 39,193,774  | T | C | 0.7582 | -0.0078 | 0.0012 |
| rs473900    | 6  | 93,931,037  | T | C | 0.2447 | -0.0078 | 0.0012 |
| rs2434672   | 5  | 11,471,879  | A | C | 0.53   | 0.0067  | 0.0010 |
| rs502506    | 6  | 72,724,390  | A | G | 0.4944 | -0.0067 | 0.0010 |
| rs12658400  | 5  | 179,717,643 | A | T | 0.475  | 0.0067  | 0.0010 |
| rs6477309   | 9  | 8,450,638   | T | C | 0.6655 | -0.0071 | 0.0011 |
| rs9459465   | 6  | 166,048,868 | A | G | 0.2324 | -0.0079 | 0.0012 |
| rs11690494  | 2  | 100,983,179 | T | C | 0.1303 | 0.0100  | 0.0016 |
| rs991001    | 8  | 94,484,749  | C | G | 0.1345 | 0.0098  | 0.0015 |
| rs7687750   | 4  | 41,041,636  | A | G | 0.2379 | -0.0079 | 0.0012 |
| rs58837030  | 16 | 15,603,155  | C | G | 0.2051 | -0.0083 | 0.0013 |
| rs4680176   | 3  | 155,141,789 | T | C | 0.3796 | 0.0069  | 0.0011 |

|             |    |             |   |   |        |         |        |
|-------------|----|-------------|---|---|--------|---------|--------|
| rs7721182   | 5  | 122,405,791 | T | C | 0.4433 | 0.0067  | 0.0011 |
| rs66667727  | 3  | 178,797,216 | C | G | 0.3593 | 0.0070  | 0.0011 |
| rs4793109   | 17 | 42,554,214  | A | C | 0.5621 | 0.0067  | 0.0011 |
| rs12224337  | 11 | 107,140,077 | A | G | 0.5028 | -0.0067 | 0.0010 |
| rs10757366  | 9  | 22,887,174  | T | C | 0.4901 | 0.0067  | 0.0010 |
| rs6772801   | 3  | 139,496,471 | A | G | 0.7127 | -0.0074 | 0.0012 |
| rs2041543   | 9  | 129,197,579 | T | C | 0.1587 | 0.0091  | 0.0014 |
| rs9653289   | 2  | 172,098,622 | A | C | 0.2042 | 0.0083  | 0.0013 |
| rs34533962  | 3  | 80,875,909  | A | G | 0.6802 | -0.0072 | 0.0011 |
| rs2937834   | 5  | 61,025,943  | A | T | 0.4483 | -0.0067 | 0.0011 |
| rs1109156   | 3  | 159,572,120 | T | C | 0.208  | 0.0082  | 0.0013 |
| rs9804142   | 1  | 225,673,847 | T | C | 0.6984 | 0.0073  | 0.0011 |
| rs34012599  | 10 | 14,668,398  | A | G | 0.542  | -0.0067 | 0.0011 |
| rs1008516   | 7  | 71,314,864  | T | C | 0.2219 | 0.0080  | 0.0013 |
| rs111227517 | 19 | 38,705,694  | T | C | 0.8091 | -0.0085 | 0.0013 |
| rs7116370   | 11 | 99,281,340  | T | G | 0.6712 | -0.0071 | 0.0011 |
| rs1329605   | 9  | 10,805,894  | T | C | 0.2804 | 0.0075  | 0.0012 |
| rs1019385   | 12 | 14,134,843  | A | C | 0.4582 | -0.0067 | 0.0011 |
| rs4709383   | 6  | 160,298,088 | A | G | 0.9234 | 0.0125  | 0.0020 |
| rs228080    | 21 | 43,966,793  | A | G | 0.5108 | 0.0067  | 0.0010 |
| rs9319011   | 13 | 84,624,659  | A | G | 0.8317 | 0.0090  | 0.0014 |
| rs117416770 | 8  | 22,834,384  | T | C | 0.0347 | -0.0183 | 0.0029 |
| rs79009682  | 5  | 60,494,556  | A | G | 0.0371 | 0.0432  | 0.0068 |
| rs28594971  | 8  | 70,468,380  | A | G | 0.179  | 0.0087  | 0.0014 |
| rs62181533  | 2  | 192,905,876 | A | C | 0.5083 | 0.0067  | 0.0010 |
| rs10816784  | 9  | 111,958,953 | A | G | 0.3879 | 0.0068  | 0.0011 |
| rs10786066  | 10 | 94,782,567  | T | C | 0.7166 | 0.0074  | 0.0012 |
| rs12534982  | 7  | 132,574,100 | A | G | 0.7374 | 0.0076  | 0.0012 |
| rs9607087   | 22 | 34,269,443  | T | C | 0.6158 | 0.0069  | 0.0011 |
| rs79391487  | 19 | 19,989,679  | T | C | 0.056  | -0.0146 | 0.0023 |
| rs36123499  | 8  | 118,809,612 | T | C | 0.7143 | -0.0074 | 0.0012 |
| rs1362439   | 16 | 53,375,843  | A | T | 0.6045 | 0.0068  | 0.0011 |
| rs62227705  | 21 | 34,919,593  | A | C | 0.7158 | 0.0074  | 0.0012 |
| rs2285938   | 9  | 135,739,214 | T | C | 0.1941 | 0.0084  | 0.0013 |
| rs862957    | 14 | 26,485,411  | A | T | 0.2456 | 0.0077  | 0.0012 |
| rs77180386  | 4  | 159,886,831 | A | G | 0.7156 | 0.0085  | 0.0013 |
| rs1787073   | 18 | 35,362,191  | A | G | 0.1966 | -0.0084 | 0.0013 |
| rs8105087   | 19 | 13,250,340  | A | T | 0.7211 | -0.0075 | 0.0012 |
| rs1817747   | 2  | 10,913,149  | T | C | 0.3705 | 0.0069  | 0.0011 |
| rs11154134  | 6  | 123,320,778 | A | G | 0.6906 | -0.0072 | 0.0011 |
| rs4254203   | 13 | 84,656,110  | A | T | 0.0516 | -0.0151 | 0.0024 |
| rs8051854   | 16 | 71,438,287  | A | C | 0.6357 | 0.0069  | 0.0011 |
| rs17561583  | 8  | 40,673,248  | T | C | 0.1368 | -0.0097 | 0.0015 |
| rs4969315   | 17 | 78,925,383  | A | G | 0.5907 | -0.0068 | 0.0011 |
| rs10885931  | 10 | 84,945,512  | A | G | 0.6583 | 0.0070  | 0.0011 |
| rs11941559  | 4  | 15,565,874  | C | G | 0.113  | -0.0105 | 0.0017 |
| rs12634802  | 3  | 65,387,514  | T | C | 0.7336 | -0.0075 | 0.0012 |
| rs9558526   | 13 | 105,956,232 | A | C | 0.301  | -0.0073 | 0.0011 |

|             |    |               |   |        |         |        |
|-------------|----|---------------|---|--------|---------|--------|
| rs10821945  | 10 | 63,801,722 T  | G | 0.5785 | 0.0068  | 0.0011 |
| rs1764020   | 6  | 163,804,967 T | C | 0.6723 | 0.0071  | 0.0011 |
| rs10153150  | 16 | 65,803,954 T  | G | 0.1136 | 0.0105  | 0.0016 |
| rs11851667  | 14 | 33,588,830 T  | C | 0.7375 | -0.0076 | 0.0012 |
| rs75107766  | 4  | 164,797,725 A | C | 0.9452 | -0.0147 | 0.0023 |
| rs13244634  | 7  | 5,273,464 T   | C | 0.2363 | -0.0078 | 0.0012 |
| rs72784561  | 16 | 65,795,865 A  | G | 0.6682 | 0.0071  | 0.0011 |
| rs538249    | 7  | 105,360,021 A | C | 0.5738 | -0.0067 | 0.0011 |
| rs71504489  | 8  | 28,664,306 T  | C | 0.1207 | 0.0102  | 0.0016 |
| rs78621285  | 16 | 22,903,022 A  | T | 0.9118 | 0.0118  | 0.0019 |
| rs2240471   | 7  | 21,757,690 A  | G | 0.4388 | 0.0067  | 0.0011 |
| rs149550386 | 4  | 106,420,120 T | C | 0.0546 | 0.0147  | 0.0023 |
| rs153098    | 16 | 13,273,876 A  | C | 0.531  | -0.0067 | 0.0010 |
| rs6061441   | 20 | 60,022,069 T  | C | 0.2015 | -0.0083 | 0.0013 |
| rs61940318  | 12 | 100,263,190 A | G | 0.1974 | -0.0083 | 0.0013 |
| rs12373065  | 16 | 71,870,032 A  | T | 0.1296 | 0.0099  | 0.0016 |
| rs3888345   | 18 | 35,104,620 T  | G | 0.5801 | -0.0068 | 0.0011 |
| rs8028148   | 15 | 96,679,303 A  | G | 0.7024 | 0.0073  | 0.0011 |
| rs7612549   | 3  | 34,814,101 A  | C | 0.7768 | 0.0080  | 0.0013 |
| rs74128334  | 1  | 174,242,471 T | G | 0.0361 | 0.0179  | 0.0028 |
| rs7171941   | 15 | 81,011,226 A  | G | 0.5025 | -0.0066 | 0.0010 |
| rs4739090   | 8  | 64,321,053 T  | C | 0.3509 | 0.0070  | 0.0011 |
| rs28448822  | 4  | 21,787,065 A  | C | 0.8692 | 0.0098  | 0.0016 |
| rs60225156  | 18 | 44,329,878 A  | C | 0.7911 | 0.0082  | 0.0013 |
| rs4619072   | 10 | 134,205,336 T | C | 0.2933 | -0.0073 | 0.0011 |
| rs12496649  | 3  | 66,906,125 T  | C | 0.5676 | -0.0067 | 0.0011 |
| rs34762508  | 10 | 102,024,258 T | C | 0.4245 | 0.0067  | 0.0011 |
| rs10818407  | 9  | 122,696,635 T | C | 0.2278 | 0.0079  | 0.0012 |
| rs77462006  | 6  | 97,443,859 A  | G | 0.0362 | -0.0178 | 0.0028 |
| rs1174387   | 12 | 58,682,665 T  | C | 0.4616 | -0.0067 | 0.0010 |
| rs2345617   | 10 | 82,797,583 C  | G | 0.2747 | -0.0074 | 0.0012 |
| rs35951883  | 14 | 101,355,400 A | G | 0.7794 | -0.0081 | 0.0013 |
| rs1044230   | 8  | 110,552,577 T | C | 0.2188 | 0.0080  | 0.0013 |
| rs13382311  | 2  | 123,941,611 T | G | 0.6065 | 0.0068  | 0.0011 |
| rs8063312   | 16 | 68,763,142 A  | C | 0.1136 | -0.0105 | 0.0017 |
| rs57440904  | 4  | 66,334,001 A  | C | 0.2848 | -0.0073 | 0.0012 |
| rs6786125   | 3  | 28,727,523 C  | G | 0.8208 | 0.0086  | 0.0014 |
| rs6779981   | 3  | 171,054,056 T | C | 0.5966 | 0.0068  | 0.0011 |
| rs7101996   | 11 | 11,259,298 T  | C | 0.5652 | -0.0067 | 0.0011 |
| rs61879862  | 11 | 31,267,596 T  | C | 0.8752 | -0.0101 | 0.0016 |
| rs1428102   | 16 | 18,026,440 A  | G | 0.3866 | -0.0068 | 0.0011 |
| rs12602408  | 17 | 56,421,270 A  | G | 0.2877 | 0.0073  | 0.0012 |
| rs62453453  | 7  | 39,301,495 T  | C | 0.1192 | -0.0102 | 0.0016 |
| rs539906783 | 6  | 28,739,867 C  | G | 0.9711 | 0.0200  | 0.0032 |
| rs840850    | 5  | 87,079,029 A  | G | 0.4659 | -0.0066 | 0.0010 |
| rs5771204   | 22 | 50,614,476 T  | C | 0.5802 | 0.0067  | 0.0011 |
| rs62114178  | 19 | 58,778,451 A  | G | 0.3724 | 0.0069  | 0.0011 |
| rs7729431   | 5  | 85,498,043 A  | G | 0.4826 | 0.0066  | 0.0010 |

|             |    |             |   |   |        |         |        |
|-------------|----|-------------|---|---|--------|---------|--------|
| rs10739569  | 9  | 123,361,027 | C | G | 0.7001 | -0.0072 | 0.0011 |
| rs478007    | 18 | 26,492,205  | T | G | 0.2434 | 0.0077  | 0.0012 |
| rs4749578   | 10 | 30,964,289  | T | C | 0.3364 | 0.0070  | 0.0011 |
| rs1155675   | 12 | 97,635,817  | T | G | 0.7617 | 0.0078  | 0.0012 |
| rs4456284   | 11 | 112,861,779 | T | C | 0.1253 | -0.0100 | 0.0016 |
| rs12272462  | 11 | 128,526,406 | A | G | 0.7325 | 0.0075  | 0.0012 |
| rs12591073  | 15 | 47,947,650  | T | C | 0.5998 | 0.0068  | 0.0011 |
| rs1353286   | 3  | 27,772,014  | T | G | 0.537  | 0.0066  | 0.0011 |
| rs2104598   | 10 | 114,715,598 | A | G | 0.53   | -0.0067 | 0.0011 |
| rs35727422  | 5  | 140,448,260 | A | C | 0.0776 | -0.0124 | 0.0020 |
| rs186456786 | 13 | 58,698,035  | A | G | 0.99   | 0.0342  | 0.0054 |
| rs9326769   | 5  | 108,653,720 | T | C | 0.4157 | 0.0067  | 0.0011 |
| rs4945160   | 11 | 76,916,967  | A | G | 0.449  | 0.0067  | 0.0011 |
| rs17205908  | 6  | 127,764,305 | T | C | 0.3265 | -0.0077 | 0.0012 |
| rs73087577  | 7  | 20,834,410  | T | C | 0.0597 | -0.0140 | 0.0022 |
| rs1998846   | 1  | 69,901,557  | A | G | 0.3125 | 0.0072  | 0.0011 |
| rs4784148   | 16 | 61,704,650  | T | C | 0.6862 | -0.0071 | 0.0011 |
| rs3796432   | 4  | 96,030,402  | T | G | 0.3714 | 0.0068  | 0.0011 |
| rs9367942   | 6  | 17,127,706  | A | G | 0.1401 | 0.0095  | 0.0015 |
| rs56317140  | 2  | 167,437,581 | A | C | 0.8733 | -0.0101 | 0.0016 |
| rs10033587  | 4  | 66,239,196  | T | C | 0.0232 | 0.0220  | 0.0035 |
| rs13138842  | 4  | 158,143,092 | A | G | 0.197  | 0.0083  | 0.0013 |
| rs11171681  | 12 | 56,193,233  | A | C | 0.9578 | 0.0164  | 0.0026 |
| rs10942058  | 5  | 24,580,406  | T | C | 0.5029 | 0.0066  | 0.0010 |
| rs10499014  | 6  | 97,947,755  | C | G | 0.7315 | -0.0075 | 0.0012 |
| rs143544215 | 12 | 56,452,055  | A | G | 0.0099 | -0.0342 | 0.0054 |
| rs113324476 | 3  | 85,007,807  | T | C | 0.0168 | 0.0265  | 0.0042 |
| rs59259701  | 17 | 80,543,010  | T | C | 0.3153 | -0.0085 | 0.0013 |
| rs4865501   | 4  | 1,571,070   | T | C | 0.4719 | -0.0067 | 0.0011 |
| rs35792166  | 3  | 178,271,216 | T | C | 0.3678 | 0.0068  | 0.0011 |
| rs35700858  | 16 | 350,857     | A | C | 0.163  | 0.0090  | 0.0014 |
| rs6500234   | 16 | 49,613,746  | T | C | 0.6437 | 0.0069  | 0.0011 |
| rs1344594   | 2  | 53,416,895  | C | G | 0.0766 | 0.0124  | 0.0020 |
| rs2035936   | 3  | 141,298,124 | T | G | 0.0544 | -0.0146 | 0.0023 |
| rs7569706   | 2  | 156,828,501 | A | G | 0.7975 | 0.0082  | 0.0013 |
| rs3768992   | 2  | 101,599,864 | A | G | 0.5085 | 0.0066  | 0.0010 |
| rs61822065  | 1  | 196,065,507 | A | G | 0.5453 | -0.0066 | 0.0011 |
| rs7565063   | 2  | 160,238,109 | A | T | 0.2434 | 0.0077  | 0.0012 |
| rs11264531  | 1  | 156,688,152 | T | C | 0.361  | 0.0069  | 0.0011 |
| rs11915916  | 3  | 45,310,542  | T | C | 0.1368 | 0.0096  | 0.0015 |
| rs10055846  | 5  | 32,323,504  | A | G | 0.8437 | 0.0091  | 0.0014 |
| rs76799289  | 1  | 172,218,257 | T | G | 0.014  | -0.0283 | 0.0045 |
| rs9914251   | 17 | 5,394,882   | A | G | 0.7579 | 0.0077  | 0.0012 |
| rs11562848  | 4  | 118,429,474 | T | C | 0.0947 | 0.0113  | 0.0018 |
| rs10921229  | 1  | 192,625,032 | C | G | 0.4416 | 0.0066  | 0.0011 |
| rs7986263   | 13 | 53,672,947  | T | G | 0.5989 | 0.0067  | 0.0011 |
| rs73711273  | 8  | 135,626,918 | A | G | 0.921  | 0.0122  | 0.0019 |
| rs1290126   | 10 | 18,639,462  | T | C | 0.4508 | -0.0066 | 0.0011 |



|             |    |             |   |   |        |         |        |
|-------------|----|-------------|---|---|--------|---------|--------|
| rs2160317   | 2  | 202,839,319 | T | C | 0.4324 | 0.0066  | 0.0011 |
| rs10759882  | 9  | 119,733,639 | T | C | 0.7186 | -0.0073 | 0.0012 |
| rs33002     | 5  | 80,165,378  | A | T | 0.4451 | -0.0066 | 0.0011 |
| rs17106672  | 14 | 69,455,505  | A | C | 0.8245 | 0.0087  | 0.0014 |
| rs67981189  | 14 | 71,472,226  | A | G | 0.6599 | -0.0070 | 0.0011 |
| rs6544449   | 2  | 41,802,979  | A | G | 0.3592 | -0.0069 | 0.0011 |
| rs7068032   | 10 | 65,474,912  | A | G | 0.4382 | -0.0066 | 0.0011 |
| rs2352430   | 10 | 87,800,136  | T | C | 0.7703 | -0.0078 | 0.0012 |
| rs3844013   | 14 | 36,745,669  | T | C | 0.9457 | 0.0145  | 0.0023 |
| rs307913    | 19 | 54,443,051  | A | G | 0.8508 | 0.0093  | 0.0015 |
| rs74828610  | 17 | 42,793,037  | T | G | 0.9263 | -0.0126 | 0.0020 |
| rs10206657  | 2  | 233,462,095 | A | G | 0.2528 | 0.0076  | 0.0012 |
| rs72835052  | 5  | 167,627,642 | A | G | 0.0664 | 0.0133  | 0.0021 |
| rs2381575   | 2  | 145,078,959 | T | C | 0.533  | -0.0066 | 0.0011 |
| rs62541086  | 9  | 27,943,037  | T | G | 0.6488 | 0.0069  | 0.0011 |
| rs341031    | 11 | 72,249,238  | T | C | 0.7116 | 0.0073  | 0.0012 |
| rs60743220  | 3  | 68,945,153  | T | C | 0.8371 | 0.0089  | 0.0014 |
| rs10205363  | 2  | 144,179,493 | A | G | 0.0223 | 0.0224  | 0.0036 |
| rs76449306  | 18 | 39,935,951  | T | G | 0.8916 | -0.0106 | 0.0017 |
| rs2055940   | 4  | 46,997,913  | A | G | 0.3231 | 0.0070  | 0.0011 |
| rs10943588  | 6  | 79,510,994  | A | C | 0.6174 | 0.0068  | 0.0011 |
| rs2407902   | 16 | 61,529,433  | T | C | 0.7311 | 0.0074  | 0.0012 |
| rs351880    | 20 | 62,856,121  | T | C | 0.1964 | -0.0083 | 0.0013 |
| rs2301465   | 6  | 112,030,644 | T | C | 0.0466 | -0.0156 | 0.0025 |
| rs12305290  | 12 | 18,399,464  | A | G | 0.1728 | -0.0087 | 0.0014 |
| rs9601364   | 13 | 80,952,100  | T | C | 0.7862 | 0.0080  | 0.0013 |
| rs12445627  | 16 | 7,614,876   | A | G | 0.4672 | -0.0066 | 0.0010 |
| rs10854143  | 19 | 15,512,720  | T | C | 0.4853 | 0.0066  | 0.0010 |
| rs28608599  | 4  | 16,277,862  | T | C | 0.7193 | -0.0073 | 0.0012 |
| rs11706224  | 3  | 135,193,301 | T | C | 0.6442 | 0.0069  | 0.0011 |
| rs1289861   | 1  | 117,853,913 | A | G | 0.2271 | -0.0078 | 0.0012 |
| rs2018586   | 7  | 7,361,896   | A | G | 0.1909 | 0.0084  | 0.0013 |
| rs35111947  | 2  | 221,251,966 | A | G | 0.6604 | 0.0069  | 0.0011 |
| rs114704918 | 1  | 174,615,600 | A | G | 0.9114 | 0.0117  | 0.0019 |
| rs28473320  | 15 | 97,462,529  | T | C | 0.6969 | -0.0071 | 0.0011 |
| rs707084    | 2  | 155,308,061 | A | G | 0.459  | 0.0066  | 0.0011 |
| rs7681103   | 4  | 12,312,917  | A | G | 0.6169 | -0.0068 | 0.0011 |
| rs422247    | 6  | 14,913,987  | T | C | 0.743  | 0.0075  | 0.0012 |
| rs6898748   | 5  | 25,062,052  | T | C | 0.5583 | -0.0066 | 0.0011 |
| rs79503311  | 7  | 2,467,974   | T | C | 0.0394 | 0.0170  | 0.0027 |
| rs11190955  | 10 | 103,112,165 | T | C | 0.3558 | -0.0069 | 0.0011 |
| rs7905026   | 10 | 99,121,697  | A | C | 0.2604 | -0.0075 | 0.0012 |
| rs9362865   | 6  | 91,997,544  | T | C | 0.901  | 0.0110  | 0.0018 |
| rs1585272   | 2  | 97,161,749  | T | C | 0.6531 | 0.0069  | 0.0011 |
| rs6872619   | 5  | 141,686,067 | A | G | 0.1801 | -0.0085 | 0.0014 |
| rs6070254   | 20 | 56,336,730  | A | T | 0.6747 | 0.0070  | 0.0011 |
| rs9538699   | 13 | 61,013,589  | A | G | 0.2603 | 0.0075  | 0.0012 |
| rs9823931   | 3  | 131,568,323 | A | G | 0.5788 | -0.0066 | 0.0011 |

|             |    |             |   |   |        |         |        |
|-------------|----|-------------|---|---|--------|---------|--------|
| rs2063037   | 1  | 84,905,725  | C | G | 0.4317 | 0.0066  | 0.0011 |
| rs140167677 | 18 | 22,051,440  | A | G | 0.2308 | -0.0078 | 0.0012 |
| rs145836687 | 5  | 81,119,744  | A | G | 0.0975 | -0.0111 | 0.0018 |
| rs490535    | 20 | 3,001,343   | T | C | 0.3345 | 0.0069  | 0.0011 |
| rs72635790  | 1  | 8,374,253   | A | T | 0.0567 | 0.0142  | 0.0023 |
| rs1206133   | 6  | 97,543,137  | T | C | 0.7524 | 0.0076  | 0.0012 |
| rs9411446   | 9  | 135,015,927 | A | G | 0.4055 | 0.0067  | 0.0011 |
| rs200482765 | 19 | 4,510,079   | A | T | 0.6897 | -0.0082 | 0.0013 |
| rs142331290 | 17 | 7,502,034   | A | G | 0.9851 | 0.0272  | 0.0043 |
| rs12682276  | 8  | 10,099,240  | A | C | 0.8995 | 0.0109  | 0.0017 |
| rs684192    | 18 | 74,622,529  | A | G | 0.6353 | -0.0068 | 0.0011 |
| rs1324626   | 9  | 122,132,138 | T | C | 0.561  | 0.0066  | 0.0011 |
| rs5396      | 3  | 170,744,815 | T | C | 0.7158 | 0.0073  | 0.0012 |
| rs114364946 | 2  | 193,771,468 | A | T | 0.9738 | -0.0208 | 0.0033 |
| rs7402939   | 15 | 99,183,876  | T | C | 0.3789 | 0.0068  | 0.0011 |
| rs13174179  | 5  | 149,150,671 | A | G | 0.3218 | -0.0070 | 0.0011 |
| rs76583783  | 5  | 24,890,744  | A | C | 0.1777 | -0.0086 | 0.0014 |
| rs2607347   | 5  | 58,721,609  | T | C | 0.5619 | -0.0066 | 0.0011 |
| rs17760841  | 17 | 61,472,820  | T | C | 0.2325 | 0.0077  | 0.0012 |
| rs12154239  | 7  | 105,246,821 | T | C | 0.5018 | 0.0066  | 0.0010 |
| rs2769212   | 10 | 32,516,920  | A | G | 0.131  | -0.0097 | 0.0016 |
| rs1817452   | 18 | 32,356,593  | T | C | 0.8315 | -0.0087 | 0.0014 |
| rs112129485 | 3  | 182,680,766 | T | C | 0.0976 | 0.0110  | 0.0018 |
| rs1414392   | 1  | 91,162,053  | T | C | 0.5589 | -0.0066 | 0.0011 |
| rs138835177 | 14 | 29,226,713  | C | G | 0.0389 | -0.0170 | 0.0027 |
| rs7009856   | 8  | 1,146,075   | C | G | 0.3887 | 0.0067  | 0.0011 |
| rs79653698  | 11 | 65,753,304  | A | G | 0.9784 | 0.0227  | 0.0036 |
| rs3810538   | 20 | 51,067,708  | C | G | 0.0848 | -0.0117 | 0.0019 |
| rs211694    | 1  | 76,069,504  | A | C | 0.7654 | -0.0077 | 0.0012 |
| rs139331180 | 6  | 29,784,309  | A | G | 0.063  | 0.0136  | 0.0022 |
| rs7124286   | 11 | 40,058,184  | T | C | 0.8279 | 0.0087  | 0.0014 |
| rs6585490   | 10 | 120,222,019 | A | T | 0.6495 | -0.0069 | 0.0011 |
| rs405509    | 19 | 45,408,836  | T | G | 0.4811 | 0.0065  | 0.0010 |
| rs20547     | 6  | 32,826,233  | A | G | 0.9621 | 0.0186  | 0.0030 |
| rs17668674  | 16 | 72,257,540  | A | G | 0.8915 | -0.0105 | 0.0017 |
| rs9310653   | 3  | 21,723,547  | C | G | 0.9335 | 0.0131  | 0.0021 |
| rs9681368   | 3  | 185,727,948 | A | G | 0.3079 | 0.0072  | 0.0012 |
| rs10771003  | 12 | 23,710,942  | T | G | 0.7773 | 0.0079  | 0.0013 |
| rs10867548  | 9  | 83,093,792  | A | G | 0.8557 | 0.0093  | 0.0015 |
| rs1053951   | 18 | 60,232,674  | A | G | 0.5723 | -0.0066 | 0.0011 |
| rs2467974   | 8  | 133,760,154 | C | G | 0.6643 | -0.0069 | 0.0011 |
| rs72682966  | 8  | 86,374,208  | T | C | 0.0373 | -0.0205 | 0.0033 |
| rs231334    | 4  | 2,796,665   | T | C | 0.4161 | -0.0066 | 0.0011 |
| rs2841425   | 1  | 213,361,627 | A | C | 0.1794 | -0.0085 | 0.0014 |
| rs67857806  | 1  | 161,191,228 | A | G | 0.2258 | 0.0078  | 0.0013 |
| rs12922671  | 16 | 25,788,819  | T | G | 0.1523 | 0.0091  | 0.0015 |
| rs35111506  | 11 | 65,334,712  | C | G | 0.9461 | -0.0145 | 0.0023 |
| rs3770772   | 2  | 37,192,607  | T | C | 0.7452 | 0.0075  | 0.0012 |

|             |    |             |   |   |        |         |        |
|-------------|----|-------------|---|---|--------|---------|--------|
| rs2253718   | 6  | 30,900,427  | T | G | 0.3671 | 0.0069  | 0.0011 |
| rs4522099   | 10 | 108,688,242 | C | G | 0.9314 | 0.0129  | 0.0021 |
| rs10215438  | 7  | 3,524,612   | A | G | 0.5576 | 0.0066  | 0.0011 |
| rs9666212   | 11 | 29,531,097  | T | C | 0.7783 | 0.0079  | 0.0013 |
| rs117015720 | 13 | 99,232,990  | C | G | 0.0674 | 0.0132  | 0.0021 |
| rs55817320  | 2  | 210,853,849 | T | C | 0.5009 | -0.0065 | 0.0010 |
| rs2233754   | 14 | 58,755,574  | A | C | 0.0619 | -0.0135 | 0.0022 |
| rs7852096   | 9  | 1,793,162   | T | C | 0.7474 | 0.0075  | 0.0012 |
| rs3134530   | 8  | 105,499,710 | A | C | 0.3393 | 0.0069  | 0.0011 |
| rs6813653   | 4  | 122,772,313 | A | G | 0.2548 | 0.0075  | 0.0012 |
| rs4671934   | 2  | 54,687,523  | C | G | 0.5691 | -0.0066 | 0.0011 |
| rs7248145   | 19 | 12,639,911  | T | C | 0.6898 | -0.0071 | 0.0011 |
| rs142237780 | 22 | 48,030,529  | T | C | 0.0368 | 0.0176  | 0.0028 |
| rs887593    | 14 | 74,686,271  | A | G | 0.0897 | -0.0114 | 0.0018 |
| rs76631016  | 6  | 33,698,461  | T | C | 0.0514 | -0.0148 | 0.0024 |
| rs11657342  | 17 | 79,355,294  | A | G | 0.3671 | 0.0146  | 0.0023 |
| rs11191999  | 10 | 106,066,436 | T | C | 0.3175 | 0.0070  | 0.0011 |
| rs75242975  | 2  | 58,874,588  | A | G | 0.0249 | -0.0210 | 0.0034 |
| rs8000862   | 13 | 100,494,737 | A | G | 0.3587 | -0.0068 | 0.0011 |
| rs10997220  | 10 | 68,290,594  | T | C | 0.1066 | 0.0106  | 0.0017 |
| rs17663167  | 8  | 9,288,937   | T | C | 0.1621 | -0.0088 | 0.0014 |
| rs144988294 | 2  | 58,496,321  | A | T | 0.9919 | -0.0369 | 0.0059 |
| rs61746505  | 20 | 62,839,710  | C | G | 0.0483 | 0.0153  | 0.0025 |
| rs73390208  | 6  | 31,326,131  | T | C | 0.3081 | -0.0072 | 0.0012 |
| rs9602200   | 13 | 84,073,118  | T | C | 0.817  | -0.0084 | 0.0014 |
| rs6946362   | 7  | 6,574,807   | T | C | 0.6912 | 0.0071  | 0.0011 |
| rs3788337   | 22 | 23,412,017  | A | G | 0.3666 | 0.0068  | 0.0011 |
| rs12614827  | 2  | 53,071,428  | A | G | 0.387  | -0.0067 | 0.0011 |
| rs11752015  | 6  | 26,060,490  | T | C | 0.953  | -0.0154 | 0.0025 |
| rs545454    | 11 | 28,747,685  | A | G | 0.4757 | -0.0065 | 0.0010 |
| rs78094866  | 1  | 20,650,384  | T | C | 0.1274 | -0.0098 | 0.0016 |
| rs785278    | 1  | 33,307,987  | A | T | 0.1804 | 0.0085  | 0.0014 |
| rs12984717  | 19 | 1,868,461   | A | T | 0.1235 | 0.0114  | 0.0018 |
| rs2084007   | 5  | 133,891,282 | T | C | 0.4743 | -0.0065 | 0.0010 |
| rs2158507   | 7  | 69,862,423  | A | C | 0.3851 | -0.0067 | 0.0011 |
| rs12260313  | 10 | 131,692,815 | T | C | 0.2985 | 0.0071  | 0.0011 |
| rs728943    | 2  | 80,347,379  | T | C | 0.2573 | -0.0074 | 0.0012 |
| rs10753906  | 1  | 201,887,382 | C | G | 0.5414 | 0.0065  | 0.0011 |
| rs6477140   | 9  | 7,044,474   | A | G | 0.3548 | 0.0068  | 0.0011 |
| rs12699612  | 7  | 14,421,915  | A | T | 0.2556 | 0.0077  | 0.0012 |
| rs736281    | 14 | 94,287,830  | T | C | 0.389  | 0.0067  | 0.0011 |
| rs34418947  | 18 | 49,993,455  | A | G | 0.4119 | -0.0066 | 0.0011 |
| rs28767928  | 6  | 73,223,259  | A | T | 0.2854 | 0.0072  | 0.0012 |
| rs17250623  | 9  | 108,394,893 | A | G | 0.6872 | -0.0070 | 0.0011 |
| rs12922563  | 16 | 53,001,788  | T | C | 0.238  | -0.0076 | 0.0012 |
| rs2852334   | 18 | 37,233,059  | A | G | 0.4338 | 0.0065  | 0.0011 |
| rs2273551   | 11 | 33,097,691  | T | C | 0.1754 | 0.0085  | 0.0014 |
| rs75613846  | 2  | 162,043,971 | T | C | 0.9655 | 0.0180  | 0.0029 |

|             |    |             |   |   |        |         |        |
|-------------|----|-------------|---|---|--------|---------|--------|
| rs11112913  | 12 | 106,635,568 | A | G | 0.1035 | -0.0108 | 0.0017 |
| rs3781339   | 10 | 105,428,152 | T | C | 0.1954 | -0.0082 | 0.0013 |
| rs35657180  | 5  | 80,723,693  | A | T | 0.226  | 0.0078  | 0.0013 |
| rs7469285   | 9  | 22,596,808  | T | C | 0.5412 | -0.0065 | 0.0011 |
| rs2529177   | 7  | 21,373,697  | A | G | 0.8353 | 0.0087  | 0.0014 |
| rs307120    | 18 | 37,619,939  | T | C | 0.3164 | -0.0070 | 0.0011 |
| rs1263671   | 2  | 207,996,447 | T | C | 0.8335 | -0.0087 | 0.0014 |
| rs3809912   | 18 | 12,947,462  | T | C | 0.3534 | 0.0068  | 0.0011 |
| rs11690621  | 2  | 101,049,115 | T | G | 0.2919 | 0.0072  | 0.0012 |
| rs1289267   | 5  | 103,557,806 | T | C | 0.248  | -0.0075 | 0.0012 |
| rs12562745  | 1  | 72,235,421  | A | C | 0.6511 | 0.0068  | 0.0011 |
| rs73401231  | 6  | 26,329,492  | A | G | 0.148  | 0.0091  | 0.0015 |
| rs10080     | 10 | 33,467,108  | A | G | 0.4149 | -0.0066 | 0.0011 |
| rs8110747   | 19 | 36,103,517  | T | C | 0.408  | -0.0066 | 0.0011 |
| rs1861499   | 2  | 8,075,668   | A | T | 0.1693 | 0.0086  | 0.0014 |
| rs2202781   | 13 | 35,292,372  | A | G | 0.7686 | -0.0077 | 0.0012 |
| rs72938351  | 2  | 204,151,503 | A | G | 0.8933 | -0.0105 | 0.0017 |
| rs258696    | 7  | 81,759,677  | C | G | 0.7318 | 0.0073  | 0.0012 |
| rs2195041   | 18 | 64,579,525  | A | G | 0.4059 | 0.0066  | 0.0011 |
| rs4940134   | 18 | 49,277,017  | T | C | 0.2362 | 0.0076  | 0.0012 |
| rs2223928   | 14 | 26,567,802  | T | C | 0.549  | 0.0065  | 0.0011 |
| rs2088913   | 3  | 117,310,069 | A | G | 0.5699 | 0.0065  | 0.0011 |
| rs2567609   | 20 | 23,017,017  | T | C | 0.547  | -0.0065 | 0.0011 |
| rs34408666  | 3  | 121,981,609 | A | G | 0.1399 | -0.0093 | 0.0015 |
| rs6131010   | 20 | 44,724,305  | A | G | 0.2682 | -0.0073 | 0.0012 |
| rs55783571  | 8  | 14,109,499  | A | G | 0.3471 | 0.0068  | 0.0011 |
| rs76589360  | 19 | 15,413,671  | T | C | 0.8875 | 0.0103  | 0.0017 |
| rs7655515   | 4  | 91,091,035  | A | G | 0.6024 | -0.0066 | 0.0011 |
| rs17515793  | 5  | 152,887,260 | T | C | 0.3512 | 0.0068  | 0.0011 |
| rs4634051   | 3  | 122,180,728 | A | G | 0.3041 | 0.0070  | 0.0011 |
| rs35693868  | 14 | 39,880,851  | T | C | 0.2552 | 0.0074  | 0.0012 |
| rs2935212   | 1  | 213,116,133 | T | C | 0.3869 | 0.0066  | 0.0011 |
| rs1201814   | 6  | 70,917,973  | A | T | 0.4592 | -0.0065 | 0.0011 |
| rs4371620   | 4  | 102,708,235 | T | C | 0.7921 | 0.0080  | 0.0013 |
| rs10819243  | 9  | 129,633,328 | A | G | 0.6027 | 0.0066  | 0.0011 |
| rs6706197   | 2  | 198,142,269 | T | C | 0.4748 | 0.0065  | 0.0011 |
| rs2001751   | 10 | 133,914,812 | A | C | 0.4076 | -0.0066 | 0.0011 |
| rs1505676   | 4  | 62,127,291  | C | G | 0.6275 | 0.0067  | 0.0011 |
| rs7593817   | 2  | 8,022,188   | A | G | 0.6246 | 0.0067  | 0.0011 |
| rs149120550 | 19 | 13,009,789  | A | G | 0.0096 | 0.0340  | 0.0055 |
| rs78841298  | 16 | 65,723,726  | A | T | 0.0149 | 0.0268  | 0.0043 |
| rs6669004   | 1  | 110,906,780 | A | G | 0.7254 | -0.0072 | 0.0012 |
| rs35345466  | 10 | 11,604,399  | A | T | 0.2641 | 0.0073  | 0.0012 |
| rs11841508  | 13 | 88,683,971  | T | C | 0.3006 | 0.0070  | 0.0011 |
| rs4597364   | 17 | 51,875,791  | T | C | 0.6643 | -0.0069 | 0.0011 |
| rs4945872   | 6  | 111,378,759 | T | C | 0.4026 | 0.0066  | 0.0011 |
| rs116590014 | 5  | 119,947,712 | T | C | 0.2824 | 0.0072  | 0.0012 |
| rs2958370   | 8  | 71,082,718  | A | G | 0.1026 | 0.0106  | 0.0017 |

|             |    |             |   |   |        |         |        |
|-------------|----|-------------|---|---|--------|---------|--------|
| rs12054166  | 3  | 150,093,445 | C | G | 0.7352 | 0.0073  | 0.0012 |
| rs7195739   | 16 | 12,648,795  | A | G | 0.1481 | 0.0091  | 0.0015 |
| rs12425533  | 12 | 59,367,493  | A | G | 0.7542 | -0.0075 | 0.0012 |
| rs76098418  | 9  | 108,980,064 | C | G | 0.955  | -0.0156 | 0.0025 |
| rs114545261 | 6  | 25,185,063  | C | G | 0.9952 | 0.0480  | 0.0078 |
| rs146894375 | 2  | 162,283,458 | T | C | 0.0037 | -0.0551 | 0.0089 |
| rs7663065   | 4  | 28,687,406  | A | G | 0.6598 | -0.0068 | 0.0011 |
| rs13147370  | 4  | 3,282,809   | C | G | 0.2121 | -0.0079 | 0.0013 |
| rs13140513  | 4  | 97,427,696  | A | G | 0.7064 | -0.0071 | 0.0011 |
| rs111341725 | 2  | 207,258,925 | T | C | 0.1487 | -0.0091 | 0.0015 |
| rs7422004   | 2  | 161,313,637 | A | T | 0.1325 | 0.0096  | 0.0016 |
| rs77488630  | 22 | 39,783,374  | C | G | 0.0247 | 0.0210  | 0.0034 |
| rs1407536   | 6  | 16,814,885  | A | G | 0.7396 | -0.0073 | 0.0012 |
| rs7078184   | 10 | 98,250,191  | A | G | 0.1968 | -0.0081 | 0.0013 |
| rs9849462   | 3  | 132,799,943 | T | C | 0.2959 | 0.0071  | 0.0011 |
| rs2456523   | 15 | 53,082,481  | T | G | 0.7463 | 0.0074  | 0.0012 |
| rs114340522 | 2  | 206,850,862 | C | G | 0.0528 | 0.0145  | 0.0023 |
| rs77593562  | 2  | 58,951,075  | T | C | 0.1437 | 0.0092  | 0.0015 |
| rs2490392   | 1  | 243,462,523 | A | G | 0.8332 | -0.0086 | 0.0014 |
| rs139544582 | 13 | 58,825,795  | A | G | 0.9729 | 0.0202  | 0.0033 |
| rs117769860 | 10 | 8,544,627   | T | C | 0.9859 | 0.0275  | 0.0045 |
| rs10780261  | 9  | 81,434,850  | T | C | 0.845  | -0.0089 | 0.0014 |
| rs12461559  | 19 | 12,917,100  | C | G | 0.2053 | 0.0080  | 0.0013 |
| rs11603378  | 11 | 2,165,173   | T | G | 0.7497 | -0.0075 | 0.0012 |
| rs12891815  | 14 | 58,100,140  | A | T | 0.5166 | 0.0064  | 0.0010 |
| rs12915175  | 15 | 74,049,061  | A | G | 0.1833 | -0.0083 | 0.0014 |
| rs2447643   | 10 | 53,762,669  | A | G | 0.5257 | 0.0064  | 0.0010 |
| rs11180882  | 12 | 41,784,997  | T | C | 0.7638 | -0.0076 | 0.0012 |
| rs6455854   | 6  | 163,304,290 | A | G | 0.5613 | -0.0065 | 0.0011 |
| rs61350676  | 20 | 59,015,127  | A | G | 0.1752 | 0.0085  | 0.0014 |
| rs35754740  | 16 | 63,127,870  | T | C | 0.5786 | 0.0065  | 0.0011 |
| rs72625765  | 15 | 66,260,432  | A | G | 0.0746 | 0.0142  | 0.0023 |
| rs314910    | 2  | 125,960,605 | T | C | 0.4734 | -0.0064 | 0.0010 |
| rs655627    | 11 | 134,021,859 | A | G | 0.5518 | -0.0065 | 0.0011 |
| rs34543037  | 15 | 78,016,551  | T | C | 0.9108 | 0.0113  | 0.0018 |
| rs6730216   | 2  | 208,833,257 | T | C | 0.2644 | 0.0073  | 0.0012 |
| rs2743451   | 22 | 42,534,682  | T | C | 0.5392 | 0.0064  | 0.0011 |
| rs2553041   | 2  | 63,238,346  | C | G | 0.186  | 0.0083  | 0.0013 |
| rs9310565   | 3  | 18,441,277  | T | C | 0.1623 | -0.0087 | 0.0014 |
| rs17365719  | 2  | 11,073,506  | T | C | 0.1541 | 0.0089  | 0.0015 |
| rs9849808   | 3  | 81,252,454  | T | C | 0.466  | -0.0064 | 0.0010 |
| rs4246218   | 12 | 23,698,387  | C | G | 0.2398 | 0.0075  | 0.0012 |
| rs9875      | 20 | 42,825,487  | T | C | 0.6886 | -0.0069 | 0.0011 |
| rs80159981  | 1  | 162,332,368 | T | C | 0.8576 | 0.0092  | 0.0015 |
| rs7089990   | 10 | 65,077,923  | C | G | 0.9435 | -0.0140 | 0.0023 |
| rs76130193  | 12 | 116,527,742 | T | C | 0.0801 | -0.0118 | 0.0019 |
| rs3935792   | 5  | 141,231,993 | C | G | 0.5243 | -0.0065 | 0.0011 |
| rs1637492   | 7  | 87,611,115  | A | G | 0.4916 | -0.0064 | 0.0010 |

|             |    |             |   |   |        |         |        |
|-------------|----|-------------|---|---|--------|---------|--------|
| rs13158057  | 5  | 92,028,035  | T | C | 0.3254 | 0.0069  | 0.0011 |
| rs12980955  | 19 | 19,283,646  | T | C | 0.4388 | 0.0065  | 0.0011 |
| rs13291602  | 9  | 27,806,830  | T | G | 0.4468 | -0.0065 | 0.0011 |
| rs6024420   | 20 | 54,371,100  | T | C | 0.3061 | -0.0070 | 0.0011 |
| rs191569854 | 4  | 83,311,621  | C | G | 0.9496 | -0.0148 | 0.0024 |
| rs7855503   | 9  | 86,381,638  | C | G | 0.3465 | 0.0067  | 0.0011 |
| rs17307574  | 3  | 53,345,623  | T | C | 0.6004 | -0.0065 | 0.0011 |
| rs61964892  | 13 | 42,300,560  | T | C | 0.788  | -0.0078 | 0.0013 |
| rs11001230  | 10 | 76,733,768  | A | G | 0.0668 | 0.0128  | 0.0021 |
| rs12523817  | 6  | 63,142,556  | T | C | 0.7563 | 0.0075  | 0.0012 |
| rs4899200   | 14 | 39,737,911  | T | C | 0.273  | -0.0072 | 0.0012 |
| rs2810490   | 9  | 136,923,118 | A | G | 0.3032 | -0.0070 | 0.0011 |
| rs725822    | 2  | 207,732,113 | T | C | 0.6498 | 0.0067  | 0.0011 |
| rs12047108  | 1  | 191,490,610 | T | C | 0.8953 | 0.0105  | 0.0017 |
| rs7785982   | 7  | 8,457,706   | T | C | 0.1047 | -0.0105 | 0.0017 |
| rs2723461   | 7  | 13,412,732  | C | G | 0.7633 | 0.0076  | 0.0012 |
| rs3111336   | 7  | 68,812,224  | T | G | 0.3228 | -0.0069 | 0.0011 |
| rs1809471   | 11 | 43,573,947  | T | C | 0.4658 | 0.0064  | 0.0010 |
| rs11657063  | 17 | 7,745,298   | T | C | 0.1036 | 0.0105  | 0.0017 |
| rs6758002   | 2  | 194,329,828 | T | C | 0.3389 | 0.0068  | 0.0011 |
| rs234644    | 1  | 184,833,344 | A | G | 0.507  | -0.0064 | 0.0010 |
| rs6010675   | 20 | 62,468,726  | T | C | 0.9497 | -0.0148 | 0.0024 |
| rs10507085  | 12 | 97,786,700  | T | C | 0.0744 | -0.0122 | 0.0020 |
| rs7176675   | 15 | 95,257,956  | T | C | 0.3673 | -0.0066 | 0.0011 |
| rs1521754   | 2  | 139,415,944 | A | C | 0.3223 | 0.0069  | 0.0011 |
| rs7658615   | 4  | 173,508,180 | A | G | 0.5284 | -0.0064 | 0.0010 |
| rs12518098  | 5  | 60,864,467  | C | G | 0.6961 | -0.0070 | 0.0011 |
| rs12454524  | 18 | 41,455,689  | A | C | 0.2631 | -0.0073 | 0.0012 |
| rs11898641  | 2  | 100,895,162 | T | C | 0.8433 | -0.0088 | 0.0014 |
| rs10859638  | 12 | 94,433,035  | A | G | 0.2427 | -0.0075 | 0.0012 |
| rs1903358   | 5  | 92,632,605  | A | G | 0.3061 | -0.0071 | 0.0012 |
| rs7448571   | 5  | 92,643,805  | A | C | 0.7169 | -0.0071 | 0.0012 |
| rs35783321  | 5  | 167,955,301 | A | C | 0.2041 | 0.0079  | 0.0013 |
| rs138850618 | 1  | 72,618,582  | T | C | 0.9726 | 0.0198  | 0.0032 |
| rs7703179   | 5  | 169,032,330 | C | G | 0.6285 | 0.0066  | 0.0011 |
| rs118084175 | 16 | 69,125,648  | T | C | 0.0397 | -0.0164 | 0.0027 |
| rs11994287  | 8  | 24,559,154  | A | T | 0.3383 | 0.0068  | 0.0011 |
| rs197480    | 6  | 143,070,505 | T | C | 0.0423 | 0.0160  | 0.0026 |
| rs72837734  | 17 | 50,471,215  | T | G | 0.8572 | 0.0106  | 0.0017 |
| rs13295049  | 9  | 23,390,218  | A | G | 0.0317 | 0.0189  | 0.0031 |
| rs2529221   | 7  | 101,434,494 | A | G | 0.7222 | 0.0071  | 0.0012 |
| rs113831544 | 2  | 23,912,050  | A | T | 0.0522 | -0.0144 | 0.0024 |
| rs67033024  | 14 | 73,512,560  | A | G | 0.8643 | 0.0093  | 0.0015 |
| rs6043521   | 20 | 15,739,745  | T | C | 0.6007 | -0.0065 | 0.0011 |
| rs147873370 | 2  | 156,900,939 | T | C | 0.6393 | -0.0067 | 0.0011 |
| rs77607745  | 13 | 69,575,184  | A | C | 0.8134 | 0.0082  | 0.0013 |
| rs12254572  | 10 | 67,767,283  | C | G | 0.1694 | -0.0086 | 0.0014 |
| rs10018425  | 4  | 91,810,508  | T | C | 0.5202 | -0.0064 | 0.0010 |

|             |    |             |   |   |        |         |        |
|-------------|----|-------------|---|---|--------|---------|--------|
| rs6986186   | 8  | 77,752,035  | A | G | 0.9097 | -0.0112 | 0.0018 |
| rs11163064  | 1  | 81,075,626  | C | G | 0.7894 | -0.0078 | 0.0013 |
| rs2303969   | 11 | 72,536,272  | A | G | 0.3387 | -0.0068 | 0.0011 |
| rs9652254   | 13 | 84,759,044  | A | G | 0.5881 | 0.0065  | 0.0011 |
| rs34627316  | 5  | 57,960,995  | A | G | 0.0432 | -0.0157 | 0.0026 |
| rs12548560  | 8  | 130,107,054 | A | G | 0.6859 | 0.0069  | 0.0011 |
| rs56884508  | 4  | 36,740,043  | T | C | 0.8751 | 0.0097  | 0.0016 |
| rs73154546  | 22 | 34,271,689  | A | C | 0.0387 | 0.0166  | 0.0027 |
| rs402490    | 4  | 39,842,817  | T | C | 0.6501 | 0.0067  | 0.0011 |
| rs2216053   | 16 | 52,296,798  | T | G | 0.7391 | -0.0073 | 0.0012 |
| rs4957837   | 5  | 109,219,117 | A | C | 0.3224 | 0.0068  | 0.0011 |
| rs28385630  | 6  | 40,400,877  | A | G | 0.0794 | 0.0118  | 0.0019 |
| rs10177230  | 2  | 53,715,181  | T | C | 0.4924 | 0.0064  | 0.0010 |
| rs72771232  | 5  | 82,857,040  | T | C | 0.9224 | -0.0120 | 0.0020 |
| rs4470366   | 2  | 71,534,617  | A | T | 0.5842 | 0.0065  | 0.0011 |
| rs111962691 | 6  | 98,521,230  | A | G | 0.0525 | 0.0147  | 0.0024 |
| rs73040431  | 3  | 24,604,377  | A | G | 0.0763 | 0.0120  | 0.0020 |
| rs145481578 | 5  | 59,557,590  | T | C | 0.0199 | 0.0235  | 0.0039 |
| rs71529384  | 7  | 5,292,968   | A | G | 0.3697 | -0.0067 | 0.0011 |
| rs13030015  | 2  | 63,024,653  | A | G | 0.1948 | -0.0081 | 0.0013 |
| rs474000    | 18 | 2,731,752   | A | G | 0.441  | 0.0064  | 0.0011 |
| rs4860418   | 4  | 62,421,204  | T | C | 0.4884 | -0.0064 | 0.0010 |
| rs12790613  | 11 | 122,646,967 | A | G | 0.3206 | -0.0069 | 0.0011 |
| rs55749333  | 17 | 7,371,932   | T | C | 0.6416 | -0.0066 | 0.0011 |
| rs12107377  | 3  | 192,150,817 | A | G | 0.5155 | 0.0064  | 0.0010 |
| rs77363699  | 18 | 30,626,497  | A | T | 0.074  | -0.0133 | 0.0022 |
| rs12349467  | 9  | 108,831,872 | A | G | 0.6902 | 0.0069  | 0.0011 |
| rs1320163   | 3  | 43,303,296  | A | G | 0.1527 | -0.0089 | 0.0015 |
| rs10860219  | 12 | 97,959,792  | A | G | 0.8352 | 0.0086  | 0.0014 |
| rs921957    | 8  | 119,107,434 | A | G | 0.7742 | 0.0076  | 0.0013 |
| rs375817346 | 3  | 102,859,439 | A | C | 0.9393 | -0.0141 | 0.0023 |
| rs10894736  | 11 | 133,588,430 | T | C | 0.1962 | -0.0081 | 0.0013 |
| rs1490834   | 5  | 107,050,463 | A | G | 0.5352 | -0.0064 | 0.0010 |
| rs12449488  | 17 | 6,358,174   | A | G | 0.681  | -0.0068 | 0.0011 |
| rs9287526   | 2  | 140,641,552 | C | G | 0.1776 | 0.0083  | 0.0014 |
| rs6925960   | 6  | 33,968,415  | A | G | 0.0328 | -0.0181 | 0.0030 |
| rs4743729   | 9  | 99,097,872  | A | C | 0.3238 | -0.0068 | 0.0011 |
| rs3911295   | 1  | 77,838,907  | A | T | 0.18   | 0.0083  | 0.0014 |
| rs1881975   | 3  | 184,046,042 | A | G | 0.7657 | 0.0075  | 0.0012 |
| rs34891372  | 14 | 100,171,990 | A | G | 0.3779 | -0.0066 | 0.0011 |
| rs755043    | 10 | 80,110,426  | A | G | 0.5115 | -0.0064 | 0.0010 |
| rs75352055  | 1  | 93,953,600  | A | T | 0.9762 | -0.0209 | 0.0034 |
| rs7302808   | 12 | 12,420,232  | T | C | 0.4706 | 0.0064  | 0.0011 |
| rs2025258   | 14 | 24,654,489  | T | C | 0.6519 | 0.0067  | 0.0011 |
| rs74677779  | 3  | 78,381,089  | C | G | 0.9566 | -0.0156 | 0.0026 |
| rs2562733   | 7  | 128,106,870 | A | T | 0.5819 | -0.0068 | 0.0011 |
| rs11082115  | 18 | 36,508,540  | T | C | 0.4045 | 0.0065  | 0.0011 |
| rs116914290 | 16 | 750,179     | T | C | 0.0153 | 0.0264  | 0.0043 |

|            |    |             |   |   |        |         |        |
|------------|----|-------------|---|---|--------|---------|--------|
| rs10765371 | 11 | 90,344,157  | A | T | 0.8591 | -0.0091 | 0.0015 |
| rs72670235 | 1  | 67,020,516  | A | G | 0.1636 | -0.0086 | 0.0014 |
| rs17812637 | 2  | 103,585,664 | A | G | 0.0816 | 0.0116  | 0.0019 |
| rs12213071 | 6  | 118,401,119 | A | G | 0.7735 | 0.0076  | 0.0013 |
| rs56322375 | 17 | 32,906,373  | T | G | 0.2327 | -0.0076 | 0.0012 |
| rs7151406  | 14 | 50,806,723  | A | G | 0.5607 | 0.0064  | 0.0011 |
| rs10777906 | 12 | 98,542,779  | A | G | 0.4419 | 0.0064  | 0.0011 |
| rs10948447 | 6  | 48,841,940  | A | G | 0.5277 | -0.0064 | 0.0010 |
| rs12144850 | 1  | 117,995,899 | A | C | 0.7448 | 0.0073  | 0.0012 |
| rs1582890  | 5  | 113,881,132 | C | G | 0.7506 | -0.0074 | 0.0012 |
| rs19141313 | 3  | 49,745,681  | A | G | 0.011  | 0.0313  | 0.0052 |
| rs4845604  | 1  | 151,801,680 | A | G | 0.1426 | 0.0091  | 0.0015 |
| rs7981839  | 13 | 84,061,991  | A | C | 0.8194 | 0.0083  | 0.0014 |
| rs10815961 | 9  | 8,818,758   | T | C | 0.497  | 0.0063  | 0.0010 |
| rs952062   | 5  | 13,739,867  | A | T | 0.1157 | 0.0102  | 0.0017 |
| rs11166284 | 13 | 58,446,860  | T | C | 0.013  | -0.0283 | 0.0047 |
| rs4951645  | 1  | 213,045,541 | A | T | 0.5511 | 0.0064  | 0.0011 |
| rs12375473 | 9  | 23,064,528  | T | C | 0.1053 | -0.0103 | 0.0017 |
| rs73153727 | 3  | 147,652,324 | T | C | 0.0184 | -0.0239 | 0.0039 |
| rs2643765  | 7  | 128,479,367 | T | C | 0.9473 | -0.0143 | 0.0024 |
| rs34514546 | 14 | 69,833,730  | A | G | 0.0709 | 0.0125  | 0.0021 |
| rs10741228 | 10 | 129,152,153 | T | C | 0.4316 | -0.0064 | 0.0011 |
| rs2124033  | 1  | 74,327,371  | A | G | 0.7376 | -0.0073 | 0.0012 |
| rs12983038 | 19 | 39,741,124  | A | G | 0.1914 | -0.0081 | 0.0013 |
| rs4714990  | 6  | 12,927,845  | T | C | 0.6197 | 0.0065  | 0.0011 |
| rs7709041  | 5  | 12,702,044  | T | G | 0.1568 | -0.0087 | 0.0014 |
| rs17150492 | 5  | 122,916,804 | A | G | 0.9173 | 0.0115  | 0.0019 |
| rs10800641 | 1  | 199,529,533 | A | G | 0.7986 | 0.0079  | 0.0013 |
| rs155943   | 5  | 139,529,987 | A | T | 0.4714 | 0.0064  | 0.0010 |
| rs73969295 | 2  | 166,399,114 | A | G | 0.0939 | -0.0109 | 0.0018 |
| rs4484264  | 4  | 72,345,336  | A | G | 0.1601 | 0.0086  | 0.0014 |
| rs11715986 | 15 | 40,883,919  | A | C | 0.0324 | -0.0181 | 0.0030 |
| rs66523149 | 3  | 152,909,603 | T | C | 0.6817 | -0.0068 | 0.0011 |
| rs10053681 | 5  | 30,669,256  | A | G | 0.226  | 0.0076  | 0.0013 |
| rs61546403 | 5  | 106,307,386 | T | C | 0.7137 | 0.0070  | 0.0012 |
| rs80020939 | 18 | 38,905,390  | A | T | 0.0497 | -0.0146 | 0.0024 |
| rs17100414 | 14 | 74,934,621  | T | C | 0.8301 | 0.0084  | 0.0014 |
| rs10916679 | 1  | 20,286,563  | A | C | 0.2682 | 0.0071  | 0.0012 |
| rs11677652 | 2  | 160,514,224 | C | G | 0.0384 | 0.0165  | 0.0027 |
| rs485035   | 1  | 212,626,591 | A | G | 0.3112 | -0.0068 | 0.0011 |
| rs2214631  | 7  | 88,507,921  | A | T | 0.2788 | 0.0071  | 0.0012 |
| rs1943117  | 18 | 50,406,410  | T | C | 0.8486 | -0.0088 | 0.0015 |
| rs4869579  | 5  | 38,231,257  | T | C | 0.5202 | 0.0063  | 0.0010 |
| rs74677340 | 1  | 50,838,544  | T | C | 0.953  | -0.0151 | 0.0025 |
| rs10842296 | 12 | 24,395,272  | T | C | 0.2448 | 0.0074  | 0.0012 |
| rs71366589 | 17 | 4,004,590   | T | C | 0.9794 | 0.0225  | 0.0037 |
| rs74969066 | 11 | 43,264,801  | T | C | 0.07   | 0.0124  | 0.0021 |
| rs3768923  | 2  | 237,023,132 | T | G | 0.546  | 0.0064  | 0.0011 |



|             |    |             |   |   |        |         |        |
|-------------|----|-------------|---|---|--------|---------|--------|
| rs11184996  | 1  | 107,403,292 | T | C | 0.9035 | -0.0107 | 0.0018 |
| rs5768157   | 22 | 48,315,016  | A | G | 0.6631 | 0.0067  | 0.0011 |
| rs118146271 | 20 | 41,738,135  | T | C | 0.9783 | -0.0218 | 0.0036 |
| rs4775702   | 15 | 47,991,205  | T | G | 0.1759 | 0.0083  | 0.0014 |
| rs2538046   | 7  | 151,314,162 | A | G | 0.4989 | -0.0063 | 0.0010 |
| rs7114098   | 11 | 84,316,886  | A | C | 0.1691 | -0.0084 | 0.0014 |
| rs757436    | 19 | 3,826,749   | A | T | 0.4039 | 0.0065  | 0.0011 |
| rs56075787  | 17 | 80,481,434  | T | C | 0.2271 | -0.0076 | 0.0013 |
| rs12071705  | 1  | 151,430,504 | C | G | 0.8277 | 0.0084  | 0.0014 |
| rs1108512   | 6  | 17,282,415  | C | G | 0.7709 | 0.0075  | 0.0012 |
| rs34725898  | 6  | 163,127,302 | T | C | 0.1153 | 0.0099  | 0.0016 |
| rs79602383  | 17 | 11,925,336  | T | C | 0.7842 | -0.0077 | 0.0013 |
| rs13140041  | 4  | 174,352,369 | A | G | 0.5414 | -0.0064 | 0.0011 |
| rs4882141   | 11 | 48,627,525  | T | C | 0.6448 | 0.0066  | 0.0011 |
| rs468222    | 5  | 141,027,400 | C | G | 0.3105 | -0.0068 | 0.0011 |
| rs75445469  | 1  | 90,984,377  | C | G | 0.0408 | 0.0160  | 0.0026 |
| rs11752914  | 6  | 155,910,988 | T | C | 0.8043 | 0.0080  | 0.0013 |
| rs72885416  | 6  | 67,489,152  | A | T | 0.8859 | -0.0099 | 0.0016 |
| rs179942    | 6  | 16,398,917  | T | C | 0.4019 | -0.0065 | 0.0011 |
| rs724072    | 4  | 186,811,571 | A | C | 0.2784 | -0.0070 | 0.0012 |
| rs12615721  | 2  | 81,856,526  | A | G | 0.08   | -0.0116 | 0.0019 |
| rs9928897   | 16 | 13,605,058  | T | C | 0.0666 | -0.0127 | 0.0021 |
| rs72824321  | 5  | 164,445,654 | A | G | 0.0403 | -0.0161 | 0.0027 |
| rs118057662 | 9  | 83,552,501  | T | G | 0.9556 | 0.0154  | 0.0025 |
| rs143747834 | 7  | 34,675,652  | C | G | 0.2053 | -0.0078 | 0.0013 |
| rs16898036  | 4  | 19,056,417  | A | G | 0.2622 | 0.0072  | 0.0012 |
| rs1861109   | 2  | 59,384,873  | C | G | 0.3625 | 0.0066  | 0.0011 |
| rs1151282   | 16 | 54,627,052  | A | C | 0.282  | 0.0070  | 0.0012 |
| rs147448772 | 9  | 73,091,254  | A | C | 0.033  | -0.0179 | 0.0030 |
| rs2278758   | 3  | 35,779,082  | A | G | 0.121  | -0.0097 | 0.0016 |
| rs707247    | 17 | 67,426,612  | A | T | 0.4767 | 0.0063  | 0.0010 |
| rs10150280  | 14 | 72,009,999  | A | G | 0.6996 | 0.0069  | 0.0011 |
| rs12150824  | 18 | 5,922,014   | A | G | 0.2617 | 0.0072  | 0.0012 |
| rs12515501  | 5  | 168,657,869 | A | G | 0.8557 | -0.0090 | 0.0015 |
| rs6061461   | 20 | 60,815,755  | C | G | 0.4895 | -0.0063 | 0.0010 |
| rs10748559  | 10 | 93,077,075  | T | C | 0.6111 | -0.0066 | 0.0011 |
| rs12491849  | 3  | 48,531,227  | T | C | 0.3962 | -0.0065 | 0.0011 |
| rs79747966  | 2  | 239,965,444 | T | C | 0.1521 | -0.0088 | 0.0015 |
| rs7624892   | 3  | 105,220,625 | A | G | 0.8914 | 0.0101  | 0.0017 |
| rs72856150  | 6  | 40,274,667  | A | G | 0.1348 | -0.0092 | 0.0015 |
| rs55745100  | 21 | 33,016,364  | T | C | 0.9462 | -0.0140 | 0.0023 |
| rs67888396  | 3  | 2,549,510   | T | G | 0.8348 | -0.0085 | 0.0014 |
| rs58100125  | 2  | 203,040,744 | C | G | 0.3481 | 0.0066  | 0.0011 |
| rs138759391 | 4  | 3,165,646   | A | C | 0.9784 | -0.0222 | 0.0037 |
| rs4974300   | 3  | 70,635,094  | A | G | 0.22   | -0.0076 | 0.0013 |
| rs35079242  | 12 | 68,230,208  | T | G | 0.132  | -0.0093 | 0.0015 |
| rs72683987  | 1  | 44,491,905  | T | C | 0.0614 | -0.0131 | 0.0022 |
| rs1691017   | 5  | 3,246,853   | A | G | 0.4754 | 0.0063  | 0.0010 |

|             |    |             |   |   |        |         |        |
|-------------|----|-------------|---|---|--------|---------|--------|
| rs9729347   | 1  | 99,130,265  | T | C | 0.6914 | -0.0068 | 0.0011 |
| rs12209720  | 6  | 112,998,611 | T | C | 0.7379 | -0.0072 | 0.0012 |
| rs1514572   | 4  | 130,160,706 | A | C | 0.4554 | -0.0063 | 0.0011 |
| rs9813034   | 3  | 137,281,630 | T | G | 0.6467 | -0.0066 | 0.0011 |
| rs13284474  | 9  | 119,622,710 | T | C | 0.4413 | 0.0063  | 0.0011 |
| rs2313547   | 4  | 16,427,592  | T | C | 0.5026 | 0.0063  | 0.0010 |
| rs1862611   | 5  | 63,074,852  | A | T | 0.3207 | 0.0068  | 0.0011 |
| rs2028789   | 13 | 94,113,389  | T | C | 0.1378 | 0.0091  | 0.0015 |
| rs1217437   | 2  | 50,535,942  | C | G | 0.3781 | 0.0065  | 0.0011 |
| rs62070652  | 17 | 29,221,277  | T | C | 0.2705 | -0.0071 | 0.0012 |
| rs138465058 | 3  | 71,617,859  | A | G | 0.1059 | -0.0103 | 0.0017 |
| rs10441105  | 7  | 41,821,956  | C | G | 0.4858 | 0.0063  | 0.0010 |
| rs2237429   | 7  | 42,031,224  | A | C | 0.1917 | 0.0080  | 0.0013 |
| rs12078410  | 1  | 179,409,877 | T | C | 0.4731 | 0.0063  | 0.0010 |
| rs112706692 | 10 | 69,047,439  | T | C | 0.0238 | 0.0214  | 0.0036 |
| rs75681403  | 4  | 3,212,495   | C | G | 0.9756 | -0.0206 | 0.0034 |
| rs7086516   | 10 | 103,805,076 | T | C | 0.7509 | 0.0073  | 0.0012 |
| rs4940668   | 18 | 56,032,231  | A | G | 0.7003 | -0.0069 | 0.0011 |
| rs11793547  | 9  | 134,831,595 | A | T | 0.0154 | -0.0256 | 0.0043 |
| rs34124911  | 3  | 169,854,671 | T | C | 0.5886 | -0.0064 | 0.0011 |
| rs729432    | 16 | 73,791,860  | A | G | 0.5776 | -0.0064 | 0.0011 |
| rs113179456 | 2  | 51,347,742  | T | C | 0.0205 | 0.0224  | 0.0037 |
| rs6717169   | 2  | 142,180,831 | T | C | 0.8065 | 0.0080  | 0.0013 |
| rs2395973   | 8  | 131,011,699 | T | C | 0.2707 | 0.0071  | 0.0012 |
| rs17767951  | 6  | 66,143,736  | C | G | 0.7582 | -0.0080 | 0.0013 |
| rs374722    | 2  | 147,839,830 | A | G | 0.8497 | 0.0088  | 0.0015 |
| rs76335349  | 7  | 126,490,550 | A | G | 0.0919 | -0.0109 | 0.0018 |
| rs113731629 | 4  | 170,984,229 | T | C | 0.9865 | 0.0274  | 0.0046 |
| rs1001060   | 11 | 112,537,243 | T | C | 0.5343 | 0.0063  | 0.0010 |
| rs8043948   | 16 | 65,603,269  | A | G | 0.482  | -0.0063 | 0.0010 |
| rs1650823   | 11 | 129,758,327 | A | G | 0.7041 | 0.0069  | 0.0011 |
| rs2960270   | 7  | 101,933,047 | A | G | 0.8236 | 0.0083  | 0.0014 |
| rs80090296  | 18 | 42,110,459  | T | C | 0.1693 | -0.0084 | 0.0014 |
| rs1226950   | 2  | 230,174,164 | A | G | 0.9456 | 0.0138  | 0.0023 |
| rs10875882  | 12 | 49,260,691  | T | C | 0.4641 | -0.0063 | 0.0010 |
| rs7326484   | 13 | 89,733,492  | A | T | 0.2142 | 0.0077  | 0.0013 |
| rs34632631  | 21 | 46,561,110  | T | C | 0.0307 | -0.0184 | 0.0031 |
| rs1063478   | 6  | 32,917,544  | T | C | 0.1242 | -0.0095 | 0.0016 |
| rs28415206  | 1  | 230,176,827 | T | G | 0.7981 | 0.0078  | 0.0013 |
| rs72713578  | 1  | 174,399,558 | C | G | 0.0736 | 0.0121  | 0.0020 |
| rs148189988 | 3  | 107,974,309 | A | G | 0.0096 | 0.0332  | 0.0055 |
| rs35280154  | 1  | 211,022,376 | A | C | 0.6233 | -0.0065 | 0.0011 |
| rs1427323   | 14 | 59,416,842  | T | C | 0.313  | 0.0068  | 0.0011 |
| rs1006749   | 20 | 41,716,653  | A | G | 0.5199 | 0.0063  | 0.0011 |
| rs348036    | 13 | 80,792,899  | T | G | 0.1936 | -0.0080 | 0.0013 |
| rs2194890   | 4  | 68,071,570  | T | C | 0.7593 | 0.0074  | 0.0012 |
| rs9861585   | 3  | 77,714,670  | T | C | 0.5375 | 0.0063  | 0.0010 |
| rs77397926  | 2  | 142,341,391 | T | C | 0.6111 | -0.0064 | 0.0011 |

|             |    |             |   |   |        |         |        |
|-------------|----|-------------|---|---|--------|---------|--------|
| rs11884242  | 2  | 61,846,674  | C | G | 0.1808 | 0.0082  | 0.0014 |
| rs2596125   | 8  | 76,642,325  | T | C | 0.4163 | 0.0064  | 0.0011 |
| rs73224985  | 3  | 139,711,322 | A | G | 0.7929 | -0.0077 | 0.0013 |
| rs637096    | 6  | 6,555,790   | A | G | 0.4187 | 0.0064  | 0.0011 |
| rs55809234  | 14 | 29,809,876  | T | C | 0.9609 | 0.0164  | 0.0027 |
| rs9267650   | 6  | 31,824,912  | A | T | 0.9514 | 0.0146  | 0.0024 |
| rs2797131   | 10 | 32,085,988  | A | G | 0.22   | 0.0076  | 0.0013 |
| rs12117137  | 1  | 34,205,134  | T | C | 0.6672 | 0.0067  | 0.0011 |
| rs474210    | 6  | 148,244,701 | A | C | 0.4802 | -0.0063 | 0.0010 |
| rs12976992  | 19 | 50,818,776  | A | G | 0.5222 | -0.0063 | 0.0011 |
| rs9875943   | 3  | 34,676,421  | A | G | 0.1097 | 0.0100  | 0.0017 |
| rs12692542  | 2  | 160,065,027 | A | G | 0.2234 | 0.0075  | 0.0013 |
| rs17007397  | 3  | 70,594,975  | C | G | 0.5821 | 0.0063  | 0.0011 |
| rs7134506   | 12 | 23,860,334  | T | C | 0.4363 | -0.0063 | 0.0011 |
| rs2237432   | 7  | 41,735,034  | T | C | 0.7528 | -0.0073 | 0.0012 |
| rs3910785   | 18 | 49,849,857  | T | C | 0.6684 | 0.0066  | 0.0011 |
| rs11184849  | 1  | 106,851,037 | T | C | 0.3528 | -0.0066 | 0.0011 |
| rs112045865 | 3  | 118,619,880 | C | G | 0.0306 | -0.0187 | 0.0031 |
| rs78731367  | 3  | 47,400,308  | T | C | 0.0337 | 0.0177  | 0.0030 |
| rs9318984   | 13 | 84,438,318  | A | G | 0.051  | -0.0142 | 0.0024 |
| rs2044169   | 17 | 2,394,896   | A | G | 0.3217 | 0.0068  | 0.0011 |
| rs10095575  | 8  | 41,327,101  | T | C | 0.0473 | -0.0147 | 0.0025 |
| rs10155336  | 4  | 22,280,964  | C | G | 0.0416 | -0.0157 | 0.0026 |
| rs28737363  | 5  | 4,230,573   | A | C | 0.3004 | -0.0069 | 0.0012 |
| rs1429370   | 2  | 141,599,025 | C | G | 0.0704 | -0.0122 | 0.0020 |
| rs6547148   | 2  | 77,747,513  | T | C | 0.459  | 0.0063  | 0.0011 |
| rs10821375  | 9  | 97,363,859  | T | C | 0.4407 | 0.0063  | 0.0011 |
| rs7665498   | 4  | 25,001,578  | T | C | 0.4199 | -0.0063 | 0.0011 |
| rs17706089  | 7  | 67,064,242  | T | C | 0.8156 | -0.0081 | 0.0013 |
| rs9626920   | 22 | 46,428,993  | A | G | 0.4113 | 0.0064  | 0.0011 |
| rs4544378   | 2  | 161,246,317 | T | C | 0.4252 | 0.0064  | 0.0011 |
| rs11871722  | 17 | 61,675,576  | T | C | 0.2626 | 0.0071  | 0.0012 |
| rs2008486   | 14 | 89,863,756  | A | C | 0.5046 | -0.0063 | 0.0010 |
| rs13434878  | 4  | 130,542,951 | A | C | 0.2983 | -0.0068 | 0.0011 |
| rs139472275 | 2  | 103,895,426 | T | C | 0.1189 | 0.0097  | 0.0016 |
| rs34805686  | 1  | 41,807,416  | A | G | 0.0272 | -0.0193 | 0.0032 |
| rs11755280  | 6  | 118,117,246 | T | C | 0.7393 | -0.0071 | 0.0012 |
| rs57810758  | 14 | 49,941,647  | A | G | 0.8967 | 0.0103  | 0.0017 |
| rs533123    | 1  | 29,141,155  | A | G | 0.8058 | -0.0079 | 0.0013 |
| rs483368    | 3  | 118,141,050 | A | C | 0.8494 | 0.0087  | 0.0015 |
| rs2240662   | 19 | 32,537,173  | T | G | 0.342  | -0.0066 | 0.0011 |
| rs7754547   | 6  | 69,347,206  | T | G | 0.6967 | -0.0068 | 0.0011 |
| rs356903    | 18 | 26,284,807  | T | C | 0.2517 | -0.0072 | 0.0012 |
| rs12437429  | 14 | 33,126,543  | A | G | 0.3002 | 0.0068  | 0.0011 |
| rs28714464  | 1  | 97,857,902  | T | C | 0.2042 | 0.0078  | 0.0013 |
| rs7825105   | 8  | 111,600,991 | A | G | 0.2775 | -0.0070 | 0.0012 |
| rs2154209   | 14 | 57,586,697  | T | C | 0.7976 | -0.0078 | 0.0013 |
| rs11919143  | 3  | 118,675,744 | A | T | 0.2405 | 0.0073  | 0.0012 |

|             |    |               |   |        |         |        |
|-------------|----|---------------|---|--------|---------|--------|
| rs13298735  | 9  | 75,082,726 T  | C | 0.9643 | -0.0168 | 0.0028 |
| rs1379472   | 12 | 23,327,638 T  | C | 0.5207 | -0.0062 | 0.0010 |
| rs1054378   | 17 | 7,215,536 T   | C | 0.4233 | 0.0063  | 0.0011 |
| rs4074661   | 6  | 16,901,138 A  | G | 0.3984 | -0.0064 | 0.0011 |
| rs6440854   | 3  | 152,948,430 A | G | 0.8769 | 0.0095  | 0.0016 |
| rs9968      | 6  | 29,501,037 C  | G | 0.5266 | -0.0063 | 0.0011 |
| rs12473320  | 2  | 115,650,305 A | G | 0.4902 | 0.0062  | 0.0010 |
| rs987000    | 7  | 122,308,992 T | C | 0.1968 | -0.0078 | 0.0013 |
| rs7749979   | 6  | 52,220,229 T  | C | 0.7073 | -0.0068 | 0.0012 |
| rs7125115   | 11 | 118,478,330 A | G | 0.3748 | -0.0065 | 0.0011 |
| rs2543621   | 8  | 30,870,317 A  | G | 0.9664 | 0.0178  | 0.0030 |
| rs35170529  | 5  | 111,818,951 T | C | 0.8861 | -0.0098 | 0.0016 |
| rs17101344  | 14 | 33,970,832 A  | G | 0.7695 | -0.0074 | 0.0013 |
| rs116844765 | 12 | 87,135,645 T  | G | 0.9893 | -0.0304 | 0.0051 |
| rs80216782  | 1  | 97,830,969 T  | C | 0.1374 | -0.0091 | 0.0015 |
| rs12333     | 15 | 65,869,272 T  | C | 0.2476 | -0.0072 | 0.0012 |
| rs112650421 | 12 | 101,399,617 T | G | 0.0236 | -0.0206 | 0.0035 |
| rs114871711 | 3  | 49,806,982 C  | G | 0.0208 | 0.0221  | 0.0037 |
| rs517052    | 1  | 234,760,600 A | T | 0.5954 | -0.0064 | 0.0011 |
| rs1925623   | 10 | 68,771,397 T  | C | 0.4233 | 0.0063  | 0.0011 |
| rs2934510   | 5  | 2,920,100 T   | C | 0.2309 | 0.0074  | 0.0012 |
| rs1470516   | 1  | 159,573,150 A | G | 0.4386 | 0.0063  | 0.0011 |
| rs79692137  | 18 | 36,140,233 C  | G | 0.1148 | -0.0098 | 0.0016 |
| rs2815312   | 1  | 77,761,377 T  | C | 0.199  | -0.0078 | 0.0013 |
| rs9599628   | 13 | 70,911,605 T  | C | 0.3607 | 0.0065  | 0.0011 |
| rs2223728   | 21 | 22,233,992 A  | G | 0.3506 | -0.0065 | 0.0011 |
| rs2675049   | 2  | 183,893,285 T | C | 0.9039 | 0.0105  | 0.0018 |
| rs11641504  | 16 | 10,205,824 C  | G | 0.7142 | -0.0069 | 0.0012 |
| rs115318845 | 2  | 82,900,454 T  | C | 0.0143 | -0.0263 | 0.0044 |
| rs2854394   | 3  | 48,621,593 T  | C | 0.969  | -0.0180 | 0.0030 |
| rs7584255   | 2  | 213,848,727 T | C | 0.7521 | 0.0072  | 0.0012 |
| rs80111165  | 2  | 51,550,071 T  | G | 0.8762 | 0.0095  | 0.0016 |
| rs16890200  | 5  | 59,095,673 T  | C | 0.067  | -0.0124 | 0.0021 |
| rs74844193  | 1  | 153,615,820 A | G | 0.0161 | -0.0295 | 0.0050 |
| rs565522    | 1  | 112,261,533 T | C | 0.5635 | 0.0063  | 0.0011 |
| rs73040337  | 3  | 18,457,943 T  | C | 0.7712 | -0.0074 | 0.0013 |
| rs141503355 | 7  | 1,924,215 T   | C | 0.013  | -0.0284 | 0.0048 |
| rs4821904   | 22 | 39,902,525 T  | C | 0.6061 | 0.0064  | 0.0011 |
| rs13102416  | 4  | 83,325,914 A  | C | 0.5795 | -0.0063 | 0.0011 |
| rs12447904  | 16 | 60,452,186 T  | G | 0.6111 | 0.0064  | 0.0011 |
| rs1501312   | 16 | 13,137,096 T  | G | 0.6904 | 0.0067  | 0.0011 |
| rs10860215  | 12 | 97,863,578 T  | C | 0.134  | -0.0091 | 0.0015 |
| rs17516383  | 19 | 54,926,182 A  | G | 0.3112 | 0.0069  | 0.0012 |
| rs1404549   | 3  | 65,454,923 A  | G | 0.3231 | -0.0066 | 0.0011 |
| rs803786    | 13 | 71,621,124 A  | G | 0.6083 | 0.0064  | 0.0011 |
| rs59832377  | 20 | 18,571,333 T  | C | 0.5576 | -0.0062 | 0.0011 |
| rs10032922  | 4  | 1,781,296 T   | C | 0.3275 | 0.0067  | 0.0011 |
| rs142662811 | 3  | 49,590,756 T  | C | 0.0037 | -0.0533 | 0.0090 |

|             |    |             |   |   |        |         |        |
|-------------|----|-------------|---|---|--------|---------|--------|
| rs6748621   | 2  | 32,262,201  | T | C | 0.6074 | 0.0064  | 0.0011 |
| rs115828262 | 2  | 60,905,863  | T | C | 0.0108 | -0.0303 | 0.0051 |
| rs6860867   | 5  | 113,657,556 | A | G | 0.1571 | 0.0085  | 0.0014 |
| rs10900534  | 1  | 203,915,457 | T | C | 0.555  | 0.0062  | 0.0011 |
| rs62070561  | 17 | 50,560,183  | A | T | 0.9642 | -0.0170 | 0.0029 |
| rs8048012   | 16 | 13,918,873  | A | G | 0.1729 | 0.0082  | 0.0014 |
| rs10736856  | 9  | 135,490,787 | T | C | 0.6739 | 0.0066  | 0.0011 |
| rs4737137   | 8  | 40,344,076  | T | C | 0.7432 | 0.0071  | 0.0012 |
| rs10965856  | 9  | 23,424,336  | A | G | 0.9256 | 0.0119  | 0.0020 |
| rs77928496  | 3  | 82,663,937  | A | G | 0.8601 | 0.0090  | 0.0015 |
| rs7123652   | 11 | 117,377,518 | T | C | 0.767  | -0.0073 | 0.0012 |
| rs17021464  | 3  | 84,405,133  | C | G | 0.0476 | -0.0145 | 0.0025 |
| rs17144422  | 16 | 7,690,419   | T | C | 0.1706 | -0.0082 | 0.0014 |
| rs10743083  | 11 | 8,636,350   | A | G | 0.1775 | 0.0082  | 0.0014 |
| rs10920336  | 1  | 202,115,945 | A | G | 0.5208 | 0.0062  | 0.0011 |
| rs72725852  | 1  | 87,720,852  | T | C | 0.3216 | 0.0066  | 0.0011 |
| rs9342683   | 6  | 68,786,751  | A | G | 0.8506 | -0.0087 | 0.0015 |
| rs55972942  | 15 | 51,426,007  | T | C | 0.6574 | -0.0065 | 0.0011 |
| rs7070247   | 10 | 11,151,151  | A | G | 0.2616 | -0.0070 | 0.0012 |
| rs12231481  | 12 | 23,739,437  | T | C | 0.1817 | -0.0080 | 0.0014 |
| rs1524442   | 7  | 113,060,880 | T | C | 0.5422 | 0.0062  | 0.0011 |
| rs10164318  | 19 | 33,459,298  | T | G | 0.3276 | 0.0066  | 0.0011 |
| rs1360224   | 9  | 23,713,125  | C | G | 0.2392 | -0.0073 | 0.0012 |
| rs77694416  | 5  | 122,423,650 | A | G | 0.0723 | 0.0120  | 0.0020 |
| rs4971091   | 1  | 155,143,768 | T | G | 0.3694 | -0.0064 | 0.0011 |
| rs10256396  | 7  | 151,124,989 | A | C | 0.3382 | 0.0065  | 0.0011 |
| rs373789515 | 7  | 2,141,956   | A | G | 0.011  | -0.0343 | 0.0058 |
| rs111444532 | 2  | 161,565,445 | A | G | 0.9343 | -0.0125 | 0.0021 |
| rs12156187  | 8  | 17,049,377  | A | C | 0.8367 | -0.0084 | 0.0014 |
| rs2481061   | 9  | 33,106,139  | A | G | 0.4162 | 0.0063  | 0.0011 |
| rs9998726   | 4  | 131,315,417 | T | C | 0.4311 | -0.0063 | 0.0011 |
| rs71365671  | 18 | 35,227,017  | T | C | 0.0764 | 0.0119  | 0.0020 |
| rs12905247  | 15 | 82,236,187  | T | G | 0.5135 | 0.0062  | 0.0010 |
| rs75888251  | 10 | 65,218,832  | T | C | 0.0716 | 0.0123  | 0.0021 |
| rs785113    | 1  | 40,154,983  | T | C | 0.2265 | 0.0074  | 0.0013 |
| rs7505415   | 18 | 37,685,909  | A | G | 0.2634 | -0.0070 | 0.0012 |
| rs4909854   | 8  | 136,017,359 | T | G | 0.6173 | -0.0064 | 0.0011 |
| rs10142459  | 14 | 92,577,044  | T | C | 0.546  | 0.0062  | 0.0011 |
| rs1446332   | 15 | 80,666,739  | T | C | 0.3428 | 0.0065  | 0.0011 |
| rs526156    | 6  | 69,556,840  | A | C | 0.1108 | -0.0098 | 0.0017 |
| rs10054805  | 5  | 62,607,104  | T | C | 0.1208 | 0.0095  | 0.0016 |
| rs217181    | 16 | 72,114,002  | T | C | 0.194  | -0.0078 | 0.0013 |
| rs3818083   | 14 | 101,979,747 | A | T | 0.4658 | 0.0062  | 0.0010 |
| rs2499738   | 6  | 33,910,243  | C | G | 0.5793 | -0.0063 | 0.0011 |
| rs191103    | 14 | 59,092,075  | T | C | 0.4862 | 0.0062  | 0.0010 |
| rs4663416   | 2  | 235,363,663 | T | C | 0.5336 | 0.0062  | 0.0010 |
| rs17698176  | 17 | 44,819,595  | T | G | 0.7864 | -0.0076 | 0.0013 |
| rs80322007  | 6  | 157,771,378 | T | C | 0.7688 | -0.0075 | 0.0013 |

|             |    |               |   |        |         |        |
|-------------|----|---------------|---|--------|---------|--------|
| rs4879832   | 9  | 34,830,432 T  | C | 0.3772 | -0.0064 | 0.0011 |
| rs67190144  | 15 | 93,469,932 T  | G | 0.2482 | 0.0072  | 0.0012 |
| rs28622594  | 16 | 5,436,281 A   | G | 0.4422 | -0.0062 | 0.0011 |
| rs62622853  | 11 | 70,333,498 T  | C | 0.9737 | 0.0196  | 0.0033 |
| rs77232327  | 1  | 74,295,238 A  | G | 0.9399 | 0.0130  | 0.0022 |
| rs13213319  | 6  | 71,081,376 T  | G | 0.4408 | -0.0062 | 0.0011 |
| rs2216009   | 2  | 40,590,958 T  | G | 0.4502 | 0.0062  | 0.0011 |
| rs1610243   | 3  | 104,225,506 T | C | 0.6186 | -0.0064 | 0.0011 |
| rs7543410   | 1  | 232,618,155 T | G | 0.2422 | 0.0072  | 0.0012 |
| rs75225029  | 1  | 174,126,401 T | C | 0.9936 | 0.0393  | 0.0067 |
| rs12801458  | 11 | 93,442,982 A  | T | 0.0784 | -0.0115 | 0.0020 |
| rs72697581  | 4  | 167,893,608 A | G | 0.9248 | 0.0118  | 0.0020 |
| rs6784009   | 3  | 20,326,562 A  | G | 0.8455 | 0.0085  | 0.0014 |
| rs113528211 | 2  | 172,842,478 A | T | 0.7686 | 0.0077  | 0.0013 |
| rs79925479  | 20 | 47,855,655 T  | G | 0.0555 | 0.0135  | 0.0023 |
| rs115923460 | 1  | 98,370,438 A  | T | 0.9824 | 0.0236  | 0.0040 |
| rs11708735  | 3  | 159,940,306 T | C | 0.2731 | 0.0069  | 0.0012 |
| rs73006987  | 2  | 155,398,762 A | G | 0.8655 | -0.0091 | 0.0015 |
| rs138190448 | 8  | 145,878,521 A | G | 0.9904 | 0.0325  | 0.0055 |
| rs28494514  | 4  | 7,889,715 A   | G | 0.4388 | 0.0062  | 0.0011 |
| rs7184863   | 16 | 64,935,433 T  | G | 0.8196 | 0.0080  | 0.0014 |
| rs3900166   | 2  | 211,255,870 A | T | 0.5632 | 0.0062  | 0.0011 |
| rs34010978  | 5  | 144,509,298 A | G | 0.09   | 0.0108  | 0.0018 |
| rs34417622  | 2  | 107,611,917 A | G | 0.1654 | 0.0083  | 0.0014 |
| rs7027899   | 9  | 14,248,934 A  | G | 0.81   | 0.0114  | 0.0019 |
| rs72879788  | 2  | 166,509,620 T | C | 0.869  | 0.0091  | 0.0016 |
| rs2632667   | 12 | 131,271,293 A | G | 0.5062 | -0.0062 | 0.0010 |
| rs73456245  | 18 | 56,911,835 T  | C | 0.2206 | 0.0075  | 0.0013 |
| rs1472009   | 16 | 83,452,585 A  | G | 0.5983 | -0.0063 | 0.0011 |
| rs11768912  | 7  | 104,294,485 T | C | 0.8749 | 0.0093  | 0.0016 |
| rs7111304   | 11 | 45,788,120 A  | C | 0.1384 | 0.0089  | 0.0015 |
| rs26956     | 5  | 59,790,985 A  | C | 0.2824 | -0.0068 | 0.0012 |
| rs80133217  | 4  | 176,723,030 A | T | 0.0466 | 0.0151  | 0.0026 |
| rs503525    | 5  | 152,899,250 T | C | 0.1542 | -0.0085 | 0.0015 |
| rs2074882   | 19 | 1,969,477 T   | G | 0.3926 | 0.0063  | 0.0011 |
| rs117755721 | 17 | 11,881,356 A  | G | 0.0268 | 0.0194  | 0.0033 |
| rs4739408   | 8  | 35,312,380 T  | G | 0.5363 | 0.0062  | 0.0010 |
| rs4989480   | 22 | 32,025,318 A  | G | 0.8578 | -0.0089 | 0.0015 |
| rs62069505  | 17 | 51,892,547 T  | C | 0.7449 | -0.0071 | 0.0012 |
| rs1706916   | 7  | 105,274,812 A | G | 0.5723 | -0.0062 | 0.0011 |
| rs116199888 | 2  | 50,574,836 A  | T | 0.9586 | -0.0157 | 0.0027 |
| rs56238233  | 3  | 165,804,488 A | C | 0.8891 | 0.0098  | 0.0017 |
| rs34580115  | 12 | 123,525,280 A | G | 0.7062 | 0.0068  | 0.0012 |
| rs1492027   | 3  | 167,469,955 A | G | 0.7806 | 0.0074  | 0.0013 |
| rs11001967  | 10 | 78,768,415 A  | G | 0.4364 | -0.0062 | 0.0011 |
| rs2729790   | 15 | 63,466,427 T  | C | 0.3759 | 0.0064  | 0.0011 |
| rs7027123   | 9  | 122,012,643 T | C | 0.4523 | -0.0062 | 0.0011 |
| rs295544    | 5  | 60,488,167 A  | G | 0.8124 | 0.0079  | 0.0013 |

|             |    |             |   |   |        |         |        |
|-------------|----|-------------|---|---|--------|---------|--------|
| rs10046843  | 9  | 34,631,159  | T | C | 0.3491 | -0.0064 | 0.0011 |
| rs79754409  | 8  | 5,903,561   | A | T | 0.8039 | 0.0077  | 0.0013 |
| rs7015683   | 8  | 145,611,719 | T | G | 0.5684 | 0.0062  | 0.0011 |
| rs10262862  | 7  | 132,956,034 | T | C | 0.6092 | 0.0063  | 0.0011 |
| rs7922859   | 10 | 118,485,415 | T | C | 0.7496 | 0.0071  | 0.0012 |
| rs77366811  | 17 | 19,266,620  | T | G | 0.0265 | -0.0193 | 0.0033 |
| rs7598129   | 2  | 142,494,704 | T | C | 0.9069 | 0.0106  | 0.0018 |
| rs10793903  | 9  | 134,976,652 | A | G | 0.114  | 0.0097  | 0.0017 |
| rs62356962  | 5  | 56,561,108  | T | C | 0.8561 | -0.0088 | 0.0015 |
| rs10822116  | 10 | 64,822,584  | C | G | 0.8081 | 0.0078  | 0.0013 |
| rs263771    | 2  | 185,921,692 | A | C | 0.2219 | -0.0074 | 0.0013 |
| rs34855181  | 2  | 35,559,282  | C | G | 0.4629 | 0.0062  | 0.0010 |
| rs10894382  | 11 | 131,243,413 | T | C | 0.2084 | 0.0076  | 0.0013 |
| rs78278808  | 13 | 42,869,485  | A | G | 0.0537 | 0.0137  | 0.0023 |
| rs8067165   | 17 | 8,031,936   | C | G | 0.3993 | -0.0063 | 0.0011 |
| rs28536514  | 1  | 910,409     | T | C | 0.8776 | 0.0098  | 0.0017 |
| rs7980228   | 12 | 9,240,336   | A | C | 0.9077 | 0.0106  | 0.0018 |
| rs11657896  | 17 | 32,461,364  | T | G | 0.3778 | 0.0063  | 0.0011 |
| rs7074897   | 10 | 26,539,683  | A | T | 0.8191 | 0.0080  | 0.0014 |
| rs6491346   | 13 | 97,915,471  | A | G | 0.0371 | -0.0163 | 0.0028 |
| rs7968682   | 12 | 66,371,880  | T | G | 0.5211 | -0.0061 | 0.0010 |
| rs6953350   | 7  | 132,029,229 | T | C | 0.5853 | -0.0062 | 0.0011 |
| rs73220261  | 7  | 122,276,437 | T | C | 0.9768 | 0.0207  | 0.0035 |
| rs55719303  | 2  | 10,976,524  | A | G | 0.7918 | 0.0076  | 0.0013 |
| rs2173108   | 4  | 44,840,802  | T | C | 0.136  | 0.0089  | 0.0015 |
| rs2905934   | 11 | 17,888,607  | T | C | 0.4212 | -0.0062 | 0.0011 |
| rs77301614  | 5  | 139,355,681 | T | C | 0.921  | -0.0114 | 0.0019 |
| rs2856327   | 12 | 11,939,472  | T | C | 0.154  | -0.0092 | 0.0016 |
| rs10977124  | 9  | 8,458,271   | A | G | 0.2382 | -0.0072 | 0.0012 |
| rs4859423   | 4  | 77,031,022  | T | C | 0.8771 | 0.0093  | 0.0016 |
| rs10098073  | 8  | 143,309,504 | A | C | 0.4789 | -0.0061 | 0.0010 |
| rs34249205  | 9  | 140,508,031 | A | G | 0.8669 | 0.0090  | 0.0015 |
| rs6557911   | 8  | 26,189,230  | T | G | 0.6567 | 0.0065  | 0.0011 |
| rs138329002 | 15 | 65,998,371  | A | G | 0.0161 | 0.0246  | 0.0042 |
| rs117350940 | 16 | 72,059,840  | T | C | 0.0171 | 0.0237  | 0.0040 |
| rs78102134  | 17 | 55,889,297  | A | G | 0.0872 | 0.0109  | 0.0019 |
| rs10117409  | 9  | 126,722,513 | A | G | 0.9299 | -0.0120 | 0.0021 |
| rs62372017  | 5  | 59,796,548  | T | C | 0.9809 | -0.0230 | 0.0039 |
| rs267152    | 3  | 76,857,965  | A | C | 0.8618 | -0.0089 | 0.0015 |
| rs483673    | 3  | 151,792,185 | A | G | 0.2455 | -0.0071 | 0.0012 |
| rs34943464  | 2  | 191,251,875 | A | G | 0.3697 | -0.0063 | 0.0011 |
| rs7707006   | 5  | 27,161,172  | A | G | 0.2846 | 0.0068  | 0.0012 |
| rs4997055   | 5  | 133,844,545 | T | C | 0.108  | -0.0099 | 0.0017 |
| rs13026866  | 2  | 181,045,656 | T | C | 0.4379 | -0.0062 | 0.0011 |
| rs114275882 | 3  | 70,342,180  | T | C | 0.9104 | -0.0111 | 0.0019 |
| rs4872389   | 8  | 25,909,499  | T | C | 0.2305 | -0.0073 | 0.0012 |
| rs7517857   | 1  | 4,725,585   | A | G | 0.438  | -0.0062 | 0.0011 |
| rs2729987   | 8  | 33,977,161  | T | C | 0.7863 | 0.0075  | 0.0013 |

|            |    |             |   |   |        |         |        |
|------------|----|-------------|---|---|--------|---------|--------|
| rs35226705 | 19 | 46,301,456  | A | C | 0.5358 | 0.0061  | 0.0011 |
| rs6994168  | 8  | 111,505,925 | C | G | 0.7765 | 0.0074  | 0.0013 |
| rs62488688 | 8  | 9,912,613   | A | G | 0.8363 | -0.0083 | 0.0014 |
| rs2021871  | 7  | 150,071,156 | T | C | 0.6738 | 0.0065  | 0.0011 |
| rs28561815 | 15 | 47,292,863  | T | G | 0.2955 | 0.0068  | 0.0012 |
| rs6767119  | 3  | 128,988,225 | T | C | 0.1094 | -0.0098 | 0.0017 |
| rs9969765  | 9  | 87,489,785  | C | G | 0.34   | -0.0065 | 0.0011 |
| rs73055568 | 2  | 194,641,042 | T | G | 0.0581 | -0.0133 | 0.0023 |
| rs190737   | 1  | 26,899,444  | A | C | 0.5287 | -0.0061 | 0.0010 |
| rs10875972 | 12 | 50,210,535  | A | G | 0.3409 | 0.0065  | 0.0011 |
| rs2001628  | 8  | 81,303,039  | A | G | 0.6133 | 0.0063  | 0.0011 |
| rs14162703 | 2  | 61,427,563  | A | G | 0.0252 | -0.0199 | 0.0034 |
| rs4347543  | 14 | 49,403,910  | T | C | 0.6274 | -0.0063 | 0.0011 |
| rs35039660 | 1  | 244,278,121 | T | C | 0.9457 | -0.0136 | 0.0023 |
| rs35769536 | 6  | 163,553,106 | A | G | 0.8486 | 0.0085  | 0.0015 |
| rs9598123  | 13 | 60,927,098  | T | C | 0.2214 | -0.0074 | 0.0013 |
| rs12638960 | 3  | 167,171,499 | A | G | 0.09   | 0.0107  | 0.0018 |
| rs35065151 | 4  | 168,048,900 | A | G | 0.4411 | -0.0062 | 0.0011 |
| rs9663072  | 1  | 103,588,507 | A | G | 0.6985 | -0.0067 | 0.0011 |
| rs2958942  | 17 | 52,948,889  | T | C | 0.7459 | 0.0070  | 0.0012 |
| rs4414947  | 4  | 21,088,559  | T | C | 0.5846 | 0.0063  | 0.0011 |
| rs2531687  | 10 | 118,637,809 | A | G | 0.3794 | 0.0063  | 0.0011 |
| rs2535692  | 22 | 18,157,282  | A | G | 0.2731 | 0.0069  | 0.0012 |
| rs10995839 | 10 | 52,900,447  | A | C | 0.8424 | -0.0084 | 0.0014 |
| rs14487300 | 7  | 126,149,386 | T | C | 0.0131 | -0.0277 | 0.0047 |
| rs11142096 | 19 | 13,312,329  | T | C | 0.1711 | -0.0082 | 0.0014 |
| rs9929596  | 16 | 76,068,215  | T | C | 0.2386 | -0.0072 | 0.0012 |
| rs14991455 | 4  | 79,697,870  | A | C | 0.0349 | 0.0172  | 0.0030 |
| rs9537509  | 13 | 57,509,685  | T | C | 0.7447 | -0.0070 | 0.0012 |
| rs18397751 | 3  | 49,378,793  | A | T | 0.9936 | 0.0401  | 0.0069 |
| rs7336436  | 13 | 69,211,536  | T | G | 0.1753 | 0.0080  | 0.0014 |
| rs11884297 | 2  | 106,013,248 | T | C | 0.4092 | -0.0062 | 0.0011 |
| rs73196184 | 13 | 67,808,183  | A | G | 0.1041 | 0.0100  | 0.0017 |
| rs34620457 | 3  | 145,133,629 | A | G | 0.2479 | 0.0071  | 0.0012 |
| rs11159622 | 10 | 104,025,716 | T | C | 0.0351 | 0.0166  | 0.0028 |
| rs35577661 | 17 | 1,871,020   | T | G | 0.7369 | -0.0069 | 0.0012 |
| rs11307116 | 7  | 75,144,552  | T | C | 0.8775 | 0.0094  | 0.0016 |
| rs79667528 | 6  | 98,223,662  | T | C | 0.9626 | 0.0162  | 0.0028 |
| rs79109558 | 9  | 7,171,041   | T | C | 0.0237 | 0.0201  | 0.0034 |
| rs7754982  | 6  | 113,203,779 | A | G | 0.1936 | -0.0077 | 0.0013 |
| rs72973714 | 18 | 74,076,020  | T | C | 0.0654 | 0.0125  | 0.0021 |
| rs72816393 | 2  | 60,259,060  | A | G | 0.7346 | 0.0069  | 0.0012 |
| rs76522376 | 4  | 7,291,339   | T | C | 0.7138 | 0.0068  | 0.0012 |
| rs1190413  | 2  | 233,313,268 | A | G | 0.3306 | 0.0065  | 0.0011 |
| rs62194510 | 2  | 238,895,507 | A | G | 0.3842 | 0.0063  | 0.0011 |
| rs4894674  | 3  | 174,170,684 | T | C | 0.5381 | 0.0061  | 0.0010 |
| rs18763658 | 1  | 175,088,774 | T | C | 0.23   | 0.0082  | 0.0014 |
| rs62434865 | 6  | 100,171,058 | A | T | 0.2418 | 0.0071  | 0.0012 |



|            |    |             |   |   |        |         |        |
|------------|----|-------------|---|---|--------|---------|--------|
| rs10030552 | 4  | 140,972,264 | A | C | 0.2588 | -0.0070 | 0.0012 |
| rs11020370 | 11 | 93,204,641  | T | C | 0.8226 | -0.0080 | 0.0014 |
| rs6693597  | 1  | 61,582,546  | T | G | 0.8645 | 0.0090  | 0.0015 |
| rs12151015 | 19 | 48,101,797  | C | G | 0.8835 | -0.0096 | 0.0016 |
| rs6700683  | 1  | 171,478,706 | A | T | 0.4651 | 0.0062  | 0.0011 |
| rs988875   | 22 | 33,939,558  | A | G | 0.6619 | -0.0064 | 0.0011 |
| rs7839607  | 8  | 93,199,456  | A | G | 0.6302 | -0.0063 | 0.0011 |
| rs12987269 | 2  | 173,921,991 | A | G | 0.7083 | 0.0067  | 0.0012 |
| rs11467754 | 11 | 84,933,332  | A | T | 0.9784 | -0.0210 | 0.0036 |
| rs1003242  | 6  | 99,594,857  | T | C | 0.7675 | 0.0072  | 0.0012 |
| rs34813542 | 13 | 59,486,309  | T | C | 0.9183 | 0.0113  | 0.0019 |
| rs57761687 | 6  | 124,760,516 | A | T | 0.0628 | 0.0145  | 0.0025 |
| rs11462313 | 1  | 51,141,894  | T | C | 0.0383 | -0.0159 | 0.0027 |
| rs72930017 | 18 | 50,521,426  | T | C | 0.1095 | -0.0099 | 0.0017 |
| rs11198999 | 1  | 29,270,194  | T | C | 0.0341 | -0.0170 | 0.0029 |
| rs4450738  | 3  | 65,595,897  | A | C | 0.2376 | -0.0072 | 0.0012 |
| rs2265364  | 10 | 96,145,246  | T | C | 0.5604 | 0.0061  | 0.0011 |
| rs56756454 | 1  | 20,701,777  | C | G | 0.9948 | -0.0448 | 0.0077 |
| rs12514257 | 5  | 122,118,222 | T | C | 0.8001 | 0.0076  | 0.0013 |
| rs28627593 | 4  | 31,368,363  | A | C | 0.2625 | 0.0069  | 0.0012 |
| rs62367470 | 5  | 45,192,276  | T | C | 0.1768 | 0.0080  | 0.0014 |
| rs72850884 | 6  | 37,964,338  | T | C | 0.9082 | 0.0106  | 0.0018 |
| rs57463591 | 2  | 105,869,624 | T | C | 0.129  | 0.0091  | 0.0016 |
| rs1447065  | 8  | 105,166,515 | A | G | 0.7151 | -0.0067 | 0.0012 |
| rs10837657 | 11 | 41,542,564  | A | C | 0.6607 | -0.0064 | 0.0011 |
| rs1382693  | 3  | 36,314,923  | A | T | 0.6055 | -0.0062 | 0.0011 |
| rs9817011  | 3  | 135,009,299 | T | G | 0.3866 | 0.0063  | 0.0011 |
| rs45570933 | 20 | 62,591,460  | A | G | 0.0713 | 0.0119  | 0.0020 |
| rs12378022 | 9  | 119,938,782 | T | C | 0.7734 | 0.0073  | 0.0013 |
| rs56103251 | 4  | 140,681,684 | T | C | 0.0623 | 0.0126  | 0.0022 |
| rs17638442 | 18 | 36,020,536  | A | C | 0.657  | 0.0064  | 0.0011 |
| rs6963810  | 7  | 5,329,448   | A | G | 0.317  | -0.0066 | 0.0011 |
| rs4991300  | 13 | 91,666,188  | A | G | 0.4781 | -0.0070 | 0.0012 |
| rs921231   | 8  | 92,360,396  | T | C | 0.8497 | 0.0085  | 0.0015 |
| rs6692379  | 1  | 99,221,575  | A | G | 0.1897 | -0.0078 | 0.0013 |
| rs4794105  | 17 | 48,237,895  | T | C | 0.4697 | -0.0061 | 0.0011 |
| rs11024359 | 11 | 17,669,791  | A | G | 0.6014 | -0.0067 | 0.0012 |
| rs11368135 | 6  | 64,956,081  | T | C | 0.7102 | 0.0076  | 0.0013 |
| rs7350509  | 11 | 111,723,205 | T | C | 0.0953 | 0.0104  | 0.0018 |
| rs79486828 | 5  | 153,340,264 | T | C | 0.0727 | 0.0117  | 0.0020 |
| rs16903327 | 5  | 36,763,558  | A | G | 0.6078 | -0.0062 | 0.0011 |
| rs10044403 | 5  | 67,653,042  | A | C | 0.0495 | -0.0142 | 0.0024 |
| rs4615623  | 9  | 134,777,994 | C | G | 0.3395 | -0.0064 | 0.0011 |
| rs55017729 | 8  | 77,328,885  | T | C | 0.9972 | -0.0609 | 0.0105 |
| rs669952   | 2  | 4,563,477   | A | G | 0.1875 | 0.0078  | 0.0013 |
| rs13791948 | 11 | 29,362,812  | A | G | 0.0162 | 0.0242  | 0.0042 |
| rs9294420  | 6  | 89,774,167  | A | C | 0.5815 | -0.0062 | 0.0011 |
| rs13079474 | 3  | 68,343,973  | A | G | 0.4089 | -0.0062 | 0.0011 |

|             |    |             |   |   |        |         |        |
|-------------|----|-------------|---|---|--------|---------|--------|
| rs4741426   | 9  | 14,747,412  | A | G | 0.8084 | -0.0077 | 0.0013 |
| rs35585468  | 10 | 31,133,581  | T | C | 0.884  | -0.0095 | 0.0016 |
| rs10877343  | 12 | 60,222,028  | A | C | 0.4825 | -0.0061 | 0.0010 |
| rs158839    | 5  | 163,071,831 | A | C | 0.612  | -0.0062 | 0.0011 |
| rs6728111   | 2  | 25,554,805  | A | G | 0.4671 | 0.0061  | 0.0010 |
| rs10440955  | 7  | 11,282,369  | T | C | 0.4717 | 0.0061  | 0.0010 |
| rs7985198   | 13 | 43,796,169  | A | G | 0.6285 | -0.0063 | 0.0011 |
| rs79532062  | 20 | 59,846,819  | T | C | 0.034  | -0.0194 | 0.0033 |
| rs35625885  | 15 | 96,957,969  | A | G | 0.8745 | 0.0092  | 0.0016 |
| rs2431472   | 5  | 62,757,949  | T | C | 0.3476 | 0.0064  | 0.0011 |
| rs9309192   | 2  | 50,937,515  | T | C | 0.1058 | 0.0099  | 0.0017 |
| rs35761435  | 4  | 186,698,194 | C | G | 0.2891 | 0.0067  | 0.0012 |
| rs10823262  | 10 | 70,625,646  | C | G | 0.2045 | -0.0075 | 0.0013 |
| rs62369456  | 5  | 63,855,663  | C | G | 0.8772 | 0.0093  | 0.0016 |
| rs6773982   | 3  | 184,894,478 | A | T | 0.0596 | -0.0128 | 0.0022 |
| rs4688370   | 3  | 63,074,219  | T | C | 0.1539 | 0.0084  | 0.0015 |
| rs62251261  | 3  | 44,148,253  | A | T | 0.7486 | -0.0070 | 0.0012 |
| rs56354797  | 7  | 68,681,873  | A | G | 0.4491 | -0.0061 | 0.0011 |
| rs9951150   | 18 | 52,821,124  | A | G | 0.5451 | 0.0061  | 0.0011 |
| rs4812681   | 20 | 41,786,802  | C | G | 0.5782 | 0.0061  | 0.0011 |
| rs2726818   | 4  | 183,147,436 | A | G | 0.0925 | -0.0105 | 0.0018 |
| rs4255791   | 16 | 28,274,804  | A | G | 0.3249 | -0.0065 | 0.0011 |
| rs8018636   | 14 | 29,742,199  | T | C | 0.8858 | 0.0096  | 0.0016 |
| rs1999395   | 9  | 13,211,721  | C | G | 0.3014 | -0.0066 | 0.0011 |
| rs7873029   | 9  | 126,776,123 | T | C | 0.0583 | -0.0129 | 0.0022 |
| rs6783675   | 3  | 76,975,431  | A | C | 0.4126 | -0.0062 | 0.0011 |
| rs150953251 | 7  | 75,802,434  | A | C | 0.9858 | -0.0259 | 0.0045 |
| rs3106836   | 4  | 179,070,445 | A | G | 0.3861 | -0.0062 | 0.0011 |
| rs4447403   | 15 | 92,235,954  | T | C | 0.7445 | 0.0070  | 0.0012 |
| rs77580062  | 8  | 42,311,083  | T | C | 0.0662 | 0.0123  | 0.0021 |
| rs112512725 | 3  | 24,905,460  | T | G | 0.9326 | -0.0121 | 0.0021 |
| rs2118204   | 2  | 128,624,111 | T | C | 0.5891 | -0.0062 | 0.0011 |
| rs737787    | 22 | 30,072,759  | T | C | 0.8188 | 0.0079  | 0.0014 |
| rs76618617  | 3  | 56,519,454  | T | C | 0.6716 | -0.0065 | 0.0011 |
| rs183782410 | 7  | 69,668,937  | A | T | 0.9574 | -0.0151 | 0.0026 |
| rs1871032   | 11 | 67,434,010  | T | C | 0.493  | -0.0061 | 0.0011 |
| rs2911653   | 2  | 220,921,082 | A | C | 0.6279 | 0.0063  | 0.0011 |
| rs4972778   | 2  | 176,483,881 | T | C | 0.5709 | -0.0061 | 0.0011 |
| rs62532857  | 9  | 14,432,343  | A | G | 0.1482 | -0.0085 | 0.0015 |
| rs424387    | 12 | 124,610,849 | C | G | 0.5933 | -0.0062 | 0.0011 |
| rs72798055  | 5  | 111,061,104 | A | G | 0.0395 | 0.0156  | 0.0027 |
| rs6439359   | 3  | 132,223,229 | T | C | 0.4698 | -0.0061 | 0.0010 |
| rs17480064  | 2  | 36,632,783  | T | C | 0.067  | 0.0122  | 0.0021 |
| rs16855816  | 2  | 169,624,261 | A | G | 0.8963 | 0.0099  | 0.0017 |
| rs115164411 | 2  | 28,304,915  | T | C | 0.976  | 0.0198  | 0.0034 |
| rs12001662  | 9  | 120,406,009 | T | C | 0.435  | 0.0061  | 0.0011 |
| rs34423561  | 11 | 1,552,276   | A | G | 0.009  | 0.0328  | 0.0057 |
| rs61265411  | 2  | 80,591,784  | C | G | 0.9656 | 0.0167  | 0.0029 |

|             |    |             |   |   |        |         |        |
|-------------|----|-------------|---|---|--------|---------|--------|
| rs4559697   | 11 | 121,439,878 | A | G | 0.2926 | -0.0067 | 0.0012 |
| rs7959047   | 12 | 23,282,145  | A | G | 0.053  | -0.0135 | 0.0023 |
| rs11583404  | 1  | 145,640,157 | T | C | 0.6373 | -0.0063 | 0.0011 |
| rs10509353  | 10 | 76,840,388  | A | C | 0.9866 | 0.0272  | 0.0047 |
| rs5011548   | 11 | 99,066,239  | A | C | 0.9105 | -0.0106 | 0.0018 |
| rs1561743   | 3  | 100,084,203 | C | G | 0.7591 | 0.0071  | 0.0012 |
| rs28542042  | 15 | 74,213,357  | T | C | 0.2995 | 0.0066  | 0.0011 |
| rs185068134 | 7  | 67,233,784  | A | G | 0.9671 | 0.0174  | 0.0030 |
| rs7270807   | 20 | 19,631,980  | T | C | 0.9347 | -0.0122 | 0.0021 |
| rs62121816  | 19 | 39,164,464  | T | C | 0.4615 | 0.0061  | 0.0010 |
| rs144241352 | 6  | 115,574,188 | A | T | 0.0341 | -0.0169 | 0.0029 |
| rs7235898   | 18 | 9,466,467   | A | G | 0.2777 | 0.0068  | 0.0012 |
| rs75208931  | 7  | 125,999,345 | T | C | 0.8557 | -0.0087 | 0.0015 |
| rs16878083  | 4  | 11,100,788  | A | G | 0.7709 | -0.0072 | 0.0012 |
| rs62327424  | 4  | 142,623,499 | A | G | 0.0991 | 0.0101  | 0.0018 |
| rs2634436   | 8  | 18,423,590  | T | C | 0.25   | 0.0070  | 0.0012 |
| rs3112178   | 2  | 38,960,967  | A | G | 0.2514 | -0.0070 | 0.0012 |
| rs4519786   | 4  | 22,297,399  | A | T | 0.63   | 0.0063  | 0.0011 |
| rs115792144 | 6  | 68,045,016  | T | C | 0.0324 | 0.0171  | 0.0030 |
| rs9375477   | 6  | 127,204,623 | A | G | 0.8352 | -0.0082 | 0.0014 |
| rs10984798  | 9  | 122,778,574 | C | G | 0.1873 | 0.0078  | 0.0013 |
| rs6809208   | 3  | 178,542,817 | T | C | 0.6633 | 0.0064  | 0.0011 |
| rs17034606  | 4  | 105,473,010 | A | G | 0.1167 | 0.0094  | 0.0016 |
| rs1725373   | 1  | 91,299,202  | T | C | 0.0988 | 0.0101  | 0.0018 |
| rs3111049   | 5  | 160,842,709 | A | C | 0.1423 | 0.0086  | 0.0015 |
| rs11787746  | 9  | 23,353,277  | A | G | 0.9577 | -0.0152 | 0.0026 |
| rs61274751  | 5  | 65,688,417  | T | C | 0.8821 | 0.0094  | 0.0016 |
| rs12473986  | 2  | 173,682,948 | T | C | 0.2867 | -0.0067 | 0.0012 |
| rs28694048  | 18 | 73,105,302  | A | G | 0.3606 | -0.0063 | 0.0011 |
| rs12362273  | 11 | 110,022,157 | A | C | 0.761  | -0.0071 | 0.0012 |
| rs1759684   | 1  | 112,964,612 | A | G | 0.6512 | -0.0063 | 0.0011 |
| rs2138042   | 10 | 91,269,887  | A | G | 0.1622 | -0.0082 | 0.0014 |
| rs12266933  | 10 | 92,912,588  | A | G | 0.1102 | -0.0097 | 0.0017 |
| rs6595530   | 5  | 123,863,028 | A | T | 0.4426 | 0.0061  | 0.0011 |
| rs12609965  | 19 | 13,917,866  | A | C | 0.245  | 0.0071  | 0.0012 |
| rs118178868 | 17 | 19,141,885  | A | G | 0.9912 | 0.0338  | 0.0059 |
| rs10974256  | 9  | 3,952,892   | A | G | 0.3448 | -0.0064 | 0.0011 |
| rs881562    | 16 | 7,760,884   | T | G | 0.5086 | 0.0061  | 0.0010 |
| rs62086577  | 17 | 74,537,095  | A | G | 0.2153 | 0.0074  | 0.0013 |
| rs2081201   | 16 | 66,042,790  | T | C | 0.6199 | 0.0062  | 0.0011 |
| rs621996    | 1  | 70,583,889  | A | G | 0.6251 | 0.0062  | 0.0011 |
| rs11898813  | 2  | 7,417,009   | A | G | 0.4688 | -0.0060 | 0.0010 |
| rs232423    | 21 | 22,755,223  | A | G | 0.3589 | -0.0063 | 0.0011 |
| rs7247619   | 19 | 56,216,940  | A | G | 0.1007 | -0.0100 | 0.0017 |
| rs13017699  | 2  | 30,376,345  | A | T | 0.5636 | 0.0061  | 0.0011 |
| rs79454302  | 8  | 41,589,468  | T | C | 0.0446 | -0.0147 | 0.0025 |
| rs10026104  | 4  | 171,835,472 | A | G | 0.5889 | -0.0061 | 0.0011 |
| rs4822173   | 22 | 42,996,149  | A | G | 0.1368 | -0.0088 | 0.0015 |

|             |    |             |   |   |        |         |        |
|-------------|----|-------------|---|---|--------|---------|--------|
| rs1057908   | 12 | 49,230,035  | T | G | 0.5263 | 0.0060  | 0.0010 |
| rs6741676   | 2  | 181,618,654 | A | G | 0.6672 | -0.0064 | 0.0011 |
| rs6758504   | 2  | 55,453,099  | T | C | 0.5101 | -0.0060 | 0.0010 |
| rs28589407  | 22 | 27,565,662  | T | C | 0.9772 | 0.0202  | 0.0035 |
| rs4855037   | 3  | 181,466,810 | T | G | 0.425  | -0.0061 | 0.0011 |
| rs1322131   | 9  | 14,017,185  | A | C | 0.4289 | -0.0061 | 0.0011 |
| rs117407988 | 11 | 30,438,344  | A | G | 0.0309 | 0.0174  | 0.0030 |
| rs2819806   | 14 | 85,146,608  | C | G | 0.7497 | 0.0070  | 0.0012 |
| rs11874177  | 18 | 70,614,375  | T | G | 0.2825 | -0.0067 | 0.0012 |
| rs4472912   | 11 | 39,449,092  | T | C | 0.6045 | -0.0062 | 0.0011 |
| rs11125653  | 2  | 56,997,660  | A | G | 0.137  | 0.0088  | 0.0015 |
| rs17404787  | 7  | 8,551,958   | A | T | 0.6858 | -0.0065 | 0.0011 |
| rs62486443  | 8  | 12,624,999  | A | G | 0.3249 | 0.0065  | 0.0011 |
| rs181433805 | 12 | 49,642,428  | T | C | 0.0667 | 0.0122  | 0.0021 |
| rs9501224   | 6  | 32,792,910  | T | C | 0.2795 | -0.0075 | 0.0013 |
| rs17486657  | 1  | 23,007,175  | T | C | 0.3116 | 0.0065  | 0.0011 |
| rs7015738   | 8  | 110,811,185 | T | C | 0.4207 | -0.0061 | 0.0011 |
| rs34959108  | 4  | 143,824,360 | A | G | 0.7663 | -0.0071 | 0.0012 |
| rs7070545   | 10 | 1,055,868   | A | G | 0.6319 | -0.0062 | 0.0011 |
| rs12549644  | 8  | 4,305,023   | A | G | 0.8469 | -0.0084 | 0.0015 |
| rs9920856   | 15 | 97,563,302  | C | G | 0.4675 | -0.0060 | 0.0010 |
| rs55969652  | 1  | 204,389,170 | A | G | 0.0849 | 0.0108  | 0.0019 |
| rs2801804   | 14 | 42,569,023  | C | G | 0.7363 | 0.0079  | 0.0014 |
| rs11604247  | 11 | 113,846,904 | T | C | 0.0894 | -0.0105 | 0.0018 |
| rs6504417   | 17 | 64,379,240  | T | C | 0.3446 | -0.0063 | 0.0011 |
| rs3731321   | 7  | 92,327,765  | T | C | 0.8386 | 0.0082  | 0.0014 |
| rs7184582   | 16 | 7,244,175   | A | C | 0.5295 | 0.0060  | 0.0010 |
| rs716357    | 4  | 174,062,064 | A | G | 0.3904 | 0.0062  | 0.0011 |
| rs3738030   | 1  | 154,575,315 | A | C | 0.8756 | 0.0091  | 0.0016 |
| rs1536155   | 1  | 2,408,661   | A | G | 0.3586 | -0.0063 | 0.0011 |
| rs9997032   | 4  | 94,386,763  | A | G | 0.6636 | -0.0064 | 0.0011 |
| rs997076    | 4  | 96,963,418  | A | C | 0.9091 | -0.0105 | 0.0018 |
| rs577710    | 12 | 24,534,491  | A | G | 0.6436 | 0.0063  | 0.0011 |
| rs2194492   | 2  | 152,146,194 | C | G | 0.4831 | -0.0060 | 0.0010 |
| rs75587544  | 10 | 65,019,677  | T | C | 0.9814 | 0.0225  | 0.0039 |
| rs10916738  | 1  | 20,579,409  | T | C | 0.2866 | 0.0070  | 0.0012 |
| rs149630275 | 9  | 14,101,921  | C | G | 0.0176 | -0.0232 | 0.0040 |
| rs72681238  | 8  | 140,627,593 | T | C | 0.9329 | -0.0120 | 0.0021 |
| rs4706938   | 6  | 82,910,247  | C | G | 0.5549 | 0.0061  | 0.0011 |
| rs2297674   | 1  | 32,163,950  | C | G | 0.6476 | -0.0063 | 0.0011 |
| rs6560155   | 9  | 73,444,040  | T | C | 0.7184 | -0.0067 | 0.0012 |
| rs11714574  | 3  | 58,380,465  | A | T | 0.5807 | -0.0061 | 0.0011 |
| rs12142143  | 1  | 236,854,973 | T | C | 0.4715 | 0.0060  | 0.0010 |
| rs6868691   | 5  | 7,303,877   | A | G | 0.1441 | -0.0086 | 0.0015 |
| rs8067005   | 17 | 46,119,775  | T | C | 0.2116 | -0.0074 | 0.0013 |
| rs2289240   | 1  | 76,485,092  | A | T | 0.2934 | 0.0066  | 0.0011 |
| rs78833645  | 11 | 131,313,602 | T | C | 0.0399 | -0.0154 | 0.0027 |
| rs12188092  | 5  | 167,499,048 | T | C | 0.1093 | -0.0096 | 0.0017 |

|             |    |             |   |   |        |         |        |
|-------------|----|-------------|---|---|--------|---------|--------|
| rs9880138   | 3  | 135,468,347 | T | C | 0.9082 | -0.0104 | 0.0018 |
| rs138914098 | 9  | 1,737,111   | A | G | 0.0239 | 0.0198  | 0.0035 |
| rs2355468   | 11 | 17,668,754  | A | C | 0.6124 | -0.0068 | 0.0012 |
| rs3913581   | 3  | 76,439,750  | T | G | 0.5925 | -0.0061 | 0.0011 |
| rs557675    | 11 | 65,566,719  | T | G | 0.5355 | -0.0060 | 0.0010 |
| rs149790470 | 22 | 30,072,419  | C | G | 0.9888 | -0.0288 | 0.0050 |
| rs73206183  | 13 | 69,297,662  | T | C | 0.9274 | -0.0116 | 0.0020 |
| rs1152505   | 14 | 56,824,215  | A | C | 0.4984 | 0.0060  | 0.0010 |
| rs149389569 | 4  | 130,796,925 | T | C | 0.2704 | 0.0068  | 0.0012 |
| rs11839514  | 13 | 93,938,706  | A | G | 0.6541 | 0.0063  | 0.0011 |
| rs11232546  | 11 | 80,937,020  | T | C | 0.6582 | 0.0063  | 0.0011 |
| rs12992717  | 2  | 156,497,235 | C | G | 0.3435 | -0.0063 | 0.0011 |
| rs6477558   | 9  | 109,875,953 | C | G | 0.731  | 0.0068  | 0.0012 |
| rs2296956   | 9  | 134,404,784 | C | G | 0.3597 | 0.0063  | 0.0011 |
| rs4858191   | 3  | 20,437,608  | C | G | 0.395  | -0.0061 | 0.0011 |
| rs6978797   | 7  | 34,909,303  | T | C | 0.6544 | 0.0063  | 0.0011 |
| rs12793532  | 11 | 101,418,581 | A | G | 0.8727 | -0.0090 | 0.0016 |
| rs12470285  | 2  | 233,864,457 | T | C | 0.1597 | -0.0082 | 0.0014 |
| rs164700    | 5  | 106,908,733 | A | C | 0.1663 | -0.0081 | 0.0014 |
| rs80315050  | 1  | 198,027,455 | T | C | 0.0428 | -0.0149 | 0.0026 |
| rs79257925  | 3  | 174,051,148 | T | C | 0.226  | 0.0072  | 0.0013 |
| rs61937385  | 12 | 116,702,506 | T | C | 0.8919 | 0.0097  | 0.0017 |
| rs2146820   | 13 | 28,066,458  | T | C | 0.4393 | 0.0060  | 0.0011 |
| rs408889    | 6  | 160,454,552 | A | C | 0.3465 | -0.0063 | 0.0011 |
| rs55657858  | 13 | 77,151,382  | A | G | 0.6443 | -0.0063 | 0.0011 |
| rs7806216   | 7  | 105,295,609 | A | G | 0.0722 | 0.0116  | 0.0020 |
| rs11717211  | 3  | 196,681,938 | A | G | 0.4735 | 0.0060  | 0.0011 |
| rs11972612  | 7  | 67,251,422  | T | C | 0.3234 | -0.0064 | 0.0011 |
| rs723219    | 10 | 4,160,551   | T | C | 0.9287 | 0.0117  | 0.0020 |
| rs1815612   | 1  | 244,363,173 | T | C | 0.1529 | 0.0083  | 0.0015 |
| rs4662909   | 2  | 130,057,509 | A | G | 0.6358 | -0.0062 | 0.0011 |
| rs16823799  | 2  | 183,698,691 | A | G | 0.0845 | 0.0108  | 0.0019 |
| rs60433601  | 1  | 38,607,408  | T | C | 0.5996 | -0.0061 | 0.0011 |
| rs503558    | 1  | 110,100,913 | T | C | 0.3869 | 0.0062  | 0.0011 |
| rs13275806  | 8  | 87,585,300  | T | G | 0.9093 | 0.0104  | 0.0018 |
| rs12686734  | 9  | 120,297,383 | A | T | 0.408  | 0.0061  | 0.0011 |
| rs4266641   | 8  | 74,383,660  | T | C | 0.5451 | 0.0060  | 0.0011 |
| rs111646742 | 2  | 128,582,281 | T | C | 0.0378 | -0.0157 | 0.0027 |
| rs75890844  | 18 | 39,047,694  | A | G | 0.0604 | -0.0126 | 0.0022 |
| rs4885748   | 13 | 81,620,930  | A | G | 0.6762 | 0.0064  | 0.0011 |
| rs60291849  | 2  | 5,399,482   | A | T | 0.617  | -0.0062 | 0.0011 |
| rs16844417  | 1  | 172,377,745 | A | G | 0.1166 | -0.0093 | 0.0016 |
| rs149352678 | 7  | 54,920,906  | T | C | 0.0979 | 0.0101  | 0.0018 |
| rs9576167   | 13 | 37,649,395  | T | C | 0.5802 | 0.0061  | 0.0011 |
| rs1406947   | 20 | 33,969,530  | T | C | 0.603  | -0.0061 | 0.0011 |
| rs4734229   | 8  | 93,451,686  | T | G | 0.3749 | -0.0062 | 0.0011 |
| rs11741009  | 5  | 56,751,453  | T | C | 0.2225 | -0.0072 | 0.0013 |
| rs78689892  | 8  | 48,157,788  | T | C | 0.9608 | -0.0154 | 0.0027 |

|             |    |             |   |   |        |         |        |
|-------------|----|-------------|---|---|--------|---------|--------|
| rs31947     | 5  | 11,461,390  | A | G | 0.9164 | -0.0108 | 0.0019 |
| rs4549506   | 5  | 76,935,933  | A | T | 0.4957 | 0.0060  | 0.0010 |
| rs111535462 | 12 | 53,923,641  | T | C | 0.0303 | -0.0174 | 0.0031 |
| rs146295822 | 2  | 186,458,492 | C | G | 0.9268 | -0.0115 | 0.0020 |
| rs10229695  | 7  | 67,108,519  | A | G | 0.2959 | -0.0065 | 0.0011 |
| rs74615093  | 16 | 69,122,043  | A | G | 0.0743 | 0.0114  | 0.0020 |
| rs2989754   | 9  | 96,376,157  | A | G | 0.753  | 0.0069  | 0.0012 |
| rs35564420  | 19 | 6,266,614   | T | C | 0.7645 | -0.0070 | 0.0012 |
| rs374827    | 1  | 200,874,327 | T | C | 0.4936 | 0.0060  | 0.0010 |
| rs115246530 | 5  | 59,948,936  | T | C | 0.0091 | -0.0319 | 0.0056 |
| rs7774177   | 6  | 111,579,045 | A | G | 0.4476 | -0.0060 | 0.0011 |
| rs71639287  | 5  | 92,966,176  | A | G | 0.0289 | 0.0180  | 0.0032 |
| rs12676895  | 8  | 763,540     | A | G | 0.7519 | 0.0069  | 0.0012 |
| rs2233962   | 6  | 31,080,981  | T | C | 0.8173 | 0.0077  | 0.0014 |
| rs149460422 | 8  | 93,318,113  | A | C | 0.0314 | 0.0177  | 0.0031 |
| rs10737305  | 1  | 174,923,045 | C | G | 0.5002 | -0.0060 | 0.0010 |
| rs62305818  | 4  | 101,733,710 | T | C | 0.1121 | -0.0095 | 0.0017 |
| rs853345    | 6  | 14,166,582  | A | G | 0.2452 | 0.0070  | 0.0012 |
| rs2190368   | 2  | 151,752,775 | A | G | 0.509  | 0.0060  | 0.0010 |
| rs79838927  | 10 | 130,498,994 | A | G | 0.9057 | 0.0103  | 0.0018 |
| rs4233974   | 2  | 59,295,043  | T | C | 0.621  | -0.0062 | 0.0011 |
| rs80049472  | 10 | 68,771,787  | A | G | 0.1076 | -0.0096 | 0.0017 |
| rs62482199  | 7  | 99,968,371  | T | C | 0.1141 | 0.0094  | 0.0016 |
| rs13155750  | 5  | 88,167,641  | A | G | 0.7674 | -0.0071 | 0.0012 |
| rs115843100 | 6  | 31,499,713  | C | G | 0.0064 | -0.0385 | 0.0067 |
| rs149904061 | 6  | 127,993,398 | T | C | 0.0314 | 0.0172  | 0.0030 |
| rs7098962   | 10 | 12,359,441  | T | C | 0.566  | 0.0061  | 0.0011 |
| rs11174439  | 12 | 62,748,111  | A | G | 0.8544 | 0.0085  | 0.0015 |
| rs62286094  | 4  | 6,502,170   | T | C | 0.1586 | 0.0082  | 0.0014 |
| rs1158089   | 13 | 47,594,931  | A | C | 0.6658 | 0.0063  | 0.0011 |
| rs34151737  | 4  | 171,037,039 | T | C | 0.9309 | 0.0118  | 0.0021 |
| rs76085107  | 2  | 181,971,068 | A | C | 0.0477 | -0.0140 | 0.0025 |
| rs12538332  | 7  | 127,839,654 | A | C | 0.7239 | 0.0067  | 0.0012 |
| rs4381456   | 13 | 107,684,072 | T | C | 0.6386 | 0.0062  | 0.0011 |
| rs13413752  | 2  | 189,476,055 | A | G | 0.0299 | -0.0176 | 0.0031 |
| rs374459451 | 6  | 35,152,279  | C | G | 0.9697 | 0.0201  | 0.0035 |
| rs55787231  | 11 | 88,142,087  | T | C | 0.2098 | 0.0073  | 0.0013 |
| rs6475368   | 9  | 19,779,939  | T | C | 0.5509 | -0.0060 | 0.0011 |
| rs2903624   | 20 | 41,616,510  | A | G | 0.4824 | -0.0060 | 0.0011 |
| rs2399626   | 15 | 97,502,991  | A | C | 0.3449 | -0.0063 | 0.0011 |
| rs2142840   | 22 | 25,507,595  | C | G | 0.3145 | -0.0064 | 0.0011 |
| rs9496630   | 6  | 143,752,193 | A | T | 0.2892 | -0.0066 | 0.0012 |
| rs1986164   | 12 | 12,746,965  | T | C | 0.5896 | -0.0063 | 0.0011 |
| rs1955190   | 11 | 86,070,355  | A | G | 0.5074 | -0.0060 | 0.0010 |
| rs7777286   | 7  | 88,830,993  | C | G | 0.7065 | 0.0065  | 0.0011 |
| rs76007632  | 7  | 2,174,242   | A | G | 0.0253 | 0.0191  | 0.0034 |
| rs12790564  | 11 | 728,992     | C | G | 0.4221 | 0.0061  | 0.0011 |
| rs4715244   | 6  | 51,676,802  | T | G | 0.222  | 0.0072  | 0.0013 |

|             |    |             |   |   |        |         |        |
|-------------|----|-------------|---|---|--------|---------|--------|
| rs28850959  | 8  | 90,669,018  | A | G | 0.8146 | 0.0077  | 0.0014 |
| rs62180064  | 2  | 199,585,519 | A | G | 0.084  | 0.0109  | 0.0019 |
| rs75144206  | 4  | 2,638,681   | T | C | 0.0749 | -0.0114 | 0.0020 |
| rs7002561   | 8  | 34,882,308  | T | G | 0.0877 | 0.0105  | 0.0019 |
| rs6723810   | 2  | 199,282,283 | A | G | 0.0489 | 0.0140  | 0.0025 |
| rs60841615  | 21 | 27,222,934  | T | G | 0.0959 | 0.0101  | 0.0018 |
| rs145183241 | 9  | 14,244,689  | A | G | 0.9941 | 0.0394  | 0.0069 |
| rs113728980 | 13 | 28,122,785  | T | C | 0.0673 | 0.0119  | 0.0021 |
| rs1390072   | 4  | 67,683,423  | C | G | 0.7034 | 0.0065  | 0.0011 |
| rs1023038   | 1  | 92,509,854  | T | C | 0.2618 | -0.0068 | 0.0012 |
| rs4975219   | 4  | 130,308,675 | T | C | 0.9502 | 0.0137  | 0.0024 |
| rs35553446  | 6  | 56,823,015  | C | G | 0.2151 | 0.0072  | 0.0013 |
| rs987579    | 14 | 71,513,480  | T | C | 0.9026 | 0.0100  | 0.0018 |
| rs6756935   | 2  | 196,514,057 | T | C | 0.137  | -0.0087 | 0.0015 |
| rs802735    | 6  | 128,278,336 | T | C | 0.5512 | 0.0060  | 0.0011 |
| rs2035891   | 8  | 19,634,395  | C | G | 0.406  | 0.0061  | 0.0011 |
| rs11128633  | 3  | 13,135,300  | T | C | 0.4378 | 0.0060  | 0.0011 |
| rs2210174   | 14 | 83,600,010  | T | C | 0.6201 | 0.0061  | 0.0011 |
| rs10279132  | 7  | 70,186,936  | T | G | 0.691  | -0.0064 | 0.0011 |
| rs55883436  | 6  | 30,932,429  | A | G | 0.9754 | 0.0193  | 0.0034 |
| rs78538536  | 1  | 90,860,795  | A | G | 0.0175 | -0.0228 | 0.0040 |
| rs2182918   | 13 | 110,032,857 | T | G | 0.4911 | 0.0059  | 0.0010 |
| rs41482647  | 4  | 147,964,901 | A | G | 0.0541 | 0.0132  | 0.0023 |
| rs71429411  | 13 | 42,811,025  | T | C | 0.1844 | -0.0077 | 0.0014 |
| rs4728096   | 7  | 127,879,348 | T | C | 0.5253 | -0.0060 | 0.0010 |
| rs7723508   | 5  | 117,016,937 | T | C | 0.3085 | 0.0064  | 0.0011 |
| rs10192119  | 2  | 164,581,241 | T | G | 0.8315 | 0.0086  | 0.0015 |
| rs9828648   | 3  | 94,258,938  | A | T | 0.7021 | -0.0065 | 0.0011 |
| rs7147581   | 14 | 101,028,840 | T | C | 0.5848 | 0.0060  | 0.0011 |
| rs118127230 | 10 | 75,480,558  | T | C | 0.0241 | 0.0198  | 0.0035 |
| rs7650118   | 3  | 21,806,293  | T | C | 0.3267 | -0.0063 | 0.0011 |
| rs6910380   | 6  | 108,725,990 | C | G | 0.4374 | 0.0060  | 0.0011 |
| rs62234664  | 3  | 7,908,510   | A | G | 0.2814 | -0.0066 | 0.0012 |
| rs117349657 | 9  | 23,310,514  | A | G | 0.9783 | -0.0208 | 0.0037 |
| rs4373298   | 5  | 167,604,843 | A | C | 0.6308 | 0.0062  | 0.0011 |
| rs67047765  | 5  | 154,008,082 | A | G | 0.0292 | -0.0177 | 0.0031 |
| rs2291228   | 5  | 169,288,732 | A | G | 0.5667 | 0.0060  | 0.0011 |
| rs28391219  | 18 | 38,180,077  | T | C | 0.8459 | 0.0082  | 0.0015 |
| rs113805220 | 6  | 35,566,133  | A | G | 0.026  | -0.0187 | 0.0033 |
| rs146958830 | 14 | 29,386,775  | T | C | 0.8624 | -0.0087 | 0.0015 |
| rs11926588  | 3  | 18,838,880  | T | G | 0.4504 | -0.0060 | 0.0011 |
| rs6755567   | 2  | 2,102,687   | A | G | 0.7541 | 0.0069  | 0.0012 |
| rs17260422  | 18 | 22,536,721  | C | G | 0.9123 | 0.0105  | 0.0019 |
| rs148434124 | 18 | 25,803,635  | A | T | 0.4876 | -0.0059 | 0.0010 |
| rs73340551  | 10 | 105,595,797 | T | C | 0.2653 | 0.0067  | 0.0012 |
| rs75414516  | 10 | 87,150,327  | A | G | 0.0428 | 0.0149  | 0.0026 |
| rs6044055   | 20 | 16,500,093  | T | C | 0.7077 | -0.0065 | 0.0012 |
| rs62083308  | 18 | 50,346,381  | T | C | 0.1745 | -0.0078 | 0.0014 |

|             |    |             |   |   |        |         |        |
|-------------|----|-------------|---|---|--------|---------|--------|
| rs2319504   | 17 | 60,913,945  | A | G | 0.3547 | 0.0062  | 0.0011 |
| rs3097862   | 5  | 155,551,741 | A | G | 0.4054 | -0.0060 | 0.0011 |
| rs946516    | 10 | 80,609,135  | T | C | 0.6528 | 0.0062  | 0.0011 |
| rs2842621   | 6  | 37,114,293  | C | G | 0.3398 | -0.0063 | 0.0011 |
| rs10946469  | 6  | 21,771,687  | A | C | 0.6378 | -0.0062 | 0.0011 |
| rs7999579   | 13 | 113,879,357 | T | C | 0.7706 | -0.0071 | 0.0013 |
| rs11937610  | 4  | 178,538,461 | A | G | 0.6519 | 0.0062  | 0.0011 |
| rs12649053  | 4  | 25,887,116  | T | C | 0.2252 | -0.0071 | 0.0013 |
| rs61768457  | 1  | 58,282,439  | T | C | 0.0251 | -0.0190 | 0.0033 |
| rs9639976   | 7  | 5,347,749   | A | G | 0.2636 | 0.0068  | 0.0012 |
| rs28469453  | 4  | 184,636,782 | C | G | 0.3638 | -0.0062 | 0.0011 |
| rs55797612  | 19 | 46,393,195  | A | G | 0.8193 | 0.0077  | 0.0014 |
| rs2253090   | 11 | 106,892,472 | A | T | 0.7655 | -0.0070 | 0.0012 |
| rs303752    | 18 | 21,074,255  | A | G | 0.4049 | -0.0060 | 0.0011 |
| rs799809    | 2  | 155,197,887 | A | T | 0.7048 | -0.0065 | 0.0011 |
| rs2268983   | 14 | 69,408,697  | A | G | 0.5171 | -0.0059 | 0.0010 |
| rs208626    | 16 | 22,927,887  | A | G | 0.5504 | 0.0060  | 0.0011 |
| rs4270952   | 8  | 60,794,591  | T | C | 0.3702 | 0.0065  | 0.0011 |
| rs12363110  | 11 | 105,550,936 | T | C | 0.3838 | 0.0061  | 0.0011 |
| rs73625120  | 6  | 152,435,643 | A | G | 0.0389 | 0.0153  | 0.0027 |
| rs150016765 | 2  | 215,304,073 | A | G | 0.9854 | -0.0249 | 0.0044 |
| rs557810    | 1  | 110,730,043 | A | G | 0.444  | 0.0060  | 0.0011 |
| rs1156541   | 18 | 39,952,989  | T | C | 0.7711 | 0.0070  | 0.0012 |
| rs2244066   | 6  | 30,118,658  | A | G | 0.1356 | -0.0088 | 0.0016 |
| rs135896    | 22 | 44,778,142  | A | G | 0.7832 | 0.0072  | 0.0013 |
| rs34197935  | 2  | 184,393,185 | T | C | 0.2056 | 0.0073  | 0.0013 |
| rs62236046  | 3  | 20,924,948  | T | C | 0.5422 | -0.0059 | 0.0011 |
| rs28461595  | 17 | 42,683,419  | A | G | 0.2374 | -0.0070 | 0.0012 |
| rs16967965  | 16 | 64,896,780  | T | G | 0.6827 | -0.0064 | 0.0011 |
| rs4130074   | 8  | 143,042,604 | A | C | 0.28   | -0.0066 | 0.0012 |
| rs2846281   | 11 | 118,901,166 | C | G | 0.2164 | 0.0072  | 0.0013 |
| rs4705650   | 5  | 113,584,688 | A | G | 0.1788 | -0.0077 | 0.0014 |
| rs12206040  | 6  | 141,338,767 | T | C | 0.7188 | -0.0071 | 0.0013 |
| rs12632133  | 3  | 131,800,709 | A | G | 0.0742 | 0.0113  | 0.0020 |
| rs712012    | 3  | 195,964,687 | T | C | 0.623  | -0.0061 | 0.0011 |
| rs11932176  | 4  | 17,279,482  | T | G | 0.4173 | 0.0061  | 0.0011 |
| rs62095778  | 18 | 31,695,741  | T | C | 0.7623 | 0.0069  | 0.0012 |
| rs76506182  | 2  | 155,856,120 | A | G | 0.051  | 0.0135  | 0.0024 |
| rs1868502   | 3  | 54,427,242  | T | C | 0.2114 | 0.0072  | 0.0013 |
| rs10889961  | 1  | 41,855,174  | A | G | 0.6881 | 0.0064  | 0.0011 |
| rs7922955   | 10 | 104,990,877 | A | G | 0.9683 | 0.0170  | 0.0030 |
| rs111660908 | 15 | 35,826,369  | A | G | 0.1446 | 0.0084  | 0.0015 |
| rs1291860   | 10 | 11,111,443  | T | C | 0.9118 | 0.0105  | 0.0019 |
| rs11155288  | 6  | 143,604,645 | A | G | 0.6268 | -0.0061 | 0.0011 |
| rs7653274   | 3  | 131,964,644 | T | C | 0.1949 | -0.0075 | 0.0013 |
| rs13255037  | 8  | 17,911,046  | T | C | 0.4895 | 0.0059  | 0.0010 |
| rs210608    | 6  | 117,831,317 | T | C | 0.4419 | 0.0060  | 0.0011 |
| rs12908446  | 15 | 62,822,105  | T | C | 0.79   | 0.0073  | 0.0013 |



|             |    |               |   |        |         |        |
|-------------|----|---------------|---|--------|---------|--------|
| rs17055673  | 8  | 26,524,421 T  | C | 0.1378 | -0.0086 | 0.0015 |
| rs1865880   | 3  | 161,515,597 T | C | 0.3621 | -0.0062 | 0.0011 |
| rs7148554   | 14 | 23,785,951 T  | C | 0.22   | -0.0071 | 0.0013 |
| rs72685765  | 14 | 78,696,742 T  | C | 0.9417 | -0.0126 | 0.0022 |
| rs9844381   | 3  | 32,878,311 A  | G | 0.8138 | 0.0076  | 0.0013 |
| rs72777309  | 10 | 9,949,401 A   | C | 0.3594 | 0.0062  | 0.0011 |
| rs4899095   | 14 | 63,304,255 T  | C | 0.8937 | -0.0096 | 0.0017 |
| rs35533335  | 1  | 32,280,369 A  | G | 0.0157 | -0.0242 | 0.0043 |
| rs10815863  | 9  | 8,418,224 T   | C | 0.1302 | -0.0101 | 0.0018 |
| rs976518    | 7  | 21,581,723 A  | G | 0.446  | 0.0059  | 0.0011 |
| rs4667878   | 2  | 167,015,812 A | T | 0.1874 | 0.0076  | 0.0013 |
| rs2050846   | 1  | 52,301,295 T  | C | 0.3387 | -0.0063 | 0.0011 |
| rs11635330  | 15 | 78,687,353 T  | C | 0.385  | -0.0061 | 0.0011 |
| rs62151048  | 2  | 61,423,515 A  | G | 0.0093 | 0.0316  | 0.0056 |
| rs12816214  | 12 | 24,866,863 A  | G | 0.0404 | -0.0150 | 0.0027 |
| rs2208030   | 20 | 3,355,567 T   | C | 0.4824 | 0.0059  | 0.0010 |
| rs13104877  | 4  | 116,007,803 A | G | 0.4884 | 0.0059  | 0.0011 |
| rs62078384  | 17 | 47,044,463 T  | C | 0.5212 | -0.0059 | 0.0010 |
| rs3759344   | 12 | 6,862,646 A   | G | 0.1002 | -0.0098 | 0.0017 |
| rs1285993   | 14 | 91,519,196 A  | G | 0.309  | 0.0070  | 0.0012 |
| rs61194013  | 4  | 65,583,366 T  | C | 0.0731 | 0.0114  | 0.0020 |
| rs6425308   | 1  | 174,941,650 T | G | 0.0762 | -0.0112 | 0.0020 |
| rs4795938   | 17 | 32,908,064 T  | C | 0.1483 | 0.0083  | 0.0015 |
| rs113329815 | 8  | 19,304,259 A  | G | 0.1748 | 0.0078  | 0.0014 |
| rs2446077   | 3  | 103,577,723 A | T | 0.2634 | 0.0067  | 0.0012 |
| rs11043299  | 12 | 122,483,139 T | C | 0.3723 | -0.0063 | 0.0011 |
| rs139241468 | 9  | 14,446,310 A  | G | 0.9771 | 0.0198  | 0.0035 |
| rs2731034   | 12 | 45,422,236 A  | G | 0.5959 | 0.0060  | 0.0011 |
| rs115330285 | 2  | 174,955,014 A | G | 0.2011 | 0.0074  | 0.0013 |
| rs2552505   | 18 | 38,738,888 T  | C | 0.6513 | 0.0062  | 0.0011 |
| rs826217    | 3  | 24,269,789 T  | C | 0.6165 | -0.0061 | 0.0011 |
| rs1029278   | 11 | 123,421,402 A | G | 0.333  | 0.0063  | 0.0011 |
| rs79067665  | 2  | 61,216,277 T  | C | 0.0255 | -0.0190 | 0.0034 |
| rs10867245  | 9  | 81,351,608 C  | G | 0.546  | 0.0059  | 0.0011 |
| rs4788115   | 16 | 28,998,111 A  | T | 0.1751 | 0.0078  | 0.0014 |
| rs10867226  | 9  | 81,232,453 T  | C | 0.2594 | 0.0067  | 0.0012 |
| rs12200809  | 6  | 143,971,584 A | G | 0.2885 | 0.0065  | 0.0012 |
| rs820008    | 2  | 174,123,399 A | G | 0.2549 | -0.0068 | 0.0012 |
| rs1365355   | 7  | 135,978,595 A | G | 0.5847 | -0.0060 | 0.0011 |
| rs11191355  | 10 | 104,392,497 T | C | 0.8436 | 0.0081  | 0.0014 |
| rs886765    | 7  | 40,683,852 T  | C | 0.0824 | -0.0108 | 0.0019 |
| rs116173575 | 1  | 181,801,435 T | C | 0.0331 | -0.0165 | 0.0029 |
| rs9789718   | 2  | 221,361,301 A | C | 0.6006 | 0.0060  | 0.0011 |
| rs137926116 | 3  | 17,132,561 T  | C | 0.0184 | -0.0221 | 0.0039 |
| rs77248137  | 6  | 153,447,836 A | T | 0.2006 | 0.0074  | 0.0013 |
| rs58836328  | 8  | 117,687,616 A | T | 0.0953 | 0.0100  | 0.0018 |
| rs645628    | 13 | 98,962,246 A  | G | 0.7712 | 0.0070  | 0.0012 |
| rs541969    | 11 | 126,459,999 T | C | 0.5114 | -0.0059 | 0.0010 |

|             |    |             |   |   |        |         |        |
|-------------|----|-------------|---|---|--------|---------|--------|
| rs529020    | 18 | 8,688,694   | T | C | 0.3172 | -0.0064 | 0.0011 |
| rs146851424 | 13 | 50,377,910  | A | C | 0.9774 | -0.0199 | 0.0035 |
| rs1435495   | 4  | 182,393,462 | T | C | 0.2507 | -0.0068 | 0.0012 |
| rs216232    | 12 | 286,331     | A | G | 0.6834 | 0.0064  | 0.0011 |
| rs2216598   | 5  | 106,561,136 | A | G | 0.4554 | 0.0059  | 0.0011 |
| rs73106136  | 20 | 43,491,477  | T | G | 0.0851 | -0.0106 | 0.0019 |
| rs12469557  | 2  | 13,653,562  | T | C | 0.6008 | -0.0061 | 0.0011 |
| rs7961224   | 12 | 15,322,668  | T | C | 0.8805 | -0.0091 | 0.0016 |
| rs7578633   | 2  | 113,978,650 | T | C | 0.3636 | 0.0061  | 0.0011 |
| rs35482904  | 3  | 20,032,425  | A | G | 0.4152 | 0.0060  | 0.0011 |
| rs117526918 | 14 | 73,899,307  | T | C | 0.0742 | 0.0113  | 0.0020 |
| rs8122401   | 20 | 49,709,389  | T | C | 0.6517 | -0.0062 | 0.0011 |
| rs288604    | 16 | 62,672,612  | A | G | 0.8667 | 0.0087  | 0.0015 |
| rs56162539  | 12 | 58,492,858  | T | C | 0.128  | 0.0089  | 0.0016 |
| rs940052    | 2  | 45,981,142  | A | G | 0.4437 | 0.0060  | 0.0011 |
| rs1547173   | 10 | 95,427,281  | A | G | 0.4798 | -0.0059 | 0.0010 |
| rs115819330 | 1  | 44,132,074  | A | G | 0.0462 | -0.0140 | 0.0025 |
| rs76370969  | 5  | 94,024,235  | C | G | 0.0125 | 0.0267  | 0.0048 |
| rs3811640   | 2  | 112,776,979 | A | C | 0.2744 | 0.0066  | 0.0012 |
| rs115940732 | 2  | 7,421,705   | T | C | 0.0172 | 0.0227  | 0.0040 |
| rs55802376  | 10 | 102,961,734 | A | G | 0.1547 | 0.0082  | 0.0014 |
| rs7556065   | 1  | 34,988,276  | A | T | 0.5129 | 0.0059  | 0.0010 |
| rs13037516  | 20 | 55,469,661  | T | C | 0.4984 | 0.0059  | 0.0010 |
| rs4635115   | 11 | 110,947,076 | T | C | 0.1742 | -0.0078 | 0.0014 |
| rs722256    | 16 | 6,760,721   | C | G | 0.7185 | 0.0065  | 0.0012 |
| rs2468943   | 12 | 48,747,249  | T | G | 0.65   | -0.0062 | 0.0011 |
| rs4556782   | 16 | 54,315,752  | T | C | 0.3507 | -0.0062 | 0.0011 |
| rs3922612   | 15 | 27,682,851  | T | C | 0.0937 | 0.0101  | 0.0018 |
| rs62506068  | 8  | 30,861,192  | T | C | 0.0278 | -0.0182 | 0.0032 |
| rs566707    | 17 | 74,845,023  | A | G | 0.0875 | -0.0105 | 0.0019 |
| rs1463555   | 4  | 164,049,448 | A | T | 0.8099 | -0.0075 | 0.0013 |
| rs10186870  | 2  | 6,712,550   | T | G | 0.6013 | -0.0060 | 0.0011 |
| rs16864081  | 2  | 5,870,941   | T | C | 0.2375 | 0.0069  | 0.0012 |
| rs3110127   | 8  | 60,130,296  | T | C | 0.3315 | -0.0062 | 0.0011 |
| rs1536043   | 6  | 33,592,881  | A | C | 0.0412 | -0.0148 | 0.0026 |
| rs62381625  | 5  | 170,773,011 | T | C | 0.163  | 0.0080  | 0.0014 |
| rs56408129  | 18 | 39,016,483  | A | T | 0.7836 | -0.0083 | 0.0015 |
| rs1860735   | 7  | 151,354,400 | T | C | 0.1098 | -0.0094 | 0.0017 |
| rs4904871   | 14 | 92,795,912  | A | G | 0.4502 | -0.0059 | 0.0011 |
| rs4073785   | 7  | 1,714,448   | C | G | 0.3383 | 0.0062  | 0.0011 |
| rs2702565   | 4  | 15,078,484  | T | C | 0.6129 | 0.0060  | 0.0011 |
| rs9981747   | 21 | 42,612,426  | A | G | 0.1574 | 0.0081  | 0.0014 |
| rs12655342  | 5  | 96,229,542  | T | G | 0.8523 | -0.0083 | 0.0015 |
| rs17640869  | 18 | 36,099,500  | A | G | 0.4553 | 0.0059  | 0.0011 |
| rs17292106  | 9  | 14,792,121  | A | C | 0.8794 | -0.0090 | 0.0016 |
| rs79587027  | 1  | 57,895,755  | A | T | 0.9377 | 0.0122  | 0.0022 |
| rs12821447  | 12 | 12,891,227  | T | C | 0.0902 | 0.0103  | 0.0018 |
| rs35759537  | 14 | 23,749,037  | T | C | 0.187  | 0.0076  | 0.0013 |

|             |    |             |   |   |        |         |        |
|-------------|----|-------------|---|---|--------|---------|--------|
| rs79303419  | 2  | 200,246,743 | T | C | 0.9458 | -0.0131 | 0.0023 |
| rs73027374  | 3  | 20,416,003  | A | G | 0.0885 | 0.0104  | 0.0019 |
| rs62392801  | 5  | 178,062,267 | T | C | 0.6494 | -0.0062 | 0.0011 |
| rs12158831  | 22 | 46,450,616  | T | G | 0.0255 | 0.0189  | 0.0034 |
| rs1483814   | 8  | 77,807,279  | T | G | 0.2    | 0.0073  | 0.0013 |
| rs116670538 | 3  | 83,811,694  | T | C | 0.0773 | 0.0110  | 0.0020 |
| rs648044    | 11 | 114,030,799 | A | G | 0.3825 | 0.0061  | 0.0011 |
| rs60041956  | 19 | 2,684,281   | T | C | 0.6623 | -0.0062 | 0.0011 |
| rs66743759  | 17 | 75,884,545  | T | G | 0.8286 | 0.0078  | 0.0014 |
| rs62573993  | 9  | 96,385,086  | C | G | 0.5092 | -0.0059 | 0.0010 |
| rs6877245   | 5  | 120,368,710 | A | G | 0.6653 | 0.0062  | 0.0011 |
| rs143754669 | 13 | 58,318,099  | T | C | 0.9865 | 0.0262  | 0.0047 |
| rs79397771  | 4  | 11,338,903  | T | C | 0.8081 | 0.0075  | 0.0013 |
| rs1320654   | 11 | 115,788,427 | A | C | 0.395  | 0.0060  | 0.0011 |
| rs11895312  | 2  | 159,198,688 | T | C | 0.0592 | -0.0124 | 0.0022 |
| rs117714272 | 20 | 18,117,964  | A | G | 0.09   | -0.0103 | 0.0018 |
| rs3012052   | 10 | 77,240,627  | T | C | 0.1227 | -0.0089 | 0.0016 |
| rs6008628   | 22 | 48,717,101  | A | C | 0.7795 | -0.0071 | 0.0013 |
| rs17697570  | 4  | 2,788,671   | T | G | 0.0142 | -0.0255 | 0.0046 |
| rs143252786 | 17 | 78,891,364  | A | G | 0.0195 | 0.0216  | 0.0039 |
| rs280898    | 1  | 75,504,024  | C | G | 0.7303 | -0.0066 | 0.0012 |
| rs114800204 | 2  | 107,465,526 | A | G | 0.0543 | -0.0130 | 0.0023 |
| rs2738782   | 20 | 62,308,570  | A | G | 0.3888 | 0.0061  | 0.0011 |
| rs13403620  | 2  | 52,249,997  | T | G | 0.5147 | 0.0059  | 0.0010 |
| rs2432524   | 16 | 71,584,333  | T | G | 0.6424 | -0.0061 | 0.0011 |
| rs1165921   | 3  | 103,769,828 | A | T | 0.6478 | 0.0062  | 0.0011 |
| rs11252031  | 10 | 3,731,269   | A | G | 0.3066 | -0.0064 | 0.0011 |
| rs3134101   | 8  | 110,091,044 | T | C | 0.4036 | -0.0060 | 0.0011 |
| rs294599    | 5  | 162,991,665 | T | C | 0.8726 | -0.0088 | 0.0016 |
| rs10787447  | 10 | 114,181,094 | A | G | 0.5034 | 0.0059  | 0.0010 |
| rs4306690   | 2  | 5,815,111   | T | C | 0.5689 | -0.0059 | 0.0011 |
| rs11921658  | 3  | 114,183,612 | T | C | 0.8065 | -0.0074 | 0.0013 |
| rs55866250  | 1  | 153,643,966 | A | C | 0.0204 | -0.0219 | 0.0039 |
| rs143773936 | 9  | 23,204,293  | T | C | 0.9825 | -0.0225 | 0.0040 |
| rs17518213  | 5  | 133,793,417 | A | G | 0.0587 | 0.0125  | 0.0022 |
| rs9567552   | 13 | 32,890,227  | T | G | 0.2516 | -0.0068 | 0.0012 |
| rs193234479 | 15 | 65,004,884  | C | G | 0.9987 | -0.0855 | 0.0153 |
| rs9291546   | 4  | 30,718,333  | A | G | 0.8495 | -0.0082 | 0.0015 |
| rs117430256 | 10 | 106,328,880 | T | G | 0.9807 | -0.0220 | 0.0039 |
| rs12517393  | 5  | 113,881,183 | T | G | 0.8232 | 0.0077  | 0.0014 |
| rs3731930   | 2  | 96,966,661  | C | G | 0.3505 | 0.0061  | 0.0011 |
| rs17664431  | 7  | 14,587,278  | T | C | 0.9444 | 0.0129  | 0.0023 |
| rs140980867 | 5  | 91,437,139  | A | G | 0.9839 | -0.0235 | 0.0042 |
| rs112714914 | 15 | 51,691,279  | A | G | 0.9671 | -0.0164 | 0.0029 |
| rs13422459  | 2  | 173,093,533 | T | C | 0.2386 | -0.0069 | 0.0012 |
| rs148512052 | 3  | 155,505,327 | A | G | 0.034  | -0.0162 | 0.0029 |
| rs12996631  | 2  | 29,572,299  | A | G | 0.6043 | -0.0060 | 0.0011 |
| rs12457278  | 18 | 5,893,149   | T | C | 0.4809 | -0.0059 | 0.0011 |

|             |    |               |   |        |         |        |
|-------------|----|---------------|---|--------|---------|--------|
| rs17505611  | 2  | 50,375,871 A  | G | 0.8645 | -0.0086 | 0.0015 |
| rs7564938   | 2  | 225,614,954 A | T | 0.516  | 0.0059  | 0.0010 |
| rs4812818   | 20 | 42,939,426 T  | G | 0.1947 | -0.0074 | 0.0013 |
| rs12431579  | 14 | 36,594,397 A  | G | 0.6389 | -0.0061 | 0.0011 |
| rs10276706  | 7  | 71,425,392 A  | G | 0.538  | -0.0059 | 0.0011 |
| rs11692364  | 2  | 142,809,287 A | G | 0.4843 | -0.0059 | 0.0010 |
| rs6534591   | 4  | 127,825,185 A | G | 0.3614 | -0.0061 | 0.0011 |
| rs306757    | 20 | 3,119,133 A   | G | 0.3604 | 0.0061  | 0.0011 |
| rs7338804   | 13 | 38,660,394 A  | G | 0.1412 | -0.0084 | 0.0015 |
| rs1709065   | 6  | 157,136,631 A | G | 0.5276 | -0.0059 | 0.0011 |
| rs151144406 | 12 | 133,741,285 T | C | 0.9716 | -0.0182 | 0.0033 |
| rs57718472  | 18 | 52,628,757 A  | T | 0.7607 | 0.0069  | 0.0012 |
| rs381356    | 7  | 133,862,118 A | G | 0.6056 | 0.0060  | 0.0011 |
| rs17486525  | 5  | 88,112,542 T  | C | 0.9496 | 0.0136  | 0.0024 |
| rs2469226   | 15 | 77,246,990 A  | T | 0.221  | 0.0070  | 0.0013 |
| rs116193437 | 10 | 53,527,105 A  | C | 0.0258 | 0.0190  | 0.0034 |
| rs358644    | 5  | 143,906,230 A | G | 0.5395 | 0.0059  | 0.0010 |
| rs117196567 | 21 | 20,064,273 A  | G | 0.0441 | -0.0142 | 0.0025 |
| rs4479899   | 6  | 78,617,630 T  | G | 0.7606 | -0.0068 | 0.0012 |
| rs13030077  | 2  | 80,092,723 T  | G | 0.1787 | 0.0076  | 0.0014 |
| rs11056726  | 12 | 16,082,586 A  | T | 0.2337 | -0.0069 | 0.0012 |
| rs16844724  | 2  | 160,918,368 A | G | 0.0687 | 0.0115  | 0.0021 |
| rs4934173   | 10 | 88,020,583 A  | G | 0.1962 | -0.0074 | 0.0013 |
| rs79299044  | 2  | 162,494,182 A | T | 0.2117 | -0.0072 | 0.0013 |
| rs1592507   | 12 | 97,785,123 T  | C | 0.1106 | 0.0093  | 0.0017 |
| rs10415488  | 19 | 5,246,717 T   | C | 0.6119 | -0.0060 | 0.0011 |
| rs116178502 | 2  | 62,524,523 A  | G | 0.0064 | 0.0382  | 0.0068 |
| rs2456680   | 10 | 68,255,097 A  | G | 0.5135 | 0.0058  | 0.0010 |
| rs62534173  | 9  | 1,861,094 T   | C | 0.0617 | 0.0125  | 0.0022 |
| rs141896644 | 2  | 25,518,058 A  | G | 0.0379 | 0.0155  | 0.0028 |
| rs62171204  | 2  | 155,100,956 A | G | 0.9719 | 0.0177  | 0.0032 |
| rs350911    | 19 | 4,099,187 T   | C | 0.2809 | 0.0065  | 0.0012 |
| rs72981935  | 11 | 105,834,838 A | T | 0.9259 | -0.0111 | 0.0020 |
| rs10793886  | 9  | 134,402,210 T | C | 0.8553 | 0.0083  | 0.0015 |
| rs523386    | 18 | 77,527,195 A  | G | 0.8106 | 0.0075  | 0.0013 |
| rs2098526   | 2  | 162,845,276 A | G | 0.0295 | -0.0172 | 0.0031 |
| rs28695882  | 22 | 49,232,869 A  | G | 0.5553 | 0.0059  | 0.0011 |
| rs2520509   | 12 | 91,006,514 A  | G | 0.3345 | 0.0062  | 0.0011 |
| rs7682230   | 4  | 67,912,848 A  | C | 0.3637 | -0.0061 | 0.0011 |
| rs17577073  | 11 | 99,152,801 A  | C | 0.5627 | 0.0059  | 0.0011 |
| rs7986948   | 13 | 46,258,541 T  | G | 0.1261 | 0.0088  | 0.0016 |
| rs79157526  | 1  | 97,882,937 T  | C | 0.9865 | 0.0255  | 0.0046 |
| rs13120568  | 4  | 23,737,797 A  | G | 0.6952 | 0.0063  | 0.0011 |
| rs41322948  | 2  | 205,355,529 A | G | 0.357  | 0.0061  | 0.0011 |
| rs62180506  | 2  | 217,662,788 A | G | 0.8855 | 0.0092  | 0.0016 |
| rs35069703  | 16 | 68,789,445 A  | G | 0.2826 | 0.0065  | 0.0012 |
| rs74323354  | 21 | 47,843,163 A  | G | 0.9268 | 0.0112  | 0.0020 |
| rs1974708   | 16 | 55,793,837 T  | C | 0.1829 | -0.0075 | 0.0014 |

|             |    |             |   |   |        |         |        |
|-------------|----|-------------|---|---|--------|---------|--------|
| rs276105    | 3  | 81,433,234  | T | G | 0.4558 | 0.0059  | 0.0011 |
| rs143084201 | 1  | 110,755,075 | A | G | 0.0157 | -0.0240 | 0.0043 |
| rs7312511   | 12 | 13,582,753  | T | C | 0.0986 | -0.0098 | 0.0018 |
| rs1341784   | 1  | 70,007,663  | T | C | 0.7129 | -0.0064 | 0.0012 |
| rs28687     | 2  | 59,946,868  | T | C | 0.8076 | 0.0074  | 0.0013 |
| rs4677087   | 3  | 72,158,443  | A | G | 0.6377 | -0.0061 | 0.0011 |
| rs34659950  | 3  | 166,052,795 | T | C | 0.1485 | 0.0083  | 0.0015 |
| rs9446446   | 6  | 72,408,163  | A | G | 0.5054 | -0.0058 | 0.0010 |
| rs34691764  | 1  | 72,641,334  | T | G | 0.9924 | -0.0348 | 0.0063 |
| rs143141266 | 4  | 149,594,840 | T | C | 0.0453 | -0.0141 | 0.0025 |
| rs13122350  | 4  | 18,311,265  | A | G | 0.412  | -0.0059 | 0.0011 |
| rs73059315  | 19 | 47,483,105  | A | G | 0.7238 | -0.0065 | 0.0012 |
| rs6133787   | 20 | 10,044,282  | T | C | 0.8426 | -0.0080 | 0.0014 |
| rs9888376   | 12 | 77,644,553  | T | C | 0.5713 | -0.0059 | 0.0011 |
| rs11644588  | 16 | 82,830,121  | A | C | 0.6482 | -0.0061 | 0.0011 |
| rs633051    | 1  | 96,060,707  | A | G | 0.2453 | -0.0068 | 0.0012 |
| rs13289150  | 9  | 86,164,428  | A | G | 0.6185 | -0.0060 | 0.0011 |
| rs11820132  | 11 | 43,603,300  | T | C | 0.568  | -0.0059 | 0.0011 |
| rs1334205   | 13 | 82,455,294  | A | C | 0.3324 | 0.0062  | 0.0011 |
| rs35878043  | 7  | 100,848,223 | T | G | 0.1431 | -0.0083 | 0.0015 |
| rs9429225   | 1  | 44,486,239  | T | C | 0.8502 | 0.0082  | 0.0015 |
| rs11190872  | 10 | 102,996,362 | T | C | 0.2302 | -0.0069 | 0.0012 |
| rs2078357   | 16 | 5,672,875   | C | G | 0.8852 | -0.0092 | 0.0016 |
| rs13063991  | 3  | 141,293,755 | T | C | 0.9256 | -0.0112 | 0.0020 |
| rs7778411   | 7  | 48,626,645  | C | G | 0.3502 | 0.0061  | 0.0011 |
| rs11108920  | 12 | 97,639,811  | A | G | 0.9303 | -0.0114 | 0.0021 |
| rs56026882  | 5  | 72,401,140  | A | G | 0.1656 | 0.0078  | 0.0014 |
| rs1008540   | 7  | 32,249,622  | T | C | 0.8486 | 0.0081  | 0.0015 |
| rs7095475   | 10 | 106,207,933 | T | C | 0.8362 | -0.0079 | 0.0014 |
| rs17236381  | 5  | 66,800,946  | A | C | 0.1368 | 0.0085  | 0.0015 |
| rs35938849  | 1  | 44,148,078  | A | G | 0.0468 | -0.0138 | 0.0025 |
| rs1850634   | 2  | 198,827,896 | T | C | 0.8057 | -0.0073 | 0.0013 |
| rs10811874  | 9  | 23,219,435  | A | G | 0.4387 | -0.0059 | 0.0011 |
| rs140518050 | 7  | 127,035,310 | A | G | 0.9915 | -0.0329 | 0.0059 |
| rs7676220   | 4  | 28,358,285  | T | C | 0.2859 | 0.0064  | 0.0012 |
| rs11199316  | 10 | 85,343,296  | T | C | 0.2527 | -0.0067 | 0.0012 |
| rs11996703  | 8  | 1,009,093   | T | C | 0.6475 | 0.0061  | 0.0011 |
| rs1479119   | 12 | 13,505,496  | A | G | 0.438  | -0.0059 | 0.0011 |
| rs9658610   | 12 | 53,493,363  | T | C | 0.0162 | -0.0232 | 0.0042 |
| rs13214394  | 6  | 102,883,639 | A | T | 0.7532 | -0.0067 | 0.0012 |
| rs2514455   | 11 | 114,790,114 | T | C | 0.342  | 0.0061  | 0.0011 |
| rs113715924 | 6  | 72,719,682  | A | G | 0.0348 | 0.0159  | 0.0029 |
| rs1969600   | 21 | 16,414,774  | A | G | 0.2309 | 0.0069  | 0.0012 |
| rs78370568  | 1  | 91,589,662  | A | C | 0.0158 | -0.0240 | 0.0043 |
| rs117829446 | 16 | 30,632,657  | T | C | 0.8857 | 0.0092  | 0.0017 |
| rs2289769   | 12 | 46,600,494  | A | G | 0.8604 | -0.0084 | 0.0015 |
| rs8062736   | 16 | 17,819,544  | A | G | 0.8308 | 0.0078  | 0.0014 |
| rs12466690  | 2  | 73,463,423  | T | G | 0.9229 | 0.0109  | 0.0020 |

|             |    |             |   |   |        |         |        |
|-------------|----|-------------|---|---|--------|---------|--------|
| rs2706762   | 2  | 70,488,470  | T | C | 0.1478 | 0.0082  | 0.0015 |
| rs7933521   | 11 | 13,303,929  | T | C | 0.8553 | 0.0083  | 0.0015 |
| rs10891540  | 11 | 113,239,082 | A | G | 0.5329 | 0.0058  | 0.0010 |
| rs12896898  | 14 | 74,804,634  | C | G | 0.6622 | 0.0062  | 0.0011 |
| rs10123201  | 9  | 29,294,436  | T | G | 0.7395 | 0.0066  | 0.0012 |
| rs75364438  | 8  | 93,271,795  | A | C | 0.8283 | 0.0077  | 0.0014 |
| rs10173182  | 2  | 115,203,750 | A | G | 0.3439 | -0.0061 | 0.0011 |
| rs199778671 | 4  | 15,489,414  | A | T | 0.6448 | 0.0070  | 0.0013 |
| rs16893451  | 5  | 24,501,278  | A | T | 0.1873 | -0.0075 | 0.0013 |
| rs5997412   | 22 | 29,276,747  | A | G | 0.3003 | -0.0063 | 0.0011 |
| rs2402019   | 7  | 115,598,764 | T | G | 0.8887 | 0.0093  | 0.0017 |
| rs706890    | 6  | 112,038,003 | T | C | 0.9534 | 0.0151  | 0.0027 |
| rs1939583   | 11 | 93,349,640  | T | G | 0.426  | -0.0059 | 0.0011 |
| rs77597368  | 11 | 133,817,890 | A | G | 0.0186 | -0.0220 | 0.0040 |
| rs2428373   | 17 | 18,911,386  | T | C | 0.1466 | -0.0083 | 0.0015 |
| rs7557745   | 2  | 107,531,452 | T | C | 0.0679 | -0.0115 | 0.0021 |
| rs6863786   | 5  | 63,055,505  | A | T | 0.4426 | -0.0059 | 0.0011 |
| rs141468874 | 10 | 106,842,553 | A | G | 0.9387 | 0.0121  | 0.0022 |
| rs67338857  | 5  | 106,146,863 | A | G | 0.312  | 0.0063  | 0.0011 |
| rs3115891   | 8  | 101,762,218 | T | C | 0.1455 | -0.0082 | 0.0015 |
| rs73152829  | 12 | 84,222,868  | A | T | 0.7115 | 0.0064  | 0.0012 |
| rs57123286  | 5  | 156,757,381 | A | G | 0.8396 | 0.0079  | 0.0014 |
| rs10208819  | 2  | 178,050,871 | T | C | 0.1082 | -0.0093 | 0.0017 |
| rs17184889  | 2  | 156,918,668 | T | C | 0.8847 | 0.0091  | 0.0016 |
| rs34961029  | 16 | 83,206,551  | T | G | 0.262  | -0.0066 | 0.0012 |
| rs6867541   | 5  | 57,369,279  | A | G | 0.2129 | -0.0071 | 0.0013 |
| rs35032493  | 5  | 67,470,516  | A | G | 0.2393 | 0.0068  | 0.0012 |
| rs729702    | 10 | 122,670,131 | A | G | 0.4127 | -0.0059 | 0.0011 |
| rs34454379  | 4  | 28,851,598  | T | G | 0.3218 | -0.0062 | 0.0011 |
| rs11564713  | 11 | 2,191,709   | T | C | 0.3693 | -0.0060 | 0.0011 |
| rs10182982  | 2  | 242,403,921 | A | T | 0.4438 | -0.0058 | 0.0011 |
| rs34353826  | 16 | 75,116,628  | A | T | 0.1726 | 0.0077  | 0.0014 |
| rs1810649   | 10 | 4,238,934   | T | C | 0.2759 | -0.0065 | 0.0012 |
| rs443440    | 8  | 88,484,377  | A | G | 0.5114 | -0.0058 | 0.0010 |
| rs67691350  | 3  | 58,567,593  | T | C | 0.7854 | 0.0071  | 0.0013 |
| rs116750901 | 1  | 151,574,295 | A | G | 0.0518 | 0.0131  | 0.0024 |
| rs7851327   | 9  | 14,504,757  | T | C | 0.845  | 0.0080  | 0.0014 |
| rs11934532  | 4  | 182,164,089 | A | G | 0.7358 | -0.0066 | 0.0012 |
| rs76167048  | 9  | 22,805,317  | A | T | 0.0875 | 0.0103  | 0.0019 |
| rs1562706   | 2  | 142,782,362 | C | G | 0.5031 | -0.0058 | 0.0010 |
| rs77980141  | 6  | 16,433,942  | C | G | 0.9882 | -0.0270 | 0.0049 |
| rs118004210 | 15 | 47,678,873  | A | G | 0.0271 | 0.0178  | 0.0032 |
| rs9492436   | 6  | 130,334,034 | T | C | 0.1027 | -0.0095 | 0.0017 |
| rs142636592 | 19 | 1,950,373   | T | C | 0.0125 | 0.0266  | 0.0048 |
| rs10122669  | 9  | 116,555,771 | A | G | 0.4151 | -0.0059 | 0.0011 |
| rs4375600   | 15 | 61,597,124  | A | G | 0.0922 | -0.0100 | 0.0018 |
| rs78405460  | 14 | 27,223,614  | A | G | 0.9    | -0.0097 | 0.0017 |
| rs72834698  | 6  | 26,176,517  | A | G | 0.1422 | 0.0165  | 0.0030 |

|             |    |             |   |   |        |         |        |
|-------------|----|-------------|---|---|--------|---------|--------|
| rs11213482  | 11 | 110,435,636 | A | G | 0.8405 | -0.0079 | 0.0014 |
| rs12134665  | 1  | 159,388,286 | T | G | 0.7411 | -0.0066 | 0.0012 |
| rs113487918 | 2  | 211,210,619 | T | C | 0.1341 | -0.0086 | 0.0015 |
| rs527908    | 7  | 71,690,470  | T | C | 0.0467 | 0.0138  | 0.0025 |
| rs7027019   | 9  | 84,191,267  | T | C | 0.6769 | -0.0062 | 0.0011 |
| rs9972455   | 15 | 73,688,686  | A | G | 0.3994 | 0.0059  | 0.0011 |
| rs174434    | 1  | 241,047,690 | T | C | 0.5142 | -0.0058 | 0.0010 |
| rs9388304   | 6  | 124,468,820 | A | G | 0.6289 | 0.0060  | 0.0011 |
| rs7328289   | 13 | 86,937,896  | T | C | 0.7837 | -0.0070 | 0.0013 |
| rs7556635   | 1  | 177,525,993 | T | C | 0.3216 | -0.0062 | 0.0011 |
| rs7452072   | 6  | 88,690,664  | T | C | 0.8855 | 0.0091  | 0.0016 |
| rs10887592  | 10 | 88,143,472  | A | G | 0.2682 | 0.0065  | 0.0012 |
| rs8120559   | 20 | 33,880,546  | A | G | 0.2188 | 0.0070  | 0.0013 |
| rs17138794  | 7  | 18,262,273  | A | T | 0.7673 | -0.0068 | 0.0012 |
| rs2998055   | 10 | 32,469,487  | A | G | 0.3971 | 0.0059  | 0.0011 |
| rs7439403   | 4  | 161,730,998 | C | G | 0.7477 | -0.0067 | 0.0012 |
| rs9540920   | 13 | 67,384,556  | A | G | 0.5713 | 0.0058  | 0.0011 |
| rs11870612  | 17 | 81,012,604  | A | G | 0.1024 | -0.0096 | 0.0017 |
| rs3824992   | 11 | 133,786,590 | A | G | 0.4027 | -0.0059 | 0.0011 |
| rs117503301 | 7  | 5,589,225   | C | G | 0.9344 | 0.0118  | 0.0021 |
| rs144131356 | 4  | 3,012,244   | A | G | 0.0436 | 0.0143  | 0.0026 |
| rs7543481   | 1  | 204,930,143 | T | C | 0.3388 | -0.0061 | 0.0011 |
| rs17666879  | 17 | 33,069,820  | A | T | 0.2204 | -0.0070 | 0.0013 |
| rs4078331   | 16 | 65,169,213  | A | T | 0.7101 | -0.0064 | 0.0012 |
| rs964039    | 11 | 94,774,311  | T | C | 0.7203 | 0.0065  | 0.0012 |
| rs144354885 | 12 | 123,688,283 | A | T | 0.0246 | 0.0191  | 0.0035 |
| rs1511473   | 6  | 23,882,953  | C | G | 0.191  | 0.0073  | 0.0013 |
| rs75756477  | 10 | 98,393,339  | T | C | 0.9557 | 0.0141  | 0.0025 |
| rs9563130   | 13 | 53,601,969  | A | T | 0.6222 | -0.0060 | 0.0011 |
| rs9993133   | 4  | 149,016,541 | T | C | 0.8258 | 0.0076  | 0.0014 |
| rs199011    | 6  | 23,461,894  | A | C | 0.2801 | 0.0064  | 0.0012 |
| rs560542855 | 16 | 66,580,607  | A | G | 0.9967 | 0.0532  | 0.0097 |
| rs117568184 | 22 | 21,934,008  | T | C | 0.0259 | 0.0184  | 0.0033 |
| rs79827548  | 2  | 124,922,510 | A | G | 0.8736 | 0.0087  | 0.0016 |
| rs11143270  | 9  | 74,964,392  | T | G | 0.1578 | -0.0079 | 0.0014 |
| rs226200    | 5  | 81,572,184  | C | G | 0.5697 | 0.0058  | 0.0011 |
| rs1857508   | 1  | 205,327,083 | C | G | 0.386  | 0.0059  | 0.0011 |
| rs12038928  | 1  | 88,701,323  | A | G | 0.6074 | -0.0059 | 0.0011 |
| rs2192025   | 7  | 122,287,948 | A | G | 0.7531 | -0.0067 | 0.0012 |
| rs12240387  | 10 | 2,664,712   | A | G | 0.3646 | -0.0060 | 0.0011 |
| rs9946776   | 18 | 49,503,635  | A | C | 0.3909 | -0.0059 | 0.0011 |
| rs502245    | 11 | 92,356,906  | A | G | 0.1489 | 0.0081  | 0.0015 |
| rs2343522   | 16 | 6,163,660   | T | G | 0.1507 | -0.0081 | 0.0015 |
| rs2356612   | 16 | 49,676,386  | T | C | 0.2229 | -0.0069 | 0.0013 |
| rs62479497  | 7  | 135,247,070 | T | C | 0.7525 | -0.0067 | 0.0012 |
| rs3130182   | 6  | 33,023,579  | A | G | 0.2777 | 0.0065  | 0.0012 |
| rs7780267   | 7  | 157,262,682 | A | C | 0.4122 | -0.0059 | 0.0011 |
| rs76289011  | 8  | 95,398,824  | A | G | 0.6348 | -0.0069 | 0.0013 |

|             |    |             |   |   |        |         |        |
|-------------|----|-------------|---|---|--------|---------|--------|
| rs1075414   | 9  | 74,931,913  | C | G | 0.6051 | -0.0059 | 0.0011 |
| rs1384015   | 11 | 13,267,489  | T | C | 0.744  | -0.0066 | 0.0012 |
| rs9375711   | 6  | 99,297,389  | A | T | 0.3241 | 0.0062  | 0.0011 |
| rs376464337 | 3  | 83,218,638  | A | T | 0.8152 | 0.0086  | 0.0016 |
| rs7167754   | 15 | 93,404,651  | A | T | 0.2543 | -0.0067 | 0.0012 |
| rs111625890 | 22 | 39,304,509  | T | C | 0.7776 | -0.0070 | 0.0013 |
| rs961450    | 4  | 16,225,685  | A | G | 0.9391 | 0.0120  | 0.0022 |
| rs56101188  | 19 | 586,745     | T | C | 0.9054 | 0.0103  | 0.0019 |
| rs2336866   | 8  | 88,008,018  | A | C | 0.8443 | -0.0080 | 0.0014 |
| rs28622958  | 14 | 41,404,557  | A | C | 0.4649 | -0.0058 | 0.0010 |
| rs12891933  | 14 | 42,690,823  | A | T | 0.9604 | 0.0149  | 0.0027 |
| rs3910664   | 2  | 182,515,795 | T | C | 0.6016 | -0.0059 | 0.0011 |
| rs114221185 | 1  | 208,978,857 | A | G | 0.1412 | 0.0083  | 0.0015 |
| rs6460090   | 7  | 74,135,844  | A | G | 0.9352 | -0.0179 | 0.0032 |
| rs13277578  | 8  | 605,302     | A | C | 0.107  | -0.0093 | 0.0017 |
| rs7940164   | 11 | 113,451,765 | T | G | 0.6683 | 0.0061  | 0.0011 |
| rs1227468   | 9  | 23,179,756  | A | T | 0.383  | -0.0059 | 0.0011 |
| rs75513050  | 13 | 55,698,865  | T | C | 0.0228 | 0.0193  | 0.0035 |
| rs78019964  | 1  | 87,232,813  | A | T | 0.9265 | -0.0110 | 0.0020 |
| rs1858867   | 16 | 23,885,171  | A | T | 0.7331 | -0.0065 | 0.0012 |
| rs116068530 | 1  | 21,939,010  | A | G | 0.0225 | 0.0194  | 0.0035 |
| rs73028346  | 11 | 133,723,384 | T | G | 0.0692 | 0.0114  | 0.0021 |
| rs12706031  | 7  | 115,045,712 | A | C | 0.4553 | 0.0058  | 0.0011 |
| rs115282909 | 2  | 180,964,681 | A | G | 0.1124 | -0.0091 | 0.0017 |
| rs3117045   | 1  | 22,363,507  | A | G | 0.3945 | 0.0059  | 0.0011 |
| rs11990191  | 8  | 88,121,957  | A | G | 0.5275 | 0.0058  | 0.0010 |
| rs7301232   | 12 | 19,131,515  | A | T | 0.1668 | -0.0077 | 0.0014 |
| rs2382458   | 9  | 14,201,012  | C | G | 0.1406 | -0.0083 | 0.0015 |
| rs1340661   | 6  | 54,023,382  | T | G | 0.2963 | -0.0063 | 0.0011 |
| rs6103038   | 20 | 41,406,142  | C | G | 0.5911 | 0.0059  | 0.0011 |
| rs115003386 | 3  | 155,310,977 | C | G | 0.0507 | 0.0134  | 0.0024 |
| rs12071309  | 1  | 210,585,013 | T | C | 0.6804 | -0.0062 | 0.0011 |
| rs10880142  | 12 | 42,143,207  | T | C | 0.1091 | -0.0092 | 0.0017 |
| rs559073    | 18 | 62,749,825  | A | G | 0.5304 | 0.0058  | 0.0010 |
| rs72891853  | 2  | 185,304,341 | T | C | 0.4782 | 0.0058  | 0.0010 |
| rs8068875   | 17 | 3,839,105   | T | C | 0.8491 | 0.0081  | 0.0015 |
| rs41119     | 19 | 34,015,904  | T | G | 0.3577 | 0.0060  | 0.0011 |
| rs11209351  | 1  | 69,259,253  | A | C | 0.4781 | 0.0058  | 0.0011 |
| rs12313886  | 12 | 119,349,630 | T | C | 0.241  | 0.0067  | 0.0012 |
| rs6973183   | 7  | 70,133,060  | C | G | 0.4393 | 0.0058  | 0.0011 |
| rs73154924  | 7  | 68,644,538  | T | C | 0.8159 | -0.0074 | 0.0014 |
| rs140163394 | 10 | 106,915,038 | A | G | 0.0231 | -0.0192 | 0.0035 |
| rs9490810   | 6  | 98,630,465  | T | G | 0.0328 | -0.0161 | 0.0029 |
| rs10283803  | 9  | 38,019,145  | T | C | 0.5177 | -0.0058 | 0.0010 |
| rs35842568  | 5  | 101,165,982 | C | G | 0.0661 | 0.0116  | 0.0021 |
| rs36035373  | 4  | 55,127,448  | A | G | 0.0146 | -0.0244 | 0.0044 |
| rs13361997  | 5  | 140,863,674 | A | C | 0.8446 | 0.0079  | 0.0014 |
| rs116841729 | 9  | 96,356,664  | T | C | 0.0761 | -0.0108 | 0.0020 |



|             |    |             |   |   |        |         |        |
|-------------|----|-------------|---|---|--------|---------|--------|
| rs57412999  | 14 | 33,273,779  | A | G | 0.9195 | -0.0106 | 0.0019 |
| rs16883014  | 5  | 53,843,335  | T | C | 0.6996 | 0.0063  | 0.0011 |
| rs12152036  | 21 | 20,136,216  | A | G | 0.4906 | 0.0057  | 0.0010 |
| rs62251572  | 3  | 60,904,762  | A | G | 0.2705 | 0.0065  | 0.0012 |
| rs10821299  | 9  | 96,895,108  | T | G | 0.1635 | -0.0078 | 0.0014 |
| rs139054361 | 13 | 100,512,268 | T | C | 0.0094 | -0.0306 | 0.0056 |
| rs115420676 | 1  | 72,156,006  | T | C | 0.0258 | -0.0201 | 0.0037 |
| rs3748328   | 14 | 94,529,082  | T | C | 0.3293 | 0.0061  | 0.0011 |
| rs11017001  | 10 | 131,683,760 | A | C | 0.3547 | -0.0062 | 0.0011 |
| rs73222573  | 4  | 10,265,107  | A | T | 0.9779 | -0.0197 | 0.0036 |
| rs2434396   | 6  | 13,455,437  | A | G | 0.5679 | 0.0058  | 0.0011 |
| rs9767816   | 7  | 92,638,788  | A | G | 0.3475 | 0.0060  | 0.0011 |
| rs251828    | 5  | 3,185,711   | T | G | 0.5982 | 0.0059  | 0.0011 |
| rs117370965 | 16 | 67,659,250  | A | C | 0.0376 | 0.0154  | 0.0028 |
| rs151272167 | 2  | 210,863,870 | T | G | 0.0416 | 0.0145  | 0.0026 |
| rs185515820 | 8  | 87,743,838  | A | T | 0.9875 | -0.0265 | 0.0048 |
| rs35445341  | 7  | 140,046,037 | A | G | 0.4522 | 0.0058  | 0.0011 |
| rs11064570  | 12 | 960,343     | C | G | 0.8328 | 0.0077  | 0.0014 |
| rs77351259  | 6  | 166,563,484 | A | C | 0.8369 | 0.0078  | 0.0014 |
| rs11649290  | 16 | 31,157,884  | A | T | 0.7226 | 0.0065  | 0.0012 |
| rs9926032   | 16 | 83,117,481  | T | C | 0.5587 | -0.0058 | 0.0011 |
| rs6596534   | 5  | 102,882,317 | A | G | 0.3088 | 0.0062  | 0.0011 |
| rs73400807  | 12 | 116,804,002 | A | G | 0.8655 | 0.0084  | 0.0015 |
| rs3008032   | 6  | 166,041,635 | A | G | 0.2014 | 0.0072  | 0.0013 |
| rs9383200   | 6  | 16,669,017  | A | G | 0.8505 | 0.0081  | 0.0015 |
| rs6722777   | 2  | 161,731,185 | T | C | 0.0423 | -0.0147 | 0.0027 |
| rs55642578  | 15 | 66,147,299  | A | G | 0.1586 | 0.0079  | 0.0014 |
| rs114179811 | 3  | 23,437,128  | T | G | 0.9888 | -0.0278 | 0.0051 |
| rs10756631  | 9  | 1,506,101   | T | C | 0.4899 | -0.0058 | 0.0011 |
| rs7183877   | 15 | 28,365,733  | A | C | 0.0794 | 0.0106  | 0.0019 |
| rs80171880  | 3  | 114,884,690 | A | G | 0.0618 | 0.0119  | 0.0022 |
| rs2951812   | 8  | 35,954,918  | C | G | 0.5113 | -0.0058 | 0.0010 |
| rs1992442   | 8  | 19,853,389  | A | C | 0.7314 | -0.0065 | 0.0012 |
| rs59483928  | 13 | 59,837,062  | T | G | 0.6642 | 0.0061  | 0.0011 |
| rs4923705   | 15 | 36,293,605  | A | G | 0.7592 | 0.0067  | 0.0012 |
| rs6080772   | 20 | 17,651,168  | A | T | 0.1754 | 0.0075  | 0.0014 |
| rs847752    | 6  | 40,034,557  | T | C | 0.7354 | -0.0065 | 0.0012 |
| rs1388039   | 4  | 105,925,370 | A | G | 0.6657 | -0.0061 | 0.0011 |
| rs55709029  | 14 | 59,910,028  | T | C | 0.2488 | -0.0067 | 0.0012 |
| rs34980782  | 21 | 18,415,489  | T | C | 0.8894 | 0.0092  | 0.0017 |
| rs78117611  | 12 | 203,339     | C | G | 0.9455 | -0.0128 | 0.0023 |
| rs6802558   | 3  | 69,281,337  | C | G | 0.2908 | 0.0063  | 0.0012 |
| rs62300090  | 4  | 55,380,519  | T | C | 0.1032 | 0.0094  | 0.0017 |
| rs58622306  | 19 | 36,403,062  | A | C | 0.9668 | 0.0162  | 0.0029 |
| rs35481245  | 2  | 100,220,409 | T | C | 0.3586 | -0.0060 | 0.0011 |
| rs10813085  | 9  | 29,427,472  | T | C | 0.1947 | 0.0072  | 0.0013 |
| rs75962830  | 15 | 64,109,599  | A | G | 0.0302 | 0.0172  | 0.0031 |
| rs11679792  | 2  | 49,873,364  | A | G | 0.498  | 0.0057  | 0.0010 |

|             |    |             |   |   |        |         |        |
|-------------|----|-------------|---|---|--------|---------|--------|
| rs540471756 | 10 | 22,136,868  | T | C | 0.9941 | 0.0396  | 0.0072 |
| rs12358273  | 10 | 94,408,857  | T | G | 0.0441 | 0.0141  | 0.0026 |
| rs1461224   | 5  | 153,186,237 | T | G | 0.5229 | 0.0057  | 0.0010 |
| rs79814671  | 17 | 28,505,483  | A | G | 0.9808 | 0.0215  | 0.0039 |
| rs10193515  | 2  | 224,631,953 | T | C | 0.4853 | 0.0057  | 0.0010 |
| rs73088467  | 12 | 23,079,207  | T | C | 0.1058 | -0.0093 | 0.0017 |
| rs77265491  | 17 | 50,843,663  | A | C | 0.9671 | -0.0166 | 0.0030 |
| rs10064877  | 5  | 91,968,603  | T | C | 0.1616 | 0.0078  | 0.0014 |
| rs689545    | 2  | 34,978,940  | A | T | 0.825  | 0.0075  | 0.0014 |
| rs72772094  | 10 | 11,073,891  | T | C | 0.08   | 0.0107  | 0.0019 |
| rs62426270  | 6  | 126,854,838 | A | G | 0.0326 | 0.0163  | 0.0030 |
| rs77830706  | 15 | 58,612,164  | A | G | 0.9252 | 0.0109  | 0.0020 |
| rs9942452   | 6  | 37,490,013  | T | C | 0.1269 | -0.0086 | 0.0016 |
| rs10766450  | 11 | 18,039,056  | C | G | 0.4307 | -0.0058 | 0.0011 |
| rs35711462  | 5  | 50,847,577  | A | G | 0.4926 | 0.0057  | 0.0010 |
| rs79766583  | 2  | 146,701,256 | T | G | 0.1272 | 0.0086  | 0.0016 |
| rs58544493  | 5  | 173,486,119 | T | C | 0.094  | -0.0098 | 0.0018 |
| rs7303346   | 12 | 117,535,141 | T | C | 0.7052 | 0.0063  | 0.0012 |
| rs13019103  | 2  | 221,970,171 | A | G | 0.5277 | 0.0057  | 0.0010 |
| rs4351620   | 1  | 195,809,789 | A | G | 0.4121 | 0.0058  | 0.0011 |
| rs66972935  | 4  | 16,103,365  | A | T | 0.248  | -0.0066 | 0.0012 |
| rs72620512  | 19 | 3,218,223   | T | C | 0.8785 | 0.0088  | 0.0016 |
| rs10762188  | 10 | 69,876,930  | A | G | 0.3643 | -0.0059 | 0.0011 |
| rs1116100   | 20 | 43,668,473  | A | G | 0.845  | -0.0079 | 0.0014 |
| rs9349529   | 6  | 50,261,878  | A | C | 0.5106 | 0.0057  | 0.0010 |
| rs3131726   | 1  | 58,192,123  | A | C | 0.2884 | 0.0064  | 0.0012 |
| rs7669193   | 4  | 24,263,749  | C | G | 0.7886 | 0.0070  | 0.0013 |
| rs9963991   | 18 | 4,733,644   | T | C | 0.6684 | -0.0061 | 0.0011 |
| rs6910662   | 6  | 22,637,458  | A | T | 0.4872 | 0.0057  | 0.0010 |
| rs17721809  | 15 | 40,283,099  | A | G | 0.695  | -0.0062 | 0.0011 |
| rs35359530  | 12 | 27,169,098  | T | C | 0.959  | -0.0145 | 0.0026 |
| rs1585524   | 4  | 66,959,264  | A | G | 0.4681 | 0.0058  | 0.0011 |
| rs12747808  | 1  | 60,348,346  | T | C | 0.8432 | 0.0079  | 0.0014 |
| rs62246014  | 3  | 71,466,347  | A | G | 0.1209 | 0.0088  | 0.0016 |
| rs544308127 | 9  | 7,195,140   | T | C | 0.0214 | 0.0228  | 0.0042 |
| rs35372440  | 8  | 119,419,054 | A | T | 0.8085 | 0.0073  | 0.0013 |
| rs116762274 | 5  | 176,266,874 | C | G | 0.019  | 0.0214  | 0.0039 |
| rs12456386  | 18 | 27,667,312  | A | G | 0.9203 | -0.0106 | 0.0019 |
| rs13047733  | 21 | 33,419,639  | A | G | 0.6013 | -0.0058 | 0.0011 |
| rs2350901   | 14 | 60,948,128  | A | G | 0.1224 | 0.0087  | 0.0016 |
| rs6992349   | 8  | 10,067,407  | A | G | 0.2318 | -0.0068 | 0.0012 |
| rs1137045   | 17 | 79,003,644  | A | G | 0.5309 | 0.0058  | 0.0011 |
| rs62433165  | 7  | 11,950,964  | A | G | 0.0632 | -0.0118 | 0.0022 |
| rs28520307  | 4  | 63,234,936  | A | T | 0.2901 | -0.0063 | 0.0012 |
| rs114188957 | 3  | 52,148,623  | T | G | 0.9701 | 0.0170  | 0.0031 |
| rs61770290  | 1  | 44,368,543  | T | C | 0.0511 | 0.0133  | 0.0024 |
| rs1865178   | 4  | 130,373,727 | A | G | 0.7372 | 0.0065  | 0.0012 |
| rs555491688 | 6  | 33,234,565  | A | T | 0.9934 | -0.0373 | 0.0068 |

|             |    |             |   |   |        |         |        |
|-------------|----|-------------|---|---|--------|---------|--------|
| rs10809177  | 9  | 10,733,920  | T | C | 0.275  | 0.0064  | 0.0012 |
| rs17520385  | 15 | 92,813,980  | T | C | 0.6719 | 0.0061  | 0.0011 |
| rs4331712   | 3  | 159,893,661 | A | C | 0.6462 | 0.0060  | 0.0011 |
| rs4409028   | 4  | 118,276,666 | A | C | 0.6444 | 0.0060  | 0.0011 |
| rs115288136 | 6  | 112,992,912 | A | G | 0.7368 | -0.0075 | 0.0014 |
| rs9315985   | 13 | 21,482,172  | T | C | 0.1297 | 0.0085  | 0.0016 |
| rs10842707  | 12 | 26,471,364  | T | C | 0.2239 | 0.0068  | 0.0013 |
| rs1632822   | 9  | 118,225,902 | C | G | 0.382  | 0.0059  | 0.0011 |
| rs11249937  | 8  | 9,534,392   | T | C | 0.7919 | -0.0070 | 0.0013 |
| rs10278520  | 7  | 132,067,168 | C | G | 0.3123 | 0.0062  | 0.0011 |
| rs2147810   | 13 | 72,364,956  | A | G | 0.2907 | 0.0063  | 0.0012 |
| rs10903706  | 10 | 2,271,259   | T | C | 0.6665 | 0.0061  | 0.0011 |
| rs2795022   | 20 | 11,873,317  | T | C | 0.4042 | 0.0058  | 0.0011 |
| rs77520009  | 13 | 66,979,595  | T | C | 0.0685 | 0.0113  | 0.0021 |
| rs609777    | 3  | 107,343,402 | A | G | 0.702  | -0.0062 | 0.0011 |
| rs138334012 | 2  | 161,847,671 | T | C | 0.9928 | -0.0345 | 0.0063 |
| rs4082330   | 10 | 65,497,266  | T | C | 0.8174 | -0.0074 | 0.0014 |
| rs77566578  | 3  | 167,118,004 | T | C | 0.8737 | 0.0086  | 0.0016 |
| rs12585625  | 13 | 80,012,196  | T | G | 0.3538 | 0.0060  | 0.0011 |

Notes: Clumping of GWAS results was performed as described in the Supplementary Section 2.2.6. SNPs are ordered by their genomic positions and the positions are reported for human genome build 37 (hg19). Standard errors (S.E.) and  $P$  values are derived from two-point LDSC intercept of 1.663. The analysis is based on 10,675,380 SNPs. The average  $\chi^2$  statistic across all 10,675,380 SNPs is 0.4042 (respectively) and  $\lambda_{GC}$  is 3.545 (unadjusted).

2 (P < 5×10<sup>-8</sup>) in the additive GWAS of *EduYears*

| <i>P</i> value | Hetero <i>I</i> <sup>2</sup> | Hetero <i>P</i> | <i>N</i>  |
|----------------|------------------------------|-----------------|-----------|
| 2.89E-140      | 30                           | 1.55E-02        | 2,990,475 |
| 2.62E-126      | 20.8                         | 6.99E-02        | 3,035,553 |
| 2.58E-102      | 19.6                         | 8.15E-02        | 3,037,499 |
| 3.15E-97       | 30.5                         | 9.87E-03        | 3,036,955 |
| 8.08E-90       | 0                            | 8.97E-01        | 3,036,702 |
| 4.88E-84       | 15.1                         | 1.50E-01        | 3,024,163 |
| 1.32E-74       | 18.9                         | 9.36E-02        | 3,036,158 |
| 4.34E-72       | 0                            | 8.34E-01        | 3,022,450 |
| 5.23E-72       | 43.5                         | 3.01E-04        | 3,007,427 |
| 1.77E-71       | 20.3                         | 8.32E-02        | 3,007,760 |
| 1.14E-69       | 2.7                          | 4.15E-01        | 3,035,786 |
| 9.28E-65       | 22                           | 5.58E-02        | 3,037,499 |
| 2.21E-62       | 4.2                          | 3.76E-01        | 3,037,499 |
| 3.47E-61       | 0                            | 9.65E-01        | 3,037,499 |
| 4.03E-58       | 0                            | 1.00E+00        | 2,272,216 |
| 4.44E-58       | 8.6                          | 2.82E-01        | 3,019,216 |
| 7.17E-58       | 2.7                          | 4.13E-01        | 3,037,499 |
| 3.65E-55       | 7.2                          | 3.24E-01        | 2,999,477 |
| 3.98E-55       | 13.1                         | 1.82E-01        | 3,037,499 |
| 4.03E-55       | 5.1                          | 3.58E-01        | 3,035,242 |
| 2.76E-53       | 1.4                          | 4.45E-01        | 3,033,958 |
| 6.58E-53       | 32.1                         | 6.72E-03        | 3,000,071 |
| 9.07E-51       | 2.7                          | 4.14E-01        | 3,037,499 |
| 1.70E-50       | 4.4                          | 3.76E-01        | 3,027,053 |
| 1.29E-49       | 0                            | 6.55E-01        | 3,037,499 |
| 1.42E-49       | 0                            | 8.55E-01        | 3,036,702 |
| 1.73E-49       | 0                            | 5.29E-01        | 3,037,499 |
| 3.31E-49       | 13.3                         | 1.78E-01        | 3,037,499 |
| 1.95E-48       | 0                            | 5.06E-01        | 3,034,989 |
| 2.51E-48       | 11.4                         | 2.17E-01        | 3,035,066 |
| 9.67E-48       | 0                            | 6.87E-01        | 3,036,158 |
| 2.09E-46       | 0                            | 4.94E-01        | 3,035,066 |
| 6.97E-46       | 8.8                          | 2.77E-01        | 3,031,382 |
| 1.27E-45       | 22.2                         | 5.43E-02        | 3,037,499 |
| 1.54E-45       | 0                            | 7.18E-01        | 3,033,316 |
| 1.63E-45       | 21.2                         | 7.07E-02        | 3,015,311 |
| 1.97E-45       | 0                            | 8.83E-01        | 2,952,067 |
| 2.36E-45       | 0.8                          | 4.58E-01        | 3,024,960 |
| 3.44E-45       | 0                            | 5.13E-01        | 3,035,786 |
| 7.31E-45       | 1                            | 4.53E-01        | 3,035,786 |
| 1.08E-44       | 0                            | 5.48E-01        | 3,024,960 |
| 1.66E-44       | 17.1                         | 1.16E-01        | 3,037,499 |
| 1.36E-43       | 5.2                          | 3.54E-01        | 3,037,499 |
| 1.76E-43       | 5.1                          | 3.56E-01        | 3,036,702 |
| 6.54E-43       | 5.5                          | 3.47E-01        | 3,024,163 |

|          |      |          |           |
|----------|------|----------|-----------|
| 2.29E-42 | 2.4  | 4.21E-01 | 3,035,242 |
| 2.37E-42 | 0    | 7.14E-01 | 3,036,702 |
| 2.39E-42 | 29.7 | 1.21E-02 | 3,035,066 |
| 2.44E-42 | 0    | 4.87E-01 | 3,006,838 |
| 1.34E-41 | 0    | 6.75E-01 | 2,985,984 |
| 1.50E-41 | 0    | 5.77E-01 | 3,037,499 |
| 1.86E-41 | 0    | 4.98E-01 | 3,036,702 |
| 2.08E-41 | 10.9 | 2.27E-01 | 3,036,702 |
| 4.52E-41 | 20.5 | 7.11E-02 | 3,037,499 |
| 1.12E-40 | 21.4 | 6.97E-02 | 3,018,322 |
| 1.78E-40 | 20.6 | 7.47E-02 | 3,022,450 |
| 2.16E-40 | 0    | 9.81E-01 | 3,037,499 |
| 2.36E-40 | 0    | 9.51E-01 | 3,037,499 |
| 5.72E-40 | 0    | 5.88E-01 | 3,022,450 |
| 8.27E-40 | 18   | 1.02E-01 | 3,037,499 |
| 1.05E-39 | 13   | 1.85E-01 | 3,037,499 |
| 1.29E-39 | 0    | 7.02E-01 | 3,015,850 |
| 1.52E-39 | 6.3  | 3.29E-01 | 3,036,702 |
| 7.74E-39 | 16   | 1.32E-01 | 3,037,499 |
| 2.70E-38 | 6.4  | 3.28E-01 | 3,030,170 |
| 3.67E-38 | 2.5  | 4.19E-01 | 3,036,702 |
| 3.81E-38 | 29.9 | 1.21E-02 | 3,034,899 |
| 9.16E-38 | 0    | 7.15E-01 | 3,037,499 |
| 1.30E-37 | 24.8 | 3.50E-02 | 3,036,955 |
| 3.17E-37 | 20.4 | 7.49E-02 | 3,023,247 |
| 1.44E-36 | 0    | 7.86E-01 | 3,035,786 |
| 1.64E-36 | 9.7  | 2.51E-01 | 3,037,499 |
| 2.05E-36 | 26.8 | 2.41E-02 | 3,034,989 |
| 4.38E-36 | 0    | 6.29E-01 | 3,000,868 |
| 4.61E-36 | 22.5 | 5.20E-02 | 3,037,499 |
| 4.75E-36 | 31.7 | 6.86E-03 | 3,037,499 |
| 5.21E-36 | 0    | 7.84E-01 | 3,036,702 |
| 6.68E-36 | 16   | 1.35E-01 | 3,022,527 |
| 1.07E-35 | 9.7  | 2.52E-01 | 3,037,499 |
| 1.26E-35 | 7.7  | 2.96E-01 | 3,037,499 |
| 1.39E-35 | 7.8  | 2.95E-01 | 3,035,786 |
| 1.69E-35 | 17.7 | 1.09E-01 | 3,034,989 |
| 1.82E-35 | 8.9  | 2.71E-01 | 3,035,786 |
| 2.40E-35 | 24.6 | 3.54E-02 | 3,037,499 |
| 3.24E-35 | 0    | 8.50E-01 | 3,037,499 |
| 3.35E-35 | 20.7 | 6.91E-02 | 3,037,499 |
| 3.44E-35 | 8.7  | 2.77E-01 | 3,023,247 |
| 6.56E-35 | 14.1 | 1.70E-01 | 3,030,656 |
| 6.76E-35 | 0    | 6.75E-01 | 3,036,702 |
| 7.81E-35 | 8.7  | 2.93E-01 | 2,991,835 |
| 1.20E-34 | 45   | 3.94E-05 | 3,036,702 |
| 2.49E-34 | 1.1  | 4.51E-01 | 3,035,242 |
| 2.60E-34 | 12.9 | 1.87E-01 | 3,035,786 |

|          |      |          |           |
|----------|------|----------|-----------|
| 3.50E-34 | 15.4 | 1.43E-01 | 3,035,671 |
| 3.97E-34 | 0    | 5.20E-01 | 3,034,091 |
| 5.63E-34 | 0    | 7.71E-01 | 3,009,771 |
| 5.95E-34 | 20.1 | 7.56E-02 | 3,037,499 |
| 7.69E-34 | 0    | 6.79E-01 | 3,034,091 |
| 9.09E-34 | 5.2  | 3.54E-01 | 3,037,499 |
| 1.57E-33 | 0    | 9.34E-01 | 3,036,670 |
| 3.15E-33 | 0    | 6.03E-01 | 3,015,195 |
| 4.73E-33 | 26.1 | 4.33E-02 | 2,520,096 |
| 7.59E-33 | 0    | 8.42E-01 | 3,037,499 |
| 1.00E-32 | 24.1 | 3.97E-02 | 3,035,880 |
| 1.98E-32 | 11.6 | 2.17E-01 | 3,018,473 |
| 2.00E-32 | 0.3  | 4.71E-01 | 3,037,499 |
| 6.34E-32 | 0    | 6.95E-01 | 3,037,499 |
| 6.96E-32 | 12.6 | 1.94E-01 | 3,035,786 |
| 9.79E-32 | 0    | 7.19E-01 | 3,036,955 |
| 1.01E-31 | 34.1 | 3.41E-03 | 3,037,499 |
| 1.08E-31 | 19.6 | 8.20E-02 | 3,037,499 |
| 1.65E-31 | 0.8  | 4.60E-01 | 3,037,499 |
| 2.45E-31 | 6.3  | 3.29E-01 | 3,037,499 |
| 2.61E-31 | 0    | 6.73E-01 | 3,037,499 |
| 3.53E-31 | 18.9 | 9.01E-02 | 3,037,499 |
| 5.98E-31 | 0    | 5.12E-01 | 2,841,971 |
| 7.90E-31 | 0    | 5.71E-01 | 3,037,499 |
| 8.61E-31 | 0    | 7.84E-01 | 3,030,086 |
| 1.13E-30 | 0    | 8.89E-01 | 3,035,786 |
| 1.25E-30 | 0    | 9.71E-01 | 3,037,499 |
| 1.56E-30 | 5.4  | 3.49E-01 | 3,036,702 |
| 2.73E-30 | 0    | 7.33E-01 | 3,030,783 |
| 2.82E-30 | 15.5 | 1.45E-01 | 3,031,734 |
| 4.04E-30 | 17   | 1.27E-01 | 3,017,369 |
| 4.75E-30 | 7.7  | 2.96E-01 | 3,037,499 |
| 4.81E-30 | 18.5 | 9.59E-02 | 3,037,499 |
| 7.13E-30 | 0    | 5.95E-01 | 3,030,342 |
| 9.25E-30 | 14.9 | 1.55E-01 | 3,023,442 |
| 1.01E-29 | 18.3 | 9.82E-02 | 3,037,499 |
| 1.11E-29 | 6.8  | 3.33E-01 | 2,955,906 |
| 1.22E-29 | 5.8  | 3.52E-01 | 2,989,918 |
| 1.58E-29 | 0    | 5.39E-01 | 3,036,702 |
| 2.24E-29 | 0.3  | 4.69E-01 | 3,031,603 |
| 2.42E-29 | 37.5 | 1.44E-03 | 3,020,017 |
| 2.63E-29 | 26.5 | 2.52E-02 | 3,036,702 |
| 2.80E-29 | 0    | 1.00E+00 | 2,272,216 |
| 3.53E-29 | 9.9  | 2.47E-01 | 3,037,499 |
| 4.42E-29 | 24.9 | 3.71E-02 | 3,029,299 |
| 4.70E-29 | 0    | 5.13E-01 | 3,021,552 |
| 8.26E-29 | 0    | 6.98E-01 | 3,034,989 |
| 9.53E-29 | 0    | 6.98E-01 | 3,000,071 |

|          |      |          |           |
|----------|------|----------|-----------|
| 1.02E-28 | 0    | 7.46E-01 | 3,036,702 |
| 1.06E-28 | 16   | 1.37E-01 | 3,031,275 |
| 1.29E-28 | 0    | 4.96E-01 | 3,036,702 |
| 2.04E-28 | 28.6 | 1.76E-02 | 2,986,072 |
| 2.33E-28 | 0    | 7.69E-01 | 3,035,786 |
| 2.44E-28 | 0    | 7.18E-01 | 3,037,499 |
| 3.01E-28 | 0    | 6.46E-01 | 3,036,702 |
| 3.23E-28 | 4.8  | 3.63E-01 | 3,035,553 |
| 3.33E-28 | 0    | 8.91E-01 | 3,036,702 |
| 5.19E-28 | 0    | 6.67E-01 | 3,001,375 |
| 5.27E-28 | 30.9 | 1.16E-02 | 3,004,923 |
| 5.42E-28 | 0    | 4.97E-01 | 3,037,499 |
| 5.97E-28 | 21.3 | 6.84E-02 | 3,032,440 |
| 6.79E-28 | 23.6 | 4.39E-02 | 3,036,702 |
| 7.71E-28 | 19.7 | 8.19E-02 | 3,036,955 |
| 8.43E-28 | 0    | 8.09E-01 | 3,035,786 |
| 9.70E-28 | 0    | 9.25E-01 | 3,037,499 |
| 1.58E-27 | 0    | 6.02E-01 | 3,037,499 |
| 2.64E-27 | 11.2 | 2.21E-01 | 3,035,066 |
| 3.42E-27 | 0    | 8.74E-01 | 3,034,989 |
| 4.12E-27 | 29.9 | 1.12E-02 | 3,037,499 |
| 4.56E-27 | 0    | 4.78E-01 | 3,022,080 |
| 4.91E-27 | 0    | 7.71E-01 | 3,036,702 |
| 5.98E-27 | 6.5  | 3.23E-01 | 3,037,499 |
| 6.06E-27 | 0    | 5.07E-01 | 3,023,247 |
| 6.07E-27 | 10.5 | 2.35E-01 | 2,397,618 |
| 6.11E-27 | 0    | 4.95E-01 | 3,014,535 |
| 8.46E-27 | 0    | 5.49E-01 | 3,037,499 |
| 1.13E-26 | 0    | 6.72E-01 | 3,037,499 |
| 1.17E-26 | 3.9  | 3.84E-01 | 3,037,499 |
| 1.20E-26 | 20.4 | 7.21E-02 | 3,037,499 |
| 1.71E-26 | 11.8 | 2.58E-01 | 2,962,303 |
| 1.89E-26 | 0    | 4.84E-01 | 3,035,066 |
| 1.98E-26 | 0    | 7.24E-01 | 3,037,499 |
| 2.40E-26 | 10.6 | 2.34E-01 | 3,036,955 |
| 2.81E-26 | 0    | 5.59E-01 | 3,037,499 |
| 3.27E-26 | 0    | 9.71E-01 | 3,035,786 |
| 4.70E-26 | 0    | 6.03E-01 | 3,021,730 |
| 5.43E-26 | 0    | 6.43E-01 | 3,028,373 |
| 5.62E-26 | 19.6 | 8.34E-02 | 3,036,702 |
| 5.90E-26 | 6.8  | 3.16E-01 | 3,037,499 |
| 6.83E-26 | 10   | 2.48E-01 | 3,033,433 |
| 7.08E-26 | 0    | 8.66E-01 | 3,036,702 |
| 7.10E-26 | 13.6 | 1.74E-01 | 3,035,786 |
| 7.58E-26 | 0    | 6.18E-01 | 3,037,499 |
| 7.66E-26 | 0    | 7.72E-01 | 3,037,499 |
| 7.71E-26 | 1.5  | 4.43E-01 | 3,036,158 |
| 8.08E-26 | 24.9 | 3.45E-02 | 3,036,702 |

|          |      |          |           |
|----------|------|----------|-----------|
| 8.72E-26 | 18.7 | 9.47E-02 | 3,035,786 |
| 9.13E-26 | 21.7 | 6.00E-02 | 3,036,955 |
| 9.56E-26 | 0    | 5.91E-01 | 3,036,702 |
| 1.13E-25 | 0    | 6.81E-01 | 3,036,702 |
| 1.15E-25 | 0    | 1.00E+00 | 2,272,216 |
| 1.40E-25 | 3.6  | 3.92E-01 | 3,037,499 |
| 2.16E-25 | 10.5 | 2.35E-01 | 3,037,499 |
| 2.83E-25 | 17.2 | 1.14E-01 | 3,037,499 |
| 3.43E-25 | 0    | 7.94E-01 | 3,021,983 |
| 4.04E-25 | 0    | 6.38E-01 | 3,034,756 |
| 4.25E-25 | 0    | 9.62E-01 | 3,037,499 |
| 4.41E-25 | 0    | 5.05E-01 | 3,033,840 |
| 4.76E-25 | 0.2  | 4.73E-01 | 3,037,499 |
| 5.57E-25 | 0    | 5.63E-01 | 3,037,499 |
| 8.34E-25 | 0    | 8.73E-01 | 3,036,702 |
| 9.50E-25 | 13.3 | 1.83E-01 | 2,999,527 |
| 9.74E-25 | 5.2  | 3.55E-01 | 3,037,499 |
| 9.93E-25 | 0    | 9.16E-01 | 3,036,702 |
| 1.09E-24 | 0    | 9.92E-01 | 3,037,499 |
| 1.11E-24 | 8.2  | 2.87E-01 | 3,023,247 |
| 1.28E-24 | 0    | 7.99E-01 | 3,037,499 |
| 1.37E-24 | 1    | 4.53E-01 | 3,035,242 |
| 1.39E-24 | 0    | 5.10E-01 | 2,287,336 |
| 1.49E-24 | 24.5 | 3.58E-02 | 3,037,499 |
| 2.22E-24 | 28.2 | 1.86E-02 | 2,996,722 |
| 2.36E-24 | 9.1  | 2.65E-01 | 3,035,786 |
| 2.44E-24 | 0    | 5.17E-01 | 3,037,499 |
| 2.85E-24 | 13.9 | 1.70E-01 | 3,036,955 |
| 3.02E-24 | 0    | 7.25E-01 | 3,031,533 |
| 3.13E-24 | 0    | 5.20E-01 | 3,022,450 |
| 3.26E-24 | 11.8 | 2.10E-01 | 3,036,702 |
| 3.56E-24 | 41.3 | 4.18E-04 | 3,013,222 |
| 4.04E-24 | 22.9 | 6.68E-02 | 2,995,138 |
| 4.15E-24 | 3.8  | 3.87E-01 | 3,037,499 |
| 4.16E-24 | 10   | 2.45E-01 | 2,315,814 |
| 4.47E-24 | 0    | 5.53E-01 | 3,030,610 |
| 5.18E-24 | 0    | 9.96E-01 | 3,037,499 |
| 5.84E-24 | 0    | 6.40E-01 | 3,036,702 |
| 7.06E-24 | 0    | 8.29E-01 | 3,035,786 |
| 7.16E-24 | 13.8 | 1.69E-01 | 3,037,499 |
| 7.48E-24 | 0    | 6.78E-01 | 3,005,978 |
| 8.10E-24 | 0    | 8.13E-01 | 3,031,738 |
| 8.53E-24 | 0    | 5.32E-01 | 3,036,955 |
| 9.31E-24 | 2.3  | 4.24E-01 | 3,021,319 |
| 9.36E-24 | 0    | 5.15E-01 | 3,035,786 |
| 1.01E-23 | 17.8 | 1.10E-01 | 3,032,809 |
| 1.10E-23 | 9.4  | 2.57E-01 | 3,037,499 |
| 1.26E-23 | 0    | 7.15E-01 | 3,037,499 |



|          |      |          |           |
|----------|------|----------|-----------|
| 1.35E-23 | 39   | 5.97E-04 | 3,037,499 |
| 1.51E-23 | 0    | 5.67E-01 | 3,036,702 |
| 1.55E-23 | 2    | 4.29E-01 | 3,037,499 |
| 1.65E-23 | 0    | 8.56E-01 | 3,036,702 |
| 1.66E-23 | 0    | 5.20E-01 | 3,035,880 |
| 1.70E-23 | 0    | 7.29E-01 | 3,014,503 |
| 1.84E-23 | 21.3 | 6.34E-02 | 3,037,499 |
| 1.97E-23 | 0    | 9.50E-01 | 3,033,353 |
| 1.99E-23 | 0.2  | 4.72E-01 | 3,022,450 |
| 2.08E-23 | 0    | 4.81E-01 | 3,036,585 |
| 2.08E-23 | 5.9  | 3.36E-01 | 3,037,499 |
| 2.08E-23 | 5.7  | 3.43E-01 | 3,036,702 |
| 2.21E-23 | 14.6 | 1.57E-01 | 3,036,702 |
| 2.25E-23 | 8.6  | 2.78E-01 | 3,034,091 |
| 2.35E-23 | 22.3 | 7.00E-02 | 2,997,716 |
| 2.55E-23 | 26.7 | 2.38E-02 | 3,036,702 |
| 2.73E-23 | 15.8 | 1.36E-01 | 3,035,786 |
| 2.90E-23 | 12.1 | 2.07E-01 | 3,024,832 |
| 2.96E-23 | 0    | 6.67E-01 | 3,037,499 |
| 3.05E-23 | 30.8 | 8.69E-03 | 3,037,499 |
| 3.20E-23 | 0    | 8.06E-01 | 3,036,955 |
| 3.23E-23 | 0    | 5.29E-01 | 3,037,499 |
| 3.49E-23 | 0    | 8.00E-01 | 3,036,955 |
| 3.50E-23 | 0    | 5.00E-01 | 3,037,499 |
| 3.52E-23 | 7.8  | 2.95E-01 | 3,036,702 |
| 3.71E-23 | 2.3  | 4.26E-01 | 3,018,539 |
| 4.80E-23 | 20.1 | 7.59E-02 | 3,037,499 |
| 5.14E-23 | 0    | 8.75E-01 | 2,975,847 |
| 5.67E-23 | 5.2  | 3.54E-01 | 3,036,955 |
| 6.03E-23 | 0    | 5.32E-01 | 3,035,786 |
| 6.03E-23 | 29.7 | 1.42E-02 | 3,021,536 |
| 6.04E-23 | 17.9 | 1.04E-01 | 3,036,702 |
| 6.48E-23 | 15.3 | 1.46E-01 | 2,998,922 |
| 6.57E-23 | 3    | 4.07E-01 | 3,035,786 |
| 6.83E-23 | 7    | 3.12E-01 | 3,035,786 |
| 6.87E-23 | 0    | 6.37E-01 | 3,035,786 |
| 7.84E-23 | 32.3 | 5.84E-03 | 3,037,499 |
| 8.59E-23 | 15.8 | 1.37E-01 | 3,036,702 |
| 8.99E-23 | 24.2 | 3.78E-02 | 3,037,499 |
| 9.16E-23 | 14.7 | 1.53E-01 | 3,037,499 |
| 9.30E-23 | 9.3  | 2.66E-01 | 3,024,529 |
| 1.04E-22 | 0    | 8.93E-01 | 3,037,499 |
| 1.05E-22 | 20.2 | 7.70E-02 | 3,034,989 |
| 1.05E-22 | 23.8 | 4.23E-02 | 3,035,786 |
| 1.13E-22 | 0    | 5.22E-01 | 3,026,498 |
| 1.18E-22 | 1.2  | 4.50E-01 | 3,022,703 |
| 1.20E-22 | 10.5 | 2.35E-01 | 3,037,499 |
| 1.33E-22 | 3.5  | 3.95E-01 | 3,037,499 |

|          |      |          |           |
|----------|------|----------|-----------|
| 1.68E-22 | 0    | 8.94E-01 | 3,037,499 |
| 1.94E-22 | 0    | 7.88E-01 | 3,033,032 |
| 2.05E-22 | 0    | 9.89E-01 | 3,037,499 |
| 2.12E-22 | 15.9 | 1.34E-01 | 3,037,499 |
| 2.22E-22 | 4.5  | 3.70E-01 | 3,037,499 |
| 2.23E-22 | 5.4  | 3.50E-01 | 3,037,499 |
| 2.54E-22 | 4.1  | 3.80E-01 | 3,037,499 |
| 2.93E-22 | 30.3 | 1.00E-02 | 3,037,499 |
| 2.97E-22 | 0    | 7.87E-01 | 3,037,499 |
| 3.46E-22 | 0    | 9.21E-01 | 3,037,499 |
| 3.66E-22 | 27.3 | 2.02E-02 | 3,037,499 |
| 3.86E-22 | 9.4  | 2.68E-01 | 3,026,442 |
| 4.56E-22 | 14.6 | 1.58E-01 | 3,033,966 |
| 4.75E-22 | 17.6 | 1.08E-01 | 3,037,499 |
| 4.86E-22 | 0    | 4.78E-01 | 2,997,460 |
| 5.30E-22 | 18.6 | 1.00E-01 | 3,034,075 |
| 5.48E-22 | 7.1  | 3.12E-01 | 3,036,158 |
| 5.63E-22 | 0    | 6.19E-01 | 3,035,786 |
| 5.78E-22 | 3.2  | 4.01E-01 | 3,036,702 |
| 5.97E-22 | 5    | 3.60E-01 | 3,000,868 |
| 6.09E-22 | 19.2 | 8.58E-02 | 3,037,499 |
| 6.37E-22 | 7.9  | 2.92E-01 | 3,037,499 |
| 6.42E-22 | 0    | 5.72E-01 | 3,019,668 |
| 6.62E-22 | 0    | 5.34E-01 | 3,024,960 |
| 7.94E-22 | 6.6  | 3.22E-01 | 3,035,786 |
| 8.01E-22 | 15.2 | 1.50E-01 | 3,023,265 |
| 8.30E-22 | 7.7  | 2.97E-01 | 3,037,499 |
| 8.74E-22 | 32.5 | 7.37E-03 | 2,984,009 |
| 9.86E-22 | 9.4  | 2.59E-01 | 3,036,955 |
| 1.00E-21 | 27.8 | 1.81E-02 | 3,037,499 |
| 1.05E-21 | 7.6  | 2.99E-01 | 3,037,499 |
| 1.18E-21 | 0    | 5.19E-01 | 3,035,066 |
| 1.18E-21 | 6.1  | 3.32E-01 | 3,037,499 |
| 1.18E-21 | 14.3 | 1.66E-01 | 3,022,450 |
| 1.20E-21 | 25.9 | 2.74E-02 | 3,037,499 |
| 1.20E-21 | 26.9 | 2.29E-02 | 3,036,702 |
| 1.23E-21 | 2.2  | 4.26E-01 | 3,035,786 |
| 1.27E-21 | 0    | 7.84E-01 | 3,034,091 |
| 1.37E-21 | 4.9  | 3.62E-01 | 3,036,702 |
| 1.66E-21 | 22.4 | 5.21E-02 | 3,037,499 |
| 1.74E-21 | 22.8 | 4.88E-02 | 3,037,499 |
| 1.90E-21 | 6.7  | 3.22E-01 | 3,015,729 |
| 1.93E-21 | 16.4 | 1.30E-01 | 3,035,007 |
| 2.33E-21 | 0    | 6.63E-01 | 3,036,702 |
| 2.46E-21 | 5.6  | 3.45E-01 | 3,036,702 |
| 2.47E-21 | 11   | 2.23E-01 | 3,037,499 |
| 2.49E-21 | 10.4 | 2.37E-01 | 3,024,960 |
| 2.51E-21 | 0    | 9.98E-01 | 3,037,499 |

|          |      |          |           |
|----------|------|----------|-----------|
| 2.53E-21 | 0    | 7.56E-01 | 2,962,253 |
| 2.70E-21 | 9.7  | 2.55E-01 | 3,024,133 |
| 2.70E-21 | 0    | 9.68E-01 | 3,037,499 |
| 2.77E-21 | 0    | 7.09E-01 | 3,037,499 |
| 2.88E-21 | 0    | 6.21E-01 | 3,037,499 |
| 3.09E-21 | 0    | 9.18E-01 | 3,001,141 |
| 3.19E-21 | 23.5 | 4.41E-02 | 3,035,786 |
| 3.37E-21 | 0    | 5.23E-01 | 2,996,607 |
| 3.75E-21 | 4.4  | 3.73E-01 | 3,035,786 |
| 3.94E-21 | 0    | 7.19E-01 | 3,037,499 |
| 4.12E-21 | 4.8  | 3.64E-01 | 3,033,353 |
| 4.65E-21 | 13.1 | 1.85E-01 | 3,036,585 |
| 4.70E-21 | 15.4 | 1.44E-01 | 3,024,960 |
| 4.85E-21 | 0    | 7.03E-01 | 3,034,091 |
| 4.99E-21 | 30.5 | 9.82E-03 | 3,000,868 |
| 5.01E-21 | 0    | 6.97E-01 | 3,000,868 |
| 5.44E-21 | 0    | 7.95E-01 | 3,037,499 |
| 5.54E-21 | 0.5  | 4.67E-01 | 3,037,499 |
| 6.09E-21 | 0    | 9.73E-01 | 3,035,786 |
| 6.20E-21 | 19.6 | 8.32E-02 | 3,029,493 |
| 6.47E-21 | 0    | 7.97E-01 | 3,037,499 |
| 6.78E-21 | 0    | 7.44E-01 | 3,032,611 |
| 6.84E-21 | 0    | 5.01E-01 | 3,021,983 |
| 6.90E-21 | 12.6 | 1.93E-01 | 3,035,786 |
| 7.14E-21 | 24.5 | 3.72E-02 | 3,035,066 |
| 7.55E-21 | 0    | 7.96E-01 | 3,037,499 |
| 7.84E-21 | 0    | 7.83E-01 | 3,035,786 |
| 7.89E-21 | 0    | 7.65E-01 | 3,037,499 |
| 8.13E-21 | 0    | 6.29E-01 | 3,020,755 |
| 9.10E-21 | 0    | 5.59E-01 | 3,037,499 |
| 9.70E-21 | 0    | 6.23E-01 | 3,032,883 |
| 1.00E-20 | 24.9 | 3.46E-02 | 3,035,066 |
| 1.07E-20 | 0    | 7.91E-01 | 3,036,702 |
| 1.16E-20 | 28.9 | 1.48E-02 | 3,036,955 |
| 1.23E-20 | 18.3 | 9.97E-02 | 3,034,230 |
| 1.31E-20 | 12.6 | 1.96E-01 | 3,023,247 |
| 1.32E-20 | 0    | 5.67E-01 | 3,030,007 |
| 1.38E-20 | 10   | 2.50E-01 | 3,033,316 |
| 1.41E-20 | 12   | 2.06E-01 | 3,035,786 |
| 1.41E-20 | 14.2 | 1.65E-01 | 3,036,702 |
| 1.45E-20 | 0    | 6.63E-01 | 3,037,499 |
| 1.55E-20 | 3.4  | 3.98E-01 | 3,035,786 |
| 1.57E-20 | 15.2 | 1.47E-01 | 3,000,868 |
| 1.61E-20 | 0    | 7.05E-01 | 3,037,499 |
| 1.64E-20 | 21.4 | 6.26E-02 | 3,035,786 |
| 1.86E-20 | 0    | 5.11E-01 | 3,037,499 |
| 1.89E-20 | 16.7 | 1.24E-01 | 3,033,353 |
| 1.90E-20 | 0    | 7.15E-01 | 3,037,499 |

|          |      |          |           |
|----------|------|----------|-----------|
| 1.94E-20 | 8    | 2.90E-01 | 3,035,786 |
| 1.96E-20 | 0    | 7.12E-01 | 3,018,322 |
| 1.96E-20 | 0    | 8.00E-01 | 3,036,955 |
| 1.97E-20 | 0    | 9.89E-01 | 3,036,702 |
| 2.03E-20 | 23.7 | 4.15E-02 | 3,037,499 |
| 2.03E-20 | 16.8 | 1.44E-01 | 2,997,948 |
| 2.05E-20 | 1.9  | 4.34E-01 | 3,016,253 |
| 2.14E-20 | 0    | 7.81E-01 | 3,037,499 |
| 2.20E-20 | 12.8 | 1.92E-01 | 3,035,242 |
| 2.42E-20 | 0    | 4.93E-01 | 3,032,519 |
| 2.85E-20 | 0    | 9.23E-01 | 3,037,499 |
| 2.94E-20 | 0    | 5.54E-01 | 3,000,071 |
| 3.63E-20 | 2.5  | 4.19E-01 | 3,033,316 |
| 3.81E-20 | 7.7  | 2.98E-01 | 3,034,269 |
| 4.04E-20 | 0    | 5.74E-01 | 3,037,499 |
| 4.14E-20 | 0    | 8.91E-01 | 3,036,955 |
| 4.45E-20 | 14   | 1.67E-01 | 3,037,499 |
| 4.49E-20 | 0    | 7.39E-01 | 2,954,554 |
| 4.51E-20 | 6.4  | 3.45E-01 | 2,941,322 |
| 4.67E-20 | 0    | 5.79E-01 | 3,024,960 |
| 5.49E-20 | 6.8  | 3.17E-01 | 3,036,955 |
| 5.55E-20 | 18.5 | 9.56E-02 | 3,037,499 |
| 5.61E-20 | 0    | 9.06E-01 | 3,033,353 |
| 6.59E-20 | 0    | 7.34E-01 | 3,035,679 |
| 6.60E-20 | 0    | 7.74E-01 | 3,036,702 |
| 6.77E-20 | 6.6  | 3.21E-01 | 3,037,499 |
| 6.94E-20 | 0    | 6.42E-01 | 3,036,955 |
| 7.28E-20 | 9.7  | 2.53E-01 | 3,036,702 |
| 7.57E-20 | 0    | 6.75E-01 | 3,036,702 |
| 7.67E-20 | 2    | 4.31E-01 | 3,024,960 |
| 7.96E-20 | 0    | 5.63E-01 | 3,037,499 |
| 7.98E-20 | 0    | 7.85E-01 | 3,037,499 |
| 8.47E-20 | 18.8 | 1.01E-01 | 3,025,190 |
| 8.58E-20 | 12.3 | 2.21E-01 | 3,003,726 |
| 8.64E-20 | 33.1 | 5.47E-03 | 3,033,043 |
| 8.89E-20 | 18.9 | 9.06E-02 | 3,037,499 |
| 9.08E-20 | 13.4 | 1.98E-01 | 3,008,597 |
| 1.03E-19 | 2    | 4.31E-01 | 3,022,527 |
| 1.04E-19 | 16.7 | 1.26E-01 | 3,022,209 |
| 1.14E-19 | 0    | 8.15E-01 | 3,024,960 |
| 1.16E-19 | 30.7 | 9.87E-03 | 3,034,989 |
| 1.25E-19 | 0    | 6.22E-01 | 3,035,565 |
| 1.30E-19 | 0    | 5.00E-01 | 3,036,702 |
| 1.30E-19 | 0    | 7.88E-01 | 3,012,595 |
| 1.34E-19 | 0    | 6.91E-01 | 2,991,986 |
| 1.35E-19 | 22.5 | 5.30E-02 | 3,036,702 |
| 1.50E-19 | 20.8 | 6.92E-02 | 3,035,786 |
| 1.50E-19 | 0    | 6.90E-01 | 3,036,158 |

|          |      |          |           |
|----------|------|----------|-----------|
| 1.57E-19 | 0    | 9.90E-01 | 3,026,233 |
| 1.65E-19 | 30.9 | 8.60E-03 | 3,037,499 |
| 1.69E-19 | 0    | 7.34E-01 | 3,008,261 |
| 1.74E-19 | 11.6 | 2.29E-01 | 3,020,693 |
| 1.76E-19 | 24   | 4.07E-02 | 3,036,702 |
| 1.92E-19 | 4.4  | 3.74E-01 | 3,036,702 |
| 1.94E-19 | 14.9 | 1.52E-01 | 3,036,702 |
| 2.02E-19 | 0.9  | 4.55E-01 | 3,036,955 |
| 2.14E-19 | 5.1  | 3.57E-01 | 3,037,499 |
| 2.36E-19 | 11.3 | 2.19E-01 | 3,035,786 |
| 2.40E-19 | 17.2 | 1.15E-01 | 3,035,066 |
| 2.56E-19 | 15   | 1.48E-01 | 3,037,499 |
| 2.63E-19 | 30.3 | 1.06E-02 | 3,036,702 |
| 2.79E-19 | 0    | 7.60E-01 | 3,037,499 |
| 2.81E-19 | 16.3 | 1.28E-01 | 3,035,786 |
| 2.98E-19 | 8.3  | 2.81E-01 | 3,037,499 |
| 3.18E-19 | 0    | 5.62E-01 | 3,035,066 |
| 3.21E-19 | 11.6 | 2.12E-01 | 3,037,499 |
| 3.22E-19 | 21.2 | 7.01E-02 | 3,033,943 |
| 3.28E-19 | 13.8 | 1.69E-01 | 3,037,499 |
| 3.43E-19 | 0    | 8.28E-01 | 2,713,337 |
| 3.48E-19 | 0    | 8.84E-01 | 3,012,884 |
| 3.67E-19 | 18.4 | 9.84E-02 | 3,024,960 |
| 3.75E-19 | 0    | 5.43E-01 | 3,000,765 |
| 3.81E-19 | 0    | 9.36E-01 | 3,024,960 |
| 4.03E-19 | 11.7 | 2.15E-01 | 3,034,445 |
| 4.32E-19 | 5.7  | 3.42E-01 | 3,035,786 |
| 4.66E-19 | 21.4 | 6.28E-02 | 3,031,809 |
| 4.73E-19 | 15.4 | 1.46E-01 | 3,032,035 |
| 4.76E-19 | 5.5  | 3.48E-01 | 3,035,679 |
| 4.81E-19 | 31.3 | 7.97E-03 | 3,024,960 |
| 5.12E-19 | 15.6 | 1.40E-01 | 3,000,868 |
| 5.12E-19 | 24   | 4.04E-02 | 3,035,786 |
| 5.23E-19 | 0    | 5.40E-01 | 2,997,134 |
| 5.42E-19 | 1.6  | 4.41E-01 | 3,035,786 |
| 5.59E-19 | 14.6 | 1.56E-01 | 3,037,499 |
| 5.62E-19 | 2.5  | 4.18E-01 | 3,037,499 |
| 5.69E-19 | 7.3  | 3.06E-01 | 3,036,702 |
| 5.77E-19 | 6.5  | 3.32E-01 | 3,015,239 |
| 5.88E-19 | 17.8 | 1.08E-01 | 3,033,353 |
| 6.08E-19 | 16.4 | 1.26E-01 | 3,037,499 |
| 6.21E-19 | 0    | 7.53E-01 | 3,037,499 |
| 6.65E-19 | 0    | 8.02E-01 | 3,037,499 |
| 6.68E-19 | 9.1  | 2.67E-01 | 3,036,702 |
| 6.91E-19 | 9.4  | 2.60E-01 | 3,000,868 |
| 7.03E-19 | 0    | 4.82E-01 | 3,036,702 |
| 7.10E-19 | 23.5 | 4.46E-02 | 3,035,066 |
| 7.12E-19 | 2.7  | 4.14E-01 | 2,997,814 |

|          |      |          |           |
|----------|------|----------|-----------|
| 7.15E-19 | 0    | 5.82E-01 | 3,037,499 |
| 7.16E-19 | 27.6 | 2.03E-02 | 3,034,989 |
| 7.34E-19 | 13.9 | 1.68E-01 | 3,037,499 |
| 7.85E-19 | 0    | 8.09E-01 | 3,036,702 |
| 8.62E-19 | 5.9  | 3.40E-01 | 3,016,897 |
| 9.22E-19 | 0    | 9.20E-01 | 3,036,702 |
| 1.01E-18 | 5    | 3.60E-01 | 3,036,702 |
| 1.02E-18 | 0    | 7.58E-01 | 3,037,499 |
| 1.04E-18 | 16.8 | 1.21E-01 | 3,024,960 |
| 1.06E-18 | 19.9 | 7.83E-02 | 3,037,499 |
| 1.30E-18 | 0    | 4.81E-01 | 3,036,702 |
| 1.31E-18 | 17.8 | 1.04E-01 | 3,037,499 |
| 1.31E-18 | 9.5  | 2.81E-01 | 2,950,668 |
| 1.31E-18 | 0    | 7.44E-01 | 3,036,702 |
| 1.34E-18 | 0    | 8.14E-01 | 3,021,673 |
| 1.36E-18 | 23.9 | 4.35E-02 | 3,022,450 |
| 1.40E-18 | 5.9  | 3.37E-01 | 3,037,499 |
| 1.44E-18 | 0    | 9.50E-01 | 3,037,499 |
| 1.47E-18 | 0    | 4.95E-01 | 2,859,814 |
| 1.49E-18 | 17.5 | 1.11E-01 | 3,036,702 |
| 1.50E-18 | 0    | 1.00E+00 | 2,272,216 |
| 1.51E-18 | 0    | 7.35E-01 | 3,037,499 |
| 1.54E-18 | 0    | 8.53E-01 | 3,035,679 |
| 1.62E-18 | 14   | 1.75E-01 | 3,018,870 |
| 1.91E-18 | 0    | 8.70E-01 | 3,037,499 |
| 1.92E-18 | 12.4 | 1.97E-01 | 3,035,786 |
| 1.93E-18 | 11.9 | 2.07E-01 | 3,036,702 |
| 2.01E-18 | 0    | 6.22E-01 | 3,036,702 |
| 2.06E-18 | 1.6  | 4.40E-01 | 3,028,720 |
| 2.08E-18 | 25.2 | 3.72E-02 | 3,016,631 |
| 2.10E-18 | 33.3 | 5.63E-03 | 2,993,471 |
| 2.16E-18 | 0    | 6.96E-01 | 3,036,955 |
| 2.22E-18 | 3.2  | 4.02E-01 | 3,037,499 |
| 2.25E-18 | 15.8 | 1.35E-01 | 3,037,499 |
| 2.46E-18 | 8.6  | 2.78E-01 | 3,035,066 |
| 2.56E-18 | 5.7  | 3.43E-01 | 3,037,499 |
| 2.62E-18 | 0    | 7.56E-01 | 3,019,978 |
| 2.66E-18 | 0    | 8.20E-01 | 3,037,499 |
| 2.75E-18 | 9.4  | 2.58E-01 | 3,000,868 |
| 2.79E-18 | 0    | 9.48E-01 | 3,034,989 |
| 2.84E-18 | 0    | 5.07E-01 | 3,024,073 |
| 2.88E-18 | 17.7 | 1.07E-01 | 3,037,499 |
| 2.90E-18 | 0    | 4.95E-01 | 3,037,499 |
| 3.04E-18 | 23.2 | 5.93E-02 | 2,972,635 |
| 3.11E-18 | 0    | 8.58E-01 | 3,011,162 |
| 3.15E-18 | 0    | 4.81E-01 | 2,926,925 |
| 3.45E-18 | 4.5  | 3.71E-01 | 3,037,499 |
| 3.51E-18 | 0    | 5.69E-01 | 3,036,702 |

|          |      |          |           |
|----------|------|----------|-----------|
| 3.57E-18 | 14.6 | 1.70E-01 | 3,011,790 |
| 3.58E-18 | 19.2 | 8.82E-02 | 3,024,960 |
| 3.64E-18 | 0    | 9.13E-01 | 2,920,658 |
| 3.87E-18 | 0    | 5.94E-01 | 3,034,989 |
| 3.99E-18 | 28.1 | 1.82E-02 | 3,024,163 |
| 4.01E-18 | 0    | 8.25E-01 | 3,036,702 |
| 4.03E-18 | 9    | 2.66E-01 | 3,037,499 |
| 4.09E-18 | 0    | 7.79E-01 | 3,037,499 |
| 4.39E-18 | 0    | 7.68E-01 | 3,036,702 |
| 4.86E-18 | 0    | 6.17E-01 | 3,037,499 |
| 4.94E-18 | 1.3  | 4.46E-01 | 3,035,309 |
| 5.12E-18 | 0    | 5.21E-01 | 3,036,702 |
| 5.19E-18 | 8.9  | 2.68E-01 | 3,037,499 |
| 5.37E-18 | 26.1 | 2.65E-02 | 3,037,499 |
| 5.44E-18 | 12.3 | 2.01E-01 | 3,033,966 |
| 5.75E-18 | 30   | 1.07E-02 | 3,037,499 |
| 6.06E-18 | 0    | 9.28E-01 | 2,982,627 |
| 6.07E-18 | 0    | 5.21E-01 | 3,027,125 |
| 6.12E-18 | 20.9 | 6.81E-02 | 3,035,786 |
| 6.19E-18 | 11.6 | 2.37E-01 | 2,489,376 |
| 6.37E-18 | 18.6 | 1.00E-01 | 3,033,294 |
| 6.43E-18 | 10.1 | 2.46E-01 | 3,034,269 |
| 6.50E-18 | 6.8  | 3.19E-01 | 3,030,096 |
| 6.73E-18 | 11.2 | 2.20E-01 | 3,037,499 |
| 7.03E-18 | 0    | 7.92E-01 | 3,037,499 |
| 7.18E-18 | 13.1 | 2.00E-01 | 3,005,139 |
| 7.26E-18 | 22.2 | 5.44E-02 | 3,037,499 |
| 7.37E-18 | 0    | 6.59E-01 | 3,022,468 |
| 7.66E-18 | 8.9  | 2.70E-01 | 3,031,797 |
| 7.90E-18 | 21.7 | 6.27E-02 | 3,032,524 |
| 8.22E-18 | 0    | 6.34E-01 | 3,037,499 |
| 8.78E-18 | 27.4 | 2.21E-02 | 3,034,445 |
| 8.90E-18 | 11.8 | 2.10E-01 | 3,036,702 |
| 9.06E-18 | 16.1 | 1.36E-01 | 3,030,084 |
| 9.57E-18 | 0.8  | 4.59E-01 | 3,036,702 |
| 9.61E-18 | 23.9 | 4.14E-02 | 3,035,786 |
| 9.72E-18 | 0    | 4.94E-01 | 3,037,499 |
| 9.96E-18 | 15.3 | 1.45E-01 | 3,036,702 |
| 1.08E-17 | 0    | 5.98E-01 | 3,037,499 |
| 1.08E-17 | 0    | 5.21E-01 | 3,012,599 |
| 1.10E-17 | 0    | 7.88E-01 | 3,030,433 |
| 1.15E-17 | 15.1 | 1.47E-01 | 3,037,499 |
| 1.23E-17 | 0    | 6.23E-01 | 3,036,158 |
| 1.27E-17 | 12.2 | 2.01E-01 | 3,036,702 |
| 1.27E-17 | 25.5 | 4.33E-02 | 3,007,427 |
| 1.28E-17 | 0    | 6.51E-01 | 3,037,499 |
| 1.28E-17 | 0    | 7.34E-01 | 3,034,522 |
| 1.36E-17 | 16   | 1.33E-01 | 3,037,499 |

|          |      |          |           |
|----------|------|----------|-----------|
| 1.40E-17 | 0    | 5.42E-01 | 3,037,499 |
| 1.47E-17 | 0    | 5.22E-01 | 3,032,535 |
| 1.48E-17 | 0    | 8.22E-01 | 3,036,702 |
| 1.51E-17 | 9.6  | 2.55E-01 | 3,036,702 |
| 1.56E-17 | 11.3 | 2.19E-01 | 3,035,066 |
| 1.61E-17 | 0    | 6.05E-01 | 3,037,499 |
| 1.62E-17 | 21.9 | 5.68E-02 | 3,037,499 |
| 1.70E-17 | 0.8  | 4.60E-01 | 3,036,702 |
| 1.84E-17 | 0    | 6.21E-01 | 3,037,499 |
| 1.89E-17 | 0    | 6.07E-01 | 3,037,499 |
| 1.89E-17 | 0    | 9.06E-01 | 3,033,721 |
| 1.94E-17 | 0    | 1.00E+00 | 2,272,216 |
| 1.98E-17 | 0    | 9.34E-01 | 3,036,702 |
| 1.98E-17 | 0    | 5.45E-01 | 3,036,702 |
| 1.99E-17 | 18.7 | 9.72E-02 | 3,034,445 |
| 2.03E-17 | 0    | 8.95E-01 | 3,024,960 |
| 2.03E-17 | 13.6 | 1.92E-01 | 3,002,105 |
| 2.12E-17 | 0    | 6.12E-01 | 3,037,499 |
| 2.21E-17 | 9.6  | 2.55E-01 | 3,035,066 |
| 2.24E-17 | 6.4  | 3.33E-01 | 3,014,936 |
| 2.26E-17 | 28.2 | 1.67E-02 | 3,037,499 |
| 2.27E-17 | 32.7 | 5.15E-03 | 3,037,499 |
| 2.27E-17 | 0    | 9.49E-01 | 3,037,499 |
| 2.39E-17 | 0    | 8.42E-01 | 3,020,493 |
| 2.41E-17 | 0.6  | 4.64E-01 | 3,016,894 |
| 2.42E-17 | 0    | 8.54E-01 | 3,037,499 |
| 2.53E-17 | 18.7 | 9.74E-02 | 3,034,445 |
| 2.57E-17 | 0    | 6.26E-01 | 3,013,371 |
| 2.58E-17 | 6.4  | 3.26E-01 | 3,036,702 |
| 2.60E-17 | 10   | 2.45E-01 | 3,037,499 |
| 2.75E-17 | 22.8 | 5.05E-02 | 3,036,702 |
| 2.75E-17 | 0    | 8.36E-01 | 3,037,499 |
| 2.77E-17 | 0    | 8.10E-01 | 3,037,499 |
| 2.78E-17 | 12.3 | 2.12E-01 | 3,009,011 |
| 2.86E-17 | 0    | 8.91E-01 | 3,037,499 |
| 2.89E-17 | 26.4 | 2.44E-02 | 3,037,499 |
| 2.93E-17 | 9.9  | 2.48E-01 | 3,035,786 |
| 3.09E-17 | 0    | 6.36E-01 | 3,037,499 |
| 3.12E-17 | 0    | 9.16E-01 | 3,035,786 |
| 3.13E-17 | 0    | 6.24E-01 | 3,037,499 |
| 3.17E-17 | 0    | 9.24E-01 | 3,032,556 |
| 3.78E-17 | 43.9 | 8.53E-05 | 3,027,236 |
| 3.81E-17 | 18.1 | 1.05E-01 | 3,033,371 |
| 3.88E-17 | 4.7  | 3.68E-01 | 2,995,980 |
| 3.90E-17 | 0    | 6.23E-01 | 3,033,353 |
| 3.96E-17 | 0    | 5.47E-01 | 3,019,978 |
| 3.97E-17 | 14.9 | 1.67E-01 | 3,010,771 |
| 3.99E-17 | 8.7  | 2.91E-01 | 2,993,305 |



|          |      |          |           |
|----------|------|----------|-----------|
| 4.02E-17 | 26.1 | 2.72E-02 | 3,036,702 |
| 4.04E-17 | 0    | 8.97E-01 | 3,037,499 |
| 4.09E-17 | 14.8 | 1.55E-01 | 3,034,989 |
| 4.15E-17 | 0    | 5.22E-01 | 3,031,835 |
| 4.22E-17 | 17.9 | 1.04E-01 | 3,037,499 |
| 4.25E-17 | 0    | 9.26E-01 | 3,037,499 |
| 4.27E-17 | 5.8  | 3.40E-01 | 3,032,517 |
| 4.39E-17 | 11.6 | 2.16E-01 | 3,033,043 |
| 4.40E-17 | 0    | 1.00E+00 | 2,272,216 |
| 4.69E-17 | 0    | 7.74E-01 | 3,022,377 |
| 4.77E-17 | 0    | 7.98E-01 | 3,037,499 |
| 4.78E-17 | 6.6  | 3.22E-01 | 3,037,499 |
| 4.93E-17 | 0    | 4.81E-01 | 3,035,786 |
| 4.93E-17 | 15.1 | 1.57E-01 | 3,027,208 |
| 5.10E-17 | 3.7  | 3.90E-01 | 3,034,269 |
| 5.18E-17 | 0    | 7.51E-01 | 3,036,702 |
| 5.20E-17 | 0    | 5.94E-01 | 3,036,702 |
| 5.21E-17 | 3.2  | 4.01E-01 | 3,037,499 |
| 5.22E-17 | 0    | 5.61E-01 | 3,034,989 |
| 5.23E-17 | 0    | 6.93E-01 | 3,035,786 |
| 5.55E-17 | 0    | 6.32E-01 | 3,036,702 |
| 5.62E-17 | 22.6 | 5.19E-02 | 3,036,702 |
| 5.79E-17 | 0    | 5.30E-01 | 3,036,702 |
| 5.86E-17 | 0    | 4.97E-01 | 3,037,499 |
| 5.89E-17 | 4.8  | 3.65E-01 | 3,036,702 |
| 6.18E-17 | 0    | 7.16E-01 | 3,022,253 |
| 6.50E-17 | 11.1 | 2.43E-01 | 2,999,322 |
| 6.59E-17 | 0    | 5.72E-01 | 3,037,499 |
| 6.65E-17 | 10.6 | 2.33E-01 | 3,037,499 |
| 6.82E-17 | 0    | 5.55E-01 | 3,037,499 |
| 6.83E-17 | 28.3 | 1.70E-02 | 3,035,786 |
| 6.87E-17 | 37.7 | 1.06E-03 | 3,035,679 |
| 6.90E-17 | 10.5 | 2.37E-01 | 3,034,989 |
| 7.21E-17 | 19.7 | 1.97E-01 | 2,861,455 |
| 7.24E-17 | 17.7 | 1.06E-01 | 3,037,499 |
| 7.64E-17 | 21.5 | 6.10E-02 | 3,037,499 |
| 7.74E-17 | 18.2 | 1.01E-01 | 3,036,702 |
| 7.77E-17 | 0    | 4.88E-01 | 3,031,883 |
| 7.86E-17 | 22.6 | 5.67E-02 | 3,028,649 |
| 8.25E-17 | 0    | 5.48E-01 | 3,035,786 |
| 8.31E-17 | 0.4  | 4.67E-01 | 2,999,173 |
| 8.35E-17 | 0    | 7.88E-01 | 2,997,599 |
| 8.55E-17 | 15.7 | 1.38E-01 | 3,035,786 |
| 8.70E-17 | 4.4  | 3.74E-01 | 3,035,786 |
| 8.80E-17 | 31.1 | 2.57E-02 | 2,927,240 |
| 8.81E-17 | 14.1 | 1.65E-01 | 3,037,499 |
| 9.23E-17 | 2.7  | 4.13E-01 | 3,037,499 |
| 9.31E-17 | 1    | 4.53E-01 | 2,995,624 |

|          |      |          |           |
|----------|------|----------|-----------|
| 9.90E-17 | 41.2 | 6.57E-03 | 2,942,081 |
| 1.01E-16 | 0    | 8.15E-01 | 3,035,786 |
| 1.02E-16 | 0    | 8.66E-01 | 3,002,555 |
| 1.03E-16 | 0.8  | 4.58E-01 | 3,021,729 |
| 1.05E-16 | 0    | 4.92E-01 | 3,037,499 |
| 1.06E-16 | 0    | 5.12E-01 | 3,024,960 |
| 1.10E-16 | 0    | 6.20E-01 | 3,037,499 |
| 1.10E-16 | 14.3 | 1.62E-01 | 3,035,786 |
| 1.11E-16 | 6.9  | 3.27E-01 | 2,996,181 |
| 1.12E-16 | 0    | 5.57E-01 | 3,036,691 |
| 1.14E-16 | 0    | 8.68E-01 | 3,027,390 |
| 1.17E-16 | 0.2  | 4.70E-01 | 3,000,822 |
| 1.24E-16 | 12.8 | 1.93E-01 | 3,034,445 |
| 1.26E-16 | 13.1 | 1.85E-01 | 3,036,702 |
| 1.29E-16 | 0    | 6.59E-01 | 3,031,720 |
| 1.30E-16 | 13.6 | 1.77E-01 | 3,024,163 |
| 1.33E-16 | 0    | 5.57E-01 | 2,957,190 |
| 1.33E-16 | 0    | 7.81E-01 | 3,024,163 |
| 1.34E-16 | 0    | 6.57E-01 | 3,030,433 |
| 1.35E-16 | 1.2  | 4.50E-01 | 2,985,689 |
| 1.36E-16 | 0    | 8.75E-01 | 3,036,955 |
| 1.39E-16 | 0    | 6.80E-01 | 2,972,482 |
| 1.40E-16 | 0    | 9.77E-01 | 3,036,702 |
| 1.41E-16 | 0    | 5.80E-01 | 3,037,499 |
| 1.42E-16 | 0    | 5.09E-01 | 3,029,908 |
| 1.44E-16 | 0    | 5.21E-01 | 3,010,412 |
| 1.45E-16 | 0    | 9.22E-01 | 3,035,786 |
| 1.48E-16 | 8.2  | 2.85E-01 | 3,037,499 |
| 1.52E-16 | 14.4 | 1.58E-01 | 3,037,499 |
| 1.55E-16 | 0    | 6.78E-01 | 3,037,499 |
| 1.68E-16 | 25.1 | 3.39E-02 | 3,033,353 |
| 1.69E-16 | 0    | 6.10E-01 | 3,021,691 |
| 1.70E-16 | 15   | 1.88E-01 | 2,941,529 |
| 1.71E-16 | 8.4  | 2.82E-01 | 3,020,692 |
| 1.73E-16 | 11.1 | 2.23E-01 | 3,036,702 |
| 1.74E-16 | 0    | 9.03E-01 | 3,037,499 |
| 1.75E-16 | 0    | 6.47E-01 | 3,036,702 |
| 1.89E-16 | 3    | 4.07E-01 | 3,037,499 |
| 1.91E-16 | 31.7 | 1.02E-02 | 3,011,034 |
| 1.93E-16 | 18.4 | 1.03E-01 | 3,030,822 |
| 1.95E-16 | 15.9 | 1.34E-01 | 3,036,702 |
| 1.97E-16 | 0    | 5.10E-01 | 3,036,702 |
| 2.00E-16 | 6.2  | 3.31E-01 | 3,035,786 |
| 2.01E-16 | 28   | 1.74E-02 | 3,037,499 |
| 2.09E-16 | 2.6  | 4.22E-01 | 2,968,727 |
| 2.11E-16 | 0    | 5.38E-01 | 3,032,556 |
| 2.20E-16 | 2.4  | 4.21E-01 | 3,037,499 |
| 2.20E-16 | 31.6 | 7.85E-03 | 3,035,135 |

|          |      |          |           |
|----------|------|----------|-----------|
| 2.21E-16 | 0    | 7.68E-01 | 2,986,616 |
| 2.22E-16 | 24.9 | 3.44E-02 | 3,036,702 |
| 2.32E-16 | 0    | 7.49E-01 | 3,036,702 |
| 2.36E-16 | 22.4 | 5.36E-02 | 3,036,702 |
| 2.44E-16 | 26.7 | 2.30E-02 | 3,037,499 |
| 2.53E-16 | 5.2  | 3.56E-01 | 3,031,603 |
| 2.53E-16 | 0    | 5.03E-01 | 2,998,267 |
| 2.56E-16 | 18.4 | 9.69E-02 | 3,037,499 |
| 2.60E-16 | 0    | 9.91E-01 | 3,034,989 |
| 2.74E-16 | 0    | 7.55E-01 | 3,037,499 |
| 2.80E-16 | 0    | 9.27E-01 | 3,037,499 |
| 2.85E-16 | 0    | 7.11E-01 | 3,021,691 |
| 2.86E-16 | 0    | 6.46E-01 | 3,036,702 |
| 2.91E-16 | 6.2  | 3.32E-01 | 3,031,797 |
| 2.97E-16 | 9.9  | 2.50E-01 | 3,033,120 |
| 3.04E-16 | 9.4  | 2.61E-01 | 3,035,009 |
| 3.10E-16 | 19.5 | 8.37E-02 | 3,036,702 |
| 3.10E-16 | 0    | 5.92E-01 | 3,037,499 |
| 3.13E-16 | 20.5 | 7.13E-02 | 3,037,499 |
| 3.44E-16 | 14.8 | 1.52E-01 | 3,037,499 |
| 3.57E-16 | 3.2  | 4.03E-01 | 2,305,237 |
| 3.62E-16 | 0    | 5.23E-01 | 3,018,473 |
| 3.71E-16 | 14.9 | 1.57E-01 | 3,031,370 |
| 3.72E-16 | 5.9  | 3.38E-01 | 3,037,499 |
| 3.74E-16 | 0    | 6.95E-01 | 3,037,499 |
| 3.90E-16 | 17.8 | 1.05E-01 | 3,037,499 |
| 3.98E-16 | 14.6 | 1.56E-01 | 3,037,499 |
| 4.00E-16 | 0    | 6.84E-01 | 3,035,242 |
| 4.05E-16 | 0    | 8.91E-01 | 3,035,066 |
| 4.06E-16 | 11.2 | 2.23E-01 | 3,036,666 |
| 4.06E-16 | 2.7  | 4.14E-01 | 3,031,883 |
| 4.12E-16 | 0    | 8.27E-01 | 3,037,499 |
| 4.15E-16 | 0    | 6.62E-01 | 3,037,499 |
| 4.29E-16 | 0    | 5.26E-01 | 3,037,499 |
| 4.34E-16 | 0    | 4.96E-01 | 3,037,499 |
| 4.36E-16 | 0    | 5.74E-01 | 3,035,786 |
| 4.40E-16 | 4.1  | 3.80E-01 | 3,037,499 |
| 4.55E-16 | 28.3 | 1.63E-02 | 3,037,499 |
| 4.60E-16 | 24.7 | 3.59E-02 | 3,035,786 |
| 4.69E-16 | 11.7 | 2.09E-01 | 3,037,499 |
| 4.87E-16 | 0    | 6.94E-01 | 3,022,360 |
| 4.87E-16 | 9.1  | 2.78E-01 | 3,024,881 |
| 4.94E-16 | 6.8  | 3.17E-01 | 3,036,955 |
| 5.09E-16 | 0    | 8.06E-01 | 2,713,337 |
| 5.19E-16 | 2.4  | 4.20E-01 | 3,034,989 |
| 5.21E-16 | 38.4 | 1.21E-02 | 2,935,371 |
| 5.21E-16 | 0    | 5.22E-01 | 747,801   |
| 5.26E-16 | 4.4  | 3.74E-01 | 3,035,786 |

|          |      |          |           |
|----------|------|----------|-----------|
| 5.34E-16 | 26.2 | 2.99E-02 | 3,021,338 |
| 5.40E-16 | 0    | 5.49E-01 | 3,037,499 |
| 5.59E-16 | 30.6 | 1.57E-02 | 3,000,298 |
| 5.69E-16 | 0    | 9.87E-01 | 3,015,944 |
| 5.69E-16 | 0    | 6.23E-01 | 3,037,499 |
| 5.76E-16 | 0    | 1.00E+00 | 2,272,216 |
| 5.79E-16 | 4.8  | 3.65E-01 | 2,999,155 |
| 5.83E-16 | 0    | 9.33E-01 | 3,036,702 |
| 5.84E-16 | 15.3 | 2.14E-01 | 2,907,813 |
| 5.88E-16 | 0    | 8.13E-01 | 3,036,702 |
| 6.04E-16 | 11.8 | 2.08E-01 | 3,036,702 |
| 6.28E-16 | 0    | 6.34E-01 | 3,037,499 |
| 6.32E-16 | 0    | 6.84E-01 | 3,035,786 |
| 6.35E-16 | 0    | 7.02E-01 | 3,035,786 |
| 6.42E-16 | 0    | 5.62E-01 | 3,023,014 |
| 6.69E-16 | 7.8  | 2.94E-01 | 3,037,499 |
| 6.97E-16 | 0    | 4.81E-01 | 3,032,457 |
| 6.97E-16 | 0    | 5.86E-01 | 3,035,786 |
| 6.99E-16 | 20.9 | 7.08E-02 | 3,029,636 |
| 7.04E-16 | 0    | 4.99E-01 | 3,034,269 |
| 7.49E-16 | 18.1 | 1.01E-01 | 3,037,499 |
| 7.64E-16 | 1.3  | 4.48E-01 | 3,023,619 |
| 7.77E-16 | 0    | 6.23E-01 | 3,037,499 |
| 7.87E-16 | 16.7 | 1.21E-01 | 3,037,499 |
| 7.96E-16 | 12.5 | 1.97E-01 | 3,033,353 |
| 7.97E-16 | 15.3 | 1.55E-01 | 3,018,205 |
| 8.09E-16 | 26.7 | 2.30E-02 | 3,037,499 |
| 8.12E-16 | 0    | 7.43E-01 | 3,033,733 |
| 8.18E-16 | 0    | 6.98E-01 | 2,942,958 |
| 8.50E-16 | 27.1 | 2.11E-02 | 3,037,499 |
| 9.00E-16 | 8.7  | 2.73E-01 | 3,037,499 |
| 9.03E-16 | 21.6 | 6.50E-02 | 3,032,416 |
| 9.48E-16 | 2.7  | 4.12E-01 | 3,037,499 |
| 9.84E-16 | 0    | 7.06E-01 | 2,861,270 |
| 1.01E-15 | 10.9 | 2.26E-01 | 3,037,499 |
| 1.01E-15 | 0    | 5.55E-01 | 3,029,170 |
| 1.05E-15 | 0    | 4.84E-01 | 3,036,702 |
| 1.09E-15 | 0    | 6.15E-01 | 3,035,786 |
| 1.09E-15 | 0    | 5.24E-01 | 3,033,316 |
| 1.10E-15 | 4.5  | 3.79E-01 | 3,005,114 |
| 1.11E-15 | 33.8 | 4.22E-03 | 3,034,756 |
| 1.13E-15 | 9    | 2.67E-01 | 3,037,499 |
| 1.19E-15 | 4.8  | 3.71E-01 | 3,001,966 |
| 1.19E-15 | 6    | 3.36E-01 | 3,036,955 |
| 1.22E-15 | 0    | 8.73E-01 | 3,034,989 |
| 1.26E-15 | 36   | 8.60E-03 | 2,992,266 |
| 1.28E-15 | 0    | 9.48E-01 | 3,037,499 |
| 1.28E-15 | 20.6 | 7.20E-02 | 3,036,702 |

|          |      |          |           |
|----------|------|----------|-----------|
| 1.31E-15 | 10.8 | 2.29E-01 | 3,035,786 |
| 1.35E-15 | 18   | 1.03E-01 | 3,037,499 |
| 1.40E-15 | 0    | 8.89E-01 | 3,035,786 |
| 1.44E-15 | 0    | 8.32E-01 | 2,995,612 |
| 1.46E-15 | 4.8  | 3.64E-01 | 3,037,499 |
| 1.49E-15 | 0    | 5.24E-01 | 3,037,499 |
| 1.50E-15 | 6.8  | 3.22E-01 | 3,028,860 |
| 1.50E-15 | 2.5  | 4.18E-01 | 3,037,499 |
| 1.53E-15 | 0    | 6.16E-01 | 3,037,499 |
| 1.53E-15 | 0    | 7.06E-01 | 3,037,499 |
| 1.58E-15 | 0    | 4.99E-01 | 3,000,868 |
| 1.62E-15 | 23.6 | 6.37E-02 | 3,003,683 |
| 1.62E-15 | 0    | 6.46E-01 | 3,036,702 |
| 1.73E-15 | 10.5 | 2.36E-01 | 3,035,553 |
| 1.75E-15 | 10.1 | 2.46E-01 | 3,034,899 |
| 1.76E-15 | 0    | 8.18E-01 | 3,036,702 |
| 1.84E-15 | 0    | 6.28E-01 | 2,877,931 |
| 1.87E-15 | 15.9 | 1.35E-01 | 3,036,702 |
| 1.92E-15 | 0    | 5.86E-01 | 3,036,702 |
| 1.94E-15 | 0    | 5.20E-01 | 3,035,786 |
| 1.96E-15 | 0    | 9.79E-01 | 3,037,499 |
| 1.96E-15 | 15.6 | 1.39E-01 | 3,024,960 |
| 1.98E-15 | 7.1  | 3.10E-01 | 3,035,786 |
| 1.99E-15 | 17.6 | 1.17E-01 | 3,028,079 |
| 2.09E-15 | 23.6 | 5.02E-02 | 3,024,191 |
| 2.12E-15 | 0    | 6.98E-01 | 3,031,370 |
| 2.12E-15 | 0    | 6.15E-01 | 3,029,636 |
| 2.19E-15 | 7.3  | 3.06E-01 | 3,036,702 |
| 2.27E-15 | 14.1 | 1.68E-01 | 3,035,242 |
| 2.27E-15 | 3.3  | 4.00E-01 | 3,033,353 |
| 2.32E-15 | 0    | 5.50E-01 | 3,021,008 |
| 2.34E-15 | 8.6  | 2.77E-01 | 3,034,989 |
| 2.40E-15 | 0    | 9.05E-01 | 3,033,862 |
| 2.45E-15 | 24.7 | 3.67E-02 | 3,024,163 |
| 2.46E-15 | 11.1 | 2.23E-01 | 3,035,786 |
| 2.56E-15 | 0    | 4.97E-01 | 2,550,944 |
| 2.60E-15 | 0    | 8.64E-01 | 3,037,499 |
| 2.62E-15 | 16.6 | 1.28E-01 | 3,018,708 |
| 2.64E-15 | 0    | 6.48E-01 | 3,021,528 |
| 2.67E-15 | 0    | 7.25E-01 | 3,035,786 |
| 2.73E-15 | 9.6  | 2.68E-01 | 3,023,394 |
| 2.76E-15 | 0    | 8.82E-01 | 3,037,499 |
| 2.77E-15 | 0    | 6.25E-01 | 3,037,499 |
| 2.77E-15 | 0    | 9.59E-01 | 3,035,553 |
| 2.84E-15 | 0    | 7.06E-01 | 3,037,499 |
| 2.90E-15 | 9.2  | 2.63E-01 | 3,037,499 |
| 2.99E-15 | 0    | 5.17E-01 | 3,036,158 |
| 3.03E-15 | 10   | 2.46E-01 | 3,036,702 |

|          |      |          |           |
|----------|------|----------|-----------|
| 3.03E-15 | 5    | 3.60E-01 | 3,036,702 |
| 3.03E-15 | 22   | 5.74E-02 | 3,000,868 |
| 3.06E-15 | 0    | 8.97E-01 | 3,037,499 |
| 3.22E-15 | 14.3 | 1.60E-01 | 3,037,499 |
| 3.31E-15 | 12.9 | 1.93E-01 | 3,016,658 |
| 3.35E-15 | 0    | 5.69E-01 | 3,035,786 |
| 3.39E-15 | 0    | 6.92E-01 | 3,024,960 |
| 3.39E-15 | 21.3 | 8.35E-02 | 2,988,360 |
| 3.42E-15 | 34.7 | 4.55E-03 | 3,012,857 |
| 3.48E-15 | 0    | 5.92E-01 | 3,015,570 |
| 3.56E-15 | 30.5 | 9.89E-03 | 3,031,883 |
| 3.57E-15 | 18.8 | 9.16E-02 | 3,037,499 |
| 3.58E-15 | 0    | 6.76E-01 | 3,036,702 |
| 3.66E-15 | 0    | 8.87E-01 | 3,021,719 |
| 3.74E-15 | 0    | 5.90E-01 | 3,029,372 |
| 3.80E-15 | 19.8 | 9.00E-02 | 3,013,631 |
| 3.84E-15 | 3.5  | 3.93E-01 | 3,037,499 |
| 3.85E-15 | 8.9  | 2.70E-01 | 3,036,585 |
| 3.89E-15 | 0    | 5.00E-01 | 2,981,124 |
| 3.92E-15 | 0    | 7.55E-01 | 3,037,499 |
| 3.96E-15 | 0    | 6.60E-01 | 3,037,499 |
| 4.01E-15 | 0    | 9.86E-01 | 3,020,814 |
| 4.08E-15 | 20.5 | 7.10E-02 | 3,037,499 |
| 4.09E-15 | 8.7  | 2.75E-01 | 3,035,786 |
| 4.12E-15 | 16.3 | 1.27E-01 | 3,037,499 |
| 4.33E-15 | 0    | 4.89E-01 | 3,037,499 |
| 4.40E-15 | 0    | 8.84E-01 | 3,036,702 |
| 4.48E-15 | 0    | 8.31E-01 | 3,036,702 |
| 4.64E-15 | 10.4 | 2.40E-01 | 3,017,631 |
| 4.70E-15 | 4.8  | 3.64E-01 | 3,036,702 |
| 4.87E-15 | 26.5 | 2.59E-02 | 3,035,804 |
| 4.90E-15 | 0    | 9.52E-01 | 3,037,499 |
| 4.93E-15 | 0    | 5.41E-01 | 3,037,499 |
| 5.58E-15 | 0    | 9.72E-01 | 3,036,702 |
| 5.59E-15 | 21.9 | 6.18E-02 | 3,021,319 |
| 5.75E-15 | 0    | 8.15E-01 | 3,035,786 |
| 5.78E-15 | 0    | 6.67E-01 | 3,033,353 |
| 5.80E-15 | 0    | 7.42E-01 | 3,024,960 |
| 5.84E-15 | 0.8  | 4.58E-01 | 3,036,702 |
| 6.03E-15 | 0    | 4.92E-01 | 3,037,499 |
| 6.44E-15 | 7.5  | 3.02E-01 | 3,036,702 |
| 6.51E-15 | 0    | 6.00E-01 | 3,036,955 |
| 6.63E-15 | 0    | 5.01E-01 | 3,035,786 |
| 6.64E-15 | 26.2 | 2.67E-02 | 3,034,230 |
| 6.79E-15 | 2.4  | 4.21E-01 | 3,035,786 |
| 6.83E-15 | 3.7  | 3.89E-01 | 3,037,499 |
| 7.06E-15 | 0    | 7.04E-01 | 3,037,499 |
| 7.07E-15 | 10.9 | 2.25E-01 | 3,037,499 |

|          |      |          |           |
|----------|------|----------|-----------|
| 7.12E-15 | 0    | 5.27E-01 | 3,036,702 |
| 7.23E-15 | 1.5  | 4.42E-01 | 3,034,978 |
| 7.35E-15 | 18.5 | 9.54E-02 | 3,037,499 |
| 7.66E-15 | 0    | 8.24E-01 | 3,036,702 |
| 7.69E-15 | 14.9 | 1.51E-01 | 3,037,499 |
| 7.78E-15 | 0    | 7.24E-01 | 3,029,493 |
| 7.80E-15 | 21.9 | 5.80E-02 | 3,000,868 |
| 7.89E-15 | 0    | 5.55E-01 | 3,027,780 |
| 7.91E-15 | 0    | 6.54E-01 | 3,035,786 |
| 8.01E-15 | 13   | 1.85E-01 | 3,037,499 |
| 8.07E-15 | 0    | 5.19E-01 | 3,017,312 |
| 8.23E-15 | 0    | 4.98E-01 | 3,035,786 |
| 8.29E-15 | 7.5  | 3.02E-01 | 3,036,702 |
| 8.36E-15 | 9.1  | 2.67E-01 | 3,036,158 |
| 8.38E-15 | 16.6 | 1.26E-01 | 3,036,585 |
| 8.84E-15 | 0    | 9.11E-01 | 3,033,238 |
| 8.94E-15 | 0    | 6.31E-01 | 3,036,702 |
| 9.08E-15 | 9    | 2.67E-01 | 3,037,499 |
| 9.20E-15 | 0    | 5.54E-01 | 3,000,868 |
| 9.22E-15 | 0    | 8.03E-01 | 3,036,702 |
| 9.22E-15 | 0    | 6.26E-01 | 2,514,295 |
| 9.48E-15 | 17.2 | 1.14E-01 | 3,037,499 |
| 9.51E-15 | 17.7 | 1.11E-01 | 2,996,722 |
| 9.64E-15 | 6.6  | 3.31E-01 | 3,005,865 |
| 9.65E-15 | 1.1  | 4.52E-01 | 3,031,658 |
| 9.74E-15 | 13   | 1.86E-01 | 3,035,066 |
| 1.01E-14 | 15.4 | 1.47E-01 | 3,035,470 |
| 1.02E-14 | 34   | 3.69E-03 | 3,035,786 |
| 1.07E-14 | 26.7 | 4.31E-02 | 2,977,628 |
| 1.07E-14 | 4    | 3.84E-01 | 3,036,702 |
| 1.07E-14 | 1.4  | 4.45E-01 | 3,000,071 |
| 1.08E-14 | 23.5 | 4.35E-02 | 3,037,499 |
| 1.09E-14 | 0    | 6.19E-01 | 3,036,702 |
| 1.09E-14 | 0.5  | 4.65E-01 | 3,037,499 |
| 1.12E-14 | 0    | 6.87E-01 | 3,036,702 |
| 1.13E-14 | 14.3 | 1.60E-01 | 3,037,499 |
| 1.13E-14 | 0    | 6.08E-01 | 3,025,021 |
| 1.17E-14 | 39.9 | 3.16E-02 | 2,856,936 |
| 1.24E-14 | 0    | 5.82E-01 | 3,037,499 |
| 1.25E-14 | 10.6 | 2.41E-01 | 3,018,322 |
| 1.25E-14 | 0    | 8.72E-01 | 3,037,499 |
| 1.26E-14 | 2    | 4.31E-01 | 3,021,552 |
| 1.26E-14 | 0    | 5.64E-01 | 3,037,499 |
| 1.26E-14 | 7.3  | 3.07E-01 | 3,034,989 |
| 1.33E-14 | 13.5 | 2.68E-01 | 2,844,528 |
| 1.33E-14 | 0    | 6.11E-01 | 3,030,433 |
| 1.33E-14 | 8.7  | 2.73E-01 | 3,037,499 |
| 1.34E-14 | 0    | 9.63E-01 | 3,037,499 |

|          |      |          |           |
|----------|------|----------|-----------|
| 1.40E-14 | 13.1 | 1.89E-01 | 3,033,294 |
| 1.41E-14 | 0    | 7.25E-01 | 3,020,514 |
| 1.43E-14 | 10.2 | 2.54E-01 | 3,001,684 |
| 1.47E-14 | 17.8 | 1.04E-01 | 3,037,499 |
| 1.51E-14 | 3.6  | 3.91E-01 | 3,035,553 |
| 1.52E-14 | 14.3 | 1.67E-01 | 3,033,721 |
| 1.56E-14 | 0    | 6.38E-01 | 2,999,301 |
| 1.62E-14 | 0    | 5.42E-01 | 3,034,957 |
| 1.72E-14 | 0    | 4.97E-01 | 3,036,702 |
| 1.75E-14 | 12.6 | 2.09E-01 | 3,020,159 |
| 1.76E-14 | 19.1 | 8.91E-02 | 3,035,553 |
| 1.79E-14 | 11.8 | 2.29E-01 | 2,993,106 |
| 1.80E-14 | 0    | 9.25E-01 | 3,034,989 |
| 1.82E-14 | 15.6 | 1.40E-01 | 3,035,786 |
| 1.83E-14 | 0    | 7.85E-01 | 3,010,654 |
| 1.86E-14 | 0    | 7.17E-01 | 3,036,158 |
| 1.88E-14 | 7.9  | 2.91E-01 | 3,037,499 |
| 1.89E-14 | 0    | 7.26E-01 | 3,036,702 |
| 1.89E-14 | 0    | 9.33E-01 | 3,037,499 |
| 1.89E-14 | 0    | 6.11E-01 | 3,019,927 |
| 1.98E-14 | 0    | 4.83E-01 | 3,037,499 |
| 1.98E-14 | 0    | 5.78E-01 | 3,037,499 |
| 1.99E-14 | 0    | 7.65E-01 | 3,031,487 |
| 2.02E-14 | 0    | 7.54E-01 | 3,011,328 |
| 2.07E-14 | 0    | 9.59E-01 | 2,993,329 |
| 2.10E-14 | 0    | 7.08E-01 | 3,037,499 |
| 2.12E-14 | 29.4 | 1.41E-02 | 3,030,969 |
| 2.14E-14 | 8.9  | 2.69E-01 | 3,037,499 |
| 2.22E-14 | 0    | 7.25E-01 | 3,036,702 |
| 2.22E-14 | 0    | 5.91E-01 | 3,034,989 |
| 2.31E-14 | 0    | 9.18E-01 | 3,035,786 |
| 2.32E-14 | 10.8 | 2.29E-01 | 3,037,499 |
| 2.35E-14 | 0    | 8.94E-01 | 3,035,786 |
| 2.35E-14 | 0    | 5.58E-01 | 3,037,499 |
| 2.45E-14 | 2.1  | 4.28E-01 | 3,036,384 |
| 2.46E-14 | 25.9 | 2.93E-02 | 3,024,163 |
| 2.49E-14 | 11.9 | 2.07E-01 | 3,036,702 |
| 2.53E-14 | 7.5  | 3.00E-01 | 3,035,786 |
| 2.54E-14 | 0    | 5.60E-01 | 3,020,017 |
| 2.56E-14 | 12.9 | 1.93E-01 | 3,030,272 |
| 2.56E-14 | 0    | 7.68E-01 | 3,037,499 |
| 2.59E-14 | 21.1 | 6.71E-02 | 3,033,353 |
| 2.61E-14 | 11   | 2.31E-01 | 3,019,119 |
| 2.62E-14 | 14.4 | 1.59E-01 | 3,037,499 |
| 2.62E-14 | 0    | 5.08E-01 | 3,037,499 |
| 2.71E-14 | 0    | 8.40E-01 | 2,999,527 |
| 2.75E-14 | 17.2 | 1.14E-01 | 3,037,499 |
| 2.76E-14 | 0    | 6.69E-01 | 3,037,499 |



|          |      |          |           |
|----------|------|----------|-----------|
| 2.77E-14 | 3.7  | 3.92E-01 | 3,031,603 |
| 2.83E-14 | 3.3  | 3.99E-01 | 3,033,840 |
| 2.83E-14 | 0    | 5.04E-01 | 3,015,850 |
| 2.84E-14 | 0    | 9.60E-01 | 3,036,702 |
| 2.88E-14 | 1.4  | 4.45E-01 | 3,034,522 |
| 2.90E-14 | 0    | 6.21E-01 | 3,034,091 |
| 2.92E-14 | 2.5  | 4.22E-01 | 2,970,796 |
| 2.94E-14 | 9.1  | 2.67E-01 | 3,035,242 |
| 2.96E-14 | 16.8 | 1.21E-01 | 3,035,671 |
| 2.97E-14 | 7.8  | 2.94E-01 | 3,035,786 |
| 3.02E-14 | 4.7  | 3.66E-01 | 3,037,499 |
| 3.04E-14 | 0    | 7.06E-01 | 3,037,499 |
| 3.06E-14 | 30.2 | 2.88E-02 | 2,973,418 |
| 3.07E-14 | 30.4 | 1.05E-02 | 3,036,158 |
| 3.09E-14 | 18   | 1.02E-01 | 3,037,499 |
| 3.10E-14 | 14.3 | 1.65E-01 | 3,018,547 |
| 3.12E-14 | 15.8 | 1.47E-01 | 3,025,128 |
| 3.14E-14 | 0    | 5.13E-01 | 3,012,358 |
| 3.16E-14 | 25.1 | 3.21E-02 | 3,037,499 |
| 3.17E-14 | 18.7 | 9.22E-02 | 3,037,499 |
| 3.17E-14 | 0    | 1.00E+00 | 2,272,216 |
| 3.22E-14 | 7.4  | 3.04E-01 | 3,035,786 |
| 3.22E-14 | 0    | 8.21E-01 | 3,035,786 |
| 3.23E-14 | 0    | 7.07E-01 | 3,034,989 |
| 3.30E-14 | 8.2  | 2.85E-01 | 3,037,499 |
| 3.30E-14 | 25.1 | 3.69E-02 | 3,026,131 |
| 3.35E-14 | 14.4 | 1.61E-01 | 3,034,756 |
| 3.43E-14 | 0    | 7.18E-01 | 3,037,499 |
| 3.43E-14 | 22   | 5.57E-02 | 3,037,499 |
| 3.45E-14 | 12.6 | 1.94E-01 | 3,035,786 |
| 3.48E-14 | 17.9 | 1.04E-01 | 3,036,702 |
| 3.51E-14 | 0    | 6.76E-01 | 3,037,499 |
| 3.52E-14 | 43.1 | 1.06E-04 | 3,036,612 |
| 3.74E-14 | 14.1 | 1.68E-01 | 3,033,371 |
| 3.75E-14 | 9.1  | 2.69E-01 | 3,031,525 |
| 3.78E-14 | 0    | 6.63E-01 | 3,037,499 |
| 3.87E-14 | 24.9 | 5.97E-02 | 2,987,530 |
| 3.90E-14 | 0    | 6.15E-01 | 3,037,499 |
| 3.91E-14 | 0    | 6.36E-01 | 3,024,960 |
| 3.93E-14 | 0    | 6.91E-01 | 3,037,499 |
| 4.00E-14 | 0.2  | 4.72E-01 | 2,966,669 |
| 4.06E-14 | 16   | 1.33E-01 | 3,000,868 |
| 4.08E-14 | 2.7  | 4.15E-01 | 3,024,163 |
| 4.13E-14 | 0    | 9.43E-01 | 3,012,675 |
| 4.19E-14 | 18.9 | 9.16E-02 | 3,036,702 |
| 4.21E-14 | 14.1 | 1.66E-01 | 3,036,702 |
| 4.24E-14 | 10.3 | 2.40E-01 | 3,034,230 |
| 4.42E-14 | 23.2 | 4.71E-02 | 3,000,868 |

|          |      |          |           |
|----------|------|----------|-----------|
| 4.43E-14 | 11.3 | 2.17E-01 | 3,037,499 |
| 4.49E-14 | 0    | 5.78E-01 | 2,983,947 |
| 4.55E-14 | 0    | 8.34E-01 | 3,037,499 |
| 4.56E-14 | 0    | 5.65E-01 | 3,034,268 |
| 4.60E-14 | 0    | 9.62E-01 | 3,037,499 |
| 4.62E-14 | 0    | 9.05E-01 | 3,027,224 |
| 4.66E-14 | 0    | 9.09E-01 | 3,034,463 |
| 4.68E-14 | 5.3  | 3.55E-01 | 3,016,514 |
| 4.70E-14 | 0    | 8.23E-01 | 3,035,679 |
| 4.70E-14 | 27.6 | 1.92E-02 | 3,037,499 |
| 4.72E-14 | 0    | 5.13E-01 | 3,002,850 |
| 4.73E-14 | 0    | 6.47E-01 | 3,034,989 |
| 4.75E-14 | 0    | 6.47E-01 | 3,012,985 |
| 4.75E-14 | 10.1 | 2.45E-01 | 3,034,989 |
| 4.89E-14 | 14.4 | 1.59E-01 | 3,035,786 |
| 4.94E-14 | 12.2 | 2.03E-01 | 3,034,989 |
| 4.95E-14 | 26.7 | 2.39E-02 | 3,036,702 |
| 4.98E-14 | 15.3 | 1.46E-01 | 3,023,247 |
| 4.99E-14 | 6.1  | 3.33E-01 | 3,036,702 |
| 5.03E-14 | 0    | 8.02E-01 | 3,037,499 |
| 5.06E-14 | 11.1 | 2.22E-01 | 3,037,499 |
| 5.08E-14 | 0    | 5.19E-01 | 3,001,034 |
| 5.12E-14 | 0    | 5.29E-01 | 3,037,499 |
| 5.14E-14 | 0    | 6.30E-01 | 3,020,814 |
| 5.18E-14 | 0    | 8.59E-01 | 3,036,702 |
| 5.21E-14 | 8.5  | 3.12E-01 | 2,966,709 |
| 5.31E-14 | 0    | 6.56E-01 | 3,037,499 |
| 5.35E-14 | 29.4 | 1.30E-02 | 3,024,960 |
| 5.36E-14 | 0    | 6.70E-01 | 2,957,734 |
| 5.37E-14 | 0    | 6.45E-01 | 3,036,955 |
| 5.38E-14 | 8.6  | 2.83E-01 | 3,028,804 |
| 5.39E-14 | 16.9 | 1.23E-01 | 3,034,152 |
| 5.51E-14 | 0    | 9.26E-01 | 3,037,499 |
| 5.53E-14 | 1.2  | 4.48E-01 | 3,032,012 |
| 5.58E-14 | 12.1 | 2.06E-01 | 3,027,780 |
| 5.61E-14 | 21.5 | 6.10E-02 | 3,037,499 |
| 5.68E-14 | 23.2 | 4.78E-02 | 3,032,832 |
| 5.68E-14 | 0    | 5.73E-01 | 3,029,534 |
| 5.71E-14 | 0    | 9.06E-01 | 3,023,265 |
| 5.75E-14 | 0    | 5.94E-01 | 3,035,786 |
| 5.76E-14 | 0    | 8.49E-01 | 2,932,262 |
| 5.95E-14 | 14.5 | 1.58E-01 | 3,036,702 |
| 6.01E-14 | 0    | 6.91E-01 | 3,020,638 |
| 6.15E-14 | 3.4  | 3.98E-01 | 3,036,702 |
| 6.16E-14 | 0    | 7.91E-01 | 3,037,499 |
| 6.16E-14 | 2.7  | 4.14E-01 | 3,032,145 |
| 6.37E-14 | 7.2  | 3.09E-01 | 3,036,702 |
| 6.39E-14 | 4.4  | 3.73E-01 | 3,036,670 |

|          |      |          |           |
|----------|------|----------|-----------|
| 6.41E-14 | 0    | 7.67E-01 | 3,037,499 |
| 6.48E-14 | 9.5  | 2.55E-01 | 3,037,499 |
| 6.50E-14 | 0    | 8.80E-01 | 3,036,702 |
| 6.50E-14 | 0    | 1.00E+00 | 2,272,216 |
| 6.55E-14 | 0    | 8.69E-01 | 3,037,499 |
| 6.64E-14 | 22.5 | 6.56E-02 | 3,001,400 |
| 6.67E-14 | 9    | 2.92E-01 | 2,928,256 |
| 6.67E-14 | 0.8  | 4.57E-01 | 2,988,329 |
| 6.69E-14 | 0    | 5.27E-01 | 3,020,814 |
| 6.78E-14 | 0    | 8.27E-01 | 3,028,766 |
| 6.78E-14 | 28.8 | 3.76E-02 | 2,203,822 |
| 6.83E-14 | 0    | 1.00E+00 | 2,272,216 |
| 7.00E-14 | 0    | 9.75E-01 | 3,036,702 |
| 7.07E-14 | 0.8  | 4.58E-01 | 3,026,917 |
| 7.10E-14 | 6.8  | 3.16E-01 | 3,037,499 |
| 7.21E-14 | 0    | 6.56E-01 | 3,020,755 |
| 7.28E-14 | 0    | 7.29E-01 | 3,037,499 |
| 7.50E-14 | 0    | 5.68E-01 | 3,037,499 |
| 7.59E-14 | 0    | 6.13E-01 | 3,024,960 |
| 7.59E-14 | 25.2 | 3.14E-02 | 3,037,499 |
| 7.73E-14 | 23   | 4.96E-02 | 3,022,527 |
| 8.06E-14 | 0    | 4.96E-01 | 3,024,960 |
| 8.30E-14 | 28.5 | 1.69E-02 | 3,036,158 |
| 8.74E-14 | 0    | 1.00E+00 | 2,272,216 |
| 8.75E-14 | 23.4 | 4.62E-02 | 3,034,989 |
| 8.77E-14 | 0    | 9.29E-01 | 3,037,499 |
| 9.03E-14 | 7.3  | 3.07E-01 | 3,000,868 |
| 9.05E-14 | 0    | 5.88E-01 | 3,026,336 |
| 9.08E-14 | 0    | 5.30E-01 | 3,034,362 |
| 9.09E-14 | 5.2  | 3.54E-01 | 3,037,499 |
| 9.14E-14 | 0    | 9.97E-01 | 3,037,499 |
| 9.33E-14 | 11.1 | 2.26E-01 | 3,020,814 |
| 9.38E-14 | 10.4 | 2.36E-01 | 3,037,499 |
| 9.70E-14 | 25.7 | 2.84E-02 | 3,037,499 |
| 9.71E-14 | 9.4  | 2.84E-01 | 2,939,663 |
| 9.97E-14 | 6.5  | 3.24E-01 | 3,037,499 |
| 1.00E-13 | 4.9  | 3.62E-01 | 3,036,691 |
| 1.01E-13 | 0    | 5.58E-01 | 3,035,786 |
| 1.03E-13 | 1.7  | 4.39E-01 | 3,034,989 |
| 1.04E-13 | 4.3  | 3.84E-01 | 2,993,095 |
| 1.07E-13 | 11.9 | 2.20E-01 | 3,013,439 |
| 1.08E-13 | 0    | 7.37E-01 | 3,037,499 |
| 1.10E-13 | 0    | 6.92E-01 | 3,037,499 |
| 1.13E-13 | 17.6 | 1.07E-01 | 3,037,499 |
| 1.13E-13 | 0    | 5.02E-01 | 3,037,499 |
| 1.13E-13 | 2.7  | 4.13E-01 | 3,037,499 |
| 1.14E-13 | 0    | 6.77E-01 | 2,555,644 |
| 1.17E-13 | 15.9 | 1.66E-01 | 3,002,713 |

|          |      |          |           |
|----------|------|----------|-----------|
| 1.17E-13 | 0    | 4.82E-01 | 3,037,499 |
| 1.19E-13 | 27.1 | 2.14E-02 | 3,037,499 |
| 1.19E-13 | 0    | 5.93E-01 | 3,037,499 |
| 1.19E-13 | 11.8 | 2.08E-01 | 3,037,499 |
| 1.20E-13 | 15.9 | 1.40E-01 | 3,031,370 |
| 1.22E-13 | 4.7  | 3.69E-01 | 2,991,601 |
| 1.27E-13 | 0    | 9.35E-01 | 3,037,499 |
| 1.28E-13 | 0    | 7.88E-01 | 3,034,269 |
| 1.28E-13 | 5.1  | 3.68E-01 | 3,004,863 |
| 1.29E-13 | 0    | 7.18E-01 | 3,019,869 |
| 1.29E-13 | 16.3 | 1.28E-01 | 3,037,499 |
| 1.29E-13 | 12.5 | 1.95E-01 | 3,000,868 |
| 1.29E-13 | 18.5 | 9.90E-02 | 3,023,247 |
| 1.34E-13 | 0    | 9.28E-01 | 3,037,499 |
| 1.36E-13 | 0.5  | 4.64E-01 | 2,953,283 |
| 1.36E-13 | 5.2  | 3.54E-01 | 3,036,702 |
| 1.39E-13 | 19.1 | 8.93E-02 | 3,036,702 |
| 1.39E-13 | 1.4  | 4.45E-01 | 3,037,499 |
| 1.40E-13 | 13.4 | 1.82E-01 | 3,034,091 |
| 1.41E-13 | 1    | 4.53E-01 | 3,036,955 |
| 1.42E-13 | 0    | 9.10E-01 | 3,024,416 |
| 1.47E-13 | 0    | 4.99E-01 | 3,035,883 |
| 1.47E-13 | 6.9  | 3.13E-01 | 3,037,499 |
| 1.48E-13 | 0    | 8.76E-01 | 3,023,247 |
| 1.50E-13 | 0    | 7.58E-01 | 3,034,989 |
| 1.50E-13 | 0    | 5.52E-01 | 3,037,499 |
| 1.51E-13 | 0    | 6.21E-01 | 3,013,418 |
| 1.52E-13 | 0    | 5.00E-01 | 3,035,786 |
| 1.52E-13 | 0    | 9.99E-01 | 3,036,702 |
| 1.53E-13 | 15.5 | 1.45E-01 | 3,020,814 |
| 1.54E-13 | 17.1 | 1.15E-01 | 3,037,499 |
| 1.56E-13 | 15.3 | 1.45E-01 | 3,036,702 |
| 1.57E-13 | 27.8 | 2.24E-02 | 3,009,694 |
| 1.58E-13 | 0    | 7.79E-01 | 3,036,702 |
| 1.60E-13 | 0    | 5.15E-01 | 3,032,012 |
| 1.62E-13 | 18.8 | 9.76E-02 | 3,033,144 |
| 1.64E-13 | 7.3  | 3.08E-01 | 3,019,181 |
| 1.65E-13 | 0    | 8.27E-01 | 3,035,242 |
| 1.65E-13 | 1.6  | 4.41E-01 | 3,024,960 |
| 1.69E-13 | 5.2  | 3.54E-01 | 3,037,499 |
| 1.70E-13 | 0    | 5.07E-01 | 752,744   |
| 1.70E-13 | 22.9 | 4.77E-02 | 3,037,499 |
| 1.72E-13 | 1.5  | 4.43E-01 | 3,037,499 |
| 1.73E-13 | 3.2  | 4.01E-01 | 3,020,814 |
| 1.74E-13 | 24.6 | 3.80E-02 | 3,033,316 |
| 1.83E-13 | 26.7 | 2.34E-02 | 3,037,499 |
| 1.83E-13 | 10.4 | 2.35E-01 | 3,037,499 |
| 1.83E-13 | 0    | 5.69E-01 | 3,037,499 |

|          |      |          |           |
|----------|------|----------|-----------|
| 1.85E-13 | 3.4  | 3.96E-01 | 3,037,499 |
| 1.86E-13 | 0    | 8.31E-01 | 3,036,702 |
| 1.90E-13 | 0    | 9.73E-01 | 3,037,499 |
| 1.94E-13 | 0    | 6.34E-01 | 3,037,499 |
| 1.95E-13 | 15   | 1.49E-01 | 3,037,499 |
| 1.96E-13 | 15.8 | 1.61E-01 | 3,000,214 |
| 1.96E-13 | 18   | 1.04E-01 | 3,036,702 |
| 1.97E-13 | 0    | 9.49E-01 | 3,035,184 |
| 1.97E-13 | 7.7  | 2.95E-01 | 3,037,499 |
| 2.00E-13 | 0    | 9.17E-01 | 2,934,266 |
| 2.00E-13 | 6.7  | 3.19E-01 | 3,036,702 |
| 2.01E-13 | 0    | 8.58E-01 | 3,030,571 |
| 2.01E-13 | 23.3 | 4.68E-02 | 3,036,158 |
| 2.02E-13 | 1.5  | 4.42E-01 | 3,037,499 |
| 2.02E-13 | 53.1 | 1.44E-01 | 2,713,337 |
| 2.03E-13 | 0    | 5.71E-01 | 3,034,989 |
| 2.05E-13 | 0    | 5.63E-01 | 3,035,786 |
| 2.06E-13 | 13.8 | 1.79E-01 | 3,011,159 |
| 2.06E-13 | 0    | 7.06E-01 | 3,036,702 |
| 2.09E-13 | 0    | 9.45E-01 | 3,014,503 |
| 2.10E-13 | 1.5  | 4.41E-01 | 3,036,702 |
| 2.11E-13 | 5.7  | 3.45E-01 | 3,034,978 |
| 2.12E-13 | 9.6  | 2.67E-01 | 3,000,016 |
| 2.13E-13 | 17   | 1.21E-01 | 3,035,788 |
| 2.25E-13 | 12.1 | 2.04E-01 | 3,035,786 |
| 2.25E-13 | 4.8  | 3.63E-01 | 3,036,955 |
| 2.30E-13 | 6    | 3.35E-01 | 3,036,955 |
| 2.34E-13 | 4.8  | 3.69E-01 | 3,009,486 |
| 2.35E-13 | 12.7 | 1.93E-01 | 3,034,989 |
| 2.38E-13 | 20.6 | 1.43E-01 | 2,938,260 |
| 2.38E-13 | 18.6 | 9.61E-02 | 3,036,955 |
| 2.39E-13 | 0    | 6.93E-01 | 3,035,786 |
| 2.39E-13 | 0    | 8.52E-01 | 3,000,868 |
| 2.51E-13 | 23.7 | 4.58E-02 | 3,031,603 |
| 2.54E-13 | 0    | 9.11E-01 | 3,020,293 |
| 2.62E-13 | 0    | 5.30E-01 | 3,037,499 |
| 2.66E-13 | 4    | 3.82E-01 | 3,037,499 |
| 2.66E-13 | 0    | 6.32E-01 | 3,036,702 |
| 2.67E-13 | 4.9  | 3.60E-01 | 3,037,499 |
| 2.68E-13 | 0    | 7.03E-01 | 3,036,585 |
| 2.72E-13 | 0    | 7.78E-01 | 2,939,886 |
| 2.72E-13 | 1.2  | 4.49E-01 | 3,036,702 |
| 2.73E-13 | 34.9 | 2.68E-03 | 3,037,499 |
| 2.74E-13 | 4.5  | 3.72E-01 | 3,036,702 |
| 2.78E-13 | 17.1 | 1.15E-01 | 3,037,499 |
| 2.81E-13 | 1.3  | 4.47E-01 | 2,948,860 |
| 2.81E-13 | 0    | 9.97E-01 | 3,037,499 |
| 2.83E-13 | 29.7 | 1.17E-02 | 3,037,499 |

|          |      |          |           |
|----------|------|----------|-----------|
| 2.84E-13 | 9.5  | 2.57E-01 | 3,037,499 |
| 2.87E-13 | 6.2  | 3.31E-01 | 3,035,786 |
| 2.90E-13 | 7.8  | 2.94E-01 | 3,037,499 |
| 2.91E-13 | 0    | 6.27E-01 | 3,037,499 |
| 2.98E-13 | 9.7  | 2.52E-01 | 3,035,066 |
| 3.01E-13 | 3.5  | 3.95E-01 | 3,037,499 |
| 3.05E-13 | 4.4  | 3.74E-01 | 3,036,702 |
| 3.08E-13 | 0    | 5.35E-01 | 3,034,989 |
| 3.16E-13 | 30.4 | 1.01E-02 | 3,035,553 |
| 3.20E-13 | 0    | 7.03E-01 | 3,018,651 |
| 3.25E-13 | 17.3 | 1.16E-01 | 3,033,548 |
| 3.28E-13 | 0    | 8.08E-01 | 3,036,702 |
| 3.32E-13 | 0    | 4.87E-01 | 3,035,553 |
| 3.36E-13 | 0    | 5.72E-01 | 2,930,601 |
| 3.37E-13 | 22.1 | 5.63E-02 | 3,036,955 |
| 3.38E-13 | 0    | 7.21E-01 | 3,037,499 |
| 3.41E-13 | 6.3  | 3.52E-01 | 2,970,554 |
| 3.54E-13 | 28.7 | 1.85E-02 | 3,007,768 |
| 3.56E-13 | 0    | 8.07E-01 | 3,036,702 |
| 3.62E-13 | 10.3 | 2.40E-01 | 3,035,786 |
| 3.63E-13 | 0.9  | 4.57E-01 | 3,035,553 |
| 3.67E-13 | 0    | 6.11E-01 | 3,037,499 |
| 3.67E-13 | 0    | 5.10E-01 | 3,035,009 |
| 3.78E-13 | 0    | 8.52E-01 | 3,035,786 |
| 3.79E-13 | 19.3 | 9.15E-02 | 3,020,832 |
| 3.80E-13 | 0    | 6.36E-01 | 3,036,702 |
| 3.84E-13 | 0    | 5.41E-01 | 3,030,806 |
| 3.84E-13 | 37.6 | 1.06E-02 | 2,923,185 |
| 3.87E-13 | 0.5  | 4.66E-01 | 3,037,499 |
| 3.87E-13 | 15.9 | 1.59E-01 | 2,997,226 |
| 3.88E-13 | 0    | 5.25E-01 | 2,987,024 |
| 3.90E-13 | 0    | 6.20E-01 | 3,036,702 |
| 3.91E-13 | 0    | 7.80E-01 | 3,035,066 |
| 3.97E-13 | 7.2  | 3.08E-01 | 3,036,702 |
| 4.04E-13 | 0    | 6.48E-01 | 3,018,322 |
| 4.08E-13 | 0    | 5.56E-01 | 3,036,702 |
| 4.14E-13 | 14.5 | 2.11E-01 | 2,927,738 |
| 4.17E-13 | 0.4  | 4.67E-01 | 3,036,702 |
| 4.22E-13 | 48.6 | 4.21E-06 | 3,036,702 |
| 4.26E-13 | 16.8 | 1.22E-01 | 3,034,269 |
| 4.31E-13 | 0    | 9.37E-01 | 3,033,353 |
| 4.31E-13 | 0    | 6.41E-01 | 3,034,989 |
| 4.32E-13 | 0    | 6.60E-01 | 3,037,499 |
| 4.43E-13 | 25.2 | 5.73E-02 | 2,978,331 |
| 4.49E-13 | 6    | 3.35E-01 | 3,037,499 |
| 4.49E-13 | 0    | 9.10E-01 | 3,023,247 |
| 4.57E-13 | 0    | 9.70E-01 | 3,037,499 |
| 4.57E-13 | 41.9 | 1.90E-04 | 3,035,786 |

|          |      |          |           |
|----------|------|----------|-----------|
| 4.61E-13 | 19.9 | 7.76E-02 | 3,037,499 |
| 4.61E-13 | 9.2  | 2.64E-01 | 3,036,158 |
| 4.70E-13 | 14.2 | 1.67E-01 | 3,030,084 |
| 4.73E-13 | 0    | 9.57E-01 | 3,037,499 |
| 4.73E-13 | 0    | 7.80E-01 | 3,036,702 |
| 4.75E-13 | 0    | 5.79E-01 | 3,035,786 |
| 4.76E-13 | 0    | 7.15E-01 | 3,030,969 |
| 5.01E-13 | 0    | 7.47E-01 | 3,034,989 |
| 5.03E-13 | 0    | 6.49E-01 | 3,037,499 |
| 5.05E-13 | 0.1  | 4.75E-01 | 3,024,163 |
| 5.07E-13 | 10.2 | 2.43E-01 | 2,583,839 |
| 5.18E-13 | 0    | 9.75E-01 | 3,036,702 |
| 5.19E-13 | 10.8 | 2.50E-01 | 2,993,340 |
| 5.22E-13 | 21.4 | 8.22E-02 | 3,001,466 |
| 5.26E-13 | 10.8 | 2.29E-01 | 3,037,499 |
| 5.31E-13 | 0    | 9.93E-01 | 3,026,107 |
| 5.39E-13 | 28.1 | 1.89E-02 | 3,034,445 |
| 5.42E-13 | 0    | 9.16E-01 | 2,996,722 |
| 5.47E-13 | 0    | 5.29E-01 | 3,037,499 |
| 5.53E-13 | 0    | 6.37E-01 | 3,012,696 |
| 5.54E-13 | 0    | 6.91E-01 | 3,036,702 |
| 5.56E-13 | 0    | 5.46E-01 | 3,034,091 |
| 5.59E-13 | 3.2  | 4.02E-01 | 3,036,702 |
| 5.80E-13 | 0    | 7.64E-01 | 3,037,499 |
| 5.86E-13 | 14.3 | 1.63E-01 | 3,036,702 |
| 5.91E-13 | 26.3 | 2.96E-02 | 3,019,199 |
| 5.94E-13 | 0    | 5.73E-01 | 3,035,786 |
| 6.03E-13 | 8.1  | 3.39E-01 | 2,921,488 |
| 6.18E-13 | 0    | 5.88E-01 | 3,033,353 |
| 6.20E-13 | 11.1 | 2.25E-01 | 3,034,989 |
| 6.26E-13 | 6.6  | 3.29E-01 | 3,016,582 |
| 6.30E-13 | 25.5 | 2.96E-02 | 3,037,499 |
| 6.39E-13 | 0    | 7.73E-01 | 3,037,499 |
| 6.46E-13 | 7.1  | 3.10E-01 | 3,037,499 |
| 6.48E-13 | 0    | 9.58E-01 | 2,995,770 |
| 6.52E-13 | 0    | 8.88E-01 | 2,981,675 |
| 6.54E-13 | 0    | 8.22E-01 | 3,022,821 |
| 6.59E-13 | 7.3  | 3.06E-01 | 3,037,499 |
| 6.59E-13 | 12.4 | 2.02E-01 | 3,033,294 |
| 6.71E-13 | 0.7  | 4.61E-01 | 3,009,187 |
| 6.78E-13 | 0    | 5.25E-01 | 3,035,786 |
| 6.98E-13 | 19.1 | 9.05E-02 | 3,023,247 |
| 6.99E-13 | 0    | 9.83E-01 | 3,036,702 |
| 7.09E-13 | 0    | 9.94E-01 | 3,034,989 |
| 7.12E-13 | 15.7 | 1.37E-01 | 3,037,499 |
| 7.25E-13 | 18.1 | 1.02E-01 | 3,035,553 |
| 7.25E-13 | 4.6  | 3.68E-01 | 3,037,499 |
| 7.32E-13 | 0    | 5.67E-01 | 3,036,702 |

|          |      |          |           |
|----------|------|----------|-----------|
| 7.51E-13 | 0    | 8.95E-01 | 3,036,702 |
| 7.52E-13 | 0    | 7.66E-01 | 2,995,551 |
| 7.56E-13 | 16.3 | 1.26E-01 | 3,037,499 |
| 7.57E-13 | 0    | 4.86E-01 | 2,963,084 |
| 7.62E-13 | 16.4 | 1.29E-01 | 2,988,329 |
| 7.74E-13 | 0    | 6.71E-01 | 3,036,702 |
| 7.76E-13 | 8.4  | 2.96E-01 | 2,995,470 |
| 7.80E-13 | 18.3 | 1.05E-01 | 3,031,658 |
| 7.90E-13 | 0    | 5.17E-01 | 3,024,960 |
| 7.97E-13 | 0    | 7.43E-01 | 3,032,406 |
| 8.11E-13 | 40.2 | 7.30E-02 | 2,824,517 |
| 8.37E-13 | 4.5  | 3.70E-01 | 3,035,786 |
| 8.37E-13 | 0    | 7.75E-01 | 3,036,702 |
| 8.42E-13 | 7.3  | 3.04E-01 | 3,037,499 |
| 8.49E-13 | 3.5  | 3.95E-01 | 3,035,786 |
| 8.82E-13 | 0    | 5.57E-01 | 3,037,499 |
| 8.83E-13 | 6.4  | 3.31E-01 | 3,014,270 |
| 8.96E-13 | 0    | 6.62E-01 | 3,037,499 |
| 9.09E-13 | 33.9 | 2.33E-02 | 2,909,043 |
| 9.13E-13 | 0    | 8.93E-01 | 3,036,702 |
| 9.27E-13 | 0    | 9.83E-01 | 2,542,385 |
| 9.37E-13 | 0    | 6.81E-01 | 3,023,728 |
| 9.42E-13 | 0    | 5.17E-01 | 3,024,163 |
| 9.47E-13 | 16.6 | 1.23E-01 | 3,036,702 |
| 9.60E-13 | 10.7 | 2.30E-01 | 3,037,499 |
| 9.72E-13 | 18   | 1.80E-01 | 2,937,432 |
| 9.75E-13 | 19   | 9.16E-02 | 3,000,324 |
| 9.76E-13 | 0    | 8.31E-01 | 3,030,060 |
| 9.79E-13 | 0    | 7.71E-01 | 3,035,786 |
| 9.87E-13 | 0    | 6.73E-01 | 3,037,499 |
| 9.93E-13 | 7.9  | 2.96E-01 | 3,025,232 |
| 9.98E-13 | 24.3 | 4.18E-02 | 3,021,552 |
| 9.99E-13 | 11.2 | 2.22E-01 | 3,036,955 |
| 1.00E-12 | 15.9 | 1.34E-01 | 3,037,499 |
| 1.00E-12 | 0    | 5.71E-01 | 3,008,234 |
| 1.04E-12 | 0    | 8.35E-01 | 3,037,129 |
| 1.04E-12 | 10.5 | 2.38E-01 | 3,034,445 |
| 1.05E-12 | 0    | 5.74E-01 | 3,037,499 |
| 1.06E-12 | 0    | 1.00E+00 | 2,272,216 |
| 1.08E-12 | 0    | 8.25E-01 | 3,012,534 |
| 1.08E-12 | 7.4  | 3.04E-01 | 3,037,499 |
| 1.09E-12 | 23.7 | 4.39E-02 | 3,024,073 |
| 1.10E-12 | 9.4  | 2.64E-01 | 3,018,598 |
| 1.10E-12 | 16.7 | 1.23E-01 | 3,035,553 |
| 1.11E-12 | 14.8 | 1.52E-01 | 3,037,499 |
| 1.11E-12 | 33.4 | 2.30E-02 | 2,940,822 |
| 1.13E-12 | 0    | 9.31E-01 | 3,037,499 |
| 1.14E-12 | 5.1  | 3.60E-01 | 3,030,322 |



|          |      |          |           |
|----------|------|----------|-----------|
| 1.14E-12 | 0    | 4.97E-01 | 2,596,378 |
| 1.15E-12 | 0    | 9.25E-01 | 3,037,499 |
| 1.17E-12 | 21.5 | 6.43E-02 | 3,020,814 |
| 1.19E-12 | 18   | 1.03E-01 | 3,036,702 |
| 1.19E-12 | 0    | 5.49E-01 | 3,037,499 |
| 1.20E-12 | 0.7  | 4.60E-01 | 3,037,499 |
| 1.22E-12 | 0    | 9.57E-01 | 3,037,499 |
| 1.22E-12 | 27.4 | 1.99E-02 | 3,037,499 |
| 1.25E-12 | 6.9  | 3.14E-01 | 3,037,499 |
| 1.27E-12 | 0    | 7.24E-01 | 3,021,983 |
| 1.28E-12 | 7.9  | 2.91E-01 | 3,037,499 |
| 1.30E-12 | 0    | 8.08E-01 | 3,027,923 |
| 1.30E-12 | 23.5 | 4.30E-02 | 3,037,499 |
| 1.31E-12 | 0.2  | 4.73E-01 | 3,037,499 |
| 1.35E-12 | 34.5 | 3.34E-03 | 2,999,155 |
| 1.35E-12 | 0    | 6.64E-01 | 3,037,499 |
| 1.38E-12 | 16.3 | 1.27E-01 | 3,037,499 |
| 1.38E-12 | 30.9 | 8.97E-03 | 3,035,553 |
| 1.40E-12 | 0    | 7.62E-01 | 2,937,208 |
| 1.43E-12 | 0    | 7.72E-01 | 3,033,353 |
| 1.46E-12 | 0    | 5.60E-01 | 3,037,499 |
| 1.46E-12 | 16.5 | 1.25E-01 | 3,037,499 |
| 1.49E-12 | 10.9 | 2.26E-01 | 3,037,499 |
| 1.49E-12 | 23.4 | 4.65E-02 | 3,034,269 |
| 1.50E-12 | 0    | 7.85E-01 | 3,037,499 |
| 1.52E-12 | 0    | 5.34E-01 | 3,019,258 |
| 1.54E-12 | 16.7 | 1.23E-01 | 3,036,955 |
| 1.54E-12 | 94.4 | 2.39E-05 | 2,713,337 |
| 1.54E-12 | 0    | 8.10E-01 | 3,036,702 |
| 1.57E-12 | 0.4  | 4.68E-01 | 3,035,066 |
| 1.59E-12 | 0    | 6.28E-01 | 3,037,499 |
| 1.59E-12 | 0    | 8.72E-01 | 3,033,353 |
| 1.61E-12 | 0    | 6.37E-01 | 3,037,499 |
| 1.62E-12 | 0    | 4.94E-01 | 3,037,499 |
| 1.63E-12 | 0    | 5.49E-01 | 3,036,158 |
| 1.64E-12 | 21.1 | 6.54E-02 | 3,037,499 |
| 1.68E-12 | 0    | 9.59E-01 | 3,037,499 |
| 1.68E-12 | 23   | 6.01E-02 | 2,515,110 |
| 1.69E-12 | 32   | 7.05E-03 | 3,024,416 |
| 1.69E-12 | 5    | 3.60E-01 | 3,034,989 |
| 1.70E-12 | 13.8 | 1.73E-01 | 3,034,989 |
| 1.71E-12 | 11.7 | 2.10E-01 | 3,037,499 |
| 1.74E-12 | 10.1 | 2.43E-01 | 3,037,499 |
| 1.77E-12 | 0    | 6.91E-01 | 3,010,343 |
| 1.79E-12 | 15.4 | 1.42E-01 | 3,037,499 |
| 1.80E-12 | 0    | 1.00E+00 | 2,272,216 |
| 1.82E-12 | 0    | 6.17E-01 | 2,953,182 |
| 1.85E-12 | 0    | 5.36E-01 | 3,037,499 |

|          |      |          |           |
|----------|------|----------|-----------|
| 1.86E-12 | 0    | 7.28E-01 | 3,037,499 |
| 1.86E-12 | 2.9  | 4.10E-01 | 3,035,804 |
| 1.88E-12 | 25.4 | 3.05E-02 | 3,037,499 |
| 1.89E-12 | 27.4 | 2.06E-02 | 3,036,702 |
| 1.90E-12 | 28.3 | 2.01E-02 | 3,032,500 |
| 1.92E-12 | 11.1 | 2.48E-01 | 2,998,605 |
| 1.96E-12 | 1.3  | 4.47E-01 | 3,036,702 |
| 1.98E-12 | 15.7 | 1.38E-01 | 3,035,786 |
| 2.05E-12 | 0    | 4.87E-01 | 3,037,499 |
| 2.10E-12 | 5.3  | 3.59E-01 | 3,013,654 |
| 2.10E-12 | 0    | 8.70E-01 | 2,999,671 |
| 2.11E-12 | 0    | 9.79E-01 | 2,828,732 |
| 2.11E-12 | 14.5 | 1.57E-01 | 3,037,499 |
| 2.13E-12 | 0.1  | 4.73E-01 | 3,019,089 |
| 2.15E-12 | 0.5  | 4.67E-01 | 3,033,353 |
| 2.15E-12 | 18.3 | 9.83E-02 | 3,037,499 |
| 2.16E-12 | 4    | 3.88E-01 | 3,009,890 |
| 2.19E-12 | 0    | 5.75E-01 | 2,999,155 |
| 2.20E-12 | 23.4 | 6.24E-02 | 3,005,599 |
| 2.22E-12 | 0    | 8.38E-01 | 3,037,499 |
| 2.22E-12 | 11.2 | 2.22E-01 | 3,036,158 |
| 2.23E-12 | 0    | 9.92E-01 | 3,020,480 |
| 2.26E-12 | 5.5  | 3.48E-01 | 3,036,955 |
| 2.26E-12 | 2.9  | 4.08E-01 | 3,037,499 |
| 2.28E-12 | 14.2 | 1.64E-01 | 3,036,702 |
| 2.28E-12 | 13.4 | 1.79E-01 | 3,022,527 |
| 2.30E-12 | 0    | 5.22E-01 | 3,035,880 |
| 2.32E-12 | 0    | 4.92E-01 | 3,021,621 |
| 2.32E-12 | 16.6 | 1.27E-01 | 3,029,851 |
| 2.33E-12 | 0    | 5.64E-01 | 3,035,786 |
| 2.34E-12 | 17.9 | 1.23E-01 | 2,997,590 |
| 2.36E-12 | 0    | 8.79E-01 | 3,035,786 |
| 2.37E-12 | 14.3 | 1.60E-01 | 3,037,499 |
| 2.38E-12 | 0    | 4.99E-01 | 3,034,899 |
| 2.40E-12 | 0.2  | 4.73E-01 | 3,037,499 |
| 2.44E-12 | 3.9  | 3.87E-01 | 3,020,270 |
| 2.45E-12 | 21.1 | 6.52E-02 | 3,037,499 |
| 2.46E-12 | 5.3  | 3.53E-01 | 3,035,786 |
| 2.48E-12 | 29.4 | 2.11E-02 | 3,008,597 |
| 2.48E-12 | 12.5 | 2.31E-01 | 2,977,538 |
| 2.50E-12 | 3.2  | 4.03E-01 | 3,021,613 |
| 2.50E-12 | 26.5 | 2.58E-02 | 3,024,416 |
| 2.51E-12 | 0    | 6.37E-01 | 3,037,499 |
| 2.53E-12 | 33.9 | 4.00E-03 | 3,035,242 |
| 2.56E-12 | 11   | 2.31E-01 | 3,019,119 |
| 2.63E-12 | 0    | 9.62E-01 | 3,023,247 |
| 2.65E-12 | 17.6 | 1.08E-01 | 3,037,499 |
| 2.66E-12 | 5.5  | 3.47E-01 | 3,036,702 |

|          |      |          |           |
|----------|------|----------|-----------|
| 2.68E-12 | 1.6  | 4.40E-01 | 3,024,960 |
| 2.69E-12 | 0    | 6.61E-01 | 3,008,141 |
| 2.76E-12 | 16.9 | 1.34E-01 | 2,962,499 |
| 2.78E-12 | 21.2 | 6.90E-02 | 3,020,017 |
| 2.81E-12 | 0    | 5.14E-01 | 3,036,702 |
| 2.84E-12 | 54.4 | 1.39E-01 | 2,713,337 |
| 2.86E-12 | 6.7  | 3.20E-01 | 3,024,960 |
| 2.87E-12 | 0    | 7.45E-01 | 2,964,417 |
| 2.87E-12 | 12.2 | 2.00E-01 | 3,037,499 |
| 2.89E-12 | 8.5  | 2.78E-01 | 3,035,786 |
| 2.89E-12 | 1    | 4.53E-01 | 3,037,499 |
| 2.93E-12 | 0    | 8.73E-01 | 2,415,424 |
| 2.97E-12 | 25.1 | 3.28E-02 | 3,035,786 |
| 2.99E-12 | 16.2 | 1.40E-01 | 3,023,742 |
| 3.02E-12 | 12.6 | 1.98E-01 | 3,030,172 |
| 3.04E-12 | 17   | 1.17E-01 | 3,037,499 |
| 3.06E-12 | 22   | 5.72E-02 | 3,036,702 |
| 3.10E-12 | 2.1  | 4.27E-01 | 3,037,499 |
| 3.11E-12 | 14.1 | 1.66E-01 | 3,036,702 |
| 3.11E-12 | 22.8 | 4.90E-02 | 3,037,499 |
| 3.12E-12 | 9    | 2.71E-01 | 3,020,270 |
| 3.16E-12 | 12   | 2.04E-01 | 3,037,499 |
| 3.16E-12 | 9.9  | 2.49E-01 | 3,035,786 |
| 3.20E-12 | 0    | 6.70E-01 | 3,036,702 |
| 3.22E-12 | 10.5 | 2.34E-01 | 3,037,499 |
| 3.24E-12 | 0    | 4.89E-01 | 3,037,499 |
| 3.25E-12 | 11.9 | 2.06E-01 | 3,037,499 |
| 3.32E-12 | 14.9 | 1.51E-01 | 3,035,066 |
| 3.38E-12 | 0.8  | 4.59E-01 | 3,033,316 |
| 3.46E-12 | 1.4  | 4.46E-01 | 3,033,246 |
| 3.47E-12 | 0    | 4.90E-01 | 3,037,499 |
| 3.53E-12 | 0    | 4.96E-01 | 3,016,631 |
| 3.54E-12 | 9    | 2.70E-01 | 3,032,466 |
| 3.62E-12 | 15.7 | 1.51E-01 | 3,010,591 |
| 3.67E-12 | 13.9 | 1.72E-01 | 3,032,556 |
| 3.69E-12 | 2.8  | 4.16E-01 | 2,944,941 |
| 3.70E-12 | 4.3  | 3.76E-01 | 2,999,155 |
| 3.75E-12 | 20.8 | 7.18E-02 | 3,022,703 |
| 3.78E-12 | 4.3  | 3.77E-01 | 3,023,132 |
| 3.82E-12 | 0    | 5.76E-01 | 3,037,499 |
| 3.86E-12 | 4.4  | 3.74E-01 | 3,035,786 |
| 3.88E-12 | 4.7  | 3.67E-01 | 3,037,499 |
| 3.89E-12 | 0.4  | 4.67E-01 | 3,035,786 |
| 3.93E-12 | 20.9 | 6.68E-02 | 3,037,499 |
| 3.97E-12 | 0    | 8.17E-01 | 3,036,955 |
| 4.07E-12 | 7.8  | 2.94E-01 | 3,037,499 |
| 4.17E-12 | 0    | 7.57E-01 | 2,987,853 |
| 4.17E-12 | 0    | 1.00E+00 | 2,272,216 |

|          |      |          |           |
|----------|------|----------|-----------|
| 4.22E-12 | 0    | 7.21E-01 | 3,034,989 |
| 4.27E-12 | 0    | 5.77E-01 | 2,999,527 |
| 4.29E-12 | 22.7 | 5.01E-02 | 3,037,499 |
| 4.33E-12 | 10.7 | 2.61E-01 | 2,979,057 |
| 4.33E-12 | 5.8  | 3.46E-01 | 3,014,386 |
| 4.35E-12 | 0    | 6.10E-01 | 2,971,883 |
| 4.35E-12 | 16.9 | 1.20E-01 | 3,036,702 |
| 4.36E-12 | 0    | 8.00E-01 | 3,036,612 |
| 4.47E-12 | 25.8 | 2.80E-02 | 3,037,499 |
| 4.48E-12 | 1.8  | 4.35E-01 | 3,036,702 |
| 4.50E-12 | 0    | 7.89E-01 | 3,036,702 |
| 4.53E-12 | 22.8 | 5.22E-02 | 3,035,777 |
| 4.57E-12 | 0    | 6.16E-01 | 3,030,468 |
| 4.58E-12 | 0    | 1.00E+00 | 2,272,216 |
| 4.59E-12 | 11.6 | 2.11E-01 | 3,037,499 |
| 4.66E-12 | 7.3  | 3.05E-01 | 3,037,499 |
| 4.66E-12 | 4.9  | 3.63E-01 | 3,020,832 |
| 4.67E-12 | 5    | 3.70E-01 | 2,998,509 |
| 4.70E-12 | 4.7  | 3.66E-01 | 3,035,679 |
| 4.71E-12 | 0    | 7.97E-01 | 3,031,869 |
| 4.75E-12 | 19.7 | 8.18E-02 | 3,000,868 |
| 4.77E-12 | 0    | 5.13E-01 | 3,037,499 |
| 4.79E-12 | 0    | 9.71E-01 | 3,037,499 |
| 4.79E-12 | 0    | 9.41E-01 | 3,030,900 |
| 4.80E-12 | 4.1  | 3.79E-01 | 3,037,499 |
| 4.85E-12 | 0    | 9.92E-01 | 3,026,263 |
| 4.92E-12 | 4.4  | 3.73E-01 | 3,037,499 |
| 4.96E-12 | 2.1  | 4.28E-01 | 3,037,499 |
| 5.01E-12 | 14.4 | 1.60E-01 | 3,036,702 |
| 5.03E-12 | 17.1 | 2.05E-01 | 2,927,325 |
| 5.07E-12 | 0    | 1.00E+00 | 2,272,216 |
| 5.07E-12 | 7.5  | 3.17E-01 | 2,995,547 |
| 5.08E-12 | 20   | 1.12E-01 | 2,960,796 |
| 5.09E-12 | 0    | 1.00E+00 | 2,272,216 |
| 5.24E-12 | 20.8 | 6.95E-02 | 3,036,955 |
| 5.27E-12 | 0.2  | 4.72E-01 | 3,035,786 |
| 5.31E-12 | 6    | 3.35E-01 | 3,036,702 |
| 5.35E-12 | 0    | 8.72E-01 | 3,036,955 |
| 5.36E-12 | 0    | 9.03E-01 | 3,035,786 |
| 5.37E-12 | 0    | 7.48E-01 | 3,034,756 |
| 5.37E-12 | 0    | 9.19E-01 | 3,037,499 |
| 5.42E-12 | 0    | 4.94E-01 | 3,035,786 |
| 5.44E-12 | 0    | 8.79E-01 | 3,036,702 |
| 5.45E-12 | 11.4 | 2.16E-01 | 3,037,499 |
| 5.48E-12 | 19   | 1.43E-01 | 2,979,914 |
| 5.49E-12 | 19.2 | 8.60E-02 | 3,037,499 |
| 5.54E-12 | 15.9 | 1.46E-01 | 3,017,363 |
| 5.54E-12 | 2.1  | 4.28E-01 | 3,037,499 |

|          |      |          |           |
|----------|------|----------|-----------|
| 5.55E-12 | 0    | 8.70E-01 | 3,020,932 |
| 5.55E-12 | 0    | 5.90E-01 | 3,037,499 |
| 5.60E-12 | 0    | 9.67E-01 | 3,037,499 |
| 5.64E-12 | 25.9 | 3.81E-02 | 3,008,821 |
| 5.65E-12 | 0    | 9.58E-01 | 3,035,786 |
| 5.77E-12 | 0    | 9.64E-01 | 3,037,499 |
| 5.90E-12 | 0    | 8.11E-01 | 3,037,499 |
| 5.98E-12 | 33.5 | 1.81E-02 | 2,954,233 |
| 6.04E-12 | 0    | 8.50E-01 | 3,037,499 |
| 6.04E-12 | 10   | 2.47E-01 | 3,024,960 |
| 6.07E-12 | 0.1  | 4.74E-01 | 3,024,536 |
| 6.07E-12 | 2.5  | 4.21E-01 | 3,024,030 |
| 6.11E-12 | 0    | 6.96E-01 | 3,037,499 |
| 6.18E-12 | 28.6 | 1.81E-02 | 3,019,473 |
| 6.19E-12 | 16.8 | 1.25E-01 | 3,034,000 |
| 6.21E-12 | 0    | 6.62E-01 | 3,037,499 |
| 6.26E-12 | 10.8 | 2.28E-01 | 3,037,499 |
| 6.32E-12 | 26.8 | 5.94E-02 | 2,963,980 |
| 6.37E-12 | 0    | 5.06E-01 | 2,938,399 |
| 6.39E-12 | 0    | 5.10E-01 | 3,037,499 |
| 6.45E-12 | 0    | 8.42E-01 | 3,036,702 |
| 6.46E-12 | 7.1  | 3.10E-01 | 3,037,499 |
| 6.56E-12 | 20.3 | 7.58E-02 | 3,035,242 |
| 6.59E-12 | 9.5  | 2.60E-01 | 3,030,272 |
| 6.71E-12 | 0    | 6.64E-01 | 2,931,139 |
| 6.76E-12 | 0    | 9.36E-01 | 3,035,786 |
| 6.89E-12 | 6.9  | 3.14E-01 | 3,037,499 |
| 6.98E-12 | 11.2 | 2.26E-01 | 3,032,416 |
| 7.04E-12 | 0    | 7.91E-01 | 3,025,020 |
| 7.10E-12 | 9.7  | 2.51E-01 | 3,037,499 |
| 7.15E-12 | 0    | 6.08E-01 | 3,032,924 |
| 7.17E-12 | 0    | 7.79E-01 | 2,713,337 |
| 7.21E-12 | 0    | 6.23E-01 | 3,024,590 |
| 7.21E-12 | 0    | 6.15E-01 | 3,011,254 |
| 7.25E-12 | 0    | 8.84E-01 | 3,037,129 |
| 7.27E-12 | 18.6 | 9.54E-02 | 3,035,786 |
| 7.37E-12 | 1.3  | 4.46E-01 | 3,037,499 |
| 7.38E-12 | 3.1  | 4.07E-01 | 3,006,833 |
| 7.44E-12 | 12.2 | 2.35E-01 | 2,984,827 |
| 7.45E-12 | 18.5 | 9.58E-02 | 3,037,499 |
| 7.46E-12 | 7.6  | 2.99E-01 | 3,037,499 |
| 7.54E-12 | 0    | 7.30E-01 | 3,035,804 |
| 7.56E-12 | 11.3 | 2.24E-01 | 3,019,199 |
| 7.56E-12 | 0    | 5.77E-01 | 2,976,359 |
| 7.70E-12 | 0    | 9.40E-01 | 3,034,989 |
| 7.72E-12 | 18.3 | 1.01E-01 | 3,033,353 |
| 7.72E-12 | 0    | 8.26E-01 | 3,034,989 |
| 7.73E-12 | 0    | 8.95E-01 | 3,024,163 |

|          |      |          |           |
|----------|------|----------|-----------|
| 7.74E-12 | 2.8  | 4.11E-01 | 3,035,786 |
| 7.90E-12 | 0    | 5.25E-01 | 3,037,499 |
| 7.91E-12 | 0    | 6.02E-01 | 3,037,499 |
| 7.92E-12 | 6.2  | 3.37E-01 | 2,522,421 |
| 7.99E-12 | 14.7 | 1.53E-01 | 3,037,499 |
| 8.03E-12 | 9.4  | 2.58E-01 | 3,037,499 |
| 8.05E-12 | 10.9 | 2.28E-01 | 3,035,066 |
| 8.15E-12 | 0    | 8.83E-01 | 3,036,702 |
| 8.21E-12 | 0    | 9.06E-01 | 3,020,638 |
| 8.22E-12 | 19.9 | 7.82E-02 | 3,037,499 |
| 8.24E-12 | 0    | 9.89E-01 | 3,035,786 |
| 8.27E-12 | 19.3 | 8.52E-02 | 3,037,499 |
| 8.27E-12 | 13.3 | 2.06E-01 | 2,991,462 |
| 8.34E-12 | 26.1 | 2.81E-02 | 3,036,158 |
| 8.54E-12 | 0    | 6.72E-01 | 3,036,702 |
| 8.57E-12 | 16.5 | 1.26E-01 | 3,030,170 |
| 8.58E-12 | 0    | 5.30E-01 | 3,036,702 |
| 8.67E-12 | 4.7  | 3.66E-01 | 3,035,786 |
| 8.70E-12 | 0    | 5.12E-01 | 3,007,807 |
| 8.71E-12 | 10   | 2.55E-01 | 3,014,215 |
| 8.73E-12 | 0    | 8.56E-01 | 3,037,499 |
| 8.85E-12 | 26.8 | 2.43E-02 | 3,035,804 |
| 8.89E-12 | 10.2 | 2.42E-01 | 3,036,702 |
| 8.92E-12 | 0    | 6.47E-01 | 3,037,499 |
| 8.92E-12 | 11.9 | 2.09E-01 | 3,034,989 |
| 8.95E-12 | 6.8  | 3.18E-01 | 3,037,499 |
| 8.99E-12 | 0    | 9.68E-01 | 2,985,819 |
| 8.99E-12 | 0    | 6.95E-01 | 3,036,702 |
| 9.02E-12 | 0    | 9.03E-01 | 3,033,433 |
| 9.05E-12 | 0    | 7.26E-01 | 2,773,006 |
| 9.07E-12 | 0.2  | 4.73E-01 | 3,022,450 |
| 9.16E-12 | 0    | 5.47E-01 | 3,015,421 |
| 9.16E-12 | 0    | 7.49E-01 | 2,951,517 |
| 9.32E-12 | 12.9 | 1.87E-01 | 3,037,499 |
| 9.33E-12 | 0    | 6.80E-01 | 3,033,433 |
| 9.36E-12 | 22.2 | 5.39E-02 | 3,037,499 |
| 9.40E-12 | 0    | 6.22E-01 | 3,036,702 |
| 9.40E-12 | 0    | 8.47E-01 | 2,494,708 |
| 9.41E-12 | 0    | 7.60E-01 | 3,036,702 |
| 9.43E-12 | 0    | 6.52E-01 | 3,019,258 |
| 9.65E-12 | 0    | 6.87E-01 | 3,030,822 |
| 9.68E-12 | 0    | 6.40E-01 | 3,037,499 |
| 9.83E-12 | 0    | 4.77E-01 | 2,933,659 |
| 9.99E-12 | 0    | 6.84E-01 | 2,914,044 |
| 1.02E-11 | 25.6 | 3.36E-02 | 3,022,351 |
| 1.04E-11 | 0    | 1.00E+00 | 2,272,216 |
| 1.05E-11 | 0    | 8.45E-01 | 3,037,499 |
| 1.06E-11 | 7.7  | 2.97E-01 | 3,036,702 |

|          |      |          |           |
|----------|------|----------|-----------|
| 1.06E-11 | 7.3  | 3.11E-01 | 3,030,824 |
| 1.06E-11 | 17   | 1.17E-01 | 3,037,499 |
| 1.08E-11 | 15.1 | 1.48E-01 | 3,035,679 |
| 1.08E-11 | 26.2 | 2.58E-02 | 3,037,499 |
| 1.09E-11 | 0    | 9.61E-01 | 3,037,499 |
| 1.09E-11 | 12.1 | 2.70E-01 | 2,901,430 |
| 1.09E-11 | 0    | 8.93E-01 | 3,037,129 |
| 1.09E-11 | 31.1 | 8.40E-03 | 3,036,702 |
| 1.11E-11 | 0    | 8.35E-01 | 3,036,955 |
| 1.12E-11 | 0    | 5.30E-01 | 3,037,499 |
| 1.13E-11 | 5.7  | 3.45E-01 | 3,033,353 |
| 1.14E-11 | 7.2  | 3.38E-01 | 2,954,341 |
| 1.15E-11 | 0    | 8.06E-01 | 3,035,786 |
| 1.15E-11 | 0    | 4.89E-01 | 3,027,060 |
| 1.16E-11 | 11.3 | 2.36E-01 | 2,995,066 |
| 1.18E-11 | 4.5  | 3.71E-01 | 3,037,499 |
| 1.19E-11 | 5.4  | 3.56E-01 | 3,004,117 |
| 1.21E-11 | 0    | 8.70E-01 | 3,036,702 |
| 1.22E-11 | 0    | 7.71E-01 | 3,011,268 |
| 1.25E-11 | 1.3  | 4.46E-01 | 3,037,499 |
| 1.29E-11 | 0    | 7.35E-01 | 3,030,651 |
| 1.30E-11 | 5.8  | 3.43E-01 | 3,021,552 |
| 1.30E-11 | 0    | 6.54E-01 | 3,037,499 |
| 1.30E-11 | 15.7 | 1.40E-01 | 3,033,958 |
| 1.30E-11 | 0    | 8.07E-01 | 3,037,499 |
| 1.32E-11 | 0    | 7.10E-01 | 3,035,786 |
| 1.32E-11 | 0    | 5.63E-01 | 3,015,850 |
| 1.32E-11 | 21   | 7.88E-02 | 3,003,362 |
| 1.33E-11 | 0.8  | 4.59E-01 | 3,037,499 |
| 1.34E-11 | 24.6 | 3.55E-02 | 3,037,499 |
| 1.34E-11 | 36.1 | 2.17E-03 | 3,033,940 |
| 1.37E-11 | 0    | 7.59E-01 | 3,037,499 |
| 1.38E-11 | 0.6  | 4.63E-01 | 2,995,653 |
| 1.38E-11 | 22.7 | 5.47E-02 | 3,030,102 |
| 1.39E-11 | 11.7 | 2.09E-01 | 3,037,499 |
| 1.40E-11 | 10.9 | 2.31E-01 | 3,033,371 |
| 1.41E-11 | 0    | 7.71E-01 | 3,031,119 |
| 1.42E-11 | 22   | 6.12E-02 | 3,030,322 |
| 1.43E-11 | 32.1 | 6.54E-03 | 3,036,702 |
| 1.45E-11 | 0    | 9.03E-01 | 3,036,702 |
| 1.45E-11 | 1.8  | 4.34E-01 | 3,034,989 |
| 1.45E-11 | 0    | 9.91E-01 | 3,005,259 |
| 1.46E-11 | 0    | 5.15E-01 | 3,036,702 |
| 1.47E-11 | 0    | 6.81E-01 | 3,037,499 |
| 1.49E-11 | 28.4 | 1.84E-02 | 3,022,468 |
| 1.50E-11 | 0    | 8.74E-01 | 3,037,499 |
| 1.50E-11 | 15.4 | 1.70E-01 | 3,002,805 |
| 1.51E-11 | 29.9 | 1.24E-02 | 3,033,043 |

|          |      |          |           |
|----------|------|----------|-----------|
| 1.51E-11 | 14.1 | 1.70E-01 | 3,021,552 |
| 1.51E-11 | 0    | 4.84E-01 | 3,012,623 |
| 1.55E-11 | 1.6  | 4.39E-01 | 3,036,702 |
| 1.55E-11 | 6.8  | 3.17E-01 | 3,037,499 |
| 1.57E-11 | 7    | 3.11E-01 | 3,037,499 |
| 1.59E-11 | 0    | 7.50E-01 | 3,005,318 |
| 1.61E-11 | 0    | 7.21E-01 | 3,022,450 |
| 1.62E-11 | 17.2 | 1.33E-01 | 3,002,689 |
| 1.64E-11 | 0    | 9.02E-01 | 3,037,499 |
| 1.66E-11 | 25.9 | 2.90E-02 | 3,023,247 |
| 1.66E-11 | 0    | 5.13E-01 | 3,029,493 |
| 1.69E-11 | 0    | 5.70E-01 | 1,484,736 |
| 1.72E-11 | 0    | 8.37E-01 | 3,036,702 |
| 1.72E-11 | 6.8  | 3.17E-01 | 3,037,499 |
| 1.72E-11 | 0    | 6.86E-01 | 3,035,066 |
| 1.73E-11 | 17.5 | 1.10E-01 | 3,036,702 |
| 1.73E-11 | 0    | 6.80E-01 | 3,036,702 |
| 1.74E-11 | 16.7 | 2.02E-01 | 2,933,285 |
| 1.74E-11 | 0    | 5.52E-01 | 3,037,499 |
| 1.74E-11 | 18.4 | 1.02E-01 | 3,030,610 |
| 1.76E-11 | 21.2 | 6.94E-02 | 3,034,075 |
| 1.76E-11 | 23.8 | 4.65E-02 | 3,019,209 |
| 1.77E-11 | 6.5  | 3.23E-01 | 3,037,499 |
| 1.77E-11 | 25.8 | 2.82E-02 | 3,037,499 |
| 1.78E-11 | 0    | 9.09E-01 | 3,036,702 |
| 1.79E-11 | 14.7 | 1.53E-01 | 3,037,499 |
| 1.79E-11 | 0    | 8.48E-01 | 2,986,243 |
| 1.82E-11 | 0    | 7.63E-01 | 3,035,786 |
| 1.83E-11 | 0    | 4.97E-01 | 3,035,066 |
| 1.85E-11 | 0    | 9.39E-01 | 3,021,719 |
| 1.86E-11 | 0    | 6.56E-01 | 3,018,322 |
| 1.88E-11 | 0    | 8.59E-01 | 3,035,786 |
| 1.90E-11 | 24.6 | 5.30E-02 | 2,999,371 |
| 1.91E-11 | 0    | 1.00E+00 | 2,272,216 |
| 1.92E-11 | 0    | 8.57E-01 | 3,016,819 |
| 1.92E-11 | 2.5  | 4.19E-01 | 3,037,499 |
| 1.92E-11 | 16.1 | 1.32E-01 | 3,036,702 |
| 1.94E-11 | 20.5 | 7.21E-02 | 3,000,868 |
| 1.95E-11 | 22.5 | 5.18E-02 | 3,037,499 |
| 2.01E-11 | 0    | 6.83E-01 | 3,037,499 |
| 2.02E-11 | 0    | 8.76E-01 | 3,035,786 |
| 2.02E-11 | 0    | 7.82E-01 | 3,035,007 |
| 2.04E-11 | 1.9  | 4.33E-01 | 3,036,702 |
| 2.05E-11 | 14.6 | 1.56E-01 | 3,037,499 |
| 2.05E-11 | 13.4 | 1.79E-01 | 3,036,702 |
| 2.12E-11 | 0    | 5.40E-01 | 3,032,556 |
| 2.13E-11 | 17   | 1.50E-01 | 2,987,725 |
| 2.14E-11 | 0    | 5.27E-01 | 3,000,868 |



|          |      |          |           |
|----------|------|----------|-----------|
| 2.14E-11 | 34.2 | 2.38E-02 | 2,915,227 |
| 2.14E-11 | 6    | 3.37E-01 | 3,036,702 |
| 2.15E-11 | 26.2 | 6.44E-02 | 2,969,204 |
| 2.16E-11 | 15.8 | 1.42E-01 | 3,031,658 |
| 2.19E-11 | 0    | 8.24E-01 | 3,037,499 |
| 2.21E-11 | 0.7  | 4.61E-01 | 3,035,066 |
| 2.23E-11 | 20.3 | 1.93E-01 | 2,154,190 |
| 2.26E-11 | 24.6 | 3.80E-02 | 3,034,212 |
| 2.26E-11 | 17.2 | 1.17E-01 | 3,033,353 |
| 2.26E-11 | 16.5 | 1.28E-01 | 3,033,966 |
| 2.28E-11 | 0    | 9.30E-01 | 3,010,042 |
| 2.28E-11 | 1.1  | 4.53E-01 | 3,036,702 |
| 2.30E-11 | 0.6  | 4.62E-01 | 3,036,702 |
| 2.31E-11 | 28   | 1.72E-02 | 3,037,499 |
| 2.31E-11 | 4.9  | 3.62E-01 | 3,036,702 |
| 2.31E-11 | 23.1 | 4.89E-02 | 3,033,840 |
| 2.32E-11 | 0    | 9.15E-01 | 3,014,573 |
| 2.33E-11 | 7.5  | 3.03E-01 | 2,999,527 |
| 2.33E-11 | 0    | 5.18E-01 | 3,037,181 |
| 2.36E-11 | 0    | 5.11E-01 | 3,033,948 |
| 2.36E-11 | 0    | 6.37E-01 | 3,028,751 |
| 2.41E-11 | 0    | 4.95E-01 | 3,034,899 |
| 2.42E-11 | 0    | 9.01E-01 | 3,037,499 |
| 2.44E-11 | 1.2  | 4.49E-01 | 3,033,353 |
| 2.46E-11 | 0    | 8.43E-01 | 3,036,702 |
| 2.46E-11 | 0    | 8.95E-01 | 3,015,574 |
| 2.50E-11 | 27.7 | 1.87E-02 | 3,037,499 |
| 2.55E-11 | 0    | 7.14E-01 | 3,035,786 |
| 2.57E-11 | 12   | 2.05E-01 | 3,035,786 |
| 2.58E-11 | 0    | 7.29E-01 | 3,033,353 |
| 2.59E-11 | 15.7 | 1.37E-01 | 3,037,499 |
| 2.59E-11 | 0    | 7.57E-01 | 3,036,702 |
| 2.59E-11 | 12.5 | 1.98E-01 | 3,034,091 |
| 2.59E-11 | 0    | 8.83E-01 | 3,036,158 |
| 2.60E-11 | 0    | 5.43E-01 | 3,037,499 |
| 2.61E-11 | 0    | 6.04E-01 | 3,020,814 |
| 2.64E-11 | 0    | 8.42E-01 | 3,037,499 |
| 2.65E-11 | 0    | 5.18E-01 | 3,036,702 |
| 2.65E-11 | 0    | 8.16E-01 | 2,911,174 |
| 2.67E-11 | 18.1 | 1.02E-01 | 3,024,960 |
| 2.68E-11 | 0    | 1.00E+00 | 2,272,216 |
| 2.69E-11 | 28.5 | 1.72E-02 | 3,033,316 |
| 2.69E-11 | 12.3 | 2.00E-01 | 3,036,702 |
| 2.72E-11 | 14.2 | 1.81E-01 | 2,515,012 |
| 2.73E-11 | 13.9 | 1.68E-01 | 3,037,499 |
| 2.76E-11 | 5.6  | 3.47E-01 | 3,021,552 |
| 2.77E-11 | 0    | 5.76E-01 | 3,036,702 |
| 2.77E-11 | 43.3 | 1.84E-01 | 2,713,337 |

|          |      |          |           |
|----------|------|----------|-----------|
| 2.78E-11 | 16.3 | 1.37E-01 | 2,982,488 |
| 2.81E-11 | 0    | 6.47E-01 | 3,035,786 |
| 2.81E-11 | 9.5  | 2.55E-01 | 3,037,499 |
| 2.84E-11 | 0    | 6.87E-01 | 3,037,499 |
| 2.86E-11 | 0    | 5.64E-01 | 3,033,433 |
| 2.88E-11 | 11.2 | 2.21E-01 | 3,024,960 |
| 2.88E-11 | 5.4  | 3.50E-01 | 3,035,786 |
| 2.90E-11 | 1    | 4.54E-01 | 3,035,788 |
| 2.90E-11 | 24.4 | 7.00E-02 | 3,011,746 |
| 2.91E-11 | 0    | 5.31E-01 | 3,024,163 |
| 2.92E-11 | 0    | 9.76E-01 | 2,960,911 |
| 2.94E-11 | 5.2  | 3.54E-01 | 3,037,499 |
| 2.94E-11 | 0    | 5.60E-01 | 3,036,702 |
| 2.98E-11 | 0.3  | 4.71E-01 | 3,037,499 |
| 2.99E-11 | 5.7  | 3.44E-01 | 3,036,702 |
| 3.00E-11 | 18.6 | 9.71E-02 | 3,035,242 |
| 3.00E-11 | 1.8  | 4.35E-01 | 3,034,091 |
| 3.02E-11 | 10.5 | 2.35E-01 | 3,037,499 |
| 3.04E-11 | 15.8 | 1.43E-01 | 3,016,725 |
| 3.05E-11 | 10.9 | 2.74E-01 | 2,158,793 |
| 3.08E-11 | 9.1  | 2.65E-01 | 3,037,499 |
| 3.09E-11 | 0    | 5.48E-01 | 3,033,294 |
| 3.09E-11 | 0    | 4.77E-01 | 3,034,989 |
| 3.10E-11 | 13.2 | 1.85E-01 | 2,999,527 |
| 3.12E-11 | 20.8 | 7.08E-02 | 3,022,527 |
| 3.13E-11 | 0    | 7.64E-01 | 3,035,066 |
| 3.18E-11 | 0    | 6.70E-01 | 3,037,499 |
| 3.23E-11 | 0    | 6.68E-01 | 3,034,445 |
| 3.23E-11 | 9.5  | 2.58E-01 | 3,034,989 |
| 3.24E-11 | 0    | 6.43E-01 | 3,035,786 |
| 3.27E-11 | 20.1 | 8.04E-02 | 3,020,814 |
| 3.27E-11 | 0    | 7.32E-01 | 3,035,804 |
| 3.33E-11 | 0    | 6.78E-01 | 3,036,702 |
| 3.33E-11 | 17.6 | 1.41E-01 | 2,961,393 |
| 3.35E-11 | 28.7 | 1.49E-02 | 3,037,499 |
| 3.36E-11 | 11.4 | 2.29E-01 | 3,025,179 |
| 3.37E-11 | 21.7 | 5.99E-02 | 3,035,786 |
| 3.40E-11 | 0    | 5.96E-01 | 3,036,702 |
| 3.40E-11 | 0    | 5.64E-01 | 3,036,955 |
| 3.46E-11 | 0    | 4.77E-01 | 2,920,982 |
| 3.49E-11 | 12.8 | 2.01E-01 | 3,012,408 |
| 3.50E-11 | 23.9 | 4.04E-02 | 3,037,499 |
| 3.50E-11 | 11.9 | 2.06E-01 | 3,037,499 |
| 3.51E-11 | 14   | 1.93E-01 | 2,265,675 |
| 3.61E-11 | 16.1 | 1.32E-01 | 3,036,702 |
| 3.63E-11 | 8.3  | 2.85E-01 | 3,020,814 |
| 3.64E-11 | 7.7  | 3.13E-01 | 2,957,734 |
| 3.65E-11 | 0    | 8.37E-01 | 3,036,158 |

|          |      |          |           |
|----------|------|----------|-----------|
| 3.66E-11 | 0    | 4.80E-01 | 2,879,522 |
| 3.66E-11 | 32.2 | 6.02E-03 | 3,037,499 |
| 3.68E-11 | 5.6  | 3.45E-01 | 3,035,786 |
| 3.69E-11 | 0    | 8.32E-01 | 3,028,860 |
| 3.73E-11 | 0    | 8.71E-01 | 3,037,499 |
| 3.77E-11 | 4.9  | 3.61E-01 | 3,035,786 |
| 3.78E-11 | 0    | 6.38E-01 | 2,872,481 |
| 3.81E-11 | 4.8  | 3.63E-01 | 3,037,499 |
| 3.81E-11 | 0    | 8.86E-01 | 3,036,702 |
| 3.86E-11 | 17.3 | 1.22E-01 | 3,024,514 |
| 3.92E-11 | 0    | 8.67E-01 | 2,980,763 |
| 3.95E-11 | 0    | 7.65E-01 | 3,036,702 |
| 4.00E-11 | 0    | 6.33E-01 | 3,037,499 |
| 4.06E-11 | 0    | 5.06E-01 | 3,035,066 |
| 4.06E-11 | 19.4 | 1.39E-01 | 2,979,735 |
| 4.07E-11 | 2.7  | 4.13E-01 | 3,024,960 |
| 4.07E-11 | 0    | 5.67E-01 | 3,037,499 |
| 4.08E-11 | 0    | 8.71E-01 | 3,028,258 |
| 4.09E-11 | 12.8 | 1.91E-01 | 3,035,786 |
| 4.12E-11 | 21.2 | 6.69E-02 | 3,036,158 |
| 4.12E-11 | 28.2 | 2.23E-02 | 3,008,234 |
| 4.14E-11 | 11.8 | 2.67E-01 | 2,944,929 |
| 4.14E-11 | 13.6 | 1.72E-01 | 3,037,499 |
| 4.18E-11 | 13.9 | 1.67E-01 | 3,037,499 |
| 4.18E-11 | 4.3  | 3.75E-01 | 3,036,702 |
| 4.19E-11 | 8.9  | 2.70E-01 | 3,036,702 |
| 4.21E-11 | 15.1 | 1.50E-01 | 3,036,585 |
| 4.22E-11 | 29.4 | 2.47E-02 | 2,955,914 |
| 4.23E-11 | 16.9 | 1.56E-01 | 2,970,977 |
| 4.32E-11 | 0    | 8.22E-01 | 3,036,158 |
| 4.34E-11 | 26   | 2.83E-02 | 3,034,989 |
| 4.40E-11 | 25.3 | 3.27E-02 | 3,036,384 |
| 4.41E-11 | 4.3  | 3.84E-01 | 2,485,322 |
| 4.42E-11 | 0    | 8.77E-01 | 3,035,786 |
| 4.43E-11 | 10.2 | 2.44E-01 | 3,000,071 |
| 4.52E-11 | 6.3  | 3.28E-01 | 3,037,499 |
| 4.53E-11 | 11.7 | 2.16E-01 | 3,021,552 |
| 4.53E-11 | 7.5  | 3.24E-01 | 2,973,730 |
| 4.56E-11 | 0    | 6.45E-01 | 3,024,416 |
| 4.57E-11 | 8.5  | 2.78E-01 | 3,035,786 |
| 4.57E-11 | 12.6 | 1.92E-01 | 3,037,499 |
| 4.59E-11 | 10   | 2.47E-01 | 3,035,186 |
| 4.61E-11 | 3    | 4.08E-01 | 3,036,702 |
| 4.61E-11 | 4.2  | 3.78E-01 | 3,035,786 |
| 4.64E-11 | 4.5  | 3.70E-01 | 3,037,499 |
| 4.64E-11 | 0    | 6.94E-01 | 3,034,989 |
| 4.64E-11 | 10.7 | 2.31E-01 | 3,035,553 |
| 4.65E-11 | 10.9 | 2.28E-01 | 3,034,756 |

|          |      |          |           |
|----------|------|----------|-----------|
| 4.69E-11 | 0    | 5.51E-01 | 3,037,499 |
| 4.73E-11 | 15.6 | 1.42E-01 | 3,019,258 |
| 4.78E-11 | 0    | 5.10E-01 | 3,037,499 |
| 4.81E-11 | 16.9 | 1.23E-01 | 3,019,978 |
| 4.83E-11 | 12.4 | 3.28E-01 | 2,792,318 |
| 4.84E-11 | 0    | 5.45E-01 | 3,016,936 |
| 4.92E-11 | 0    | 6.52E-01 | 3,034,756 |
| 4.92E-11 | 9.2  | 2.76E-01 | 3,013,698 |
| 4.94E-11 | 0    | 5.86E-01 | 3,037,499 |
| 5.02E-11 | 0    | 7.82E-01 | 3,037,499 |
| 5.05E-11 | 13.8 | 2.12E-01 | 2,977,072 |
| 5.07E-11 | 1.9  | 4.33E-01 | 3,029,424 |
| 5.08E-11 | 1.1  | 4.52E-01 | 3,035,786 |
| 5.09E-11 | 0    | 6.27E-01 | 3,034,989 |
| 5.11E-11 | 0.7  | 4.60E-01 | 3,035,066 |
| 5.12E-11 | 0    | 8.48E-01 | 3,034,445 |
| 5.12E-11 | 12   | 2.08E-01 | 3,033,043 |
| 5.17E-11 | 25.5 | 3.03E-02 | 3,034,230 |
| 5.22E-11 | 0    | 8.47E-01 | 3,036,702 |
| 5.23E-11 | 27.2 | 3.95E-02 | 2,982,386 |
| 5.24E-11 | 2.7  | 4.18E-01 | 3,003,004 |
| 5.27E-11 | 0    | 9.81E-01 | 3,035,679 |
| 5.30E-11 | 12.9 | 1.88E-01 | 3,034,269 |
| 5.32E-11 | 17.2 | 1.15E-01 | 3,036,702 |
| 5.38E-11 | 0    | 8.77E-01 | 3,004,226 |
| 5.41E-11 | 0    | 6.04E-01 | 2,959,567 |
| 5.42E-11 | 18.5 | 9.59E-02 | 3,037,499 |
| 5.46E-11 | 0    | 8.16E-01 | 3,020,832 |
| 5.47E-11 | 20.6 | 7.15E-02 | 3,037,181 |
| 5.56E-11 | 0    | 6.17E-01 | 3,034,989 |
| 5.58E-11 | 0    | 9.18E-01 | 3,029,534 |
| 5.64E-11 | 12.6 | 2.29E-01 | 2,979,547 |
| 5.69E-11 | 13.8 | 1.71E-01 | 3,036,702 |
| 5.73E-11 | 0    | 5.58E-01 | 3,037,499 |
| 5.76E-11 | 0    | 5.73E-01 | 3,014,386 |
| 5.79E-11 | 11.7 | 2.10E-01 | 3,037,499 |
| 5.85E-11 | 1.4  | 4.46E-01 | 3,010,039 |
| 5.85E-11 | 0    | 6.01E-01 | 3,037,499 |
| 5.87E-11 | 0    | 6.70E-01 | 3,035,786 |
| 5.89E-11 | 20.4 | 8.54E-02 | 3,011,117 |
| 5.89E-11 | 20.5 | 7.30E-02 | 3,037,129 |
| 5.94E-11 | 0    | 8.66E-01 | 2,950,304 |
| 5.98E-11 | 24.8 | 3.57E-02 | 3,034,957 |
| 5.99E-11 | 5.9  | 3.39E-01 | 3,036,955 |
| 6.00E-11 | 23.7 | 4.25E-02 | 3,035,786 |
| 6.01E-11 | 0    | 7.85E-01 | 3,033,353 |
| 6.04E-11 | 0    | 5.58E-01 | 3,034,756 |
| 6.14E-11 | 0    | 5.88E-01 | 3,034,989 |

|          |      |          |           |
|----------|------|----------|-----------|
| 6.20E-11 | 0    | 1.00E+00 | 2,272,216 |
| 6.20E-11 | 29.2 | 1.42E-02 | 3,036,158 |
| 6.27E-11 | 0    | 7.20E-01 | 3,036,702 |
| 6.27E-11 | 25.1 | 3.27E-02 | 3,036,702 |
| 6.28E-11 | 12.7 | 1.93E-01 | 3,034,874 |
| 6.36E-11 | 0    | 5.37E-01 | 3,036,702 |
| 6.38E-11 | 4.1  | 3.80E-01 | 3,035,786 |
| 6.42E-11 | 0    | 5.42E-01 | 3,020,814 |
| 6.44E-11 | 0    | 6.44E-01 | 3,016,113 |
| 6.48E-11 | 15.3 | 1.46E-01 | 3,036,702 |
| 6.51E-11 | 0    | 8.67E-01 | 3,036,702 |
| 6.54E-11 | 24.4 | 4.22E-02 | 3,019,119 |
| 6.56E-11 | 19.2 | 8.85E-02 | 3,036,702 |
| 6.57E-11 | 0    | 1.00E+00 | 2,272,216 |
| 6.71E-11 | 0    | 6.21E-01 | 3,027,358 |
| 6.74E-11 | 0.7  | 4.61E-01 | 3,030,433 |
| 6.77E-11 | 0    | 7.49E-01 | 3,035,786 |
| 6.80E-11 | 0    | 5.52E-01 | 3,019,119 |
| 6.81E-11 | 0.9  | 4.56E-01 | 3,033,188 |
| 6.83E-11 | 0    | 8.40E-01 | 3,037,499 |
| 6.84E-11 | 0    | 5.92E-01 | 3,031,835 |
| 6.85E-11 | 0    | 9.45E-01 | 3,023,247 |
| 6.87E-11 | 27   | 3.96E-02 | 2,992,840 |
| 6.93E-11 | 0    | 5.79E-01 | 3,037,499 |
| 6.97E-11 | 9.7  | 2.53E-01 | 3,036,702 |
| 7.01E-11 | 17.8 | 1.08E-01 | 3,000,071 |
| 7.01E-11 | 5.2  | 3.59E-01 | 3,015,852 |
| 7.02E-11 | 0    | 5.87E-01 | 3,036,702 |
| 7.04E-11 | 0    | 8.78E-01 | 3,017,073 |
| 7.12E-11 | 1.5  | 4.42E-01 | 3,037,499 |
| 7.12E-11 | 29.6 | 1.25E-02 | 3,036,702 |
| 7.14E-11 | 0    | 9.85E-01 | 3,037,499 |
| 7.17E-11 | 0    | 8.71E-01 | 3,024,960 |
| 7.19E-11 | 0    | 7.24E-01 | 3,035,788 |
| 7.24E-11 | 6.3  | 3.28E-01 | 3,036,702 |
| 7.30E-11 | 12.6 | 2.85E-01 | 2,713,337 |
| 7.31E-11 | 0    | 8.84E-01 | 3,036,702 |
| 7.35E-11 | 0    | 7.67E-01 | 3,036,702 |
| 7.37E-11 | 0    | 9.42E-01 | 2,997,977 |
| 7.43E-11 | 0    | 5.76E-01 | 3,037,499 |
| 7.51E-11 | 0    | 4.90E-01 | 3,036,702 |
| 7.53E-11 | 27.5 | 1.93E-02 | 3,037,499 |
| 7.68E-11 | 0    | 7.20E-01 | 2,993,218 |
| 7.74E-11 | 4.5  | 3.70E-01 | 3,024,960 |
| 7.87E-11 | 0    | 7.85E-01 | 3,037,499 |
| 8.02E-11 | 0    | 9.70E-01 | 3,010,543 |
| 8.04E-11 | 0.9  | 4.56E-01 | 3,000,868 |
| 8.07E-11 | 0    | 5.47E-01 | 3,036,702 |

|          |      |          |           |
|----------|------|----------|-----------|
| 8.16E-11 | 0    | 5.57E-01 | 3,020,049 |
| 8.17E-11 | 25.9 | 3.19E-02 | 2,982,000 |
| 8.20E-11 | 0    | 9.82E-01 | 3,036,702 |
| 8.26E-11 | 17.1 | 1.16E-01 | 3,035,066 |
| 8.36E-11 | 2.9  | 4.16E-01 | 2,997,574 |
| 8.40E-11 | 0    | 5.73E-01 | 3,034,230 |
| 8.45E-11 | 2.7  | 4.14E-01 | 3,037,499 |
| 8.55E-11 | 9    | 2.66E-01 | 3,037,499 |
| 8.58E-11 | 0    | 8.84E-01 | 2,155,146 |
| 8.58E-11 | 9.9  | 2.47E-01 | 3,037,499 |
| 8.58E-11 | 0    | 8.77E-01 | 3,024,416 |
| 8.59E-11 | 23.9 | 4.11E-02 | 3,024,960 |
| 8.66E-11 | 14.1 | 1.84E-01 | 3,012,354 |
| 8.67E-11 | 0    | 7.16E-01 | 3,036,702 |
| 8.71E-11 | 22   | 1.25E-01 | 2,934,313 |
| 8.82E-11 | 0    | 7.83E-01 | 3,029,596 |
| 8.87E-11 | 0    | 8.67E-01 | 3,031,148 |
| 8.89E-11 | 0    | 7.19E-01 | 3,035,553 |
| 8.89E-11 | 0    | 7.82E-01 | 3,036,702 |
| 8.93E-11 | 2.8  | 4.12E-01 | 3,024,163 |
| 9.02E-11 | 1.2  | 4.49E-01 | 3,037,499 |
| 9.08E-11 | 0    | 9.02E-01 | 3,037,499 |
| 9.23E-11 | 16   | 1.33E-01 | 3,036,702 |
| 9.25E-11 | 2.7  | 4.15E-01 | 3,000,532 |
| 9.30E-11 | 0    | 6.40E-01 | 3,037,499 |
| 9.31E-11 | 0    | 1.00E+00 | 2,272,216 |
| 9.32E-11 | 0    | 4.84E-01 | 3,020,814 |
| 9.32E-11 | 9    | 2.69E-01 | 3,034,230 |
| 9.39E-11 | 3.6  | 3.93E-01 | 3,031,603 |
| 9.55E-11 | 0    | 8.33E-01 | 3,037,499 |
| 9.55E-11 | 21.9 | 7.07E-02 | 2,998,757 |
| 9.60E-11 | 22.1 | 5.49E-02 | 3,037,499 |
| 9.61E-11 | 0    | 5.24E-01 | 3,032,556 |
| 9.63E-11 | 11.2 | 2.19E-01 | 3,037,499 |
| 9.65E-11 | 13.6 | 1.73E-01 | 3,037,499 |
| 9.68E-11 | 9.1  | 3.06E-01 | 2,969,855 |
| 9.81E-11 | 14.9 | 1.50E-01 | 3,037,499 |
| 9.98E-11 | 14.4 | 1.73E-01 | 2,552,095 |
| 1.00E-10 | 13.4 | 1.77E-01 | 3,037,499 |
| 1.01E-10 | 0    | 5.29E-01 | 3,030,084 |
| 1.01E-10 | 13   | 1.87E-01 | 3,036,158 |
| 1.02E-10 | 0    | 9.77E-01 | 3,020,898 |
| 1.02E-10 | 15.5 | 1.40E-01 | 3,037,499 |
| 1.02E-10 | 27.7 | 2.06E-02 | 3,034,091 |
| 1.03E-10 | 15.2 | 1.45E-01 | 3,037,499 |
| 1.04E-10 | 20   | 8.39E-02 | 2,996,724 |
| 1.05E-10 | 12.4 | 1.99E-01 | 3,000,071 |
| 1.05E-10 | 9.9  | 2.64E-01 | 2,999,906 |

|          |      |          |           |
|----------|------|----------|-----------|
| 1.06E-10 | 0    | 8.56E-01 | 3,020,894 |
| 1.06E-10 | 10.3 | 2.38E-01 | 3,037,499 |
| 1.06E-10 | 21.7 | 5.92E-02 | 3,037,499 |
| 1.07E-10 | 4.8  | 3.65E-01 | 3,036,158 |
| 1.08E-10 | 0    | 7.86E-01 | 3,037,499 |
| 1.08E-10 | 0    | 8.73E-01 | 3,032,517 |
| 1.08E-10 | 0    | 8.26E-01 | 3,033,976 |
| 1.09E-10 | 0    | 6.56E-01 | 3,035,066 |
| 1.10E-10 | 13.8 | 1.83E-01 | 3,014,332 |
| 1.11E-10 | 0    | 7.16E-01 | 3,036,702 |
| 1.11E-10 | 17.8 | 1.07E-01 | 3,036,332 |
| 1.11E-10 | 0    | 9.79E-01 | 3,037,499 |
| 1.11E-10 | 0    | 5.24E-01 | 3,018,283 |
| 1.13E-10 | 29.6 | 1.25E-02 | 3,031,883 |
| 1.14E-10 | 0    | 7.80E-01 | 3,023,249 |
| 1.15E-10 | 28.7 | 2.14E-02 | 3,007,133 |
| 1.15E-10 | 0    | 7.38E-01 | 3,007,274 |
| 1.15E-10 | 0    | 5.99E-01 | 3,015,030 |
| 1.15E-10 | 2.9  | 4.09E-01 | 3,035,786 |
| 1.16E-10 | 12.7 | 1.95E-01 | 3,034,091 |
| 1.17E-10 | 3    | 4.06E-01 | 3,037,499 |
| 1.17E-10 | 2.2  | 4.26E-01 | 3,029,299 |
| 1.18E-10 | 26.4 | 2.72E-02 | 3,033,161 |
| 1.18E-10 | 9.1  | 2.67E-01 | 3,032,284 |
| 1.19E-10 | 0    | 1.00E+00 | 2,272,216 |
| 1.20E-10 | 0    | 5.32E-01 | 3,037,499 |
| 1.21E-10 | 26.7 | 2.30E-02 | 3,037,499 |
| 1.21E-10 | 0    | 9.01E-01 | 2,973,558 |
| 1.22E-10 | 0    | 9.41E-01 | 3,034,269 |
| 1.22E-10 | 25   | 3.46E-02 | 3,034,989 |
| 1.23E-10 | 0    | 6.17E-01 | 3,037,499 |
| 1.24E-10 | 16.4 | 1.44E-01 | 3,004,540 |
| 1.24E-10 | 7.3  | 3.05E-01 | 3,037,499 |
| 1.24E-10 | 0    | 4.81E-01 | 3,037,499 |
| 1.26E-10 | 20.3 | 8.07E-02 | 3,020,755 |
| 1.27E-10 | 2.6  | 4.16E-01 | 3,024,163 |
| 1.27E-10 | 0    | 8.08E-01 | 3,029,604 |
| 1.28E-10 | 0    | 8.01E-01 | 3,037,499 |
| 1.28E-10 | 0    | 8.28E-01 | 3,003,019 |
| 1.29E-10 | 10.9 | 2.25E-01 | 3,037,499 |
| 1.29E-10 | 0    | 7.60E-01 | 3,036,702 |
| 1.32E-10 | 0    | 8.67E-01 | 3,036,702 |
| 1.33E-10 | 0    | 6.57E-01 | 3,024,152 |
| 1.33E-10 | 7.5  | 3.03E-01 | 3,033,353 |
| 1.34E-10 | 30.6 | 9.71E-03 | 3,035,786 |
| 1.35E-10 | 0    | 7.37E-01 | 3,036,158 |
| 1.36E-10 | 5.5  | 3.50E-01 | 3,033,316 |
| 1.36E-10 | 0    | 9.16E-01 | 2,995,645 |

|          |      |          |           |
|----------|------|----------|-----------|
| 1.37E-10 | 0    | 7.73E-01 | 3,037,499 |
| 1.38E-10 | 0    | 4.74E-01 | 2,826,053 |
| 1.40E-10 | 12.8 | 1.91E-01 | 3,036,585 |
| 1.40E-10 | 0    | 6.62E-01 | 1,470,599 |
| 1.40E-10 | 18.2 | 9.91E-02 | 3,037,499 |
| 1.42E-10 | 2    | 4.30E-01 | 3,027,082 |
| 1.42E-10 | 14.9 | 1.50E-01 | 3,037,499 |
| 1.44E-10 | 14.3 | 1.61E-01 | 3,035,786 |
| 1.44E-10 | 20.9 | 6.99E-02 | 3,033,966 |
| 1.45E-10 | 9    | 2.70E-01 | 3,028,720 |
| 1.45E-10 | 1.8  | 4.34E-01 | 3,033,246 |
| 1.46E-10 | 0    | 8.15E-01 | 3,017,369 |
| 1.46E-10 | 0    | 6.87E-01 | 2,891,894 |
| 1.46E-10 | 10   | 2.46E-01 | 3,037,499 |
| 1.46E-10 | 0    | 9.71E-01 | 3,025,347 |
| 1.46E-10 | 12.4 | 2.00E-01 | 3,022,439 |
| 1.48E-10 | 7.9  | 2.92E-01 | 3,037,499 |
| 1.49E-10 | 0    | 8.45E-01 | 3,037,499 |
| 1.49E-10 | 0    | 9.74E-01 | 3,037,499 |
| 1.50E-10 | 0    | 6.03E-01 | 3,025,093 |
| 1.50E-10 | 0    | 9.39E-01 | 3,037,499 |
| 1.51E-10 | 12.4 | 2.01E-01 | 3,021,730 |
| 1.53E-10 | 13.8 | 1.71E-01 | 3,036,702 |
| 1.54E-10 | 0    | 1.00E+00 | 2,272,216 |
| 1.55E-10 | 13.4 | 1.78E-01 | 3,036,702 |
| 1.55E-10 | 1.7  | 4.38E-01 | 3,037,499 |
| 1.56E-10 | 15.4 | 1.42E-01 | 3,037,499 |
| 1.56E-10 | 16.3 | 1.60E-01 | 2,996,603 |
| 1.59E-10 | 11.6 | 2.14E-01 | 3,034,989 |
| 1.60E-10 | 21.9 | 6.33E-02 | 3,020,462 |
| 1.61E-10 | 26.8 | 2.43E-02 | 3,034,792 |
| 1.61E-10 | 39.2 | 1.35E-03 | 3,015,742 |
| 1.63E-10 | 1.1  | 4.52E-01 | 3,037,499 |
| 1.64E-10 | 0    | 6.99E-01 | 3,034,890 |
| 1.64E-10 | 0    | 5.49E-01 | 2,999,155 |
| 1.65E-10 | 0    | 6.70E-01 | 3,024,521 |
| 1.65E-10 | 0    | 8.25E-01 | 3,036,702 |
| 1.65E-10 | 10.7 | 2.29E-01 | 3,037,499 |
| 1.65E-10 | 15.2 | 1.48E-01 | 3,034,989 |
| 1.65E-10 | 0    | 7.16E-01 | 3,037,499 |
| 1.65E-10 | 0    | 9.47E-01 | 3,031,720 |
| 1.67E-10 | 6.5  | 3.23E-01 | 3,037,499 |
| 1.67E-10 | 0    | 7.97E-01 | 3,021,691 |
| 1.67E-10 | 0    | 7.31E-01 | 3,010,054 |
| 1.67E-10 | 14   | 1.68E-01 | 3,036,702 |
| 1.68E-10 | 0    | 7.15E-01 | 3,037,499 |
| 1.68E-10 | 19.6 | 9.13E-02 | 3,005,444 |
| 1.69E-10 | 7.6  | 2.98E-01 | 3,037,499 |



|          |      |          |           |
|----------|------|----------|-----------|
| 1.70E-10 | 0    | 8.82E-01 | 3,036,702 |
| 1.71E-10 | 0    | 8.34E-01 | 3,022,527 |
| 1.71E-10 | 15.2 | 1.45E-01 | 3,037,499 |
| 1.72E-10 | 5.3  | 3.51E-01 | 3,037,499 |
| 1.73E-10 | 0    | 5.51E-01 | 3,034,989 |
| 1.75E-10 | 0    | 7.23E-01 | 3,037,499 |
| 1.75E-10 | 0    | 9.30E-01 | 3,036,702 |
| 1.76E-10 | 0    | 9.94E-01 | 3,035,786 |
| 1.78E-10 | 16.6 | 1.24E-01 | 3,035,786 |
| 1.79E-10 | 6.4  | 3.28E-01 | 3,036,702 |
| 1.81E-10 | 10.2 | 2.44E-01 | 3,033,208 |
| 1.82E-10 | 0    | 7.32E-01 | 3,037,499 |
| 1.83E-10 | 0    | 6.63E-01 | 3,035,242 |
| 1.83E-10 | 25   | 3.45E-02 | 3,032,517 |
| 1.83E-10 | 16.4 | 1.42E-01 | 3,002,136 |
| 1.84E-10 | 17.5 | 1.11E-01 | 3,034,230 |
| 1.84E-10 | 0    | 7.31E-01 | 3,000,071 |
| 1.86E-10 | 24.6 | 3.60E-02 | 3,034,230 |
| 1.86E-10 | 6.6  | 3.25E-01 | 3,033,547 |
| 1.87E-10 | 22   | 5.70E-02 | 3,036,702 |
| 1.87E-10 | 0    | 5.25E-01 | 3,007,138 |
| 1.88E-10 | 0    | 8.88E-01 | 3,010,789 |
| 1.88E-10 | 43.7 | 1.14E-01 | 507,215   |
| 1.88E-10 | 0    | 7.48E-01 | 3,035,007 |
| 1.89E-10 | 23.3 | 4.71E-02 | 3,023,247 |
| 1.90E-10 | 0    | 5.96E-01 | 3,034,989 |
| 1.91E-10 | 12.7 | 1.93E-01 | 3,024,163 |
| 1.92E-10 | 0    | 6.05E-01 | 3,035,786 |
| 1.92E-10 | 13.7 | 1.73E-01 | 3,035,786 |
| 1.93E-10 | 0    | 8.86E-01 | 2,981,798 |
| 1.93E-10 | 0    | 5.22E-01 | 3,034,989 |
| 1.94E-10 | 30.4 | 1.32E-02 | 3,009,682 |
| 1.94E-10 | 25.3 | 3.20E-02 | 3,036,702 |
| 1.94E-10 | 13.8 | 1.71E-01 | 3,036,702 |
| 1.94E-10 | 18.4 | 9.87E-02 | 3,035,066 |
| 1.94E-10 | 0    | 1.00E+00 | 2,272,216 |
| 1.95E-10 | 28   | 1.75E-02 | 3,037,499 |
| 1.96E-10 | 7.3  | 3.10E-01 | 2,992,793 |
| 1.98E-10 | 0    | 5.66E-01 | 3,035,786 |
| 1.98E-10 | 12.4 | 1.96E-01 | 3,037,499 |
| 1.99E-10 | 0    | 6.39E-01 | 3,034,504 |
| 2.02E-10 | 1.7  | 4.38E-01 | 3,034,989 |
| 2.03E-10 | 3.7  | 3.91E-01 | 3,020,017 |
| 2.04E-10 | 3.3  | 4.00E-01 | 3,031,459 |
| 2.04E-10 | 0    | 7.23E-01 | 3,036,702 |
| 2.05E-10 | 0    | 7.32E-01 | 3,037,499 |
| 2.05E-10 | 16.8 | 1.24E-01 | 3,019,240 |
| 2.06E-10 | 5.5  | 3.48E-01 | 3,036,702 |

|          |      |          |           |
|----------|------|----------|-----------|
| 2.06E-10 | 0    | 6.39E-01 | 3,020,755 |
| 2.06E-10 | 0    | 8.42E-01 | 3,037,499 |
| 2.06E-10 | 0    | 6.64E-01 | 3,036,702 |
| 2.06E-10 | 36.7 | 1.54E-03 | 3,034,230 |
| 2.07E-10 | 0    | 7.49E-01 | 2,984,527 |
| 2.10E-10 | 12.4 | 2.01E-01 | 3,028,138 |
| 2.10E-10 | 10.1 | 2.46E-01 | 3,034,989 |
| 2.12E-10 | 0    | 8.23E-01 | 3,023,247 |
| 2.12E-10 | 0    | 7.86E-01 | 3,032,030 |
| 2.13E-10 | 0    | 7.96E-01 | 3,018,241 |
| 2.13E-10 | 0    | 7.24E-01 | 2,997,599 |
| 2.15E-10 | 0    | 5.27E-01 | 3,024,960 |
| 2.15E-10 | 0    | 6.86E-01 | 3,037,499 |
| 2.17E-10 | 22.8 | 4.87E-02 | 3,037,499 |
| 2.18E-10 | 0    | 6.32E-01 | 3,037,499 |
| 2.18E-10 | 0    | 5.50E-01 | 3,036,702 |
| 2.19E-10 | 0    | 4.85E-01 | 2,980,456 |
| 2.21E-10 | 14.3 | 1.68E-01 | 3,018,071 |
| 2.21E-10 | 0    | 6.97E-01 | 2,993,654 |
| 2.21E-10 | 0    | 9.77E-01 | 3,016,213 |
| 2.21E-10 | 12.2 | 2.03E-01 | 3,036,158 |
| 2.21E-10 | 0    | 8.35E-01 | 3,036,702 |
| 2.24E-10 | 0    | 6.29E-01 | 3,037,499 |
| 2.24E-10 | 8.2  | 2.96E-01 | 3,009,498 |
| 2.25E-10 | 0    | 5.50E-01 | 3,034,989 |
| 2.26E-10 | 0    | 8.81E-01 | 3,021,552 |
| 2.28E-10 | 22   | 5.69E-02 | 3,036,702 |
| 2.28E-10 | 21.7 | 5.99E-02 | 3,036,702 |
| 2.30E-10 | 0    | 5.98E-01 | 3,011,203 |
| 2.30E-10 | 0    | 9.96E-01 | 3,037,499 |
| 2.33E-10 | 2.9  | 4.09E-01 | 3,036,702 |
| 2.33E-10 | 31.8 | 1.59E-02 | 2,997,329 |
| 2.34E-10 | 0    | 9.47E-01 | 3,036,702 |
| 2.37E-10 | 0    | 6.21E-01 | 3,037,499 |
| 2.37E-10 | 4.6  | 3.69E-01 | 3,024,163 |
| 2.37E-10 | 3.4  | 3.98E-01 | 3,037,499 |
| 2.39E-10 | 6.6  | 3.20E-01 | 3,037,499 |
| 2.39E-10 | 0    | 8.74E-01 | 3,037,499 |
| 2.40E-10 | 22.6 | 5.18E-02 | 3,035,786 |
| 2.41E-10 | 0    | 5.18E-01 | 3,010,513 |
| 2.44E-10 | 0    | 5.57E-01 | 3,035,242 |
| 2.45E-10 | 6.3  | 3.28E-01 | 3,035,786 |
| 2.45E-10 | 0    | 5.30E-01 | 3,024,960 |
| 2.46E-10 | 11.8 | 2.38E-01 | 2,955,312 |
| 2.46E-10 | 18.4 | 9.98E-02 | 3,036,158 |
| 2.48E-10 | 2.8  | 4.14E-01 | 3,008,726 |
| 2.49E-10 | 0    | 7.18E-01 | 3,035,786 |
| 2.49E-10 | 0    | 9.33E-01 | 3,036,158 |

|          |      |          |           |
|----------|------|----------|-----------|
| 2.49E-10 | 14.6 | 1.60E-01 | 3,032,556 |
| 2.50E-10 | 5.8  | 3.41E-01 | 3,035,786 |
| 2.51E-10 | 0    | 9.90E-01 | 3,014,348 |
| 2.51E-10 | 0    | 9.24E-01 | 3,036,955 |
| 2.53E-10 | 19.5 | 8.42E-02 | 3,035,786 |
| 2.53E-10 | 0    | 7.50E-01 | 3,035,066 |
| 2.54E-10 | 21.7 | 5.97E-02 | 3,036,702 |
| 2.56E-10 | 5.3  | 3.53E-01 | 3,033,840 |
| 2.56E-10 | 13.5 | 1.83E-01 | 3,017,704 |
| 2.56E-10 | 0    | 9.73E-01 | 3,035,788 |
| 2.57E-10 | 12.2 | 2.98E-01 | 2,870,804 |
| 2.57E-10 | 13.2 | 1.85E-01 | 3,023,619 |
| 2.59E-10 | 0    | 6.99E-01 | 3,035,786 |
| 2.59E-10 | 0    | 9.64E-01 | 2,581,318 |
| 2.60E-10 | 9.6  | 2.62E-01 | 3,019,936 |
| 2.61E-10 | 0    | 8.04E-01 | 3,023,265 |
| 2.62E-10 | 23.6 | 4.34E-02 | 3,036,702 |
| 2.67E-10 | 0    | 6.17E-01 | 3,037,499 |
| 2.68E-10 | 0    | 8.13E-01 | 3,022,439 |
| 2.69E-10 | 0    | 7.82E-01 | 2,950,379 |
| 2.70E-10 | 19.6 | 8.84E-02 | 3,028,218 |
| 2.70E-10 | 3.8  | 3.89E-01 | 3,012,107 |
| 2.72E-10 | 0    | 6.25E-01 | 3,033,686 |
| 2.72E-10 | 22.8 | 4.99E-02 | 3,036,702 |
| 2.73E-10 | 22.1 | 5.61E-02 | 3,035,786 |
| 2.74E-10 | 0    | 7.51E-01 | 2,891,467 |
| 2.76E-10 | 0    | 8.78E-01 | 2,861,824 |
| 2.79E-10 | 0    | 6.18E-01 | 2,141,831 |
| 2.79E-10 | 5.4  | 3.61E-01 | 2,995,452 |
| 2.80E-10 | 0    | 5.71E-01 | 3,037,499 |
| 2.80E-10 | 0    | 6.41E-01 | 2,995,653 |
| 2.81E-10 | 0    | 7.16E-01 | 3,036,702 |
| 2.84E-10 | 0    | 4.93E-01 | 3,033,547 |
| 2.87E-10 | 11.6 | 2.16E-01 | 3,036,585 |
| 2.90E-10 | 1.8  | 4.35E-01 | 3,037,499 |
| 2.90E-10 | 1    | 4.55E-01 | 3,035,786 |
| 2.91E-10 | 0    | 6.06E-01 | 3,037,499 |
| 2.91E-10 | 0    | 5.42E-01 | 3,037,499 |
| 2.96E-10 | 18.9 | 9.45E-02 | 3,021,301 |
| 2.96E-10 | 14.5 | 1.56E-01 | 3,037,499 |
| 2.96E-10 | 0    | 5.34E-01 | 3,034,075 |
| 2.96E-10 | 0    | 7.99E-01 | 2,990,146 |
| 2.97E-10 | 0.3  | 4.71E-01 | 3,037,499 |
| 2.98E-10 | 0    | 9.68E-01 | 3,037,499 |
| 2.99E-10 | 0    | 8.62E-01 | 3,035,786 |
| 3.00E-10 | 0    | 8.74E-01 | 3,036,702 |
| 3.05E-10 | 6.6  | 3.22E-01 | 3,036,702 |
| 3.05E-10 | 14.7 | 1.55E-01 | 3,035,786 |

|          |      |          |           |
|----------|------|----------|-----------|
| 3.06E-10 | 0.4  | 4.67E-01 | 3,037,499 |
| 3.07E-10 | 0    | 7.02E-01 | 3,036,702 |
| 3.08E-10 | 0    | 6.73E-01 | 3,036,158 |
| 3.08E-10 | 0    | 8.52E-01 | 3,037,499 |
| 3.08E-10 | 0    | 9.33E-01 | 3,000,868 |
| 3.09E-10 | 5.1  | 3.57E-01 | 3,035,786 |
| 3.10E-10 | 26.4 | 2.54E-02 | 3,036,702 |
| 3.11E-10 | 0    | 5.13E-01 | 3,036,702 |
| 3.15E-10 | 0    | 7.82E-01 | 3,035,353 |
| 3.16E-10 | 0    | 5.59E-01 | 3,004,065 |
| 3.16E-10 | 0    | 5.69E-01 | 3,036,585 |
| 3.16E-10 | 7.4  | 3.07E-01 | 3,022,450 |
| 3.19E-10 | 0    | 9.12E-01 | 3,011,376 |
| 3.21E-10 | 5    | 3.63E-01 | 3,013,726 |
| 3.22E-10 | 23.7 | 4.42E-02 | 3,034,989 |
| 3.27E-10 | 13.2 | 1.82E-01 | 3,035,786 |
| 3.28E-10 | 0    | 8.55E-01 | 3,037,499 |
| 3.30E-10 | 0    | 5.65E-01 | 2,997,268 |
| 3.31E-10 | 14.5 | 1.57E-01 | 3,037,499 |
| 3.32E-10 | 13.3 | 1.80E-01 | 3,035,786 |
| 3.34E-10 | 12.4 | 1.97E-01 | 3,000,868 |
| 3.34E-10 | 2.4  | 4.23E-01 | 3,020,755 |
| 3.35E-10 | 0    | 9.38E-01 | 3,030,578 |
| 3.36E-10 | 0    | 7.54E-01 | 3,037,499 |
| 3.36E-10 | 6.3  | 3.28E-01 | 3,037,499 |
| 3.37E-10 | 0    | 7.79E-01 | 3,034,989 |
| 3.39E-10 | 3.2  | 4.01E-01 | 3,035,786 |
| 3.42E-10 | 0    | 6.83E-01 | 3,027,547 |
| 3.43E-10 | 10.3 | 2.38E-01 | 3,037,499 |
| 3.44E-10 | 0    | 8.58E-01 | 3,037,499 |
| 3.45E-10 | 5.8  | 3.40E-01 | 3,037,499 |
| 3.46E-10 | 9    | 2.72E-01 | 3,019,119 |
| 3.48E-10 | 20.6 | 7.20E-02 | 3,035,786 |
| 3.50E-10 | 0    | 5.33E-01 | 2,982,356 |
| 3.52E-10 | 11.3 | 2.23E-01 | 3,032,323 |
| 3.53E-10 | 0    | 7.76E-01 | 3,037,499 |
| 3.55E-10 | 20.2 | 7.48E-02 | 3,037,499 |
| 3.56E-10 | 10.2 | 2.45E-01 | 3,019,978 |
| 3.58E-10 | 24.2 | 3.90E-02 | 3,036,702 |
| 3.59E-10 | 18.2 | 1.32E-01 | 2,978,081 |
| 3.60E-10 | 26.2 | 2.66E-02 | 3,036,702 |
| 3.62E-10 | 5.3  | 3.52E-01 | 3,036,702 |
| 3.62E-10 | 0    | 7.81E-01 | 3,036,955 |
| 3.63E-10 | 17.2 | 1.14E-01 | 3,037,499 |
| 3.66E-10 | 0    | 9.59E-01 | 3,036,702 |
| 3.67E-10 | 0    | 8.86E-01 | 3,035,786 |
| 3.68E-10 | 13.4 | 1.78E-01 | 3,036,702 |
| 3.70E-10 | 17.2 | 1.13E-01 | 3,037,499 |

|          |      |          |           |
|----------|------|----------|-----------|
| 3.71E-10 | 0    | 7.38E-01 | 3,037,499 |
| 3.71E-10 | 8.6  | 2.76E-01 | 3,035,786 |
| 3.74E-10 | 16.4 | 1.29E-01 | 3,036,158 |
| 3.78E-10 | 0    | 9.85E-01 | 3,035,786 |
| 3.80E-10 | 26.2 | 3.31E-02 | 3,013,580 |
| 3.80E-10 | 14.6 | 1.57E-01 | 3,035,786 |
| 3.82E-10 | 7.2  | 3.07E-01 | 3,036,702 |
| 3.84E-10 | 0    | 1.00E+00 | 2,272,216 |
| 3.84E-10 | 0    | 9.61E-01 | 3,005,081 |
| 3.85E-10 | 0    | 9.37E-01 | 3,036,332 |
| 3.85E-10 | 11.6 | 2.12E-01 | 3,037,499 |
| 3.87E-10 | 0    | 7.32E-01 | 3,024,163 |
| 3.87E-10 | 1.9  | 4.33E-01 | 3,035,786 |
| 3.91E-10 | 14.4 | 2.21E-01 | 2,951,440 |
| 3.92E-10 | 4.8  | 3.66E-01 | 3,016,527 |
| 4.00E-10 | 0    | 9.59E-01 | 3,036,702 |
| 4.02E-10 | 0    | 6.68E-01 | 3,029,814 |
| 4.02E-10 | 22.5 | 5.27E-02 | 3,036,702 |
| 4.04E-10 | 5.5  | 3.47E-01 | 3,037,499 |
| 4.05E-10 | 10.9 | 2.28E-01 | 3,021,382 |
| 4.06E-10 | 14.4 | 1.61E-01 | 3,036,332 |
| 4.07E-10 | 0.7  | 4.60E-01 | 3,037,499 |
| 4.08E-10 | 0    | 8.92E-01 | 3,037,499 |
| 4.10E-10 | 0    | 6.73E-01 | 3,037,499 |
| 4.11E-10 | 0.2  | 4.72E-01 | 3,016,120 |
| 4.12E-10 | 0    | 6.29E-01 | 3,035,242 |
| 4.12E-10 | 25.9 | 5.31E-02 | 2,984,084 |
| 4.17E-10 | 27.5 | 1.93E-02 | 3,037,499 |
| 4.20E-10 | 0    | 6.73E-01 | 3,037,499 |
| 4.20E-10 | 33.1 | 1.18E-02 | 2,956,820 |
| 4.21E-10 | 10.4 | 2.37E-01 | 3,034,230 |
| 4.23E-10 | 4.5  | 3.70E-01 | 3,036,702 |
| 4.25E-10 | 0    | 8.01E-01 | 3,029,787 |
| 4.27E-10 | 11.5 | 2.28E-01 | 2,575,131 |
| 4.27E-10 | 0    | 8.62E-01 | 3,032,556 |
| 4.27E-10 | 0    | 5.00E-01 | 3,036,955 |
| 4.30E-10 | 0    | 8.75E-01 | 2,948,801 |
| 4.32E-10 | 10.1 | 2.43E-01 | 3,035,786 |
| 4.33E-10 | 10.6 | 2.34E-01 | 3,036,702 |
| 4.34E-10 | 0    | 7.26E-01 | 3,037,499 |
| 4.35E-10 | 0    | 8.47E-01 | 3,036,702 |
| 4.36E-10 | 7    | 3.66E-01 | 2,152,802 |
| 4.43E-10 | 12.9 | 1.91E-01 | 3,031,119 |
| 4.43E-10 | 15.5 | 1.46E-01 | 3,020,270 |
| 4.46E-10 | 0    | 9.15E-01 | 3,023,247 |
| 4.49E-10 | 0.5  | 4.66E-01 | 3,019,708 |
| 4.50E-10 | 16.2 | 1.35E-01 | 3,033,752 |
| 4.55E-10 | 13.5 | 1.76E-01 | 3,024,960 |

|          |      |          |           |
|----------|------|----------|-----------|
| 4.56E-10 | 24.4 | 6.79E-02 | 2,884,233 |
| 4.60E-10 | 0    | 5.85E-01 | 3,034,269 |
| 4.60E-10 | 0    | 9.53E-01 | 3,037,499 |
| 4.62E-10 | 4.4  | 3.73E-01 | 3,035,786 |
| 4.63E-10 | 14.2 | 2.24E-01 | 2,948,566 |
| 4.63E-10 | 0    | 5.06E-01 | 3,034,230 |
| 4.66E-10 | 0    | 6.84E-01 | 3,033,316 |
| 4.69E-10 | 21.2 | 6.79E-02 | 3,029,534 |
| 4.70E-10 | 17.1 | 1.18E-01 | 3,024,163 |
| 4.70E-10 | 22.2 | 5.53E-02 | 3,035,786 |
| 4.72E-10 | 0    | 5.13E-01 | 3,033,353 |
| 4.76E-10 | 15.9 | 1.36E-01 | 2,998,922 |
| 4.77E-10 | 10.7 | 2.90E-01 | 2,949,752 |
| 4.77E-10 | 20   | 7.97E-02 | 3,022,527 |
| 4.78E-10 | 1    | 4.54E-01 | 3,036,955 |
| 4.79E-10 | 0    | 7.32E-01 | 651,521   |
| 4.82E-10 | 0    | 9.10E-01 | 3,036,158 |
| 4.87E-10 | 13.1 | 2.04E-01 | 3,016,750 |
| 4.89E-10 | 18.2 | 1.03E-01 | 3,036,158 |
| 4.92E-10 | 0.4  | 4.68E-01 | 3,034,756 |
| 4.92E-10 | 0    | 9.78E-01 | 3,036,702 |
| 4.94E-10 | 3.4  | 4.13E-01 | 2,937,394 |
| 5.00E-10 | 0    | 6.21E-01 | 2,997,741 |
| 5.02E-10 | 17.7 | 1.39E-01 | 2,924,143 |
| 5.03E-10 | 39.4 | 6.56E-04 | 3,022,450 |
| 5.06E-10 | 5    | 3.62E-01 | 3,027,251 |
| 5.07E-10 | 0    | 7.70E-01 | 3,036,657 |
| 5.08E-10 | 26.6 | 2.35E-02 | 3,037,499 |
| 5.12E-10 | 19.9 | 8.71E-02 | 3,033,500 |
| 5.16E-10 | 0    | 5.95E-01 | 3,035,066 |
| 5.19E-10 | 0.8  | 4.59E-01 | 3,037,499 |
| 5.19E-10 | 0    | 6.72E-01 | 2,998,435 |
| 5.20E-10 | 0    | 1.00E+00 | 2,272,216 |
| 5.29E-10 | 21.6 | 6.39E-02 | 3,034,212 |
| 5.32E-10 | 26.2 | 2.59E-02 | 3,037,499 |
| 5.37E-10 | 0    | 5.36E-01 | 3,003,951 |
| 5.37E-10 | 0    | 4.79E-01 | 3,037,499 |
| 5.42E-10 | 8.4  | 2.85E-01 | 3,033,547 |
| 5.44E-10 | 0    | 8.26E-01 | 3,037,499 |
| 5.44E-10 | 0    | 7.50E-01 | 2,847,135 |
| 5.46E-10 | 1.8  | 4.36E-01 | 3,037,499 |
| 5.46E-10 | 13.1 | 1.82E-01 | 3,037,499 |
| 5.47E-10 | 9.2  | 2.62E-01 | 3,037,499 |
| 5.47E-10 | 0    | 7.24E-01 | 3,036,702 |
| 5.50E-10 | 22.3 | 5.60E-02 | 3,024,163 |
| 5.55E-10 | 6.2  | 3.31E-01 | 3,037,499 |
| 5.58E-10 | 8.9  | 2.69E-01 | 3,037,499 |
| 5.59E-10 | 8.2  | 3.28E-01 | 2,948,340 |

|          |      |          |           |
|----------|------|----------|-----------|
| 5.72E-10 | 29.1 | 4.97E-02 | 2,948,133 |
| 5.75E-10 | 24.1 | 4.22E-02 | 2,998,358 |
| 5.78E-10 | 0    | 5.67E-01 | 2,998,358 |
| 5.81E-10 | 0    | 5.39E-01 | 3,036,702 |
| 5.85E-10 | 23.2 | 4.57E-02 | 3,037,499 |
| 5.86E-10 | 0    | 7.94E-01 | 3,037,499 |
| 5.86E-10 | 24.5 | 3.76E-02 | 3,032,982 |
| 5.87E-10 | 0    | 6.93E-01 | 3,035,786 |
| 5.89E-10 | 0    | 7.60E-01 | 3,016,995 |
| 5.89E-10 | 0    | 4.91E-01 | 3,020,622 |
| 5.90E-10 | 0    | 6.15E-01 | 3,035,242 |
| 5.98E-10 | 0    | 7.50E-01 | 3,037,499 |
| 5.98E-10 | 16.3 | 1.28E-01 | 3,036,702 |
| 6.03E-10 | 24.2 | 3.90E-02 | 3,035,786 |
| 6.04E-10 | 3.3  | 3.98E-01 | 3,037,499 |
| 6.11E-10 | 0    | 6.57E-01 | 3,034,989 |
| 6.15E-10 | 19.7 | 8.50E-02 | 3,020,814 |
| 6.16E-10 | 0    | 6.14E-01 | 3,037,499 |
| 6.16E-10 | 0    | 5.26E-01 | 3,037,499 |
| 6.18E-10 | 0    | 5.75E-01 | 3,035,880 |
| 6.19E-10 | 17.3 | 1.22E-01 | 3,016,631 |
| 6.23E-10 | 22.1 | 5.61E-02 | 3,035,679 |
| 6.35E-10 | 0    | 7.99E-01 | 3,037,499 |
| 6.46E-10 | 0    | 9.47E-01 | 3,035,679 |
| 6.47E-10 | 0    | 7.39E-01 | 3,035,242 |
| 6.49E-10 | 0    | 7.40E-01 | 3,036,702 |
| 6.52E-10 | 10.8 | 2.45E-01 | 2,996,034 |
| 6.53E-10 | 13.2 | 1.80E-01 | 3,037,499 |
| 6.55E-10 | 0    | 8.52E-01 | 3,034,269 |
| 6.55E-10 | 7.4  | 3.04E-01 | 3,035,786 |
| 6.56E-10 | 25   | 3.29E-02 | 3,037,499 |
| 6.62E-10 | 5.6  | 3.45E-01 | 3,035,786 |
| 6.67E-10 | 0    | 6.01E-01 | 3,037,499 |
| 6.83E-10 | 0    | 9.62E-01 | 2,995,324 |
| 6.84E-10 | 0    | 7.12E-01 | 3,036,702 |
| 6.86E-10 | 14.2 | 1.79E-01 | 3,017,092 |
| 6.90E-10 | 0    | 7.23E-01 | 3,032,323 |
| 6.91E-10 | 0    | 8.58E-01 | 3,037,499 |
| 6.99E-10 | 10.5 | 2.36E-01 | 3,035,786 |
| 7.05E-10 | 0    | 8.13E-01 | 2,867,659 |
| 7.05E-10 | 0    | 5.39E-01 | 2,997,544 |
| 7.12E-10 | 2.2  | 4.25E-01 | 3,037,499 |
| 7.13E-10 | 8.8  | 2.76E-01 | 3,031,603 |
| 7.18E-10 | 0    | 5.59E-01 | 3,036,158 |
| 7.25E-10 | 22.4 | 6.13E-02 | 3,012,031 |
| 7.27E-10 | 0    | 7.71E-01 | 3,033,316 |
| 7.28E-10 | 0    | 5.17E-01 | 3,036,702 |
| 7.28E-10 | 0    | 5.88E-01 | 3,036,702 |

|          |      |          |           |
|----------|------|----------|-----------|
| 7.32E-10 | 0    | 5.98E-01 | 3,037,499 |
| 7.37E-10 | 26.4 | 2.45E-02 | 3,037,499 |
| 7.40E-10 | 11.2 | 2.22E-01 | 3,035,553 |
| 7.48E-10 | 4.8  | 3.66E-01 | 3,029,854 |
| 7.49E-10 | 18.5 | 2.37E-01 | 2,864,858 |
| 7.52E-10 | 41.6 | 7.16E-02 | 2,819,190 |
| 7.52E-10 | 0    | 6.22E-01 | 3,037,499 |
| 7.54E-10 | 18.5 | 9.52E-02 | 3,037,499 |
| 7.55E-10 | 0    | 8.77E-01 | 3,035,066 |
| 7.57E-10 | 0    | 6.09E-01 | 3,035,804 |
| 7.57E-10 | 0    | 5.23E-01 | 2,982,077 |
| 7.58E-10 | 0.9  | 4.55E-01 | 2,977,436 |
| 7.59E-10 | 0    | 8.76E-01 | 3,035,786 |
| 7.59E-10 | 0    | 9.88E-01 | 3,036,702 |
| 7.62E-10 | 0    | 9.12E-01 | 3,035,786 |
| 7.64E-10 | 0    | 8.57E-01 | 3,036,702 |
| 7.67E-10 | 0.8  | 4.58E-01 | 3,013,546 |
| 7.68E-10 | 9.3  | 2.67E-01 | 3,017,733 |
| 7.68E-10 | 13.2 | 1.81E-01 | 3,037,499 |
| 7.68E-10 | 0    | 9.03E-01 | 2,914,187 |
| 7.69E-10 | 22.9 | 9.85E-02 | 2,985,186 |
| 7.70E-10 | 0    | 5.80E-01 | 3,036,702 |
| 7.70E-10 | 0    | 9.48E-01 | 3,000,474 |
| 7.71E-10 | 0    | 6.94E-01 | 3,011,890 |
| 7.74E-10 | 26.9 | 2.35E-02 | 3,032,517 |
| 7.75E-10 | 0    | 8.36E-01 | 3,034,989 |
| 7.76E-10 | 0    | 6.30E-01 | 3,036,702 |
| 7.76E-10 | 9.9  | 2.48E-01 | 3,035,066 |
| 7.82E-10 | 0    | 8.82E-01 | 3,036,955 |
| 7.85E-10 | 0    | 7.38E-01 | 3,036,955 |
| 7.95E-10 | 0    | 7.61E-01 | 3,034,989 |
| 7.98E-10 | 0    | 1.00E+00 | 2,272,216 |
| 8.00E-10 | 15.2 | 1.45E-01 | 3,037,499 |
| 8.03E-10 | 16.8 | 1.23E-01 | 3,035,242 |
| 8.08E-10 | 18.4 | 9.86E-02 | 3,036,702 |
| 8.13E-10 | 21.2 | 6.39E-02 | 3,037,499 |
| 8.13E-10 | 21.9 | 5.85E-02 | 3,035,786 |
| 8.17E-10 | 28.8 | 1.50E-02 | 3,036,612 |
| 8.23E-10 | 16.4 | 1.25E-01 | 3,037,499 |
| 8.24E-10 | 8.3  | 2.84E-01 | 3,033,353 |
| 8.24E-10 | 2    | 4.30E-01 | 3,035,242 |
| 8.25E-10 | 1.1  | 4.51E-01 | 3,037,499 |
| 8.29E-10 | 0    | 7.28E-01 | 3,037,499 |
| 8.30E-10 | 6.6  | 3.23E-01 | 3,035,416 |
| 8.31E-10 | 24.3 | 4.97E-02 | 3,008,701 |
| 8.33E-10 | 15.7 | 1.38E-01 | 3,032,666 |
| 8.53E-10 | 22.2 | 7.35E-02 | 2,993,136 |
| 8.53E-10 | 8.3  | 2.83E-01 | 3,036,955 |



|          |      |          |           |
|----------|------|----------|-----------|
| 8.62E-10 | 14.1 | 1.67E-01 | 3,034,989 |
| 8.62E-10 | 0    | 5.08E-01 | 3,033,296 |
| 8.68E-10 | 0    | 7.76E-01 | 3,024,163 |
| 8.71E-10 | 3.1  | 4.03E-01 | 3,035,679 |
| 8.74E-10 | 0    | 7.48E-01 | 2,996,816 |
| 8.75E-10 | 0    | 6.56E-01 | 3,034,269 |
| 8.76E-10 | 4.4  | 3.74E-01 | 3,037,499 |
| 8.76E-10 | 6.9  | 3.14E-01 | 3,036,702 |
| 8.78E-10 | 0    | 8.41E-01 | 3,036,702 |
| 8.79E-10 | 2.3  | 4.23E-01 | 3,037,499 |
| 8.85E-10 | 0    | 9.17E-01 | 3,037,499 |
| 8.87E-10 | 0    | 6.34E-01 | 3,017,783 |
| 8.96E-10 | 0    | 4.85E-01 | 3,021,301 |
| 8.97E-10 | 0    | 6.37E-01 | 3,037,499 |
| 9.01E-10 | 0    | 4.91E-01 | 3,037,499 |
| 9.01E-10 | 17.7 | 1.10E-01 | 3,023,247 |
| 9.01E-10 | 0    | 8.39E-01 | 3,037,499 |
| 9.03E-10 | 0    | 8.69E-01 | 3,035,786 |
| 9.10E-10 | 12.2 | 2.12E-01 | 3,022,856 |
| 9.12E-10 | 6.1  | 3.48E-01 | 2,990,725 |
| 9.14E-10 | 0    | 6.01E-01 | 3,035,786 |
| 9.14E-10 | 0    | 8.93E-01 | 2,988,541 |
| 9.14E-10 | 0    | 6.60E-01 | 3,024,416 |
| 9.23E-10 | 2.2  | 4.25E-01 | 3,034,756 |
| 9.27E-10 | 15.4 | 1.52E-01 | 3,012,861 |
| 9.28E-10 | 1.4  | 4.44E-01 | 3,035,786 |
| 9.31E-10 | 0    | 6.39E-01 | 3,034,989 |
| 9.33E-10 | 0    | 9.27E-01 | 3,031,658 |
| 9.34E-10 | 0    | 6.58E-01 | 3,031,658 |
| 9.34E-10 | 27.9 | 1.83E-02 | 3,036,955 |
| 9.38E-10 | 7.8  | 3.21E-01 | 2,936,691 |
| 9.40E-10 | 2.6  | 4.15E-01 | 3,036,702 |
| 9.45E-10 | 9.3  | 2.62E-01 | 3,036,702 |
| 9.52E-10 | 0    | 9.33E-01 | 2,977,790 |
| 9.54E-10 | 4.4  | 3.74E-01 | 3,036,702 |
| 9.54E-10 | 16.3 | 1.33E-01 | 3,034,893 |
| 9.59E-10 | 1.8  | 4.36E-01 | 3,026,131 |
| 9.63E-10 | 19.8 | 9.13E-02 | 3,014,256 |
| 9.64E-10 | 0    | 1.00E+00 | 2,272,216 |
| 9.64E-10 | 0    | 6.44E-01 | 2,834,207 |
| 9.65E-10 | 5.3  | 3.53E-01 | 3,037,499 |
| 9.75E-10 | 26   | 2.67E-02 | 3,037,499 |
| 9.77E-10 | 0    | 5.54E-01 | 3,037,499 |
| 9.84E-10 | 0    | 7.16E-01 | 3,022,360 |
| 9.93E-10 | 0    | 6.36E-01 | 3,035,786 |
| 1.01E-09 | 23.5 | 4.46E-02 | 3,036,702 |
| 1.01E-09 | 20.9 | 8.67E-02 | 3,001,635 |
| 1.01E-09 | 0    | 8.04E-01 | 3,036,955 |

|          |      |          |           |
|----------|------|----------|-----------|
| 1.01E-09 | 8.6  | 2.84E-01 | 3,021,554 |
| 1.02E-09 | 0    | 7.01E-01 | 3,037,499 |
| 1.03E-09 | 0    | 7.12E-01 | 3,034,230 |
| 1.03E-09 | 0    | 7.93E-01 | 3,034,989 |
| 1.04E-09 | 0.8  | 4.59E-01 | 3,025,101 |
| 1.05E-09 | 0    | 5.54E-01 | 3,036,158 |
| 1.05E-09 | 0    | 5.25E-01 | 3,024,960 |
| 1.06E-09 | 0    | 5.30E-01 | 3,018,668 |
| 1.06E-09 | 0    | 8.22E-01 | 3,035,066 |
| 1.06E-09 | 11.4 | 2.17E-01 | 3,036,702 |
| 1.06E-09 | 0    | 7.48E-01 | 3,036,702 |
| 1.06E-09 | 0    | 6.89E-01 | 3,024,960 |
| 1.07E-09 | 17.6 | 1.10E-01 | 3,035,066 |
| 1.07E-09 | 0    | 6.56E-01 | 3,020,755 |
| 1.07E-09 | 3.5  | 3.94E-01 | 3,035,786 |
| 1.08E-09 | 38   | 2.47E-02 | 2,875,934 |
| 1.09E-09 | 12.4 | 1.98E-01 | 3,023,247 |
| 1.09E-09 | 27.6 | 9.75E-02 | 2,859,265 |
| 1.09E-09 | 0    | 9.82E-01 | 2,992,610 |
| 1.10E-09 | 11.7 | 2.10E-01 | 3,037,499 |
| 1.10E-09 | 0    | 7.85E-01 | 3,037,499 |
| 1.11E-09 | 0    | 7.41E-01 | 3,037,499 |
| 1.12E-09 | 0    | 6.78E-01 | 3,018,726 |
| 1.12E-09 | 0    | 7.05E-01 | 3,037,499 |
| 1.12E-09 | 5    | 3.59E-01 | 3,036,955 |
| 1.12E-09 | 19.8 | 9.28E-02 | 2,551,741 |
| 1.13E-09 | 4.6  | 3.68E-01 | 3,036,702 |
| 1.13E-09 | 0    | 7.09E-01 | 3,037,499 |
| 1.14E-09 | 0    | 7.43E-01 | 3,035,786 |
| 1.14E-09 | 11.9 | 2.06E-01 | 3,036,702 |
| 1.14E-09 | 0    | 3.82E-01 | 2,713,337 |
| 1.14E-09 | 0    | 5.26E-01 | 3,007,829 |
| 1.15E-09 | 2.3  | 4.23E-01 | 3,036,702 |
| 1.16E-09 | 18   | 1.07E-01 | 3,033,296 |
| 1.16E-09 | 0    | 6.70E-01 | 3,037,499 |
| 1.16E-09 | 26.3 | 6.54E-02 | 2,950,899 |
| 1.18E-09 | 0    | 6.20E-01 | 3,019,130 |
| 1.18E-09 | 18.2 | 9.98E-02 | 3,037,499 |
| 1.19E-09 | 2.1  | 4.29E-01 | 3,020,387 |
| 1.20E-09 | 11.4 | 2.15E-01 | 3,037,499 |
| 1.22E-09 | 0    | 5.42E-01 | 3,036,702 |
| 1.22E-09 | 0    | 5.54E-01 | 3,013,117 |
| 1.22E-09 | 0    | 6.70E-01 | 2,996,722 |
| 1.23E-09 | 0    | 6.27E-01 | 3,033,316 |
| 1.23E-09 | 15.8 | 1.36E-01 | 3,037,499 |
| 1.23E-09 | 0    | 7.05E-01 | 2,713,337 |
| 1.24E-09 | 0    | 5.30E-01 | 3,033,353 |
| 1.25E-09 | 0    | 8.43E-01 | 2,922,448 |

|          |      |          |           |
|----------|------|----------|-----------|
| 1.25E-09 | 0    | 5.68E-01 | 3,037,499 |
| 1.25E-09 | 0    | 9.14E-01 | 3,035,786 |
| 1.26E-09 | 0    | 6.16E-01 | 3,034,872 |
| 1.26E-09 | 19.5 | 8.32E-02 | 3,037,499 |
| 1.26E-09 | 1.6  | 4.41E-01 | 3,002,421 |
| 1.27E-09 | 16   | 1.32E-01 | 3,037,499 |
| 1.27E-09 | 0    | 9.99E-01 | 3,037,499 |
| 1.28E-09 | 27.2 | 2.15E-02 | 3,035,786 |
| 1.29E-09 | 9.2  | 2.63E-01 | 3,037,499 |
| 1.29E-09 | 1.8  | 4.36E-01 | 3,005,448 |
| 1.30E-09 | 0    | 7.35E-01 | 2,875,486 |
| 1.30E-09 | 6.5  | 3.30E-01 | 3,017,463 |
| 1.30E-09 | 0    | 8.87E-01 | 3,036,702 |
| 1.30E-09 | 0    | 5.83E-01 | 3,037,499 |
| 1.30E-09 | 1.7  | 4.39E-01 | 2,859,882 |
| 1.30E-09 | 31.9 | 2.32E-02 | 2,988,740 |
| 1.30E-09 | 15   | 1.48E-01 | 3,037,499 |
| 1.31E-09 | 0    | 5.13E-01 | 3,036,702 |
| 1.32E-09 | 18.5 | 1.41E-01 | 2,975,148 |
| 1.33E-09 | 0    | 8.62E-01 | 2,985,140 |
| 1.34E-09 | 0    | 9.01E-01 | 2,991,761 |
| 1.34E-09 | 29.2 | 1.73E-02 | 3,006,525 |
| 1.35E-09 | 0    | 6.95E-01 | 2,958,881 |
| 1.35E-09 | 15.4 | 1.49E-01 | 3,018,344 |
| 1.35E-09 | 16.9 | 1.18E-01 | 3,037,499 |
| 1.35E-09 | 1.1  | 4.52E-01 | 3,036,702 |
| 1.36E-09 | 4.7  | 3.66E-01 | 3,036,702 |
| 1.36E-09 | 0    | 8.60E-01 | 3,024,960 |
| 1.38E-09 | 21.2 | 6.50E-02 | 3,036,702 |
| 1.39E-09 | 24.8 | 3.38E-02 | 3,037,499 |
| 1.39E-09 | 0    | 6.89E-01 | 3,037,499 |
| 1.40E-09 | 17.1 | 1.59E-01 | 2,975,582 |
| 1.40E-09 | 7.9  | 2.95E-01 | 3,034,091 |
| 1.40E-09 | 24.1 | 4.11E-02 | 3,036,158 |
| 1.41E-09 | 3.4  | 3.98E-01 | 3,034,989 |
| 1.41E-09 | 0    | 7.12E-01 | 3,032,666 |
| 1.41E-09 | 0    | 6.45E-01 | 3,037,499 |
| 1.42E-09 | 14.2 | 1.62E-01 | 3,037,499 |
| 1.42E-09 | 0    | 6.66E-01 | 3,018,431 |
| 1.43E-09 | 0    | 9.83E-01 | 3,037,499 |
| 1.43E-09 | 3.5  | 3.94E-01 | 3,037,499 |
| 1.44E-09 | 12.9 | 1.86E-01 | 3,037,499 |
| 1.44E-09 | 0    | 9.88E-01 | 3,034,989 |
| 1.45E-09 | 9.8  | 2.65E-01 | 2,999,725 |
| 1.45E-09 | 0.2  | 4.73E-01 | 3,034,230 |
| 1.46E-09 | 27.9 | 4.50E-02 | 2,965,930 |
| 1.46E-09 | 0    | 8.98E-01 | 3,037,499 |
| 1.46E-09 | 16.3 | 1.45E-01 | 3,010,542 |

|          |      |          |           |
|----------|------|----------|-----------|
| 1.47E-09 | 0    | 9.14E-01 | 3,024,046 |
| 1.47E-09 | 0    | 9.77E-01 | 3,037,499 |
| 1.48E-09 | 6    | 3.45E-01 | 3,024,031 |
| 1.49E-09 | 21.5 | 6.19E-02 | 3,036,702 |
| 1.49E-09 | 0    | 9.16E-01 | 3,036,955 |
| 1.49E-09 | 0    | 8.85E-01 | 3,037,499 |
| 1.49E-09 | 0    | 5.91E-01 | 3,032,284 |
| 1.50E-09 | 0    | 7.84E-01 | 3,028,583 |
| 1.51E-09 | 0    | 9.64E-01 | 3,024,416 |
| 1.51E-09 | 1.8  | 4.36E-01 | 3,019,064 |
| 1.51E-09 | 24.3 | 3.75E-02 | 3,037,499 |
| 1.52E-09 | 0    | 9.67E-01 | 3,035,786 |
| 1.52E-09 | 0    | 6.20E-01 | 3,023,247 |
| 1.53E-09 | 0    | 8.54E-01 | 3,025,737 |
| 1.53E-09 | 15.7 | 1.40E-01 | 3,034,989 |
| 1.54E-09 | 16.7 | 1.30E-01 | 3,030,714 |
| 1.54E-09 | 19.2 | 8.75E-02 | 3,035,786 |
| 1.55E-09 | 10.8 | 2.30E-01 | 3,035,242 |
| 1.55E-09 | 0    | 4.93E-01 | 3,008,547 |
| 1.55E-09 | 0    | 4.82E-01 | 3,037,499 |
| 1.56E-09 | 11.6 | 2.12E-01 | 3,037,499 |
| 1.57E-09 | 20.5 | 7.30E-02 | 3,035,786 |
| 1.57E-09 | 0.3  | 4.70E-01 | 3,027,523 |
| 1.57E-09 | 0    | 6.56E-01 | 3,030,172 |
| 1.57E-09 | 0    | 6.29E-01 | 3,037,499 |
| 1.58E-09 | 1.8  | 4.36E-01 | 3,035,671 |
| 1.58E-09 | 0    | 6.10E-01 | 3,037,499 |
| 1.59E-09 | 0    | 5.48E-01 | 3,036,702 |
| 1.59E-09 | 0    | 7.89E-01 | 2,953,845 |
| 1.59E-09 | 15.1 | 1.46E-01 | 3,037,499 |
| 1.60E-09 | 3.6  | 3.92E-01 | 3,032,809 |
| 1.62E-09 | 0    | 9.81E-01 | 3,035,804 |
| 1.62E-09 | 27.9 | 1.78E-02 | 3,037,499 |
| 1.63E-09 | 3.2  | 4.02E-01 | 3,036,702 |
| 1.64E-09 | 15.4 | 1.43E-01 | 3,035,553 |
| 1.64E-09 | 2.3  | 4.26E-01 | 2,955,287 |
| 1.64E-09 | 12.9 | 1.90E-01 | 3,021,301 |
| 1.64E-09 | 27.8 | 2.23E-02 | 3,015,350 |
| 1.65E-09 | 1.7  | 4.38E-01 | 3,037,499 |
| 1.65E-09 | 0    | 8.28E-01 | 3,037,499 |
| 1.65E-09 | 0    | 7.39E-01 | 3,032,924 |
| 1.67E-09 | 0    | 4.98E-01 | 3,037,499 |
| 1.68E-09 | 0    | 7.62E-01 | 3,035,786 |
| 1.68E-09 | 0    | 6.99E-01 | 2,899,330 |
| 1.69E-09 | 13.4 | 1.78E-01 | 3,037,499 |
| 1.70E-09 | 0    | 5.41E-01 | 3,037,499 |
| 1.70E-09 | 22.6 | 5.38E-02 | 3,032,809 |
| 1.71E-09 | 0    | 4.81E-01 | 3,037,499 |

|          |      |          |           |
|----------|------|----------|-----------|
| 1.71E-09 | 28.1 | 1.70E-02 | 3,037,499 |
| 1.71E-09 | 0    | 9.25E-01 | 3,037,499 |
| 1.71E-09 | 0    | 7.72E-01 | 3,033,316 |
| 1.71E-09 | 12.4 | 2.05E-01 | 3,016,064 |
| 1.72E-09 | 7.5  | 3.01E-01 | 3,036,702 |
| 1.72E-09 | 8.4  | 2.81E-01 | 3,036,955 |
| 1.73E-09 | 10.4 | 2.40E-01 | 3,034,445 |
| 1.76E-09 | 0    | 7.23E-01 | 3,036,702 |
| 1.76E-09 | 18.9 | 9.82E-02 | 3,029,838 |
| 1.78E-09 | 44.1 | 5.49E-05 | 3,037,499 |
| 1.80E-09 | 3.2  | 4.05E-01 | 3,008,784 |
| 1.81E-09 | 0    | 5.18E-01 | 3,037,499 |
| 1.81E-09 | 3.5  | 3.93E-01 | 3,037,499 |
| 1.82E-09 | 5.8  | 3.40E-01 | 3,037,499 |
| 1.82E-09 | 0    | 5.92E-01 | 2,816,039 |
| 1.83E-09 | 0    | 5.31E-01 | 2,965,374 |
| 1.84E-09 | 1    | 4.53E-01 | 3,034,269 |
| 1.84E-09 | 0    | 9.94E-01 | 3,035,786 |
| 1.85E-09 | 5.8  | 3.55E-01 | 3,016,452 |
| 1.86E-09 | 9.1  | 2.66E-01 | 3,000,868 |
| 1.86E-09 | 13.9 | 1.68E-01 | 3,036,702 |
| 1.86E-09 | 12.8 | 2.41E-01 | 2,979,418 |
| 1.87E-09 | 0    | 9.31E-01 | 3,020,777 |
| 1.88E-09 | 16.6 | 1.24E-01 | 3,036,702 |
| 1.89E-09 | 2.3  | 4.25E-01 | 2,555,644 |
| 1.90E-09 | 14.4 | 1.60E-01 | 3,036,955 |
| 1.91E-09 | 0    | 6.41E-01 | 3,007,934 |
| 1.92E-09 | 0    | 8.99E-01 | 2,992,956 |
| 1.94E-09 | 0    | 6.39E-01 | 3,037,499 |
| 1.94E-09 | 22.5 | 5.30E-02 | 3,036,702 |
| 1.94E-09 | 6.4  | 3.27E-01 | 3,036,955 |
| 1.95E-09 | 3.6  | 3.94E-01 | 3,026,519 |
| 1.98E-09 | 0    | 6.54E-01 | 3,037,499 |
| 1.98E-09 | 5.3  | 3.51E-01 | 3,037,499 |
| 1.98E-09 | 11.1 | 2.27E-01 | 3,034,091 |
| 1.98E-09 | 0    | 9.58E-01 | 3,036,702 |
| 2.00E-09 | 0    | 1.00E+00 | 2,965,573 |
| 2.01E-09 | 1.4  | 4.45E-01 | 3,030,018 |
| 2.03E-09 | 0    | 9.24E-01 | 3,036,955 |
| 2.03E-09 | 0    | 9.85E-01 | 2,977,135 |
| 2.03E-09 | 38.8 | 3.34E-02 | 2,857,761 |
| 2.04E-09 | 0.7  | 4.61E-01 | 3,036,955 |
| 2.04E-09 | 24.8 | 3.42E-02 | 3,037,499 |
| 2.04E-09 | 13.6 | 1.78E-01 | 3,020,814 |
| 2.05E-09 | 23.9 | 4.36E-02 | 2,997,638 |
| 2.06E-09 | 0    | 8.49E-01 | 3,019,996 |
| 2.06E-09 | 0    | 8.51E-01 | 3,035,786 |
| 2.06E-09 | 11.1 | 2.23E-01 | 3,037,499 |

|          |      |          |           |
|----------|------|----------|-----------|
| 2.06E-09 | 4.7  | 3.67E-01 | 3,034,230 |
| 2.07E-09 | 0    | 5.29E-01 | 3,036,702 |
| 2.09E-09 | 15.1 | 1.47E-01 | 3,037,499 |
| 2.09E-09 | 2.6  | 4.17E-01 | 3,000,868 |
| 2.11E-09 | 0    | 6.71E-01 | 2,939,399 |
| 2.12E-09 | 15.7 | 1.46E-01 | 3,023,850 |
| 2.12E-09 | 0    | 5.84E-01 | 3,036,702 |
| 2.13E-09 | 9.6  | 2.55E-01 | 3,035,786 |
| 2.14E-09 | 19   | 8.85E-02 | 3,037,499 |
| 2.15E-09 | 0    | 9.78E-01 | 2,983,011 |
| 2.16E-09 | 4.8  | 3.64E-01 | 3,037,499 |
| 2.17E-09 | 8.1  | 2.86E-01 | 3,037,499 |
| 2.17E-09 | 0    | 7.61E-01 | 3,037,499 |
| 2.18E-09 | 24.9 | 3.49E-02 | 3,023,247 |
| 2.19E-09 | 3.7  | 3.90E-01 | 3,037,499 |
| 2.21E-09 | 0    | 6.28E-01 | 3,037,499 |
| 2.22E-09 | 21.9 | 5.81E-02 | 3,035,786 |
| 2.22E-09 | 0    | 7.86E-01 | 2,876,408 |
| 2.22E-09 | 0    | 9.15E-01 | 2,913,381 |
| 2.25E-09 | 10   | 2.51E-01 | 3,026,367 |
| 2.27E-09 | 28   | 3.42E-02 | 2,982,781 |
| 2.27E-09 | 0    | 9.75E-01 | 3,035,788 |
| 2.27E-09 | 24.9 | 3.61E-02 | 3,024,046 |
| 2.29E-09 | 0    | 5.32E-01 | 2,988,874 |
| 2.29E-09 | 26.8 | 2.36E-02 | 3,036,612 |
| 2.29E-09 | 13.5 | 1.77E-01 | 3,036,955 |
| 2.30E-09 | 6    | 3.37E-01 | 3,034,989 |
| 2.30E-09 | 14.8 | 1.52E-01 | 3,037,499 |
| 2.31E-09 | 0    | 8.60E-01 | 3,034,522 |
| 2.32E-09 | 0    | 5.06E-01 | 3,017,065 |
| 2.33E-09 | 9.1  | 2.66E-01 | 3,000,868 |
| 2.33E-09 | 0    | 5.15E-01 | 3,023,247 |
| 2.34E-09 | 0    | 5.01E-01 | 3,037,499 |
| 2.35E-09 | 16.3 | 1.28E-01 | 3,037,499 |
| 2.35E-09 | 6.3  | 3.31E-01 | 3,020,832 |
| 2.36E-09 | 0    | 5.07E-01 | 2,993,880 |
| 2.36E-09 | 0    | 9.00E-01 | 3,035,786 |
| 2.36E-09 | 0    | 8.52E-01 | 3,035,679 |
| 2.38E-09 | 0    | 6.65E-01 | 3,024,960 |
| 2.42E-09 | 7.3  | 3.07E-01 | 3,035,679 |
| 2.43E-09 | 33.3 | 4.61E-03 | 3,000,868 |
| 2.45E-09 | 9.8  | 2.51E-01 | 3,024,960 |
| 2.46E-09 | 22.3 | 5.31E-02 | 3,037,499 |
| 2.47E-09 | 0    | 4.94E-01 | 3,035,786 |
| 2.49E-09 | 13.3 | 1.80E-01 | 3,000,868 |
| 2.51E-09 | 0    | 9.76E-01 | 3,036,702 |
| 2.51E-09 | 2.5  | 4.18E-01 | 3,019,170 |
| 2.54E-09 | 22.9 | 4.93E-02 | 3,035,679 |

|          |      |          |           |
|----------|------|----------|-----------|
| 2.55E-09 | 0    | 8.24E-01 | 3,034,671 |
| 2.55E-09 | 1.2  | 4.48E-01 | 3,037,499 |
| 2.56E-09 | 0    | 7.65E-01 | 3,028,937 |
| 2.56E-09 | 13.2 | 1.82E-01 | 3,036,955 |
| 2.57E-09 | 12.8 | 1.89E-01 | 3,037,499 |
| 2.57E-09 | 13.6 | 2.00E-01 | 2,957,734 |
| 2.58E-09 | 0    | 8.45E-01 | 3,035,679 |
| 2.59E-09 | 0    | 7.24E-01 | 3,037,499 |
| 2.60E-09 | 0    | 8.39E-01 | 3,037,499 |
| 2.62E-09 | 0    | 4.82E-01 | 3,019,978 |
| 2.63E-09 | 0    | 7.93E-01 | 2,863,515 |
| 2.67E-09 | 0    | 6.83E-01 | 3,033,294 |
| 2.69E-09 | 19.5 | 8.61E-02 | 2,999,155 |
| 2.69E-09 | 0    | 7.24E-01 | 3,004,796 |
| 2.71E-09 | 0    | 5.18E-01 | 3,023,159 |
| 2.72E-09 | 11.7 | 2.12E-01 | 3,036,702 |
| 2.72E-09 | 0    | 6.33E-01 | 3,018,273 |
| 2.72E-09 | 0    | 5.27E-01 | 2,960,707 |
| 2.73E-09 | 25.6 | 2.97E-02 | 3,024,960 |
| 2.75E-09 | 8.3  | 2.84E-01 | 3,036,702 |
| 2.75E-09 | 0.3  | 4.70E-01 | 3,035,786 |
| 2.75E-09 | 0    | 6.65E-01 | 3,037,499 |
| 2.75E-09 | 29.8 | 1.14E-02 | 3,037,499 |
| 2.76E-09 | 0    | 6.25E-01 | 3,035,786 |
| 2.76E-09 | 8.3  | 2.84E-01 | 3,036,702 |
| 2.80E-09 | 0    | 6.93E-01 | 3,037,499 |
| 2.84E-09 | 21.9 | 5.69E-02 | 3,037,499 |
| 2.86E-09 | 0    | 6.28E-01 | 3,035,786 |
| 2.87E-09 | 24.9 | 5.82E-02 | 2,998,558 |
| 2.87E-09 | 0    | 8.89E-01 | 3,021,908 |
| 2.90E-09 | 0    | 6.54E-01 | 3,035,786 |
| 2.91E-09 | 22.5 | 5.36E-02 | 3,023,247 |
| 2.92E-09 | 0    | 7.45E-01 | 3,034,269 |
| 2.93E-09 | 0    | 5.81E-01 | 2,126,682 |
| 2.97E-09 | 0    | 7.00E-01 | 3,037,499 |
| 2.97E-09 | 0    | 6.61E-01 | 3,010,434 |
| 2.97E-09 | 13.6 | 3.04E-01 | 2,838,052 |
| 3.00E-09 | 0    | 7.69E-01 | 3,032,145 |
| 3.01E-09 | 17.9 | 1.05E-01 | 3,035,786 |
| 3.01E-09 | 18.7 | 9.46E-02 | 3,036,702 |
| 3.02E-09 | 2.6  | 4.16E-01 | 3,037,499 |
| 3.04E-09 | 0    | 7.44E-01 | 3,037,499 |
| 3.06E-09 | 32.3 | 4.46E-02 | 2,884,069 |
| 3.08E-09 | 0    | 7.09E-01 | 3,035,786 |
| 3.09E-09 | 18   | 1.04E-01 | 3,036,702 |
| 3.10E-09 | 14.5 | 1.56E-01 | 3,037,499 |
| 3.10E-09 | 0    | 6.02E-01 | 2,990,378 |
| 3.10E-09 | 59.6 | 2.14E-02 | 2,787,857 |

|          |      |          |           |
|----------|------|----------|-----------|
| 3.11E-09 | 0    | 5.57E-01 | 3,024,960 |
| 3.11E-09 | 0    | 6.68E-01 | 2,976,354 |
| 3.11E-09 | 0    | 4.86E-01 | 3,035,894 |
| 3.13E-09 | 0    | 6.38E-01 | 3,037,499 |
| 3.14E-09 | 0    | 8.24E-01 | 2,938,616 |
| 3.15E-09 | 0    | 6.39E-01 | 3,022,527 |
| 3.17E-09 | 0    | 5.73E-01 | 3,036,702 |
| 3.17E-09 | 0    | 9.79E-01 | 2,998,358 |
| 3.18E-09 | 31.8 | 1.44E-02 | 2,985,021 |
| 3.18E-09 | 0    | 5.73E-01 | 3,021,552 |
| 3.22E-09 | 0    | 7.95E-01 | 3,037,499 |
| 3.23E-09 | 0.7  | 4.60E-01 | 3,036,585 |
| 3.23E-09 | 0    | 7.07E-01 | 3,037,499 |
| 3.26E-09 | 20.3 | 7.61E-02 | 2,999,155 |
| 3.26E-09 | 14.9 | 1.57E-01 | 3,012,287 |
| 3.28E-09 | 0.6  | 4.63E-01 | 3,035,786 |
| 3.28E-09 | 4.8  | 3.65E-01 | 3,035,553 |
| 3.28E-09 | 21.3 | 6.45E-02 | 3,036,702 |
| 3.30E-09 | 0    | 7.44E-01 | 3,035,242 |
| 3.31E-09 | 1.9  | 4.33E-01 | 3,037,499 |
| 3.31E-09 | 0    | 5.76E-01 | 3,037,499 |
| 3.32E-09 | 0    | 6.92E-01 | 3,035,786 |
| 3.33E-09 | 10.3 | 2.42E-01 | 3,022,450 |
| 3.33E-09 | 0.4  | 4.68E-01 | 3,014,503 |
| 3.34E-09 | 7.5  | 3.02E-01 | 3,035,242 |
| 3.34E-09 | 11   | 2.25E-01 | 3,035,671 |
| 3.36E-09 | 0    | 1.00E+00 | 2,272,216 |
| 3.36E-09 | 0    | 7.11E-01 | 3,035,786 |
| 3.37E-09 | 14.5 | 1.61E-01 | 3,034,989 |
| 3.38E-09 | 6.5  | 3.25E-01 | 3,036,702 |
| 3.40E-09 | 0    | 8.13E-01 | 3,000,868 |
| 3.40E-09 | 18   | 2.03E-01 | 2,924,835 |
| 3.40E-09 | 2.1  | 4.28E-01 | 3,033,043 |
| 3.43E-09 | 31.5 | 7.93E-02 | 2,866,117 |
| 3.45E-09 | 0    | 9.00E-01 | 3,033,840 |
| 3.46E-09 | 18.5 | 9.65E-02 | 3,035,066 |
| 3.46E-09 | 34.8 | 3.05E-03 | 3,034,989 |
| 3.47E-09 | 19.6 | 8.28E-02 | 3,035,786 |
| 3.48E-09 | 26.5 | 2.51E-02 | 3,036,702 |
| 3.49E-09 | 6.9  | 3.15E-01 | 3,037,129 |
| 3.50E-09 | 5.6  | 3.46E-01 | 3,036,702 |
| 3.50E-09 | 0    | 8.73E-01 | 3,034,989 |
| 3.53E-09 | 0    | 6.20E-01 | 3,032,832 |
| 3.53E-09 | 21.2 | 6.56E-02 | 3,036,955 |
| 3.53E-09 | 0    | 5.80E-01 | 3,034,230 |
| 3.54E-09 | 0    | 8.66E-01 | 3,036,702 |
| 3.55E-09 | 0    | 5.64E-01 | 2,994,751 |
| 3.55E-09 | 0    | 8.61E-01 | 2,883,483 |



|          |      |          |           |
|----------|------|----------|-----------|
| 3.56E-09 | 25.4 | 3.11E-02 | 3,036,702 |
| 3.56E-09 | 13.8 | 1.74E-01 | 3,033,043 |
| 3.57E-09 | 0    | 6.02E-01 | 3,037,499 |
| 3.57E-09 | 12.3 | 2.67E-01 | 2,939,938 |
| 3.58E-09 | 0    | 8.41E-01 | 3,030,744 |
| 3.59E-09 | 4.4  | 3.73E-01 | 3,035,786 |
| 3.60E-09 | 11.3 | 2.19E-01 | 3,037,499 |
| 3.60E-09 | 0    | 7.54E-01 | 3,036,955 |
| 3.60E-09 | 1.3  | 4.48E-01 | 3,037,499 |
| 3.62E-09 | 0    | 8.76E-01 | 2,941,106 |
| 3.62E-09 | 0    | 4.92E-01 | 3,022,527 |
| 3.62E-09 | 21.8 | 6.17E-02 | 3,015,126 |
| 3.63E-09 | 19.7 | 8.18E-02 | 3,036,955 |
| 3.63E-09 | 97.4 | 5.98E-10 | 2,713,337 |
| 3.64E-09 | 0    | 6.20E-01 | 3,013,448 |
| 3.64E-09 | 0    | 6.12E-01 | 3,005,323 |
| 3.65E-09 | 10.3 | 2.41E-01 | 3,033,353 |
| 3.68E-09 | 20.4 | 7.69E-02 | 3,019,978 |
| 3.69E-09 | 0    | 9.03E-01 | 2,874,102 |
| 3.70E-09 | 9.2  | 2.62E-01 | 3,037,499 |
| 3.72E-09 | 21.2 | 6.82E-02 | 3,032,556 |
| 3.76E-09 | 0    | 9.44E-01 | 3,036,955 |
| 3.76E-09 | 8.7  | 2.79E-01 | 3,033,294 |
| 3.76E-09 | 19.6 | 8.31E-02 | 3,035,786 |
| 3.80E-09 | 1.1  | 4.51E-01 | 1,452,619 |
| 3.82E-09 | 0    | 9.04E-01 | 3,034,091 |
| 3.84E-09 | 0    | 9.47E-01 | 3,023,014 |
| 3.87E-09 | 7.9  | 2.98E-01 | 3,015,850 |
| 3.90E-09 | 0    | 9.64E-01 | 3,036,702 |
| 3.92E-09 | 9.7  | 2.52E-01 | 3,037,499 |
| 3.92E-09 | 4.4  | 3.73E-01 | 3,037,499 |
| 3.92E-09 | 2.8  | 4.11E-01 | 3,036,702 |
| 3.92E-09 | 0    | 6.32E-01 | 2,863,990 |
| 3.96E-09 | 0    | 6.90E-01 | 3,032,751 |
| 3.96E-09 | 20   | 9.08E-02 | 3,001,993 |
| 3.99E-09 | 0    | 6.27E-01 | 2,934,584 |
| 4.01E-09 | 0    | 6.70E-01 | 3,034,989 |
| 4.02E-09 | 0    | 7.15E-01 | 3,000,868 |
| 4.04E-09 | 0    | 9.51E-01 | 2,972,716 |
| 4.10E-09 | 0    | 6.44E-01 | 3,037,499 |
| 4.10E-09 | 1.9  | 4.37E-01 | 2,938,589 |
| 4.10E-09 | 0    | 9.60E-01 | 3,037,499 |
| 4.11E-09 | 19.8 | 9.27E-02 | 2,978,192 |
| 4.13E-09 | 15.9 | 1.36E-01 | 3,035,786 |
| 4.13E-09 | 14.4 | 1.62E-01 | 3,034,989 |
| 4.13E-09 | 14.4 | 1.61E-01 | 3,034,989 |
| 4.17E-09 | 22.1 | 5.73E-02 | 3,034,989 |
| 4.23E-09 | 0    | 6.63E-01 | 3,036,702 |

|          |      |          |           |
|----------|------|----------|-----------|
| 4.24E-09 | 25.8 | 2.90E-02 | 3,036,702 |
| 4.25E-09 | 0    | 7.96E-01 | 3,035,786 |
| 4.28E-09 | 0    | 7.73E-01 | 3,024,538 |
| 4.28E-09 | 26.6 | 2.46E-02 | 3,000,868 |
| 4.29E-09 | 0    | 6.66E-01 | 3,032,556 |
| 4.29E-09 | 1.9  | 4.35E-01 | 2,982,015 |
| 4.30E-09 | 0    | 7.77E-01 | 3,037,499 |
| 4.30E-09 | 0.8  | 4.59E-01 | 3,020,017 |
| 4.31E-09 | 0    | 6.85E-01 | 3,015,311 |
| 4.33E-09 | 14.7 | 1.56E-01 | 3,036,702 |
| 4.33E-09 | 17.1 | 1.18E-01 | 2,999,155 |
| 4.33E-09 | 0    | 9.03E-01 | 3,037,499 |
| 4.39E-09 | 0    | 8.35E-01 | 3,035,066 |
| 4.40E-09 | 0    | 4.76E-01 | 3,010,406 |
| 4.41E-09 | 13.8 | 1.80E-01 | 3,014,231 |
| 4.42E-09 | 18.3 | 2.15E-01 | 2,770,411 |
| 4.43E-09 | 16.9 | 1.33E-01 | 3,014,197 |
| 4.47E-09 | 10.4 | 2.37E-01 | 3,037,499 |
| 4.47E-09 | 10.9 | 2.28E-01 | 3,036,702 |
| 4.50E-09 | 24.7 | 3.93E-02 | 3,028,459 |
| 4.51E-09 | 13.1 | 1.82E-01 | 3,037,499 |
| 4.55E-09 | 0    | 6.98E-01 | 3,024,960 |
| 4.57E-09 | 0    | 8.69E-01 | 2,937,452 |
| 4.57E-09 | 0    | 6.47E-01 | 3,027,475 |
| 4.65E-09 | 0    | 5.72E-01 | 3,037,499 |
| 4.65E-09 | 0    | 6.25E-01 | 3,035,786 |
| 4.66E-09 | 3    | 4.10E-01 | 3,009,200 |
| 4.66E-09 | 0    | 7.56E-01 | 2,594,665 |
| 4.67E-09 | 0    | 5.25E-01 | 3,035,786 |
| 4.68E-09 | 16.6 | 1.23E-01 | 3,037,499 |
| 4.68E-09 | 37   | 1.55E-03 | 3,033,043 |
| 4.68E-09 | 0    | 7.79E-01 | 3,031,183 |
| 4.70E-09 | 0    | 8.39E-01 | 3,036,702 |
| 4.71E-09 | 0    | 9.55E-01 | 2,965,130 |
| 4.74E-09 | 9.2  | 2.79E-01 | 3,024,427 |
| 4.76E-09 | 0    | 8.48E-01 | 3,014,871 |
| 4.78E-09 | 12.4 | 2.02E-01 | 3,027,923 |
| 4.79E-09 | 37.2 | 7.91E-02 | 2,869,656 |
| 4.79E-09 | 11.5 | 2.33E-01 | 2,990,201 |
| 4.80E-09 | 12.5 | 1.96E-01 | 3,035,786 |
| 4.80E-09 | 13.4 | 1.78E-01 | 3,037,499 |
| 4.81E-09 | 2.5  | 4.19E-01 | 3,034,989 |
| 4.82E-09 | 29   | 2.45E-02 | 2,990,707 |
| 4.82E-09 | 11.6 | 2.13E-01 | 3,035,786 |
| 4.83E-09 | 2.8  | 4.23E-01 | 2,838,551 |
| 4.84E-09 | 0    | 9.09E-01 | 3,036,702 |
| 4.86E-09 | 0    | 7.67E-01 | 3,037,499 |
| 4.86E-09 | 0    | 7.65E-01 | 3,034,989 |

|          |      |          |           |
|----------|------|----------|-----------|
| 4.86E-09 | 0    | 8.51E-01 | 3,032,517 |
| 4.87E-09 | 13.3 | 1.83E-01 | 2,998,358 |
| 4.87E-09 | 0    | 4.78E-01 | 3,036,702 |
| 4.87E-09 | 0    | 7.23E-01 | 3,024,960 |
| 4.89E-09 | 23.8 | 4.51E-02 | 2,992,022 |
| 4.92E-09 | 34.1 | 3.36E-03 | 3,037,499 |
| 4.93E-09 | 0    | 9.41E-01 | 3,032,556 |
| 4.93E-09 | 0    | 6.91E-01 | 2,925,750 |
| 4.97E-09 | 0    | 8.89E-01 | 3,035,553 |
| 4.97E-09 | 14.8 | 1.53E-01 | 3,024,960 |
| 4.98E-09 | 0    | 5.78E-01 | 3,034,989 |
| 4.98E-09 | 25.1 | 7.20E-02 | 2,921,064 |
| 5.00E-09 | 0    | 6.93E-01 | 3,037,499 |
| 5.06E-09 | 24.3 | 4.74E-02 | 3,000,580 |
| 5.07E-09 | 2.4  | 4.22E-01 | 3,037,499 |
| 5.07E-09 | 10.6 | 2.39E-01 | 3,034,075 |
| 5.07E-09 | 12.5 | 1.93E-01 | 3,037,499 |
| 5.08E-09 | 4.9  | 3.62E-01 | 3,024,960 |
| 5.08E-09 | 0    | 9.66E-01 | 3,036,955 |
| 5.09E-09 | 14.8 | 1.54E-01 | 3,035,066 |
| 5.13E-09 | 26.5 | 2.59E-02 | 2,988,329 |
| 5.16E-09 | 0    | 5.79E-01 | 3,010,220 |
| 5.17E-09 | 12.1 | 2.02E-01 | 3,037,499 |
| 5.24E-09 | 0    | 9.67E-01 | 3,013,489 |
| 5.25E-09 | 26.6 | 1.33E-01 | 2,863,253 |
| 5.27E-09 | 1.3  | 4.47E-01 | 2,961,990 |
| 5.29E-09 | 25.5 | 3.07E-02 | 3,036,702 |
| 5.30E-09 | 0    | 6.34E-01 | 2,835,923 |
| 5.32E-09 | 10.4 | 2.38E-01 | 3,036,702 |
| 5.32E-09 | 49.5 | 5.39E-02 | 2,765,456 |
| 5.34E-09 | 7.4  | 3.05E-01 | 3,034,989 |
| 5.34E-09 | 13.6 | 1.77E-01 | 3,033,353 |
| 5.36E-09 | 10.8 | 2.35E-01 | 3,032,468 |
| 5.39E-09 | 6.4  | 3.26E-01 | 3,037,499 |
| 5.39E-09 | 0    | 6.60E-01 | 3,033,746 |
| 5.42E-09 | 0    | 9.38E-01 | 3,030,807 |
| 5.43E-09 | 3.2  | 4.10E-01 | 2,970,130 |
| 5.44E-09 | 27.9 | 2.61E-02 | 3,011,374 |
| 5.45E-09 | 0    | 5.70E-01 | 3,035,645 |
| 5.47E-09 | 0    | 4.97E-01 | 3,036,955 |
| 5.48E-09 | 25.5 | 4.12E-02 | 2,948,942 |
| 5.48E-09 | 0    | 8.64E-01 | 3,035,786 |
| 5.49E-09 | 0    | 7.16E-01 | 3,035,786 |
| 5.49E-09 | 0    | 4.80E-01 | 3,012,269 |
| 5.50E-09 | 0    | 8.73E-01 | 3,036,702 |
| 5.52E-09 | 19.7 | 8.01E-02 | 3,037,499 |
| 5.52E-09 | 44.8 | 1.86E-02 | 2,364,179 |
| 5.52E-09 | 0    | 8.69E-01 | 3,035,786 |

|          |      |          |           |
|----------|------|----------|-----------|
| 5.52E-09 | 20.4 | 9.08E-02 | 3,002,593 |
| 5.57E-09 | 0    | 7.41E-01 | 3,035,786 |
| 5.60E-09 | 0    | 5.51E-01 | 3,002,321 |
| 5.60E-09 | 0    | 9.84E-01 | 3,003,561 |
| 5.62E-09 | 15.6 | 1.47E-01 | 2,989,675 |
| 5.63E-09 | 9.7  | 2.52E-01 | 3,036,955 |
| 5.63E-09 | 7.7  | 2.99E-01 | 3,033,433 |
| 5.65E-09 | 0    | 6.19E-01 | 3,037,499 |
| 5.65E-09 | 13.5 | 1.87E-01 | 3,025,513 |
| 5.68E-09 | 16.6 | 1.25E-01 | 3,035,786 |
| 5.71E-09 | 0    | 5.42E-01 | 2,967,208 |
| 5.72E-09 | 0    | 1.00E+00 | 2,272,216 |
| 5.73E-09 | 5.1  | 3.57E-01 | 3,037,181 |
| 5.73E-09 | 25.3 | 5.81E-02 | 2,976,588 |
| 5.73E-09 | 7    | 3.36E-01 | 2,975,226 |
| 5.75E-09 | 8.7  | 2.73E-01 | 3,037,499 |
| 5.75E-09 | 26.9 | 2.35E-02 | 3,034,989 |
| 5.80E-09 | 0    | 4.88E-01 | 2,713,337 |
| 5.80E-09 | 15   | 1.51E-01 | 3,036,702 |
| 5.82E-09 | 0    | 6.93E-01 | 3,036,955 |
| 5.83E-09 | 0    | 7.25E-01 | 3,036,158 |
| 5.84E-09 | 18.9 | 9.31E-02 | 3,000,324 |
| 5.85E-09 | 0    | 9.73E-01 | 3,019,978 |
| 5.89E-09 | 6.6  | 3.23E-01 | 3,036,702 |
| 5.90E-09 | 4.7  | 3.65E-01 | 3,037,499 |
| 5.94E-09 | 0    | 7.88E-01 | 3,037,499 |
| 5.96E-09 | 14.9 | 1.50E-01 | 3,037,499 |
| 6.01E-09 | 27.8 | 3.00E-02 | 3,001,163 |
| 6.04E-09 | 19.4 | 8.49E-02 | 3,036,702 |
| 6.08E-09 | 12.9 | 1.91E-01 | 3,021,983 |
| 6.08E-09 | 16.1 | 1.32E-01 | 3,036,955 |
| 6.10E-09 | 0    | 7.08E-01 | 2,999,535 |
| 6.12E-09 | 0    | 1.00E+00 | 2,272,216 |
| 6.15E-09 | 0    | 5.68E-01 | 3,036,702 |
| 6.16E-09 | 17.3 | 1.13E-01 | 3,037,499 |
| 6.18E-09 | 0    | 6.99E-01 | 2,985,467 |
| 6.19E-09 | 19   | 9.07E-02 | 2,596,378 |
| 6.20E-09 | 0    | 6.38E-01 | 2,355,262 |
| 6.20E-09 | 7    | 3.21E-01 | 3,007,884 |
| 6.24E-09 | 11.5 | 2.16E-01 | 3,036,702 |
| 6.27E-09 | 0    | 5.40E-01 | 3,036,702 |
| 6.28E-09 | 13.9 | 2.16E-01 | 2,960,928 |
| 6.28E-09 | 19.6 | 8.24E-02 | 3,036,702 |
| 6.30E-09 | 0    | 4.89E-01 | 2,713,337 |
| 6.31E-09 | 15.9 | 1.39E-01 | 3,030,084 |
| 6.33E-09 | 3.1  | 4.11E-01 | 2,998,402 |
| 6.36E-09 | 0    | 5.18E-01 | 3,037,499 |
| 6.36E-09 | 2.9  | 4.08E-01 | 3,034,230 |

|          |      |          |           |
|----------|------|----------|-----------|
| 6.36E-09 | 0    | 6.37E-01 | 3,036,702 |
| 6.36E-09 | 9.2  | 2.66E-01 | 3,034,102 |
| 6.39E-09 | 6.4  | 3.25E-01 | 3,037,499 |
| 6.42E-09 | 8.8  | 2.72E-01 | 3,036,702 |
| 6.47E-09 | 29.9 | 1.10E-02 | 3,037,499 |
| 6.48E-09 | 2.3  | 4.23E-01 | 3,037,499 |
| 6.55E-09 | 6.6  | 3.23E-01 | 3,036,702 |
| 6.56E-09 | 9.3  | 2.85E-01 | 2,257,342 |
| 6.57E-09 | 0    | 7.22E-01 | 3,030,610 |
| 6.61E-09 | 0    | 5.57E-01 | 3,036,702 |
| 6.62E-09 | 0    | 5.41E-01 | 3,037,499 |
| 6.64E-09 | 8.4  | 2.83E-01 | 3,020,814 |
| 6.64E-09 | 5    | 3.59E-01 | 3,036,702 |
| 6.65E-09 | 3.3  | 4.01E-01 | 3,031,642 |
| 6.68E-09 | 0    | 6.54E-01 | 3,037,129 |
| 6.69E-09 | 6.9  | 3.15E-01 | 3,037,499 |
| 6.72E-09 | 4.2  | 3.83E-01 | 3,007,322 |
| 6.72E-09 | 0    | 7.53E-01 | 2,988,329 |
| 6.74E-09 | 22.2 | 5.41E-02 | 3,037,499 |
| 6.74E-09 | 0    | 7.15E-01 | 3,037,499 |
| 6.75E-09 | 0    | 9.45E-01 | 3,024,960 |
| 6.76E-09 | 0    | 4.95E-01 | 3,009,079 |
| 6.85E-09 | 9.9  | 2.48E-01 | 3,024,960 |
| 6.86E-09 | 0    | 7.63E-01 | 3,016,760 |
| 6.86E-09 | 13   | 1.91E-01 | 3,033,355 |
| 6.88E-09 | 14.7 | 1.55E-01 | 3,024,960 |
| 6.92E-09 | 43.8 | 1.93E-03 | 2,973,431 |
| 6.94E-09 | 17.8 | 1.05E-01 | 3,037,499 |
| 6.98E-09 | 0    | 8.35E-01 | 3,034,756 |
| 6.99E-09 | 0    | 6.32E-01 | 2,983,840 |
| 6.99E-09 | 19.9 | 8.49E-02 | 3,033,177 |
| 7.00E-09 | 0    | 7.19E-01 | 3,037,499 |
| 7.01E-09 | 21.4 | 6.19E-02 | 3,037,499 |
| 7.04E-09 | 13   | 1.86E-01 | 3,035,066 |
| 7.05E-09 | 0    | 8.10E-01 | 2,983,831 |
| 7.06E-09 | 0    | 9.86E-01 | 2,970,087 |
| 7.06E-09 | 11.7 | 2.10E-01 | 3,037,499 |
| 7.06E-09 | 0    | 7.42E-01 | 3,037,499 |
| 7.08E-09 | 11.5 | 2.16E-01 | 3,036,702 |
| 7.09E-09 | 0    | 7.31E-01 | 3,035,786 |
| 7.12E-09 | 4.5  | 3.75E-01 | 3,004,586 |
| 7.16E-09 | 0    | 9.12E-01 | 3,037,499 |
| 7.18E-09 | 0    | 6.40E-01 | 3,017,500 |
| 7.18E-09 | 0    | 8.23E-01 | 3,035,786 |
| 7.19E-09 | 0    | 8.72E-01 | 3,022,371 |
| 7.20E-09 | 21.5 | 6.33E-02 | 3,034,989 |
| 7.21E-09 | 0    | 9.89E-01 | 2,903,025 |
| 7.28E-09 | 5.4  | 3.51E-01 | 3,000,035 |

|          |      |          |           |
|----------|------|----------|-----------|
| 7.31E-09 | 0    | 6.13E-01 | 3,031,809 |
| 7.35E-09 | 0    | 5.38E-01 | 3,035,066 |
| 7.36E-09 | 0    | 7.34E-01 | 3,037,499 |
| 7.36E-09 | 10.4 | 3.30E-01 | 2,852,390 |
| 7.40E-09 | 9.7  | 2.53E-01 | 3,031,883 |
| 7.46E-09 | 6.9  | 3.16E-01 | 3,035,786 |
| 7.46E-09 | 0    | 7.81E-01 | 3,033,294 |
| 7.47E-09 | 23.9 | 1.43E-01 | 2,887,035 |
| 7.49E-09 | 0    | 5.96E-01 | 3,036,955 |
| 7.49E-09 | 0    | 5.23E-01 | 3,037,499 |
| 7.51E-09 | 0    | 6.18E-01 | 2,967,746 |
| 7.52E-09 | 20.6 | 7.00E-02 | 3,037,499 |
| 7.55E-09 | 13.6 | 1.90E-01 | 3,002,733 |
| 7.57E-09 | 30.4 | 9.80E-03 | 3,037,499 |
| 7.60E-09 | 6.9  | 3.15E-01 | 3,037,499 |
| 7.61E-09 | 0    | 6.66E-01 | 3,034,756 |
| 7.66E-09 | 0    | 7.00E-01 | 3,037,499 |
| 7.66E-09 | 0    | 8.67E-01 | 3,023,247 |
| 7.68E-09 | 0    | 6.28E-01 | 3,033,497 |
| 7.69E-09 | 0    | 5.85E-01 | 3,013,873 |
| 7.70E-09 | 11.2 | 2.22E-01 | 3,000,071 |
| 7.75E-09 | 0    | 5.42E-01 | 3,035,066 |
| 7.75E-09 | 0    | 8.06E-01 | 3,023,247 |
| 7.78E-09 | 21   | 6.58E-02 | 3,037,499 |
| 7.80E-09 | 0    | 9.11E-01 | 3,036,702 |
| 7.85E-09 | 0    | 9.47E-01 | 2,974,829 |
| 7.85E-09 | 18.5 | 9.67E-02 | 3,036,702 |
| 7.86E-09 | 4.1  | 3.81E-01 | 3,037,499 |
| 7.86E-09 | 12.5 | 1.94E-01 | 3,037,499 |
| 7.89E-09 | 0    | 6.25E-01 | 3,035,786 |
| 7.89E-09 | 0    | 7.69E-01 | 3,037,499 |
| 7.90E-09 | 9.1  | 2.69E-01 | 3,034,181 |
| 7.94E-09 | 16.9 | 1.23E-01 | 3,019,330 |
| 8.01E-09 | 4.6  | 3.70E-01 | 3,032,556 |
| 8.05E-09 | 16.7 | 1.47E-01 | 3,000,474 |
| 8.06E-09 | 38.2 | 9.44E-02 | 2,776,936 |
| 8.07E-09 | 21.5 | 6.39E-02 | 3,023,247 |
| 8.09E-09 | 12.3 | 2.06E-01 | 3,019,213 |
| 8.10E-09 | 10.7 | 2.55E-01 | 2,994,913 |
| 8.12E-09 | 0    | 6.47E-01 | 3,033,161 |
| 8.17E-09 | 0    | 6.67E-01 | 3,037,499 |
| 8.18E-09 | 0    | 8.08E-01 | 3,037,499 |
| 8.24E-09 | 5.5  | 3.47E-01 | 3,037,499 |
| 8.27E-09 | 14.7 | 1.54E-01 | 3,037,499 |
| 8.28E-09 | 0    | 9.30E-01 | 3,033,316 |
| 8.28E-09 | 4.1  | 3.86E-01 | 3,015,617 |
| 8.33E-09 | 0    | 5.45E-01 | 3,035,786 |
| 8.34E-09 | 0    | 9.89E-01 | 3,032,284 |

|          |      |          |           |
|----------|------|----------|-----------|
| 8.34E-09 | 11.9 | 2.07E-01 | 3,036,955 |
| 8.38E-09 | 4.8  | 3.64E-01 | 3,035,786 |
| 8.41E-09 | 0    | 5.70E-01 | 3,037,499 |
| 8.45E-09 | 5.5  | 3.54E-01 | 3,028,475 |
| 8.48E-09 | 13.9 | 1.76E-01 | 3,029,170 |
| 8.50E-09 | 0    | 8.55E-01 | 3,036,702 |
| 8.50E-09 | 0    | 7.04E-01 | 3,035,868 |
| 8.50E-09 | 20.1 | 7.73E-02 | 3,035,786 |
| 8.50E-09 | 0    | 5.91E-01 | 3,033,353 |
| 8.57E-09 | 1.8  | 4.35E-01 | 3,037,499 |
| 8.60E-09 | 2.4  | 4.23E-01 | 3,031,658 |
| 8.61E-09 | 0    | 6.71E-01 | 3,035,786 |
| 8.68E-09 | 0    | 8.22E-01 | 3,016,748 |
| 8.70E-09 | 0    | 6.10E-01 | 2,978,758 |
| 8.75E-09 | 18.5 | 1.54E-01 | 2,462,873 |
| 8.76E-09 | 22.8 | 5.16E-02 | 3,033,353 |
| 8.78E-09 | 0    | 4.78E-01 | 3,036,702 |
| 8.84E-09 | 0    | 6.32E-01 | 3,037,499 |
| 8.89E-09 | 0    | 7.59E-01 | 3,037,499 |
| 8.89E-09 | 4.3  | 3.76E-01 | 3,037,499 |
| 8.96E-09 | 13.1 | 1.87E-01 | 3,033,043 |
| 8.96E-09 | 12.1 | 2.01E-01 | 3,037,499 |
| 8.98E-09 | 0    | 1.00E+00 | 2,272,216 |
| 8.98E-09 | 0    | 5.88E-01 | 3,034,765 |
| 9.01E-09 | 0    | 8.34E-01 | 3,037,499 |
| 9.04E-09 | 0    | 6.29E-01 | 3,010,708 |
| 9.06E-09 | 8.2  | 2.84E-01 | 3,037,499 |
| 9.10E-09 | 0    | 8.34E-01 | 3,024,960 |
| 9.10E-09 | 14   | 1.68E-01 | 3,037,129 |
| 9.12E-09 | 0    | 5.08E-01 | 3,002,377 |
| 9.14E-09 | 0.9  | 4.57E-01 | 3,035,066 |
| 9.18E-09 | 8    | 2.92E-01 | 3,022,527 |
| 9.21E-09 | 0    | 5.85E-01 | 3,037,499 |
| 9.24E-09 | 0    | 8.77E-01 | 3,037,499 |
| 9.27E-09 | 0    | 5.35E-01 | 2,970,476 |
| 9.32E-09 | 3.7  | 3.08E-01 | 2,713,337 |
| 9.42E-09 | 2    | 4.34E-01 | 2,949,731 |
| 9.43E-09 | 0    | 7.43E-01 | 3,034,989 |
| 9.47E-09 | 0    | 8.47E-01 | 3,000,868 |
| 9.48E-09 | 19   | 9.28E-02 | 3,031,119 |
| 9.52E-09 | 2.4  | 4.22E-01 | 3,036,702 |
| 9.56E-09 | 0    | 8.27E-01 | 3,037,499 |
| 9.57E-09 | 0    | 5.81E-01 | 3,035,786 |
| 9.57E-09 | 1.8  | 4.35E-01 | 3,036,068 |
| 9.58E-09 | 6.8  | 3.17E-01 | 3,037,499 |
| 9.58E-09 | 18.1 | 1.00E-01 | 3,037,499 |
| 9.61E-09 | 25.2 | 5.27E-02 | 2,994,795 |
| 9.65E-09 | 2.8  | 4.12E-01 | 3,036,702 |

|          |      |          |           |
|----------|------|----------|-----------|
| 9.66E-09 | 0    | 6.98E-01 | 3,037,499 |
| 9.67E-09 | 0    | 8.99E-01 | 2,977,971 |
| 9.70E-09 | 14.6 | 1.81E-01 | 2,524,895 |
| 9.72E-09 | 28.5 | 1.61E-02 | 3,036,955 |
| 9.72E-09 | 20.9 | 6.75E-02 | 3,037,499 |
| 9.72E-09 | 0    | 5.71E-01 | 2,969,322 |
| 9.73E-09 | 3    | 4.08E-01 | 3,036,332 |
| 9.79E-09 | 0    | 9.76E-01 | 3,037,499 |
| 9.80E-09 | 0.6  | 4.63E-01 | 3,019,119 |
| 9.85E-09 | 0    | 5.42E-01 | 3,036,158 |
| 9.86E-09 | 0    | 6.87E-01 | 3,036,955 |
| 9.88E-09 | 1.1  | 4.53E-01 | 3,037,499 |
| 9.90E-09 | 5.6  | 3.44E-01 | 3,036,702 |
| 9.90E-09 | 11.8 | 2.17E-01 | 3,027,592 |
| 9.98E-09 | 3.9  | 3.86E-01 | 3,037,499 |
| 9.98E-09 | 0    | 9.16E-01 | 3,035,786 |
| 1.00E-08 | 0    | 7.78E-01 | 3,037,499 |
| 1.00E-08 | 0    | 8.81E-01 | 3,034,989 |
| 1.01E-08 | 0    | 8.81E-01 | 3,012,232 |
| 1.01E-08 | 29.8 | 2.01E-02 | 2,998,990 |
| 1.01E-08 | 0    | 7.94E-01 | 3,037,499 |
| 1.02E-08 | 0    | 5.07E-01 | 3,037,499 |
| 1.02E-08 | 17.8 | 1.05E-01 | 3,037,499 |
| 1.02E-08 | 17.5 | 1.09E-01 | 3,037,499 |
| 1.02E-08 | 18.2 | 1.01E-01 | 3,036,702 |
| 1.02E-08 | 2.6  | 4.17E-01 | 3,007,741 |
| 1.03E-08 | 0    | 8.16E-01 | 3,014,685 |
| 1.03E-08 | 0    | 4.91E-01 | 3,029,450 |
| 1.03E-08 | 27.7 | 2.05E-02 | 3,020,814 |
| 1.03E-08 | 18   | 1.08E-01 | 3,032,439 |
| 1.04E-08 | 10.5 | 2.34E-01 | 3,037,499 |
| 1.04E-08 | 8.4  | 2.92E-01 | 2,995,310 |
| 1.04E-08 | 0    | 6.46E-01 | 3,037,499 |
| 1.04E-08 | 17.7 | 1.08E-01 | 3,035,786 |
| 1.04E-08 | 3    | 4.07E-01 | 3,034,269 |
| 1.05E-08 | 1.3  | 4.46E-01 | 3,036,702 |
| 1.05E-08 | 39.3 | 6.22E-04 | 3,034,989 |
| 1.06E-08 | 18.8 | 9.62E-02 | 3,035,565 |
| 1.06E-08 | 0    | 6.93E-01 | 3,028,638 |
| 1.07E-08 | 14.1 | 1.68E-01 | 3,022,450 |
| 1.07E-08 | 13.2 | 1.81E-01 | 3,037,499 |
| 1.09E-08 | 0    | 4.88E-01 | 3,037,499 |
| 1.09E-08 | 0    | 7.69E-01 | 3,020,814 |
| 1.10E-08 | 0    | 5.51E-01 | 3,034,989 |
| 1.10E-08 | 7.1  | 3.11E-01 | 3,037,499 |
| 1.11E-08 | 0    | 7.46E-01 | 3,034,989 |
| 1.11E-08 | 15.7 | 1.39E-01 | 3,034,989 |
| 1.12E-08 | 19.6 | 8.90E-02 | 3,033,520 |



|          |      |          |           |
|----------|------|----------|-----------|
| 1.12E-08 | 0    | 5.35E-01 | 3,036,702 |
| 1.12E-08 | 0.9  | 4.55E-01 | 3,034,989 |
| 1.12E-08 | 16.6 | 1.26E-01 | 3,035,361 |
| 1.12E-08 | 0    | 6.81E-01 | 3,017,563 |
| 1.12E-08 | 0.7  | 4.60E-01 | 3,035,786 |
| 1.13E-08 | 10.3 | 2.41E-01 | 3,036,158 |
| 1.13E-08 | 0    | 8.67E-01 | 3,036,702 |
| 1.13E-08 | 10.7 | 2.31E-01 | 3,037,499 |
| 1.14E-08 | 24.4 | 3.84E-02 | 3,023,247 |
| 1.14E-08 | 0    | 8.95E-01 | 2,963,179 |
| 1.14E-08 | 0    | 7.47E-01 | 3,037,499 |
| 1.14E-08 | 7.5  | 3.24E-01 | 2,971,047 |
| 1.14E-08 | 19.3 | 8.50E-02 | 3,037,499 |
| 1.15E-08 | 22.7 | 5.10E-02 | 3,035,880 |
| 1.16E-08 | 0    | 9.67E-01 | 2,838,817 |
| 1.16E-08 | 0    | 5.73E-01 | 3,035,066 |
| 1.16E-08 | 0    | 5.01E-01 | 3,036,955 |
| 1.16E-08 | 0    | 6.83E-01 | 3,024,960 |
| 1.16E-08 | 0    | 6.35E-01 | 3,037,499 |
| 1.16E-08 | 3.5  | 4.03E-01 | 2,978,623 |
| 1.16E-08 | 19   | 8.93E-02 | 3,037,499 |
| 1.17E-08 | 0    | 5.20E-01 | 3,036,702 |
| 1.18E-08 | 19.1 | 9.47E-02 | 3,028,156 |
| 1.18E-08 | 29.9 | 1.15E-02 | 3,036,702 |
| 1.18E-08 | 1.6  | 4.38E-01 | 2,874,927 |
| 1.19E-08 | 0    | 6.59E-01 | 3,010,443 |
| 1.19E-08 | 0    | 7.40E-01 | 2,988,997 |
| 1.19E-08 | 5.2  | 3.53E-01 | 3,037,499 |
| 1.19E-08 | 0    | 6.00E-01 | 3,035,786 |
| 1.19E-08 | 9.1  | 2.66E-01 | 3,036,702 |
| 1.20E-08 | 0    | 7.78E-01 | 3,024,960 |
| 1.21E-08 | 17.3 | 1.19E-01 | 3,021,552 |
| 1.21E-08 | 0    | 5.08E-01 | 3,018,113 |
| 1.22E-08 | 29.6 | 1.29E-02 | 3,034,989 |
| 1.22E-08 | 25.4 | 3.84E-02 | 3,015,265 |
| 1.23E-08 | 0    | 1.00E+00 | 2,272,216 |
| 1.23E-08 | 8.3  | 2.81E-01 | 3,037,499 |
| 1.23E-08 | 12.8 | 1.92E-01 | 3,033,433 |
| 1.23E-08 | 0    | 9.02E-01 | 3,012,771 |
| 1.24E-08 | 26.3 | 2.93E-02 | 3,030,573 |
| 1.26E-08 | 0    | 7.37E-01 | 3,037,499 |
| 1.26E-08 | 0    | 5.18E-01 | 3,034,091 |
| 1.26E-08 | 0    | 8.31E-01 | 2,837,640 |
| 1.26E-08 | 20.5 | 7.08E-02 | 3,037,499 |
| 1.26E-08 | 5    | 3.58E-01 | 3,037,499 |
| 1.26E-08 | 31.4 | 2.07E-02 | 2,980,008 |
| 1.26E-08 | 0    | 7.40E-01 | 2,986,842 |
| 1.28E-08 | 0    | 7.51E-01 | 3,037,499 |

|          |      |          |           |
|----------|------|----------|-----------|
| 1.28E-08 | 0.5  | 4.65E-01 | 3,005,914 |
| 1.28E-08 | 31.5 | 2.05E-02 | 2,970,944 |
| 1.28E-08 | 11.2 | 2.32E-01 | 3,005,460 |
| 1.28E-08 | 0    | 7.79E-01 | 3,024,163 |
| 1.29E-08 | 0    | 6.45E-01 | 2,935,260 |
| 1.29E-08 | 0    | 5.37E-01 | 3,037,499 |
| 1.30E-08 | 0    | 9.48E-01 | 2,947,342 |
| 1.30E-08 | 19.1 | 9.16E-02 | 3,024,046 |
| 1.30E-08 | 23.1 | 4.79E-02 | 3,035,786 |
| 1.30E-08 | 0    | 5.47E-01 | 3,037,499 |
| 1.30E-08 | 0    | 9.36E-01 | 3,037,499 |
| 1.31E-08 | 25.4 | 3.05E-02 | 3,037,499 |
| 1.31E-08 | 0    | 7.59E-01 | 3,037,499 |
| 1.32E-08 | 0    | 6.14E-01 | 3,035,679 |
| 1.32E-08 | 6.3  | 3.29E-01 | 3,037,499 |
| 1.32E-08 | 0    | 4.76E-01 | 3,036,702 |
| 1.33E-08 | 13.9 | 1.69E-01 | 3,035,553 |
| 1.33E-08 | 0    | 9.32E-01 | 3,037,499 |
| 1.33E-08 | 0    | 5.99E-01 | 3,037,499 |
| 1.33E-08 | 0    | 9.53E-01 | 2,995,945 |
| 1.34E-08 | 14.2 | 1.97E-01 | 2,991,672 |
| 1.34E-08 | 3.6  | 3.93E-01 | 3,034,445 |
| 1.34E-08 | 10.8 | 2.44E-01 | 3,002,310 |
| 1.35E-08 | 4.2  | 3.80E-01 | 2,997,581 |
| 1.35E-08 | 0    | 8.88E-01 | 3,037,499 |
| 1.35E-08 | 4.8  | 3.65E-01 | 3,036,702 |
| 1.36E-08 | 0    | 5.22E-01 | 2,596,378 |
| 1.37E-08 | 0    | 7.94E-01 | 3,029,854 |
| 1.37E-08 | 0    | 4.79E-01 | 3,030,571 |
| 1.37E-08 | 19.5 | 1.83E-01 | 2,918,512 |
| 1.37E-08 | 27.9 | 1.99E-02 | 3,032,809 |
| 1.37E-08 | 14.6 | 1.55E-01 | 3,037,499 |
| 1.37E-08 | 27.9 | 1.78E-02 | 3,037,499 |
| 1.38E-08 | 7.1  | 3.52E-01 | 2,915,755 |
| 1.38E-08 | 8.4  | 2.81E-01 | 3,036,702 |
| 1.38E-08 | 0    | 5.01E-01 | 3,013,761 |
| 1.39E-08 | 3    | 4.05E-01 | 3,036,702 |
| 1.40E-08 | 6.7  | 3.19E-01 | 3,024,960 |
| 1.41E-08 | 7.5  | 3.07E-01 | 3,033,737 |
| 1.41E-08 | 0    | 9.22E-01 | 3,000,868 |
| 1.41E-08 | 4.3  | 3.76E-01 | 3,018,949 |
| 1.41E-08 | 0    | 6.50E-01 | 3,030,999 |
| 1.42E-08 | 9.3  | 2.63E-01 | 3,035,009 |
| 1.42E-08 | 3.5  | 3.94E-01 | 3,037,499 |
| 1.42E-08 | 6.4  | 3.27E-01 | 3,034,989 |
| 1.42E-08 | 1.5  | 4.43E-01 | 2,955,466 |
| 1.42E-08 | 1.2  | 4.48E-01 | 3,037,499 |
| 1.42E-08 | 0    | 9.26E-01 | 3,037,499 |

|          |      |          |           |
|----------|------|----------|-----------|
| 1.44E-08 | 0    | 9.85E-01 | 2,996,959 |
| 1.44E-08 | 2.3  | 4.23E-01 | 3,036,702 |
| 1.44E-08 | 34.3 | 3.40E-03 | 3,036,702 |
| 1.44E-08 | 0    | 6.95E-01 | 2,976,647 |
| 1.45E-08 | 15.6 | 1.40E-01 | 3,024,960 |
| 1.45E-08 | 0    | 5.50E-01 | 3,000,071 |
| 1.46E-08 | 17.8 | 1.05E-01 | 3,037,499 |
| 1.46E-08 | 0    | 6.08E-01 | 3,036,955 |
| 1.46E-08 | 12.8 | 2.02E-01 | 3,031,011 |
| 1.46E-08 | 0    | 6.40E-01 | 2,969,030 |
| 1.47E-08 | 0    | 7.29E-01 | 3,015,850 |
| 1.47E-08 | 0    | 6.63E-01 | 3,013,437 |
| 1.47E-08 | 9.1  | 2.67E-01 | 3,035,786 |
| 1.47E-08 | 48.5 | 5.26E-06 | 3,034,899 |
| 1.47E-08 | 3.8  | 3.87E-01 | 3,024,960 |
| 1.47E-08 | 18.8 | 9.10E-02 | 3,037,499 |
| 1.48E-08 | 0    | 9.71E-01 | 3,031,291 |
| 1.48E-08 | 0    | 8.18E-01 | 2,713,337 |
| 1.49E-08 | 0    | 6.61E-01 | 3,037,499 |
| 1.51E-08 | 9.9  | 2.47E-01 | 3,037,499 |
| 1.51E-08 | 15   | 1.99E-01 | 2,981,782 |
| 1.51E-08 | 35   | 5.01E-03 | 3,007,426 |
| 1.51E-08 | 11.4 | 2.16E-01 | 3,037,499 |
| 1.55E-08 | 7.7  | 3.15E-01 | 2,950,668 |
| 1.55E-08 | 1.4  | 4.44E-01 | 3,037,499 |
| 1.56E-08 | 28.2 | 1.68E-02 | 3,037,499 |
| 1.56E-08 | 13.6 | 1.74E-01 | 3,037,499 |
| 1.56E-08 | 12.6 | 1.91E-01 | 3,037,499 |
| 1.57E-08 | 0    | 5.27E-01 | 3,028,743 |
| 1.57E-08 | 0    | 7.95E-01 | 3,008,838 |
| 1.57E-08 | 16.4 | 1.53E-01 | 2,985,334 |
| 1.57E-08 | 0    | 6.81E-01 | 3,036,702 |
| 1.57E-08 | 7.3  | 3.09E-01 | 2,578,137 |
| 1.57E-08 | 13.6 | 1.73E-01 | 3,037,499 |
| 1.57E-08 | 0    | 5.07E-01 | 3,035,786 |
| 1.58E-08 | 17.3 | 1.18E-01 | 2,983,038 |
| 1.58E-08 | 8.5  | 2.78E-01 | 3,037,499 |
| 1.58E-08 | 0    | 4.79E-01 | 3,020,514 |
| 1.58E-08 | 8.3  | 2.83E-01 | 3,037,499 |
| 1.58E-08 | 9.3  | 2.62E-01 | 3,035,786 |
| 1.58E-08 | 7.1  | 3.16E-01 | 2,992,394 |
| 1.59E-08 | 0    | 5.55E-01 | 3,036,955 |
| 1.59E-08 | 3.1  | 4.06E-01 | 3,005,701 |
| 1.59E-08 | 14.9 | 1.50E-01 | 3,037,499 |
| 1.59E-08 | 0    | 5.27E-01 | 3,037,499 |
| 1.59E-08 | 1.4  | 4.45E-01 | 3,036,158 |
| 1.59E-08 | 0    | 6.70E-01 | 3,037,499 |
| 1.59E-08 | 1.2  | 4.50E-01 | 3,036,702 |

|          |      |          |           |
|----------|------|----------|-----------|
| 1.60E-08 | 0    | 6.97E-01 | 3,036,702 |
| 1.61E-08 | 12   | 2.04E-01 | 3,037,499 |
| 1.62E-08 | 9.2  | 2.69E-01 | 3,028,283 |
| 1.63E-08 | 4.8  | 3.64E-01 | 3,037,499 |
| 1.64E-08 | 27.2 | 2.23E-02 | 3,034,899 |
| 1.64E-08 | 26.2 | 2.64E-02 | 3,035,786 |
| 1.65E-08 | 8.9  | 2.70E-01 | 3,000,868 |
| 1.65E-08 | 0    | 6.98E-01 | 2,935,991 |
| 1.65E-08 | 0    | 1.00E+00 | 2,272,216 |
| 1.65E-08 | 0    | 6.02E-01 | 3,037,499 |
| 1.66E-08 | 5.1  | 3.56E-01 | 3,037,499 |
| 1.66E-08 | 0    | 6.66E-01 | 3,020,814 |
| 1.66E-08 | 0.2  | 4.73E-01 | 3,036,702 |
| 1.66E-08 | 0    | 6.66E-01 | 2,887,121 |
| 1.66E-08 | 15.4 | 1.42E-01 | 3,036,552 |
| 1.67E-08 | 0    | 7.60E-01 | 3,035,066 |
| 1.67E-08 | 0    | 9.87E-01 | 2,999,155 |
| 1.68E-08 | 8.3  | 2.84E-01 | 3,024,960 |
| 1.68E-08 | 0    | 7.99E-01 | 3,031,603 |
| 1.69E-08 | 0    | 8.42E-01 | 2,510,553 |
| 1.69E-08 | 0    | 7.31E-01 | 3,000,990 |
| 1.69E-08 | 0    | 6.47E-01 | 3,006,446 |
| 1.70E-08 | 9.1  | 2.65E-01 | 3,035,066 |
| 1.70E-08 | 14   | 1.68E-01 | 3,036,158 |
| 1.70E-08 | 0    | 9.39E-01 | 3,000,868 |
| 1.70E-08 | 13.6 | 2.60E-01 | 2,882,813 |
| 1.70E-08 | 0    | 6.83E-01 | 3,024,659 |
| 1.70E-08 | 0    | 6.56E-01 | 3,037,499 |
| 1.70E-08 | 0    | 8.07E-01 | 3,000,868 |
| 1.71E-08 | 0    | 7.78E-01 | 3,035,786 |
| 1.71E-08 | 7.1  | 3.09E-01 | 3,035,786 |
| 1.71E-08 | 0    | 5.11E-01 | 3,037,499 |
| 1.72E-08 | 17.8 | 1.43E-01 | 2,949,807 |
| 1.72E-08 | 18.7 | 9.43E-02 | 3,036,702 |
| 1.72E-08 | 0.5  | 4.64E-01 | 2,990,519 |
| 1.72E-08 | 0    | 9.06E-01 | 3,036,702 |
| 1.73E-08 | 11.1 | 2.23E-01 | 3,037,499 |
| 1.73E-08 | 0    | 4.85E-01 | 3,028,362 |
| 1.73E-08 | 0    | 9.19E-01 | 3,023,247 |
| 1.73E-08 | 19.3 | 8.66E-02 | 3,036,702 |
| 1.73E-08 | 0    | 7.85E-01 | 3,012,715 |
| 1.74E-08 | 0    | 9.86E-01 | 3,036,267 |
| 1.74E-08 | 0    | 6.48E-01 | 3,033,353 |
| 1.74E-08 | 0    | 8.42E-01 | 3,005,623 |
| 1.74E-08 | 1.8  | 4.36E-01 | 3,037,499 |
| 1.74E-08 | 0    | 9.42E-01 | 3,036,702 |
| 1.75E-08 | 0    | 6.67E-01 | 3,019,181 |
| 1.75E-08 | 0.6  | 4.63E-01 | 3,037,499 |

|          |      |          |           |
|----------|------|----------|-----------|
| 1.75E-08 | 0    | 7.00E-01 | 3,015,628 |
| 1.76E-08 | 0    | 8.81E-01 | 3,033,260 |
| 1.76E-08 | 5.5  | 3.46E-01 | 3,037,499 |
| 1.77E-08 | 0    | 7.96E-01 | 2,970,633 |
| 1.77E-08 | 0    | 5.78E-01 | 3,024,163 |
| 1.77E-08 | 30.1 | 1.25E-02 | 3,021,552 |
| 1.77E-08 | 12.9 | 1.92E-01 | 2,986,616 |
| 1.77E-08 | 8.6  | 2.79E-01 | 3,033,316 |
| 1.77E-08 | 15.9 | 1.34E-01 | 3,037,499 |
| 1.78E-08 | 14.7 | 1.54E-01 | 3,037,499 |
| 1.78E-08 | 8.8  | 2.90E-01 | 2,987,724 |
| 1.79E-08 | 0    | 4.95E-01 | 3,020,814 |
| 1.79E-08 | 7.7  | 2.96E-01 | 3,036,702 |
| 1.79E-08 | 12.6 | 2.18E-01 | 2,950,929 |
| 1.79E-08 | 1.3  | 4.47E-01 | 3,008,612 |
| 1.80E-08 | 8    | 2.90E-01 | 3,036,702 |
| 1.82E-08 | 0    | 8.88E-01 | 3,035,804 |
| 1.82E-08 | 16.3 | 1.84E-01 | 2,985,449 |
| 1.83E-08 | 0.1  | 4.75E-01 | 3,036,955 |
| 1.84E-08 | 23.5 | 6.57E-02 | 3,016,915 |
| 1.84E-08 | 0.9  | 4.57E-01 | 3,030,025 |
| 1.84E-08 | 0    | 5.91E-01 | 3,035,786 |
| 1.85E-08 | 0    | 8.51E-01 | 3,037,499 |
| 1.86E-08 | 19.2 | 8.75E-02 | 3,035,671 |
| 1.86E-08 | 19.7 | 8.19E-02 | 3,035,786 |
| 1.86E-08 | 9.2  | 2.63E-01 | 3,037,499 |
| 1.87E-08 | 0    | 6.24E-01 | 3,015,053 |
| 1.87E-08 | 0    | 9.45E-01 | 3,034,696 |
| 1.87E-08 | 11.1 | 2.74E-01 | 2,938,655 |
| 1.89E-08 | 30.3 | 1.48E-02 | 3,012,717 |
| 1.90E-08 | 0    | 6.83E-01 | 3,023,140 |
| 1.91E-08 | 8.1  | 2.94E-01 | 3,020,638 |
| 1.92E-08 | 0    | 9.52E-01 | 3,035,786 |
| 1.92E-08 | 0    | 7.65E-01 | 3,036,702 |
| 1.93E-08 | 3.6  | 3.92E-01 | 3,036,585 |
| 1.93E-08 | 0    | 9.21E-01 | 3,034,989 |
| 1.93E-08 | 0    | 1.00E+00 | 2,272,216 |
| 1.93E-08 | 20.5 | 7.25E-02 | 3,024,960 |
| 1.94E-08 | 19   | 9.07E-02 | 3,035,786 |
| 1.94E-08 | 0.5  | 4.65E-01 | 3,027,224 |
| 1.95E-08 | 10   | 2.45E-01 | 3,037,499 |
| 1.96E-08 | 10.9 | 2.30E-01 | 3,030,156 |
| 1.96E-08 | 0    | 5.07E-01 | 3,020,035 |
| 1.97E-08 | 27.8 | 1.91E-02 | 3,035,553 |
| 1.97E-08 | 1.1  | 4.51E-01 | 3,034,075 |
| 1.97E-08 | 6.6  | 3.28E-01 | 3,012,734 |
| 1.98E-08 | 20.1 | 8.70E-02 | 2,999,940 |
| 1.99E-08 | 10.7 | 2.45E-01 | 3,022,210 |

|          |      |          |           |
|----------|------|----------|-----------|
| 1.99E-08 | 0    | 6.99E-01 | 2,976,261 |
| 1.99E-08 | 0    | 6.10E-01 | 3,006,375 |
| 1.99E-08 | 0    | 5.36E-01 | 3,034,989 |
| 2.01E-08 | 0    | 6.64E-01 | 2,964,640 |
| 2.01E-08 | 0    | 7.98E-01 | 3,036,702 |
| 2.02E-08 | 0    | 5.72E-01 | 3,034,091 |
| 2.02E-08 | 0    | 5.41E-01 | 3,016,215 |
| 2.02E-08 | 0    | 6.50E-01 | 3,004,362 |
| 2.03E-08 | 0    | 9.68E-01 | 3,028,362 |
| 2.03E-08 | 11.2 | 2.23E-01 | 3,022,450 |
| 2.04E-08 | 3.6  | 3.93E-01 | 3,034,989 |
| 2.04E-08 | 0    | 9.72E-01 | 2,864,459 |
| 2.06E-08 | 12.6 | 1.94E-01 | 3,035,786 |
| 2.06E-08 | 0    | 9.92E-01 | 3,037,499 |
| 2.06E-08 | 0    | 8.61E-01 | 3,037,499 |
| 2.07E-08 | 12.6 | 1.99E-01 | 3,022,069 |
| 2.07E-08 | 24.1 | 3.99E-02 | 3,036,702 |
| 2.07E-08 | 6.2  | 3.41E-01 | 3,004,906 |
| 2.07E-08 | 18.1 | 2.08E-01 | 2,865,313 |
| 2.08E-08 | 5.2  | 3.82E-01 | 2,933,775 |
| 2.08E-08 | 0    | 6.49E-01 | 3,000,868 |
| 2.08E-08 | 11.9 | 2.14E-01 | 3,028,313 |
| 2.09E-08 | 0    | 7.10E-01 | 2,955,256 |
| 2.11E-08 | 1.1  | 4.53E-01 | 3,037,499 |
| 2.11E-08 | 14   | 1.68E-01 | 3,036,702 |
| 2.12E-08 | 0    | 6.47E-01 | 2,998,435 |
| 2.12E-08 | 0    | 4.81E-01 | 3,037,499 |
| 2.13E-08 | 10.2 | 2.42E-01 | 3,036,702 |
| 2.13E-08 | 0    | 6.62E-01 | 3,036,702 |
| 2.13E-08 | 0    | 8.17E-01 | 3,034,989 |
| 2.14E-08 | 0    | 6.57E-01 | 3,035,786 |
| 2.14E-08 | 0    | 9.02E-01 | 3,033,316 |
| 2.15E-08 | 8.6  | 3.61E-01 | 2,715,255 |
| 2.15E-08 | 18.3 | 1.40E-01 | 2,992,881 |
| 2.15E-08 | 16.4 | 1.46E-01 | 3,003,572 |
| 2.16E-08 | 16.1 | 1.35E-01 | 3,022,450 |
| 2.17E-08 | 0    | 8.65E-01 | 2,748,471 |
| 2.17E-08 | 1.7  | 4.37E-01 | 3,037,499 |
| 2.17E-08 | 35   | 4.76E-02 | 2,854,740 |
| 2.17E-08 | 17.9 | 1.08E-01 | 3,032,556 |
| 2.18E-08 | 0    | 6.76E-01 | 3,030,433 |
| 2.19E-08 | 21.6 | 8.54E-02 | 2,992,559 |
| 2.19E-08 | 9.6  | 2.96E-01 | 2,987,662 |
| 2.20E-08 | 6.2  | 3.37E-01 | 3,028,150 |
| 2.21E-08 | 0    | 5.73E-01 | 3,035,786 |
| 2.21E-08 | 0    | 6.75E-01 | 3,031,425 |
| 2.21E-08 | 0    | 9.51E-01 | 3,037,499 |
| 2.21E-08 | 0    | 7.37E-01 | 3,006,171 |

|          |      |          |           |
|----------|------|----------|-----------|
| 2.22E-08 | 39.2 | 6.08E-04 | 3,035,679 |
| 2.22E-08 | 0.2  | 4.72E-01 | 3,035,242 |
| 2.23E-08 | 1.2  | 4.50E-01 | 3,034,091 |
| 2.25E-08 | 11.4 | 2.16E-01 | 3,037,499 |
| 2.25E-08 | 0    | 4.83E-01 | 3,024,960 |
| 2.25E-08 | 0    | 5.32E-01 | 3,037,499 |
| 2.26E-08 | 0    | 8.18E-01 | 3,037,499 |
| 2.26E-08 | 12.7 | 1.90E-01 | 3,037,499 |
| 2.27E-08 | 7.3  | 3.07E-01 | 3,036,702 |
| 2.27E-08 | 20.6 | 7.27E-02 | 3,023,247 |
| 2.28E-08 | 0    | 7.98E-01 | 2,839,803 |
| 2.28E-08 | 6.7  | 3.20E-01 | 3,037,499 |
| 2.30E-08 | 15.6 | 1.39E-01 | 3,000,868 |
| 2.30E-08 | 3.1  | 4.18E-01 | 2,918,865 |
| 2.31E-08 | 14.1 | 1.66E-01 | 3,036,702 |
| 2.31E-08 | 0    | 8.43E-01 | 2,852,296 |
| 2.33E-08 | 12.7 | 1.91E-01 | 3,036,702 |
| 2.33E-08 | 4.1  | 3.80E-01 | 3,037,499 |
| 2.35E-08 | 0    | 8.93E-01 | 3,035,786 |
| 2.35E-08 | 0    | 9.31E-01 | 3,035,066 |
| 2.36E-08 | 0    | 8.29E-01 | 3,036,955 |
| 2.36E-08 | 0    | 6.03E-01 | 3,037,499 |
| 2.37E-08 | 0    | 7.08E-01 | 3,034,989 |
| 2.39E-08 | 17.5 | 1.18E-01 | 3,027,839 |
| 2.39E-08 | 5.7  | 3.42E-01 | 3,037,499 |
| 2.40E-08 | 0    | 7.60E-01 | 3,009,996 |
| 2.41E-08 | 0    | 8.14E-01 | 2,797,257 |
| 2.41E-08 | 4.1  | 3.80E-01 | 3,036,702 |
| 2.42E-08 | 0    | 6.60E-01 | 2,846,016 |
| 2.42E-08 | 0    | 9.77E-01 | 2,973,669 |
| 2.43E-08 | 0    | 6.98E-01 | 3,023,978 |
| 2.44E-08 | 8.2  | 2.98E-01 | 3,017,948 |
| 2.44E-08 | 27.3 | 2.05E-02 | 3,037,499 |
| 2.44E-08 | 0    | 5.47E-01 | 3,020,526 |
| 2.45E-08 | 7.1  | 3.19E-01 | 3,017,558 |
| 2.46E-08 | 13.6 | 1.79E-01 | 3,035,195 |
| 2.46E-08 | 0    | 5.77E-01 | 3,017,733 |
| 2.47E-08 | 4.7  | 3.65E-01 | 3,037,499 |
| 2.48E-08 | 5.7  | 3.44E-01 | 3,035,786 |
| 2.49E-08 | 15.3 | 1.46E-01 | 3,035,804 |
| 2.51E-08 | 26.7 | 2.41E-02 | 3,036,702 |
| 2.51E-08 | 3.4  | 4.08E-01 | 2,977,050 |
| 2.51E-08 | 0.1  | 4.75E-01 | 3,037,499 |
| 2.52E-08 | 11.7 | 2.10E-01 | 3,037,499 |
| 2.53E-08 | 8.1  | 2.86E-01 | 3,037,499 |
| 2.53E-08 | 3.6  | 3.94E-01 | 3,027,690 |
| 2.53E-08 | 0    | 5.24E-01 | 3,035,873 |
| 2.53E-08 | 14.8 | 1.57E-01 | 3,031,000 |

|          |      |          |           |
|----------|------|----------|-----------|
| 2.55E-08 | 11.2 | 2.24E-01 | 3,019,258 |
| 2.55E-08 | 34.4 | 6.69E-02 | 2,910,100 |
| 2.55E-08 | 6.8  | 3.16E-01 | 3,037,499 |
| 2.55E-08 | 12.5 | 1.93E-01 | 3,037,499 |
| 2.56E-08 | 14.5 | 1.62E-01 | 3,033,371 |
| 2.56E-08 | 0    | 6.33E-01 | 3,037,499 |
| 2.57E-08 | 0    | 5.06E-01 | 2,975,720 |
| 2.57E-08 | 2.6  | 4.15E-01 | 3,037,499 |
| 2.58E-08 | 0    | 5.95E-01 | 2,814,765 |
| 2.59E-08 | 13.2 | 2.04E-01 | 2,998,969 |
| 2.61E-08 | 16.6 | 1.23E-01 | 3,037,499 |
| 2.61E-08 | 0    | 8.13E-01 | 3,023,791 |
| 2.62E-08 | 2.8  | 4.11E-01 | 3,035,786 |
| 2.63E-08 | 5.6  | 3.45E-01 | 3,037,499 |
| 2.64E-08 | 0    | 5.80E-01 | 3,036,702 |
| 2.65E-08 | 0    | 7.66E-01 | 3,037,499 |
| 2.66E-08 | 19.5 | 8.45E-02 | 3,036,702 |
| 2.66E-08 | 0    | 6.15E-01 | 3,037,499 |
| 2.67E-08 | 10.5 | 2.35E-01 | 3,036,702 |
| 2.67E-08 | 0    | 5.55E-01 | 3,014,464 |
| 2.68E-08 | 0    | 5.37E-01 | 3,018,477 |
| 2.69E-08 | 1.3  | 4.48E-01 | 3,035,894 |
| 2.70E-08 | 30.5 | 1.09E-02 | 3,020,814 |
| 2.74E-08 | 0    | 8.31E-01 | 2,993,027 |
| 2.74E-08 | 16.4 | 1.27E-01 | 3,035,786 |
| 2.75E-08 | 0    | 8.32E-01 | 3,035,786 |
| 2.75E-08 | 8.1  | 2.89E-01 | 3,036,702 |
| 2.75E-08 | 20   | 7.70E-02 | 3,037,499 |
| 2.75E-08 | 25.2 | 4.17E-02 | 3,002,386 |
| 2.75E-08 | 0    | 8.72E-01 | 3,034,989 |
| 2.75E-08 | 3.7  | 3.91E-01 | 3,035,804 |
| 2.76E-08 | 2.9  | 4.08E-01 | 3,037,499 |
| 2.76E-08 | 3.7  | 3.92E-01 | 3,010,533 |
| 2.77E-08 | 0    | 7.44E-01 | 2,822,336 |
| 2.78E-08 | 0    | 5.76E-01 | 3,037,499 |
| 2.79E-08 | 20.4 | 7.37E-02 | 3,036,702 |
| 2.79E-08 | 30.5 | 9.59E-03 | 3,037,499 |
| 2.79E-08 | 0    | 7.11E-01 | 3,037,129 |
| 2.80E-08 | 0    | 8.02E-01 | 2,999,138 |
| 2.81E-08 | 0    | 5.42E-01 | 3,036,955 |
| 2.82E-08 | 0    | 8.84E-01 | 3,037,499 |
| 2.82E-08 | 0    | 5.02E-01 | 3,028,553 |
| 2.82E-08 | 5.6  | 3.45E-01 | 3,024,960 |
| 2.83E-08 | 18   | 2.26E-01 | 2,870,909 |
| 2.83E-08 | 23   | 6.95E-02 | 2,993,381 |
| 2.83E-08 | 0    | 5.52E-01 | 3,037,499 |
| 2.85E-08 | 16.4 | 1.29E-01 | 3,032,517 |
| 2.85E-08 | 0    | 7.67E-01 | 3,013,515 |



|          |      |          |           |
|----------|------|----------|-----------|
| 2.85E-08 | 16.5 | 1.34E-01 | 3,012,654 |
| 2.85E-08 | 6    | 3.35E-01 | 3,037,499 |
| 2.87E-08 | 21.2 | 6.41E-02 | 3,037,499 |
| 2.89E-08 | 0    | 7.67E-01 | 3,019,996 |
| 2.89E-08 | 0    | 5.81E-01 | 3,036,702 |
| 2.89E-08 | 14.2 | 1.68E-01 | 2,997,550 |
| 2.91E-08 | 0    | 7.91E-01 | 3,032,508 |
| 2.93E-08 | 0    | 1.00E+00 | 2,272,216 |
| 2.95E-08 | 0.8  | 4.59E-01 | 3,000,598 |
| 2.96E-08 | 0    | 7.82E-01 | 3,037,499 |
| 2.96E-08 | 24.2 | 3.93E-02 | 3,000,868 |
| 2.97E-08 | 0    | 5.70E-01 | 2,516,805 |
| 2.97E-08 | 0    | 4.95E-01 | 3,037,499 |
| 2.98E-08 | 0    | 6.52E-01 | 2,893,857 |
| 2.98E-08 | 0    | 8.37E-01 | 2,947,830 |
| 2.99E-08 | 6.8  | 3.18E-01 | 3,036,955 |
| 2.99E-08 | 11   | 2.27E-01 | 3,000,071 |
| 2.99E-08 | 14.5 | 1.72E-01 | 3,013,186 |
| 3.00E-08 | 0    | 9.95E-01 | 3,036,702 |
| 3.01E-08 | 0    | 8.70E-01 | 3,024,163 |
| 3.01E-08 | 10.3 | 2.40E-01 | 3,035,066 |
| 3.01E-08 | 2    | 4.31E-01 | 3,036,702 |
| 3.02E-08 | 0    | 8.46E-01 | 3,037,499 |
| 3.02E-08 | 20.2 | 7.44E-02 | 3,037,499 |
| 3.03E-08 | 0    | 6.37E-01 | 3,033,043 |
| 3.03E-08 | 5.4  | 3.50E-01 | 3,036,702 |
| 3.04E-08 | 9.5  | 2.58E-01 | 3,034,269 |
| 3.04E-08 | 30.1 | 1.13E-02 | 3,036,158 |
| 3.05E-08 | 13.5 | 1.76E-01 | 3,024,960 |
| 3.06E-08 | 11.9 | 2.27E-01 | 3,002,781 |
| 3.07E-08 | 10.5 | 2.38E-01 | 3,036,158 |
| 3.07E-08 | 9.1  | 2.70E-01 | 3,016,748 |
| 3.08E-08 | 0.1  | 4.76E-01 | 3,037,499 |
| 3.09E-08 | 0    | 8.58E-01 | 3,036,702 |
| 3.09E-08 | 5.1  | 3.59E-01 | 3,020,814 |
| 3.10E-08 | 5.4  | 3.55E-01 | 3,022,208 |
| 3.10E-08 | 4.6  | 3.70E-01 | 3,034,989 |
| 3.11E-08 | 0    | 4.79E-01 | 3,035,786 |
| 3.12E-08 | 0    | 7.85E-01 | 2,983,210 |
| 3.14E-08 | 33.1 | 5.42E-03 | 3,020,814 |
| 3.14E-08 | 8.7  | 2.99E-01 | 3,004,285 |
| 3.15E-08 | 26.4 | 2.86E-02 | 3,034,651 |
| 3.15E-08 | 4    | 3.83E-01 | 3,036,955 |
| 3.16E-08 | 2.2  | 4.31E-01 | 2,922,200 |
| 3.17E-08 | 13.4 | 1.81E-01 | 3,034,445 |
| 3.18E-08 | 12.4 | 1.98E-01 | 3,036,702 |
| 3.20E-08 | 11.1 | 2.25E-01 | 3,023,247 |
| 3.21E-08 | 0    | 7.65E-01 | 763,570   |

|          |      |          |           |
|----------|------|----------|-----------|
| 3.22E-08 | 2    | 4.31E-01 | 3,013,094 |
| 3.24E-08 | 0    | 6.54E-01 | 3,037,499 |
| 3.26E-08 | 0    | 7.26E-01 | 2,988,004 |
| 3.26E-08 | 30.1 | 2.44E-02 | 2,989,550 |
| 3.26E-08 | 4.4  | 3.74E-01 | 3,036,702 |
| 3.28E-08 | 0    | 7.35E-01 | 3,027,592 |
| 3.28E-08 | 12   | 2.03E-01 | 3,037,499 |
| 3.29E-08 | 12.7 | 1.90E-01 | 3,037,499 |
| 3.29E-08 | 13   | 1.87E-01 | 3,033,433 |
| 3.29E-08 | 0    | 6.98E-01 | 3,037,499 |
| 3.30E-08 | 0    | 9.29E-01 | 3,037,499 |
| 3.34E-08 | 15.6 | 1.40E-01 | 3,036,702 |
| 3.34E-08 | 6.2  | 3.32E-01 | 3,023,247 |
| 3.35E-08 | 4.9  | 3.60E-01 | 3,037,499 |
| 3.37E-08 | 5.5  | 3.47E-01 | 3,034,989 |
| 3.38E-08 | 20   | 7.99E-02 | 2,998,435 |
| 3.38E-08 | 0    | 5.72E-01 | 3,036,158 |
| 3.40E-08 | 0    | 5.09E-01 | 2,980,089 |
| 3.41E-08 | 0    | 9.88E-01 | 3,035,786 |
| 3.42E-08 | 0    | 5.44E-01 | 2,991,549 |
| 3.43E-08 | 1.8  | 4.39E-01 | 2,954,409 |
| 3.45E-08 | 12   | 2.06E-01 | 3,036,955 |
| 3.46E-08 | 10.7 | 2.29E-01 | 3,037,499 |
| 3.46E-08 | 17.7 | 1.09E-01 | 3,034,269 |
| 3.47E-08 | 0    | 5.08E-01 | 2,930,119 |
| 3.48E-08 | 31.7 | 6.99E-02 | 2,876,989 |
| 3.48E-08 | 26.7 | 2.30E-02 | 3,037,499 |
| 3.49E-08 | 5.2  | 3.57E-01 | 3,023,845 |
| 3.49E-08 | 0    | 7.29E-01 | 3,034,989 |
| 3.50E-08 | 4.5  | 3.70E-01 | 3,037,499 |
| 3.51E-08 | 0.9  | 4.55E-01 | 3,037,499 |
| 3.51E-08 | 28.6 | 2.37E-01 | 2,713,337 |
| 3.52E-08 | 8.8  | 3.21E-01 | 2,943,835 |
| 3.52E-08 | 15   | 1.50E-01 | 3,035,786 |
| 3.53E-08 | 10.6 | 2.33E-01 | 3,036,702 |
| 3.53E-08 | 0    | 6.25E-01 | 3,034,989 |
| 3.57E-08 | 0    | 8.85E-01 | 3,037,499 |
| 3.58E-08 | 17.5 | 1.10E-01 | 3,035,786 |
| 3.59E-08 | 0    | 5.08E-01 | 3,023,247 |
| 3.59E-08 | 12.3 | 1.99E-01 | 3,037,499 |
| 3.59E-08 | 0    | 6.44E-01 | 3,037,499 |
| 3.59E-08 | 0    | 6.06E-01 | 3,035,066 |
| 3.60E-08 | 19.7 | 8.36E-02 | 3,000,324 |
| 3.60E-08 | 15.8 | 1.38E-01 | 3,034,989 |
| 3.61E-08 | 0    | 7.13E-01 | 3,035,786 |
| 3.61E-08 | 0.8  | 4.58E-01 | 3,008,730 |
| 3.61E-08 | 0    | 7.74E-01 | 3,016,370 |
| 3.62E-08 | 0    | 1.00E+00 | 2,272,216 |

|          |      |          |           |
|----------|------|----------|-----------|
| 3.62E-08 | 0    | 9.68E-01 | 3,036,702 |
| 3.62E-08 | 7.3  | 3.06E-01 | 3,037,499 |
| 3.63E-08 | 2.3  | 4.23E-01 | 3,035,786 |
| 3.64E-08 | 0    | 1.00E+00 | 2,272,216 |
| 3.65E-08 | 0    | 4.80E-01 | 2,998,125 |
| 3.66E-08 | 4.1  | 3.89E-01 | 2,948,226 |
| 3.66E-08 | 4.6  | 3.68E-01 | 3,037,499 |
| 3.66E-08 | 0    | 8.01E-01 | 2,787,495 |
| 3.67E-08 | 9.3  | 2.67E-01 | 3,030,824 |
| 3.67E-08 | 0    | 6.65E-01 | 3,037,499 |
| 3.69E-08 | 0    | 9.57E-01 | 2,980,911 |
| 3.69E-08 | 15.7 | 1.36E-01 | 3,037,499 |
| 3.69E-08 | 23.9 | 4.13E-02 | 3,037,129 |
| 3.70E-08 | 5.9  | 3.65E-01 | 1,301,704 |
| 3.71E-08 | 0    | 5.70E-01 | 3,036,955 |
| 3.71E-08 | 0    | 7.66E-01 | 3,016,900 |
| 3.71E-08 | 0    | 4.87E-01 | 3,034,989 |
| 3.71E-08 | 0    | 5.23E-01 | 3,020,956 |
| 3.71E-08 | 0    | 8.37E-01 | 3,037,499 |
| 3.71E-08 | 2.3  | 4.23E-01 | 3,036,955 |
| 3.71E-08 | 0    | 7.37E-01 | 3,028,980 |
| 3.71E-08 | 8.7  | 2.83E-01 | 3,012,734 |
| 3.73E-08 | 15.7 | 1.37E-01 | 3,037,499 |
| 3.75E-08 | 14.8 | 1.56E-01 | 3,034,091 |
| 3.78E-08 | 7.2  | 3.07E-01 | 3,037,499 |
| 3.78E-08 | 8.2  | 2.91E-01 | 3,030,824 |
| 3.80E-08 | 1.9  | 4.32E-01 | 3,031,809 |
| 3.80E-08 | 18.2 | 1.01E-01 | 3,036,702 |
| 3.80E-08 | 0    | 7.44E-01 | 3,037,499 |
| 3.81E-08 | 0    | 5.81E-01 | 3,023,247 |
| 3.82E-08 | 0    | 9.69E-01 | 2,904,038 |
| 3.83E-08 | 19.5 | 8.73E-02 | 3,034,091 |
| 3.84E-08 | 4.4  | 3.74E-01 | 3,037,499 |
| 3.85E-08 | 11.3 | 2.17E-01 | 3,037,499 |
| 3.85E-08 | 0    | 8.00E-01 | 3,035,786 |
| 3.86E-08 | 0    | 8.19E-01 | 3,017,003 |
| 3.87E-08 | 0    | 7.42E-01 | 3,035,786 |
| 3.87E-08 | 0    | 6.46E-01 | 2,993,453 |
| 3.88E-08 | 0    | 9.00E-01 | 3,035,786 |
| 3.88E-08 | 7.4  | 3.10E-01 | 3,014,231 |
| 3.89E-08 | 5.3  | 3.53E-01 | 3,023,247 |
| 3.90E-08 | 0    | 8.49E-01 | 3,015,306 |
| 3.91E-08 | 0    | 9.97E-01 | 3,036,238 |
| 3.91E-08 | 8.2  | 2.87E-01 | 3,036,702 |
| 3.92E-08 | 13.2 | 1.88E-01 | 3,030,861 |
| 3.94E-08 | 6.4  | 3.66E-01 | 2,930,175 |
| 3.95E-08 | 0    | 6.02E-01 | 3,036,702 |
| 3.96E-08 | 0    | 6.16E-01 | 3,036,702 |

|          |      |          |           |
|----------|------|----------|-----------|
| 3.97E-08 | 10.2 | 2.45E-01 | 3,033,316 |
| 3.98E-08 | 16.5 | 1.25E-01 | 3,036,702 |
| 3.98E-08 | 2.3  | 4.24E-01 | 3,037,499 |
| 3.98E-08 | 9    | 2.67E-01 | 3,037,499 |
| 3.98E-08 | 10.2 | 2.43E-01 | 3,035,894 |
| 3.98E-08 | 0    | 9.95E-01 | 2,869,380 |
| 4.00E-08 | 18.2 | 1.83E-01 | 2,456,867 |
| 4.01E-08 | 0    | 5.39E-01 | 3,037,499 |
| 4.01E-08 | 44.5 | 4.19E-02 | 2,826,765 |
| 4.01E-08 | 10.2 | 2.77E-01 | 2,975,203 |
| 4.01E-08 | 20.6 | 7.03E-02 | 3,037,499 |
| 4.03E-08 | 0    | 8.50E-01 | 3,037,499 |
| 4.04E-08 | 11   | 2.24E-01 | 3,037,499 |
| 4.05E-08 | 25.7 | 1.05E-01 | 2,928,554 |
| 4.06E-08 | 0    | 9.17E-01 | 2,982,682 |
| 4.07E-08 | 0    | 8.16E-01 | 2,893,903 |
| 4.08E-08 | 8    | 3.01E-01 | 3,011,004 |
| 4.09E-08 | 0    | 8.66E-01 | 3,019,258 |
| 4.09E-08 | 12.4 | 1.97E-01 | 3,000,868 |
| 4.10E-08 | 0    | 9.67E-01 | 2,992,843 |
| 4.11E-08 | 0    | 6.60E-01 | 3,036,702 |
| 4.11E-08 | 0    | 6.30E-01 | 3,034,269 |
| 4.13E-08 | 2    | 4.29E-01 | 3,037,499 |
| 4.13E-08 | 0    | 5.99E-01 | 3,023,265 |
| 4.13E-08 | 10.8 | 2.31E-01 | 3,000,868 |
| 4.14E-08 | 0    | 5.31E-01 | 2,856,588 |
| 4.15E-08 | 0    | 8.71E-01 | 3,022,544 |
| 4.15E-08 | 0    | 8.81E-01 | 2,925,139 |
| 4.15E-08 | 24.9 | 3.40E-02 | 3,000,868 |
| 4.19E-08 | 32.1 | 9.19E-03 | 3,021,446 |
| 4.19E-08 | 0    | 7.10E-01 | 3,037,499 |
| 4.19E-08 | 0    | 8.35E-01 | 3,024,163 |
| 4.20E-08 | 22.9 | 4.94E-02 | 3,036,702 |
| 4.23E-08 | 2.8  | 4.11E-01 | 3,036,702 |
| 4.24E-08 | 0    | 9.15E-01 | 3,037,499 |
| 4.25E-08 | 0    | 9.64E-01 | 3,037,499 |
| 4.25E-08 | 24   | 3.99E-02 | 3,037,499 |
| 4.26E-08 | 17   | 1.16E-01 | 3,037,499 |
| 4.27E-08 | 2.9  | 4.10E-01 | 3,017,500 |
| 4.29E-08 | 0    | 5.15E-01 | 3,019,064 |
| 4.31E-08 | 0    | 5.49E-01 | 2,950,739 |
| 4.32E-08 | 12.6 | 1.99E-01 | 3,021,552 |
| 4.32E-08 | 0    | 7.14E-01 | 3,037,499 |
| 4.34E-08 | 0    | 5.99E-01 | 2,978,146 |
| 4.35E-08 | 0    | 8.01E-01 | 3,037,499 |
| 4.35E-08 | 0    | 9.47E-01 | 3,036,702 |
| 4.37E-08 | 0    | 7.51E-01 | 2,871,697 |
| 4.37E-08 | 0    | 6.88E-01 | 3,033,966 |

|          |      |          |           |
|----------|------|----------|-----------|
| 4.37E-08 | 78.9 | 2.94E-02 | 2,713,337 |
| 4.38E-08 | 2.7  | 4.21E-01 | 2,960,423 |
| 4.38E-08 | 12.1 | 2.04E-01 | 3,036,702 |
| 4.39E-08 | 0    | 9.53E-01 | 2,851,676 |
| 4.40E-08 | 1.7  | 4.37E-01 | 3,034,230 |
| 4.40E-08 | 20.2 | 7.99E-02 | 3,031,658 |
| 4.42E-08 | 12   | 3.21E-01 | 2,825,406 |
| 4.43E-08 | 0    | 7.83E-01 | 3,036,702 |
| 4.44E-08 | 4.4  | 3.74E-01 | 3,030,170 |
| 4.44E-08 | 22.5 | 8.94E-02 | 2,978,186 |
| 4.44E-08 | 0    | 8.46E-01 | 2,955,576 |
| 4.44E-08 | 0    | 6.98E-01 | 3,024,163 |
| 4.45E-08 | 0    | 7.34E-01 | 3,019,978 |
| 4.45E-08 | 7.2  | 3.08E-01 | 3,035,786 |
| 4.46E-08 | 0    | 8.72E-01 | 3,036,702 |
| 4.47E-08 | 12.6 | 2.07E-01 | 3,000,093 |
| 4.47E-08 | 3.2  | 4.02E-01 | 3,034,269 |
| 4.49E-08 | 0    | 9.48E-01 | 3,011,921 |
| 4.50E-08 | 0    | 9.66E-01 | 3,037,499 |
| 4.53E-08 | 0    | 7.15E-01 | 3,024,416 |
| 4.53E-08 | 24.3 | 3.87E-02 | 3,035,066 |
| 4.55E-08 | 6.3  | 3.36E-01 | 3,021,309 |
| 4.55E-08 | 24.1 | 4.12E-02 | 3,034,989 |
| 4.56E-08 | 0    | 8.77E-01 | 3,024,960 |
| 4.57E-08 | 4    | 3.81E-01 | 3,037,499 |
| 4.57E-08 | 11.1 | 2.43E-01 | 2,999,392 |
| 4.58E-08 | 0    | 7.04E-01 | 3,037,499 |
| 4.62E-08 | 0    | 7.36E-01 | 3,032,809 |
| 4.62E-08 | 3.6  | 3.91E-01 | 3,037,499 |
| 4.65E-08 | 0    | 6.42E-01 | 3,022,450 |
| 4.66E-08 | 0    | 9.79E-01 | 3,018,205 |
| 4.66E-08 | 1.2  | 4.48E-01 | 3,000,868 |
| 4.67E-08 | 0    | 7.69E-01 | 3,037,499 |
| 4.67E-08 | 2.9  | 4.13E-01 | 3,005,433 |
| 4.69E-08 | 0    | 1.00E+00 | 2,272,216 |
| 4.71E-08 | 0    | 9.98E-01 | 3,034,989 |
| 4.72E-08 | 11.3 | 2.90E-01 | 2,907,540 |
| 4.72E-08 | 0    | 8.78E-01 | 3,035,804 |
| 4.74E-08 | 7.3  | 3.08E-01 | 3,032,012 |
| 4.75E-08 | 26.2 | 2.66E-02 | 3,035,786 |
| 4.77E-08 | 0    | 9.08E-01 | 3,036,702 |
| 4.78E-08 | 0    | 9.00E-01 | 3,000,875 |
| 4.79E-08 | 0    | 8.11E-01 | 3,015,750 |
| 4.81E-08 | 16.2 | 1.29E-01 | 3,037,499 |
| 4.81E-08 | 0    | 8.06E-01 | 2,961,823 |
| 4.82E-08 | 0    | 9.93E-01 | 2,882,210 |
| 4.82E-08 | 0    | 7.64E-01 | 3,037,499 |
| 4.82E-08 | 0    | 6.39E-01 | 2,713,337 |

|          |      |          |           |
|----------|------|----------|-----------|
| 4.86E-08 | 0    | 6.66E-01 | 3,036,702 |
| 4.87E-08 | 10.1 | 2.47E-01 | 3,034,212 |
| 4.87E-08 | 11.6 | 2.12E-01 | 3,035,066 |
| 4.87E-08 | 19.1 | 8.78E-02 | 3,037,499 |
| 4.89E-08 | 0    | 1.00E+00 | 2,272,216 |
| 4.90E-08 | 12.6 | 1.94E-01 | 3,035,786 |
| 4.91E-08 | 0    | 7.31E-01 | 3,037,499 |
| 4.91E-08 | 7.5  | 3.02E-01 | 3,036,702 |
| 4.92E-08 | 3.4  | 3.98E-01 | 3,030,861 |
| 4.94E-08 | 0    | 8.47E-01 | 3,037,499 |
| 4.94E-08 | 1.4  | 4.44E-01 | 3,036,702 |
| 4.95E-08 | 15.8 | 1.34E-01 | 3,037,499 |
| 4.97E-08 | 11.5 | 2.14E-01 | 3,037,499 |
| 4.97E-08 | 6.1  | 3.41E-01 | 3,013,589 |
| 4.97E-08 | 7    | 3.12E-01 | 3,037,499 |
| 4.98E-08 | 0    | 9.21E-01 | 2,904,211 |
| 4.98E-08 | 15.6 | 1.59E-01 | 3,005,848 |
| 5.00E-08 | 0    | 9.17E-01 | 3,023,247 |
| 5.00E-08 | 3.6  | 3.91E-01 | 3,036,702 |

---

l by  $P$  value. Chromosome (Chr) and base pair (BP)  
 -sided  $Z$ -test statistics that have been adjusted by an  
 '5,380 SNPs is 3.881/6.456 (adjusted and unadjusted,

**Supplementary Table 2. Association results for the 2,925 SNPs that reached genome-wide significance ( $P < 5 \times 10^{-8}$ ) in t**

| SNP         | Chr | BP         | Effect allele | Other allele | Effect allele frequency | Effect size | S.E.   | <i>P</i> value |
|-------------|-----|------------|---------------|--------------|-------------------------|-------------|--------|----------------|
| rs7070545   | 10  | 1,055,868  | A             | G            | 0.6319                  | -0.0062     | 0.0011 | 8.89E-09       |
| rs10903706  | 10  | 2,271,259  | T             | C            | 0.6665                  | 0.0061      | 0.0011 | 4.95E-08       |
| rs12240387  | 10  | 2,664,712  | A             | G            | 0.3646                  | -0.0060     | 0.0011 | 3.59E-08       |
| rs4881269   | 10  | 4,031,519  | A             | G            | 0.3737                  | 0.0104      | 0.0011 | 6.07E-22       |
| rs17342732  | 10  | 4,146,151  | A             | G            | 0.0798                  | 0.0073      | 0.0019 | 1.64E-04       |
| rs1348459   | 10  | 4,641,583  | A             | G            | 0.4237                  | 0.0048      | 0.0011 | 6.95E-06       |
| rs11595166  | 10  | 4,811,925  | T             | C            | 0.0813                  | 0.0132      | 0.0019 | 5.54E-12       |
| rs4748333   | 10  | 6,773,897  | T             | C            | 0.3606                  | -0.0050     | 0.0011 | 4.23E-06       |
| rs72773855  | 10  | 7,240,876  | A             | G            | 0.2255                  | -0.0055     | 0.0013 | 1.22E-05       |
| rs12783434  | 10  | 8,505,597  | T             | C            | 0.9852                  | 0.0246      | 0.0044 | 1.92E-08       |
| rs10795708  | 10  | 9,421,417  | A             | G            | 0.2360                  | -0.0078     | 0.0012 | 2.43E-10       |
| rs2066127   | 10  | 10,026,007 | A             | G            | 0.4778                  | 0.0079      | 0.0010 | 3.43E-14       |
| rs1889256   | 10  | 10,254,839 | A             | G            | 0.7644                  | 0.0101      | 0.0012 | 2.94E-16       |
| rs12355354  | 10  | 10,906,628 | T             | C            | 0.1841                  | 0.0109      | 0.0014 | 5.25E-16       |
| rs9423837   | 10  | 10,922,346 | A             | G            | 0.6134                  | 0.0001      | 0.0011 | 9.40E-01       |
| rs1291865   | 10  | 11,082,192 | T             | G            | 0.5105                  | -0.0103     | 0.0010 | 6.83E-23       |
| rs35345466  | 10  | 11,604,399 | A             | T            | 0.2641                  | 0.0073      | 0.0012 | 7.13E-10       |
| rs10752262  | 10  | 12,395,100 | T             | C            | 0.4177                  | 0.0093      | 0.0011 | 2.08E-18       |
| rs10906209  | 10  | 12,740,082 | A             | C            | 0.4583                  | -0.0080     | 0.0011 | 4.42E-14       |
| rs963121    | 10  | 14,691,246 | C             | G            | 0.5258                  | -0.0066     | 0.0010 | 2.65E-10       |
| rs10764493  | 10  | 18,727,999 | A             | G            | 0.8892                  | 0.0132      | 0.0017 | 3.06E-15       |
| rs1339051   | 10  | 19,231,108 | T             | C            | 0.3961                  | 0.0055      | 0.0011 | 2.75E-07       |
| rs11011859  | 10  | 20,487,702 | A             | G            | 0.8828                  | 0.0113      | 0.0016 | 3.88E-12       |
| rs11011932  | 10  | 20,576,790 | T             | C            | 0.2329                  | 0.0086      | 0.0012 | 4.66E-12       |
| rs75624301  | 10  | 20,580,242 | T             | C            | 0.9677                  | -0.0100     | 0.0030 | 7.15E-04       |
| rs10828248  | 10  | 21,824,619 | A             | G            | 0.6414                  | 0.0082      | 0.0011 | 8.85E-14       |
| rs1888765   | 10  | 23,943,839 | C             | G            | 0.7758                  | 0.0090      | 0.0013 | 7.09E-13       |
| rs7092442   | 10  | 24,281,926 | C             | G            | 0.6187                  | -0.0047     | 0.0011 | 1.21E-05       |
| rs7074897   | 10  | 26,539,683 | A             | T            | 0.8191                  | 0.0080      | 0.0014 | 4.47E-09       |
| rs7077524   | 10  | 31,023,266 | A             | G            | 0.3689                  | 0.0078      | 0.0011 | 8.34E-13       |
| rs7095095   | 10  | 31,361,464 | A             | G            | 0.7981                  | 0.0094      | 0.0013 | 5.27E-13       |
| rs2797131   | 10  | 32,085,988 | A             | G            | 0.2200                  | 0.0076      | 0.0013 | 2.12E-09       |
| rs2506141   | 10  | 33,468,014 | T             | C            | 0.5275                  | 0.0068      | 0.0010 | 9.67E-11       |
| rs12257894  | 10  | 33,608,933 | A             | G            | 0.0620                  | -0.0106     | 0.0022 | 9.44E-07       |
| rs224697    | 10  | 34,289,562 | A             | T            | 0.2633                  | 0.0049      | 0.0012 | 3.78E-05       |
| rs10763979  | 10  | 34,602,764 | A             | G            | 0.6215                  | 0.0092      | 0.0011 | 1.48E-17       |
| rs60845448  | 10  | 43,721,462 | T             | C            | 0.1751                  | -0.0074     | 0.0014 | 7.62E-08       |
| rs10994470  | 10  | 51,558,660 | A             | G            | 0.0390                  | 0.0200      | 0.0027 | 2.12E-13       |
| rs12146177  | 10  | 51,807,814 | T             | G            | 0.3744                  | -0.0059     | 0.0011 | 6.85E-08       |
| rs10995839  | 10  | 52,900,447 | A             | C            | 0.8424                  | -0.0084     | 0.0014 | 5.24E-09       |
| rs6480307   | 10  | 53,297,775 | C             | G            | 0.1398                  | 0.0059      | 0.0015 | 9.35E-05       |
| rs116193437 | 10  | 53,527,105 | A             | C            | 0.0258                  | 0.0190      | 0.0034 | 2.31E-08       |
| rs2454547   | 10  | 53,757,107 | C             | G            | 0.4123                  | -0.0081     | 0.0011 | 1.92E-14       |
| rs10740572  | 10  | 55,838,740 | A             | T            | 0.7773                  | -0.0084     | 0.0013 | 1.92E-11       |
| rs2061485   | 10  | 62,105,627 | T             | C            | 0.5122                  | 0.0075      | 0.0010 | 8.37E-13       |
| rs2588966   | 10  | 63,609,810 | T             | C            | 0.4527                  | 0.0067      | 0.0011 | 2.02E-10       |

|            |    |             |   |   |        |         |        |          |
|------------|----|-------------|---|---|--------|---------|--------|----------|
| rs12761779 | 10 | 63,782,043  | C | G | 0.6465 | -0.0066 | 0.0011 | 2.36E-09 |
| rs72829007 | 10 | 64,087,955  | T | G | 0.9506 | 0.0127  | 0.0024 | 1.90E-07 |
| rs10821992 | 10 | 64,163,029  | A | T | 0.3412 | -0.0080 | 0.0011 | 5.86E-13 |
| rs11592442 | 10 | 64,533,904  | A | T | 0.4237 | -0.0032 | 0.0011 | 2.25E-03 |
| rs7924036  | 10 | 65,191,645  | T | G | 0.5115 | 0.0141  | 0.0010 | 1.86E-41 |
| rs3845187  | 10 | 65,515,652  | A | G | 0.4154 | 0.0079  | 0.0011 | 8.34E-14 |
| rs10822275 | 10 | 65,818,459  | A | G | 0.8319 | 0.0089  | 0.0014 | 2.10E-10 |
| rs35377646 | 10 | 66,652,165  | A | G | 0.8382 | -0.0100 | 0.0016 | 9.98E-11 |
| rs74740938 | 10 | 66,921,055  | A | T | 0.1186 | 0.0121  | 0.0016 | 8.30E-14 |
| rs1670167  | 10 | 67,719,774  | A | G | 0.7334 | -0.0061 | 0.0012 | 2.64E-07 |
| rs12359372 | 10 | 67,767,951  | T | C | 0.6616 | -0.0098 | 0.0011 | 7.16E-19 |
| rs7919781  | 10 | 67,850,322  | A | G | 0.1990 | -0.0113 | 0.0013 | 5.85E-18 |
| rs10762069 | 10 | 68,208,954  | C | G | 0.6818 | 0.0105  | 0.0011 | 9.70E-21 |
| rs6480222  | 10 | 68,580,501  | A | T | 0.8233 | 0.0088  | 0.0014 | 1.69E-10 |
| rs77899607 | 10 | 68,691,900  | T | C | 0.1300 | 0.0131  | 0.0016 | 6.50E-17 |
| rs10998036 | 10 | 70,016,678  | C | G | 0.2350 | -0.0089 | 0.0012 | 5.13E-13 |
| rs7082623  | 10 | 72,890,375  | T | C | 0.6895 | 0.0073  | 0.0011 | 1.42E-10 |
| rs10740382 | 10 | 73,269,296  | A | G | 0.6197 | 0.0051  | 0.0011 | 2.52E-06 |
| rs11000015 | 10 | 73,571,883  | T | C | 0.0852 | -0.0084 | 0.0019 | 6.62E-06 |
| rs4262652  | 10 | 74,127,853  | A | G | 0.6331 | -0.0081 | 0.0011 | 1.57E-13 |
| rs1134777  | 10 | 75,538,651  | C | G | 0.7507 | -0.0099 | 0.0012 | 3.62E-16 |
| rs79708660 | 10 | 75,785,466  | A | G | 0.2255 | -0.0087 | 0.0013 | 1.09E-11 |
| rs10824080 | 10 | 75,893,634  | A | G | 0.6171 | -0.0067 | 0.0011 | 4.67E-10 |
| rs2488697  | 10 | 77,054,052  | T | C | 0.2711 | -0.0095 | 0.0012 | 5.88E-16 |
| rs4617527  | 10 | 77,257,791  | T | G | 0.1259 | -0.0088 | 0.0016 | 2.27E-08 |
| rs11001967 | 10 | 78,768,415  | A | G | 0.4364 | -0.0062 | 0.0011 | 4.13E-09 |
| rs755043   | 10 | 80,110,426  | A | G | 0.5115 | -0.0064 | 0.0010 | 1.22E-09 |
| rs946516   | 10 | 80,609,135  | T | C | 0.6528 | 0.0062  | 0.0011 | 1.44E-08 |
| rs2345617  | 10 | 82,797,583  | C | G | 0.2747 | -0.0074 | 0.0012 | 2.33E-10 |
| rs1591731  | 10 | 83,403,409  | C | G | 0.3623 | 0.0059  | 0.0011 | 5.82E-08 |
| rs10736248 | 10 | 84,943,416  | C | G | 0.3415 | -0.0070 | 0.0011 | 2.52E-10 |
| rs10887465 | 10 | 87,016,897  | A | C | 0.2658 | 0.0128  | 0.0012 | 4.91E-27 |
| rs2352430  | 10 | 87,800,136  | T | C | 0.7703 | -0.0078 | 0.0012 | 3.11E-10 |
| rs1902694  | 10 | 87,941,625  | A | C | 0.2387 | 0.0055  | 0.0012 | 8.79E-06 |
| rs4934173  | 10 | 88,020,583  | A | G | 0.1962 | -0.0074 | 0.0013 | 2.37E-08 |
| rs2576172  | 10 | 90,255,615  | T | C | 0.6204 | -0.0073 | 0.0011 | 1.42E-11 |
| rs4933646  | 10 | 92,892,942  | T | C | 0.4762 | -0.0054 | 0.0010 | 2.42E-07 |
| rs2421694  | 10 | 93,516,104  | A | G | 0.5686 | -0.0083 | 0.0011 | 2.99E-15 |
| rs12358273 | 10 | 94,408,857  | T | G | 0.0441 | 0.0141  | 0.0026 | 4.38E-08 |
| rs3736936  | 10 | 94,773,667  | A | G | 0.2830 | -0.0073 | 0.0012 | 4.38E-10 |
| rs11187572 | 10 | 95,409,668  | A | G | 0.4927 | 0.0056  | 0.0010 | 1.11E-07 |
| rs6583943  | 10 | 96,259,443  | A | G | 0.4353 | -0.0059 | 0.0011 | 2.74E-08 |
| rs7078184  | 10 | 98,250,191  | A | G | 0.1968 | -0.0081 | 0.0013 | 7.59E-10 |
| rs871988   | 10 | 99,003,375  | A | C | 0.6694 | 0.0062  | 0.0011 | 2.52E-08 |
| rs12242465 | 10 | 99,763,166  | A | G | 0.3214 | -0.0098 | 0.0011 | 3.14E-18 |
| rs34955138 | 10 | 102,039,187 | T | G | 0.5756 | -0.0067 | 0.0011 | 2.80E-10 |
| rs3740484  | 10 | 102,747,363 | T | G | 0.3153 | 0.0096  | 0.0011 | 1.51E-17 |
| rs10786650 | 10 | 103,662,789 | T | C | 0.7050 | 0.0055  | 0.0011 | 1.95E-06 |



|             |    |             |   |   |        |         |        |          |
|-------------|----|-------------|---|---|--------|---------|--------|----------|
| rs11191193  | 10 | 103,802,408 | A | G | 0.6552 | 0.0163  | 0.0011 | 1.42E-49 |
| rs2479552   | 10 | 104,028,507 | A | C | 0.3772 | 0.0136  | 0.0011 | 1.56E-36 |
| rs1046411   | 10 | 104,837,816 | A | G | 0.3266 | -0.0124 | 0.0011 | 1.14E-28 |
| rs1628768   | 10 | 105,012,994 | T | C | 0.7642 | -0.0119 | 0.0012 | 6.53E-22 |
| rs11191652  | 10 | 105,075,736 | T | G | 0.8617 | 0.0129  | 0.0017 | 9.22E-15 |
| rs2491365   | 10 | 106,536,976 | T | C | 0.7297 | 0.0159  | 0.0012 | 2.08E-41 |
| rs1490176   | 10 | 106,560,225 | A | T | 0.7200 | 0.0048  | 0.0012 | 3.30E-05 |
| rs17197813  | 10 | 106,758,018 | T | C | 0.1350 | 0.0159  | 0.0015 | 3.02E-25 |
| rs727341    | 10 | 106,925,538 | T | C | 0.7765 | -0.0076 | 0.0013 | 1.41E-09 |
| rs12772959  | 10 | 107,567,083 | C | G | 0.1650 | 0.0133  | 0.0014 | 5.28E-21 |
| rs4522099   | 10 | 108,688,242 | C | G | 0.9314 | 0.0129  | 0.0021 | 4.60E-10 |
| rs1338955   | 10 | 109,059,174 | A | G | 0.0762 | -0.0131 | 0.0020 | 2.90E-11 |
| rs17126938  | 10 | 111,761,351 | T | C | 0.8604 | -0.0126 | 0.0015 | 5.79E-17 |
| rs943262    | 10 | 114,111,348 | C | G | 0.5288 | 0.0058  | 0.0010 | 3.20E-08 |
| rs7906919   | 10 | 114,440,341 | T | C | 0.3303 | -0.0072 | 0.0011 | 1.18E-10 |
| rs2104598   | 10 | 114,715,598 | A | G | 0.5300 | -0.0067 | 0.0011 | 2.56E-10 |
| rs7089262   | 10 | 114,893,489 | T | C | 0.0220 | -0.0177 | 0.0036 | 8.25E-07 |
| rs884507    | 10 | 115,118,856 | A | G | 0.0808 | -0.0084 | 0.0019 | 1.17E-05 |
| rs11196397  | 10 | 115,375,528 | A | C | 0.2731 | 0.0090  | 0.0012 | 2.22E-14 |
| rs10886010  | 10 | 118,546,590 | A | G | 0.4200 | -0.0087 | 0.0011 | 2.32E-16 |
| rs4752164   | 10 | 120,221,217 | T | C | 0.6499 | -0.0068 | 0.0011 | 4.74E-10 |
| rs4962661   | 10 | 126,266,790 | A | G | 0.3543 | 0.0047  | 0.0011 | 2.02E-05 |
| rs2629540   | 10 | 126,426,148 | C | G | 0.2457 | 0.0089  | 0.0012 | 2.74E-13 |
| rs11245450  | 10 | 126,658,075 | A | G | 0.4236 | 0.0069  | 0.0011 | 1.06E-10 |
| rs2886405   | 10 | 127,152,944 | T | G | 0.3604 | 0.0083  | 0.0011 | 2.71E-14 |
| rs10741228  | 10 | 129,152,153 | T | C | 0.4316 | -0.0064 | 0.0011 | 1.34E-09 |
| rs113173614 | 10 | 130,496,276 | T | C | 0.0923 | -0.0104 | 0.0018 | 1.21E-08 |
| rs12260313  | 10 | 131,692,815 | T | C | 0.2985 | 0.0071  | 0.0011 | 5.37E-10 |
| rs10765063  | 10 | 133,094,696 | A | G | 0.4732 | 0.0091  | 0.0010 | 4.96E-18 |
| rs17881016  | 10 | 133,729,181 | A | G | 0.7390 | -0.0131 | 0.0012 | 5.27E-28 |
| rs2035806   | 10 | 133,984,916 | A | G | 0.5482 | 0.0075  | 0.0011 | 1.38E-12 |
| rs12768641  | 10 | 134,966,154 | A | G | 0.7614 | 0.0094  | 0.0012 | 1.99E-14 |
| rs7936322   | 11 | 745,884     | T | C | 0.4945 | -0.0059 | 0.0010 | 2.04E-08 |
| rs12808343  | 11 | 1,418,450   | A | G | 0.7646 | 0.0045  | 0.0012 | 2.89E-04 |
| rs34423561  | 11 | 1,552,276   | A | G | 0.0090 | 0.0328  | 0.0057 | 7.21E-09 |
| rs117520198 | 11 | 2,212,843   | A | G | 0.1911 | 0.0107  | 0.0013 | 1.01E-15 |
| rs10743083  | 11 | 8,636,350   | A | G | 0.1775 | 0.0082  | 0.0014 | 3.26E-09 |
| rs4405299   | 11 | 11,258,197  | T | C | 0.4669 | 0.0066  | 0.0010 | 3.37E-10 |
| rs10831656  | 11 | 11,660,815  | T | C | 0.3106 | 0.0079  | 0.0011 | 2.90E-12 |
| rs1866710   | 11 | 12,875,312  | A | G | 0.2828 | -0.0145 | 0.0012 | 1.07E-35 |
| rs4757143   | 11 | 13,329,139  | T | C | 0.8659 | 0.0078  | 0.0015 | 3.93E-07 |
| rs72869952  | 11 | 16,311,761  | A | G | 0.8265 | 0.0067  | 0.0014 | 1.36E-06 |
| rs10832667  | 11 | 16,683,176  | T | C | 0.2097 | -0.0068 | 0.0013 | 1.48E-07 |
| rs2355468   | 11 | 17,668,754  | A | C | 0.6124 | -0.0068 | 0.0012 | 9.70E-09 |
| rs2283250   | 11 | 17,820,177  | A | G | 0.4843 | -0.0078 | 0.0010 | 1.13E-13 |
| rs11025422  | 11 | 20,200,744  | A | G | 0.5291 | -0.0051 | 0.0010 | 1.33E-06 |
| rs2293241   | 11 | 20,949,115  | T | C | 0.7120 | 0.0074  | 0.0012 | 1.50E-10 |
| rs12225836  | 11 | 21,922,163  | C | G | 0.7459 | 0.0055  | 0.0012 | 5.05E-06 |

|             |    |            |   |   |        |         |        |          |
|-------------|----|------------|---|---|--------|---------|--------|----------|
| rs2290046   | 11 | 22,384,166 | A | G | 0.1184 | -0.0067 | 0.0016 | 3.79E-05 |
| rs11027948  | 11 | 24,511,844 | A | C | 0.3814 | 0.0053  | 0.0011 | 1.04E-06 |
| rs11028323  | 11 | 25,009,896 | A | C | 0.5149 | -0.0098 | 0.0010 | 6.20E-21 |
| rs10835211  | 11 | 27,701,365 | A | G | 0.2460 | -0.0122 | 0.0012 | 7.76E-24 |
| rs10835389  | 11 | 28,676,505 | T | C | 0.6491 | -0.0095 | 0.0011 | 4.03E-18 |
| rs78813058  | 11 | 29,054,087 | A | C | 0.0874 | -0.0169 | 0.0019 | 7.41E-20 |
| rs322627    | 11 | 29,731,571 | C | G | 0.3777 | -0.0100 | 0.0011 | 1.96E-20 |
| rs117407988 | 11 | 30,438,344 | A | G | 0.0309 | 0.0174  | 0.0030 | 8.50E-09 |
| rs586875    | 11 | 30,755,937 | A | G | 0.4245 | 0.0080  | 0.0011 | 2.96E-14 |
| rs1402954   | 11 | 33,777,334 | T | C | 0.0966 | 0.0146  | 0.0018 | 1.71E-16 |
| rs10742344  | 11 | 35,428,126 | A | G | 0.3986 | 0.0048  | 0.0011 | 6.06E-06 |
| rs1481294   | 11 | 38,604,075 | A | G | 0.4531 | -0.0068 | 0.0011 | 7.87E-11 |
| rs7109373   | 11 | 39,928,045 | A | T | 0.8040 | 0.0104  | 0.0013 | 2.90E-15 |
| rs76708186  | 11 | 40,157,917 | T | C | 0.0737 | 0.0091  | 0.0020 | 5.99E-06 |
| rs10768668  | 11 | 41,165,371 | A | G | 0.1805 | -0.0094 | 0.0014 | 5.32E-12 |
| rs74969066  | 11 | 43,264,801 | T | C | 0.0700 | 0.0124  | 0.0021 | 1.46E-09 |
| rs11601363  | 11 | 43,589,812 | A | G | 0.4654 | 0.0061  | 0.0010 | 4.99E-09 |
| rs1023955   | 11 | 43,608,835 | T | G | 0.3992 | -0.0058 | 0.0011 | 5.78E-08 |
| rs80171383  | 11 | 46,084,677 | A | G | 0.1355 | 0.0146  | 0.0015 | 1.18E-21 |
| rs112026260 | 11 | 46,101,304 | T | C | 0.0530 | 0.0148  | 0.0023 | 2.72E-10 |
| rs12363232  | 11 | 47,623,890 | T | C | 0.3503 | 0.0057  | 0.0011 | 2.25E-07 |
| rs527528    | 11 | 57,433,327 | T | C | 0.3292 | -0.0093 | 0.0011 | 5.99E-17 |
| rs117933564 | 11 | 57,453,231 | A | G | 0.0290 | -0.0139 | 0.0032 | 1.12E-05 |
| rs77128898  | 11 | 61,313,525 | T | C | 0.0334 | -0.0242 | 0.0029 | 2.09E-16 |
| rs592931    | 11 | 61,496,751 | T | C | 0.3607 | 0.0088  | 0.0011 | 6.42E-16 |
| rs78278641  | 11 | 62,413,662 | T | C | 0.1373 | 0.0122  | 0.0015 | 1.19E-15 |
| rs147417731 | 11 | 62,435,507 | T | C | 0.9846 | -0.0264 | 0.0043 | 9.16E-10 |
| rs2845887   | 11 | 63,867,523 | T | C | 0.3473 | 0.0060  | 0.0011 | 5.36E-08 |
| rs658938    | 11 | 65,651,830 | A | G | 0.1940 | -0.0124 | 0.0013 | 1.00E-20 |
| rs186234792 | 11 | 65,796,752 | A | G | 0.9715 | 0.0150  | 0.0032 | 2.13E-06 |
| rs76878669  | 11 | 66,092,567 | C | G | 0.7581 | 0.0121  | 0.0012 | 6.48E-23 |
| rs3825021   | 11 | 67,434,936 | T | C | 0.4931 | -0.0061 | 0.0011 | 7.75E-09 |
| rs541243995 | 11 | 68,183,145 | A | G | 0.5628 | 0.0080  | 0.0012 | 6.20E-11 |
| rs73516862  | 11 | 68,245,648 | T | C | 0.7296 | 0.0101  | 0.0012 | 1.28E-17 |
| rs114109036 | 11 | 68,902,740 | T | C | 0.0342 | 0.0121  | 0.0029 | 2.72E-05 |
| rs61887439  | 11 | 70,249,399 | A | G | 0.1302 | -0.0063 | 0.0016 | 5.33E-05 |
| rs895204    | 11 | 70,662,057 | A | G | 0.1330 | -0.0123 | 0.0015 | 1.19E-15 |
| rs458437    | 11 | 72,359,204 | T | G | 0.6764 | 0.0129  | 0.0011 | 1.46E-30 |
| rs11601122  | 11 | 72,362,718 | A | G | 0.8416 | 0.0164  | 0.0014 | 1.81E-30 |
| rs150470230 | 11 | 73,466,863 | A | G | 0.9723 | 0.0214  | 0.0032 | 3.33E-11 |
| rs56294280  | 11 | 76,238,914 | A | G | 0.3212 | -0.0083 | 0.0011 | 1.28E-13 |
| rs1440980   | 11 | 76,495,076 | T | C | 0.2287 | 0.0141  | 0.0012 | 9.25E-30 |
| rs1670459   | 11 | 76,998,753 | C | G | 0.6083 | -0.0080 | 0.0011 | 6.55E-14 |
| rs477723    | 11 | 78,554,599 | T | C | 0.3745 | 0.0078  | 0.0011 | 7.12E-13 |
| rs112209391 | 11 | 79,151,784 | T | C | 0.1044 | 0.0139  | 0.0017 | 4.34E-16 |
| rs10899644  | 11 | 79,233,931 | C | G | 0.1736 | 0.0088  | 0.0014 | 1.68E-10 |
| rs10792468  | 11 | 79,898,818 | T | C | 0.3373 | -0.0078 | 0.0011 | 1.45E-12 |
| rs1880692   | 11 | 80,338,069 | A | G | 0.5376 | 0.0077  | 0.0010 | 2.78E-13 |

|            |    |             |   |   |        |         |        |          |
|------------|----|-------------|---|---|--------|---------|--------|----------|
| rs11232556 | 11 | 80,942,684  | A | G | 0.6073 | 0.0059  | 0.0011 | 3.03E-08 |
| rs59426273 | 11 | 82,784,316  | T | C | 0.1588 | -0.0073 | 0.0014 | 2.87E-07 |
| rs61899030 | 11 | 84,373,496  | T | G | 0.6732 | 0.0061  | 0.0011 | 5.13E-08 |
| rs11234234 | 11 | 84,613,381  | A | T | 0.5252 | 0.0060  | 0.0010 | 8.45E-09 |
| rs561655   | 11 | 85,800,279  | A | G | 0.6553 | -0.0089 | 0.0011 | 5.69E-16 |
| rs1472422  | 11 | 85,944,681  | T | G | 0.2625 | 0.0066  | 0.0012 | 3.19E-08 |
| rs17149318 | 11 | 86,416,819  | T | G | 0.8309 | -0.0057 | 0.0014 | 3.97E-05 |
| rs11822787 | 11 | 87,905,860  | T | C | 0.4435 | -0.0076 | 0.0011 | 6.59E-13 |
| rs645327   | 11 | 88,588,786  | T | C | 0.6717 | -0.0072 | 0.0011 | 1.03E-10 |
| rs511468   | 11 | 90,056,654  | T | C | 0.5013 | -0.0081 | 0.0010 | 9.10E-15 |
| rs7127256  | 11 | 90,525,490  | A | G | 0.4132 | -0.0081 | 0.0011 | 3.35E-14 |
| rs11608221 | 11 | 91,876,900  | C | G | 0.5328 | 0.0080  | 0.0010 | 1.65E-14 |
| rs526296   | 11 | 92,328,229  | T | C | 0.1480 | 0.0081  | 0.0015 | 4.74E-08 |
| rs11020370 | 11 | 93,204,641  | T | C | 0.8226 | -0.0080 | 0.0014 | 5.57E-09 |
| rs7126188  | 11 | 93,277,266  | T | C | 0.5670 | 0.0056  | 0.0011 | 1.07E-07 |
| rs964039   | 11 | 94,774,311  | T | C | 0.7203 | 0.0065  | 0.0012 | 3.47E-08 |
| rs10765775 | 11 | 95,656,362  | A | G | 0.3878 | 0.0159  | 0.0022 | 1.70E-13 |
| rs10765789 | 11 | 95,839,543  | A | G | 0.3827 | 0.0108  | 0.0011 | 1.35E-23 |
| rs56178002 | 11 | 96,060,832  | T | C | 0.5550 | 0.0052  | 0.0011 | 8.32E-07 |
| rs2919030  | 11 | 96,616,865  | T | G | 0.3534 | 0.0053  | 0.0011 | 1.41E-06 |
| rs4753925  | 11 | 98,771,391  | T | C | 0.7142 | 0.0074  | 0.0012 | 1.73E-10 |
| rs2155563  | 11 | 98,981,485  | A | T | 0.5823 | 0.0088  | 0.0011 | 1.13E-16 |
| rs2089171  | 11 | 99,284,506  | A | G | 0.6341 | -0.0068 | 0.0011 | 3.97E-10 |
| rs1219062  | 11 | 99,621,717  | T | C | 0.3197 | -0.0075 | 0.0011 | 2.06E-11 |
| rs10501955 | 11 | 100,081,589 | C | G | 0.6115 | 0.0048  | 0.0011 | 6.44E-06 |
| rs12798282 | 11 | 101,418,257 | T | G | 0.8728 | -0.0090 | 0.0016 | 1.04E-08 |
| rs10895719 | 11 | 104,563,483 | T | C | 0.7871 | -0.0107 | 0.0013 | 6.65E-17 |
| rs11226856 | 11 | 105,699,048 | A | G | 0.6314 | -0.0077 | 0.0011 | 1.13E-12 |
| rs1939800  | 11 | 105,814,770 | T | C | 0.3833 | 0.0083  | 0.0011 | 1.51E-14 |
| rs1388168  | 11 | 107,137,917 | A | G | 0.5022 | -0.0067 | 0.0010 | 1.77E-10 |
| rs10890995 | 11 | 109,327,622 | A | G | 0.2999 | -0.0092 | 0.0011 | 7.77E-16 |
| rs226119   | 11 | 110,661,902 | T | C | 0.5616 | 0.0053  | 0.0011 | 4.46E-07 |
| rs17536059 | 11 | 110,957,335 | C | G | 0.1730 | -0.0077 | 0.0014 | 2.33E-08 |
| rs61899382 | 11 | 111,516,360 | T | C | 0.1146 | -0.0008 | 0.0016 | 6.18E-01 |
| rs17565975 | 11 | 111,586,950 | A | G | 0.5529 | -0.0121 | 0.0011 | 1.25E-30 |
| rs59867819 | 11 | 112,833,246 | T | G | 0.1171 | -0.0101 | 0.0016 | 5.88E-10 |
| rs7125588  | 11 | 113,436,072 | A | G | 0.5656 | -0.0100 | 0.0011 | 4.12E-21 |
| rs12280220 | 11 | 113,469,219 | T | C | 0.7198 | 0.0093  | 0.0012 | 1.59E-15 |
| rs648044   | 11 | 114,030,799 | A | G | 0.3825 | 0.0061  | 0.0011 | 2.02E-08 |
| rs12807135 | 11 | 115,053,508 | C | G | 0.5126 | -0.0105 | 0.0010 | 9.36E-24 |
| rs7102093  | 11 | 115,455,085 | A | G | 0.2749 | 0.0060  | 0.0012 | 2.99E-07 |
| rs2512569  | 11 | 115,725,072 | T | C | 0.5327 | 0.0056  | 0.0010 | 8.40E-08 |
| rs1145178  | 11 | 115,791,534 | A | T | 0.4285 | 0.0059  | 0.0011 | 2.35E-08 |
| rs7121640  | 11 | 116,155,104 | C | G | 0.4199 | 0.0080  | 0.0011 | 4.98E-14 |
| rs7123652  | 11 | 117,377,518 | T | C | 0.7670 | -0.0073 | 0.0012 | 3.22E-09 |
| rs12225399 | 11 | 118,480,285 | C | G | 0.3500 | -0.0065 | 0.0011 | 2.71E-09 |
| rs11217548 | 11 | 119,742,803 | T | C | 0.0626 | 0.0104  | 0.0022 | 1.48E-06 |
| rs12806740 | 11 | 120,203,628 | A | G | 0.3821 | -0.0088 | 0.0011 | 4.40E-16 |

|             |    |             |   |   |        |         |        |          |
|-------------|----|-------------|---|---|--------|---------|--------|----------|
| rs4297478   | 11 | 120,435,854 | T | C | 0.5509 | -0.0092 | 0.0011 | 1.91E-18 |
| rs627532    | 11 | 120,826,131 | T | C | 0.6230 | 0.0055  | 0.0011 | 2.74E-07 |
| rs78655387  | 11 | 121,343,435 | T | C | 0.0271 | -0.0239 | 0.0033 | 3.36E-13 |
| rs144916412 | 11 | 121,449,806 | A | G | 0.0175 | -0.0178 | 0.0040 | 8.65E-06 |
| rs61905478  | 11 | 121,809,018 | A | G | 0.7297 | -0.0090 | 0.0012 | 3.22E-14 |
| rs596160    | 11 | 121,982,707 | A | G | 0.4223 | -0.0102 | 0.0011 | 7.94E-22 |
| rs4127499   | 11 | 122,176,383 | A | G | 0.3450 | 0.0110  | 0.0011 | 2.90E-23 |
| rs12421055  | 11 | 122,528,352 | A | C | 0.7530 | 0.0041  | 0.0012 | 6.57E-04 |
| rs1981408   | 11 | 122,638,643 | T | C | 0.5159 | 0.0054  | 0.0010 | 2.54E-07 |
| rs1029278   | 11 | 123,421,402 | A | G | 0.3330 | 0.0063  | 0.0011 | 1.71E-08 |
| rs752806    | 11 | 126,293,239 | A | T | 0.4710 | -0.0074 | 0.0011 | 1.69E-12 |
| rs117256336 | 11 | 126,607,115 | A | G | 0.0670 | -0.0108 | 0.0021 | 3.28E-07 |
| rs1793656   | 11 | 126,778,513 | A | G | 0.1872 | 0.0061  | 0.0013 | 5.03E-06 |
| rs7124673   | 11 | 127,257,366 | A | G | 0.4235 | -0.0040 | 0.0011 | 1.42E-04 |
| rs12272462  | 11 | 128,526,406 | A | G | 0.7325 | 0.0075  | 0.0012 | 2.53E-10 |
| rs1650820   | 11 | 129,762,407 | A | G | 0.7074 | 0.0068  | 0.0012 | 2.78E-09 |
| rs1655496   | 11 | 130,905,452 | A | G | 0.6394 | -0.0053 | 0.0011 | 1.24E-06 |
| rs12574281  | 11 | 131,205,421 | A | C | 0.6334 | -0.0072 | 0.0011 | 4.52E-11 |
| rs1448355   | 11 | 131,286,685 | T | C | 0.6238 | 0.0085  | 0.0011 | 3.35E-15 |
| rs371425    | 11 | 131,408,517 | T | G | 0.2086 | -0.0086 | 0.0013 | 3.13E-11 |
| rs529006    | 11 | 131,791,792 | A | G | 0.4480 | 0.0051  | 0.0011 | 1.18E-06 |
| rs1620329   | 11 | 132,577,443 | A | G | 0.5378 | 0.0049  | 0.0011 | 3.32E-06 |
| rs4936175   | 11 | 132,641,959 | T | C | 0.5615 | 0.0083  | 0.0011 | 4.87E-15 |
| rs1506876   | 11 | 132,717,613 | T | C | 0.5542 | -0.0044 | 0.0011 | 2.60E-05 |
| rs1941213   | 11 | 133,125,329 | A | C | 0.7280 | -0.0059 | 0.0012 | 4.39E-07 |
| rs10791303  | 11 | 133,531,999 | T | C | 0.6202 | 0.0088  | 0.0011 | 4.60E-16 |
| rs329645    | 11 | 133,813,168 | T | C | 0.7240 | 0.0051  | 0.0012 | 1.23E-05 |
| rs12273435  | 11 | 133,825,855 | A | G | 0.2010 | -0.0141 | 0.0013 | 6.11E-27 |
| rs10894784  | 11 | 134,061,599 | A | G | 0.6756 | 0.0074  | 0.0011 | 4.59E-11 |
| rs7951841   | 11 | 134,539,911 | T | C | 0.1442 | 0.0111  | 0.0015 | 1.18E-13 |
| rs11614957  | 12 | 195,309     | A | G | 0.4423 | 0.0121  | 0.0011 | 2.82E-30 |
| rs11571404  | 12 | 1,041,450   | T | C | 0.1971 | 0.0088  | 0.0013 | 3.27E-11 |
| rs2108641   | 12 | 1,973,329   | T | C | 0.1300 | 0.0123  | 0.0016 | 2.64E-15 |
| rs115124024 | 12 | 2,365,908   | A | C | 0.9505 | 0.0178  | 0.0024 | 1.47E-13 |
| rs4765720   | 12 | 3,308,296   | C | G | 0.7641 | -0.0055 | 0.0012 | 7.12E-06 |
| rs4766116   | 12 | 3,531,742   | A | G | 0.1817 | 0.0055  | 0.0014 | 5.89E-05 |
| rs115743600 | 12 | 4,042,500   | A | G | 0.0455 | -0.0127 | 0.0025 | 4.57E-07 |
| rs3217870   | 12 | 4,400,111   | T | C | 0.6188 | -0.0059 | 0.0011 | 6.00E-08 |
| rs12817050  | 12 | 6,032,138   | A | G | 0.4255 | 0.0049  | 0.0011 | 3.70E-06 |
| rs61159922  | 12 | 6,866,260   | A | G | 0.1035 | -0.0097 | 0.0017 | 1.94E-08 |
| rs61919240  | 12 | 8,831,954   | A | T | 0.3175 | 0.0061  | 0.0011 | 6.55E-08 |
| rs117424609 | 12 | 9,094,982   | A | G | 0.9615 | 0.0158  | 0.0027 | 8.12E-09 |
| rs2723827   | 12 | 11,929,481  | A | G | 0.1841 | -0.0077 | 0.0014 | 1.22E-08 |
| rs78631600  | 12 | 12,419,719  | T | G | 0.0783 | -0.0181 | 0.0019 | 1.64E-20 |
| rs34325     | 12 | 12,877,692  | T | C | 0.4693 | -0.0076 | 0.0010 | 3.27E-13 |
| rs10772644  | 12 | 13,417,617  | C | G | 0.8916 | 0.0140  | 0.0017 | 1.05E-16 |
| rs1479119   | 12 | 13,505,496  | A | G | 0.4380 | -0.0059 | 0.0011 | 2.79E-08 |
| rs12822453  | 12 | 13,694,821  | A | G | 0.1888 | 0.0060  | 0.0013 | 7.19E-06 |

|             |    |            |   |   |        |         |        |          |
|-------------|----|------------|---|---|--------|---------|--------|----------|
| rs220567    | 12 | 13,954,403 | C | G | 0.3927 | 0.0074  | 0.0011 | 4.54E-12 |
| rs1019385   | 12 | 14,134,843 | A | C | 0.4582 | -0.0067 | 0.0011 | 1.86E-10 |
| rs7304399   | 12 | 14,645,350 | A | G | 0.4606 | 0.0109  | 0.0010 | 2.16E-25 |
| rs7303854   | 12 | 15,359,241 | A | T | 0.3313 | -0.0101 | 0.0011 | 7.93E-20 |
| rs10846255  | 12 | 16,094,161 | A | G | 0.2311 | -0.0069 | 0.0012 | 3.31E-08 |
| rs2160514   | 12 | 16,756,508 | A | C | 0.5614 | -0.0111 | 0.0011 | 5.90E-26 |
| rs842463    | 12 | 17,095,055 | T | C | 0.3838 | -0.0071 | 0.0011 | 4.48E-11 |
| rs7314674   | 12 | 17,458,773 | A | C | 0.4061 | 0.0035  | 0.0011 | 1.17E-03 |
| rs12305290  | 12 | 18,399,464 | A | G | 0.1728 | -0.0087 | 0.0014 | 3.36E-10 |
| rs1490706   | 12 | 19,108,231 | T | C | 0.3543 | -0.0057 | 0.0011 | 1.82E-07 |
| rs111552936 | 12 | 19,439,238 | A | T | 0.9693 | 0.0156  | 0.0032 | 7.93E-07 |
| rs2046602   | 12 | 22,791,447 | A | C | 0.5352 | 0.0054  | 0.0011 | 2.36E-07 |
| rs958131    | 12 | 23,071,252 | A | G | 0.3941 | 0.0100  | 0.0011 | 7.55E-21 |
| rs4964068   | 12 | 23,304,932 | A | T | 0.5279 | -0.0062 | 0.0011 | 4.99E-09 |
| rs10770968  | 12 | 23,313,880 | T | G | 0.5093 | -0.0015 | 0.0010 | 1.48E-01 |
| rs7137535   | 12 | 23,945,031 | T | C | 0.8639 | -0.0112 | 0.0015 | 3.54E-13 |
| rs10842296  | 12 | 24,395,272 | T | C | 0.2448 | 0.0074  | 0.0012 | 1.45E-09 |
| rs12816214  | 12 | 24,866,863 | A | G | 0.0404 | -0.0150 | 0.0027 | 1.66E-08 |
| rs17470040  | 12 | 26,527,776 | T | G | 0.9033 | 0.0128  | 0.0018 | 5.77E-13 |
| rs11613431  | 12 | 26,684,343 | A | G | 0.2610 | -0.0088 | 0.0012 | 2.17E-13 |
| rs12828220  | 12 | 27,397,792 | T | C | 0.6333 | -0.0097 | 0.0011 | 2.79E-19 |
| rs7975536   | 12 | 31,781,247 | T | C | 0.1991 | 0.0102  | 0.0013 | 8.98E-15 |
| rs16919774  | 12 | 32,502,505 | A | T | 0.7873 | -0.0093 | 0.0013 | 2.67E-13 |
| rs116887621 | 12 | 39,643,967 | T | C | 0.0171 | 0.0173  | 0.0041 | 2.57E-05 |
| rs574918    | 12 | 40,357,647 | A | G | 0.1586 | -0.0064 | 0.0014 | 8.93E-06 |
| rs11181124  | 12 | 42,115,447 | T | C | 0.7868 | -0.0083 | 0.0013 | 1.06E-10 |
| rs2731034   | 12 | 45,422,236 | A | G | 0.5959 | 0.0060  | 0.0011 | 1.70E-08 |
| rs35125     | 12 | 46,274,858 | A | G | 0.5129 | -0.0072 | 0.0010 | 8.27E-12 |
| rs11534993  | 12 | 46,817,562 | T | C | 0.3733 | 0.0082  | 0.0011 | 3.79E-14 |
| rs547370614 | 12 | 46,840,639 | T | C | 0.9957 | 0.0323  | 0.0085 | 1.37E-04 |
| rs2293445   | 12 | 49,398,862 | A | G | 0.3840 | 0.0119  | 0.0011 | 3.23E-28 |
| rs1126930   | 12 | 49,399,132 | C | G | 0.0340 | -0.0158 | 0.0029 | 5.93E-08 |
| rs933738    | 12 | 49,943,122 | A | G | 0.8199 | -0.0124 | 0.0014 | 7.67E-20 |
| rs2280503   | 12 | 51,138,687 | A | C | 0.6670 | -0.0049 | 0.0011 | 8.87E-06 |
| rs7313065   | 12 | 53,471,218 | A | C | 0.1710 | -0.0096 | 0.0014 | 6.04E-12 |
| rs58905411  | 12 | 54,623,132 | A | G | 0.3940 | 0.0100  | 0.0011 | 1.27E-20 |
| rs75073462  | 12 | 55,160,397 | A | C | 0.1696 | 0.0060  | 0.0014 | 1.75E-05 |
| rs11611029  | 12 | 56,385,579 | T | C | 0.4460 | -0.0147 | 0.0011 | 4.98E-44 |
| rs1689510   | 12 | 56,396,768 | C | G | 0.3272 | 0.0174  | 0.0011 | 3.98E-55 |
| rs1800139   | 12 | 57,585,144 | T | C | 0.6823 | 0.0082  | 0.0012 | 1.67E-11 |
| rs11172371  | 12 | 58,286,188 | T | C | 0.3227 | -0.0107 | 0.0011 | 1.23E-21 |
| rs12425533  | 12 | 59,367,493 | A | G | 0.7542 | -0.0075 | 0.0012 | 7.40E-10 |
| rs7315745   | 12 | 59,850,788 | A | G | 0.5973 | 0.0065  | 0.0011 | 1.47E-09 |
| rs61923341  | 12 | 60,846,830 | A | G | 0.8276 | -0.0114 | 0.0014 | 1.80E-16 |
| rs7975065   | 12 | 62,680,603 | A | G | 0.3058 | 0.0080  | 0.0011 | 2.63E-12 |
| rs1081781   | 12 | 63,347,818 | A | G | 0.6952 | -0.0049 | 0.0011 | 1.96E-05 |
| rs7131691   | 12 | 64,540,960 | A | G | 0.4705 | -0.0075 | 0.0011 | 1.09E-12 |
| rs7302284   | 12 | 67,368,127 | A | C | 0.6151 | 0.0057  | 0.0011 | 1.33E-07 |

|             |    |             |   |   |        |         |        |          |
|-------------|----|-------------|---|---|--------|---------|--------|----------|
| rs35079242  | 12 | 68,230,208  | T | G | 0.1320 | -0.0093 | 0.0015 | 1.70E-09 |
| rs2090324   | 12 | 73,563,917  | T | C | 0.3325 | -0.0045 | 0.0011 | 5.17E-05 |
| rs11179772  | 12 | 74,140,098  | T | C | 0.5829 | -0.0073 | 0.0011 | 5.14E-12 |
| rs77701788  | 12 | 74,937,141  | A | G | 0.8788 | -0.0107 | 0.0016 | 2.05E-11 |
| rs9888376   | 12 | 77,644,553  | T | C | 0.5713 | -0.0059 | 0.0011 | 2.63E-08 |
| rs6539284   | 12 | 79,592,680  | T | C | 0.5931 | -0.0072 | 0.0011 | 1.38E-11 |
| rs10862376  | 12 | 82,257,633  | A | T | 0.1473 | 0.0134  | 0.0015 | 8.89E-20 |
| rs1517825   | 12 | 83,557,444  | C | G | 0.4746 | -0.0045 | 0.0011 | 1.53E-05 |
| rs717997    | 12 | 84,133,974  | A | G | 0.4176 | 0.0130  | 0.0011 | 2.49E-34 |
| rs111788495 | 12 | 87,473,626  | T | G | 0.0333 | -0.0227 | 0.0034 | 1.80E-11 |
| rs73197422  | 12 | 88,045,706  | A | G | 0.9276 | -0.0129 | 0.0020 | 1.64E-10 |
| rs2279574   | 12 | 89,745,477  | A | C | 0.5354 | 0.0106  | 0.0010 | 8.53E-24 |
| rs2520511   | 12 | 91,005,153  | T | C | 0.6655 | -0.0062 | 0.0011 | 2.63E-08 |
| rs7967550   | 12 | 92,145,307  | A | G | 0.3946 | -0.0057 | 0.0011 | 8.96E-08 |
| rs1434714   | 12 | 94,432,101  | T | C | 0.7575 | 0.0075  | 0.0012 | 9.79E-10 |
| rs7296742   | 12 | 95,147,249  | A | G | 0.2849 | -0.0086 | 0.0012 | 2.06E-13 |
| rs78345136  | 12 | 97,581,344  | T | C | 0.9305 | -0.0112 | 0.0021 | 4.90E-08 |
| rs2216144   | 12 | 97,666,478  | T | C | 0.5306 | 0.0073  | 0.0010 | 3.70E-12 |
| rs12320913  | 12 | 97,722,202  | A | C | 0.2720 | 0.0060  | 0.0012 | 4.05E-07 |
| rs10860215  | 12 | 97,863,578  | T | C | 0.1340 | -0.0091 | 0.0015 | 3.04E-09 |
| rs10860219  | 12 | 97,959,792  | A | G | 0.8352 | 0.0086  | 0.0014 | 1.14E-09 |
| rs10467002  | 12 | 98,574,502  | T | G | 0.3184 | 0.0056  | 0.0011 | 6.45E-07 |
| rs7955363   | 12 | 98,993,356  | C | G | 0.0900 | -0.0096 | 0.0018 | 1.58E-07 |
| rs12314891  | 12 | 99,578,434  | A | G | 0.7338 | -0.0081 | 0.0012 | 6.04E-12 |
| rs61940318  | 12 | 100,263,190 | A | G | 0.1974 | -0.0083 | 0.0013 | 2.18E-10 |
| rs1514802   | 12 | 101,137,570 | A | G | 0.7553 | -0.0058 | 0.0012 | 1.65E-06 |
| rs112650421 | 12 | 101,399,617 | T | G | 0.0236 | -0.0206 | 0.0035 | 2.72E-09 |
| rs7397905   | 12 | 101,537,184 | A | G | 0.8347 | 0.0099  | 0.0014 | 2.30E-12 |
| rs11111443  | 12 | 103,495,380 | A | G | 0.6334 | 0.0072  | 0.0011 | 2.81E-11 |
| rs7313632   | 12 | 104,991,564 | A | G | 0.6451 | 0.0053  | 0.0011 | 1.13E-06 |
| rs4356312   | 12 | 105,450,773 | T | C | 0.1784 | -0.0079 | 0.0014 | 7.00E-09 |
| rs10778466  | 12 | 106,788,013 | T | C | 0.7675 | 0.0117  | 0.0012 | 3.90E-21 |
| rs116075459 | 12 | 106,807,888 | A | C | 0.7818 | 0.0124  | 0.0015 | 1.94E-17 |
| rs2098432   | 12 | 107,677,693 | A | G | 0.3665 | -0.0088 | 0.0011 | 7.49E-16 |
| rs4964731   | 12 | 109,057,809 | A | C | 0.4815 | -0.0071 | 0.0010 | 1.37E-11 |
| rs918106    | 12 | 109,904,318 | T | C | 0.5376 | -0.0078 | 0.0010 | 1.27E-13 |
| rs7977614   | 12 | 110,115,286 | A | G | 0.7172 | -0.0112 | 0.0012 | 2.53E-21 |
| rs6490044   | 12 | 116,383,865 | T | G | 0.9170 | 0.0108  | 0.0019 | 1.27E-08 |
| rs61937390  | 12 | 116,727,586 | T | C | 0.0927 | -0.0100 | 0.0018 | 2.62E-08 |
| rs79644799  | 12 | 117,525,789 | T | G | 0.1495 | 0.0114  | 0.0015 | 1.11E-14 |
| rs1045542   | 12 | 118,855,432 | A | G | 0.0940 | 0.0089  | 0.0018 | 7.73E-07 |
| rs12313886  | 12 | 119,349,630 | T | C | 0.2410 | 0.0067  | 0.0012 | 3.88E-08 |
| rs4238064   | 12 | 119,815,811 | A | T | 0.7280 | -0.0053 | 0.0012 | 7.03E-06 |
| rs574967    | 12 | 120,227,740 | A | G | 0.3273 | 0.0076  | 0.0011 | 1.12E-11 |
| rs149308817 | 12 | 121,029,332 | A | G | 0.0554 | -0.0032 | 0.0023 | 1.65E-01 |
| rs542189    | 12 | 121,032,542 | T | G | 0.2302 | 0.0080  | 0.0012 | 1.45E-10 |
| rs2859263   | 12 | 121,072,799 | T | C | 0.5619 | -0.0085 | 0.0011 | 7.99E-16 |
| rs660549    | 12 | 121,300,988 | T | C | 0.5742 | -0.0104 | 0.0011 | 8.99E-23 |

|             |    |             |   |   |        |         |        |          |
|-------------|----|-------------|---|---|--------|---------|--------|----------|
| rs34933970  | 12 | 122,172,424 | A | C | 0.4769 | -0.0088 | 0.0010 | 5.36E-17 |
| rs77538769  | 12 | 122,187,824 | A | C | 0.9516 | 0.0195  | 0.0028 | 4.58E-12 |
| rs143838180 | 12 | 122,216,221 | A | G | 0.0428 | -0.0194 | 0.0026 | 6.42E-14 |
| rs6489071   | 12 | 123,025,576 | C | G | 0.2693 | -0.0115 | 0.0012 | 1.81E-22 |
| rs7306755   | 12 | 123,767,929 | A | G | 0.2045 | 0.0190  | 0.0013 | 2.51E-48 |
| rs34086857  | 12 | 125,056,100 | A | C | 0.8577 | -0.0076 | 0.0015 | 4.50E-07 |
| rs12426133  | 12 | 125,116,400 | A | G | 0.2122 | -0.0033 | 0.0013 | 9.26E-03 |
| rs11060630  | 12 | 130,458,508 | T | C | 0.2699 | 0.0063  | 0.0012 | 1.11E-07 |
| rs10744457  | 12 | 130,745,841 | A | C | 0.2933 | 0.0089  | 0.0012 | 1.28E-14 |
| rs2632667   | 12 | 131,271,293 | A | G | 0.5062 | -0.0062 | 0.0010 | 3.84E-09 |
| rs1107871   | 12 | 132,240,659 | A | G | 0.5520 | -0.0086 | 0.0011 | 4.29E-16 |
| rs4883624   | 12 | 133,212,737 | T | C | 0.4473 | -0.0069 | 0.0011 | 5.98E-11 |
| rs11147235  | 12 | 133,688,707 | T | C | 0.8155 | -0.0073 | 0.0014 | 7.84E-08 |
| rs7983020   | 13 | 21,239,941  | T | C | 0.7151 | -0.0089 | 0.0012 | 1.34E-14 |
| rs73446806  | 13 | 28,123,179  | T | C | 0.1626 | 0.0075  | 0.0014 | 1.08E-07 |
| rs610545    | 13 | 30,531,401  | A | G | 0.9099 | 0.0089  | 0.0018 | 1.10E-06 |
| rs9551887   | 13 | 30,884,268  | T | C | 0.5490 | -0.0080 | 0.0011 | 2.88E-14 |
| rs9315108   | 13 | 31,645,518  | T | C | 0.5508 | 0.0081  | 0.0011 | 1.37E-14 |
| rs4943290   | 13 | 31,836,367  | T | G | 0.2998 | -0.0080 | 0.0011 | 3.16E-12 |
| rs9543390   | 13 | 31,852,385  | T | C | 0.7834 | -0.0124 | 0.0013 | 1.43E-22 |
| rs1207953   | 13 | 32,977,532  | C | G | 0.6190 | -0.0080 | 0.0011 | 1.64E-13 |
| rs772646    | 13 | 33,026,356  | A | G | 0.3587 | 0.0075  | 0.0011 | 5.90E-12 |
| rs2202780   | 13 | 35,295,773  | A | G | 0.7416 | -0.0074 | 0.0012 | 7.72E-10 |
| rs9545395   | 13 | 36,370,970  | T | C | 0.8663 | 0.0101  | 0.0015 | 5.69E-11 |
| rs9576167   | 13 | 37,649,395  | T | C | 0.5802 | 0.0061  | 0.0011 | 1.10E-08 |
| rs17257579  | 13 | 38,176,607  | T | C | 0.8755 | -0.0131 | 0.0016 | 1.40E-16 |
| rs7997862   | 13 | 42,571,136  | A | G | 0.5587 | 0.0081  | 0.0011 | 1.15E-14 |
| rs238257    | 13 | 42,924,883  | C | G | 0.4816 | 0.0075  | 0.0010 | 1.04E-12 |
| rs61951891  | 13 | 43,891,881  | T | C | 0.3318 | 0.0056  | 0.0011 | 5.35E-07 |
| rs9595290   | 13 | 45,879,770  | A | C | 0.9301 | 0.0084  | 0.0021 | 5.25E-05 |
| rs1469595   | 13 | 47,640,886  | A | C | 0.4884 | 0.0079  | 0.0010 | 5.20E-14 |
| rs558003    | 13 | 51,172,963  | A | G | 0.0965 | 0.0095  | 0.0018 | 7.90E-08 |
| rs9526753   | 13 | 51,956,122  | T | C | 0.3907 | -0.0054 | 0.0011 | 5.37E-07 |
| rs6561699   | 13 | 53,557,757  | T | C | 0.3125 | 0.0075  | 0.0011 | 2.93E-11 |
| rs1891942   | 13 | 53,673,897  | T | C | 0.4004 | -0.0067 | 0.0011 | 3.14E-10 |
| rs77187837  | 13 | 54,086,522  | T | C | 0.1223 | 0.0129  | 0.0016 | 5.83E-16 |
| rs9316676   | 13 | 54,477,629  | A | G | 0.7341 | -0.0094 | 0.0012 | 2.90E-15 |
| rs2873233   | 13 | 55,814,397  | T | C | 0.6493 | -0.0088 | 0.0011 | 9.60E-16 |
| rs9537509   | 13 | 57,509,685  | T | C | 0.7447 | -0.0070 | 0.0012 | 5.32E-09 |
| rs1334297   | 13 | 58,335,375  | A | G | 0.7407 | 0.0240  | 0.0012 | 8.08E-90 |
| rs1856810   | 13 | 59,565,064  | T | C | 0.4175 | -0.0079 | 0.0011 | 8.27E-14 |
| rs59483928  | 13 | 59,837,062  | T | G | 0.6642 | 0.0061  | 0.0011 | 4.23E-08 |
| rs9538524   | 13 | 60,369,746  | T | C | 0.2523 | 0.0112  | 0.0012 | 1.54E-20 |
| rs7997690   | 13 | 60,779,722  | T | C | 0.6331 | 0.0090  | 0.0011 | 1.28E-16 |
| rs7986933   | 13 | 60,970,021  | A | C | 0.1944 | 0.0078  | 0.0013 | 4.53E-09 |
| rs9317202   | 13 | 62,355,464  | T | C | 0.7027 | 0.0098  | 0.0011 | 1.27E-17 |
| rs269632    | 13 | 64,618,043  | T | C | 0.4003 | -0.0071 | 0.0011 | 2.30E-11 |
| rs73197928  | 13 | 66,399,353  | A | G | 0.9900 | 0.0241  | 0.0054 | 8.86E-06 |

|             |    |             |   |   |        |         |        |          |
|-------------|----|-------------|---|---|--------|---------|--------|----------|
| rs61957702  | 13 | 66,721,884  | C | G | 0.8211 | 0.0085  | 0.0014 | 4.25E-10 |
| rs9540731   | 13 | 66,949,370  | T | C | 0.5052 | 0.0107  | 0.0010 | 9.93E-25 |
| rs9317593   | 13 | 67,076,574  | A | G | 0.1478 | -0.0130 | 0.0015 | 9.22E-19 |
| rs9317615   | 13 | 67,378,152  | T | C | 0.5744 | 0.0058  | 0.0011 | 3.73E-08 |
| rs9541123   | 13 | 68,047,452  | T | C | 0.6217 | -0.0077 | 0.0011 | 1.22E-12 |
| rs11842044  | 13 | 69,071,798  | A | C | 0.7698 | -0.0092 | 0.0012 | 1.80E-13 |
| rs2492553   | 13 | 69,466,320  | A | C | 0.5420 | 0.0101  | 0.0011 | 6.43E-22 |
| rs4884900   | 13 | 71,258,258  | C | G | 0.4241 | -0.0091 | 0.0011 | 1.27E-17 |
| rs17088142  | 13 | 71,948,305  | T | G | 0.4691 | -0.0068 | 0.0010 | 7.51E-11 |
| rs9530562   | 13 | 77,158,633  | T | G | 0.6453 | -0.0062 | 0.0011 | 1.13E-08 |
| rs348036    | 13 | 80,792,899  | T | G | 0.1936 | -0.0080 | 0.0013 | 2.05E-09 |
| rs7988627   | 13 | 81,631,782  | A | G | 0.5688 | -0.0077 | 0.0011 | 2.61E-13 |
| rs9574993   | 13 | 82,485,367  | T | C | 0.3631 | 0.0060  | 0.0011 | 4.34E-08 |
| rs7981839   | 13 | 84,061,991  | A | C | 0.8194 | 0.0083  | 0.0014 | 1.30E-09 |
| rs6563363   | 13 | 84,307,786  | T | G | 0.3732 | -0.0092 | 0.0011 | 1.70E-17 |
| rs9546554   | 13 | 84,558,285  | A | G | 0.7983 | 0.0081  | 0.0013 | 5.08E-10 |
| rs9565961   | 13 | 85,245,931  | T | C | 0.1569 | -0.0118 | 0.0014 | 1.95E-16 |
| rs11841508  | 13 | 88,683,971  | T | C | 0.3006 | 0.0070  | 0.0011 | 7.18E-10 |
| rs7319397   | 13 | 89,190,682  | A | G | 0.4840 | -0.0042 | 0.0010 | 5.82E-05 |
| rs7326484   | 13 | 89,733,492  | A | T | 0.2142 | 0.0077  | 0.0013 | 1.98E-09 |
| rs9560707   | 13 | 91,509,113  | A | T | 0.7000 | 0.0102  | 0.0011 | 5.69E-19 |
| rs75624576  | 13 | 91,973,215  | T | G | 0.1004 | 0.0154  | 0.0017 | 1.36E-18 |
| rs7320982   | 13 | 92,019,926  | T | C | 0.7684 | 0.0104  | 0.0012 | 6.90E-17 |
| rs1411753   | 13 | 92,891,784  | C | G | 0.3244 | -0.0069 | 0.0011 | 5.80E-10 |
| rs4528437   | 13 | 93,191,905  | T | C | 0.3241 | 0.0059  | 0.0011 | 1.33E-07 |
| rs2813619   | 13 | 94,105,544  | T | G | 0.1387 | 0.0091  | 0.0015 | 1.96E-09 |
| rs502029    | 13 | 94,804,243  | A | G | 0.3373 | -0.0054 | 0.0011 | 1.17E-06 |
| rs12429254  | 13 | 96,299,663  | T | C | 0.1104 | 0.0084  | 0.0017 | 5.33E-07 |
| rs2182066   | 13 | 96,970,876  | T | C | 0.9169 | -0.0137 | 0.0019 | 5.11E-13 |
| rs7316999   | 13 | 97,499,150  | A | G | 0.0620 | 0.0175  | 0.0022 | 8.57E-16 |
| rs76853788  | 13 | 97,794,660  | C | G | 0.0477 | -0.0136 | 0.0025 | 2.99E-08 |
| rs1973419   | 13 | 97,976,147  | T | C | 0.4903 | 0.0075  | 0.0010 | 7.51E-13 |
| rs9513416   | 13 | 99,055,774  | A | G | 0.8474 | -0.0111 | 0.0015 | 2.49E-14 |
| rs1969794   | 13 | 99,090,168  | T | G | 0.3299 | -0.0083 | 0.0012 | 1.54E-12 |
| rs12261     | 13 | 99,100,547  | T | C | 0.4193 | 0.0125  | 0.0011 | 5.10E-32 |
| rs3783006   | 13 | 99,111,209  | C | G | 0.4488 | 0.0131  | 0.0011 | 1.69E-35 |
| rs9513725   | 13 | 100,735,511 | A | G | 0.4098 | 0.0091  | 0.0011 | 1.72E-17 |
| rs1765749   | 13 | 101,378,195 | A | G | 0.2463 | -0.0079 | 0.0012 | 8.93E-11 |
| rs568012    | 13 | 101,983,857 | A | G | 0.4540 | 0.0043  | 0.0011 | 5.23E-05 |
| rs1537933   | 13 | 102,923,847 | A | G | 0.7138 | 0.0082  | 0.0012 | 1.89E-12 |
| rs117979136 | 13 | 105,780,736 | A | G | 0.0308 | 0.0195  | 0.0030 | 1.16E-10 |
| rs9558526   | 13 | 105,956,232 | A | C | 0.3010 | -0.0073 | 0.0011 | 2.06E-10 |
| rs72656488  | 13 | 107,139,203 | A | G | 0.1513 | -0.0076 | 0.0015 | 2.22E-07 |
| rs7327539   | 13 | 107,588,707 | A | G | 0.6910 | -0.0092 | 0.0011 | 5.95E-16 |
| rs78667595  | 13 | 109,706,967 | A | G | 0.0917 | -0.0125 | 0.0018 | 7.56E-12 |
| rs2182918   | 13 | 110,032,857 | T | G | 0.4911 | 0.0059  | 0.0010 | 1.34E-08 |
| rs9555651   | 13 | 110,587,023 | T | C | 0.1673 | 0.0111  | 0.0014 | 3.03E-15 |
| rs61969310  | 13 | 111,585,556 | T | G | 0.6253 | 0.0048  | 0.0011 | 1.13E-05 |



|             |    |             |   |   |        |         |        |          |
|-------------|----|-------------|---|---|--------|---------|--------|----------|
| rs1555752   | 13 | 111,976,581 | T | C | 0.5585 | 0.0056  | 0.0011 | 9.69E-08 |
| rs2316463   | 13 | 113,901,406 | T | C | 0.2325 | 0.0070  | 0.0012 | 1.89E-08 |
| rs10145520  | 14 | 21,930,932  | T | G | 0.8074 | -0.0126 | 0.0013 | 2.47E-21 |
| rs11157931  | 14 | 23,403,193  | A | C | 0.3923 | -0.0115 | 0.0011 | 5.98E-27 |
| rs2231301   | 14 | 23,777,099  | A | G | 0.2227 | -0.0070 | 0.0013 | 3.12E-08 |
| rs11623285  | 14 | 24,557,642  | T | G | 0.8654 | -0.0130 | 0.0015 | 3.97E-17 |
| rs2025258   | 14 | 24,654,489  | T | C | 0.6519 | 0.0067  | 0.0011 | 1.23E-09 |
| rs2223928   | 14 | 26,567,802  | T | C | 0.5490 | 0.0065  | 0.0011 | 6.19E-10 |
| rs8020023   | 14 | 26,981,079  | A | G | 0.2379 | 0.0145  | 0.0012 | 6.34E-32 |
| rs61983095  | 14 | 28,782,734  | T | G | 0.8006 | 0.0094  | 0.0013 | 7.81E-13 |
| rs144225846 | 14 | 29,632,841  | T | C | 0.9931 | 0.0425  | 0.0065 | 4.68E-11 |
| rs12897763  | 14 | 29,638,938  | A | G | 0.1911 | 0.0197  | 0.0013 | 1.73E-49 |
| rs72671456  | 14 | 29,662,737  | A | G | 0.1399 | -0.0179 | 0.0015 | 2.00E-32 |
| rs72673540  | 14 | 29,822,264  | T | C | 0.0957 | -0.0208 | 0.0018 | 5.66E-31 |
| rs1191570   | 14 | 29,958,256  | A | C | 0.3224 | 0.0050  | 0.0011 | 6.72E-06 |
| rs4981711   | 14 | 30,074,001  | T | C | 0.6167 | 0.0084  | 0.0011 | 7.80E-15 |
| rs7147473   | 14 | 30,608,538  | A | G | 0.6733 | -0.0095 | 0.0011 | 1.16E-17 |
| rs72662300  | 14 | 30,767,400  | T | G | 0.3327 | 0.0102  | 0.0011 | 3.63E-20 |
| rs10130738  | 14 | 30,831,113  | A | T | 0.8729 | -0.0074 | 0.0016 | 2.61E-06 |
| rs1951173   | 14 | 30,917,230  | T | C | 0.1567 | -0.0074 | 0.0014 | 3.20E-07 |
| rs11627900  | 14 | 33,100,829  | A | G | 0.7177 | -0.0068 | 0.0012 | 3.89E-09 |
| rs17522122  | 14 | 33,302,882  | T | G | 0.4767 | -0.0118 | 0.0010 | 2.24E-29 |
| rs11851667  | 14 | 33,588,830  | T | C | 0.7375 | -0.0076 | 0.0012 | 2.06E-10 |
| rs12586262  | 14 | 34,022,723  | T | C | 0.4191 | 0.0084  | 0.0011 | 1.86E-15 |
| rs3909616   | 14 | 36,896,963  | C | G | 0.5964 | -0.0059 | 0.0011 | 2.91E-08 |
| rs72676302  | 14 | 36,912,454  | T | C | 0.0452 | 0.0171  | 0.0025 | 1.32E-11 |
| rs9783655   | 14 | 39,349,775  | A | G | 0.8202 | 0.0078  | 0.0014 | 1.28E-08 |
| rs34074136  | 14 | 41,095,960  | T | C | 0.7765 | 0.0106  | 0.0013 | 4.25E-17 |
| rs72672601  | 14 | 42,671,683  | A | G | 0.5715 | -0.0095 | 0.0011 | 2.02E-19 |
| rs10130224  | 14 | 49,397,286  | A | C | 0.5873 | -0.0059 | 0.0011 | 2.40E-08 |
| rs8008323   | 14 | 49,952,834  | A | G | 0.8965 | 0.0102  | 0.0017 | 2.70E-09 |
| rs12893970  | 14 | 56,474,502  | A | G | 0.0983 | -0.0127 | 0.0018 | 4.76E-13 |
| rs241516    | 14 | 56,574,536  | T | C | 0.6408 | 0.0072  | 0.0011 | 3.72E-11 |
| rs1117310   | 14 | 56,686,732  | A | G | 0.4616 | 0.0074  | 0.0010 | 1.61E-12 |
| rs11622850  | 14 | 57,316,846  | A | G | 0.9255 | 0.0194  | 0.0020 | 2.08E-22 |
| rs75672140  | 14 | 57,336,842  | A | C | 0.0414 | 0.0193  | 0.0026 | 2.30E-13 |
| rs17092597  | 14 | 57,445,718  | A | G | 0.0506 | 0.0171  | 0.0024 | 9.93E-13 |
| rs12891191  | 14 | 58,100,283  | C | G | 0.5175 | 0.0064  | 0.0010 | 7.88E-10 |
| rs11158200  | 14 | 58,649,843  | A | G | 0.5367 | 0.0086  | 0.0011 | 2.53E-16 |
| rs177759    | 14 | 59,400,518  | T | G | 0.6865 | -0.0068 | 0.0011 | 2.08E-09 |
| rs8016349   | 14 | 60,798,366  | A | G | 0.9141 | -0.0082 | 0.0019 | 1.17E-05 |
| rs7493429   | 14 | 60,806,759  | A | C | 0.6847 | -0.0095 | 0.0011 | 3.50E-17 |
| rs968257    | 14 | 64,680,285  | T | C | 0.6411 | -0.0081 | 0.0011 | 1.09E-13 |
| rs61987038  | 14 | 65,054,252  | T | C | 0.7092 | -0.0100 | 0.0012 | 3.61E-18 |
| rs1147455   | 14 | 66,448,348  | A | G | 0.7074 | -0.0069 | 0.0012 | 2.36E-09 |
| rs72715340  | 14 | 67,543,822  | A | G | 0.9585 | 0.0168  | 0.0026 | 1.36E-10 |
| rs10130940  | 14 | 69,403,030  | A | C | 0.9359 | 0.0126  | 0.0021 | 4.05E-09 |
| rs7140680   | 14 | 69,450,505  | A | G | 0.4228 | -0.0099 | 0.0011 | 7.59E-21 |

|             |    |             |   |   |        |         |        |          |
|-------------|----|-------------|---|---|--------|---------|--------|----------|
| rs7150195   | 14 | 69,740,483  | T | G | 0.3758 | 0.0136  | 0.0011 | 1.44E-36 |
| rs36555     | 14 | 71,364,561  | T | C | 0.7047 | -0.0067 | 0.0011 | 6.04E-09 |
| rs987579    | 14 | 71,513,480  | T | C | 0.9026 | 0.0100  | 0.0018 | 1.31E-08 |
| rs1210365   | 14 | 72,301,958  | A | T | 0.6142 | 0.0080  | 0.0011 | 1.35E-13 |
| rs17104975  | 14 | 72,428,634  | A | G | 0.7451 | -0.0090 | 0.0012 | 9.03E-14 |
| rs56118783  | 14 | 72,602,595  | A | G | 0.0986 | -0.0101 | 0.0018 | 9.11E-09 |
| rs149662    | 14 | 72,639,496  | T | C | 0.1887 | 0.0101  | 0.0013 | 5.61E-14 |
| rs2240980   | 14 | 73,409,683  | C | G | 0.6954 | 0.0073  | 0.0011 | 1.70E-10 |
| rs7158218   | 14 | 73,934,880  | A | C | 0.7148 | -0.0081 | 0.0012 | 2.10E-12 |
| rs4903203   | 14 | 74,660,508  | A | G | 0.3269 | -0.0095 | 0.0011 | 1.98E-17 |
| rs730384    | 14 | 74,889,870  | A | G | 0.4364 | 0.0089  | 0.0011 | 4.22E-17 |
| rs140107039 | 14 | 75,299,461  | T | C | 0.0311 | -0.0208 | 0.0030 | 8.14E-12 |
| rs61991641  | 14 | 77,502,798  | T | C | 0.3456 | -0.0093 | 0.0011 | 3.96E-17 |
| rs4903560   | 14 | 77,682,892  | C | G | 0.3711 | -0.0052 | 0.0011 | 1.96E-06 |
| rs10139828  | 14 | 78,293,304  | T | C | 0.8617 | 0.0099  | 0.0015 | 6.93E-11 |
| rs1950265   | 14 | 78,594,765  | A | C | 0.4382 | 0.0075  | 0.0011 | 9.79E-13 |
| rs17598373  | 14 | 79,815,516  | T | C | 0.5573 | 0.0073  | 0.0011 | 3.89E-12 |
| rs1241919   | 14 | 83,995,695  | A | G | 0.5023 | 0.0052  | 0.0010 | 5.56E-07 |
| rs1779549   | 14 | 84,640,016  | A | C | 0.4623 | 0.0082  | 0.0010 | 6.63E-15 |
| rs2922653   | 14 | 85,008,223  | A | T | 0.2151 | -0.0125 | 0.0013 | 1.29E-22 |
| rs56215629  | 14 | 85,102,528  | T | G | 0.2301 | 0.0096  | 0.0012 | 1.33E-14 |
| rs1129671   | 14 | 86,093,378  | T | C | 0.2715 | 0.0061  | 0.0012 | 1.86E-07 |
| rs7151326   | 14 | 86,387,845  | T | G | 0.3944 | -0.0087 | 0.0011 | 5.69E-16 |
| rs6575022   | 14 | 89,279,099  | A | G | 0.4114 | 0.0068  | 0.0011 | 1.25E-10 |
| rs4904523   | 14 | 89,723,630  | A | G | 0.5176 | -0.0075 | 0.0010 | 1.05E-12 |
| rs2008486   | 14 | 89,863,756  | A | C | 0.5046 | -0.0063 | 0.0010 | 2.34E-09 |
| rs1296091   | 14 | 91,515,754  | T | C | 0.2435 | 0.0088  | 0.0012 | 7.29E-13 |
| rs7156027   | 14 | 92,579,232  | C | G | 0.4538 | -0.0062 | 0.0011 | 3.86E-09 |
| rs4900134   | 14 | 92,967,120  | T | C | 0.4680 | 0.0050  | 0.0011 | 1.64E-06 |
| rs6575340   | 14 | 94,023,972  | A | G | 0.6400 | -0.0090 | 0.0011 | 1.36E-16 |
| rs10146814  | 14 | 94,518,209  | C | G | 0.4209 | 0.0055  | 0.0011 | 1.68E-07 |
| rs36033348  | 14 | 98,438,791  | T | C | 0.9070 | -0.0146 | 0.0018 | 6.28E-16 |
| rs17096452  | 14 | 98,578,983  | A | T | 0.7830 | 0.0114  | 0.0013 | 3.18E-19 |
| rs7157095   | 14 | 98,812,847  | T | C | 0.8183 | -0.0073 | 0.0014 | 8.89E-08 |
| rs8017517   | 14 | 99,055,601  | A | G | 0.1734 | 0.0063  | 0.0014 | 4.40E-06 |
| rs2614463   | 14 | 99,746,274  | A | T | 0.5874 | -0.0099 | 0.0011 | 1.32E-20 |
| rs34891372  | 14 | 100,171,990 | A | G | 0.3779 | -0.0066 | 0.0011 | 1.20E-09 |
| rs1957514   | 14 | 100,186,443 | A | G | 0.4576 | 0.0013  | 0.0011 | 2.15E-01 |
| rs7147581   | 14 | 101,028,840 | T | C | 0.5848 | 0.0060  | 0.0011 | 1.37E-08 |
| rs35355082  | 14 | 101,355,078 | A | G | 0.7698 | -0.0078 | 0.0012 | 4.60E-10 |
| rs8011681   | 14 | 101,541,337 | T | G | 0.4624 | -0.0077 | 0.0011 | 2.34E-13 |
| rs12432879  | 14 | 101,688,977 | A | G | 0.2856 | -0.0052 | 0.0012 | 6.30E-06 |
| rs68192024  | 14 | 101,906,454 | T | C | 0.7422 | -0.0085 | 0.0012 | 1.27E-12 |
| rs8006699   | 14 | 103,194,998 | A | G | 0.8263 | 0.0096  | 0.0014 | 3.32E-12 |
| rs9718      | 14 | 103,810,966 | T | C | 0.0311 | -0.0165 | 0.0030 | 5.35E-08 |
| rs7156076   | 14 | 104,892,153 | A | G | 0.7641 | -0.0061 | 0.0012 | 8.64E-07 |
| rs10147348  | 14 | 105,363,202 | A | G | 0.2189 | -0.0054 | 0.0013 | 2.44E-05 |
| rs7174566   | 15 | 26,815,651  | T | C | 0.4809 | -0.0080 | 0.0010 | 2.89E-14 |

|             |    |            |   |   |        |         |        |          |
|-------------|----|------------|---|---|--------|---------|--------|----------|
| rs6606909   | 15 | 27,241,301 | A | G | 0.4599 | 0.0069  | 0.0010 | 6.20E-11 |
| rs11633934  | 15 | 27,994,731 | A | C | 0.5433 | 0.0080  | 0.0011 | 2.10E-14 |
| rs72712694  | 15 | 28,307,735 | T | C | 0.9449 | -0.0114 | 0.0023 | 9.32E-07 |
| rs35483472  | 15 | 34,653,914 | T | C | 0.3808 | -0.0076 | 0.0011 | 2.76E-12 |
| rs1961225   | 15 | 36,127,236 | T | C | 0.4208 | 0.0077  | 0.0011 | 3.37E-13 |
| rs938003    | 15 | 36,284,652 | A | G | 0.2370 | -0.0067 | 0.0012 | 4.67E-08 |
| rs2381964   | 15 | 37,430,936 | T | C | 0.1853 | -0.0065 | 0.0013 | 1.40E-06 |
| rs16966271  | 15 | 38,423,730 | T | C | 0.2831 | 0.0100  | 0.0012 | 8.78E-18 |
| rs56059718  | 15 | 38,836,777 | A | C | 0.1943 | -0.0122 | 0.0013 | 3.81E-20 |
| rs62004060  | 15 | 40,250,050 | C | G | 0.1607 | -0.0074 | 0.0014 | 2.52E-07 |
| rs16970633  | 15 | 40,642,877 | T | G | 0.1582 | -0.0111 | 0.0014 | 7.66E-15 |
| rs936580    | 15 | 40,924,578 | A | G | 0.1532 | 0.0111  | 0.0015 | 1.89E-14 |
| rs748404    | 15 | 43,559,231 | T | C | 0.7784 | -0.0082 | 0.0013 | 7.35E-11 |
| rs28561815  | 15 | 47,292,863 | T | G | 0.2955 | 0.0068  | 0.0012 | 4.89E-09 |
| rs2860049   | 15 | 47,515,395 | T | G | 0.3840 | -0.0096 | 0.0011 | 3.72E-19 |
| rs489692    | 15 | 47,639,354 | T | C | 0.6020 | 0.0044  | 0.0011 | 3.48E-05 |
| rs34488670  | 15 | 47,684,936 | T | C | 0.7882 | 0.0140  | 0.0013 | 6.79E-28 |
| rs8036279   | 15 | 47,986,129 | A | T | 0.5316 | 0.0088  | 0.0010 | 6.99E-17 |
| rs72727293  | 15 | 49,736,189 | A | G | 0.0121 | 0.0255  | 0.0049 | 1.67E-07 |
| rs17522169  | 15 | 51,400,745 | T | G | 0.1073 | 0.0119  | 0.0017 | 1.74E-12 |
| rs2061425   | 15 | 51,748,146 | T | C | 0.7522 | -0.0088 | 0.0012 | 3.65E-13 |
| rs12148800  | 15 | 54,320,769 | T | C | 0.5174 | 0.0055  | 0.0010 | 1.80E-07 |
| rs1919171   | 15 | 55,345,316 | C | G | 0.3831 | -0.0070 | 0.0011 | 6.38E-11 |
| rs4561398   | 15 | 55,932,617 | T | C | 0.4850 | -0.0089 | 0.0010 | 2.53E-17 |
| rs12442630  | 15 | 57,148,007 | A | T | 0.9686 | 0.0232  | 0.0030 | 1.01E-14 |
| rs2431023   | 15 | 57,553,832 | A | T | 0.4166 | 0.0105  | 0.0011 | 3.52E-23 |
| rs75746156  | 15 | 58,618,756 | C | G | 0.9258 | 0.0109  | 0.0020 | 4.78E-08 |
| rs12916023  | 15 | 61,456,053 | A | G | 0.4908 | -0.0085 | 0.0010 | 5.19E-16 |
| rs193234479 | 15 | 65,004,884 | C | G | 0.9987 | -0.0855 | 0.0153 | 2.17E-08 |
| rs9635366   | 15 | 65,804,986 | A | G | 0.1830 | 0.0161  | 0.0014 | 1.98E-32 |
| rs35414043  | 15 | 66,839,394 | A | G | 0.0764 | -0.0154 | 0.0020 | 5.58E-15 |
| rs72749398  | 15 | 67,965,602 | T | C | 0.1491 | 0.0098  | 0.0015 | 2.70E-11 |
| rs62007773  | 15 | 69,941,370 | T | C | 0.5616 | 0.0077  | 0.0011 | 4.01E-13 |
| rs378342    | 15 | 70,186,171 | T | C | 0.2675 | -0.0081 | 0.0012 | 5.44E-12 |
| rs975210    | 15 | 70,364,352 | A | G | 0.1710 | -0.0096 | 0.0014 | 4.85E-12 |
| rs149926387 | 15 | 70,767,116 | A | G | 0.9829 | 0.0211  | 0.0041 | 3.14E-07 |
| rs10468056  | 15 | 73,377,122 | T | G | 0.3464 | 0.0114  | 0.0011 | 9.50E-25 |
| rs112979086 | 15 | 73,822,918 | T | G | 0.0206 | -0.0222 | 0.0037 | 1.68E-09 |
| rs1382421   | 15 | 74,019,836 | A | G | 0.6558 | -0.0065 | 0.0011 | 3.43E-09 |
| rs12438304  | 15 | 74,099,773 | T | C | 0.1310 | 0.0136  | 0.0016 | 1.49E-18 |
| rs12914489  | 15 | 74,187,937 | A | G | 0.1035 | -0.0130 | 0.0017 | 4.19E-14 |
| rs4886633   | 15 | 75,178,207 | A | G | 0.6931 | 0.0078  | 0.0011 | 5.31E-12 |
| rs12912465  | 15 | 77,309,459 | T | C | 0.2689 | -0.0091 | 0.0012 | 1.79E-14 |
| rs11636649  | 15 | 78,031,458 | A | C | 0.4383 | 0.0104  | 0.0011 | 4.39E-23 |
| rs12439144  | 15 | 78,536,924 | A | G | 0.3889 | 0.0070  | 0.0011 | 8.47E-11 |
| rs57087680  | 15 | 80,835,016 | C | G | 0.3431 | -0.0084 | 0.0011 | 3.26E-14 |
| rs12905247  | 15 | 82,236,187 | T | G | 0.5135 | 0.0062  | 0.0010 | 3.40E-09 |
| rs4778691   | 15 | 83,508,278 | A | T | 0.4830 | -0.0072 | 0.0010 | 5.37E-12 |

|             |    |            |   |   |        |         |        |          |
|-------------|----|------------|---|---|--------|---------|--------|----------|
| rs2435953   | 15 | 87,023,567 | A | G | 0.6747 | -0.0069 | 0.0011 | 7.76E-10 |
| rs2289352   | 15 | 90,022,837 | T | C | 0.1760 | 0.0070  | 0.0014 | 4.28E-07 |
| rs8032553   | 15 | 90,137,325 | A | G | 0.4857 | -0.0070 | 0.0011 | 3.28E-11 |
| rs7173089   | 15 | 92,438,457 | T | C | 0.3891 | -0.0090 | 0.0011 | 4.39E-17 |
| rs34555786  | 15 | 92,611,169 | A | G | 0.0975 | -0.0096 | 0.0018 | 5.17E-08 |
| rs8035166   | 15 | 92,678,378 | T | G | 0.5174 | 0.0055  | 0.0010 | 1.60E-07 |
| rs72761930  | 15 | 93,432,740 | T | C | 0.9315 | 0.0096  | 0.0021 | 4.03E-06 |
| rs11856160  | 15 | 93,452,846 | A | G | 0.8429 | 0.0126  | 0.0014 | 2.04E-18 |
| rs7172133   | 15 | 96,025,311 | A | C | 0.6869 | 0.0074  | 0.0011 | 4.92E-11 |
| rs2584240   | 15 | 96,267,139 | A | T | 0.8912 | -0.0113 | 0.0017 | 1.51E-11 |
| rs10520808  | 15 | 96,647,766 | A | C | 0.5437 | 0.0066  | 0.0011 | 2.69E-10 |
| rs72751302  | 15 | 96,910,355 | A | G | 0.2027 | 0.0110  | 0.0013 | 3.99E-17 |
| rs28473320  | 15 | 97,462,529 | T | C | 0.6969 | -0.0071 | 0.0011 | 3.52E-10 |
| rs28522113  | 15 | 97,623,024 | T | C | 0.5533 | 0.0059  | 0.0011 | 2.20E-08 |
| rs61747226  | 15 | 98,512,431 | T | C | 0.0434 | -0.0189 | 0.0026 | 3.41E-13 |
| rs7402939   | 15 | 99,183,876 | T | C | 0.3789 | 0.0068  | 0.0011 | 3.92E-10 |
| rs2858011   | 16 | 247,938    | T | C | 0.6316 | -0.0048 | 0.0011 | 9.26E-06 |
| rs7200589   | 16 | 349,331    | A | G | 0.2617 | 0.0067  | 0.0012 | 1.89E-08 |
| rs78410329  | 16 | 730,830    | T | C | 0.2242 | 0.0178  | 0.0013 | 1.63E-45 |
| rs3751667   | 16 | 1,004,554  | T | C | 0.2291 | -0.0089 | 0.0012 | 1.10E-12 |
| rs35984727  | 16 | 1,251,114  | C | G | 0.7202 | 0.0097  | 0.0012 | 1.29E-16 |
| rs3751664   | 16 | 1,254,369  | T | C | 0.1066 | 0.0137  | 0.0017 | 2.07E-15 |
| rs1811835   | 16 | 1,379,555  | T | C | 0.1157 | 0.0120  | 0.0016 | 2.54E-13 |
| rs58422887  | 16 | 1,915,886  | A | T | 0.1316 | 0.0102  | 0.0016 | 6.10E-11 |
| rs138036227 | 16 | 2,148,271  | A | G | 0.1038 | 0.0087  | 0.0017 | 5.46E-07 |
| rs3751837   | 16 | 3,583,173  | T | C | 0.2217 | 0.0104  | 0.0013 | 1.69E-16 |
| rs12596890  | 16 | 3,588,068  | A | G | 0.7984 | 0.0110  | 0.0013 | 2.42E-17 |
| rs77997837  | 16 | 4,944,256  | T | C | 0.2276 | 0.0088  | 0.0012 | 2.36E-12 |
| rs6500680   | 16 | 5,370,784  | A | G | 0.1145 | -0.0116 | 0.0016 | 1.71E-12 |
| rs527302    | 16 | 5,420,064  | T | C | 0.4201 | -0.0060 | 0.0011 | 1.57E-08 |
| rs2078357   | 16 | 5,672,875  | C | G | 0.8852 | -0.0092 | 0.0016 | 2.70E-08 |
| rs9930253   | 16 | 5,815,334  | A | T | 0.2786 | -0.0099 | 0.0012 | 3.12E-17 |
| rs2343522   | 16 | 6,163,660  | T | G | 0.1507 | -0.0081 | 0.0015 | 3.60E-08 |
| rs8044082   | 16 | 6,603,021  | T | C | 0.3995 | 0.0072  | 0.0011 | 1.83E-11 |
| rs10400992  | 16 | 6,769,566  | C | G | 0.6904 | 0.0061  | 0.0011 | 8.84E-08 |
| rs1492376   | 16 | 6,934,454  | C | G | 0.7188 | -0.0053 | 0.0012 | 6.20E-06 |
| rs12709190  | 16 | 7,261,347  | T | G | 0.6790 | 0.0060  | 0.0011 | 1.08E-07 |
| rs12445627  | 16 | 7,614,876  | A | G | 0.4672 | -0.0066 | 0.0010 | 3.39E-10 |
| rs11077206  | 16 | 7,667,332  | C | G | 0.6124 | 0.0076  | 0.0011 | 2.00E-12 |
| rs881562    | 16 | 7,760,884  | T | G | 0.5086 | 0.0061  | 0.0010 | 8.09E-09 |
| rs11647811  | 16 | 7,945,869  | T | C | 0.1453 | 0.0096  | 0.0015 | 1.09E-10 |
| rs2304467   | 16 | 8,988,777  | C | G | 0.6096 | -0.0055 | 0.0011 | 2.70E-07 |
| rs2965884   | 16 | 9,323,008  | A | C | 0.5735 | -0.0082 | 0.0011 | 8.69E-15 |
| rs62033633  | 16 | 9,577,506  | A | G | 0.8812 | 0.0112  | 0.0016 | 4.13E-12 |
| rs35502861  | 16 | 10,221,878 | T | C | 0.9003 | 0.0130  | 0.0017 | 9.11E-14 |
| rs1097730   | 16 | 10,241,739 | A | G | 0.5053 | -0.0082 | 0.0010 | 6.22E-15 |
| rs13332638  | 16 | 11,905,849 | A | G | 0.0862 | -0.0130 | 0.0019 | 3.12E-12 |
| rs9922788   | 16 | 12,243,932 | A | G | 0.4337 | 0.0103  | 0.0011 | 2.12E-22 |

|             |    |            |   |   |        |         |        |          |
|-------------|----|------------|---|---|--------|---------|--------|----------|
| rs6498296   | 16 | 12,510,149 | C | G | 0.4113 | -0.0088 | 0.0011 | 1.69E-16 |
| rs2856784   | 16 | 12,645,576 | A | G | 0.8359 | -0.0080 | 0.0014 | 1.63E-08 |
| rs1501312   | 16 | 13,137,096 | T | G | 0.6904 | 0.0067  | 0.0011 | 3.02E-09 |
| rs1438706   | 16 | 13,273,066 | T | C | 0.5609 | 0.0066  | 0.0011 | 3.99E-10 |
| rs8048012   | 16 | 13,918,873 | A | G | 0.1729 | 0.0082  | 0.0014 | 3.15E-09 |
| rs17260584  | 16 | 14,653,194 | T | C | 0.2313 | 0.0101  | 0.0012 | 3.23E-16 |
| rs7405130   | 16 | 15,147,725 | T | C | 0.1490 | -0.0140 | 0.0015 | 3.09E-21 |
| rs113571972 | 16 | 17,993,818 | T | G | 0.6782 | -0.0069 | 0.0011 | 5.97E-10 |
| rs6497339   | 16 | 19,277,493 | A | T | 0.4457 | 0.0100  | 0.0011 | 1.90E-21 |
| rs79761300  | 16 | 20,070,404 | T | C | 0.0572 | -0.0113 | 0.0023 | 5.87E-07 |
| rs11074461  | 16 | 20,597,553 | A | G | 0.2084 | -0.0057 | 0.0013 | 1.20E-05 |
| rs146762132 | 16 | 22,241,789 | T | C | 0.0722 | 0.0075  | 0.0020 | 2.24E-04 |
| rs1989806   | 16 | 22,866,683 | T | C | 0.8301 | 0.0100  | 0.0014 | 8.40E-13 |
| rs208626    | 16 | 22,927,887 | A | G | 0.5504 | 0.0060  | 0.0011 | 1.48E-08 |
| rs1858867   | 16 | 23,885,171 | A | T | 0.7331 | -0.0065 | 0.0012 | 3.71E-08 |
| rs11860742  | 16 | 24,369,082 | A | G | 0.0476 | -0.0113 | 0.0025 | 5.76E-06 |
| rs138603410 | 16 | 24,498,899 | A | T | 0.0113 | -0.0252 | 0.0050 | 4.46E-07 |
| rs2303083   | 16 | 24,835,168 | A | G | 0.1889 | 0.0133  | 0.0013 | 2.08E-23 |
| rs10521132  | 16 | 25,720,836 | A | G | 0.2500 | -0.0084 | 0.0012 | 4.79E-12 |
| rs12922671  | 16 | 25,788,819 | T | G | 0.1523 | 0.0091  | 0.0015 | 4.49E-10 |
| rs7192193   | 16 | 26,171,345 | A | G | 0.4309 | 0.0074  | 0.0011 | 2.21E-12 |
| rs11643516  | 16 | 26,456,439 | T | C | 0.4128 | -0.0081 | 0.0011 | 2.22E-14 |
| rs188192    | 16 | 28,131,510 | A | C | 0.2938 | 0.0084  | 0.0011 | 3.08E-13 |
| rs4788080   | 16 | 28,558,081 | T | C | 0.3595 | -0.0134 | 0.0011 | 1.20E-34 |
| rs4889606   | 16 | 31,011,183 | A | G | 0.6110 | -0.0093 | 0.0011 | 5.83E-18 |
| rs1420710   | 16 | 48,826,581 | T | C | 0.7992 | -0.0096 | 0.0013 | 1.93E-13 |
| rs12923113  | 16 | 49,614,518 | A | G | 0.7368 | 0.0074  | 0.0012 | 5.03E-10 |
| rs4785187   | 16 | 49,766,772 | A | G | 0.2233 | -0.0116 | 0.0013 | 2.42E-20 |
| rs9937426   | 16 | 50,926,119 | T | C | 0.2528 | 0.0057  | 0.0012 | 1.84E-06 |
| rs8058137   | 16 | 51,190,580 | A | G | 0.7827 | 0.0147  | 0.0013 | 8.61E-31 |
| rs7195329   | 16 | 51,590,733 | A | G | 0.2635 | 0.0086  | 0.0012 | 5.59E-13 |
| rs16950935  | 16 | 52,243,489 | T | C | 0.2376 | 0.0072  | 0.0012 | 3.81E-09 |
| rs12708881  | 16 | 52,910,760 | A | G | 0.5127 | 0.0076  | 0.0010 | 3.20E-13 |
| rs12922563  | 16 | 53,001,788 | T | C | 0.2380 | -0.0076 | 0.0012 | 5.50E-10 |
| rs12149668  | 16 | 53,156,995 | A | G | 0.3588 | 0.0045  | 0.0011 | 3.96E-05 |
| rs72801843  | 16 | 53,508,802 | A | T | 0.3036 | 0.0152  | 0.0011 | 1.78E-40 |
| rs79994966  | 16 | 53,823,727 | T | C | 0.6087 | -0.0079 | 0.0011 | 1.56E-13 |
| rs2542673   | 16 | 54,206,715 | A | C | 0.3222 | 0.0077  | 0.0011 | 5.55E-12 |
| rs1912413   | 16 | 54,235,440 | A | G | 0.1758 | -0.0087 | 0.0014 | 2.89E-10 |
| rs9928968   | 16 | 54,453,199 | T | C | 0.2231 | -0.0066 | 0.0013 | 1.51E-07 |
| rs1151282   | 16 | 54,627,052 | A | C | 0.2820 | 0.0070  | 0.0012 | 1.59E-09 |
| rs1833249   | 16 | 55,854,971 | T | G | 0.1878 | -0.0076 | 0.0014 | 3.29E-08 |
| rs117501040 | 16 | 56,238,809 | T | C | 0.0226 | 0.0175  | 0.0036 | 1.58E-06 |
| rs10083732  | 16 | 58,855,889 | C | G | 0.2122 | 0.0087  | 0.0013 | 9.80E-12 |
| rs9674209   | 16 | 60,128,063 | T | C | 0.5845 | -0.0070 | 0.0011 | 5.83E-11 |
| rs12709063  | 16 | 60,686,987 | A | G | 0.4925 | -0.0071 | 0.0010 | 1.43E-11 |
| rs12924693  | 16 | 61,031,689 | A | G | 0.8931 | -0.0131 | 0.0017 | 8.28E-15 |
| rs17248751  | 16 | 61,579,618 | A | G | 0.7846 | -0.0138 | 0.0013 | 3.42E-27 |

|            |    |            |   |   |        |         |        |          |
|------------|----|------------|---|---|--------|---------|--------|----------|
| rs58816741 | 16 | 61,775,810 | C | G | 0.5596 | 0.0077  | 0.0011 | 2.49E-13 |
| rs74710412 | 16 | 62,086,038 | A | G | 0.1592 | 0.0138  | 0.0014 | 8.74E-22 |
| rs16965057 | 16 | 62,713,963 | T | C | 0.7585 | -0.0083 | 0.0012 | 9.22E-12 |
| rs1364163  | 16 | 63,527,818 | T | C | 0.3416 | -0.0072 | 0.0011 | 6.43E-11 |
| rs7188339  | 16 | 64,949,993 | T | C | 0.3090 | 0.0056  | 0.0011 | 6.25E-07 |
| rs4785819  | 16 | 65,307,151 | T | C | 0.8991 | -0.0144 | 0.0017 | 1.33E-16 |
| rs1327486  | 16 | 65,692,481 | A | G | 0.3142 | -0.0058 | 0.0011 | 3.20E-07 |
| rs10153150 | 16 | 65,803,954 | T | G | 0.1136 | 0.0105  | 0.0016 | 2.06E-10 |
| rs56054285 | 16 | 66,580,607 | A | G | 0.9967 | 0.0532  | 0.0097 | 3.51E-08 |
| rs6499096  | 16 | 66,759,454 | A | C | 0.4143 | 0.0076  | 0.0011 | 1.07E-12 |
| rs2008173  | 16 | 67,856,240 | A | G | 0.8300 | 0.0124  | 0.0014 | 6.82E-19 |
| rs74615093 | 16 | 69,122,043 | A | G | 0.0743 | 0.0114  | 0.0020 | 1.13E-08 |
| rs62052820 | 16 | 69,575,238 | A | G | 0.2170 | -0.0041 | 0.0013 | 1.32E-03 |
| rs11794687 | 16 | 70,294,093 | C | G | 0.9774 | 0.0230  | 0.0036 | 1.77E-10 |
| rs172649   | 16 | 71,596,005 | T | G | 0.6511 | -0.0060 | 0.0011 | 4.35E-08 |
| rs12373065 | 16 | 71,870,032 | A | T | 0.1296 | 0.0099  | 0.0016 | 2.18E-10 |
| rs18466094 | 16 | 72,032,541 | A | G | 0.0060 | -0.0111 | 0.0069 | 1.10E-01 |
| rs17604349 | 16 | 72,210,865 | A | G | 0.1886 | 0.0118  | 0.0013 | 9.40E-19 |
| rs76513770 | 16 | 72,505,534 | T | C | 0.8848 | -0.0138 | 0.0016 | 3.21E-17 |
| rs9922098  | 16 | 73,440,877 | A | G | 0.5234 | 0.0080  | 0.0011 | 2.54E-14 |
| rs729432   | 16 | 73,791,860 | A | G | 0.5776 | -0.0064 | 0.0011 | 1.86E-09 |
| rs20140520 | 16 | 75,652,021 | A | G | 0.9479 | -0.0177 | 0.0027 | 7.79E-11 |
| rs8060784  | 16 | 76,261,952 | T | C | 0.2713 | 0.0075  | 0.0012 | 1.53E-10 |
| rs9935637  | 16 | 76,469,730 | C | G | 0.4488 | 0.0082  | 0.0011 | 8.94E-15 |
| rs7500549  | 16 | 78,243,384 | T | C | 0.4729 | -0.0077 | 0.0011 | 3.09E-13 |
| rs16948711 | 16 | 78,913,115 | A | C | 0.5404 | 0.0053  | 0.0011 | 5.49E-07 |
| rs9934131  | 16 | 80,491,318 | A | G | 0.1848 | 0.0065  | 0.0013 | 1.29E-06 |
| rs28597883 | 16 | 82,647,566 | C | G | 0.4551 | 0.0079  | 0.0011 | 6.15E-14 |
| rs55642658 | 16 | 82,836,162 | T | C | 0.9004 | 0.0125  | 0.0017 | 8.66E-13 |
| rs8044562  | 16 | 82,876,486 | A | G | 0.2846 | -0.0119 | 0.0012 | 8.34E-25 |
| rs7187255  | 16 | 83,274,691 | T | G | 0.1836 | -0.0054 | 0.0014 | 7.14E-05 |
| rs4782779  | 16 | 83,402,943 | A | G | 0.3635 | -0.0080 | 0.0011 | 2.00E-13 |
| rs34485537 | 16 | 83,608,924 | T | C | 0.3949 | 0.0091  | 0.0011 | 2.26E-17 |
| rs12921209 | 16 | 84,100,602 | T | G | 0.7635 | 0.0078  | 0.0012 | 2.05E-10 |
| rs889600   | 16 | 87,390,630 | A | C | 0.4918 | 0.0067  | 0.0010 | 1.80E-10 |
| rs75687828 | 16 | 89,618,876 | A | G | 0.0852 | 0.0191  | 0.0019 | 4.04E-24 |
| rs8047204  | 16 | 89,766,063 | A | G | 0.6296 | 0.0081  | 0.0011 | 9.05E-14 |
| rs2586238  | 17 | 902,322    | A | G | 0.4603 | -0.0051 | 0.0011 | 1.35E-06 |
| rs6502670  | 17 | 1,328,381  | T | G | 0.6201 | -0.0075 | 0.0011 | 7.56E-12 |
| rs4790841  | 17 | 1,835,482  | T | C | 0.1540 | 0.0100  | 0.0015 | 6.07E-12 |
| rs2447091  | 17 | 2,296,014  | T | C | 0.6112 | 0.0091  | 0.0011 | 2.39E-17 |
| rs2054039  | 17 | 4,014,538  | A | C | 0.3887 | 0.0067  | 0.0011 | 4.89E-10 |
| rs9914251  | 17 | 5,394,882  | A | G | 0.7579 | 0.0077  | 0.0012 | 2.97E-10 |
| rs12453239 | 17 | 6,359,353  | A | T | 0.4992 | -0.0061 | 0.0010 | 7.99E-09 |
| rs1807430  | 17 | 6,467,252  | C | G | 0.0801 | -0.0085 | 0.0019 | 1.16E-05 |
| rs7502384  | 17 | 7,203,141  | C | G | 0.6656 | -0.0063 | 0.0011 | 1.31E-08 |
| rs55749333 | 17 | 7,371,932  | T | C | 0.6416 | -0.0066 | 0.0011 | 1.12E-09 |
| rs3948593  | 17 | 7,615,364  | T | C | 0.1628 | -0.0097 | 0.0014 | 9.65E-12 |

|             |    |            |   |   |        |         |        |          |
|-------------|----|------------|---|---|--------|---------|--------|----------|
| rs8067165   | 17 | 8,031,936  | C | G | 0.3993 | -0.0063 | 0.0011 | 4.41E-09 |
| rs1016135   | 17 | 9,927,583  | A | G | 0.7020 | 0.0047  | 0.0011 | 4.20E-05 |
| rs11078827  | 17 | 9,985,841  | T | C | 0.4940 | -0.0073 | 0.0010 | 3.85E-12 |
| rs79602383  | 17 | 11,925,336 | T | C | 0.7842 | -0.0077 | 0.0013 | 1.52E-09 |
| rs72838750  | 17 | 16,242,993 | T | G | 0.4944 | -0.0088 | 0.0011 | 8.35E-17 |
| rs7224739   | 17 | 17,632,478 | A | G | 0.4281 | 0.0074  | 0.0011 | 3.05E-12 |
| rs2428373   | 17 | 18,911,386 | T | C | 0.1466 | -0.0083 | 0.0015 | 2.98E-08 |
| rs79400257  | 17 | 19,266,621 | T | C | 0.0265 | -0.0193 | 0.0033 | 4.35E-09 |
| rs1638526   | 17 | 19,848,450 | T | C | 0.7414 | 0.0089  | 0.0012 | 1.08E-13 |
| rs8614      | 17 | 27,588,806 | A | C | 0.1872 | -0.0127 | 0.0013 | 2.70E-21 |
| rs3103307   | 17 | 28,660,487 | A | T | 0.5841 | -0.0084 | 0.0011 | 3.03E-15 |
| rs9891803   | 17 | 31,609,815 | T | C | 0.4965 | -0.0095 | 0.0010 | 1.57E-19 |
| rs2277623   | 17 | 32,484,467 | T | G | 0.3792 | 0.0062  | 0.0011 | 1.09E-08 |
| rs4795938   | 17 | 32,908,064 | T | C | 0.1483 | 0.0083  | 0.0015 | 1.70E-08 |
| rs8072494   | 17 | 33,256,917 | A | G | 0.7895 | -0.0116 | 0.0013 | 1.65E-19 |
| rs225285    | 17 | 33,931,084 | C | G | 0.7290 | -0.0088 | 0.0012 | 9.97E-14 |
| rs12937411  | 17 | 34,950,239 | T | C | 0.4094 | 0.0106  | 0.0011 | 1.66E-23 |
| rs853199    | 17 | 35,850,225 | T | C | 0.3550 | 0.0086  | 0.0011 | 3.84E-15 |
| rs72821558  | 17 | 37,210,273 | T | G | 0.8694 | 0.0071  | 0.0016 | 4.73E-06 |
| rs12453682  | 17 | 37,770,005 | T | C | 0.6867 | 0.0111  | 0.0011 | 6.47E-23 |
| rs4793090   | 17 | 40,686,342 | A | G | 0.6671 | 0.0071  | 0.0011 | 1.37E-10 |
| rs4793084   | 17 | 42,317,371 | T | G | 0.6939 | -0.0097 | 0.0011 | 1.10E-17 |
| rs8078137   | 17 | 42,523,489 | A | T | 0.4442 | -0.0067 | 0.0011 | 2.68E-10 |
| rs4793166   | 17 | 43,035,377 | A | G | 0.1713 | -0.0096 | 0.0014 | 4.95E-12 |
| rs730953    | 17 | 43,102,286 | A | C | 0.3815 | -0.0037 | 0.0011 | 6.93E-04 |
| rs60814418  | 17 | 43,850,645 | T | C | 0.2242 | -0.0226 | 0.0013 | 5.23E-72 |
| rs370558872 | 17 | 44,086,726 | T | C | 0.7764 | 0.0233  | 0.0015 | 4.03E-58 |
| rs180677902 | 17 | 44,176,496 | T | G | 0.9988 | 0.0081  | 0.0175 | 6.45E-01 |
| rs4267364   | 17 | 45,781,264 | A | G | 0.3855 | -0.0055 | 0.0011 | 2.69E-07 |
| rs8067005   | 17 | 46,119,775 | T | C | 0.2116 | -0.0074 | 0.0013 | 9.58E-09 |
| rs9899056   | 17 | 48,186,942 | A | G | 0.3994 | 0.0070  | 0.0011 | 6.71E-11 |
| rs3744661   | 17 | 49,255,974 | C | G | 0.3191 | 0.0059  | 0.0011 | 1.66E-07 |
| rs12453010  | 17 | 50,316,131 | T | C | 0.3943 | -0.0107 | 0.0011 | 1.10E-23 |
| rs2631535   | 17 | 50,396,092 | A | G | 0.3289 | 0.0123  | 0.0011 | 2.44E-28 |
| rs1887608   | 17 | 50,438,095 | A | C | 0.6996 | 0.0034  | 0.0011 | 2.55E-03 |
| rs4597364   | 17 | 51,875,791 | T | C | 0.6643 | -0.0069 | 0.0011 | 7.25E-10 |
| rs6504875   | 17 | 52,098,609 | T | G | 0.5581 | 0.0090  | 0.0011 | 1.56E-17 |
| rs72833096  | 17 | 55,655,932 | C | G | 0.1481 | -0.0107 | 0.0015 | 4.70E-13 |
| rs12602072  | 17 | 56,144,013 | A | G | 0.8141 | 0.0094  | 0.0013 | 3.75E-12 |
| rs35258348  | 17 | 56,421,097 | T | G | 0.7111 | -0.0073 | 0.0012 | 2.97E-10 |
| rs60053512  | 17 | 60,095,315 | A | G | 0.1559 | 0.0123  | 0.0014 | 1.28E-17 |
| rs11079486  | 17 | 60,838,653 | A | G | 0.4241 | -0.0056 | 0.0011 | 1.02E-07 |
| rs117558214 | 17 | 61,404,421 | A | G | 0.1947 | 0.0082  | 0.0013 | 4.34E-10 |
| rs6504417   | 17 | 64,379,240 | T | C | 0.3446 | -0.0063 | 0.0011 | 9.01E-09 |
| rs1961378   | 17 | 65,480,090 | A | C | 0.4543 | -0.0071 | 0.0011 | 1.09E-11 |
| rs707247    | 17 | 67,426,612 | A | T | 0.4767 | 0.0063  | 0.0010 | 1.60E-09 |
| rs4647881   | 17 | 74,538,466 | A | C | 0.7853 | -0.0074 | 0.0013 | 9.98E-09 |
| rs8073654   | 17 | 74,746,425 | T | C | 0.5670 | 0.0070  | 0.0011 | 3.63E-11 |

|             |    |            |   |   |        |         |        |          |
|-------------|----|------------|---|---|--------|---------|--------|----------|
| rs62641985  | 17 | 75,854,593 | T | C | 0.7408 | 0.0065  | 0.0012 | 5.69E-08 |
| rs870681    | 17 | 77,773,876 | A | C | 0.7450 | -0.0078 | 0.0012 | 8.89E-11 |
| rs1131610   | 17 | 78,442,655 | T | C | 0.0533 | 0.0112  | 0.0023 | 1.81E-06 |
| rs1128687   | 17 | 78,973,474 | T | C | 0.5708 | -0.0081 | 0.0011 | 1.75E-14 |
| rs11657342  | 17 | 79,355,294 | A | G | 0.3671 | 0.0146  | 0.0023 | 4.79E-10 |
| rs62079997  | 17 | 80,076,888 | T | C | 0.5644 | -0.0068 | 0.0011 | 1.50E-10 |
| rs56075787  | 17 | 80,481,434 | T | C | 0.2271 | -0.0076 | 0.0013 | 1.50E-09 |
| rs476476    | 18 | 2,738,162  | T | C | 0.5576 | -0.0064 | 0.0011 | 1.28E-09 |
| rs3862174   | 18 | 3,817,521  | A | G | 0.7494 | 0.0061  | 0.0012 | 4.54E-07 |
| rs9963991   | 18 | 4,733,644  | T | C | 0.6684 | -0.0061 | 0.0011 | 4.62E-08 |
| rs34864428  | 18 | 4,804,596  | A | T | 0.7896 | 0.0069  | 0.0013 | 6.47E-08 |
| rs28785855  | 18 | 5,272,516  | T | G | 0.5126 | 0.0054  | 0.0010 | 2.33E-07 |
| rs34948998  | 18 | 5,879,800  | A | T | 0.4804 | 0.0078  | 0.0010 | 1.20E-13 |
| rs28656885  | 18 | 5,891,637  | A | C | 0.3875 | -0.0056 | 0.0011 | 1.81E-07 |
| rs11081404  | 18 | 8,693,001  | T | G | 0.4256 | 0.0059  | 0.0011 | 2.56E-08 |
| rs4798708   | 18 | 8,885,393  | T | G | 0.5324 | 0.0056  | 0.0010 | 7.30E-08 |
| rs4798783   | 18 | 9,174,885  | A | G | 0.7072 | -0.0115 | 0.0011 | 1.26E-23 |
| rs7240432   | 18 | 9,590,896  | T | G | 0.3583 | 0.0104  | 0.0011 | 1.74E-21 |
| rs62080301  | 18 | 9,633,139  | A | G | 0.6418 | 0.0061  | 0.0011 | 1.92E-08 |
| rs692833    | 18 | 13,135,433 | T | G | 0.3821 | 0.0064  | 0.0011 | 2.50E-09 |
| rs7237509   | 18 | 13,944,255 | T | C | 0.5509 | 0.0053  | 0.0011 | 5.50E-07 |
| rs303752    | 18 | 21,074,255 | A | G | 0.4049 | -0.0060 | 0.0011 | 1.47E-08 |
| rs4800573   | 18 | 22,059,670 | A | G | 0.1600 | -0.0083 | 0.0014 | 7.46E-09 |
| rs72887889  | 18 | 22,402,325 | A | T | 0.8083 | -0.0094 | 0.0013 | 1.86E-12 |
| rs9956721   | 18 | 22,621,869 | A | T | 0.5850 | -0.0132 | 0.0011 | 1.82E-35 |
| rs4800203   | 18 | 22,646,549 | A | C | 0.1320 | -0.0161 | 0.0015 | 2.05E-25 |
| rs1941912   | 18 | 23,330,422 | T | C | 0.4363 | 0.0050  | 0.0011 | 2.58E-06 |
| rs34116308  | 18 | 25,486,533 | A | G | 0.0282 | -0.0113 | 0.0032 | 3.87E-04 |
| rs1220027   | 18 | 25,656,665 | T | C | 0.2931 | 0.0097  | 0.0011 | 2.50E-17 |
| rs7243759   | 18 | 25,750,331 | A | G | 0.2297 | -0.0026 | 0.0012 | 3.51E-02 |
| rs356830    | 18 | 26,323,802 | A | G | 0.2523 | -0.0072 | 0.0012 | 2.14E-09 |
| rs145278958 | 18 | 26,535,230 | T | C | 0.0314 | -0.0144 | 0.0031 | 2.74E-06 |
| rs9952808   | 18 | 26,648,973 | C | G | 0.6292 | -0.0059 | 0.0011 | 5.34E-08 |
| rs4337371   | 18 | 27,615,045 | A | G | 0.1834 | 0.0084  | 0.0014 | 4.48E-10 |
| rs6508686   | 18 | 28,003,696 | A | G | 0.5902 | 0.0052  | 0.0011 | 9.74E-07 |
| rs2591114   | 18 | 28,372,663 | A | G | 0.5455 | -0.0081 | 0.0011 | 1.82E-14 |
| rs273027    | 18 | 30,685,045 | A | G | 0.9254 | 0.0135  | 0.0020 | 1.09E-11 |
| rs12957987  | 18 | 31,212,209 | A | G | 0.4783 | 0.0087  | 0.0010 | 1.48E-16 |
| rs1493921   | 18 | 31,451,052 | T | C | 0.3836 | 0.0092  | 0.0011 | 1.36E-17 |
| rs12604573  | 18 | 31,786,639 | A | G | 0.5594 | -0.0093 | 0.0011 | 7.34E-19 |
| rs12709690  | 18 | 35,165,852 | T | C | 0.3548 | -0.0186 | 0.0011 | 9.28E-65 |
| rs1944386   | 18 | 36,037,621 | T | C | 0.6447 | -0.0082 | 0.0011 | 5.51E-14 |
| rs10432182  | 18 | 36,557,457 | A | G | 0.2238 | -0.0120 | 0.0013 | 8.80E-22 |
| rs12962980  | 18 | 36,915,043 | C | G | 0.1822 | 0.0168  | 0.0014 | 2.40E-35 |
| rs7233920   | 18 | 37,416,318 | A | G | 0.2285 | -0.0115 | 0.0012 | 2.20E-20 |
| rs4553692   | 18 | 38,040,163 | A | G | 0.3714 | 0.0112  | 0.0011 | 4.25E-25 |
| rs80020939  | 18 | 38,905,390 | A | T | 0.0497 | -0.0146 | 0.0024 | 1.41E-09 |
| rs56408129  | 18 | 39,016,483 | A | T | 0.7836 | -0.0083 | 0.0015 | 1.93E-08 |



|             |    |            |   |   |        |         |        |          |
|-------------|----|------------|---|---|--------|---------|--------|----------|
| rs72900102  | 18 | 39,073,303 | A | T | 0.8400 | 0.0088  | 0.0014 | 8.23E-10 |
| rs72892182  | 18 | 39,283,319 | A | G | 0.0570 | 0.0202  | 0.0023 | 4.29E-19 |
| rs9304270   | 18 | 39,937,509 | T | C | 0.1322 | 0.0089  | 0.0015 | 7.14E-09 |
| rs58137875  | 18 | 40,230,965 | A | G | 0.2691 | -0.0105 | 0.0012 | 7.10E-19 |
| rs62089898  | 18 | 40,317,168 | A | G | 0.0351 | 0.0182  | 0.0029 | 2.30E-10 |
| rs12326432  | 18 | 41,486,749 | T | C | 0.1719 | -0.0097 | 0.0014 | 3.05E-12 |
| rs80090296  | 18 | 42,110,459 | T | C | 0.1693 | -0.0084 | 0.0014 | 1.98E-09 |
| rs11877152  | 18 | 42,754,468 | T | C | 0.8905 | -0.0143 | 0.0017 | 1.89E-17 |
| rs78269855  | 18 | 44,022,942 | A | G | 0.9275 | 0.0126  | 0.0020 | 4.86E-10 |
| rs34939493  | 18 | 44,795,621 | T | G | 0.4296 | 0.0097  | 0.0011 | 6.88E-20 |
| rs62092937  | 18 | 48,748,903 | T | C | 0.4459 | -0.0080 | 0.0011 | 3.30E-14 |
| rs322547    | 18 | 49,137,585 | A | G | 0.2730 | -0.0079 | 0.0012 | 2.01E-11 |
| rs34418947  | 18 | 49,993,455 | A | G | 0.4119 | -0.0066 | 0.0011 | 5.46E-10 |
| rs78324365  | 18 | 50,458,734 | A | G | 0.0804 | 0.0173  | 0.0019 | 2.49E-19 |
| rs11664320  | 18 | 50,872,623 | T | C | 0.5649 | 0.0176  | 0.0011 | 2.21E-62 |
| rs9807112   | 18 | 52,541,788 | T | C | 0.6859 | -0.0085 | 0.0011 | 5.37E-14 |
| rs4128242   | 18 | 52,747,689 | T | C | 0.5966 | -0.0083 | 0.0011 | 7.10E-15 |
| rs660010    | 18 | 53,310,969 | C | G | 0.1408 | 0.0186  | 0.0015 | 3.24E-35 |
| rs11368242  | 18 | 53,344,221 | A | G | 0.0067 | -0.0256 | 0.0065 | 8.89E-05 |
| rs77882218  | 18 | 53,415,063 | T | C | 0.9716 | -0.0256 | 0.0032 | 4.06E-16 |
| rs2588478   | 18 | 53,625,296 | T | G | 0.5836 | 0.0038  | 0.0011 | 3.05E-04 |
| rs1237629   | 18 | 53,945,160 | A | G | 0.2742 | -0.0049 | 0.0012 | 2.64E-05 |
| rs4940668   | 18 | 56,032,231 | A | G | 0.7003 | -0.0069 | 0.0011 | 1.84E-09 |
| rs75679154  | 18 | 57,054,935 | C | G | 0.9640 | 0.0142  | 0.0028 | 4.82E-07 |
| rs36011282  | 18 | 58,973,546 | A | G | 0.4351 | -0.0083 | 0.0011 | 3.39E-15 |
| rs1053951   | 18 | 60,232,674 | A | G | 0.5723 | -0.0066 | 0.0011 | 4.34E-10 |
| rs12104029  | 18 | 62,509,211 | C | G | 0.5305 | -0.0082 | 0.0010 | 4.08E-15 |
| rs11663822  | 18 | 62,723,912 | A | G | 0.2958 | -0.0057 | 0.0011 | 8.26E-07 |
| rs72944005  | 18 | 63,497,191 | T | C | 0.2537 | 0.0085  | 0.0012 | 1.61E-12 |
| rs62087667  | 18 | 63,798,369 | T | G | 0.2897 | -0.0064 | 0.0012 | 2.49E-08 |
| rs12956778  | 18 | 64,567,975 | T | G | 0.6522 | -0.0064 | 0.0011 | 7.28E-09 |
| rs8095834   | 18 | 65,025,641 | C | G | 0.0359 | -0.0137 | 0.0028 | 1.23E-06 |
| rs623200    | 18 | 66,246,646 | T | C | 0.3849 | 0.0070  | 0.0011 | 5.79E-11 |
| rs17842596  | 18 | 67,565,579 | A | G | 0.6080 | 0.0053  | 0.0011 | 8.51E-07 |
| rs11874177  | 18 | 70,614,375 | T | G | 0.2825 | -0.0067 | 0.0012 | 8.50E-09 |
| rs8092046   | 18 | 71,603,473 | T | C | 0.7634 | -0.0066 | 0.0012 | 7.62E-08 |
| rs79359979  | 18 | 72,933,869 | T | C | 0.0972 | 0.0082  | 0.0018 | 4.76E-06 |
| rs17190980  | 18 | 73,006,280 | T | C | 0.3336 | 0.0084  | 0.0011 | 3.24E-14 |
| rs2554835   | 18 | 74,141,190 | A | G | 0.3889 | 0.0054  | 0.0011 | 4.76E-07 |
| rs684192    | 18 | 74,622,529 | A | G | 0.6353 | -0.0068 | 0.0011 | 3.85E-10 |
| rs4890901   | 18 | 74,846,355 | A | G | 0.6572 | 0.0072  | 0.0011 | 9.25E-11 |
| rs11081529  | 18 | 75,902,735 | T | C | 0.7213 | 0.0123  | 0.0012 | 7.10E-26 |
| rs7236339   | 18 | 77,579,773 | A | G | 0.2174 | -0.0153 | 0.0013 | 1.57E-33 |
| rs62103175  | 18 | 77,622,467 | T | C | 0.1443 | 0.0122  | 0.0015 | 3.07E-16 |
| rs56101188  | 19 | 586,745    | T | C | 0.9054 | 0.0103  | 0.0019 | 3.66E-08 |
| rs10401329  | 19 | 1,871,699  | A | G | 0.1205 | 0.0109  | 0.0016 | 1.22E-11 |
| rs117849041 | 19 | 2,312,903  | T | C | 0.1052 | 0.0116  | 0.0017 | 1.19E-11 |
| rs7255693   | 19 | 2,673,094  | A | C | 0.3108 | 0.0063  | 0.0011 | 3.57E-08 |

|             |    |            |   |   |        |         |        |          |
|-------------|----|------------|---|---|--------|---------|--------|----------|
| rs72989297  | 19 | 3,297,164  | T | G | 0.1344 | -0.0101 | 0.0015 | 6.87E-11 |
| rs11085020  | 19 | 3,446,107  | T | C | 0.6756 | -0.0057 | 0.0011 | 4.41E-07 |
| rs757436    | 19 | 3,826,749  | A | T | 0.4039 | 0.0065  | 0.0011 | 1.49E-09 |
| rs117520996 | 19 | 4,410,003  | T | G | 0.0490 | 0.0220  | 0.0025 | 1.47E-18 |
| rs10419571  | 19 | 4,499,976  | T | C | 0.6825 | -0.0085 | 0.0011 | 4.68E-14 |
| rs10853981  | 19 | 4,965,064  | A | G | 0.3286 | -0.0087 | 0.0011 | 6.64E-15 |
| rs10415488  | 19 | 5,246,717  | T | C | 0.6119 | -0.0060 | 0.0011 | 2.40E-08 |
| rs892058    | 19 | 6,275,584  | A | G | 0.2059 | 0.0073  | 0.0013 | 1.98E-08 |
| rs8104651   | 19 | 9,950,127  | T | C | 0.5576 | -0.0076 | 0.0011 | 4.65E-13 |
| rs12972944  | 19 | 12,713,808 | A | G | 0.6840 | 0.0075  | 0.0011 | 3.50E-11 |
| rs899223    | 19 | 13,157,151 | C | G | 0.0811 | 0.0133  | 0.0019 | 5.07E-12 |
| rs117861106 | 19 | 13,213,801 | T | C | 0.0508 | -0.0187 | 0.0024 | 7.60E-15 |
| rs62109939  | 19 | 13,292,263 | T | C | 0.7921 | -0.0092 | 0.0013 | 3.63E-12 |
| rs12609965  | 19 | 13,917,866 | A | C | 0.2450 | 0.0071  | 0.0012 | 8.05E-09 |
| rs10854143  | 19 | 15,512,720 | T | C | 0.4853 | 0.0066  | 0.0010 | 3.42E-10 |
| rs12974657  | 19 | 18,237,571 | T | C | 0.6826 | 0.0092  | 0.0011 | 3.71E-16 |
| rs12975407  | 19 | 18,443,650 | T | C | 0.5386 | 0.0055  | 0.0011 | 2.12E-07 |
| rs8105994   | 19 | 18,593,553 | T | C | 0.6599 | 0.0058  | 0.0011 | 1.34E-07 |
| rs35359254  | 19 | 18,901,618 | C | G | 0.9038 | 0.0114  | 0.0018 | 1.61E-10 |
| rs12981405  | 19 | 19,651,577 | T | C | 0.1656 | -0.0111 | 0.0014 | 4.09E-15 |
| rs79391487  | 19 | 19,989,679 | T | C | 0.0560 | -0.0146 | 0.0023 | 1.93E-10 |
| rs140182490 | 19 | 29,250,142 | A | G | 0.5819 | -0.0055 | 0.0011 | 1.84E-07 |
| rs7254263   | 19 | 30,741,257 | T | C | 0.2899 | -0.0099 | 0.0012 | 7.90E-18 |
| rs117623407 | 19 | 32,204,489 | A | G | 0.8515 | -0.0111 | 0.0015 | 5.08E-14 |
| rs2240662   | 19 | 32,537,173 | T | G | 0.3420 | -0.0066 | 0.0011 | 2.43E-09 |
| rs4805761   | 19 | 32,951,800 | A | G | 0.1567 | -0.0139 | 0.0014 | 5.97E-22 |
| rs8112297   | 19 | 33,199,783 | A | G | 0.2981 | 0.0057  | 0.0011 | 7.27E-07 |
| rs7249687   | 19 | 33,933,547 | A | G | 0.3605 | 0.0060  | 0.0011 | 4.69E-08 |
| rs35209304  | 19 | 36,175,055 | T | C | 0.1915 | 0.0100  | 0.0013 | 6.16E-14 |
| rs111227517 | 19 | 38,705,694 | T | C | 0.8091 | -0.0085 | 0.0013 | 1.83E-10 |
| rs400078    | 19 | 39,567,447 | T | C | 0.4070 | -0.0057 | 0.0011 | 1.08E-07 |
| rs12983038  | 19 | 39,741,124 | A | G | 0.1914 | -0.0081 | 0.0013 | 1.35E-09 |
| rs405509    | 19 | 45,408,836 | T | G | 0.4811 | 0.0065  | 0.0010 | 4.25E-10 |
| rs10402747  | 19 | 45,815,248 | T | C | 0.5144 | 0.0069  | 0.0011 | 6.54E-11 |
| rs3786824   | 19 | 46,121,982 | A | G | 0.3233 | 0.0076  | 0.0011 | 1.92E-11 |
| rs73566664  | 19 | 46,384,215 | T | G | 0.1494 | -0.0086 | 0.0015 | 6.30E-09 |
| rs62135070  | 19 | 47,615,835 | T | C | 0.0469 | 0.0162  | 0.0030 | 6.76E-08 |
| rs76873944  | 19 | 48,096,678 | A | T | 0.8816 | -0.0095 | 0.0016 | 6.20E-09 |
| rs12976992  | 19 | 50,818,776 | A | G | 0.5222 | -0.0063 | 0.0011 | 2.15E-09 |
| rs217541    | 19 | 54,443,866 | T | C | 0.1487 | -0.0093 | 0.0015 | 3.66E-10 |
| rs17516383  | 19 | 54,926,182 | A | G | 0.3112 | 0.0069  | 0.0012 | 3.06E-09 |
| rs192436652 | 19 | 54,960,747 | T | C | 0.0262 | -0.0276 | 0.0033 | 9.90E-17 |
| rs11667653  | 19 | 57,101,876 | T | C | 0.1897 | -0.0086 | 0.0013 | 1.11E-10 |
| rs62114178  | 19 | 58,778,451 | A | G | 0.3724 | 0.0069  | 0.0011 | 2.49E-10 |
| rs2710873   | 1  | 978,193    | A | G | 0.1607 | -0.0113 | 0.0015 | 1.33E-14 |
| rs12034740  | 1  | 1,728,969  | A | C | 0.4987 | 0.0071  | 0.0010 | 1.15E-11 |
| rs72644658  | 1  | 2,460,608  | A | G | 0.9056 | 0.0077  | 0.0018 | 2.05E-05 |
| rs55972083  | 1  | 2,704,918  | T | G | 0.2153 | -0.0087 | 0.0013 | 1.38E-11 |

|             |   |            |   |   |        |         |        |          |
|-------------|---|------------|---|---|--------|---------|--------|----------|
| rs1572656   | 1 | 2,989,543  | T | G | 0.7998 | 0.0085  | 0.0013 | 6.78E-11 |
| rs2455107   | 1 | 3,180,158  | T | G | 0.8152 | 0.0047  | 0.0014 | 4.43E-04 |
| rs4654441   | 1 | 4,566,515  | A | G | 0.5755 | 0.0072  | 0.0011 | 7.91E-12 |
| rs148623266 | 1 | 4,872,867  | T | C | 0.0159 | 0.0170  | 0.0043 | 8.28E-05 |
| rs12735232  | 1 | 6,867,842  | T | C | 0.8435 | -0.0101 | 0.0014 | 2.28E-12 |
| rs1011124   | 1 | 7,533,164  | A | G | 0.4022 | 0.0084  | 0.0011 | 4.09E-15 |
| rs1058790   | 1 | 8,413,839  | A | G | 0.8205 | -0.0140 | 0.0014 | 1.37E-24 |
| rs58130172  | 1 | 11,540,649 | T | C | 0.2780 | 0.0098  | 0.0012 | 1.39E-16 |
| rs61773907  | 1 | 11,710,991 | A | G | 0.0428 | 0.0073  | 0.0027 | 6.87E-03 |
| rs28455075  | 1 | 11,939,720 | A | G | 0.3106 | 0.0036  | 0.0011 | 1.46E-03 |
| rs7519289   | 1 | 14,951,843 | C | G | 0.6495 | -0.0045 | 0.0011 | 3.77E-05 |
| rs2253371   | 1 | 15,724,003 | A | G | 0.7424 | 0.0087  | 0.0012 | 4.31E-13 |
| rs221063    | 1 | 16,537,289 | T | G | 0.2620 | -0.0062 | 0.0012 | 2.04E-07 |
| rs78116078  | 1 | 18,434,125 | C | G | 0.7184 | 0.0093  | 0.0012 | 1.28E-15 |
| rs10907295  | 1 | 18,536,355 | A | G | 0.6817 | -0.0052 | 0.0011 | 3.47E-06 |
| rs10917518  | 1 | 20,017,738 | T | C | 0.3403 | 0.0039  | 0.0011 | 4.97E-04 |
| rs10916679  | 1 | 20,286,563 | A | C | 0.2682 | 0.0071  | 0.0012 | 1.42E-09 |
| rs2097532   | 1 | 20,551,745 | T | C | 0.6437 | 0.0083  | 0.0011 | 3.74E-14 |
| rs78094866  | 1 | 20,650,384 | T | C | 0.1274 | -0.0098 | 0.0016 | 5.19E-10 |
| rs4615814   | 1 | 20,875,459 | T | C | 0.9070 | -0.0113 | 0.0018 | 3.25E-10 |
| rs115073125 | 1 | 21,189,666 | T | C | 0.0390 | -0.0106 | 0.0032 | 8.01E-04 |
| rs84853     | 1 | 21,641,522 | T | C | 0.4556 | 0.0067  | 0.0011 | 1.91E-10 |
| rs147394161 | 1 | 21,924,946 | T | C | 0.9862 | 0.0167  | 0.0045 | 2.09E-04 |
| rs12142101  | 1 | 21,966,850 | A | G | 0.3971 | -0.0076 | 0.0011 | 1.26E-12 |
| rs829387    | 1 | 22,023,151 | T | G | 0.0892 | 0.0066  | 0.0018 | 3.78E-04 |
| rs61767328  | 1 | 22,977,627 | A | G | 0.3683 | -0.0062 | 0.0011 | 9.48E-09 |
| rs16827646  | 1 | 23,164,756 | T | G | 0.8173 | -0.0049 | 0.0014 | 3.03E-04 |
| rs17184588  | 1 | 24,365,512 | T | C | 0.5130 | -0.0069 | 0.0010 | 3.86E-11 |
| rs9700051   | 1 | 24,959,916 | A | C | 0.4661 | -0.0057 | 0.0010 | 6.16E-08 |
| rs2997447   | 1 | 26,387,423 | A | G | 0.2071 | 0.0050  | 0.0013 | 1.20E-04 |
| rs190737    | 1 | 26,899,444 | A | C | 0.5287 | -0.0061 | 0.0010 | 4.97E-09 |
| rs2318774   | 1 | 29,167,823 | A | T | 0.3288 | -0.0111 | 0.0011 | 3.02E-23 |
| rs114401621 | 1 | 30,196,022 | A | G | 0.0189 | -0.0165 | 0.0039 | 2.55E-05 |
| rs174838    | 1 | 30,407,575 | A | G | 0.2281 | 0.0050  | 0.0012 | 5.77E-05 |
| rs2050256   | 1 | 32,204,683 | A | G | 0.8284 | 0.0156  | 0.0014 | 4.42E-29 |
| rs61229710  | 1 | 34,029,414 | A | G | 0.1581 | -0.0096 | 0.0014 | 1.90E-11 |
| rs3795414   | 1 | 34,285,995 | A | G | 0.5153 | 0.0079  | 0.0010 | 5.69E-14 |
| rs35521053  | 1 | 34,420,852 | A | C | 0.2558 | 0.0046  | 0.0012 | 1.14E-04 |
| rs4622033   | 1 | 35,005,272 | T | C | 0.5963 | -0.0057 | 0.0011 | 8.59E-08 |
| rs72657943  | 1 | 35,330,496 | C | G | 0.8711 | -0.0057 | 0.0016 | 2.66E-04 |
| rs215762    | 1 | 37,581,623 | A | G | 0.3281 | 0.0038  | 0.0011 | 5.77E-04 |
| rs72657787  | 1 | 38,010,243 | A | G | 0.0783 | -0.0149 | 0.0019 | 2.12E-14 |
| rs476012    | 1 | 38,240,901 | A | T | 0.5364 | -0.0075 | 0.0010 | 8.22E-13 |
| rs2799851   | 1 | 38,606,443 | A | G | 0.4642 | 0.0055  | 0.0010 | 1.66E-07 |
| rs6600293   | 1 | 40,083,819 | A | C | 0.0879 | 0.0087  | 0.0018 | 2.32E-06 |
| rs785113    | 1 | 40,154,983 | T | C | 0.2265 | 0.0074  | 0.0013 | 3.45E-09 |
| rs560902305 | 1 | 41,015,446 | T | C | 0.0041 | 0.0338  | 0.0087 | 9.46E-05 |
| rs669863    | 1 | 41,063,956 | A | G | 0.7071 | 0.0062  | 0.0012 | 8.68E-08 |

|             |   |            |   |   |        |         |        |          |
|-------------|---|------------|---|---|--------|---------|--------|----------|
| rs6660666   | 1 | 41,763,018 | T | C | 0.6693 | 0.0067  | 0.0011 | 1.98E-09 |
| rs56409354  | 1 | 41,772,971 | A | G | 0.2182 | -0.0160 | 0.0013 | 1.64E-36 |
| rs2364543   | 1 | 41,833,089 | T | G | 0.6077 | 0.0110  | 0.0011 | 2.22E-24 |
| rs35011283  | 1 | 42,766,283 | T | C | 0.0902 | 0.0072  | 0.0018 | 8.70E-05 |
| rs631248    | 1 | 44,071,221 | A | G | 0.7768 | 0.0206  | 0.0013 | 1.76E-60 |
| rs9787076   | 1 | 44,141,149 | A | C | 0.6711 | -0.0184 | 0.0011 | 3.47E-61 |
| rs78050663  | 1 | 44,378,198 | A | T | 0.9293 | -0.0013 | 0.0021 | 5.35E-01 |
| rs1738050   | 1 | 44,707,295 | C | G | 0.6159 | -0.0110 | 0.0011 | 1.49E-24 |
| rs809774    | 1 | 46,560,244 | A | T | 0.7063 | -0.0080 | 0.0011 | 2.69E-12 |
| rs114331785 | 1 | 50,821,852 | T | C | 0.9795 | 0.0197  | 0.0037 | 1.35E-07 |
| rs2653875   | 1 | 50,862,994 | T | C | 0.4838 | -0.0067 | 0.0010 | 1.50E-10 |
| rs145490767 | 1 | 52,635,178 | C | G | 0.9976 | -0.0388 | 0.0109 | 3.97E-04 |
| rs10788951  | 1 | 53,734,998 | A | T | 0.4045 | -0.0100 | 0.0011 | 1.57E-20 |
| rs112941314 | 1 | 53,961,283 | A | G | 0.0414 | 0.0135  | 0.0027 | 5.21E-07 |
| rs4926634   | 1 | 54,887,598 | A | G | 0.5233 | 0.0052  | 0.0010 | 5.67E-07 |
| rs857161    | 1 | 57,240,469 | T | G | 0.2766 | -0.0039 | 0.0012 | 7.77E-04 |
| rs548897    | 1 | 57,718,030 | A | G | 0.4491 | 0.0096  | 0.0011 | 5.03E-20 |
| rs1917339   | 1 | 57,955,970 | A | G | 0.6468 | 0.0057  | 0.0011 | 1.95E-07 |
| rs1417759   | 1 | 58,053,427 | A | G | 0.7340 | 0.0069  | 0.0012 | 5.76E-09 |
| rs6698015   | 1 | 58,265,352 | T | C | 0.6141 | 0.0087  | 0.0011 | 5.40E-16 |
| rs2764684   | 1 | 58,537,919 | T | C | 0.8279 | 0.0150  | 0.0014 | 2.64E-27 |
| rs7537039   | 1 | 58,717,410 | A | G | 0.5705 | -0.0068 | 0.0011 | 9.55E-11 |
| rs6587843   | 1 | 59,540,811 | T | C | 0.4833 | 0.0074  | 0.0010 | 1.46E-12 |
| rs76408332  | 1 | 61,097,545 | T | C | 0.0428 | 0.0102  | 0.0026 | 7.83E-05 |
| rs6693597   | 1 | 61,582,546 | T | G | 0.8645 | 0.0090  | 0.0015 | 5.60E-09 |
| rs6674884   | 1 | 61,832,445 | A | T | 0.8610 | -0.0126 | 0.0015 | 7.30E-17 |
| rs1168114   | 1 | 63,156,043 | A | G | 0.3306 | -0.0073 | 0.0011 | 5.73E-11 |
| rs11208750  | 1 | 66,257,838 | A | C | 0.1945 | -0.0107 | 0.0013 | 5.73E-16 |
| rs72667460  | 1 | 66,536,012 | T | C | 0.0538 | 0.0178  | 0.0023 | 1.52E-14 |
| rs12731764  | 1 | 66,697,753 | A | G | 0.7396 | -0.0073 | 0.0012 | 8.43E-10 |
| rs17490057  | 1 | 67,109,277 | C | G | 0.0637 | -0.0123 | 0.0021 | 1.09E-08 |
| rs6682534   | 1 | 67,166,666 | T | C | 0.5970 | 0.0047  | 0.0011 | 8.76E-06 |
| rs59861046  | 1 | 68,479,843 | A | G | 0.3642 | 0.0049  | 0.0011 | 5.50E-06 |
| rs12091311  | 1 | 69,121,134 | T | C | 0.9477 | 0.0168  | 0.0024 | 9.38E-13 |
| rs11589723  | 1 | 69,328,993 | T | C | 0.8976 | -0.0127 | 0.0017 | 1.54E-13 |
| rs10789284  | 1 | 69,786,186 | A | G | 0.2445 | -0.0092 | 0.0012 | 3.41E-14 |
| rs4650262   | 1 | 69,882,280 | T | C | 0.1277 | 0.0086  | 0.0016 | 5.38E-08 |
| rs1418004   | 1 | 70,117,448 | T | C | 0.4184 | -0.0081 | 0.0011 | 2.35E-14 |
| rs621996    | 1 | 70,583,889 | A | G | 0.6251 | 0.0062  | 0.0011 | 8.17E-09 |
| rs1213513   | 1 | 72,082,898 | A | G | 0.5922 | 0.0116  | 0.0011 | 8.62E-28 |
| rs34305371  | 1 | 72,733,610 | A | G | 0.0993 | 0.0314  | 0.0018 | 1.77E-71 |
| rs11581447  | 1 | 72,829,683 | A | C | 0.1989 | -0.0196 | 0.0013 | 9.07E-51 |
| rs11210176  | 1 | 73,654,543 | A | G | 0.4849 | 0.0017  | 0.0010 | 1.15E-01 |
| rs10465817  | 1 | 73,975,686 | A | C | 0.3927 | -0.0086 | 0.0011 | 8.09E-16 |
| rs72685887  | 1 | 74,435,586 | A | C | 0.9532 | -0.0190 | 0.0026 | 1.17E-13 |
| rs6702487   | 1 | 74,641,019 | T | C | 0.5237 | 0.0105  | 0.0010 | 1.90E-23 |
| rs280898    | 1 | 75,504,024 | C | G | 0.7303 | -0.0066 | 0.0012 | 2.08E-08 |
| rs77584294  | 1 | 75,541,089 | A | C | 0.0399 | 0.0259  | 0.0027 | 3.86E-22 |

|            |   |             |   |   |        |         |        |          |
|------------|---|-------------|---|---|--------|---------|--------|----------|
| rs76985288 | 1 | 75,741,206  | T | G | 0.9974 | 0.0258  | 0.0107 | 1.58E-02 |
| rs12406883 | 1 | 76,066,498  | A | C | 0.8192 | -0.0084 | 0.0014 | 7.30E-10 |
| rs680970   | 1 | 77,092,222  | T | C | 0.5757 | 0.0071  | 0.0011 | 2.04E-11 |
| rs12722889 | 1 | 77,420,020  | A | T | 0.5711 | 0.0074  | 0.0011 | 2.97E-12 |
| rs6603950  | 1 | 77,938,087  | A | G | 0.4768 | 0.0118  | 0.0010 | 1.48E-29 |
| rs71658797 | 1 | 77,967,507  | A | T | 0.1116 | -0.0175 | 0.0017 | 8.72E-26 |
| rs10782682 | 1 | 79,622,435  | T | C | 0.4853 | 0.0033  | 0.0010 | 1.82E-03 |
| rs1279697  | 1 | 81,099,554  | A | G | 0.7986 | -0.0077 | 0.0013 | 3.13E-09 |
| rs11163305 | 1 | 81,947,234  | A | G | 0.7731 | -0.0065 | 0.0012 | 2.34E-07 |
| rs17429851 | 1 | 82,390,031  | A | C | 0.9451 | -0.0089 | 0.0023 | 1.00E-04 |
| rs11163454 | 1 | 82,739,679  | C | G | 0.1256 | 0.0072  | 0.0016 | 5.33E-06 |
| rs2031707  | 1 | 83,288,825  | T | C | 0.7444 | -0.0054 | 0.0012 | 8.44E-06 |
| rs56270529 | 1 | 83,641,362  | A | G | 0.8289 | -0.0072 | 0.0014 | 2.77E-07 |
| rs3895004  | 1 | 85,041,144  | A | G | 0.6468 | -0.0059 | 0.0011 | 7.11E-08 |
| rs2807950  | 1 | 87,557,999  | A | G | 0.7916 | -0.0060 | 0.0013 | 3.22E-06 |
| rs11134970 | 1 | 87,719,452  | A | G | 0.3223 | 0.0066  | 0.0011 | 4.04E-09 |
| rs12142415 | 1 | 88,578,657  | T | C | 0.7670 | 0.0073  | 0.0012 | 3.64E-09 |
| rs7412939  | 1 | 88,715,934  | C | G | 0.5892 | -0.0055 | 0.0011 | 2.60E-07 |
| rs61767083 | 1 | 89,052,758  | C | G | 0.4084 | -0.0078 | 0.0011 | 2.97E-13 |
| rs34738385 | 1 | 89,804,736  | T | C | 0.7313 | -0.0052 | 0.0012 | 1.12E-05 |
| rs6684189  | 1 | 91,093,014  | T | C | 0.6302 | -0.0084 | 0.0011 | 6.79E-15 |
| rs12089815 | 1 | 91,189,933  | A | G | 0.5396 | 0.0185  | 0.0011 | 1.14E-69 |
| rs7532549  | 1 | 93,539,656  | T | G | 0.6607 | 0.0129  | 0.0011 | 1.89E-31 |
| rs23766    | 1 | 94,032,097  | A | G | 0.2278 | -0.0109 | 0.0012 | 2.25E-18 |
| rs72723192 | 1 | 94,389,345  | T | C | 0.1633 | -0.0079 | 0.0014 | 2.22E-08 |
| rs695032   | 1 | 96,101,891  | A | G | 0.7433 | 0.0065  | 0.0012 | 5.54E-08 |
| rs6678734  | 1 | 96,176,563  | A | G | 0.5025 | 0.0111  | 0.0010 | 3.34E-26 |
| rs321250   | 1 | 96,470,547  | T | G | 0.4225 | -0.0088 | 0.0011 | 7.64E-17 |
| rs17426562 | 1 | 97,036,113  | A | G | 0.0646 | 0.0170  | 0.0021 | 1.53E-15 |
| rs4433451  | 1 | 97,378,162  | T | C | 0.0655 | -0.0093 | 0.0021 | 1.15E-05 |
| rs6677502  | 1 | 97,852,932  | T | C | 0.7958 | -0.0078 | 0.0013 | 2.59E-09 |
| rs79807948 | 1 | 97,923,785  | A | G | 0.9569 | 0.0144  | 0.0026 | 2.60E-08 |
| rs4378243  | 1 | 98,395,881  | T | G | 0.8392 | 0.0162  | 0.0014 | 4.75E-30 |
| rs14860384 | 1 | 98,632,274  | A | C | 0.0735 | -0.0076 | 0.0020 | 1.62E-04 |
| rs12124493 | 1 | 98,765,641  | A | G | 0.3130 | -0.0117 | 0.0011 | 3.43E-25 |
| rs35391040 | 1 | 99,161,184  | A | C | 0.0066 | 0.0221  | 0.0066 | 7.65E-04 |
| rs6692379  | 1 | 99,221,575  | A | G | 0.1897 | -0.0078 | 0.0013 | 6.16E-09 |
| rs1394885  | 1 | 99,540,210  | C | G | 0.7857 | 0.0062  | 0.0013 | 1.36E-06 |
| rs12028526 | 1 | 101,013,734 | T | G | 0.5576 | 0.0071  | 0.0011 | 1.50E-11 |
| rs17125616 | 1 | 102,329,484 | T | C | 0.4961 | 0.0040  | 0.0010 | 1.15E-04 |
| rs10047094 | 1 | 102,816,869 | C | G | 0.7345 | -0.0056 | 0.0012 | 1.97E-06 |
| rs9663072  | 1 | 103,588,507 | A | G | 0.6985 | -0.0067 | 0.0011 | 5.08E-09 |
| rs7544544  | 1 | 105,842,991 | A | C | 0.6316 | 0.0081  | 0.0011 | 6.41E-14 |
| rs1888181  | 1 | 106,860,057 | T | C | 0.5487 | -0.0072 | 0.0011 | 7.41E-12 |
| rs13884194 | 1 | 106,922,293 | A | C | 0.0099 | 0.0194  | 0.0054 | 3.22E-04 |
| rs7549469  | 1 | 107,304,576 | A | T | 0.6796 | 0.0089  | 0.0011 | 1.96E-15 |
| rs2878349  | 1 | 107,549,245 | A | G | 0.3317 | -0.0100 | 0.0011 | 2.01E-19 |
| rs11185112 | 1 | 107,964,274 | T | G | 0.5122 | -0.0041 | 0.0010 | 9.90E-05 |

|             |   |             |   |   |        |         |        |          |
|-------------|---|-------------|---|---|--------|---------|--------|----------|
| rs610219    | 1 | 108,076,721 | A | G | 0.6727 | 0.0042  | 0.0011 | 1.79E-04 |
| rs14184     | 1 | 110,047,110 | C | G | 0.7007 | -0.0134 | 0.0011 | 6.96E-32 |
| rs10745307  | 1 | 110,580,215 | A | G | 0.5474 | -0.0107 | 0.0011 | 2.85E-24 |
| rs77052120  | 1 | 110,765,398 | T | C | 0.0998 | -0.0156 | 0.0018 | 4.85E-19 |
| rs4839343   | 1 | 110,886,773 | C | G | 0.5397 | -0.0060 | 0.0010 | 9.11E-09 |
| rs1047401   | 1 | 112,259,272 | T | C | 0.8318 | 0.0089  | 0.0014 | 2.20E-10 |
| rs197420    | 1 | 112,317,196 | C | G | 0.2144 | -0.0095 | 0.0013 | 8.67E-14 |
| rs12033257  | 1 | 112,318,484 | A | G | 0.6175 | -0.0081 | 0.0011 | 7.13E-14 |
| rs3121984   | 1 | 112,815,880 | T | C | 0.6900 | 0.0096  | 0.0011 | 2.75E-17 |
| rs2999158   | 1 | 113,239,478 | T | C | 0.3324 | 0.0084  | 0.0011 | 4.89E-14 |
| rs33965092  | 1 | 114,377,227 | A | C | 0.0310 | -0.0261 | 0.0030 | 7.99E-18 |
| rs10732635  | 1 | 114,519,351 | T | G | 0.5597 | 0.0070  | 0.0011 | 3.77E-11 |
| rs149078852 | 1 | 114,548,082 | A | G | 0.0014 | -0.0468 | 0.0161 | 3.68E-03 |
| rs72692054  | 1 | 114,702,261 | A | G | 0.8890 | 0.0090  | 0.0017 | 6.99E-08 |
| rs116470470 | 1 | 115,163,872 | T | C | 0.9434 | -0.0118 | 0.0023 | 1.89E-07 |
| rs2224086   | 1 | 115,309,590 | A | C | 0.7416 | 0.0066  | 0.0012 | 3.58E-08 |
| rs2016890   | 1 | 115,674,621 | T | C | 0.3770 | -0.0029 | 0.0011 | 7.60E-03 |
| rs72699131  | 1 | 117,527,152 | A | T | 0.7084 | -0.0038 | 0.0012 | 1.04E-03 |
| rs1290552   | 1 | 118,054,772 | T | G | 0.7629 | -0.0099 | 0.0012 | 6.14E-16 |
| rs12139450  | 1 | 118,293,350 | T | C | 0.8853 | -0.0055 | 0.0017 | 8.12E-04 |
| rs12402787  | 1 | 145,609,971 | T | C | 0.6373 | -0.0062 | 0.0011 | 1.18E-08 |
| rs61841669  | 1 | 146,610,492 | T | C | 0.0203 | 0.0127  | 0.0038 | 8.54E-04 |
| rs77944781  | 1 | 147,035,252 | A | T | 0.0309 | -0.0149 | 0.0031 | 1.00E-06 |
| rs35786175  | 1 | 149,951,467 | T | G | 0.0765 | 0.0115  | 0.0020 | 9.50E-09 |
| rs11204779  | 1 | 151,074,626 | A | G | 0.7770 | 0.0080  | 0.0013 | 2.47E-10 |
| rs9436029   | 1 | 151,367,378 | T | C | 0.1104 | -0.0091 | 0.0017 | 5.71E-08 |
| rs2017850   | 1 | 151,715,279 | T | C | 0.3475 | 0.0095  | 0.0011 | 5.75E-18 |
| rs74844193  | 1 | 153,615,820 | A | G | 0.0161 | -0.0295 | 0.0050 | 2.93E-09 |
| rs112780312 | 1 | 153,797,015 | A | G | 0.2863 | -0.0096 | 0.0012 | 1.10E-16 |
| rs4845368   | 1 | 154,255,973 | T | C | 0.4092 | -0.0023 | 0.0011 | 3.36E-02 |
| rs12743874  | 1 | 154,257,188 | A | T | 0.7183 | -0.0103 | 0.0012 | 2.10E-18 |
| rs11586348  | 1 | 154,819,359 | A | C | 0.6589 | 0.0085  | 0.0011 | 1.60E-14 |
| rs675661    | 1 | 156,087,206 | A | G | 0.9497 | -0.0117 | 0.0024 | 1.16E-06 |
| rs75160483  | 1 | 156,238,735 | T | C | 0.0253 | -0.0236 | 0.0034 | 1.97E-12 |
| rs863006    | 1 | 159,177,748 | A | G | 0.5624 | -0.0098 | 0.0011 | 1.31E-20 |
| rs1934074   | 1 | 159,897,388 | T | C | 0.3716 | 0.0055  | 0.0011 | 4.34E-07 |
| rs17846717  | 1 | 160,109,636 | C | G | 0.8650 | -0.0064 | 0.0015 | 3.41E-05 |
| rs685       | 1 | 161,191,522 | A | G | 0.7742 | -0.0078 | 0.0013 | 4.75E-10 |
| rs115032752 | 1 | 161,451,118 | T | C | 0.9197 | 0.0127  | 0.0019 | 4.23E-11 |
| rs80159981  | 1 | 162,332,368 | T | C | 0.8576 | 0.0092  | 0.0015 | 8.30E-10 |
| rs79571229  | 1 | 162,661,893 | A | G | 0.0089 | -0.0198 | 0.0058 | 6.01E-04 |
| rs1934518   | 1 | 163,485,064 | A | G | 0.5450 | -0.0048 | 0.0011 | 5.02E-06 |
| rs1289020   | 1 | 163,667,287 | A | G | 0.5891 | -0.0073 | 0.0011 | 5.87E-12 |
| rs12132049  | 1 | 164,181,663 | T | C | 0.0572 | 0.0111  | 0.0023 | 8.71E-07 |
| rs1038980   | 1 | 165,112,096 | A | C | 0.7273 | -0.0051 | 0.0012 | 1.57E-05 |
| rs1857947   | 1 | 165,285,370 | T | G | 0.0646 | -0.0097 | 0.0021 | 5.56E-06 |
| rs12065238  | 1 | 166,101,602 | A | G | 0.1696 | 0.0101  | 0.0014 | 4.57E-13 |
| rs1027351   | 1 | 166,447,321 | A | G | 0.7993 | -0.0043 | 0.0013 | 8.78E-04 |

|             |   |             |   |   |        |         |        |          |
|-------------|---|-------------|---|---|--------|---------|--------|----------|
| rs189707046 | 1 | 169,160,349 | A | C | 0.3983 | 0.0093  | 0.0012 | 6.83E-14 |
| rs2420016   | 1 | 169,261,356 | A | G | 0.3576 | 0.0094  | 0.0011 | 7.31E-18 |
| rs10919252  | 1 | 169,802,956 | C | G | 0.6737 | -0.0056 | 0.0011 | 4.78E-07 |
| rs35041900  | 1 | 171,451,621 | T | C | 0.0907 | -0.0155 | 0.0018 | 1.61E-17 |
| rs12146022  | 1 | 171,451,959 | A | T | 0.1666 | 0.0079  | 0.0014 | 1.92E-08 |
| rs6669168   | 1 | 171,460,027 | A | T | 0.8656 | -0.0084 | 0.0015 | 3.76E-08 |
| rs3817923   | 1 | 171,809,211 | A | G | 0.1132 | -0.0113 | 0.0017 | 8.67E-12 |
| rs12088073  | 1 | 174,497,642 | A | C | 0.5378 | -0.0141 | 0.0011 | 1.21E-40 |
| rs7550448   | 1 | 174,974,939 | A | G | 0.2241 | 0.0030  | 0.0013 | 1.74E-02 |
| rs565960    | 1 | 175,850,823 | T | C | 0.7114 | 0.0087  | 0.0012 | 3.75E-14 |
| rs2072934   | 1 | 176,851,548 | A | C | 0.0882 | -0.0095 | 0.0018 | 2.74E-07 |
| rs7556635   | 1 | 177,525,993 | T | C | 0.3216 | -0.0062 | 0.0011 | 3.29E-08 |
| rs3117755   | 1 | 177,701,056 | A | C | 0.6979 | -0.0056 | 0.0011 | 9.41E-07 |
| rs10913420  | 1 | 177,759,645 | T | C | 0.1726 | 0.0093  | 0.0014 | 1.66E-11 |
| rs13306731  | 1 | 179,320,578 | A | G | 0.9263 | -0.0104 | 0.0020 | 2.09E-07 |
| rs10914136  | 1 | 180,896,930 | C | G | 0.5381 | -0.0077 | 0.0011 | 2.01E-13 |
| rs4652548   | 1 | 180,954,130 | T | C | 0.5889 | 0.0080  | 0.0011 | 3.93E-14 |
| rs192772311 | 1 | 181,286,663 | T | C | 0.0046 | -0.0391 | 0.0080 | 9.41E-07 |
| rs11801667  | 1 | 181,498,421 | T | C | 0.3119 | 0.0075  | 0.0011 | 2.61E-11 |
| rs35742190  | 1 | 183,679,666 | T | G | 0.4867 | 0.0073  | 0.0010 | 2.50E-12 |
| rs12126231  | 1 | 184,698,816 | A | G | 0.6159 | 0.0117  | 0.0011 | 9.70E-28 |
| rs1390496   | 1 | 187,276,553 | A | G | 0.2588 | 0.0059  | 0.0012 | 8.09E-07 |
| rs1502595   | 1 | 189,550,729 | A | G | 0.5178 | 0.0068  | 0.0010 | 6.56E-11 |
| rs75793314  | 1 | 190,039,966 | A | G | 0.0252 | 0.0133  | 0.0034 | 1.20E-04 |
| rs61818779  | 1 | 190,319,316 | A | G | 0.7887 | -0.0104 | 0.0013 | 6.35E-16 |
| rs11577349  | 1 | 190,371,671 | A | G | 0.1767 | 0.0043  | 0.0014 | 1.61E-03 |
| rs12047108  | 1 | 191,490,610 | T | C | 0.8953 | 0.0105  | 0.0017 | 8.97E-10 |
| rs10921229  | 1 | 192,625,032 | C | G | 0.4416 | 0.0066  | 0.0011 | 2.99E-10 |
| rs17613936  | 1 | 193,938,169 | A | T | 0.8462 | -0.0078 | 0.0015 | 9.91E-08 |
| rs12132767  | 1 | 194,500,495 | A | G | 0.1030 | 0.0074  | 0.0017 | 1.67E-05 |
| rs2989975   | 1 | 195,753,448 | T | C | 0.5052 | 0.0054  | 0.0010 | 2.74E-07 |
| rs12144060  | 1 | 196,116,663 | A | C | 0.8009 | 0.0077  | 0.0013 | 3.95E-09 |
| rs2488401   | 1 | 197,702,401 | T | C | 0.2055 | -0.0108 | 0.0013 | 1.35E-16 |
| rs10922300  | 1 | 197,814,685 | T | C | 0.1677 | 0.0090  | 0.0014 | 1.22E-10 |
| rs10919665  | 1 | 199,365,630 | C | G | 0.2098 | -0.0077 | 0.0013 | 2.27E-09 |
| rs1337731   | 1 | 199,444,151 | A | G | 0.3344 | 0.0086  | 0.0011 | 7.07E-15 |
| rs374827    | 1 | 200,874,327 | T | C | 0.4936 | 0.0060  | 0.0010 | 1.14E-08 |
| rs10920254  | 1 | 201,767,474 | C | G | 0.3563 | 0.0103  | 0.0011 | 3.75E-21 |
| rs9660693   | 1 | 203,923,404 | T | C | 0.5522 | 0.0062  | 0.0011 | 3.60E-09 |
| rs3747631   | 1 | 204,587,569 | C | G | 0.2148 | 0.0204  | 0.0013 | 7.17E-58 |
| rs16854920  | 1 | 204,966,170 | T | C | 0.6632 | -0.0083 | 0.0011 | 5.71E-14 |
| rs192587581 | 1 | 205,212,987 | A | G | 0.0098 | -0.0279 | 0.0054 | 2.16E-07 |
| rs11578181  | 1 | 208,323,140 | T | G | 0.6944 | -0.0075 | 0.0011 | 3.40E-11 |
| rs12059203  | 1 | 209,635,861 | A | G | 0.8361 | 0.0062  | 0.0014 | 1.30E-05 |
| rs12045428  | 1 | 210,351,222 | A | C | 0.1881 | -0.0106 | 0.0013 | 2.76E-15 |
| rs12071309  | 1 | 210,585,013 | T | C | 0.6804 | -0.0062 | 0.0011 | 3.83E-08 |
| rs1890846   | 1 | 210,910,268 | T | G | 0.5491 | -0.0076 | 0.0011 | 6.37E-13 |
| rs34440485  | 1 | 211,549,553 | T | C | 0.1643 | -0.0123 | 0.0014 | 2.57E-18 |

|             |    |             |   |   |        |         |        |          |
|-------------|----|-------------|---|---|--------|---------|--------|----------|
| rs12064553  | 1  | 212,397,008 | A | T | 0.2278 | 0.0093  | 0.0012 | 9.14E-14 |
| rs190319273 | 1  | 212,819,321 | A | G | 0.0084 | -0.0298 | 0.0059 | 3.63E-07 |
| rs72743993  | 1  | 213,079,861 | C | G | 0.2981 | -0.0060 | 0.0011 | 1.45E-07 |
| rs1187769   | 1  | 213,514,236 | T | C | 0.2248 | -0.0077 | 0.0013 | 7.00E-10 |
| rs10157166  | 1  | 214,484,950 | T | C | 0.4028 | -0.0076 | 0.0011 | 1.00E-12 |
| rs148688785 | 1  | 217,685,863 | A | G | 0.0153 | 0.0207  | 0.0043 | 1.49E-06 |
| rs7543828   | 1  | 220,425,914 | T | C | 0.1714 | 0.0105  | 0.0014 | 5.08E-14 |
| rs4846724   | 1  | 221,967,817 | A | G | 0.5326 | 0.0077  | 0.0010 | 2.62E-13 |
| rs7514140   | 1  | 224,312,130 | C | G | 0.9614 | 0.0138  | 0.0027 | 4.28E-07 |
| rs9804142   | 1  | 225,673,847 | T | C | 0.6984 | 0.0073  | 0.0011 | 1.82E-10 |
| rs114312101 | 1  | 227,303,589 | A | T | 0.0650 | -0.0115 | 0.0021 | 6.81E-08 |
| rs2895927   | 1  | 230,182,053 | T | G | 0.7866 | 0.0076  | 0.0013 | 2.56E-09 |
| rs7543410   | 1  | 232,618,155 | T | G | 0.2422 | 0.0072  | 0.0012 | 3.60E-09 |
| rs1329125   | 1  | 234,740,880 | T | C | 0.3254 | -0.0124 | 0.0011 | 1.06E-28 |
| rs12131823  | 1  | 235,554,749 | A | G | 0.5374 | 0.0103  | 0.0011 | 1.18E-22 |
| rs918241    | 1  | 237,420,086 | A | C | 0.4856 | 0.0055  | 0.0010 | 1.45E-07 |
| rs12725303  | 1  | 237,752,694 | A | G | 0.5119 | 0.0068  | 0.0010 | 8.60E-11 |
| rs171881    | 1  | 241,032,670 | A | T | 0.2675 | 0.0057  | 0.0012 | 1.29E-06 |
| rs10802932  | 1  | 241,353,614 | T | C | 0.4602 | -0.0062 | 0.0011 | 3.79E-09 |
| rs628720    | 1  | 241,806,189 | T | C | 0.6340 | -0.0091 | 0.0011 | 3.90E-17 |
| rs12569163  | 1  | 241,878,547 | T | G | 0.7883 | -0.0123 | 0.0018 | 1.69E-11 |
| rs7523793   | 1  | 242,253,024 | T | C | 0.6384 | 0.0078  | 0.0011 | 8.37E-13 |
| rs2275154   | 1  | 243,433,654 | A | G | 0.6708 | 0.0156  | 0.0011 | 1.66E-44 |
| rs320323    | 1  | 243,752,002 | T | C | 0.8637 | 0.0146  | 0.0015 | 1.31E-21 |
| rs10927053  | 1  | 243,811,321 | A | T | 0.8944 | -0.0173 | 0.0017 | 3.02E-24 |
| rs78831166  | 1  | 244,269,227 | A | G | 0.0546 | 0.0135  | 0.0023 | 5.69E-09 |
| rs515513    | 1  | 244,448,353 | A | C | 0.5332 | -0.0087 | 0.0011 | 1.17E-16 |
| rs6051439   | 20 | 2,834,433   | T | C | 0.3474 | 0.0069  | 0.0011 | 4.15E-10 |
| rs2422859   | 20 | 3,132,828   | T | G | 0.5221 | -0.0058 | 0.0010 | 2.42E-08 |
| rs2208029   | 20 | 3,314,702   | T | C | 0.4819 | 0.0059  | 0.0010 | 1.96E-08 |
| rs35273008  | 20 | 3,633,221   | A | T | 0.9841 | 0.0189  | 0.0042 | 7.04E-06 |
| rs708912    | 20 | 8,403,550   | T | C | 0.7921 | 0.0104  | 0.0013 | 9.00E-16 |
| rs6078382   | 20 | 11,883,794  | A | C | 0.3985 | 0.0058  | 0.0011 | 5.68E-08 |
| rs6079462   | 20 | 14,466,997  | T | G | 0.7984 | -0.0101 | 0.0013 | 1.26E-14 |
| rs4141463   | 20 | 14,747,471  | T | C | 0.4176 | -0.0086 | 0.0011 | 3.90E-16 |
| rs6043521   | 20 | 15,739,745  | T | C | 0.6007 | -0.0065 | 0.0011 | 9.84E-10 |
| rs6044142   | 20 | 16,559,255  | A | G | 0.5694 | -0.0074 | 0.0011 | 2.65E-12 |
| rs2068078   | 20 | 16,947,769  | T | G | 0.7882 | -0.0083 | 0.0013 | 7.14E-11 |
| rs6034829   | 20 | 17,424,509  | T | C | 0.1784 | 0.0094  | 0.0014 | 5.62E-12 |
| rs806768    | 20 | 17,814,600  | A | G | 0.6103 | -0.0057 | 0.0011 | 9.13E-08 |
| rs6045213   | 20 | 18,120,208  | A | G | 0.6672 | 0.0059  | 0.0011 | 1.33E-07 |
| rs6035413   | 20 | 19,674,512  | A | T | 0.6516 | -0.0088 | 0.0011 | 9.48E-16 |
| rs4815005   | 20 | 20,893,309  | T | C | 0.1742 | 0.0073  | 0.0014 | 1.47E-07 |
| rs6035877   | 20 | 21,512,532  | A | C | 0.5342 | 0.0072  | 0.0010 | 6.26E-12 |
| rs4813456   | 20 | 22,308,161  | C | G | 0.3705 | 0.0076  | 0.0011 | 1.78E-12 |
| rs2567608   | 20 | 23,017,082  | T | C | 0.5463 | -0.0065 | 0.0011 | 6.48E-10 |
| rs4813529   | 20 | 24,691,928  | T | G | 0.3283 | -0.0075 | 0.0011 | 2.03E-11 |
| rs6141759   | 20 | 31,177,292  | A | G | 0.2372 | -0.0106 | 0.0012 | 6.50E-18 |



|             |    |            |   |   |        |         |        |          |
|-------------|----|------------|---|---|--------|---------|--------|----------|
| rs202224508 | 20 | 31,342,066 | T | C | 0.2304 | -0.0121 | 0.0014 | 4.40E-17 |
| rs4911257   | 20 | 31,359,574 | T | C | 0.6131 | 0.0098  | 0.0011 | 7.96E-20 |
| rs6059989   | 20 | 33,279,604 | A | G | 0.5352 | -0.0081 | 0.0010 | 1.37E-14 |
| rs112579094 | 20 | 34,530,095 | T | C | 0.0724 | 0.0142  | 0.0020 | 2.50E-12 |
| rs76212001  | 20 | 39,670,354 | T | C | 0.0787 | -0.0101 | 0.0019 | 1.97E-07 |
| rs188339128 | 20 | 39,691,791 | T | C | 0.0111 | -0.0334 | 0.0050 | 2.70E-11 |
| rs62208714  | 20 | 40,905,826 | T | C | 0.0672 | -0.0098 | 0.0021 | 2.70E-06 |
| rs6093705   | 20 | 41,257,630 | A | C | 0.6805 | 0.0095  | 0.0011 | 1.89E-17 |
| rs1006749   | 20 | 41,716,653 | A | G | 0.5199 | 0.0063  | 0.0011 | 2.04E-09 |
| rs4812671   | 20 | 41,761,291 | A | T | 0.5758 | 0.0061  | 0.0011 | 7.80E-09 |
| rs6130354   | 20 | 41,978,786 | T | G | 0.8639 | -0.0109 | 0.0015 | 1.14E-12 |
| rs6030819   | 20 | 42,016,041 | A | T | 0.1958 | -0.0114 | 0.0013 | 6.12E-18 |
| rs9875      | 20 | 42,825,487 | T | C | 0.6886 | -0.0069 | 0.0011 | 8.29E-10 |
| rs7271519   | 20 | 43,626,696 | T | C | 0.6910 | 0.0098  | 0.0011 | 4.93E-18 |
| rs3092073   | 20 | 44,595,649 | A | G | 0.4573 | -0.0071 | 0.0011 | 1.25E-11 |
| rs56374036  | 20 | 46,367,372 | A | G | 0.7872 | -0.0088 | 0.0013 | 8.70E-12 |
| rs6122735   | 20 | 47,523,732 | T | C | 0.3927 | 0.0073  | 0.0011 | 7.10E-12 |
| rs6020560   | 20 | 49,119,419 | T | C | 0.5245 | -0.0096 | 0.0010 | 6.94E-20 |
| rs230009    | 20 | 49,734,175 | A | G | 0.4113 | 0.0073  | 0.0011 | 5.04E-12 |
| rs6068200   | 20 | 51,072,377 | A | G | 0.3828 | 0.0073  | 0.0011 | 1.38E-11 |
| rs6063897   | 20 | 51,606,879 | C | G | 0.2431 | -0.0097 | 0.0012 | 2.09E-15 |
| rs1606263   | 20 | 53,487,470 | T | C | 0.3110 | -0.0092 | 0.0011 | 4.64E-16 |
| rs6024420   | 20 | 54,371,100 | T | C | 0.3061 | -0.0070 | 0.0011 | 8.71E-10 |
| rs77901523  | 20 | 55,533,146 | C | G | 0.0345 | 0.0194  | 0.0029 | 1.29E-11 |
| rs6070254   | 20 | 56,336,730 | A | T | 0.6747 | 0.0070  | 0.0011 | 3.67E-10 |
| rs7261037   | 20 | 58,196,703 | A | C | 0.9578 | 0.0185  | 0.0026 | 1.34E-12 |
| rs860973    | 20 | 58,247,236 | T | C | 0.1846 | 0.0100  | 0.0014 | 1.48E-13 |
| rs1182532   | 20 | 58,393,545 | A | C | 0.1549 | 0.0111  | 0.0015 | 4.00E-14 |
| rs2224427   | 20 | 58,736,133 | A | G | 0.4712 | -0.0072 | 0.0010 | 6.21E-12 |
| rs6027503   | 20 | 58,893,584 | C | G | 0.5689 | -0.0081 | 0.0011 | 2.56E-14 |
| rs6128812   | 20 | 58,992,369 | T | C | 0.8170 | -0.0079 | 0.0014 | 4.85E-09 |
| rs6027896   | 20 | 59,454,810 | T | C | 0.6717 | 0.0074  | 0.0011 | 3.73E-11 |
| rs4812281   | 20 | 59,794,157 | T | C | 0.7402 | 0.0154  | 0.0012 | 3.74E-38 |
| rs6028084   | 20 | 59,838,105 | T | C | 0.6106 | 0.0151  | 0.0011 | 3.44E-45 |
| rs3761226   | 20 | 60,811,072 | A | C | 0.4857 | -0.0063 | 0.0010 | 1.98E-09 |
| rs16983844  | 20 | 62,225,508 | A | G | 0.2089 | 0.0107  | 0.0013 | 7.86E-17 |
| rs6122051   | 20 | 62,714,026 | T | C | 0.2700 | -0.0082 | 0.0012 | 5.72E-12 |
| rs77149260  | 20 | 62,860,034 | A | G | 0.1233 | 0.0089  | 0.0016 | 2.55E-08 |
| rs2824194   | 21 | 18,422,045 | A | T | 0.5035 | 0.0073  | 0.0010 | 3.97E-12 |
| rs1389997   | 21 | 19,046,075 | T | G | 0.3238 | 0.0079  | 0.0011 | 1.50E-12 |
| rs28807201  | 21 | 20,044,236 | T | C | 0.6998 | -0.0114 | 0.0011 | 1.97E-23 |
| rs2824999   | 21 | 20,060,670 | T | C | 0.7304 | -0.0090 | 0.0012 | 1.98E-14 |
| rs73224350  | 21 | 22,288,653 | A | G | 0.8618 | 0.0098  | 0.0015 | 1.33E-10 |
| rs232464    | 21 | 22,695,321 | T | C | 0.2226 | 0.0092  | 0.0013 | 2.91E-13 |
| rs207488    | 21 | 25,213,719 | A | G | 0.8177 | 0.0073  | 0.0014 | 7.51E-08 |
| rs55745100  | 21 | 33,016,364 | T | C | 0.9462 | -0.0140 | 0.0023 | 1.65E-09 |
| rs71321400  | 21 | 33,103,158 | A | G | 0.1279 | -0.0099 | 0.0016 | 2.69E-10 |
| rs12627339  | 21 | 34,279,201 | A | T | 0.6982 | 0.0098  | 0.0011 | 9.96E-18 |

|             |    |            |   |   |        |         |        |          |
|-------------|----|------------|---|---|--------|---------|--------|----------|
| rs11701924  | 21 | 34,468,489 | T | C | 0.7370 | -0.0079 | 0.0012 | 2.69E-11 |
| rs62227705  | 21 | 34,919,593 | A | C | 0.7158 | 0.0074  | 0.0012 | 1.94E-10 |
| rs2298679   | 21 | 35,247,460 | T | C | 0.2051 | -0.0098 | 0.0013 | 4.21E-14 |
| rs75877036  | 21 | 35,847,890 | A | T | 0.9422 | -0.0145 | 0.0022 | 1.11E-10 |
| rs9984313   | 21 | 39,193,774 | T | C | 0.7582 | -0.0078 | 0.0012 | 1.65E-10 |
| rs7280000   | 21 | 39,598,054 | C | G | 0.4172 | 0.0084  | 0.0011 | 1.92E-15 |
| rs4818226   | 21 | 42,633,065 | A | G | 0.3202 | 0.0112  | 0.0011 | 1.51E-23 |
| rs9976560   | 21 | 44,038,275 | C | G | 0.7497 | 0.0085  | 0.0012 | 2.66E-12 |
| rs9977825   | 21 | 46,494,995 | T | C | 0.3630 | -0.0099 | 0.0011 | 8.47E-20 |
| rs744507    | 21 | 47,051,787 | C | G | 0.6274 | -0.0074 | 0.0011 | 1.04E-11 |
| rs74323354  | 21 | 47,843,163 | A | G | 0.9268 | 0.0112  | 0.0020 | 2.53E-08 |
| rs2535692   | 22 | 18,157,282 | A | G | 0.2731 | 0.0069  | 0.0012 | 5.17E-09 |
| rs419438    | 22 | 20,166,723 | T | G | 0.5395 | -0.0071 | 0.0011 | 1.41E-11 |
| rs654880    | 22 | 20,946,457 | A | G | 0.2224 | -0.0084 | 0.0013 | 2.36E-11 |
| rs3788337   | 22 | 23,412,017 | A | G | 0.3666 | 0.0068  | 0.0011 | 5.07E-10 |
| rs2142840   | 22 | 25,507,595 | C | G | 0.3145 | -0.0064 | 0.0011 | 1.26E-08 |
| rs79020347  | 22 | 27,591,220 | T | C | 0.0196 | -0.0215 | 0.0038 | 1.44E-08 |
| rs2065057   | 22 | 27,975,321 | A | T | 0.7055 | 0.0082  | 0.0011 | 7.97E-13 |
| rs134545    | 22 | 28,799,080 | T | C | 0.6426 | -0.0080 | 0.0011 | 2.38E-13 |
| rs2301586   | 22 | 29,702,910 | A | T | 0.6474 | -0.0071 | 0.0011 | 9.63E-11 |
| rs2530661   | 22 | 30,024,263 | T | C | 0.4683 | 0.0110  | 0.0010 | 7.37E-26 |
| rs737945    | 22 | 30,202,774 | C | G | 0.4466 | -0.0122 | 0.0011 | 3.53E-31 |
| rs2413005   | 22 | 31,405,191 | T | C | 0.3118 | 0.0081  | 0.0011 | 6.39E-13 |
| rs4821186   | 22 | 34,217,224 | T | C | 0.2807 | -0.0046 | 0.0012 | 8.04E-05 |
| rs738988    | 22 | 34,289,025 | A | G | 0.7149 | -0.0160 | 0.0012 | 1.36E-43 |
| rs16993330  | 22 | 34,343,697 | A | C | 0.0587 | -0.0240 | 0.0022 | 6.06E-27 |
| rs11703948  | 22 | 38,817,047 | A | G | 0.9047 | -0.0146 | 0.0018 | 2.97E-16 |
| rs79157023  | 22 | 39,154,316 | T | C | 0.9474 | -0.0103 | 0.0024 | 1.41E-05 |
| rs77516118  | 22 | 39,647,168 | T | C | 0.7454 | -0.0093 | 0.0012 | 1.01E-14 |
| rs12170452  | 22 | 40,019,773 | A | G | 0.4445 | 0.0103  | 0.0011 | 9.16E-23 |
| rs41311445  | 22 | 42,070,374 | A | C | 0.9010 | 0.0127  | 0.0018 | 5.19E-13 |
| rs133351    | 22 | 42,431,246 | T | G | 0.3968 | -0.0060 | 0.0011 | 1.74E-08 |
| rs137121    | 22 | 43,013,554 | T | C | 0.1270 | 0.0127  | 0.0016 | 8.12E-16 |
| rs5759006   | 22 | 43,273,740 | C | G | 0.5188 | 0.0082  | 0.0010 | 5.08E-15 |
| rs8136156   | 22 | 43,309,509 | A | G | 0.5534 | 0.0079  | 0.0012 | 7.92E-12 |
| rs5765717   | 22 | 44,917,646 | T | G | 0.4867 | -0.0072 | 0.0010 | 4.66E-12 |
| rs9626920   | 22 | 46,428,993 | A | G | 0.4113 | 0.0064  | 0.0011 | 2.32E-09 |
| rs710124    | 22 | 47,080,465 | T | C | 0.6301 | 0.0055  | 0.0011 | 3.84E-07 |
| rs801652    | 22 | 47,202,691 | T | C | 0.7286 | 0.0081  | 0.0012 | 5.55E-12 |
| rs142237780 | 22 | 48,030,529 | T | C | 0.0368 | 0.0176  | 0.0028 | 4.77E-10 |
| rs5768157   | 22 | 48,315,016 | A | G | 0.6631 | 0.0067  | 0.0011 | 1.47E-09 |
| rs971136    | 22 | 48,438,408 | A | G | 0.6220 | -0.0089 | 0.0011 | 2.21E-16 |
| rs2338719   | 22 | 48,879,639 | T | C | 0.3413 | 0.0084  | 0.0011 | 2.83E-14 |
| rs11541025  | 22 | 50,354,819 | A | C | 0.3130 | 0.0058  | 0.0012 | 4.46E-07 |
| rs5771204   | 22 | 50,614,476 | T | C | 0.5802 | 0.0067  | 0.0011 | 2.48E-10 |
| rs1024374   | 22 | 51,149,320 | C | G | 0.5398 | 0.0098  | 0.0011 | 2.05E-20 |
| rs10519486  | 2  | 1,788,847  | A | G | 0.2294 | 0.0022  | 0.0012 | 7.24E-02 |
| rs6737433   | 2  | 1,903,987  | C | G | 0.7747 | 0.0095  | 0.0013 | 4.56E-14 |

|             |   |            |   |   |        |         |        |          |
|-------------|---|------------|---|---|--------|---------|--------|----------|
| rs11686212  | 2 | 3,392,295  | A | G | 0.6288 | -0.0077 | 0.0011 | 1.59E-12 |
| rs9789761   | 2 | 3,841,136  | T | C | 0.1077 | 0.0070  | 0.0017 | 3.03E-05 |
| rs71449692  | 2 | 3,879,359  | A | G | 0.9779 | -0.0088 | 0.0037 | 1.71E-02 |
| rs2218006   | 2 | 4,124,058  | A | G | 0.6006 | -0.0056 | 0.0011 | 1.77E-07 |
| rs669952    | 2 | 4,563,477  | A | G | 0.1875 | 0.0078  | 0.0013 | 6.31E-09 |
| rs17581422  | 2 | 4,825,542  | T | C | 0.2224 | 0.0146  | 0.0013 | 3.12E-31 |
| rs7603132   | 2 | 4,951,548  | A | G | 0.1897 | 0.0173  | 0.0013 | 2.70E-38 |
| rs1453768   | 2 | 5,390,932  | A | G | 0.3824 | 0.0061  | 0.0011 | 1.23E-08 |
| rs73914230  | 2 | 5,829,704  | A | G | 0.9638 | 0.0230  | 0.0028 | 2.84E-16 |
| rs114244805 | 2 | 5,834,493  | T | C | 0.9625 | 0.0091  | 0.0028 | 1.13E-03 |
| rs4322814   | 2 | 5,847,675  | A | G | 0.1926 | -0.0065 | 0.0013 | 1.01E-06 |
| rs10186870  | 2 | 6,712,550  | T | G | 0.6013 | -0.0060 | 0.0011 | 1.91E-08 |
| rs10929474  | 2 | 7,377,513  | A | T | 0.2135 | 0.0114  | 0.0013 | 5.12E-19 |
| rs6760539   | 2 | 7,437,313  | A | G | 0.3046 | 0.0092  | 0.0011 | 5.35E-16 |
| rs35739581  | 2 | 8,088,520  | T | C | 0.9179 | 0.0130  | 0.0020 | 3.78E-11 |
| rs76076331  | 2 | 10,977,585 | T | C | 0.1299 | 0.0221  | 0.0016 | 1.54E-45 |
| rs4669646   | 2 | 11,061,715 | A | G | 0.0298 | 0.0137  | 0.0031 | 8.10E-06 |
| rs72779901  | 2 | 12,365,236 | A | C | 0.0832 | 0.0088  | 0.0019 | 3.69E-06 |
| rs72779695  | 2 | 12,797,853 | T | C | 0.1181 | -0.0140 | 0.0016 | 7.03E-18 |
| rs2459338   | 2 | 13,050,027 | A | G | 0.4840 | 0.0077  | 0.0010 | 1.83E-13 |
| rs13017679  | 2 | 13,660,299 | A | T | 0.6565 | -0.0061 | 0.0011 | 2.80E-08 |
| rs12615825  | 2 | 15,462,120 | T | C | 0.7748 | -0.0077 | 0.0013 | 9.96E-10 |
| rs11096574  | 2 | 16,644,988 | T | G | 0.2677 | 0.0090  | 0.0012 | 2.83E-14 |
| rs312961    | 2 | 21,349,199 | T | C | 0.6282 | -0.0044 | 0.0011 | 5.03E-05 |
| rs6738860   | 2 | 22,442,099 | A | T | 0.4539 | -0.0094 | 0.0011 | 4.66E-19 |
| rs13030436  | 2 | 23,301,140 | T | C | 0.4340 | 0.0079  | 0.0011 | 8.77E-14 |
| rs12986598  | 2 | 23,633,170 | T | G | 0.2712 | -0.0050 | 0.0012 | 2.05E-05 |
| rs2176263   | 2 | 24,092,773 | C | G | 0.6043 | 0.0070  | 0.0011 | 8.59E-11 |
| rs17763463  | 2 | 24,256,071 | T | C | 0.9029 | 0.0104  | 0.0018 | 3.42E-09 |
| rs183720801 | 2 | 25,427,592 | A | G | 0.0294 | -0.0044 | 0.0031 | 1.61E-01 |
| rs11681881  | 2 | 25,444,521 | A | G | 0.8651 | -0.0103 | 0.0015 | 2.78E-11 |
| rs192230289 | 2 | 25,454,104 | T | C | 0.0171 | -0.0266 | 0.0041 | 5.24E-11 |
| rs555621092 | 2 | 26,923,070 | A | G | 0.0051 | -0.0359 | 0.0078 | 3.89E-06 |
| rs183231865 | 2 | 27,366,299 | T | G | 0.9909 | -0.0263 | 0.0057 | 3.93E-06 |
| rs188743186 | 2 | 27,561,317 | A | G | 0.1819 | -0.0075 | 0.0016 | 1.77E-06 |
| rs780110    | 2 | 27,685,388 | A | G | 0.4336 | -0.0090 | 0.0011 | 4.61E-15 |
| rs7600066   | 2 | 28,432,793 | T | C | 0.1935 | -0.0102 | 0.0013 | 1.46E-14 |
| rs7585998   | 2 | 28,584,077 | C | G | 0.2553 | -0.0030 | 0.0012 | 1.17E-02 |
| rs56178008  | 2 | 29,098,543 | A | T | 0.4315 | 0.0097  | 0.0011 | 3.70E-20 |
| rs12996631  | 2 | 29,572,299 | A | G | 0.6043 | -0.0060 | 0.0011 | 2.21E-08 |
| rs13017699  | 2 | 30,376,345 | A | T | 0.5636 | 0.0061  | 0.0011 | 8.28E-09 |
| rs7594102   | 2 | 31,219,424 | A | C | 0.6717 | -0.0049 | 0.0011 | 1.15E-05 |
| rs4630806   | 2 | 31,292,715 | T | C | 0.4790 | 0.0037  | 0.0010 | 4.48E-04 |
| rs10185507  | 2 | 34,143,568 | T | C | 0.4762 | 0.0069  | 0.0010 | 5.77E-11 |
| rs6717900   | 2 | 34,386,394 | A | G | 0.3677 | 0.0091  | 0.0011 | 4.93E-17 |
| rs28607949  | 2 | 35,041,094 | T | C | 0.4539 | -0.0082 | 0.0011 | 9.51E-15 |
| rs6543891   | 2 | 35,207,592 | T | C | 0.3100 | -0.0040 | 0.0011 | 4.04E-04 |
| rs1595725   | 2 | 35,767,662 | A | G | 0.2436 | -0.0081 | 0.0012 | 2.96E-11 |

|             |   |            |   |   |        |         |        |          |
|-------------|---|------------|---|---|--------|---------|--------|----------|
| rs305191    | 2 | 36,252,564 | T | C | 0.2675 | 0.0091  | 0.0012 | 1.76E-14 |
| rs3770963   | 2 | 36,588,106 | T | C | 0.6792 | -0.0073 | 0.0011 | 8.59E-11 |
| rs3770772   | 2 | 37,192,607 | T | C | 0.7452 | 0.0075  | 0.0012 | 4.55E-10 |
| rs2707237   | 2 | 38,095,622 | A | G | 0.5308 | 0.0039  | 0.0010 | 2.28E-04 |
| rs3112178   | 2 | 38,960,967 | A | G | 0.2514 | -0.0070 | 0.0012 | 7.66E-09 |
| rs984707    | 2 | 40,596,632 | T | G | 0.3897 | 0.0062  | 0.0011 | 9.67E-09 |
| rs148738365 | 2 | 40,836,791 | T | C | 0.0474 | -0.0090 | 0.0025 | 2.71E-04 |
| rs10180845  | 2 | 41,475,868 | T | C | 0.6343 | -0.0096 | 0.0011 | 1.02E-18 |
| rs188691722 | 2 | 41,588,757 | A | G | 0.9917 | -0.0217 | 0.0058 | 2.01E-04 |
| rs74507577  | 2 | 41,931,366 | T | C | 0.0546 | -0.0088 | 0.0023 | 1.37E-04 |
| rs11891679  | 2 | 42,275,726 | C | G | 0.7534 | 0.0036  | 0.0012 | 3.27E-03 |
| rs13016201  | 2 | 43,011,795 | T | C | 0.1615 | -0.0076 | 0.0014 | 8.34E-08 |
| rs75313851  | 2 | 44,591,972 | A | G | 0.0647 | -0.0185 | 0.0021 | 2.88E-18 |
| rs12468040  | 2 | 44,854,981 | T | G | 0.3774 | 0.0115  | 0.0011 | 1.20E-26 |
| rs343958    | 2 | 44,942,019 | A | G | 0.1502 | 0.0048  | 0.0015 | 1.06E-03 |
| rs741813    | 2 | 45,167,886 | A | T | 0.5642 | -0.0085 | 0.0011 | 6.57E-16 |
| rs141921322 | 2 | 47,234,937 | C | G | 0.9969 | -0.0358 | 0.0095 | 1.70E-04 |
| rs3136337   | 2 | 48,028,465 | T | C | 0.1072 | -0.0101 | 0.0017 | 2.33E-09 |
| rs79073127  | 2 | 48,573,895 | C | G | 0.1204 | -0.0135 | 0.0016 | 6.18E-17 |
| rs4316980   | 2 | 48,650,308 | T | C | 0.3053 | 0.0101  | 0.0011 | 7.75E-19 |
| rs56012105  | 2 | 49,080,934 | T | G | 0.6014 | -0.0089 | 0.0011 | 7.11E-17 |
| rs12713051  | 2 | 49,562,932 | A | G | 0.3379 | 0.0057  | 0.0011 | 2.53E-07 |
| rs57081355  | 2 | 49,605,567 | T | C | 0.0855 | -0.0160 | 0.0019 | 1.05E-17 |
| rs11895566  | 2 | 49,854,117 | T | C | 0.5616 | -0.0060 | 0.0011 | 9.96E-09 |
| rs12476510  | 2 | 50,391,401 | T | C | 0.0843 | 0.0063  | 0.0019 | 8.29E-04 |
| rs1851013   | 2 | 50,630,572 | T | C | 0.3740 | -0.0095 | 0.0011 | 1.54E-18 |
| rs10189177  | 2 | 50,744,732 | T | C | 0.6143 | -0.0074 | 0.0011 | 8.05E-12 |
| rs3850335   | 2 | 51,010,895 | T | C | 0.1982 | -0.0041 | 0.0013 | 1.61E-03 |
| rs62140599  | 2 | 51,017,478 | A | T | 0.7842 | 0.0158  | 0.0013 | 1.26E-35 |
| rs62142894  | 2 | 51,539,442 | T | C | 0.2615 | 0.0097  | 0.0012 | 5.26E-16 |
| rs7423940   | 2 | 51,562,273 | A | G | 0.6204 | -0.0006 | 0.0011 | 6.00E-01 |
| rs116650695 | 2 | 51,647,759 | C | G | 0.0238 | -0.0166 | 0.0035 | 1.55E-06 |
| rs1516180   | 2 | 51,932,130 | T | C | 0.1180 | 0.0208  | 0.0016 | 1.56E-37 |
| rs78006700  | 2 | 52,211,374 | A | G | 0.9590 | -0.0141 | 0.0026 | 8.30E-08 |
| rs1344594   | 2 | 53,416,895 | C | G | 0.0766 | 0.0124  | 0.0020 | 2.84E-10 |
| rs10177230  | 2 | 53,715,181 | T | C | 0.4924 | 0.0064  | 0.0010 | 1.07E-09 |
| rs193262992 | 2 | 53,738,317 | T | C | 0.0127 | 0.0146  | 0.0047 | 2.10E-03 |
| rs62138036  | 2 | 54,418,977 | A | G | 0.0316 | -0.0129 | 0.0033 | 7.84E-05 |
| rs6726292   | 2 | 55,156,630 | A | G | 0.2759 | 0.0012  | 0.0012 | 3.15E-01 |
| rs75002848  | 2 | 55,234,345 | T | C | 0.0794 | 0.0089  | 0.0019 | 4.67E-06 |
| rs78539852  | 2 | 55,304,186 | T | C | 0.9370 | 0.0125  | 0.0022 | 6.08E-09 |
| rs3099082   | 2 | 55,586,647 | T | G | 0.5673 | 0.0070  | 0.0011 | 2.64E-11 |
| rs888280    | 2 | 56,431,425 | A | T | 0.1301 | -0.0081 | 0.0016 | 2.16E-07 |
| rs17047680  | 2 | 56,466,964 | A | G | 0.2390 | 0.0074  | 0.0012 | 1.32E-09 |
| rs11676604  | 2 | 57,410,634 | A | G | 0.3874 | -0.0084 | 0.0011 | 3.86E-15 |
| rs13021827  | 2 | 57,876,873 | T | C | 0.7750 | 0.0103  | 0.0013 | 2.20E-16 |
| rs11688767  | 2 | 57,988,194 | A | T | 0.5107 | -0.0143 | 0.0010 | 2.39E-42 |
| rs11884509  | 2 | 58,666,295 | C | G | 0.8758 | 0.0173  | 0.0016 | 9.13E-28 |

|             |   |            |   |   |        |         |        |          |
|-------------|---|------------|---|---|--------|---------|--------|----------|
| rs72817932  | 2 | 58,927,781 | A | G | 0.0366 | -0.0066 | 0.0028 | 1.89E-02 |
| rs17049712  | 2 | 58,961,136 | T | C | 0.2966 | -0.0134 | 0.0011 | 1.01E-31 |
| rs2540323   | 2 | 58,973,397 | A | T | 0.0969 | 0.0075  | 0.0018 | 2.45E-05 |
| rs186770769 | 2 | 59,049,405 | A | C | 0.0041 | -0.0138 | 0.0084 | 1.01E-01 |
| rs6704856   | 2 | 59,170,069 | T | C | 0.3166 | 0.0099  | 0.0011 | 1.17E-18 |
| rs13019114  | 2 | 59,314,142 | T | C | 0.6309 | -0.0059 | 0.0011 | 4.58E-08 |
| rs10210132  | 2 | 59,471,298 | T | C | 0.1731 | 0.0072  | 0.0014 | 1.90E-07 |
| rs11691352  | 2 | 59,949,495 | A | G | 0.3308 | 0.0077  | 0.0011 | 3.26E-12 |
| rs11679269  | 2 | 60,061,855 | A | G | 0.0757 | -0.0075 | 0.0020 | 1.63E-04 |
| rs359261    | 2 | 60,487,134 | T | C | 0.3670 | 0.0101  | 0.0011 | 3.16E-20 |
| rs56158183  | 2 | 60,632,924 | A | G | 0.0760 | 0.0237  | 0.0020 | 3.43E-33 |
| rs10189857  | 2 | 60,713,235 | A | G | 0.5701 | 0.0138  | 0.0011 | 7.74E-39 |
| rs2195086   | 2 | 60,814,466 | T | G | 0.8447 | 0.0125  | 0.0014 | 5.37E-18 |
| rs72805319  | 2 | 60,883,140 | T | C | 0.0135 | -0.0106 | 0.0045 | 1.94E-02 |
| rs141627034 | 2 | 61,427,563 | A | G | 0.0252 | -0.0199 | 0.0034 | 4.98E-09 |
| rs10496091  | 2 | 61,482,261 | A | G | 0.2803 | -0.0131 | 0.0012 | 3.53E-29 |
| rs4672530   | 2 | 62,748,319 | T | C | 0.1137 | 0.0110  | 0.0016 | 2.81E-11 |
| rs35443214  | 2 | 63,297,247 | T | C | 0.8203 | 0.0078  | 0.0014 | 1.26E-08 |
| rs55940715  | 2 | 63,929,776 | T | C | 0.0150 | -0.0119 | 0.0043 | 5.84E-03 |
| rs149904187 | 2 | 65,221,632 | T | C | 0.9938 | -0.0232 | 0.0069 | 7.46E-04 |
| rs35512022  | 2 | 65,394,309 | A | G | 0.2823 | -0.0054 | 0.0012 | 3.33E-06 |
| rs6740462   | 2 | 65,667,272 | A | C | 0.7378 | -0.0088 | 0.0012 | 1.25E-13 |
| rs1819852   | 2 | 65,892,430 | A | G | 0.4396 | -0.0053 | 0.0011 | 4.69E-07 |
| rs2287281   | 2 | 65,970,726 | A | T | 0.4252 | -0.0042 | 0.0011 | 6.70E-05 |
| rs2049019   | 2 | 66,671,858 | A | C | 0.6812 | 0.0048  | 0.0011 | 2.01E-05 |
| rs1820986   | 2 | 68,075,346 | A | G | 0.1373 | -0.0116 | 0.0015 | 2.35E-14 |
| rs6731373   | 2 | 68,503,044 | A | G | 0.3456 | -0.0087 | 0.0011 | 2.64E-15 |
| rs180734848 | 2 | 69,591,691 | T | C | 0.9964 | -0.0291 | 0.0089 | 1.13E-03 |
| rs564868076 | 2 | 70,478,519 | A | G | 0.0022 | -0.0323 | 0.0118 | 6.33E-03 |
| rs2706762   | 2 | 70,488,470 | T | C | 0.1478 | 0.0082  | 0.0015 | 2.85E-08 |
| rs58465019  | 2 | 71,391,163 | A | G | 0.5981 | -0.0060 | 0.0011 | 1.78E-08 |
| rs10190799  | 2 | 72,392,588 | A | T | 0.6271 | -0.0072 | 0.0011 | 2.88E-11 |
| rs34363861  | 2 | 73,490,412 | A | G | 0.5208 | 0.0085  | 0.0011 | 5.26E-16 |
| rs12620091  | 2 | 73,906,819 | T | C | 0.5941 | 0.0050  | 0.0011 | 2.83E-06 |
| rs828867    | 2 | 74,334,462 | A | G | 0.5435 | -0.0055 | 0.0011 | 2.11E-07 |
| rs7560024   | 2 | 75,828,086 | A | T | 0.3363 | -0.0028 | 0.0011 | 1.01E-02 |
| rs142520681 | 2 | 75,840,147 | T | C | 0.0022 | -0.0165 | 0.0116 | 1.53E-01 |
| rs75724179  | 2 | 76,480,638 | A | G | 0.0101 | 0.0210  | 0.0053 | 6.47E-05 |
| rs10190071  | 2 | 77,893,810 | A | C | 0.4212 | 0.0051  | 0.0011 | 1.73E-06 |
| rs187587509 | 2 | 77,969,663 | A | T | 0.9841 | -0.0124 | 0.0043 | 4.04E-03 |
| rs2056385   | 2 | 78,867,675 | A | T | 0.7983 | 0.0045  | 0.0013 | 5.18E-04 |
| rs140845626 | 2 | 79,490,938 | T | C | 0.0155 | -0.0143 | 0.0043 | 7.85E-04 |
| rs1159457   | 2 | 80,002,274 | T | G | 0.9558 | -0.0074 | 0.0025 | 3.48E-03 |
| rs2916490   | 2 | 80,192,352 | A | G | 0.3069 | -0.0104 | 0.0011 | 4.04E-20 |
| rs111376634 | 2 | 80,247,352 | A | C | 0.0407 | 0.0118  | 0.0027 | 1.01E-05 |
| rs77599217  | 2 | 80,413,713 | T | C | 0.9141 | -0.0139 | 0.0019 | 1.10E-13 |
| rs75931210  | 2 | 80,540,462 | T | C | 0.9653 | 0.0194  | 0.0029 | 1.34E-11 |
| rs6759220   | 2 | 80,590,324 | A | G | 0.2322 | -0.0045 | 0.0012 | 2.54E-04 |

|             |   |             |   |   |        |         |        |           |
|-------------|---|-------------|---|---|--------|---------|--------|-----------|
| rs1971117   | 2 | 80,713,484  | C | G | 0.6820 | -0.0053 | 0.0011 | 3.05E-06  |
| rs6738160   | 2 | 81,392,921  | T | C | 0.5027 | -0.0045 | 0.0010 | 2.03E-05  |
| rs72919450  | 2 | 81,999,568  | T | C | 0.1027 | -0.0118 | 0.0017 | 7.08E-12  |
| rs12471362  | 2 | 82,388,445  | C | G | 0.2356 | -0.0055 | 0.0012 | 7.41E-06  |
| rs114638730 | 2 | 83,059,163  | T | C | 0.0128 | -0.0255 | 0.0047 | 5.11E-08  |
| rs114363006 | 2 | 84,499,954  | T | C | 0.9866 | -0.0084 | 0.0046 | 6.76E-02  |
| rs72932883  | 2 | 84,545,030  | C | G | 0.8408 | 0.0073  | 0.0014 | 2.95E-07  |
| rs11683207  | 2 | 98,333,290  | T | C | 0.8282 | 0.0087  | 0.0014 | 4.12E-10  |
| rs147607334 | 2 | 98,433,691  | T | C | 0.0215 | -0.0213 | 0.0040 | 8.03E-08  |
| rs115652492 | 2 | 98,462,458  | T | C | 0.0235 | -0.0218 | 0.0035 | 2.97E-10  |
| rs62156718  | 2 | 98,862,214  | T | C | 0.0640 | 0.0120  | 0.0021 | 2.15E-08  |
| rs180957422 | 2 | 99,954,467  | T | C | 0.9919 | 0.0225  | 0.0060 | 1.77E-04  |
| rs6715321   | 2 | 100,109,001 | T | C | 0.4284 | -0.0098 | 0.0011 | 2.20E-20  |
| rs146297952 | 2 | 100,553,210 | A | G | 0.0102 | 0.0166  | 0.0053 | 1.91E-03  |
| rs35300735  | 2 | 100,667,829 | A | G | 0.1855 | 0.0196  | 0.0013 | 7.38E-48  |
| rs4583487   | 2 | 100,837,126 | T | G | 0.3961 | 0.0230  | 0.0011 | 2.58E-102 |
| rs111675296 | 2 | 100,871,571 | C | G | 0.9559 | 0.0164  | 0.0026 | 1.45E-10  |
| rs6542924   | 2 | 100,893,113 | A | C | 0.6796 | 0.0206  | 0.0011 | 3.42E-75  |
| rs2942904   | 2 | 101,306,999 | A | G | 0.4898 | 0.0077  | 0.0010 | 1.83E-13  |
| rs11683877  | 2 | 101,644,855 | A | G | 0.3040 | -0.0082 | 0.0011 | 4.27E-13  |
| rs118129147 | 2 | 101,756,135 | A | T | 0.0018 | 0.0471  | 0.0127 | 1.97E-04  |
| rs7577705   | 2 | 102,020,770 | A | G | 0.8093 | 0.0044  | 0.0013 | 9.02E-04  |
| rs139472275 | 2 | 103,895,426 | T | C | 0.1189 | 0.0097  | 0.0016 | 2.35E-09  |
| rs34748029  | 2 | 104,060,003 | A | C | 0.0866 | 0.0189  | 0.0019 | 7.58E-24  |
| rs1837714   | 2 | 104,450,445 | C | G | 0.3952 | 0.0130  | 0.0011 | 8.34E-34  |
| rs6717419   | 2 | 104,498,762 | C | G | 0.0022 | 0.0056  | 0.0115 | 6.25E-01  |
| rs182550251 | 2 | 104,708,055 | T | G | 0.9975 | 0.0301  | 0.0109 | 5.66E-03  |
| rs57463591  | 2 | 105,869,624 | T | C | 0.1290 | 0.0091  | 0.0016 | 5.85E-09  |
| rs13429686  | 2 | 105,925,165 | A | G | 0.8725 | 0.0145  | 0.0016 | 1.86E-20  |
| rs6724709   | 2 | 107,260,133 | C | G | 0.4027 | 0.0050  | 0.0011 | 3.17E-06  |
| rs9789595   | 2 | 107,539,301 | T | C | 0.6081 | 0.0138  | 0.0011 | 9.16E-38  |
| rs1820310   | 2 | 107,982,974 | A | C | 0.2575 | 0.0049  | 0.0012 | 4.96E-05  |
| rs182547196 | 2 | 109,297,803 | A | G | 0.9881 | 0.0088  | 0.0049 | 7.35E-02  |
| rs7589741   | 2 | 109,950,545 | A | T | 0.3882 | -0.0069 | 0.0011 | 1.24E-10  |
| rs3811038   | 2 | 113,240,183 | T | C | 0.7214 | 0.0095  | 0.0012 | 4.05E-16  |
| rs72823521  | 2 | 113,446,619 | T | G | 0.1992 | 0.0069  | 0.0013 | 1.83E-07  |
| rs1049137   | 2 | 113,975,110 | A | G | 0.7463 | -0.0065 | 0.0012 | 6.18E-08  |
| rs11900605  | 2 | 114,449,152 | T | C | 0.4159 | 0.0051  | 0.0011 | 1.29E-06  |
| rs62164492  | 2 | 115,798,618 | C | G | 0.8645 | 0.0075  | 0.0015 | 1.09E-06  |
| rs12621553  | 2 | 116,152,348 | T | C | 0.5585 | -0.0069 | 0.0011 | 5.74E-11  |
| rs532638370 | 2 | 116,825,567 | T | C | 0.0066 | 0.0138  | 0.0068 | 4.37E-02  |
| rs28513960  | 2 | 117,588,471 | A | G | 0.3769 | 0.0058  | 0.0011 | 8.64E-08  |
| rs6705667   | 2 | 118,624,064 | A | G | 0.4524 | -0.0051 | 0.0011 | 1.14E-06  |
| rs1438856   | 2 | 119,570,839 | A | G | 0.3532 | -0.0039 | 0.0011 | 4.17E-04  |
| rs11691795  | 2 | 120,350,946 | A | T | 0.1830 | 0.0080  | 0.0014 | 3.32E-09  |
| rs71424326  | 2 | 120,489,240 | T | C | 0.0580 | -0.0139 | 0.0023 | 7.25E-10  |
| rs12613044  | 2 | 122,626,526 | C | G | 0.4463 | -0.0072 | 0.0011 | 1.10E-11  |
| rs116156258 | 2 | 122,653,927 | T | C | 0.0181 | 0.0059  | 0.0040 | 1.36E-01  |

|             |   |             |   |   |        |         |        |          |
|-------------|---|-------------|---|---|--------|---------|--------|----------|
| rs62169215  | 2 | 123,576,559 | T | G | 0.7660 | -0.0082 | 0.0012 | 2.76E-11 |
| rs11895308  | 2 | 124,035,378 | T | C | 0.3915 | 0.0034  | 0.0011 | 1.65E-03 |
| rs7573618   | 2 | 124,428,611 | A | G | 0.3987 | 0.0075  | 0.0011 | 2.57E-12 |
| rs56201719  | 2 | 125,012,058 | C | G | 0.2877 | 0.0110  | 0.0012 | 1.23E-21 |
| rs12612022  | 2 | 125,290,839 | T | C | 0.6817 | 0.0065  | 0.0011 | 9.27E-09 |
| rs72843198  | 2 | 125,293,580 | T | C | 0.0482 | 0.0171  | 0.0024 | 2.99E-12 |
| rs141637611 | 2 | 125,425,037 | A | C | 0.0026 | 0.0291  | 0.0106 | 6.13E-03 |
| rs148064621 | 2 | 125,952,405 | A | C | 0.9971 | 0.0223  | 0.0101 | 2.71E-02 |
| rs193244405 | 2 | 126,034,805 | T | C | 0.1003 | -0.0134 | 0.0017 | 1.62E-14 |
| rs187430004 | 2 | 127,002,506 | T | C | 0.0020 | 0.0295  | 0.0120 | 1.41E-02 |
| rs28387129  | 2 | 127,427,673 | T | C | 0.1002 | 0.0077  | 0.0018 | 1.19E-05 |
| rs59038595  | 2 | 127,957,428 | A | C | 0.4204 | -0.0069 | 0.0011 | 7.78E-11 |
| rs7578247   | 2 | 128,562,813 | A | G | 0.6377 | -0.0080 | 0.0011 | 2.25E-13 |
| rs34739831  | 2 | 129,588,757 | A | G | 0.8427 | 0.0072  | 0.0014 | 5.88E-07 |
| rs1922715   | 2 | 129,953,740 | T | C | 0.4310 | 0.0044  | 0.0011 | 3.54E-05 |
| rs2521934   | 2 | 130,376,928 | A | G | 0.6357 | -0.0037 | 0.0011 | 7.06E-04 |
| rs112349871 | 2 | 130,395,286 | T | G | 0.0260 | 0.0139  | 0.0033 | 2.65E-05 |
| rs2315598   | 2 | 133,277,754 | T | C | 0.4414 | -0.0051 | 0.0011 | 1.05E-06 |
| rs527837917 | 2 | 133,980,564 | A | G | 0.9981 | 0.0278  | 0.0127 | 2.86E-02 |
| rs72843280  | 2 | 134,536,352 | A | C | 0.8229 | -0.0045 | 0.0014 | 1.16E-03 |
| rs16830012  | 2 | 134,812,663 | T | G | 0.9658 | -0.0109 | 0.0029 | 1.66E-04 |
| rs115430075 | 2 | 135,205,052 | A | G | 0.9860 | 0.0079  | 0.0045 | 8.03E-02 |
| rs1346825   | 2 | 137,259,109 | T | C | 0.1314 | 0.0047  | 0.0015 | 2.36E-03 |
| rs7340271   | 2 | 137,492,022 | A | G | 0.5064 | 0.0030  | 0.0010 | 3.63E-03 |
| rs16839236  | 2 | 138,404,751 | A | G | 0.5134 | -0.0035 | 0.0010 | 7.25E-04 |
| rs11897647  | 2 | 138,451,864 | T | C | 0.1811 | 0.0092  | 0.0014 | 1.33E-11 |
| rs16840311  | 2 | 138,864,290 | A | G | 0.3978 | -0.0055 | 0.0011 | 2.19E-07 |
| rs7601784   | 2 | 139,470,731 | A | G | 0.1339 | 0.0103  | 0.0015 | 1.95E-11 |
| rs344698    | 2 | 140,129,860 | A | G | 0.2095 | 0.0054  | 0.0013 | 2.80E-05 |
| rs11902126  | 2 | 140,174,172 | A | T | 0.2637 | -0.0076 | 0.0012 | 1.75E-10 |
| rs58101352  | 2 | 140,277,226 | A | G | 0.9792 | -0.0291 | 0.0037 | 2.40E-15 |
| rs1464297   | 2 | 140,653,749 | T | C | 0.6515 | -0.0107 | 0.0011 | 2.05E-22 |
| rs4461204   | 2 | 141,600,541 | T | C | 0.0728 | -0.0119 | 0.0020 | 3.26E-09 |
| rs13026625  | 2 | 141,949,960 | T | C | 0.4703 | 0.0084  | 0.0010 | 1.50E-15 |
| rs11685467  | 2 | 142,197,623 | A | G | 0.2327 | 0.0043  | 0.0012 | 4.81E-04 |
| rs1483149   | 2 | 142,319,979 | T | C | 0.2689 | -0.0121 | 0.0012 | 1.33E-24 |
| rs355588    | 2 | 142,385,034 | A | G | 0.9388 | 0.0178  | 0.0022 | 3.66E-16 |
| rs1191970   | 2 | 142,759,003 | A | G | 0.3300 | -0.0056 | 0.0011 | 5.35E-07 |
| rs9287335   | 2 | 143,006,923 | A | T | 0.2733 | -0.0055 | 0.0012 | 2.66E-06 |
| rs1017752   | 2 | 143,380,979 | T | C | 0.4902 | -0.0089 | 0.0010 | 2.44E-17 |
| rs3856363   | 2 | 143,902,663 | T | C | 0.2661 | -0.0036 | 0.0012 | 2.18E-03 |
| rs10189912  | 2 | 144,162,609 | A | G | 0.6362 | -0.0134 | 0.0011 | 4.10E-35 |
| rs28396876  | 2 | 144,487,090 | A | G | 0.6169 | -0.0125 | 0.0011 | 2.45E-31 |
| rs17666845  | 2 | 144,816,988 | A | G | 0.6944 | -0.0077 | 0.0011 | 1.13E-11 |
| rs35339313  | 2 | 145,139,727 | T | C | 0.3517 | 0.0069  | 0.0011 | 2.78E-10 |
| rs12327962  | 2 | 145,218,605 | A | G | 0.1334 | -0.0074 | 0.0015 | 1.53E-06 |
| rs11682833  | 2 | 145,623,920 | T | C | 0.0739 | -0.0191 | 0.0020 | 1.39E-21 |
| rs55855159  | 2 | 145,749,950 | T | C | 0.2712 | 0.0097  | 0.0012 | 1.58E-16 |

|             |   |             |   |   |        |         |        |          |
|-------------|---|-------------|---|---|--------|---------|--------|----------|
| rs274842    | 2 | 145,922,779 | A | G | 0.3843 | -0.0080 | 0.0011 | 1.11E-13 |
| rs187841532 | 2 | 146,203,298 | A | G | 0.0012 | 0.0552  | 0.0159 | 5.12E-04 |
| rs1484916   | 2 | 146,350,066 | C | G | 0.0598 | -0.0059 | 0.0022 | 7.29E-03 |
| rs189887894 | 2 | 146,471,967 | A | T | 0.0062 | 0.0115  | 0.0068 | 9.14E-02 |
| rs79766583  | 2 | 146,701,256 | T | G | 0.1272 | 0.0086  | 0.0016 | 4.47E-08 |
| rs10432338  | 2 | 147,806,785 | T | G | 0.1865 | -0.0075 | 0.0013 | 2.69E-08 |
| rs12476278  | 2 | 148,123,250 | A | G | 0.1596 | 0.0039  | 0.0014 | 6.84E-03 |
| rs17742342  | 2 | 148,633,936 | A | C | 0.7990 | -0.0127 | 0.0013 | 2.97E-22 |
| rs13423152  | 2 | 149,200,767 | T | C | 0.7373 | 0.0040  | 0.0012 | 8.66E-04 |
| rs12614977  | 2 | 149,510,282 | A | G | 0.0663 | 0.0061  | 0.0021 | 3.82E-03 |
| rs10173759  | 2 | 150,727,271 | T | C | 0.0247 | -0.0070 | 0.0034 | 3.87E-02 |
| rs745720    | 2 | 150,858,540 | T | C | 0.1710 | 0.0054  | 0.0014 | 1.04E-04 |
| rs2222760   | 2 | 151,345,113 | A | G | 0.2826 | -0.0079 | 0.0012 | 8.24E-12 |
| rs5011637   | 2 | 151,645,050 | T | G | 0.2617 | 0.0055  | 0.0012 | 3.15E-06 |
| rs2190368   | 2 | 151,752,775 | A | G | 0.5090 | 0.0060  | 0.0010 | 1.16E-08 |
| rs35233519  | 2 | 151,998,046 | T | C | 0.3489 | -0.0065 | 0.0011 | 3.94E-09 |
| rs35025729  | 2 | 152,000,796 | T | C | 0.2338 | 0.0064  | 0.0012 | 2.23E-07 |
| rs34288092  | 2 | 153,177,757 | A | G | 0.0747 | -0.0073 | 0.0020 | 2.29E-04 |
| rs35087630  | 2 | 154,793,237 | A | T | 0.2673 | 0.0076  | 0.0012 | 1.64E-10 |
| rs62172784  | 2 | 154,824,502 | A | G | 0.8925 | 0.0103  | 0.0017 | 1.32E-09 |
| rs799809    | 2 | 155,197,887 | A | T | 0.7048 | -0.0065 | 0.0011 | 1.47E-08 |
| rs16837770  | 2 | 155,366,857 | A | G | 0.2005 | -0.0056 | 0.0013 | 1.71E-05 |
| rs62170775  | 2 | 155,535,967 | T | G | 0.4460 | -0.0083 | 0.0011 | 2.62E-15 |
| rs2591158   | 2 | 155,647,666 | T | G | 0.6711 | -0.0061 | 0.0011 | 5.98E-08 |
| rs1900132   | 2 | 155,703,068 | A | G | 0.7126 | -0.0051 | 0.0012 | 8.94E-06 |
| rs11677994  | 2 | 156,463,754 | A | G | 0.4107 | 0.0007  | 0.0011 | 5.24E-01 |
| rs2139036   | 2 | 156,511,426 | T | C | 0.6785 | -0.0057 | 0.0011 | 4.57E-07 |
| rs148259429 | 2 | 156,608,859 | A | G | 0.9852 | -0.0185 | 0.0044 | 3.10E-05 |
| rs12473428  | 2 | 156,693,900 | T | C | 0.9021 | 0.0105  | 0.0018 | 2.25E-09 |
| rs2103263   | 2 | 156,837,934 | T | C | 0.6561 | -0.0065 | 0.0011 | 3.90E-09 |
| rs61597598  | 2 | 156,996,626 | A | G | 0.1274 | -0.0090 | 0.0016 | 9.63E-09 |
| rs72892121  | 2 | 157,134,495 | T | C | 0.9332 | 0.0165  | 0.0021 | 3.29E-15 |
| rs34967558  | 2 | 157,490,241 | T | C | 0.7640 | -0.0101 | 0.0012 | 2.56E-16 |
| rs7601304   | 2 | 157,707,699 | A | T | 0.8767 | 0.0066  | 0.0016 | 3.28E-05 |
| rs143832276 | 2 | 157,908,788 | A | T | 0.9927 | -0.0183 | 0.0062 | 3.16E-03 |
| rs185923464 | 2 | 158,487,190 | A | G | 0.0248 | -0.0122 | 0.0034 | 2.98E-04 |
| rs758278    | 2 | 158,862,120 | A | G | 0.3740 | 0.0039  | 0.0011 | 3.63E-04 |
| rs4664980   | 2 | 159,439,911 | T | C | 0.7970 | 0.0088  | 0.0013 | 1.05E-11 |
| rs11693305  | 2 | 159,597,901 | A | G | 0.0877 | 0.0101  | 0.0019 | 5.34E-08 |
| rs7567974   | 2 | 160,271,750 | T | G | 0.1699 | 0.0061  | 0.0014 | 1.07E-05 |
| rs17829933  | 2 | 160,861,579 | A | G | 0.3275 | -0.0007 | 0.0011 | 5.15E-01 |
| rs12998587  | 2 | 161,242,295 | T | C | 0.2974 | 0.0092  | 0.0011 | 9.64E-16 |
| rs55874516  | 2 | 161,359,854 | A | G | 0.0368 | 0.0251  | 0.0028 | 1.61E-19 |
| rs13025770  | 2 | 161,495,726 | T | C | 0.1831 | -0.0090 | 0.0014 | 2.90E-11 |
| rs2884364   | 2 | 161,977,647 | A | G | 0.3818 | -0.0159 | 0.0011 | 1.29E-49 |
| rs3171840   | 2 | 162,105,530 | T | C | 0.2940 | 0.0132  | 0.0011 | 9.69E-31 |
| rs12617656  | 2 | 162,851,147 | T | C | 0.6754 | -0.0130 | 0.0013 | 4.16E-24 |
| rs13416088  | 2 | 162,997,659 | A | G | 0.1925 | -0.0045 | 0.0013 | 7.28E-04 |



|            |   |             |   |   |        |         |        |          |
|------------|---|-------------|---|---|--------|---------|--------|----------|
| rs2615327  | 2 | 164,348,164 | C | G | 0.3759 | -0.0118 | 0.0011 | 1.11E-27 |
| rs10497239 | 2 | 164,531,305 | A | T | 0.1634 | -0.0080 | 0.0014 | 1.72E-08 |
| rs17183814 | 2 | 166,152,389 | A | G | 0.0725 | -0.0059 | 0.0020 | 3.50E-03 |
| rs7567296  | 2 | 166,295,835 | A | G | 0.7638 | 0.0040  | 0.0012 | 1.23E-03 |
| rs10497260 | 2 | 166,310,361 | A | T | 0.0826 | -0.0140 | 0.0019 | 2.05E-13 |
| rs1551336  | 2 | 166,460,479 | T | C | 0.4276 | -0.0052 | 0.0011 | 8.72E-07 |
| rs10803801 | 2 | 166,656,507 | T | C | 0.2747 | -0.0105 | 0.0012 | 3.06E-19 |
| rs11887519 | 2 | 167,246,517 | T | C | 0.1336 | -0.0029 | 0.0015 | 5.59E-02 |
| rs18677236 | 2 | 167,413,648 | T | C | 0.0177 | 0.0091  | 0.0040 | 2.34E-02 |
| rs67300634 | 2 | 167,432,379 | A | T | 0.5517 | 0.0047  | 0.0011 | 6.65E-06 |
| rs76474225 | 2 | 169,112,526 | T | C | 0.0604 | -0.0119 | 0.0022 | 7.44E-08 |
| rs7597462  | 2 | 169,226,358 | A | T | 0.7666 | 0.0064  | 0.0012 | 2.64E-07 |
| rs16855816 | 2 | 169,624,261 | A | G | 0.8963 | 0.0099  | 0.0017 | 7.18E-09 |
| rs3770611  | 2 | 170,143,494 | A | C | 0.3541 | 0.0051  | 0.0011 | 3.64E-06 |
| rs12612683 | 2 | 170,220,594 | T | C | 0.7320 | 0.0055  | 0.0012 | 3.85E-06 |
| rs12692948 | 2 | 171,185,221 | A | C | 0.6497 | -0.0072 | 0.0011 | 4.21E-11 |
| rs34127006 | 2 | 172,313,566 | C | G | 0.9387 | 0.0092  | 0.0022 | 2.72E-05 |
| rs79131834 | 2 | 172,350,436 | T | C | 0.0519 | -0.0068 | 0.0024 | 4.20E-03 |
| rs62182444 | 2 | 172,812,544 | A | C | 0.2427 | -0.0126 | 0.0012 | 5.24E-25 |
| rs788171   | 2 | 172,921,832 | T | C | 0.3738 | 0.0093  | 0.0011 | 8.23E-18 |
| rs2676507  | 2 | 173,729,572 | A | G | 0.3179 | 0.0083  | 0.0011 | 1.97E-13 |
| rs3754740  | 2 | 174,062,595 | A | G | 0.6643 | 0.0095  | 0.0011 | 1.30E-17 |
| rs10193498 | 2 | 174,094,345 | A | T | 0.7471 | 0.0113  | 0.0012 | 7.89E-21 |
| rs7579774  | 2 | 174,162,500 | A | G | 0.2877 | -0.0069 | 0.0012 | 2.10E-09 |
| rs2919151  | 2 | 174,193,639 | T | G | 0.4865 | 0.0087  | 0.0010 | 1.14E-16 |
| rs15122205 | 2 | 174,735,734 | A | G | 0.9662 | -0.0151 | 0.0029 | 2.21E-07 |
| rs11688834 | 2 | 174,933,420 | T | C | 0.2767 | 0.0061  | 0.0012 | 2.23E-07 |
| rs72915557 | 2 | 175,199,092 | A | G | 0.0598 | -0.0206 | 0.0022 | 1.16E-20 |
| rs1840633  | 2 | 175,713,988 | A | G | 0.3754 | 0.0068  | 0.0011 | 3.15E-10 |
| rs62183418 | 2 | 176,233,578 | A | G | 0.8881 | 0.0120  | 0.0017 | 5.80E-13 |
| rs4972778  | 2 | 176,483,881 | T | C | 0.5709 | -0.0061 | 0.0011 | 7.06E-09 |
| rs17400325 | 2 | 178,565,913 | T | C | 0.9597 | -0.0242 | 0.0027 | 1.04E-19 |
| rs77056518 | 2 | 178,887,611 | T | C | 0.0985 | -0.0085 | 0.0018 | 1.17E-06 |
| rs2044480  | 2 | 179,939,493 | A | G | 0.0972 | -0.0076 | 0.0018 | 1.98E-05 |
| rs259808   | 2 | 180,791,419 | T | G | 0.1893 | -0.0086 | 0.0013 | 1.02E-10 |
| rs12693219 | 2 | 180,923,138 | T | C | 0.4214 | 0.0101  | 0.0011 | 1.50E-21 |
| rs57282763 | 2 | 180,961,890 | A | T | 0.1211 | 0.0017  | 0.0016 | 2.87E-01 |
| rs7588437  | 2 | 181,575,281 | A | G | 0.3601 | 0.0071  | 0.0011 | 8.75E-11 |
| rs10189949 | 2 | 182,132,131 | T | C | 0.9220 | 0.0094  | 0.0020 | 1.43E-06 |
| rs16867434 | 2 | 182,359,592 | T | C | 0.9090 | -0.0074 | 0.0018 | 5.44E-05 |
| rs72896637 | 2 | 183,543,531 | T | G | 0.0730 | 0.0167  | 0.0020 | 1.41E-16 |
| rs1561369  | 2 | 183,702,964 | A | G | 0.1205 | 0.0088  | 0.0016 | 4.45E-08 |
| rs2705746  | 2 | 183,892,106 | T | C | 0.0308 | -0.0165 | 0.0030 | 5.05E-08 |
| rs58400473 | 2 | 184,370,023 | A | G | 0.4829 | -0.0044 | 0.0010 | 3.03E-05 |
| rs10497636 | 2 | 184,609,810 | A | T | 0.1573 | -0.0065 | 0.0014 | 6.75E-06 |
| rs62177067 | 2 | 185,232,019 | T | C | 0.1567 | -0.0085 | 0.0014 | 2.90E-09 |
| rs1021043  | 2 | 185,507,421 | A | G | 0.6038 | -0.0058 | 0.0011 | 5.43E-08 |
| rs75142797 | 2 | 185,845,180 | C | G | 0.0825 | 0.0152  | 0.0019 | 1.46E-15 |

|             |   |             |   |   |        |         |        |          |
|-------------|---|-------------|---|---|--------|---------|--------|----------|
| rs72898998  | 2 | 186,115,979 | T | C | 0.3958 | 0.0086  | 0.0011 | 8.13E-16 |
| rs6749577   | 2 | 186,489,185 | T | G | 0.4212 | -0.0086 | 0.0011 | 4.49E-16 |
| rs62179650  | 2 | 189,135,884 | A | G | 0.2979 | 0.0087  | 0.0012 | 4.06E-14 |
| rs2014259   | 2 | 191,251,090 | T | G | 0.3704 | -0.0063 | 0.0011 | 5.87E-09 |
| rs62181533  | 2 | 192,905,876 | A | C | 0.5083 | 0.0067  | 0.0010 | 1.89E-10 |
| rs4850810   | 2 | 193,754,771 | T | G | 0.5292 | -0.0131 | 0.0011 | 6.68E-36 |
| rs2264021   | 2 | 194,283,676 | A | G | 0.6778 | 0.0104  | 0.0011 | 1.90E-20 |
| rs73055568  | 2 | 194,641,042 | T | G | 0.0581 | -0.0133 | 0.0023 | 4.93E-09 |
| rs6434728   | 2 | 195,894,145 | T | G | 0.2077 | 0.0069  | 0.0013 | 1.07E-07 |
| rs6756935   | 2 | 196,514,057 | T | C | 0.1370 | -0.0087 | 0.0015 | 1.32E-08 |
| rs2007031   | 2 | 198,181,443 | A | G | 0.6198 | 0.0057  | 0.0011 | 1.40E-07 |
| rs115075036 | 2 | 198,391,102 | A | G | 0.0079 | -0.0264 | 0.0061 | 1.61E-05 |
| rs997467    | 2 | 199,182,704 | T | C | 0.4330 | 0.0104  | 0.0011 | 1.05E-22 |
| rs1455350   | 2 | 199,497,115 | A | T | 0.4866 | -0.0161 | 0.0010 | 2.76E-53 |
| rs17266097  | 2 | 200,275,209 | T | C | 0.3984 | 0.0088  | 0.0011 | 2.00E-16 |
| rs6711399   | 2 | 200,462,840 | T | C | 0.1810 | -0.0129 | 0.0014 | 3.37E-21 |
| rs1653301   | 2 | 201,076,401 | A | G | 0.3882 | -0.0097 | 0.0011 | 1.61E-19 |
| rs34189321  | 2 | 203,036,920 | A | T | 0.8736 | 0.0147  | 0.0016 | 7.84E-21 |
| rs13010214  | 2 | 203,571,962 | C | G | 0.1059 | -0.0078 | 0.0017 | 4.53E-06 |
| rs140540544 | 2 | 205,686,348 | A | G | 0.9621 | -0.0140 | 0.0027 | 3.41E-07 |
| rs78016092  | 2 | 206,429,322 | A | G | 0.0647 | -0.0073 | 0.0021 | 6.47E-04 |
| rs111341724 | 2 | 207,258,925 | T | C | 0.1487 | -0.0091 | 0.0015 | 7.57E-10 |
| rs1263671   | 2 | 207,996,447 | T | C | 0.8335 | -0.0087 | 0.0014 | 5.86E-10 |
| rs10172483  | 2 | 208,300,941 | A | T | 0.7725 | 0.0061  | 0.0012 | 9.14E-07 |
| rs13402422  | 2 | 208,827,123 | T | C | 0.3478 | 0.0065  | 0.0011 | 3.01E-09 |
| rs56016194  | 2 | 210,900,649 | C | G | 0.4416 | -0.0057 | 0.0011 | 7.87E-08 |
| rs2371001   | 2 | 211,467,548 | A | G | 0.5108 | -0.0093 | 0.0010 | 7.15E-19 |
| rs3791702   | 2 | 212,280,780 | T | C | 0.6952 | 0.0084  | 0.0011 | 1.14E-13 |
| rs55897719  | 2 | 212,590,841 | A | C | 0.3055 | -0.0127 | 0.0011 | 2.04E-28 |
| rs17344454  | 2 | 213,001,643 | A | C | 0.9368 | 0.0052  | 0.0022 | 1.49E-02 |
| rs72944349  | 2 | 213,854,123 | T | C | 0.7246 | 0.0069  | 0.0012 | 4.44E-09 |
| rs7597126   | 2 | 215,009,358 | T | C | 0.4971 | -0.0083 | 0.0010 | 2.32E-15 |
| rs139770913 | 2 | 215,232,913 | T | G | 0.0046 | 0.0277  | 0.0079 | 4.96E-04 |
| rs11681287  | 2 | 215,295,184 | A | G | 0.1456 | 0.0126  | 0.0015 | 2.60E-17 |
| rs6713695   | 2 | 215,393,529 | A | G | 0.4684 | -0.0106 | 0.0010 | 5.18E-24 |
| rs736143    | 2 | 217,698,787 | A | G | 0.2058 | -0.0061 | 0.0013 | 2.15E-06 |
| rs897877    | 2 | 219,192,755 | A | G | 0.4182 | -0.0052 | 0.0011 | 1.14E-06 |
| rs1043160   | 2 | 220,037,756 | A | G | 0.3860 | -0.0043 | 0.0011 | 6.35E-05 |
| rs11886864  | 2 | 220,156,531 | A | G | 0.8359 | -0.0084 | 0.0014 | 2.74E-09 |
| rs145979116 | 2 | 220,412,282 | T | G | 0.9788 | -0.0322 | 0.0037 | 3.64E-18 |
| rs6748457   | 2 | 220,793,239 | T | G | 0.3427 | -0.0049 | 0.0011 | 9.20E-06 |
| rs11690112  | 2 | 221,253,683 | T | G | 0.6506 | 0.0069  | 0.0011 | 4.24E-10 |
| rs10153660  | 2 | 221,537,867 | A | G | 0.5124 | -0.0050 | 0.0011 | 1.90E-06 |
| rs1971218   | 2 | 221,835,288 | A | G | 0.5241 | 0.0085  | 0.0011 | 5.79E-16 |
| rs4099413   | 2 | 222,716,083 | A | C | 0.7745 | -0.0061 | 0.0013 | 9.37E-07 |
| rs111915841 | 2 | 225,467,840 | C | G | 0.3327 | 0.0095  | 0.0011 | 8.22E-18 |
| rs12995062  | 2 | 225,547,310 | A | G | 0.8938 | 0.0154  | 0.0017 | 1.78E-19 |
| rs10208109  | 2 | 226,021,611 | T | C | 0.5681 | 0.0035  | 0.0011 | 8.89E-04 |

|             |   |             |   |   |        |         |        |          |
|-------------|---|-------------|---|---|--------|---------|--------|----------|
| rs2163413   | 2 | 226,349,200 | A | G | 0.8185 | -0.0130 | 0.0014 | 9.86E-22 |
| rs12694681  | 2 | 226,609,241 | T | G | 0.6920 | 0.0089  | 0.0011 | 5.78E-15 |
| rs7603395   | 2 | 228,994,703 | A | G | 0.6508 | 0.0121  | 0.0011 | 2.88E-28 |
| rs62201212  | 2 | 229,173,304 | T | C | 0.1375 | 0.0119  | 0.0015 | 4.29E-15 |
| rs116363365 | 2 | 229,317,253 | A | T | 0.1380 | 0.0038  | 0.0015 | 1.18E-02 |
| rs13383306  | 2 | 230,179,536 | A | C | 0.0547 | -0.0136 | 0.0023 | 3.52E-09 |
| rs143970234 | 2 | 230,743,390 | A | G | 0.1237 | 0.0105  | 0.0016 | 4.88E-11 |
| rs7571716   | 2 | 233,441,420 | T | C | 0.2836 | 0.0069  | 0.0012 | 2.46E-09 |
| rs13007783  | 2 | 233,566,679 | A | G | 0.3492 | -0.0145 | 0.0011 | 1.16E-39 |
| rs6704768   | 2 | 233,592,501 | A | G | 0.5664 | -0.0153 | 0.0011 | 9.67E-48 |
| rs4663617   | 2 | 236,744,626 | A | T | 0.2399 | 0.0104  | 0.0012 | 3.17E-17 |
| rs4663220   | 2 | 236,846,042 | T | G | 0.4966 | 0.0068  | 0.0010 | 1.06E-10 |
| rs36116433  | 2 | 236,979,552 | T | C | 0.4525 | -0.0070 | 0.0011 | 3.36E-11 |
| rs6725848   | 2 | 237,079,100 | C | G | 0.1743 | -0.0138 | 0.0014 | 2.08E-23 |
| rs58964929  | 2 | 238,873,673 | A | G | 0.3839 | 0.0062  | 0.0011 | 7.62E-09 |
| rs79747966  | 2 | 239,965,444 | T | C | 0.1521 | -0.0088 | 0.0015 | 1.64E-09 |
| rs72993796  | 2 | 240,321,051 | T | C | 0.8820 | 0.0149  | 0.0016 | 8.58E-20 |
| rs2931203   | 2 | 240,324,316 | A | T | 0.7566 | -0.0092 | 0.0012 | 5.38E-14 |
| rs10182982  | 2 | 242,403,921 | A | T | 0.4438 | -0.0058 | 0.0011 | 3.07E-08 |
| rs7651086   | 3 | 145,558     | C | G | 0.4569 | 0.0065  | 0.0011 | 7.08E-10 |
| rs5004846   | 3 | 2,568,479   | A | G | 0.8240 | -0.0081 | 0.0014 | 3.32E-09 |
| rs769789    | 3 | 3,753,470   | T | C | 0.8107 | -0.0096 | 0.0013 | 7.87E-13 |
| rs1846436   | 3 | 4,787,125   | A | G | 0.6946 | 0.0058  | 0.0011 | 3.71E-07 |
| rs17234990  | 3 | 7,195,141   | T | C | 0.6802 | -0.0084 | 0.0011 | 9.38E-14 |
| rs329036    | 3 | 7,763,665   | T | C | 0.2319 | -0.0061 | 0.0012 | 8.32E-07 |
| rs62236816  | 3 | 8,252,091   | A | G | 0.6485 | -0.0091 | 0.0011 | 9.71E-17 |
| rs2664076   | 3 | 9,133,971   | A | G | 0.3830 | -0.0066 | 0.0011 | 8.49E-10 |
| rs34283953  | 3 | 9,907,511   | T | C | 0.0146 | 0.0176  | 0.0044 | 7.07E-05 |
| rs164938    | 3 | 10,315,103  | T | G | 0.3936 | -0.0081 | 0.0011 | 5.12E-14 |
| rs9813525   | 3 | 13,119,540  | T | C | 0.3127 | 0.0081  | 0.0011 | 6.42E-13 |
| rs62232802  | 3 | 13,338,289  | A | C | 0.1740 | 0.0099  | 0.0014 | 7.25E-13 |
| rs35452994  | 3 | 14,510,442  | A | G | 0.1957 | -0.0091 | 0.0013 | 9.16E-12 |
| rs62241810  | 3 | 14,978,154  | T | C | 0.2574 | 0.0049  | 0.0012 | 3.89E-05 |
| rs116374624 | 3 | 15,031,154  | A | T | 0.0248 | -0.0178 | 0.0034 | 1.33E-07 |
| rs7651039   | 3 | 15,648,004  | T | C | 0.4807 | 0.0046  | 0.0010 | 1.45E-05 |
| rs748832    | 3 | 16,851,202  | A | G | 0.6314 | 0.0101  | 0.0011 | 1.61E-20 |
| rs4685405   | 3 | 16,981,683  | T | G | 0.1850 | -0.0114 | 0.0013 | 2.12E-17 |
| rs114521504 | 3 | 17,408,018  | A | G | 0.9405 | 0.0091  | 0.0022 | 5.12E-05 |
| rs34582652  | 3 | 18,124,170  | A | T | 0.9855 | 0.0322  | 0.0046 | 1.71E-12 |
| rs7634036   | 3 | 18,508,640  | C | G | 0.2394 | -0.0094 | 0.0012 | 2.31E-14 |
| rs5021426   | 3 | 18,700,484  | T | C | 0.7246 | -0.0112 | 0.0012 | 1.66E-21 |
| rs586829    | 3 | 20,553,778  | A | G | 0.6292 | 0.0099  | 0.0011 | 5.49E-20 |
| rs4858241   | 3 | 20,669,071  | T | G | 0.6323 | -0.0072 | 0.0011 | 3.68E-11 |
| rs6767338   | 3 | 21,084,864  | T | C | 0.5901 | -0.0073 | 0.0011 | 6.35E-12 |
| rs72625841  | 3 | 21,430,442  | T | G | 0.7383 | 0.0086  | 0.0012 | 3.78E-13 |
| rs11706806  | 3 | 21,732,444  | A | G | 0.2832 | -0.0065 | 0.0012 | 1.93E-08 |
| rs115364451 | 3 | 21,854,933  | T | C | 0.2050 | 0.0085  | 0.0013 | 5.74E-11 |
| rs73050248  | 3 | 23,208,215  | T | C | 0.8175 | -0.0128 | 0.0014 | 4.40E-21 |

|             |   |            |   |   |        |         |        |           |
|-------------|---|------------|---|---|--------|---------|--------|-----------|
| rs826374    | 3 | 24,163,921 | A | C | 0.7718 | -0.0089 | 0.0012 | 8.82E-13  |
| rs2683530   | 3 | 24,211,739 | T | C | 0.5356 | 0.0069  | 0.0010 | 5.96E-11  |
| rs73036489  | 3 | 24,568,718 | T | C | 0.9264 | -0.0119 | 0.0020 | 2.81E-09  |
| rs13085461  | 3 | 24,950,387 | C | G | 0.4744 | 0.0078  | 0.0010 | 1.13E-13  |
| rs6773363   | 3 | 27,793,632 | T | C | 0.5422 | 0.0065  | 0.0011 | 6.59E-10  |
| rs73055556  | 3 | 28,027,538 | A | G | 0.1377 | 0.0111  | 0.0015 | 2.51E-13  |
| rs11921695  | 3 | 28,716,202 | T | C | 0.0905 | -0.0112 | 0.0018 | 8.48E-10  |
| rs10865834  | 3 | 31,599,298 | A | G | 0.2525 | -0.0105 | 0.0012 | 3.58E-18  |
| rs4678463   | 3 | 34,270,633 | T | G | 0.2518 | -0.0095 | 0.0012 | 3.22E-15  |
| rs7614270   | 3 | 35,025,388 | A | C | 0.1481 | -0.0102 | 0.0015 | 5.65E-12  |
| rs9818103   | 3 | 35,671,945 | A | G | 0.7522 | 0.0061  | 0.0012 | 4.45E-07  |
| rs113054910 | 3 | 36,531,717 | T | C | 0.9895 | 0.0238  | 0.0052 | 4.73E-06  |
| rs9985296   | 3 | 36,889,621 | T | C | 0.3825 | -0.0103 | 0.0011 | 9.86E-22  |
| rs7621270   | 3 | 38,709,928 | A | G | 0.7971 | 0.0070  | 0.0013 | 7.17E-08  |
| rs9853735   | 3 | 42,245,515 | T | C | 0.3222 | -0.0044 | 0.0011 | 9.75E-05  |
| rs115824515 | 3 | 44,413,626 | T | C | 0.0228 | -0.0162 | 0.0035 | 4.72E-06  |
| rs75782645  | 3 | 44,940,602 | A | G | 0.8756 | -0.0107 | 0.0016 | 1.82E-11  |
| rs11130144  | 3 | 47,667,934 | T | C | 0.3363 | -0.0123 | 0.0011 | 1.32E-28  |
| rs73078367  | 3 | 48,708,347 | T | C | 0.1182 | 0.0306  | 0.0016 | 1.30E-78  |
| rs34890793  | 3 | 49,619,493 | T | C | 0.8377 | 0.0261  | 0.0014 | 2.78E-75  |
| rs9837520   | 3 | 49,722,356 | A | G | 0.2821 | 0.0295  | 0.0012 | 2.89E-140 |
| rs79581555  | 3 | 49,738,816 | A | G | 0.0508 | -0.0342 | 0.0024 | 1.97E-45  |
| rs7627910   | 3 | 49,971,831 | T | C | 0.5482 | 0.0262  | 0.0011 | 3.69E-137 |
| rs56122560  | 3 | 50,316,007 | T | G | 0.8937 | -0.0162 | 0.0019 | 6.19E-18  |
| rs2710332   | 3 | 52,978,691 | A | G | 0.7212 | 0.0066  | 0.0012 | 1.65E-08  |
| rs62252819  | 3 | 53,440,128 | A | T | 0.7517 | -0.0070 | 0.0012 | 8.47E-09  |
| rs2633723   | 3 | 53,754,418 | T | C | 0.6118 | 0.0087  | 0.0011 | 4.36E-16  |
| rs78080987  | 3 | 54,228,328 | A | C | 0.0011 | -0.0680 | 0.0183 | 1.93E-04  |
| rs6445633   | 3 | 54,230,638 | A | C | 0.3113 | 0.0096  | 0.0011 | 1.40E-17  |
| rs1473346   | 3 | 54,410,633 | T | G | 0.7877 | -0.0071 | 0.0013 | 2.33E-08  |
| rs1851043   | 3 | 54,633,739 | A | G | 0.6107 | 0.0040  | 0.0011 | 1.70E-04  |
| rs2172122   | 3 | 56,576,175 | C | G | 0.3610 | -0.0092 | 0.0011 | 2.21E-17  |
| rs17235841  | 3 | 57,186,580 | A | C | 0.7869 | 0.0062  | 0.0013 | 1.42E-06  |
| rs6808671   | 3 | 58,231,112 | T | C | 0.3680 | -0.0089 | 0.0011 | 1.74E-16  |
| rs59760856  | 3 | 58,283,496 | A | C | 0.6047 | -0.0003 | 0.0011 | 8.02E-01  |
| rs9822855   | 3 | 58,327,540 | T | C | 0.3007 | 0.0020  | 0.0011 | 8.06E-02  |
| rs13071861  | 3 | 58,371,332 | C | G | 0.8519 | 0.0111  | 0.0015 | 6.09E-14  |
| rs11130785  | 3 | 60,807,883 | T | G | 0.6233 | 0.0059  | 0.0011 | 5.73E-08  |
| rs2736752   | 3 | 60,817,322 | T | G | 0.7840 | 0.0090  | 0.0013 | 1.27E-12  |
| rs35580497  | 3 | 62,331,761 | A | G | 0.1452 | -0.0081 | 0.0015 | 6.58E-08  |
| rs9848406   | 3 | 62,457,846 | C | G | 0.0505 | -0.0122 | 0.0024 | 3.93E-07  |
| rs6774533   | 3 | 62,471,086 | T | C | 0.6964 | 0.0084  | 0.0011 | 1.37E-13  |
| rs1512021   | 3 | 62,544,818 | A | C | 0.8697 | -0.0065 | 0.0016 | 3.05E-05  |
| rs2087704   | 3 | 63,820,493 | T | G | 0.2064 | 0.0056  | 0.0013 | 1.97E-05  |
| rs853286    | 3 | 64,285,502 | T | G | 0.8908 | 0.0119  | 0.0017 | 1.35E-12  |
| rs59110590  | 3 | 64,434,481 | A | G | 0.5644 | -0.0095 | 0.0011 | 2.14E-19  |
| rs3923375   | 3 | 65,412,603 | T | C | 0.1314 | -0.0083 | 0.0016 | 1.23E-07  |
| rs6765502   | 3 | 65,662,123 | T | C | 0.1816 | -0.0100 | 0.0014 | 1.99E-13  |

|             |   |             |   |   |        |         |        |          |
|-------------|---|-------------|---|---|--------|---------|--------|----------|
| rs77554090  | 3 | 65,711,935  | T | C | 0.0733 | -0.0175 | 0.0020 | 2.84E-18 |
| rs1444048   | 3 | 66,919,377  | T | C | 0.4402 | -0.0059 | 0.0011 | 1.85E-08 |
| rs7628995   | 3 | 68,323,423  | A | G | 0.6560 | 0.0087  | 0.0011 | 3.31E-15 |
| rs9841097   | 3 | 68,809,059  | A | T | 0.4154 | 0.0082  | 0.0011 | 1.33E-14 |
| rs73117392  | 3 | 70,002,020  | T | C | 0.9437 | -0.0231 | 0.0023 | 3.56E-24 |
| rs902712    | 3 | 70,033,238  | A | G | 0.7314 | 0.0108  | 0.0012 | 5.55E-20 |
| rs1522341   | 3 | 70,348,079  | T | C | 0.2682 | -0.0056 | 0.0012 | 2.61E-06 |
| rs12494424  | 3 | 70,520,917  | C | G | 0.0403 | -0.0223 | 0.0027 | 9.31E-17 |
| rs56090516  | 3 | 70,543,128  | T | C | 0.6681 | -0.0102 | 0.0011 | 4.45E-20 |
| rs3846031   | 3 | 71,014,581  | T | G | 0.6777 | -0.0091 | 0.0011 | 4.51E-16 |
| rs35540156  | 3 | 71,522,178  | A | G | 0.5223 | -0.0164 | 0.0010 | 6.10E-55 |
| rs6798993   | 3 | 72,161,623  | T | G | 0.5234 | 0.0046  | 0.0010 | 1.18E-05 |
| rs11709621  | 3 | 72,344,601  | T | C | 0.2031 | -0.0096 | 0.0013 | 1.83E-13 |
| rs35938805  | 3 | 73,044,493  | T | C | 0.6181 | -0.0081 | 0.0011 | 1.48E-12 |
| rs35319165  | 3 | 74,251,969  | A | C | 0.8592 | 0.0069  | 0.0015 | 4.04E-06 |
| rs11918452  | 3 | 74,882,285  | A | G | 0.8243 | -0.0103 | 0.0014 | 8.59E-14 |
| rs9859719   | 3 | 75,039,122  | A | G | 0.2223 | -0.0113 | 0.0013 | 3.67E-19 |
| rs2324471   | 3 | 76,115,894  | T | G | 0.4050 | -0.0052 | 0.0011 | 1.34E-06 |
| rs34587302  | 3 | 76,301,993  | A | G | 0.4555 | 0.0057  | 0.0011 | 7.33E-08 |
| rs267152    | 3 | 76,857,965  | A | C | 0.8618 | -0.0089 | 0.0015 | 4.79E-09 |
| rs5009152   | 3 | 77,000,266  | A | G | 0.4143 | -0.0060 | 0.0011 | 1.79E-08 |
| rs13073489  | 3 | 77,257,303  | A | G | 0.7401 | -0.0095 | 0.0012 | 2.27E-15 |
| rs9836455   | 3 | 77,713,882  | C | G | 0.6349 | -0.0062 | 0.0011 | 1.14E-08 |
| rs17835368  | 3 | 78,444,548  | A | C | 0.3344 | 0.0097  | 0.0011 | 2.75E-18 |
| rs7644615   | 3 | 79,580,821  | A | C | 0.3976 | -0.0080 | 0.0011 | 8.74E-14 |
| rs73126025  | 3 | 81,260,636  | A | G | 0.1316 | -0.0081 | 0.0015 | 1.87E-07 |
| rs11711322  | 3 | 82,554,634  | T | C | 0.5957 | -0.0108 | 0.0011 | 2.59E-24 |
| rs13097360  | 3 | 82,616,037  | T | G | 0.2760 | -0.0100 | 0.0012 | 1.19E-17 |
| rs9871316   | 3 | 83,152,948  | A | G | 0.4577 | 0.0066  | 0.0011 | 2.75E-10 |
| rs57319644  | 3 | 84,664,410  | A | G | 0.4181 | 0.0094  | 0.0011 | 5.59E-19 |
| rs67379620  | 3 | 85,393,911  | T | C | 0.1400 | 0.0033  | 0.0015 | 3.03E-02 |
| rs74664784  | 3 | 85,475,292  | T | C | 0.4365 | -0.0084 | 0.0012 | 5.09E-12 |
| rs66568921  | 3 | 85,672,018  | T | G | 0.6470 | -0.0156 | 0.0011 | 2.59E-45 |
| rs9847867   | 3 | 86,269,515  | A | G | 0.1062 | -0.0138 | 0.0017 | 4.44E-16 |
| rs1492014   | 3 | 94,071,481  | T | C | 0.5767 | 0.0073  | 0.0011 | 6.19E-12 |
| rs4857303   | 3 | 97,676,153  | C | G | 0.5040 | 0.0052  | 0.0011 | 7.05E-07 |
| rs1144127   | 3 | 100,482,076 | A | G | 0.4486 | -0.0087 | 0.0011 | 1.01E-16 |
| rs72960180  | 3 | 103,396,334 | A | G | 0.2376 | -0.0129 | 0.0012 | 1.20E-25 |
| rs2961221   | 3 | 104,231,441 | A | G | 0.4059 | 0.0063  | 0.0011 | 4.36E-09 |
| rs9862599   | 3 | 104,864,331 | T | G | 0.8844 | 0.0064  | 0.0016 | 1.01E-04 |
| rs7431531   | 3 | 105,198,374 | T | C | 0.6791 | -0.0105 | 0.0011 | 9.10E-21 |
| rs9809578   | 3 | 106,091,984 | A | G | 0.4423 | 0.0077  | 0.0011 | 3.62E-13 |
| rs62261974  | 3 | 107,296,969 | A | G | 0.8218 | 0.0095  | 0.0014 | 3.34E-12 |
| rs115876159 | 3 | 107,307,336 | C | G | 0.0087 | -0.0209 | 0.0057 | 2.50E-04 |
| rs765091    | 3 | 107,785,611 | C | G | 0.4838 | -0.0081 | 0.0010 | 8.33E-15 |
| rs75965832  | 3 | 107,987,349 | T | C | 0.0621 | -0.0101 | 0.0022 | 3.41E-06 |
| rs7632819   | 3 | 108,071,811 | A | G | 0.7550 | -0.0130 | 0.0012 | 1.13E-26 |
| rs2669890   | 3 | 114,333,798 | A | T | 0.2176 | 0.0093  | 0.0013 | 1.70E-13 |

|             |   |             |   |   |        |         |        |          |
|-------------|---|-------------|---|---|--------|---------|--------|----------|
| rs143396396 | 3 | 115,003,471 | A | G | 0.0139 | -0.0100 | 0.0045 | 2.62E-02 |
| rs138657373 | 3 | 115,126,260 | T | C | 0.0055 | -0.0265 | 0.0072 | 2.44E-04 |
| rs112842843 | 3 | 115,332,805 | T | C | 0.2196 | 0.0065  | 0.0013 | 4.29E-07 |
| rs11719629  | 3 | 115,951,432 | T | C | 0.1751 | 0.0037  | 0.0014 | 6.53E-03 |
| rs7430651   | 3 | 116,582,186 | T | C | 0.2866 | -0.0113 | 0.0012 | 2.22E-22 |
| rs4855928   | 3 | 116,898,327 | T | G | 0.5176 | 0.0064  | 0.0011 | 1.28E-09 |
| rs13077567  | 3 | 117,174,468 | A | G | 0.6801 | 0.0076  | 0.0011 | 1.08E-11 |
| rs1910038   | 3 | 117,307,834 | A | C | 0.4281 | -0.0065 | 0.0011 | 9.45E-10 |
| rs6783146   | 3 | 117,628,528 | T | G | 0.2994 | 0.0051  | 0.0011 | 6.64E-06 |
| rs13091704  | 3 | 118,419,383 | A | C | 0.2491 | -0.0114 | 0.0012 | 6.57E-21 |
| rs71329247  | 3 | 121,681,523 | T | C | 0.2621 | 0.0058  | 0.0012 | 9.32E-07 |
| rs6438720   | 3 | 122,017,232 | A | C | 0.3848 | -0.0023 | 0.0011 | 3.04E-02 |
| rs4634051   | 3 | 122,180,728 | A | G | 0.3041 | 0.0070  | 0.0011 | 6.55E-10 |
| rs9823891   | 3 | 123,734,690 | A | G | 0.2836 | -0.0115 | 0.0012 | 3.76E-23 |
| rs2333218   | 3 | 125,127,132 | T | C | 0.5362 | -0.0048 | 0.0011 | 4.14E-06 |
| rs61664009  | 3 | 126,901,070 | A | G | 0.7742 | 0.0095  | 0.0013 | 2.65E-14 |
| rs6785699   | 3 | 127,062,401 | A | G | 0.2003 | 0.0105  | 0.0013 | 9.16E-16 |
| rs62262312  | 3 | 127,145,909 | C | G | 0.1620 | 0.0189  | 0.0014 | 2.36E-40 |
| rs62265565  | 3 | 129,441,539 | T | G | 0.9361 | -0.0135 | 0.0021 | 2.51E-10 |
| rs3773814   | 3 | 130,715,748 | A | C | 0.8413 | 0.0070  | 0.0014 | 1.40E-06 |
| rs16837395  | 3 | 131,378,324 | C | G | 0.4256 | -0.0082 | 0.0011 | 1.24E-14 |
| rs7617481   | 3 | 131,706,617 | C | G | 0.5412 | -0.0083 | 0.0011 | 2.22E-15 |
| rs905993    | 3 | 131,966,747 | C | G | 0.3892 | -0.0096 | 0.0011 | 3.21E-19 |
| rs9883745   | 3 | 132,232,323 | A | G | 0.3362 | -0.0059 | 0.0011 | 8.39E-08 |
| rs998591    | 3 | 135,103,031 | T | C | 0.2773 | -0.0062 | 0.0012 | 1.24E-07 |
| rs6772753   | 3 | 137,318,965 | A | G | 0.5431 | 0.0074  | 0.0011 | 1.86E-12 |
| rs1947555   | 3 | 137,413,903 | T | C | 0.0837 | -0.0114 | 0.0019 | 1.58E-09 |
| rs2071387   | 3 | 139,257,603 | A | G | 0.8179 | 0.0090  | 0.0014 | 2.94E-11 |
| rs6807857   | 3 | 139,557,781 | A | G | 0.4471 | 0.0029  | 0.0011 | 6.52E-03 |
| rs7641534   | 3 | 139,700,752 | T | C | 0.4567 | -0.0079 | 0.0011 | 4.60E-14 |
| rs7650602   | 3 | 141,147,414 | T | C | 0.5651 | -0.0100 | 0.0011 | 3.19E-21 |
| rs2862130   | 3 | 141,645,533 | A | G | 0.4760 | -0.0072 | 0.0010 | 7.83E-12 |
| rs2119380   | 3 | 143,237,653 | T | G | 0.5179 | 0.0039  | 0.0010 | 1.75E-04 |
| rs6788064   | 3 | 143,476,411 | A | G | 0.4898 | -0.0070 | 0.0010 | 2.69E-11 |
| rs34743418  | 3 | 143,657,807 | T | C | 0.4367 | -0.0100 | 0.0011 | 5.01E-21 |
| rs34620457  | 3 | 145,133,629 | A | G | 0.2479 | 0.0071  | 0.0012 | 5.39E-09 |
| rs73153727  | 3 | 147,652,324 | T | C | 0.0184 | -0.0239 | 0.0039 | 1.32E-09 |
| rs12054166  | 3 | 150,093,445 | C | G | 0.7352 | 0.0073  | 0.0012 | 7.32E-10 |
| rs66523149  | 3 | 152,909,603 | T | C | 0.6817 | -0.0068 | 0.0011 | 1.40E-09 |
| rs80104521  | 3 | 153,916,205 | A | C | 0.7876 | -0.0087 | 0.0013 | 1.34E-11 |
| rs10936002  | 3 | 155,129,439 | T | C | 0.3637 | 0.0069  | 0.0011 | 1.79E-10 |
| rs6805849   | 3 | 155,345,186 | A | G | 0.1822 | -0.0024 | 0.0014 | 8.17E-02 |
| rs2639655   | 3 | 158,385,966 | C | G | 0.8065 | 0.0092  | 0.0013 | 3.54E-12 |
| rs1109156   | 3 | 159,572,120 | T | C | 0.2080 | 0.0082  | 0.0013 | 1.81E-10 |
| rs60028768  | 3 | 160,318,999 | A | G | 0.3451 | 0.0060  | 0.0011 | 4.44E-08 |
| rs981949    | 3 | 161,196,597 | A | C | 0.6750 | 0.0093  | 0.0011 | 6.82E-17 |
| rs9881048   | 3 | 165,506,252 | A | C | 0.1940 | -0.0118 | 0.0013 | 3.72E-19 |
| rs9863879   | 3 | 166,117,342 | T | C | 0.1525 | 0.0080  | 0.0015 | 3.49E-08 |

|            |   |             |   |   |        |         |        |          |
|------------|---|-------------|---|---|--------|---------|--------|----------|
| rs77566578 | 3 | 167,118,004 | T | C | 0.8737 | 0.0086  | 0.0016 | 5.00E-08 |
| rs1426805  | 3 | 168,167,872 | A | G | 0.1487 | 0.0097  | 0.0015 | 4.36E-11 |
| rs7643249  | 3 | 169,813,340 | T | C | 0.4272 | 0.0063  | 0.0011 | 2.49E-09 |
| rs5396     | 3 | 170,744,815 | T | C | 0.7158 | 0.0073  | 0.0012 | 3.87E-10 |
| rs6779981  | 3 | 171,054,056 | T | C | 0.5966 | 0.0068  | 0.0011 | 2.39E-10 |
| rs1523341  | 3 | 173,228,908 | T | G | 0.4713 | 0.0055  | 0.0010 | 1.80E-07 |
| rs4894651  | 3 | 173,912,821 | T | C | 0.4397 | 0.0091  | 0.0011 | 4.09E-18 |
| rs6782698  | 3 | 175,673,379 | A | G | 0.7537 | 0.0138  | 0.0012 | 4.81E-30 |
| rs9857331  | 3 | 177,191,935 | A | G | 0.7294 | -0.0081 | 0.0012 | 5.37E-12 |
| rs35792166 | 3 | 178,271,216 | T | C | 0.3678 | 0.0068  | 0.0011 | 2.80E-10 |
| rs66667727 | 3 | 178,797,216 | C | G | 0.3593 | 0.0070  | 0.0011 | 1.71E-10 |
| rs7431270  | 3 | 180,046,708 | A | G | 0.2925 | -0.0058 | 0.0012 | 4.69E-07 |
| rs2567660  | 3 | 180,912,675 | C | G | 0.1512 | -0.0150 | 0.0015 | 1.22E-24 |
| rs4855037  | 3 | 181,466,810 | T | G | 0.4250 | -0.0061 | 0.0011 | 8.48E-09 |
| rs9818890  | 3 | 182,523,868 | A | G | 0.3313 | 0.0088  | 0.0011 | 3.07E-15 |
| rs28603130 | 3 | 183,950,306 | C | G | 0.7492 | 0.0086  | 0.0012 | 9.87E-13 |
| rs2293605  | 3 | 184,044,433 | T | C | 0.1214 | -0.0086 | 0.0016 | 7.75E-08 |
| rs35375378 | 3 | 184,500,518 | A | C | 0.4915 | 0.0055  | 0.0010 | 1.18E-07 |
| rs872602   | 3 | 185,826,028 | A | G | 0.2405 | -0.0126 | 0.0012 | 1.11E-24 |
| rs12330875 | 3 | 186,285,986 | T | C | 0.1704 | 0.0062  | 0.0014 | 7.52E-06 |
| rs4358291  | 3 | 187,501,864 | A | T | 0.8840 | 0.0112  | 0.0016 | 7.27E-12 |
| rs59903652 | 3 | 188,314,676 | T | G | 0.3628 | -0.0054 | 0.0011 | 8.91E-07 |
| rs12107377 | 3 | 192,150,817 | A | G | 0.5155 | 0.0064  | 0.0010 | 1.12E-09 |
| rs4106105  | 3 | 192,309,011 | A | G | 0.2518 | -0.0063 | 0.0012 | 2.01E-07 |
| rs11925699 | 3 | 193,321,115 | A | G | 0.4667 | -0.0077 | 0.0010 | 2.73E-13 |
| rs687610   | 3 | 193,515,781 | C | G | 0.5764 | 0.0042  | 0.0011 | 8.89E-05 |
| rs73210523 | 3 | 196,876,600 | A | G | 0.1741 | 0.0118  | 0.0014 | 9.72E-18 |
| rs12646225 | 4 | 696,848     | T | C | 0.1099 | 0.0118  | 0.0017 | 3.69E-12 |
| rs62294060 | 4 | 744,190     | A | G | 0.0854 | -0.0110 | 0.0019 | 3.92E-09 |
| rs3135878  | 4 | 1,804,377   | A | G | 0.7858 | -0.0068 | 0.0013 | 1.81E-07 |
| rs4302516  | 4 | 2,557,363   | C | G | 0.3918 | -0.0078 | 0.0011 | 6.63E-13 |
| rs13140733 | 4 | 2,920,937   | A | G | 0.2500 | -0.0136 | 0.0012 | 4.70E-29 |
| rs34155847 | 4 | 3,252,130   | A | G | 0.2401 | 0.0158  | 0.0012 | 8.40E-38 |
| rs76034781 | 4 | 3,272,782   | A | G | 0.0766 | -0.0218 | 0.0020 | 2.20E-28 |
| rs1055711  | 4 | 3,433,782   | A | T | 0.2560 | -0.0063 | 0.0012 | 1.45E-07 |
| rs4689684  | 4 | 4,485,880   | T | C | 0.7656 | 0.0080  | 0.0012 | 7.64E-11 |
| rs4689949  | 4 | 4,842,568   | A | G | 0.5442 | 0.0046  | 0.0011 | 9.74E-06 |
| rs73208982 | 4 | 5,213,120   | C | G | 0.6626 | -0.0139 | 0.0011 | 4.75E-36 |
| rs195125   | 4 | 5,431,324   | A | G | 0.5329 | -0.0052 | 0.0010 | 8.92E-07 |
| rs62286094 | 4 | 6,502,170   | T | C | 0.1586 | 0.0082  | 0.0014 | 1.19E-08 |
| rs3756255  | 4 | 7,032,924   | A | T | 0.7125 | 0.0057  | 0.0012 | 8.57E-07 |
| rs73208473 | 4 | 7,324,596   | A | C | 0.2795 | -0.0067 | 0.0012 | 8.75E-09 |
| rs10937825 | 4 | 7,489,746   | A | G | 0.4439 | 0.0053  | 0.0011 | 4.93E-07 |
| rs28494514 | 4 | 7,889,715   | A | G | 0.4388 | 0.0062  | 0.0011 | 3.70E-09 |
| rs11731597 | 4 | 10,075,485  | T | C | 0.2947 | 0.0084  | 0.0011 | 1.85E-13 |
| rs6846243  | 4 | 11,053,537  | A | G | 0.6941 | -0.0054 | 0.0011 | 1.82E-06 |
| rs79397771 | 4 | 11,338,903  | T | C | 0.8081 | 0.0075  | 0.0013 | 2.06E-08 |
| rs1454881  | 4 | 12,308,811  | T | C | 0.4033 | 0.0066  | 0.0011 | 6.66E-10 |

|             |   |            |   |   |        |         |        |          |
|-------------|---|------------|---|---|--------|---------|--------|----------|
| rs1491254   | 4 | 13,726,403 | T | C | 0.3310 | -0.0043 | 0.0011 | 1.15E-04 |
| rs2604541   | 4 | 15,082,038 | T | C | 0.5625 | 0.0055  | 0.0011 | 1.83E-07 |
| rs61240629  | 4 | 15,401,534 | A | C | 0.3233 | 0.0077  | 0.0011 | 5.28E-12 |
| rs2314645   | 4 | 15,538,922 | T | G | 0.5593 | -0.0087 | 0.0011 | 1.13E-16 |
| rs2313547   | 4 | 16,427,592 | T | C | 0.5026 | 0.0063  | 0.0010 | 1.72E-09 |
| rs1581168   | 4 | 17,053,079 | T | C | 0.2879 | -0.0101 | 0.0012 | 2.22E-18 |
| rs2872794   | 4 | 17,330,007 | A | T | 0.4776 | 0.0053  | 0.0010 | 4.23E-07 |
| rs73242122  | 4 | 17,871,012 | C | G | 0.7774 | -0.0068 | 0.0013 | 7.28E-08 |
| rs13131350  | 4 | 17,877,487 | A | G | 0.8615 | 0.0140  | 0.0015 | 2.03E-20 |
| rs2610990   | 4 | 18,008,232 | A | G | 0.2583 | 0.0116  | 0.0012 | 3.46E-22 |
| rs35177116  | 4 | 19,339,780 | T | C | 0.2753 | -0.0082 | 0.0012 | 3.42E-12 |
| rs9994056   | 4 | 21,088,839 | A | G | 0.5858 | 0.0062  | 0.0011 | 5.46E-09 |
| rs28448822  | 4 | 21,787,065 | A | C | 0.8692 | 0.0098  | 0.0016 | 2.24E-10 |
| rs4467547   | 4 | 21,945,933 | T | G | 0.4053 | 0.0132  | 0.0011 | 3.44E-35 |
| rs967140    | 4 | 23,757,308 | A | C | 0.8290 | -0.0118 | 0.0014 | 3.06E-17 |
| rs113938700 | 4 | 24,274,403 | T | C | 0.0427 | -0.0139 | 0.0026 | 8.33E-08 |
| rs6833208   | 4 | 24,346,318 | T | C | 0.5860 | -0.0032 | 0.0011 | 2.56E-03 |
| rs931848    | 4 | 24,483,033 | A | T | 0.5579 | -0.0077 | 0.0011 | 2.47E-13 |
| rs7665498   | 4 | 25,001,578 | T | C | 0.4199 | -0.0063 | 0.0011 | 2.30E-09 |
| rs9291467   | 4 | 25,428,296 | T | C | 0.4587 | -0.0077 | 0.0011 | 3.01E-13 |
| rs62409395  | 4 | 25,605,036 | T | C | 0.7618 | 0.0106  | 0.0013 | 7.21E-17 |
| rs28496468  | 4 | 25,890,349 | A | T | 0.2089 | -0.0071 | 0.0013 | 3.16E-08 |
| rs11732420  | 4 | 26,439,995 | T | C | 0.0379 | 0.0128  | 0.0028 | 3.67E-06 |
| rs10939186  | 4 | 27,987,100 | T | C | 0.3531 | -0.0093 | 0.0011 | 1.76E-17 |
| rs1493159   | 4 | 28,719,509 | T | C | 0.8453 | 0.0150  | 0.0014 | 2.83E-25 |
| rs6448619   | 4 | 28,972,033 | T | C | 0.3325 | -0.0067 | 0.0011 | 1.95E-09 |
| rs11733439  | 4 | 30,534,692 | A | G | 0.7881 | -0.0126 | 0.0013 | 1.04E-22 |
| rs9996030   | 4 | 30,919,362 | T | C | 0.6646 | 0.0109  | 0.0011 | 8.38E-23 |
| rs10015750  | 4 | 31,360,079 | A | C | 0.2671 | 0.0066  | 0.0012 | 2.78E-08 |
| rs7680258   | 4 | 31,890,470 | T | C | 0.4237 | 0.0072  | 0.0011 | 8.92E-12 |
| rs4621481   | 4 | 32,160,307 | T | G | 0.7149 | 0.0081  | 0.0012 | 2.33E-12 |
| rs6839051   | 4 | 35,026,277 | A | C | 0.3828 | -0.0069 | 0.0011 | 1.44E-10 |
| rs1113371   | 4 | 35,462,039 | A | C | 0.5089 | 0.0113  | 0.0010 | 5.12E-27 |
| rs55900829  | 4 | 35,514,712 | A | T | 0.5097 | 0.0127  | 0.0012 | 1.15E-25 |
| rs187499510 | 4 | 35,892,871 | C | G | 0.9921 | 0.0296  | 0.0061 | 1.41E-06 |
| rs1613447   | 4 | 37,196,241 | A | T | 0.4238 | 0.0076  | 0.0011 | 7.66E-13 |
| rs78462816  | 4 | 38,300,662 | A | G | 0.8806 | -0.0104 | 0.0016 | 1.42E-10 |
| rs73230709  | 4 | 38,514,577 | C | G | 0.8187 | 0.0069  | 0.0014 | 3.70E-07 |
| rs170035    | 4 | 39,793,856 | A | G | 0.6208 | 0.0085  | 0.0011 | 4.01E-15 |
| rs10517554  | 4 | 41,071,428 | T | C | 0.3711 | -0.0069 | 0.0011 | 1.93E-10 |
| rs34937911  | 4 | 42,110,353 | T | C | 0.8840 | 0.0087  | 0.0016 | 1.21E-07 |
| rs2290869   | 4 | 42,576,522 | T | C | 0.3816 | 0.0058  | 0.0011 | 7.42E-08 |
| rs55637944  | 4 | 44,624,808 | C | G | 0.8654 | -0.0084 | 0.0015 | 3.64E-08 |
| rs13130765  | 4 | 45,163,333 | C | G | 0.4734 | -0.0072 | 0.0011 | 7.21E-12 |
| rs6820046   | 4 | 45,971,193 | T | C | 0.5678 | -0.0092 | 0.0011 | 2.60E-18 |
| rs1877397   | 4 | 46,937,620 | A | G | 0.8663 | -0.0065 | 0.0015 | 2.11E-05 |
| rs2055940   | 4 | 46,997,913 | A | G | 0.3231 | 0.0070  | 0.0011 | 3.32E-10 |
| rs115652757 | 4 | 48,337,510 | T | C | 0.9776 | -0.0150 | 0.0035 | 2.28E-05 |



|             |   |             |   |   |        |         |        |          |
|-------------|---|-------------|---|---|--------|---------|--------|----------|
| rs2291591   | 4 | 55,147,769  | T | C | 0.0915 | 0.0067  | 0.0018 | 2.43E-04 |
| rs4864881   | 4 | 55,200,455  | T | C | 0.6067 | -0.0070 | 0.0011 | 7.74E-11 |
| rs62305701  | 4 | 60,266,134  | A | G | 0.6625 | 0.0056  | 0.0011 | 5.10E-07 |
| rs6551620   | 4 | 62,161,216  | A | T | 0.4421 | -0.0064 | 0.0011 | 1.17E-09 |
| rs4860418   | 4 | 62,421,204  | T | C | 0.4884 | -0.0064 | 0.0010 | 1.11E-09 |
| rs1594372   | 4 | 65,616,608  | A | G | 0.5307 | 0.0081  | 0.0010 | 8.70E-15 |
| rs1440936   | 4 | 65,895,830  | A | G | 0.5955 | -0.0053 | 0.0011 | 5.23E-07 |
| rs75447928  | 4 | 66,526,092  | C | G | 0.3148 | -0.0095 | 0.0011 | 3.03E-17 |
| rs13132143  | 4 | 66,808,978  | A | G | 0.5224 | -0.0056 | 0.0010 | 9.22E-08 |
| rs2350804   | 4 | 67,075,938  | T | C | 0.7068 | 0.0094  | 0.0011 | 4.10E-16 |
| rs12506222  | 4 | 67,899,250  | T | C | 0.4417 | -0.0142 | 0.0011 | 1.50E-41 |
| rs2194888   | 4 | 68,013,282  | T | C | 0.2359 | -0.0121 | 0.0012 | 1.31E-22 |
| rs28448514  | 4 | 72,356,070  | A | G | 0.8501 | -0.0087 | 0.0015 | 2.79E-09 |
| rs12510869  | 4 | 77,024,534  | A | G | 0.8771 | 0.0093  | 0.0016 | 6.44E-09 |
| rs4343750   | 4 | 78,058,704  | T | C | 0.0779 | -0.0071 | 0.0020 | 2.63E-04 |
| rs6533225   | 4 | 78,642,389  | C | G | 0.5377 | 0.0075  | 0.0011 | 7.90E-13 |
| rs115024192 | 4 | 79,714,654  | A | T | 0.0347 | 0.0170  | 0.0030 | 1.00E-08 |
| rs1542636   | 4 | 80,204,953  | A | T | 0.4583 | 0.0069  | 0.0011 | 5.20E-11 |
| rs66968950  | 4 | 80,909,460  | A | C | 0.6366 | 0.0086  | 0.0011 | 3.56E-15 |
| rs1458042   | 4 | 81,112,887  | T | C | 0.3365 | 0.0050  | 0.0011 | 7.14E-06 |
| rs10016570  | 4 | 82,312,766  | A | C | 0.6597 | 0.0119  | 0.0011 | 4.93E-27 |
| rs62319698  | 4 | 83,119,706  | T | C | 0.8750 | -0.0056 | 0.0016 | 4.94E-04 |
| rs36048136  | 4 | 83,288,006  | A | G | 0.2269 | 0.0118  | 0.0013 | 4.70E-21 |
| rs11722905  | 4 | 87,791,982  | T | C | 0.0994 | -0.0066 | 0.0018 | 1.79E-04 |
| rs356182    | 4 | 90,626,111  | A | G | 0.6561 | -0.0044 | 0.0011 | 6.16E-05 |
| rs17202137  | 4 | 90,941,366  | T | C | 0.6093 | -0.0064 | 0.0011 | 2.77E-09 |
| rs13125074  | 4 | 91,808,902  | A | G | 0.2328 | 0.0089  | 0.0012 | 6.98E-13 |
| rs114041190 | 4 | 93,816,239  | A | G | 0.0198 | 0.0182  | 0.0038 | 1.53E-06 |
| rs1972863   | 4 | 94,579,511  | A | G | 0.3049 | -0.0095 | 0.0011 | 8.81E-17 |
| rs3796432   | 4 | 96,030,402  | T | G | 0.3714 | 0.0068  | 0.0011 | 2.67E-10 |
| rs7669620   | 4 | 96,704,454  | A | G | 0.4252 | 0.0054  | 0.0011 | 3.55E-07 |
| rs9992967   | 4 | 96,979,429  | T | G | 0.7860 | 0.0082  | 0.0013 | 1.29E-10 |
| rs116338908 | 4 | 97,653,763  | A | G | 0.0307 | -0.0145 | 0.0030 | 2.06E-06 |
| rs6822114   | 4 | 101,454,533 | T | C | 0.4965 | -0.0063 | 0.0010 | 2.12E-09 |
| rs13135092  | 4 | 103,198,082 | A | G | 0.9129 | 0.0299  | 0.0019 | 4.44E-58 |
| rs4698891   | 4 | 104,197,942 | C | G | 0.2461 | 0.0065  | 0.0012 | 1.29E-07 |
| rs11732860  | 4 | 105,378,552 | T | C | 0.2208 | 0.0062  | 0.0013 | 8.37E-07 |
| rs115794885 | 4 | 106,094,414 | T | C | 0.0533 | 0.0235  | 0.0023 | 5.60E-24 |
| rs7670522   | 4 | 106,160,365 | A | C | 0.4727 | 0.0127  | 0.0012 | 6.07E-27 |
| rs145324997 | 4 | 108,837,903 | T | C | 0.9860 | -0.0204 | 0.0046 | 8.55E-06 |
| rs10024722  | 4 | 110,524,470 | T | C | 0.2548 | -0.0043 | 0.0012 | 2.95E-04 |
| rs72678864  | 4 | 112,422,145 | A | G | 0.1606 | 0.0092  | 0.0014 | 9.65E-11 |
| rs4833399   | 4 | 113,148,899 | T | G | 0.1522 | -0.0093 | 0.0015 | 1.87E-10 |
| rs7437726   | 4 | 114,980,228 | T | G | 0.1273 | 0.0104  | 0.0016 | 4.18E-11 |
| rs67432955  | 4 | 116,410,662 | A | G | 0.3946 | 0.0051  | 0.0011 | 1.58E-06 |
| rs7683392   | 4 | 118,280,149 | A | G | 0.3146 | -0.0061 | 0.0011 | 4.94E-08 |
| rs13143759  | 4 | 120,908,703 | A | G | 0.3523 | -0.0046 | 0.0011 | 2.83E-05 |
| rs6534322   | 4 | 122,695,318 | A | C | 0.0644 | -0.0104 | 0.0021 | 1.17E-06 |

|            |   |             |   |   |        |         |        |          |
|------------|---|-------------|---|---|--------|---------|--------|----------|
| rs6534338  | 4 | 123,026,869 | T | C | 0.3014 | 0.0105  | 0.0011 | 4.14E-20 |
| rs75925700 | 4 | 123,401,769 | A | G | 0.6667 | -0.0082 | 0.0013 | 1.54E-10 |
| rs6534591  | 4 | 127,825,185 | A | G | 0.3614 | -0.0061 | 0.0011 | 2.26E-08 |
| rs78540972 | 4 | 129,854,259 | A | C | 0.9172 | 0.0150  | 0.0019 | 3.03E-15 |
| rs71613929 | 4 | 130,292,532 | A | C | 0.0483 | -0.0137 | 0.0024 | 2.11E-08 |
| rs7694304  | 4 | 130,653,388 | C | G | 0.7365 | 0.0080  | 0.0012 | 1.33E-11 |
| rs9998726  | 4 | 131,315,417 | T | C | 0.4311 | -0.0063 | 0.0011 | 3.40E-09 |
| rs349841   | 4 | 132,787,818 | T | C | 0.6736 | 0.0050  | 0.0011 | 8.23E-06 |
| rs6814396  | 4 | 135,455,162 | A | C | 0.1972 | -0.0098 | 0.0013 | 1.23E-13 |
| rs72954160 | 4 | 136,107,038 | A | T | 0.9529 | -0.0114 | 0.0025 | 4.58E-06 |
| rs10014934 | 4 | 137,526,995 | T | C | 0.6251 | 0.0091  | 0.0011 | 3.09E-17 |
| rs28818309 | 4 | 138,025,243 | T | C | 0.7330 | 0.0053  | 0.0012 | 8.54E-06 |
| rs978890   | 4 | 138,743,944 | A | G | 0.8883 | 0.0061  | 0.0017 | 2.18E-04 |
| rs13141028 | 4 | 139,717,664 | C | G | 0.4449 | 0.0072  | 0.0011 | 8.14E-12 |
| rs6536382  | 4 | 140,621,478 | T | G | 0.4989 | -0.0051 | 0.0010 | 9.80E-07 |
| rs79170878 | 4 | 140,655,031 | A | G | 0.0306 | -0.0070 | 0.0030 | 2.21E-02 |
| rs11100308 | 4 | 140,769,923 | T | G | 0.6750 | -0.0109 | 0.0011 | 1.20E-22 |
| rs35319653 | 4 | 140,903,155 | T | C | 0.3396 | 0.0147  | 0.0011 | 2.16E-40 |
| rs35964658 | 4 | 142,679,588 | A | G | 0.9307 | -0.0117 | 0.0021 | 1.38E-08 |
| rs4690704  | 4 | 143,811,374 | T | C | 0.2291 | 0.0070  | 0.0012 | 2.14E-08 |
| rs4835355  | 4 | 147,837,787 | T | G | 0.6182 | -0.0105 | 0.0011 | 2.65E-22 |
| rs1437261  | 4 | 147,896,553 | A | G | 0.4871 | -0.0033 | 0.0011 | 3.59E-03 |
| rs9993133  | 4 | 149,016,541 | T | C | 0.8258 | 0.0076  | 0.0014 | 3.50E-08 |
| rs1490466  | 4 | 149,404,608 | A | C | 0.3330 | -0.0052 | 0.0011 | 2.76E-06 |
| rs535013   | 4 | 149,715,792 | A | C | 0.8212 | -0.0048 | 0.0014 | 4.57E-04 |
| rs983473   | 4 | 157,695,392 | T | C | 0.2307 | 0.0080  | 0.0012 | 1.09E-10 |
| rs56218836 | 4 | 158,378,542 | T | C | 0.8171 | -0.0076 | 0.0014 | 1.75E-08 |
| rs14633490 | 4 | 158,544,414 | A | G | 0.1525 | 0.0056  | 0.0015 | 1.14E-04 |
| rs56188374 | 4 | 158,860,186 | A | G | 0.0827 | -0.0141 | 0.0019 | 2.72E-13 |
| rs11737459 | 4 | 159,858,736 | A | T | 0.6958 | 0.0107  | 0.0011 | 3.94E-21 |
| rs77180386 | 4 | 159,886,831 | A | G | 0.7156 | 0.0085  | 0.0013 | 1.94E-10 |
| rs1893953  | 4 | 160,474,408 | T | G | 0.5260 | 0.0094  | 0.0010 | 4.51E-19 |
| rs4691601  | 4 | 160,599,341 | A | T | 0.4618 | -0.0110 | 0.0010 | 1.40E-25 |
| rs3210497  | 4 | 162,306,529 | A | T | 0.8998 | -0.0092 | 0.0017 | 1.34E-07 |
| rs78743226 | 4 | 162,432,522 | A | G | 0.8975 | 0.0090  | 0.0017 | 1.87E-07 |
| rs1841023  | 4 | 163,735,584 | A | C | 0.6892 | -0.0091 | 0.0011 | 7.96E-16 |
| rs7657483  | 4 | 164,232,102 | T | C | 0.7282 | 0.0111  | 0.0012 | 5.70E-21 |
| rs13137621 | 4 | 164,497,675 | A | G | 0.4270 | 0.0049  | 0.0011 | 3.42E-06 |
| rs12507497 | 4 | 164,895,662 | A | G | 0.6417 | -0.0086 | 0.0011 | 2.60E-15 |
| rs76857842 | 4 | 165,220,160 | T | C | 0.0108 | -0.0244 | 0.0051 | 2.03E-06 |
| rs71618440 | 4 | 166,067,021 | A | G | 0.1344 | 0.0100  | 0.0015 | 7.37E-11 |
| rs4627808  | 4 | 167,088,210 | T | C | 0.4695 | -0.0051 | 0.0011 | 9.67E-07 |
| rs1346377  | 4 | 167,896,080 | A | G | 0.0742 | -0.0117 | 0.0020 | 4.97E-09 |
| rs4449378  | 4 | 170,283,961 | T | C | 0.6128 | -0.0081 | 0.0011 | 5.75E-14 |
| rs6821231  | 4 | 170,959,988 | T | C | 0.2557 | -0.0119 | 0.0012 | 5.37E-23 |
| rs10026104 | 4 | 171,835,472 | A | G | 0.5889 | -0.0061 | 0.0011 | 8.33E-09 |
| rs7668960  | 4 | 172,448,875 | T | C | 0.1548 | 0.0159  | 0.0014 | 5.42E-28 |
| rs4602464  | 4 | 172,775,756 | A | C | 0.3359 | 0.0058  | 0.0011 | 1.88E-07 |

|             |   |             |   |   |        |         |        |          |
|-------------|---|-------------|---|---|--------|---------|--------|----------|
| rs4479668   | 4 | 173,077,497 | T | G | 0.4211 | 0.0080  | 0.0011 | 6.31E-14 |
| rs28890012  | 4 | 173,914,031 | A | G | 0.8207 | 0.0048  | 0.0014 | 3.92E-04 |
| rs7660231   | 4 | 174,017,709 | A | T | 0.7062 | 0.0083  | 0.0011 | 4.73E-13 |
| rs63303162  | 4 | 176,641,242 | A | G | 0.5593 | 0.0112  | 0.0011 | 1.89E-26 |
| rs6812406   | 4 | 176,730,310 | A | T | 0.5322 | 0.0088  | 0.0010 | 6.34E-17 |
| rs7677621   | 4 | 176,919,065 | T | C | 0.3531 | -0.0103 | 0.0011 | 5.54E-21 |
| rs4535283   | 4 | 177,237,325 | A | G | 0.4984 | -0.0056 | 0.0010 | 1.08E-07 |
| rs11937610  | 4 | 178,538,461 | A | G | 0.6519 | 0.0062  | 0.0011 | 1.46E-08 |
| rs11733298  | 4 | 178,728,644 | A | G | 0.4092 | -0.0056 | 0.0011 | 1.20E-07 |
| rs3106836   | 4 | 179,070,445 | A | G | 0.3861 | -0.0062 | 0.0011 | 6.94E-09 |
| rs2611040   | 4 | 180,446,850 | T | C | 0.3480 | 0.0057  | 0.0011 | 2.45E-07 |
| rs1344096   | 4 | 181,292,516 | A | C | 0.3539 | -0.0083 | 0.0011 | 4.72E-14 |
| rs6826215   | 4 | 181,965,015 | A | G | 0.7021 | -0.0050 | 0.0012 | 1.30E-05 |
| rs10434295  | 4 | 182,298,894 | A | G | 0.3834 | 0.0066  | 0.0011 | 8.60E-10 |
| rs1128956   | 4 | 183,724,005 | T | G | 0.8262 | -0.0102 | 0.0014 | 1.51E-13 |
| rs12644463  | 4 | 184,792,373 | T | C | 0.5887 | -0.0084 | 0.0011 | 3.10E-15 |
| rs11724690  | 4 | 186,764,747 | T | G | 0.2939 | 0.0095  | 0.0011 | 1.45E-16 |
| rs72717425  | 5 | 438,809     | T | C | 0.4079 | 0.0048  | 0.0011 | 7.72E-06 |
| rs17627501  | 5 | 2,912,375   | T | C | 0.4335 | -0.0057 | 0.0011 | 7.29E-08 |
| rs251828    | 5 | 3,185,711   | T | G | 0.5982 | 0.0059  | 0.0011 | 4.04E-08 |
| rs12516485  | 5 | 3,269,403   | A | G | 0.1251 | 0.0125  | 0.0016 | 3.42E-15 |
| rs56095367  | 5 | 3,429,914   | T | C | 0.6797 | -0.0113 | 0.0011 | 1.08E-23 |
| rs17635181  | 5 | 3,508,541   | A | C | 0.7217 | -0.0029 | 0.0012 | 1.43E-02 |
| rs521660    | 5 | 4,035,932   | T | C | 0.4940 | 0.0069  | 0.0010 | 4.28E-11 |
| rs12518468  | 5 | 7,249,696   | T | C | 0.6672 | 0.0084  | 0.0011 | 2.90E-14 |
| rs17207277  | 5 | 7,368,134   | A | T | 0.8120 | -0.0097 | 0.0013 | 5.56E-13 |
| rs57058832  | 5 | 10,105,560  | T | C | 0.8635 | 0.0074  | 0.0015 | 1.20E-06 |
| rs2962323   | 5 | 10,546,175  | A | C | 0.4273 | -0.0045 | 0.0011 | 2.98E-05 |
| rs32043     | 5 | 11,395,054  | C | G | 0.4453 | -0.0050 | 0.0011 | 1.76E-06 |
| rs26143     | 5 | 11,475,053  | T | C | 0.4658 | -0.0066 | 0.0010 | 2.39E-10 |
| rs7731344   | 5 | 11,584,449  | T | C | 0.2282 | -0.0043 | 0.0012 | 6.19E-04 |
| rs59962327  | 5 | 12,599,693  | T | C | 0.1153 | -0.0089 | 0.0016 | 6.94E-08 |
| rs4702958   | 5 | 13,576,124  | T | C | 0.6761 | -0.0073 | 0.0011 | 7.20E-11 |
| rs952062    | 5 | 13,739,867  | A | T | 0.1157 | 0.0102  | 0.0017 | 1.30E-09 |
| rs795540    | 5 | 13,817,984  | T | C | 0.5854 | -0.0080 | 0.0011 | 5.95E-14 |
| rs27455     | 5 | 16,452,451  | A | C | 0.2970 | -0.0055 | 0.0011 | 1.37E-06 |
| rs112578848 | 5 | 20,830,997  | A | G | 0.8664 | 0.0060  | 0.0016 | 9.78E-05 |
| rs6452080   | 5 | 22,325,948  | T | C | 0.4348 | 0.0080  | 0.0011 | 3.07E-14 |
| rs111449441 | 5 | 24,586,703  | T | C | 0.8644 | 0.0083  | 0.0015 | 5.37E-08 |
| rs10045751  | 5 | 25,036,336  | C | G | 0.6739 | -0.0068 | 0.0011 | 1.25E-09 |
| rs17563464  | 5 | 26,913,774  | A | C | 0.2189 | -0.0127 | 0.0013 | 2.35E-23 |
| rs6882059   | 5 | 27,776,291  | T | C | 0.6418 | -0.0055 | 0.0011 | 4.58E-07 |
| rs12187684  | 5 | 29,777,781  | A | C | 0.7140 | 0.0058  | 0.0012 | 6.26E-07 |
| rs13176265  | 5 | 30,082,238  | T | C | 0.1904 | 0.0062  | 0.0013 | 3.94E-06 |
| rs11739024  | 5 | 30,776,002  | T | C | 0.0189 | 0.0156  | 0.0038 | 5.01E-05 |
| rs10940919  | 5 | 30,802,867  | A | G | 0.5888 | -0.0114 | 0.0011 | 6.59E-27 |
| rs35733856  | 5 | 30,830,597  | A | G | 0.5961 | -0.0119 | 0.0011 | 8.26E-29 |
| rs13358689  | 5 | 32,437,658  | T | C | 0.8424 | 0.0085  | 0.0014 | 3.83E-09 |

|             |   |            |   |   |        |         |        |          |
|-------------|---|------------|---|---|--------|---------|--------|----------|
| rs4869579   | 5 | 38,231,257 | T | C | 0.5202 | 0.0063  | 0.0010 | 1.44E-09 |
| rs13158147  | 5 | 43,052,235 | T | C | 0.1138 | -0.0086 | 0.0016 | 1.64E-07 |
| rs13161494  | 5 | 43,366,191 | A | T | 0.4168 | 0.0073  | 0.0011 | 5.17E-12 |
| rs115666458 | 5 | 51,465,947 | A | G | 0.0509 | -0.0114 | 0.0024 | 1.70E-06 |
| rs13169187  | 5 | 51,716,957 | A | G | 0.5398 | -0.0070 | 0.0010 | 2.94E-11 |
| rs58962658  | 5 | 52,789,117 | T | C | 0.7822 | -0.0081 | 0.0013 | 1.56E-10 |
| rs72748122  | 5 | 52,799,426 | A | C | 0.8362 | 0.0118  | 0.0014 | 8.13E-17 |
| rs435713    | 5 | 52,903,804 | A | C | 0.2739 | 0.0023  | 0.0012 | 5.22E-02 |
| rs16883014  | 5 | 53,843,335 | T | C | 0.6996 | 0.0063  | 0.0011 | 3.98E-08 |
| rs10068286  | 5 | 54,047,337 | C | G | 0.3862 | -0.0045 | 0.0011 | 3.22E-05 |
| rs286004    | 5 | 55,706,081 | T | C | 0.4201 | 0.0067  | 0.0011 | 2.26E-10 |
| rs13157551  | 5 | 56,664,596 | A | G | 0.5406 | 0.0072  | 0.0011 | 9.70E-12 |
| rs1020661   | 5 | 57,179,504 | T | C | 0.3435 | 0.0090  | 0.0011 | 2.34E-16 |
| rs78433294  | 5 | 57,397,378 | T | C | 0.3039 | 0.0058  | 0.0011 | 4.03E-07 |
| rs6450476   | 5 | 57,771,087 | A | G | 0.2909 | -0.0111 | 0.0012 | 5.78E-22 |
| rs7723730   | 5 | 57,997,402 | A | G | 0.1955 | 0.0071  | 0.0013 | 6.12E-08 |
| rs11951879  | 5 | 58,836,781 | A | G | 0.9332 | -0.0137 | 0.0021 | 8.93E-11 |
| rs1960603   | 5 | 59,045,193 | C | G | 0.2546 | 0.0104  | 0.0012 | 3.36E-18 |
| rs966221    | 5 | 59,502,520 | A | G | 0.4083 | -0.0105 | 0.0011 | 8.59E-23 |
| rs6878055   | 5 | 59,660,803 | A | T | 0.2882 | -0.0147 | 0.0012 | 6.72E-37 |
| rs61160187  | 5 | 60,111,579 | A | G | 0.6118 | -0.0196 | 0.0011 | 1.32E-74 |
| rs75577466  | 5 | 60,605,507 | C | G | 0.1703 | -0.0204 | 0.0014 | 1.95E-48 |
| rs10061522  | 5 | 60,655,782 | A | G | 0.8717 | 0.0060  | 0.0016 | 1.40E-04 |
| rs2974454   | 5 | 61,030,954 | T | C | 0.4513 | -0.0066 | 0.0011 | 2.68E-10 |
| rs1812798   | 5 | 61,398,412 | A | C | 0.7414 | 0.0016  | 0.0012 | 1.82E-01 |
| rs153872    | 5 | 61,696,182 | T | C | 0.2550 | -0.0040 | 0.0012 | 8.53E-04 |
| rs2365396   | 5 | 62,879,766 | A | G | 0.3112 | -0.0121 | 0.0011 | 1.44E-26 |
| rs3943933   | 5 | 63,020,327 | A | T | 0.4884 | -0.0118 | 0.0010 | 1.58E-29 |
| rs2440999   | 5 | 63,724,143 | A | G | 0.1636 | 0.0110  | 0.0014 | 7.48E-15 |
| rs116540977 | 5 | 64,823,431 | T | C | 0.0345 | -0.0115 | 0.0030 | 1.05E-04 |
| rs13159274  | 5 | 65,983,727 | A | T | 0.0975 | 0.0147  | 0.0018 | 6.96E-17 |
| rs10065036  | 5 | 66,338,084 | A | G | 0.2364 | -0.0078 | 0.0012 | 3.19E-10 |
| rs17236381  | 5 | 66,800,946 | A | C | 0.1368 | 0.0085  | 0.0015 | 2.75E-08 |
| rs12153457  | 5 | 67,531,209 | T | C | 0.8157 | -0.0071 | 0.0014 | 1.49E-07 |
| rs9291928   | 5 | 67,608,679 | A | C | 0.7558 | 0.0072  | 0.0012 | 3.85E-09 |
| rs56194430  | 5 | 67,824,690 | T | C | 0.1669 | -0.0186 | 0.0014 | 5.72E-40 |
| rs35243     | 5 | 68,018,262 | A | G | 0.2591 | -0.0034 | 0.0012 | 4.28E-03 |
| rs1692379   | 5 | 71,335,278 | T | C | 0.8732 | 0.0050  | 0.0016 | 1.52E-03 |
| rs6879628   | 5 | 71,415,422 | A | C | 0.5023 | -0.0040 | 0.0010 | 1.22E-04 |
| rs7709268   | 5 | 71,565,984 | T | C | 0.1121 | 0.0065  | 0.0017 | 8.40E-05 |
| rs56026882  | 5 | 72,401,140 | A | G | 0.1656 | 0.0078  | 0.0014 | 2.75E-08 |
| rs10942677  | 5 | 72,892,600 | T | C | 0.7196 | 0.0028  | 0.0012 | 1.53E-02 |
| rs10066707  | 5 | 74,560,579 | A | G | 0.3761 | 0.0046  | 0.0011 | 2.16E-05 |
| rs150431497 | 5 | 76,591,451 | A | G | 0.9969 | 0.0420  | 0.0096 | 1.25E-05 |
| rs354332    | 5 | 77,124,569 | T | C | 0.4452 | -0.0051 | 0.0011 | 1.38E-06 |
| rs252761    | 5 | 77,380,723 | T | G | 0.5931 | 0.0021  | 0.0011 | 4.73E-02 |
| rs72776486  | 5 | 77,515,056 | A | C | 0.2241 | -0.0068 | 0.0013 | 4.92E-08 |
| rs60637254  | 5 | 79,323,473 | C | G | 0.3972 | -0.0084 | 0.0011 | 4.48E-15 |

|             |   |             |   |   |        |         |        |          |
|-------------|---|-------------|---|---|--------|---------|--------|----------|
| rs245362    | 5 | 80,141,214  | T | C | 0.5358 | 0.0064  | 0.0010 | 8.17E-10 |
| rs11744829  | 5 | 81,069,401  | C | G | 0.2965 | -0.0082 | 0.0011 | 8.57E-13 |
| rs12658240  | 5 | 81,173,265  | T | C | 0.2273 | 0.0088  | 0.0012 | 2.25E-12 |
| rs72778518  | 5 | 81,546,023  | A | G | 0.9224 | -0.0128 | 0.0020 | 6.57E-11 |
| rs12514970  | 5 | 82,810,102  | T | C | 0.1044 | 0.0090  | 0.0019 | 1.58E-06 |
| rs10073918  | 5 | 83,382,640  | T | G | 0.6435 | -0.0052 | 0.0011 | 2.32E-06 |
| rs7702338   | 5 | 85,525,907  | A | T | 0.4621 | -0.0066 | 0.0010 | 3.95E-10 |
| rs6893772   | 5 | 86,597,231  | A | G | 0.4082 | -0.0018 | 0.0011 | 8.46E-02 |
| rs147946601 | 5 | 87,391,024  | C | G | 0.9783 | -0.0105 | 0.0036 | 3.63E-03 |
| rs357515    | 5 | 87,502,325  | A | G | 0.7803 | 0.0039  | 0.0013 | 2.63E-03 |
| rs116552258 | 5 | 87,857,702  | T | C | 0.1226 | 0.0231  | 0.0016 | 2.86E-47 |
| rs17422060  | 5 | 87,858,930  | T | G | 0.6220 | 0.0154  | 0.0011 | 1.96E-46 |
| rs34316     | 5 | 88,015,545  | A | C | 0.4285 | 0.0163  | 0.0011 | 6.58E-53 |
| rs6864888   | 5 | 88,273,653  | T | G | 0.3790 | 0.0088  | 0.0011 | 4.84E-16 |
| rs2011074   | 5 | 88,741,059  | T | C | 0.3521 | 0.0083  | 0.0011 | 4.94E-14 |
| rs10045806  | 5 | 89,245,524  | T | G | 0.1507 | 0.0097  | 0.0015 | 5.22E-11 |
| rs72781028  | 5 | 89,605,859  | T | G | 0.1325 | -0.0060 | 0.0015 | 9.70E-05 |
| rs12186681  | 5 | 90,940,109  | T | C | 0.7910 | 0.0115  | 0.0013 | 3.17E-19 |
| rs17590025  | 5 | 91,138,453  | A | G | 0.7216 | 0.0106  | 0.0012 | 8.71E-20 |
| rs72777062  | 5 | 91,692,183  | T | C | 0.2182 | 0.0060  | 0.0013 | 2.45E-06 |
| rs10064877  | 5 | 91,968,603  | T | C | 0.1616 | 0.0078  | 0.0014 | 4.43E-08 |
| rs17669337  | 5 | 92,187,932  | T | C | 0.4117 | -0.0101 | 0.0011 | 2.46E-21 |
| rs40079     | 5 | 92,329,824  | A | T | 0.8204 | -0.0026 | 0.0014 | 5.32E-02 |
| rs12188716  | 5 | 92,784,778  | A | G | 0.9429 | 0.0075  | 0.0023 | 8.70E-04 |
| rs10064431  | 5 | 92,950,673  | T | C | 0.4921 | -0.0093 | 0.0011 | 7.25E-19 |
| rs17311988  | 5 | 92,994,868  | T | C | 0.0191 | -0.0275 | 0.0039 | 1.40E-12 |
| rs7702649   | 5 | 93,065,149  | A | C | 0.1886 | 0.0132  | 0.0013 | 5.02E-23 |
| rs12189060  | 5 | 93,992,652  | T | C | 0.4560 | 0.0068  | 0.0011 | 1.15E-10 |
| rs42417     | 5 | 94,198,290  | T | C | 0.6932 | -0.0039 | 0.0011 | 5.25E-04 |
| rs41276251  | 5 | 94,208,748  | A | G | 0.0528 | -0.0088 | 0.0023 | 1.70E-04 |
| rs13160231  | 5 | 96,153,790  | T | C | 0.2152 | -0.0066 | 0.0013 | 1.93E-07 |
| rs61077558  | 5 | 96,446,075  | C | G | 0.0371 | 0.0130  | 0.0028 | 2.94E-06 |
| rs468216    | 5 | 99,653,975  | C | G | 0.7420 | 0.0043  | 0.0012 | 3.24E-04 |
| rs187580    | 5 | 102,627,355 | T | G | 0.7694 | -0.0109 | 0.0012 | 2.10E-18 |
| rs74944275  | 5 | 102,726,073 | T | C | 0.0417 | 0.0190  | 0.0026 | 5.22E-13 |
| rs171697    | 5 | 103,956,516 | C | G | 0.6689 | 0.0152  | 0.0011 | 2.37E-42 |
| rs325513    | 5 | 104,097,984 | T | C | 0.7185 | -0.0098 | 0.0012 | 2.96E-17 |
| rs4337830   | 5 | 104,862,943 | A | G | 0.6384 | -0.0049 | 0.0011 | 6.79E-06 |
| rs13153013  | 5 | 105,081,582 | A | T | 0.1487 | 0.0041  | 0.0015 | 4.90E-03 |
| rs1121840   | 5 | 106,685,840 | T | C | 0.7754 | 0.0104  | 0.0013 | 1.30E-16 |
| rs252991    | 5 | 106,767,346 | A | G | 0.3750 | 0.0103  | 0.0011 | 2.33E-21 |
| rs60127859  | 5 | 106,951,860 | T | C | 0.9274 | -0.0070 | 0.0020 | 4.85E-04 |
| rs13163062  | 5 | 106,955,451 | T | C | 0.4260 | 0.0094  | 0.0011 | 7.03E-19 |
| rs79477964  | 5 | 107,131,806 | T | C | 0.2227 | -0.0024 | 0.0013 | 5.81E-02 |
| rs34410     | 5 | 107,469,684 | C | G | 0.4624 | -0.0076 | 0.0010 | 4.73E-13 |
| rs2284988   | 5 | 109,041,308 | C | G | 0.3283 | -0.0106 | 0.0011 | 2.00E-21 |
| rs1378509   | 5 | 109,433,891 | T | C | 0.7426 | -0.0045 | 0.0012 | 2.07E-04 |
| rs306067    | 5 | 110,710,360 | C | G | 0.8892 | -0.0082 | 0.0017 | 9.73E-07 |

|             |   |             |   |   |        |         |        |          |
|-------------|---|-------------|---|---|--------|---------|--------|----------|
| rs79248502  | 5 | 111,012,600 | C | G | 0.9440 | -0.0118 | 0.0023 | 1.96E-07 |
| rs10050950  | 5 | 111,260,051 | A | G | 0.3352 | -0.0073 | 0.0011 | 4.64E-11 |
| rs13170603  | 5 | 111,828,282 | T | C | 0.1661 | 0.0065  | 0.0014 | 4.35E-06 |
| rs4705758   | 5 | 112,391,033 | A | C | 0.4632 | -0.0053 | 0.0010 | 3.98E-07 |
| rs10063699  | 5 | 112,875,351 | A | C | 0.0192 | 0.0164  | 0.0038 | 1.78E-05 |
| rs34471251  | 5 | 112,970,062 | A | G | 0.1708 | 0.0061  | 0.0014 | 1.12E-05 |
| rs56306449  | 5 | 113,447,916 | A | G | 0.8030 | 0.0064  | 0.0013 | 1.21E-06 |
| rs406413    | 5 | 113,898,581 | A | T | 0.7867 | 0.0127  | 0.0013 | 2.55E-23 |
| rs77058418  | 5 | 114,458,310 | T | C | 0.5858 | 0.0043  | 0.0011 | 5.11E-05 |
| rs111694540 | 5 | 117,025,985 | T | C | 0.0563 | -0.0112 | 0.0023 | 7.85E-07 |
| rs4365869   | 5 | 117,254,988 | A | T | 0.6637 | 0.0084  | 0.0011 | 4.26E-14 |
| rs78803455  | 5 | 117,996,739 | A | G | 0.0362 | 0.0069  | 0.0028 | 1.39E-02 |
| rs2406164   | 5 | 120,099,178 | C | G | 0.3143 | -0.0118 | 0.0011 | 2.37E-25 |
| rs7721182   | 5 | 122,405,791 | T | C | 0.4433 | 0.0067  | 0.0011 | 1.70E-10 |
| rs1962848   | 5 | 122,671,660 | A | G | 0.2498 | 0.0029  | 0.0012 | 1.63E-02 |
| rs890928    | 5 | 122,696,367 | A | C | 0.6227 | -0.0039 | 0.0011 | 3.93E-04 |
| rs13156123  | 5 | 122,732,050 | T | G | 0.5706 | 0.0051  | 0.0011 | 1.30E-06 |
| rs147987632 | 5 | 122,750,388 | T | C | 0.0287 | -0.0164 | 0.0031 | 1.75E-07 |
| rs154286    | 5 | 123,158,443 | A | G | 0.9606 | 0.0078  | 0.0027 | 3.69E-03 |
| rs4835814   | 5 | 123,298,624 | T | G | 0.6852 | -0.0027 | 0.0011 | 1.48E-02 |
| rs160706    | 5 | 123,586,728 | A | G | 0.6268 | 0.0070  | 0.0011 | 1.17E-10 |
| rs6595530   | 5 | 123,863,028 | A | T | 0.4426 | 0.0061  | 0.0011 | 8.01E-09 |
| rs6895658   | 5 | 124,274,035 | T | C | 0.8050 | -0.0094 | 0.0013 | 1.15E-12 |
| rs13177659  | 5 | 124,336,747 | A | G | 0.4420 | -0.0079 | 0.0011 | 5.75E-14 |
| rs30178     | 5 | 132,202,399 | T | C | 0.2604 | -0.0055 | 0.0012 | 4.11E-06 |
| rs329120    | 5 | 133,861,756 | T | C | 0.4245 | 0.0133  | 0.0011 | 5.21E-36 |
| rs801545    | 5 | 134,994,816 | T | G | 0.2136 | -0.0097 | 0.0013 | 5.37E-14 |
| rs6860189   | 5 | 136,530,244 | C | G | 0.8493 | 0.0142  | 0.0015 | 2.54E-22 |
| rs17782938  | 5 | 136,638,318 | A | G | 0.8493 | -0.0095 | 0.0015 | 7.81E-11 |
| rs7710048   | 5 | 136,799,480 | T | C | 0.7658 | 0.0096  | 0.0012 | 7.18E-15 |
| rs11746390  | 5 | 137,085,233 | T | C | 0.7315 | -0.0086 | 0.0012 | 3.28E-13 |
| rs6869910   | 5 | 139,629,450 | T | C | 0.5501 | 0.0067  | 0.0011 | 1.97E-10 |
| rs10063055  | 5 | 140,990,108 | T | C | 0.2371 | -0.0125 | 0.0012 | 3.26E-24 |
| rs77275946  | 5 | 141,059,360 | T | G | 0.0201 | -0.0142 | 0.0038 | 1.50E-04 |
| rs17097461  | 5 | 141,077,992 | T | C | 0.9245 | 0.0195  | 0.0020 | 8.91E-23 |
| rs39991     | 5 | 141,123,287 | T | C | 0.7281 | 0.0077  | 0.0012 | 7.54E-11 |
| rs11739849  | 5 | 143,585,622 | T | C | 0.8632 | -0.0068 | 0.0015 | 7.71E-06 |
| rs34010978  | 5 | 144,509,298 | A | G | 0.0900 | 0.0108  | 0.0018 | 3.76E-09 |
| rs13161488  | 5 | 145,572,664 | T | C | 0.6480 | -0.0087 | 0.0011 | 2.45E-15 |
| rs12516990  | 5 | 145,927,688 | C | G | 0.2066 | -0.0089 | 0.0013 | 4.50E-12 |
| rs10075216  | 5 | 146,848,270 | A | T | 0.5019 | 0.0037  | 0.0010 | 4.60E-04 |
| rs79129596  | 5 | 147,902,938 | C | G | 0.0538 | 0.0127  | 0.0024 | 6.90E-08 |
| rs13174179  | 5 | 149,150,671 | A | G | 0.3218 | -0.0070 | 0.0011 | 4.00E-10 |
| rs6880251   | 5 | 149,652,000 | T | C | 0.2305 | -0.0094 | 0.0012 | 5.53E-14 |
| rs3797622   | 5 | 149,827,098 | A | G | 0.2621 | -0.0064 | 0.0012 | 6.55E-08 |
| rs2964252   | 5 | 152,067,929 | A | G | 0.3111 | 0.0102  | 0.0011 | 1.30E-19 |
| rs512983    | 5 | 152,895,409 | T | C | 0.2087 | -0.0077 | 0.0013 | 1.84E-09 |
| rs1461224   | 5 | 153,186,237 | T | G | 0.5229 | 0.0057  | 0.0010 | 4.38E-08 |

|             |   |             |   |   |        |         |        |          |
|-------------|---|-------------|---|---|--------|---------|--------|----------|
| rs6580068   | 5 | 153,673,621 | T | C | 0.2188 | -0.0093 | 0.0013 | 1.96E-13 |
| rs9784665   | 5 | 154,829,200 | T | C | 0.1901 | 0.0046  | 0.0014 | 1.11E-03 |
| rs32338     | 5 | 155,555,690 | A | G | 0.4485 | -0.0060 | 0.0011 | 1.48E-08 |
| rs6881817   | 5 | 157,887,966 | T | C | 0.2588 | 0.0060  | 0.0012 | 6.14E-07 |
| rs2546365   | 5 | 159,598,450 | A | C | 0.2459 | 0.0052  | 0.0012 | 2.09E-05 |
| rs187212246 | 5 | 160,723,242 | T | C | 0.9965 | -0.0310 | 0.0091 | 6.16E-04 |
| rs17463127  | 5 | 160,952,502 | A | T | 0.7348 | -0.0083 | 0.0012 | 3.20E-12 |
| rs4552666   | 5 | 161,180,720 | A | G | 0.7679 | -0.0080 | 0.0012 | 1.26E-10 |
| rs116679069 | 5 | 161,219,417 | T | C | 0.0130 | -0.0125 | 0.0046 | 7.20E-03 |
| rs158839    | 5 | 163,071,831 | A | C | 0.6120 | -0.0062 | 0.0011 | 6.42E-09 |
| rs544460344 | 5 | 163,272,289 | T | C | 0.0056 | 0.0244  | 0.0074 | 9.82E-04 |
| rs1363072   | 5 | 163,472,839 | T | C | 0.4769 | -0.0033 | 0.0010 | 1.66E-03 |
| rs11951831  | 5 | 164,441,438 | A | G | 0.8778 | 0.0096  | 0.0016 | 2.04E-09 |
| rs55973983  | 5 | 164,917,399 | T | G | 0.1801 | -0.0052 | 0.0014 | 1.30E-04 |
| rs28807772  | 5 | 165,249,121 | A | G | 0.7798 | 0.0061  | 0.0013 | 1.55E-06 |
| rs1096225   | 5 | 165,397,947 | T | C | 0.3847 | 0.0054  | 0.0011 | 5.26E-07 |
| rs42210     | 5 | 166,408,788 | C | G | 0.7123 | -0.0118 | 0.0012 | 3.13E-24 |
| rs4868791   | 5 | 166,758,289 | A | G | 0.6297 | 0.0056  | 0.0011 | 2.86E-07 |
| rs10078588  | 5 | 166,816,176 | A | T | 0.5184 | -0.0054 | 0.0010 | 2.65E-07 |
| rs10039736  | 5 | 167,426,711 | C | G | 0.6635 | 0.0079  | 0.0011 | 1.25E-12 |
| rs12659719  | 5 | 167,621,049 | T | C | 0.5697 | 0.0085  | 0.0011 | 9.75E-16 |
| rs2003850   | 5 | 167,844,095 | T | C | 0.3212 | 0.0075  | 0.0011 | 2.59E-11 |
| rs112716884 | 5 | 168,036,387 | A | G | 0.8194 | -0.0073 | 0.0014 | 9.04E-08 |
| rs72837981  | 5 | 168,691,860 | A | T | 0.1639 | 0.0083  | 0.0014 | 4.33E-09 |
| rs7702888   | 5 | 169,032,328 | T | C | 0.6282 | 0.0066  | 0.0011 | 9.81E-10 |
| rs451998    | 5 | 169,233,115 | C | G | 0.3634 | -0.0061 | 0.0011 | 1.82E-08 |
| rs12513693  | 5 | 169,283,703 | T | C | 0.9041 | -0.0129 | 0.0018 | 3.26E-13 |
| rs4867608   | 5 | 169,936,414 | A | T | 0.6950 | 0.0078  | 0.0011 | 9.02E-12 |
| rs2441019   | 5 | 170,468,415 | A | T | 0.6870 | -0.0102 | 0.0011 | 1.35E-19 |
| rs7715167   | 5 | 170,778,824 | T | C | 0.3883 | -0.0082 | 0.0011 | 2.02E-14 |
| rs77813823  | 5 | 172,114,135 | A | G | 0.0558 | -0.0112 | 0.0023 | 8.54E-07 |
| rs59539756  | 5 | 173,524,092 | T | C | 0.9149 | 0.0100  | 0.0019 | 9.72E-08 |
| rs57788948  | 5 | 174,600,507 | T | C | 0.7874 | -0.0066 | 0.0013 | 3.11E-07 |
| rs265981    | 5 | 174,870,902 | A | G | 0.3796 | 0.0072  | 0.0011 | 2.14E-11 |
| rs11134999  | 5 | 176,163,794 | T | C | 0.3081 | 0.0086  | 0.0011 | 5.85E-14 |
| rs251848    | 5 | 176,492,557 | A | G | 0.4927 | -0.0088 | 0.0010 | 4.09E-17 |
| rs2630767   | 5 | 176,870,700 | T | C | 0.4413 | 0.0130  | 0.0011 | 6.56E-35 |
| rs57272473  | 5 | 178,381,722 | T | C | 0.4024 | -0.0068 | 0.0011 | 2.12E-10 |
| rs4701051   | 5 | 178,548,136 | T | C | 0.6645 | -0.0039 | 0.0011 | 4.22E-04 |
| rs33900     | 5 | 178,765,138 | T | C | 0.4162 | 0.0050  | 0.0011 | 2.37E-06 |
| rs62406991  | 5 | 179,658,323 | A | G | 0.7422 | -0.0071 | 0.0012 | 2.72E-09 |
| rs1328688   | 6 | 3,468,508   | A | G | 0.4473 | 0.0084  | 0.0011 | 9.92E-16 |
| rs9504062   | 6 | 4,362,178   | T | G | 0.3704 | -0.0046 | 0.0011 | 2.31E-05 |
| rs575975    | 6 | 6,555,474   | A | G | 0.4191 | 0.0063  | 0.0011 | 2.89E-09 |
| rs9470808   | 6 | 12,035,486  | A | G | 0.1212 | -0.0120 | 0.0016 | 1.09E-13 |
| rs868483    | 6 | 12,747,857  | A | C | 0.4229 | 0.0055  | 0.0011 | 2.29E-07 |
| rs9381401   | 6 | 12,801,967  | A | C | 0.5749 | -0.0069 | 0.0011 | 7.41E-11 |
| rs11757278  | 6 | 13,180,454  | T | C | 0.6931 | -0.0082 | 0.0011 | 5.03E-13 |

|             |   |            |   |   |        |         |        |          |
|-------------|---|------------|---|---|--------|---------|--------|----------|
| rs3817741   | 6 | 13,279,507 | A | G | 0.1867 | -0.0108 | 0.0013 | 1.01E-15 |
| rs1935309   | 6 | 14,612,872 | T | G | 0.8964 | 0.0127  | 0.0017 | 1.39E-13 |
| rs1267488   | 6 | 14,719,994 | A | G | 0.8202 | -0.0149 | 0.0014 | 5.97E-28 |
| rs422247    | 6 | 14,913,987 | T | C | 0.7430 | 0.0075  | 0.0012 | 3.56E-10 |
| rs179942    | 6 | 16,398,917 | T | C | 0.4019 | -0.0065 | 0.0011 | 1.55E-09 |
| rs115077346 | 6 | 16,533,896 | A | G | 0.9894 | 0.0252  | 0.0052 | 1.02E-06 |
| rs9297016   | 6 | 16,663,101 | A | G | 0.3986 | 0.0112  | 0.0011 | 9.13E-26 |
| rs2025124   | 6 | 16,962,604 | T | C | 0.2422 | 0.0016  | 0.0012 | 1.94E-01 |
| rs72829857  | 6 | 16,966,052 | A | G | 0.7527 | -0.0170 | 0.0012 | 7.31E-45 |
| rs13210795  | 6 | 17,108,786 | A | G | 0.1936 | 0.0078  | 0.0013 | 4.12E-09 |
| rs72826409  | 6 | 18,886,882 | T | C | 0.7094 | 0.0043  | 0.0012 | 1.90E-04 |
| rs975303    | 6 | 19,028,788 | A | G | 0.8265 | -0.0148 | 0.0014 | 1.17E-26 |
| rs16881997  | 6 | 19,293,431 | T | C | 0.9929 | 0.0266  | 0.0063 | 2.59E-05 |
| rs9465509   | 6 | 19,744,129 | A | G | 0.4815 | -0.0079 | 0.0010 | 4.55E-14 |
| rs34909536  | 6 | 23,059,949 | T | C | 0.2239 | 0.0057  | 0.0013 | 5.79E-06 |
| rs9393415   | 6 | 23,447,436 | T | C | 0.6909 | 0.0138  | 0.0011 | 2.60E-34 |
| rs9366651   | 6 | 26,336,696 | T | G | 0.5347 | 0.0122  | 0.0010 | 3.89E-31 |
| rs55964643  | 6 | 26,340,872 | A | G | 0.5084 | -0.0067 | 0.0011 | 2.12E-10 |
| rs9467804   | 6 | 26,583,129 | T | C | 0.4764 | -0.0107 | 0.0010 | 2.36E-24 |
| rs74759001  | 6 | 27,600,285 | A | G | 0.0292 | 0.0242  | 0.0037 | 3.69E-11 |
| rs9380007   | 6 | 27,660,508 | T | C | 0.6308 | 0.0083  | 0.0011 | 1.36E-14 |
| rs6930903   | 6 | 28,981,244 | A | G | 0.7493 | 0.0159  | 0.0013 | 4.73E-33 |
| rs1362104   | 6 | 30,101,656 | A | G | 0.3876 | 0.0099  | 0.0011 | 9.46E-20 |
| rs534316532 | 6 | 30,243,235 | T | C | 0.4521 | -0.0035 | 0.0012 | 4.12E-03 |
| rs58226684  | 6 | 30,285,943 | T | C | 0.9537 | -0.0046 | 0.0025 | 6.98E-02 |
| rs1110464   | 6 | 30,296,071 | T | C | 0.5829 | 0.0054  | 0.0011 | 7.13E-07 |
| rs55777621  | 6 | 30,584,133 | A | G | 0.0352 | -0.0113 | 0.0029 | 8.84E-05 |
| rs9267576   | 6 | 31,812,038 | T | G | 0.1366 | 0.0182  | 0.0015 | 1.00E-32 |
| rs9267673   | 6 | 31,883,679 | T | C | 0.0902 | -0.0209 | 0.0018 | 2.73E-30 |
| rs28497975  | 6 | 32,526,197 | A | C | 0.0195 | 0.0156  | 0.0051 | 2.26E-03 |
| rs2076312   | 6 | 33,142,162 | A | C | 0.1646 | -0.0097 | 0.0014 | 6.98E-12 |
| rs1061801   | 6 | 33,282,338 | A | G | 0.1897 | -0.0098 | 0.0013 | 1.84E-13 |
| rs79926713  | 6 | 33,395,522 | T | G | 0.1713 | -0.0073 | 0.0014 | 1.60E-07 |
| rs542056    | 6 | 33,577,084 | T | G | 0.9914 | 0.0241  | 0.0057 | 2.77E-05 |
| rs7774407   | 6 | 33,775,391 | T | C | 0.6600 | 0.0050  | 0.0011 | 5.89E-06 |
| rs9368787   | 6 | 33,906,104 | A | C | 0.5095 | 0.0057  | 0.0010 | 4.54E-08 |
| rs2451381   | 6 | 34,003,336 | A | T | 0.2170 | -0.0091 | 0.0013 | 1.35E-12 |
| rs144702502 | 6 | 34,096,435 | A | G | 0.0122 | 0.0226  | 0.0048 | 2.52E-06 |
| rs9462027   | 6 | 34,797,241 | A | G | 0.2798 | -0.0104 | 0.0012 | 5.43E-19 |
| rs34140181  | 6 | 35,118,056 | T | C | 0.6821 | 0.0090  | 0.0013 | 5.07E-12 |
| rs129546    | 6 | 36,688,729 | T | C | 0.3728 | -0.0050 | 0.0011 | 3.77E-06 |
| rs57349798  | 6 | 37,486,052 | A | G | 0.4117 | 0.0095  | 0.0011 | 4.32E-19 |
| rs2504846   | 6 | 40,373,846 | T | C | 0.0262 | -0.0258 | 0.0033 | 3.74E-15 |
| rs28385630  | 6 | 40,400,877 | A | G | 0.0794 | 0.0118  | 0.0019 | 1.06E-09 |
| rs9471365   | 6 | 40,503,394 | T | C | 0.5282 | 0.0043  | 0.0010 | 4.63E-05 |
| rs9381037   | 6 | 41,073,638 | A | G | 0.1926 | 0.0064  | 0.0013 | 1.59E-06 |
| rs912883    | 6 | 41,552,040 | T | C | 0.6780 | 0.0088  | 0.0011 | 4.51E-15 |
| rs10947996  | 6 | 41,892,809 | T | G | 0.2532 | -0.0084 | 0.0012 | 3.82E-12 |



|             |   |             |   |   |        |         |        |          |
|-------------|---|-------------|---|---|--------|---------|--------|----------|
| rs113902057 | 6 | 43,432,565  | A | G | 0.0564 | 0.0112  | 0.0023 | 8.70E-07 |
| rs9367303   | 6 | 47,746,922  | A | G | 0.5261 | -0.0055 | 0.0010 | 1.73E-07 |
| rs2142743   | 6 | 48,851,886  | T | C | 0.4595 | 0.0063  | 0.0010 | 1.64E-09 |
| rs112255786 | 6 | 50,888,500  | C | G | 0.9385 | -0.0170 | 0.0022 | 6.51E-15 |
| rs9395725   | 6 | 51,671,616  | T | G | 0.2704 | 0.0064  | 0.0012 | 4.69E-08 |
| rs35401683  | 6 | 52,218,805  | A | G | 0.8218 | -0.0080 | 0.0014 | 6.32E-09 |
| rs6911986   | 6 | 52,857,694  | T | C | 0.2682 | -0.0083 | 0.0012 | 2.46E-12 |
| rs2653344   | 6 | 55,133,586  | T | C | 0.2016 | -0.0086 | 0.0013 | 4.78E-11 |
| rs67346355  | 6 | 63,565,598  | A | T | 0.7834 | 0.0069  | 0.0013 | 5.73E-08 |
| rs6415028   | 6 | 65,158,194  | C | G | 0.7051 | 0.0074  | 0.0011 | 1.14E-10 |
| rs9363382   | 6 | 66,219,840  | A | C | 0.2193 | 0.0098  | 0.0013 | 8.82E-15 |
| rs9342577   | 6 | 67,456,770  | A | G | 0.3462 | 0.0065  | 0.0011 | 3.11E-09 |
| rs9363753   | 6 | 68,125,255  | T | C | 0.1866 | 0.0089  | 0.0013 | 2.86E-11 |
| rs9454469   | 6 | 69,028,967  | A | G | 0.3209 | -0.0056 | 0.0011 | 4.80E-07 |
| rs13198040  | 6 | 69,255,589  | T | C | 0.0971 | 0.0081  | 0.0018 | 4.93E-06 |
| rs2248272   | 6 | 69,324,746  | A | G | 0.3887 | 0.0059  | 0.0011 | 5.21E-08 |
| rs112592247 | 6 | 71,074,703  | T | C | 0.0127 | 0.0369  | 0.0047 | 4.38E-15 |
| rs1741826   | 6 | 71,622,486  | T | C | 0.2901 | 0.0054  | 0.0012 | 3.08E-06 |
| rs9446446   | 6 | 72,408,163  | A | G | 0.5054 | -0.0058 | 0.0010 | 2.57E-08 |
| rs502506    | 6 | 72,724,390  | A | G | 0.4944 | -0.0067 | 0.0010 | 1.65E-10 |
| rs28767928  | 6 | 73,223,259  | A | T | 0.2854 | 0.0072  | 0.0012 | 5.47E-10 |
| rs4708009   | 6 | 73,697,108  | C | G | 0.8354 | 0.0069  | 0.0014 | 1.05E-06 |
| rs13212041  | 6 | 78,171,124  | T | C | 0.7995 | 0.0112  | 0.0013 | 9.06E-18 |
| rs10943588  | 6 | 79,510,994  | A | C | 0.6174 | 0.0068  | 0.0011 | 3.34E-10 |
| rs9343881   | 6 | 79,891,767  | A | G | 0.2180 | -0.0045 | 0.0013 | 3.49E-04 |
| rs6938711   | 6 | 82,976,115  | T | G | 0.6380 | 0.0055  | 0.0011 | 4.19E-07 |
| rs28381472  | 6 | 88,305,125  | T | C | 0.9200 | 0.0196  | 0.0019 | 3.05E-24 |
| rs9359760   | 6 | 88,593,579  | T | C | 0.1803 | -0.0047 | 0.0014 | 5.31E-04 |
| rs55719561  | 6 | 88,691,091  | A | G | 0.8867 | 0.0091  | 0.0017 | 3.31E-08 |
| rs1980986   | 6 | 89,762,007  | T | G | 0.5613 | -0.0059 | 0.0011 | 1.74E-08 |
| rs990483    | 6 | 90,807,017  | C | G | 0.7275 | 0.0056  | 0.0012 | 2.34E-06 |
| rs9359939   | 6 | 92,133,241  | A | C | 0.2421 | -0.0108 | 0.0012 | 6.65E-19 |
| rs1338263   | 6 | 93,640,548  | A | G | 0.5467 | -0.0080 | 0.0011 | 2.62E-14 |
| rs560701    | 6 | 93,841,742  | A | G | 0.7005 | 0.0092  | 0.0011 | 1.58E-15 |
| rs7775100   | 6 | 96,519,657  | T | C | 0.3913 | -0.0081 | 0.0011 | 3.09E-14 |
| rs34815026  | 6 | 97,385,640  | T | C | 0.6637 | -0.0083 | 0.0011 | 5.37E-14 |
| rs1206133   | 6 | 97,543,137  | T | C | 0.7524 | 0.0076  | 0.0012 | 3.80E-10 |
| rs12526814  | 6 | 98,212,163  | T | C | 0.4306 | -0.0114 | 0.0011 | 3.81E-27 |
| rs1933721   | 6 | 98,313,223  | C | G | 0.5423 | -0.0268 | 0.0021 | 1.67E-37 |
| rs9372734   | 6 | 98,577,689  | T | C | 0.4819 | 0.0219  | 0.0010 | 3.15E-97 |
| rs9492353   | 6 | 99,237,468  | A | T | 0.5293 | -0.0054 | 0.0010 | 2.16E-07 |
| rs7759571   | 6 | 99,433,084  | T | C | 0.5572 | -0.0016 | 0.0011 | 1.22E-01 |
| rs9321394   | 6 | 99,600,083  | A | G | 0.2485 | 0.0092  | 0.0012 | 3.22E-14 |
| rs62432512  | 6 | 100,114,982 | T | C | 0.2509 | 0.0070  | 0.0012 | 8.51E-09 |
| rs9376528   | 6 | 100,334,409 | A | C | 0.3211 | 0.0072  | 0.0011 | 1.34E-10 |
| rs4839779   | 6 | 100,832,728 | A | G | 0.3546 | 0.0058  | 0.0011 | 1.16E-07 |
| rs13214394  | 6 | 102,883,639 | A | T | 0.7532 | -0.0067 | 0.0012 | 2.81E-08 |
| rs67435421  | 6 | 105,079,348 | A | C | 0.1263 | 0.0088  | 0.0016 | 2.21E-08 |

|             |   |             |   |   |        |         |        |          |
|-------------|---|-------------|---|---|--------|---------|--------|----------|
| rs7775540   | 6 | 108,039,290 | T | C | 0.6536 | 0.0091  | 0.0011 | 9.85E-17 |
| rs1283559   | 6 | 108,733,258 | T | G | 0.4376 | 0.0060  | 0.0011 | 1.49E-08 |
| rs9784763   | 6 | 109,624,937 | A | G | 0.3839 | 0.0068  | 0.0011 | 2.97E-10 |
| rs6905041   | 6 | 110,936,144 | T | C | 0.2009 | -0.0112 | 0.0013 | 7.50E-18 |
| rs7774177   | 6 | 111,579,045 | A | G | 0.4476 | -0.0060 | 0.0011 | 1.14E-08 |
| rs17072841  | 6 | 112,034,271 | A | G | 0.0468 | -0.0155 | 0.0025 | 4.12E-10 |
| rs115288136 | 6 | 112,992,912 | A | G | 0.7368 | -0.0075 | 0.0014 | 4.89E-08 |
| rs1031800   | 6 | 114,150,024 | A | C | 0.7579 | 0.0091  | 0.0012 | 9.07E-14 |
| rs117005904 | 6 | 114,218,608 | T | C | 0.1190 | 0.0156  | 0.0016 | 5.63E-22 |
| rs10080647  | 6 | 114,742,335 | A | C | 0.1427 | 0.0090  | 0.0015 | 1.92E-09 |
| rs365114    | 6 | 115,327,645 | T | C | 0.8125 | 0.0087  | 0.0013 | 1.08E-10 |
| rs4946087   | 6 | 115,821,030 | T | C | 0.3461 | -0.0075 | 0.0011 | 1.24E-11 |
| rs210651    | 6 | 117,854,605 | T | C | 0.4337 | 0.0060  | 0.0011 | 1.74E-08 |
| rs36142021  | 6 | 119,159,482 | T | C | 0.3024 | -0.0121 | 0.0011 | 3.27E-26 |
| rs13213409  | 6 | 123,321,410 | A | G | 0.6986 | -0.0072 | 0.0011 | 2.11E-10 |
| rs139612798 | 6 | 124,349,945 | T | C | 0.9666 | -0.0161 | 0.0030 | 5.12E-08 |
| rs577616874 | 6 | 124,760,516 | A | T | 0.0628 | 0.0145  | 0.0025 | 5.72E-09 |
| rs9320991   | 6 | 124,763,785 | T | C | 0.1974 | 0.0094  | 0.0013 | 1.11E-12 |
| rs1479046   | 6 | 124,963,241 | T | G | 0.1827 | 0.0070  | 0.0014 | 2.68E-07 |
| rs9388490   | 6 | 126,704,795 | T | C | 0.4488 | 0.0115  | 0.0011 | 8.43E-28 |
| rs4897189   | 6 | 127,088,550 | A | T | 0.7622 | -0.0005 | 0.0012 | 7.04E-01 |
| rs17205908  | 6 | 127,764,305 | T | C | 0.3265 | -0.0077 | 0.0012 | 2.59E-10 |
| rs12055782  | 6 | 128,312,033 | A | G | 0.7179 | -0.0118 | 0.0012 | 4.15E-24 |
| rs11757516  | 6 | 129,374,072 | C | G | 0.2775 | 0.0081  | 0.0012 | 5.04E-12 |
| rs17812330  | 6 | 140,335,268 | T | G | 0.2604 | -0.0081 | 0.0012 | 8.85E-12 |
| rs1869274   | 6 | 141,524,903 | A | C | 0.2554 | 0.0067  | 0.0012 | 1.97E-08 |
| rs6570521   | 6 | 142,964,625 | A | G | 0.6818 | 0.0085  | 0.0011 | 3.77E-14 |
| rs9373363   | 6 | 143,150,043 | A | G | 0.7552 | -0.0106 | 0.0012 | 2.66E-18 |
| rs2432871   | 6 | 143,733,908 | A | T | 0.2900 | -0.0064 | 0.0012 | 2.78E-08 |
| rs6929638   | 6 | 144,965,158 | A | G | 0.5298 | 0.0093  | 0.0010 | 6.21E-19 |
| rs6570660   | 6 | 145,230,852 | T | C | 0.2688 | -0.0117 | 0.0012 | 2.73E-23 |
| rs79556505  | 6 | 145,634,441 | T | C | 0.8995 | -0.0131 | 0.0017 | 5.39E-14 |
| rs474210    | 6 | 148,244,701 | A | C | 0.4802 | -0.0063 | 0.0010 | 2.14E-09 |
| rs851993    | 6 | 152,006,011 | A | G | 0.6114 | -0.0072 | 0.0011 | 1.60E-11 |
| rs13204918  | 6 | 152,202,929 | A | C | 0.9447 | 0.0104  | 0.0023 | 6.06E-06 |
| rs7356921   | 6 | 152,223,003 | T | C | 0.2410 | -0.0148 | 0.0012 | 9.09E-34 |
| rs35060990  | 6 | 152,339,163 | C | G | 0.9241 | -0.0138 | 0.0020 | 3.68E-12 |
| rs1062577   | 6 | 152,423,905 | A | T | 0.0700 | 0.0103  | 0.0021 | 5.66E-07 |
| rs12201105  | 6 | 152,812,569 | A | G | 0.8626 | -0.0102 | 0.0015 | 1.77E-11 |
| rs2295230   | 6 | 153,365,100 | A | C | 0.7037 | 0.0140  | 0.0012 | 5.63E-34 |
| rs4869852   | 6 | 155,622,481 | T | C | 0.6625 | -0.0082 | 0.0011 | 1.52E-13 |
| rs4869856   | 6 | 155,813,894 | A | G | 0.7266 | -0.0075 | 0.0012 | 2.08E-10 |
| rs59903549  | 6 | 156,448,341 | T | C | 0.0752 | -0.0150 | 0.0020 | 3.90E-14 |
| rs1889438   | 6 | 157,105,541 | A | G | 0.2804 | -0.0081 | 0.0012 | 3.25E-12 |
| rs80322007  | 6 | 157,771,378 | T | C | 0.7688 | -0.0075 | 0.0013 | 3.55E-09 |
| rs61748681  | 6 | 158,322,995 | A | G | 0.0119 | -0.0257 | 0.0049 | 1.35E-07 |
| rs827951    | 6 | 158,855,387 | A | G | 0.7310 | -0.0099 | 0.0012 | 4.78E-17 |
| rs11752345  | 6 | 160,148,348 | T | C | 0.2150 | 0.0089  | 0.0013 | 4.33E-12 |

|             |   |             |   |   |        |         |        |          |
|-------------|---|-------------|---|---|--------|---------|--------|----------|
| rs9457793   | 6 | 160,388,772 | T | G | 0.2065 | -0.0081 | 0.0013 | 4.20E-10 |
| rs76727996  | 6 | 162,438,723 | T | C | 0.0735 | 0.0133  | 0.0020 | 3.12E-11 |
| rs9356034   | 6 | 162,946,186 | T | C | 0.6834 | 0.0103  | 0.0011 | 4.67E-20 |
| rs558017    | 6 | 163,550,269 | A | C | 0.7597 | 0.0069  | 0.0012 | 2.19E-08 |
| rs6908317   | 6 | 163,796,849 | A | G | 0.7671 | 0.0076  | 0.0012 | 6.94E-10 |
| rs9459465   | 6 | 166,048,868 | A | G | 0.2324 | -0.0079 | 0.0012 | 1.67E-10 |
| rs4709995   | 6 | 166,313,447 | T | C | 0.3957 | -0.0074 | 0.0011 | 6.11E-12 |
| rs9356513   | 6 | 167,124,744 | A | C | 0.7076 | -0.0085 | 0.0012 | 2.84E-12 |
| rs34719425  | 6 | 167,620,407 | T | C | 0.2430 | 0.0095  | 0.0012 | 8.07E-15 |
| rs7762296   | 6 | 170,042,465 | T | C | 0.3050 | -0.0084 | 0.0011 | 2.02E-13 |
| rs11758937  | 6 | 170,687,475 | A | G | 0.2028 | -0.0052 | 0.0013 | 6.05E-05 |
| rs7793929   | 7 | 855,076     | A | T | 0.6562 | -0.0103 | 0.0013 | 5.76E-16 |
| rs7783487   | 7 | 860,160     | A | C | 0.6624 | -0.0100 | 0.0011 | 1.42E-19 |
| rs78395187  | 7 | 1,757,126   | A | G | 0.1423 | 0.0077  | 0.0015 | 3.04E-07 |
| rs2031047   | 7 | 1,792,201   | A | G | 0.3267 | -0.0104 | 0.0011 | 2.03E-20 |
| rs62442924  | 7 | 1,989,976   | T | C | 0.2113 | 0.0168  | 0.0013 | 2.20E-39 |
| rs113889661 | 7 | 2,137,611   | T | C | 0.0236 | 0.0252  | 0.0035 | 4.56E-13 |
| rs7788620   | 7 | 2,196,349   | A | G | 0.7807 | 0.0167  | 0.0013 | 8.27E-40 |
| rs3735099   | 7 | 2,472,429   | A | C | 0.0442 | 0.0172  | 0.0028 | 6.36E-10 |
| rs4588749   | 7 | 3,363,992   | A | G | 0.4464 | 0.0126  | 0.0011 | 7.59E-33 |
| rs17133535  | 7 | 3,583,890   | C | G | 0.7685 | -0.0090 | 0.0012 | 4.50E-13 |
| rs13244634  | 7 | 5,273,464   | T | C | 0.2363 | -0.0078 | 0.0012 | 2.10E-10 |
| rs6963810   | 7 | 5,329,448   | A | G | 0.3170 | -0.0066 | 0.0011 | 6.10E-09 |
| rs73057725  | 7 | 5,434,107   | A | G | 0.0346 | 0.0151  | 0.0029 | 2.31E-07 |
| rs3757479   | 7 | 5,761,191   | C | G | 0.4860 | 0.0086  | 0.0010 | 2.74E-16 |
| rs34639723  | 7 | 6,593,836   | T | C | 0.5388 | -0.0062 | 0.0011 | 3.02E-09 |
| rs2018586   | 7 | 7,361,896   | A | G | 0.1909 | 0.0084  | 0.0013 | 3.46E-10 |
| rs17568389  | 7 | 8,091,876   | A | T | 0.5108 | 0.0122  | 0.0010 | 3.47E-31 |
| rs34036351  | 7 | 8,145,218   | T | C | 0.4088 | -0.0049 | 0.0011 | 3.59E-06 |
| rs10447689  | 7 | 8,449,662   | T | G | 0.0977 | -0.0105 | 0.0018 | 2.39E-09 |
| rs4401754   | 7 | 8,557,562   | A | T | 0.6938 | -0.0064 | 0.0011 | 1.57E-08 |
| rs28817935  | 7 | 9,793,435   | A | G | 0.0764 | 0.0104  | 0.0020 | 1.31E-07 |
| rs118134876 | 7 | 11,500,372  | T | C | 0.0611 | -0.0311 | 0.0022 | 6.97E-46 |
| rs1526527   | 7 | 11,709,374  | T | C | 0.3781 | 0.0075  | 0.0011 | 4.77E-12 |
| rs5018924   | 7 | 11,835,850  | A | T | 0.5787 | 0.0051  | 0.0011 | 1.23E-06 |
| rs113779084 | 7 | 11,871,787  | A | G | 0.2980 | 0.0120  | 0.0011 | 1.40E-25 |
| rs2568617   | 7 | 13,455,926  | A | G | 0.2166 | -0.0072 | 0.0013 | 1.37E-08 |
| rs2692473   | 7 | 13,568,346  | A | C | 0.5057 | -0.0067 | 0.0010 | 1.56E-10 |
| rs6946355   | 7 | 13,992,460  | A | G | 0.4620 | 0.0069  | 0.0010 | 4.59E-11 |
| rs7791622   | 7 | 14,501,763  | T | C | 0.3803 | -0.0081 | 0.0011 | 4.41E-14 |
| rs58500374  | 7 | 14,876,808  | A | G | 0.8652 | -0.0104 | 0.0015 | 1.28E-11 |
| rs117248752 | 7 | 14,995,866  | A | C | 0.9576 | 0.0108  | 0.0026 | 3.41E-05 |
| rs12537600  | 7 | 18,182,771  | T | C | 0.7936 | 0.0098  | 0.0013 | 3.63E-14 |
| rs12700239  | 7 | 20,865,979  | A | C | 0.2034 | -0.0070 | 0.0013 | 7.11E-08 |
| rs116973    | 7 | 20,903,542  | T | C | 0.5356 | -0.0068 | 0.0010 | 1.00E-10 |
| rs7795600   | 7 | 21,084,329  | T | G | 0.4208 | 0.0070  | 0.0011 | 3.51E-11 |
| rs62439690  | 7 | 21,417,556  | A | G | 0.2610 | -0.0119 | 0.0012 | 2.04E-23 |
| rs13239084  | 7 | 21,684,131  | A | T | 0.5041 | -0.0074 | 0.0010 | 1.78E-12 |

|             |   |            |   |   |        |         |        |          |
|-------------|---|------------|---|---|--------|---------|--------|----------|
| rs10257510  | 7 | 21,759,745 | T | C | 0.4346 | 0.0067  | 0.0011 | 2.29E-10 |
| rs79265434  | 7 | 24,621,381 | A | G | 0.8866 | -0.0114 | 0.0017 | 5.94E-12 |
| rs11971710  | 7 | 29,809,569 | T | G | 0.6315 | -0.0072 | 0.0011 | 2.49E-11 |
| rs10242462  | 7 | 30,850,212 | C | G | 0.6089 | 0.0046  | 0.0011 | 1.58E-05 |
| rs10240905  | 7 | 32,263,069 | T | C | 0.3661 | -0.0108 | 0.0011 | 3.05E-23 |
| rs958217    | 7 | 32,493,417 | A | G | 0.6735 | 0.0077  | 0.0011 | 4.62E-12 |
| rs10279655  | 7 | 32,817,931 | A | T | 0.5449 | -0.0008 | 0.0011 | 4.68E-01 |
| rs143747834 | 7 | 34,675,652 | C | G | 0.2053 | -0.0078 | 0.0013 | 1.57E-09 |
| rs11979944  | 7 | 34,915,775 | T | C | 0.7706 | 0.0060  | 0.0012 | 1.72E-06 |
| rs2141277   | 7 | 39,099,178 | A | G | 0.4789 | 0.0098  | 0.0010 | 5.44E-21 |
| rs10268735  | 7 | 39,376,022 | A | G | 0.6646 | -0.0061 | 0.0011 | 3.57E-08 |
| rs886765    | 7 | 40,683,852 | T | C | 0.0824 | -0.0108 | 0.0019 | 1.73E-08 |
| rs12155345  | 7 | 41,301,734 | A | C | 0.6689 | 0.0077  | 0.0011 | 4.29E-12 |
| rs2108167   | 7 | 41,718,107 | T | G | 0.2532 | 0.0071  | 0.0012 | 2.92E-09 |
| rs4720409   | 7 | 41,884,913 | A | G | 0.6572 | -0.0059 | 0.0011 | 1.13E-07 |
| rs4724085   | 7 | 42,015,480 | A | C | 0.6856 | -0.0087 | 0.0011 | 8.84E-15 |
| rs12702051  | 7 | 43,599,488 | T | C | 0.3180 | -0.0049 | 0.0011 | 1.32E-05 |
| rs799443    | 7 | 44,769,013 | A | T | 0.6654 | -0.0109 | 0.0011 | 9.30E-23 |
| rs1050331   | 7 | 44,808,091 | T | G | 0.5293 | 0.0099  | 0.0010 | 5.52E-21 |
| rs13250     | 7 | 45,026,180 | A | G | 0.2093 | -0.0064 | 0.0013 | 7.35E-07 |
| rs71543921  | 7 | 46,554,551 | T | C | 0.0424 | -0.0097 | 0.0026 | 2.13E-04 |
| rs66488846  | 7 | 48,783,897 | A | T | 0.4418 | 0.0071  | 0.0011 | 1.55E-11 |
| rs11767338  | 7 | 49,861,369 | T | G | 0.7434 | 0.0116  | 0.0012 | 5.48E-22 |
| rs117380979 | 7 | 53,888,862 | C | G | 0.0036 | -0.0403 | 0.0089 | 6.11E-06 |
| rs11772108  | 7 | 54,711,985 | A | T | 0.7214 | -0.0082 | 0.0012 | 2.44E-12 |
| rs149352678 | 7 | 54,920,906 | T | C | 0.0979 | 0.0101  | 0.0018 | 1.09E-08 |
| rs62465232  | 7 | 66,909,661 | A | G | 0.6785 | -0.0049 | 0.0011 | 1.29E-05 |
| rs13227218  | 7 | 67,085,784 | C | G | 0.7207 | 0.0055  | 0.0012 | 2.62E-06 |
| rs79471185  | 7 | 68,764,166 | T | G | 0.0622 | -0.0076 | 0.0022 | 4.79E-04 |
| rs41852     | 7 | 69,012,139 | T | G | 0.3367 | -0.0067 | 0.0011 | 1.80E-09 |
| rs7803932   | 7 | 70,203,673 | A | G | 0.1630 | 0.0117  | 0.0014 | 1.55E-16 |
| rs929342    | 7 | 70,838,143 | A | G | 0.2959 | -0.0063 | 0.0011 | 5.17E-08 |
| rs12699100  | 7 | 71,307,658 | T | C | 0.7059 | -0.0072 | 0.0011 | 3.09E-10 |
| rs757895    | 7 | 71,513,888 | T | C | 0.6944 | 0.0105  | 0.0011 | 2.71E-20 |
| rs12699131  | 7 | 71,751,316 | A | G | 0.4729 | 0.0138  | 0.0010 | 1.05E-39 |
| rs576189327 | 7 | 73,536,730 | A | C | 0.0042 | -0.0389 | 0.0086 | 5.52E-06 |
| rs1167796   | 7 | 75,173,180 | A | G | 0.4253 | 0.0120  | 0.0011 | 7.13E-30 |
| rs1179607   | 7 | 75,245,141 | T | C | 0.5351 | -0.0017 | 0.0011 | 1.12E-01 |
| rs6956241   | 7 | 75,900,223 | T | G | 0.1403 | 0.0134  | 0.0015 | 5.88E-19 |
| rs6952637   | 7 | 76,002,759 | A | G | 0.4153 | 0.0042  | 0.0011 | 8.18E-05 |
| rs372877109 | 7 | 77,109,929 | T | C | 0.0077 | -0.0108 | 0.0063 | 8.76E-02 |
| rs41281019  | 7 | 77,427,588 | A | C | 0.0139 | 0.0071  | 0.0045 | 1.14E-01 |
| rs7796089   | 7 | 77,512,098 | C | G | 0.3381 | -0.0083 | 0.0011 | 7.59E-14 |
| rs2428940   | 7 | 77,564,448 | A | C | 0.2632 | -0.0045 | 0.0013 | 3.21E-04 |
| rs62462737  | 7 | 77,594,019 | A | G | 0.8652 | 0.0066  | 0.0015 | 1.74E-05 |
| rs11975489  | 7 | 77,976,904 | A | G | 0.6992 | -0.0046 | 0.0011 | 4.94E-05 |
| rs35114939  | 7 | 78,128,099 | A | G | 0.4860 | 0.0078  | 0.0010 | 8.62E-14 |
| rs141053930 | 7 | 78,148,458 | A | C | 0.8841 | 0.0100  | 0.0019 | 1.11E-07 |

|            |   |             |   |   |        |         |        |          |
|------------|---|-------------|---|---|--------|---------|--------|----------|
| rs2714661  | 7 | 79,441,376  | A | G | 0.6664 | -0.0078 | 0.0011 | 2.19E-12 |
| rs4489243  | 7 | 79,828,958  | C | G | 0.9129 | 0.0064  | 0.0019 | 5.17E-04 |
| rs304785   | 7 | 80,018,297  | A | T | 0.7654 | -0.0051 | 0.0012 | 3.62E-05 |
| rs73709354 | 7 | 80,511,421  | C | G | 0.9448 | 0.0118  | 0.0023 | 2.78E-07 |
| rs6973867  | 7 | 82,706,009  | T | G | 0.3073 | 0.0055  | 0.0011 | 1.14E-06 |
| rs41454    | 7 | 85,798,820  | A | G | 0.7606 | -0.0105 | 0.0012 | 8.79E-18 |
| rs62488405 | 7 | 86,234,000  | A | C | 0.3564 | -0.0101 | 0.0011 | 1.94E-20 |
| rs2214631  | 7 | 88,507,921  | A | T | 0.2788 | 0.0071  | 0.0012 | 1.43E-09 |
| rs7777286  | 7 | 88,830,993  | C | G | 0.7065 | 0.0065  | 0.0011 | 1.26E-08 |
| rs56735584 | 7 | 89,150,344  | A | C | 0.1314 | 0.0039  | 0.0015 | 1.23E-02 |
| rs2373921  | 7 | 89,367,971  | C | G | 0.5323 | 0.0046  | 0.0010 | 1.30E-05 |
| rs10487992 | 7 | 90,559,340  | T | G | 0.7959 | 0.0069  | 0.0013 | 1.13E-07 |
| rs43001    | 7 | 90,753,293  | C | G | 0.8157 | -0.0072 | 0.0014 | 1.06E-07 |
| rs10259526 | 7 | 91,576,824  | T | G | 0.6117 | -0.0089 | 0.0011 | 1.34E-16 |
| rs1123915  | 7 | 92,665,884  | A | T | 0.9048 | -0.0043 | 0.0018 | 1.73E-02 |
| rs6960056  | 7 | 92,673,154  | A | G | 0.4397 | 0.0129  | 0.0011 | 3.50E-34 |
| rs4729132  | 7 | 94,028,924  | A | G | 0.6323 | -0.0046 | 0.0011 | 2.01E-05 |
| rs737902   | 7 | 95,138,755  | A | G | 0.2745 | -0.0086 | 0.0012 | 2.83E-13 |
| rs7798509  | 7 | 95,772,293  | T | C | 0.3860 | -0.0053 | 0.0011 | 7.72E-07 |
| rs11766968 | 7 | 96,622,615  | T | C | 0.1433 | -0.0097 | 0.0015 | 9.55E-11 |
| rs6465603  | 7 | 97,289,046  | A | G | 0.1809 | 0.0110  | 0.0014 | 4.55E-16 |
| rs6956283  | 7 | 98,756,597  | T | C | 0.7329 | 0.0112  | 0.0012 | 2.70E-21 |
| rs77356530 | 7 | 99,019,565  | A | G | 0.0167 | 0.0158  | 0.0041 | 1.22E-04 |
| rs12531809 | 7 | 99,620,473  | T | G | 0.3748 | -0.0069 | 0.0011 | 1.45E-10 |
| rs2406253  | 7 | 100,077,273 | A | G | 0.8024 | 0.0152  | 0.0013 | 8.26E-31 |
| rs75741381 | 7 | 100,809,458 | C | G | 0.8427 | -0.0069 | 0.0014 | 1.60E-06 |
| rs12533258 | 7 | 101,561,056 | T | C | 0.1731 | -0.0077 | 0.0014 | 2.26E-08 |
| rs413348   | 7 | 101,692,987 | A | G | 0.7717 | 0.0109  | 0.0012 | 3.59E-18 |
| rs73185898 | 7 | 101,727,633 | C | G | 0.8155 | 0.0109  | 0.0015 | 1.14E-13 |
| rs2023482  | 7 | 101,929,278 | T | C | 0.6413 | -0.0079 | 0.0011 | 4.73E-13 |
| rs76624694 | 7 | 103,269,402 | T | C | 0.9645 | 0.0114  | 0.0028 | 5.79E-05 |
| rs73714120 | 7 | 104,421,249 | A | G | 0.2995 | 0.0100  | 0.0011 | 2.56E-18 |
| rs56016333 | 7 | 104,596,248 | T | C | 0.6488 | -0.0138 | 0.0011 | 4.38E-36 |
| rs73186008 | 7 | 104,826,263 | A | T | 0.1757 | 0.0165  | 0.0014 | 2.71E-32 |
| rs4730097  | 7 | 105,276,155 | T | C | 0.4640 | 0.0058  | 0.0010 | 2.53E-08 |
| rs76678496 | 7 | 107,054,958 | T | C | 0.0569 | -0.0110 | 0.0023 | 1.16E-06 |
| rs10953566 | 7 | 107,998,949 | A | T | 0.4112 | -0.0045 | 0.0011 | 2.44E-05 |
| rs10249803 | 7 | 109,974,056 | T | C | 0.6967 | 0.0059  | 0.0011 | 2.00E-07 |
| rs211800   | 7 | 110,076,140 | A | G | 0.5163 | 0.0025  | 0.0010 | 1.74E-02 |
| rs2523035  | 7 | 112,020,351 | A | T | 0.1401 | -0.0117 | 0.0015 | 6.71E-15 |
| rs2396625  | 7 | 113,028,634 | A | T | 0.4275 | 0.0068  | 0.0011 | 1.49E-10 |
| rs62490485 | 7 | 113,179,978 | T | G | 0.6009 | 0.0055  | 0.0011 | 2.49E-07 |
| rs2100249  | 7 | 113,848,497 | T | G | 0.3520 | -0.0083 | 0.0011 | 2.77E-14 |
| rs6466499  | 7 | 114,493,274 | A | G | 0.2006 | -0.0113 | 0.0013 | 7.66E-18 |
| rs6958592  | 7 | 114,702,840 | T | C | 0.4590 | 0.0070  | 0.0011 | 2.19E-11 |
| rs2402019  | 7 | 115,598,764 | T | G | 0.8887 | 0.0093  | 0.0017 | 2.96E-08 |
| rs41741    | 7 | 116,438,511 | T | G | 0.6694 | 0.0074  | 0.0011 | 3.35E-11 |
| rs989996   | 7 | 117,642,252 | T | C | 0.4608 | -0.0094 | 0.0010 | 2.98E-19 |

|             |   |             |   |   |        |         |        |          |
|-------------|---|-------------|---|---|--------|---------|--------|----------|
| rs11767283  | 7 | 121,947,456 | A | G | 0.7731 | 0.0099  | 0.0013 | 3.89E-15 |
| rs6466819   | 7 | 122,097,058 | A | G | 0.3678 | -0.0103 | 0.0011 | 2.49E-21 |
| rs2430048   | 7 | 122,294,181 | C | G | 0.8424 | 0.0076  | 0.0014 | 1.03E-07 |
| rs1343904   | 7 | 122,807,611 | T | C | 0.3968 | 0.0071  | 0.0011 | 2.80E-11 |
| rs1419561   | 7 | 125,574,140 | A | T | 0.4654 | 0.0045  | 0.0010 | 2.16E-05 |
| rs10228052  | 7 | 126,084,920 | T | C | 0.4555 | 0.0066  | 0.0011 | 3.55E-10 |
| rs1361975   | 7 | 126,560,441 | A | C | 0.6478 | 0.0094  | 0.0011 | 6.73E-18 |
| rs806180    | 7 | 127,283,699 | T | C | 0.3826 | -0.0091 | 0.0011 | 2.89E-17 |
| rs117070316 | 7 | 127,668,769 | T | G | 0.0320 | 0.0351  | 0.0034 | 1.39E-24 |
| rs79436018  | 7 | 127,694,032 | T | C | 0.8824 | 0.0133  | 0.0016 | 3.42E-16 |
| rs1043595   | 7 | 128,410,012 | A | G | 0.2735 | 0.0166  | 0.0012 | 2.36E-45 |
| rs1596974   | 7 | 130,501,219 | T | C | 0.1614 | 0.0068  | 0.0014 | 2.27E-06 |
| rs7784962   | 7 | 132,020,387 | T | C | 0.4086 | 0.0062  | 0.0011 | 5.81E-09 |
| rs10230652  | 7 | 132,697,829 | T | C | 0.3114 | 0.0093  | 0.0011 | 1.41E-16 |
| rs28588750  | 7 | 133,629,138 | A | G | 0.6402 | 0.0115  | 0.0011 | 7.58E-26 |
| rs4728354   | 7 | 135,051,979 | T | C | 0.5508 | 0.0099  | 0.0011 | 7.14E-21 |
| rs4283969   | 7 | 137,071,327 | T | G | 0.6436 | 0.0111  | 0.0011 | 2.44E-24 |
| rs2718136   | 7 | 138,622,572 | T | C | 0.6717 | 0.0046  | 0.0011 | 3.08E-05 |
| rs10241819  | 7 | 139,753,080 | T | C | 0.6002 | -0.0072 | 0.0011 | 2.14E-11 |
| rs79507672  | 7 | 139,993,248 | A | C | 0.2493 | 0.0060  | 0.0012 | 7.23E-07 |
| rs1949860   | 7 | 145,799,127 | A | C | 0.8555 | 0.0074  | 0.0015 | 7.48E-07 |
| rs2538963   | 7 | 147,599,446 | T | C | 0.3502 | -0.0056 | 0.0011 | 3.29E-07 |
| rs2021871   | 7 | 150,071,156 | T | C | 0.6738 | 0.0065  | 0.0011 | 4.87E-09 |
| rs2303929   | 7 | 150,761,314 | A | G | 0.2329 | 0.0093  | 0.0012 | 5.68E-14 |
| rs10256396  | 7 | 151,124,989 | A | C | 0.3382 | 0.0065  | 0.0011 | 3.34E-09 |
| rs4726070   | 7 | 151,328,218 | A | G | 0.5979 | 0.0102  | 0.0011 | 1.05E-21 |
| rs11505217  | 7 | 155,560,120 | A | C | 0.8389 | 0.0095  | 0.0014 | 2.59E-11 |
| rs117245091 | 7 | 155,934,258 | A | G | 0.0153 | 0.0198  | 0.0043 | 3.88E-06 |
| rs62490979  | 7 | 156,328,318 | C | G | 0.6914 | -0.0060 | 0.0011 | 1.03E-07 |
| rs6949246   | 7 | 157,247,703 | T | C | 0.5545 | 0.0057  | 0.0011 | 7.13E-08 |
| rs336421    | 8 | 570,648     | T | C | 0.3733 | 0.0079  | 0.0011 | 2.91E-13 |
| rs7009856   | 8 | 1,146,075   | C | G | 0.3887 | 0.0067  | 0.0011 | 4.12E-10 |
| rs1499693   | 8 | 3,289,450   | T | C | 0.2589 | -0.0062 | 0.0012 | 2.39E-07 |
| rs11783952  | 8 | 4,161,932   | A | T | 0.2741 | 0.0063  | 0.0012 | 9.69E-08 |
| rs73660848  | 8 | 4,306,213   | A | G | 0.8395 | -0.0079 | 0.0014 | 3.54E-08 |
| rs4517143   | 8 | 4,835,344   | A | G | 0.6732 | 0.0110  | 0.0011 | 6.69E-23 |
| rs79754409  | 8 | 5,903,561   | A | T | 0.8039 | 0.0077  | 0.0013 | 4.25E-09 |
| rs12676597  | 8 | 9,332,605   | T | C | 0.3652 | 0.0107  | 0.0011 | 1.05E-22 |
| rs11249939  | 8 | 9,556,500   | A | G | 0.6183 | 0.0075  | 0.0011 | 2.54E-12 |
| rs1521195   | 8 | 9,842,234   | A | G | 0.7998 | -0.0059 | 0.0013 | 6.20E-06 |
| rs12679687  | 8 | 10,123,027  | T | C | 0.1502 | -0.0133 | 0.0015 | 1.30E-19 |
| rs7814757   | 8 | 10,675,188  | T | C | 0.4013 | -0.0073 | 0.0011 | 8.58E-12 |
| rs1692821   | 8 | 11,699,988  | T | C | 0.2883 | -0.0041 | 0.0012 | 3.61E-04 |
| rs13272943  | 8 | 12,629,112  | C | G | 0.8237 | 0.0042  | 0.0014 | 2.40E-03 |
| rs11773992  | 8 | 12,667,804  | C | G | 0.1783 | -0.0138 | 0.0014 | 5.84E-24 |
| rs17276956  | 8 | 13,979,875  | A | C | 0.5213 | -0.0080 | 0.0010 | 3.23E-14 |
| rs7014300   | 8 | 14,795,876  | A | C | 0.1935 | 0.0092  | 0.0013 | 3.11E-12 |
| rs10111226  | 8 | 15,245,178  | A | G | 0.6257 | -0.0091 | 0.0011 | 4.73E-17 |

|             |   |            |   |   |        |         |        |          |
|-------------|---|------------|---|---|--------|---------|--------|----------|
| rs2517063   | 8 | 17,013,640 | A | C | 0.5438 | 0.0071  | 0.0011 | 1.76E-11 |
| rs147173823 | 8 | 18,222,807 | A | G | 0.9951 | 0.0363  | 0.0076 | 1.79E-06 |
| rs1492287   | 8 | 18,684,622 | T | C | 0.3172 | -0.0058 | 0.0011 | 2.61E-07 |
| rs7818300   | 8 | 18,970,010 | A | T | 0.4602 | 0.0053  | 0.0011 | 4.70E-07 |
| rs11783263  | 8 | 19,371,674 | C | G | 0.6471 | 0.0073  | 0.0011 | 3.33E-11 |
| rs4464983   | 8 | 19,680,979 | T | C | 0.6282 | -0.0059 | 0.0011 | 5.51E-08 |
| rs73211337  | 8 | 20,894,971 | A | T | 0.6072 | -0.0064 | 0.0011 | 2.32E-09 |
| rs12542005  | 8 | 21,410,594 | T | G | 0.4870 | 0.0067  | 0.0010 | 1.21E-10 |
| rs7818819   | 8 | 21,888,853 | A | G | 0.6737 | -0.0059 | 0.0011 | 1.20E-07 |
| rs7005505   | 8 | 22,276,393 | T | C | 0.6459 | -0.0052 | 0.0011 | 1.82E-06 |
| rs35201266  | 8 | 22,549,697 | T | C | 0.2870 | 0.0079  | 0.0012 | 1.40E-11 |
| rs2430813   | 8 | 22,863,247 | T | C | 0.7693 | 0.0110  | 0.0012 | 8.62E-19 |
| rs5017327   | 8 | 24,597,912 | A | G | 0.6429 | -0.0066 | 0.0011 | 1.70E-09 |
| rs73219806  | 8 | 26,279,173 | A | C | 0.1664 | 0.0124  | 0.0014 | 1.34E-18 |
| rs1372879   | 8 | 26,368,212 | T | C | 0.4259 | 0.0095  | 0.0011 | 2.53E-19 |
| rs2565059   | 8 | 27,336,978 | A | G | 0.1998 | 0.0089  | 0.0013 | 9.33E-12 |
| rs3735724   | 8 | 28,695,361 | T | C | 0.1566 | 0.0090  | 0.0014 | 3.72E-10 |
| rs12234936  | 8 | 30,857,668 | T | C | 0.4190 | -0.0146 | 0.0011 | 6.54E-43 |
| rs2725385   | 8 | 30,928,146 | T | C | 0.2910 | -0.0128 | 0.0012 | 1.51E-28 |
| rs4376462   | 8 | 31,359,814 | T | G | 0.3977 | -0.0083 | 0.0011 | 5.84E-15 |
| rs1495211   | 8 | 33,969,491 | A | G | 0.2142 | -0.0074 | 0.0013 | 6.03E-09 |
| rs7002561   | 8 | 34,882,308 | T | G | 0.0877 | 0.0105  | 0.0019 | 1.28E-08 |
| rs2951812   | 8 | 35,954,918 | C | G | 0.5113 | -0.0058 | 0.0010 | 4.19E-08 |
| rs1079678   | 8 | 36,664,834 | A | G | 0.2115 | 0.0055  | 0.0013 | 1.74E-05 |
| rs2980813   | 8 | 40,050,010 | A | T | 0.4696 | 0.0077  | 0.0010 | 1.97E-13 |
| rs17561583  | 8 | 40,673,248 | T | C | 0.1368 | -0.0097 | 0.0015 | 2.03E-10 |
| rs3824277   | 8 | 41,347,396 | A | G | 0.0464 | -0.0148 | 0.0025 | 3.06E-09 |
| rs2974337   | 8 | 42,390,873 | T | C | 0.4942 | 0.0118  | 0.0010 | 2.42E-29 |
| rs4873387   | 8 | 48,464,457 | T | C | 0.0480 | 0.0139  | 0.0024 | 1.36E-08 |
| rs16917562  | 8 | 53,162,201 | A | T | 0.8844 | -0.0135 | 0.0016 | 2.11E-16 |
| rs1866823   | 8 | 57,436,577 | A | G | 0.5413 | 0.0106  | 0.0011 | 8.10E-24 |
| rs4737537   | 8 | 60,096,451 | T | C | 0.2049 | -0.0078 | 0.0013 | 1.99E-09 |
| rs4270952   | 8 | 60,794,591 | T | C | 0.3702 | 0.0065  | 0.0011 | 1.48E-08 |
| rs75791531  | 8 | 64,262,939 | A | C | 0.0477 | 0.0106  | 0.0025 | 1.96E-05 |
| rs4739090   | 8 | 64,321,053 | T | C | 0.3509 | 0.0070  | 0.0011 | 2.21E-10 |
| rs62509552  | 8 | 64,818,620 | A | G | 0.7211 | -0.0081 | 0.0012 | 3.33E-12 |
| rs28862984  | 8 | 66,043,532 | T | C | 0.1841 | -0.0049 | 0.0014 | 3.82E-04 |
| rs6472213   | 8 | 66,508,336 | T | C | 0.3304 | -0.0074 | 0.0011 | 2.30E-11 |
| rs10156241  | 8 | 68,863,901 | A | C | 0.4081 | 0.0041  | 0.0011 | 1.00E-04 |
| rs10099657  | 8 | 69,202,702 | A | G | 0.6540 | -0.0081 | 0.0011 | 1.50E-13 |
| rs28594971  | 8 | 70,468,380 | A | G | 0.1790 | 0.0087  | 0.0014 | 1.88E-10 |
| rs6472530   | 8 | 71,371,142 | A | T | 0.6508 | -0.0073 | 0.0011 | 3.09E-11 |
| rs11992983  | 8 | 73,884,908 | A | G | 0.5463 | -0.0084 | 0.0011 | 9.88E-16 |
| rs17224289  | 8 | 74,703,133 | T | C | 0.1197 | -0.0132 | 0.0016 | 3.10E-16 |
| rs11993350  | 8 | 75,012,201 | T | G | 0.0534 | -0.0121 | 0.0023 | 2.23E-07 |
| rs144014951 | 8 | 75,060,103 | T | G | 0.9719 | -0.0162 | 0.0032 | 3.40E-07 |
| rs2596125   | 8 | 76,642,325 | T | C | 0.4163 | 0.0064  | 0.0011 | 2.07E-09 |
| rs2312427   | 8 | 77,366,529 | A | G | 0.1916 | -0.0025 | 0.0013 | 6.55E-02 |

|             |   |             |   |   |        |         |        |          |
|-------------|---|-------------|---|---|--------|---------|--------|----------|
| rs7812747   | 8 | 77,366,932  | A | G | 0.5697 | -0.0085 | 0.0011 | 7.64E-16 |
| rs2733711   | 8 | 77,769,819  | T | C | 0.2795 | 0.0066  | 0.0012 | 1.30E-08 |
| rs2461063   | 8 | 80,619,113  | T | C | 0.3345 | -0.0043 | 0.0011 | 1.02E-04 |
| rs62515110  | 8 | 81,560,138  | T | C | 0.8110 | 0.0093  | 0.0013 | 5.64E-12 |
| rs1357913   | 8 | 83,674,246  | A | G | 0.5839 | 0.0071  | 0.0011 | 2.33E-11 |
| rs1357780   | 8 | 85,934,993  | A | C | 0.2936 | -0.0074 | 0.0012 | 1.85E-10 |
| rs4484676   | 8 | 87,271,776  | T | C | 0.4391 | -0.0095 | 0.0011 | 3.03E-19 |
| rs28451864  | 8 | 87,679,777  | A | T | 0.5502 | 0.0118  | 0.0011 | 2.63E-29 |
| rs1524835   | 8 | 88,044,906  | T | C | 0.6524 | -0.0048 | 0.0011 | 1.28E-05 |
| rs402565    | 8 | 88,477,927  | T | C | 0.4208 | 0.0059  | 0.0011 | 3.41E-08 |
| rs2189260   | 8 | 91,228,812  | T | C | 0.6726 | 0.0078  | 0.0011 | 3.16E-12 |
| rs10216873  | 8 | 91,420,589  | A | G | 0.9619 | 0.0095  | 0.0027 | 5.17E-04 |
| rs2740795   | 8 | 91,927,455  | A | T | 0.7379 | 0.0092  | 0.0012 | 1.04E-14 |
| rs7845971   | 8 | 93,022,095  | A | T | 0.2226 | -0.0108 | 0.0013 | 9.57E-18 |
| rs12155540  | 8 | 93,206,092  | T | C | 0.3295 | 0.0117  | 0.0011 | 6.83E-26 |
| rs62519947  | 8 | 93,450,407  | T | C | 0.3276 | 0.0087  | 0.0011 | 6.52E-15 |
| rs56168441  | 8 | 93,753,986  | A | T | 0.8180 | 0.0091  | 0.0014 | 1.77E-11 |
| rs1055797   | 8 | 95,523,233  | T | G | 0.2485 | 0.0105  | 0.0013 | 2.56E-15 |
| rs10111287  | 8 | 95,578,426  | T | C | 0.2985 | 0.0099  | 0.0011 | 3.63E-18 |
| rs10808352  | 8 | 97,760,946  | C | G | 0.6709 | -0.0070 | 0.0011 | 2.52E-10 |
| rs11996826  | 8 | 99,159,594  | A | G | 0.6879 | 0.0052  | 0.0011 | 3.69E-06 |
| rs1786313   | 8 | 101,737,075 | T | C | 0.3137 | 0.0077  | 0.0011 | 8.15E-12 |
| rs2454007   | 8 | 104,137,518 | A | G | 0.7426 | 0.0047  | 0.0012 | 9.95E-05 |
| rs11786807  | 8 | 105,077,013 | A | G | 0.5729 | -0.0081 | 0.0011 | 1.72E-14 |
| rs3857891   | 8 | 105,703,852 | A | G | 0.2114 | 0.0072  | 0.0013 | 2.05E-08 |
| rs12541093  | 8 | 106,463,774 | T | C | 0.2094 | -0.0102 | 0.0013 | 2.34E-15 |
| rs1564117   | 8 | 107,619,553 | C | G | 0.8534 | 0.0125  | 0.0015 | 2.46E-17 |
| rs1480560   | 8 | 109,572,851 | A | G | 0.3973 | 0.0057  | 0.0011 | 1.19E-07 |
| rs74833567  | 8 | 110,201,408 | A | G | 0.0976 | 0.0128  | 0.0018 | 4.08E-13 |
| rs1605127   | 8 | 110,859,323 | A | G | 0.1985 | 0.0060  | 0.0013 | 4.80E-06 |
| rs6994168   | 8 | 111,505,925 | C | G | 0.7765 | 0.0074  | 0.0013 | 4.87E-09 |
| rs2590903   | 8 | 115,455,967 | A | G | 0.6661 | 0.0068  | 0.0011 | 9.44E-10 |
| rs191001562 | 8 | 117,497,229 | A | G | 0.9902 | -0.0225 | 0.0054 | 2.58E-05 |
| rs58836328  | 8 | 117,687,616 | A | T | 0.0953 | 0.0100  | 0.0018 | 1.74E-08 |
| rs3105764   | 8 | 118,734,726 | A | T | 0.6068 | -0.0056 | 0.0011 | 2.21E-07 |
| rs76555305  | 8 | 118,807,350 | A | G | 0.0314 | -0.0204 | 0.0031 | 3.66E-11 |
| rs72673939  | 8 | 118,867,693 | C | G | 0.1885 | -0.0111 | 0.0013 | 1.29E-16 |
| rs4876775   | 8 | 118,944,974 | A | G | 0.3152 | -0.0113 | 0.0011 | 1.65E-23 |
| rs76508452  | 8 | 120,040,254 | A | G | 0.0628 | 0.0095  | 0.0022 | 1.01E-05 |
| rs13278836  | 8 | 120,215,797 | A | G | 0.1155 | 0.0137  | 0.0016 | 5.10E-17 |
| rs11779779  | 8 | 123,767,773 | T | C | 0.2396 | 0.0060  | 0.0012 | 1.12E-06 |
| rs7002655   | 8 | 125,589,956 | A | G | 0.4425 | 0.0069  | 0.0011 | 5.12E-11 |
| rs1554962   | 8 | 127,380,069 | T | C | 0.5210 | 0.0056  | 0.0010 | 9.55E-08 |
| rs35932033  | 8 | 127,417,164 | A | G | 0.7518 | -0.0093 | 0.0012 | 2.46E-14 |
| rs2006853   | 8 | 127,600,255 | A | G | 0.5875 | 0.0092  | 0.0011 | 3.99E-18 |
| rs1367966   | 8 | 129,697,564 | T | C | 0.5232 | 0.0050  | 0.0010 | 1.76E-06 |
| rs9297781   | 8 | 130,029,366 | A | C | 0.2984 | -0.0069 | 0.0011 | 1.36E-09 |
| rs837080    | 8 | 130,925,116 | T | C | 0.5225 | -0.0098 | 0.0010 | 1.07E-20 |



|            |   |             |   |   |        |         |        |          |
|------------|---|-------------|---|---|--------|---------|--------|----------|
| rs4736735  | 8 | 132,029,508 | C | G | 0.5200 | 0.0068  | 0.0010 | 6.91E-11 |
| rs7839989  | 8 | 133,796,266 | T | C | 0.2241 | 0.0099  | 0.0013 | 3.58E-15 |
| rs853307   | 8 | 133,930,674 | T | C | 0.5265 | -0.0052 | 0.0010 | 6.53E-07 |
| rs35567946 | 8 | 135,416,103 | C | G | 0.5908 | -0.0099 | 0.0011 | 1.97E-20 |
| rs10448005 | 8 | 135,427,757 | T | C | 0.1210 | -0.0126 | 0.0016 | 4.50E-15 |
| rs13262684 | 8 | 136,015,169 | T | C | 0.5618 | -0.0059 | 0.0011 | 1.72E-08 |
| rs4130077  | 8 | 136,678,363 | T | C | 0.4583 | -0.0050 | 0.0011 | 1.67E-06 |
| rs438788   | 8 | 137,673,429 | A | T | 0.2067 | 0.0085  | 0.0013 | 8.17E-11 |
| rs17721326 | 8 | 139,310,138 | T | C | 0.2951 | 0.0087  | 0.0011 | 4.75E-14 |
| rs4909430  | 8 | 139,518,806 | T | C | 0.1279 | 0.0090  | 0.0017 | 1.18E-07 |
| rs10088129 | 8 | 141,060,242 | A | G | 0.5937 | 0.0051  | 0.0011 | 1.76E-06 |
| rs2977467  | 8 | 141,547,712 | T | C | 0.7868 | -0.0119 | 0.0013 | 2.94E-20 |
| rs11166986 | 8 | 141,656,155 | A | G | 0.4951 | -0.0088 | 0.0010 | 3.70E-17 |
| rs3739239  | 8 | 142,221,874 | A | G | 0.8806 | -0.0041 | 0.0016 | 1.21E-02 |
| rs2304282  | 8 | 142,229,543 | A | G | 0.4148 | 0.0110  | 0.0011 | 4.04E-25 |
| rs746839   | 8 | 142,617,261 | C | G | 0.6330 | 0.0099  | 0.0011 | 8.64E-20 |
| rs9324563  | 8 | 142,857,556 | T | C | 0.4311 | -0.0068 | 0.0011 | 2.49E-10 |
| rs11775108 | 8 | 143,110,476 | A | G | 0.4871 | -0.0093 | 0.0010 | 4.73E-19 |
| rs28540013 | 8 | 143,297,329 | T | C | 0.0738 | -0.0155 | 0.0020 | 1.69E-14 |
| rs14433675 | 8 | 143,356,114 | A | G | 0.0176 | 0.0396  | 0.0040 | 3.71E-23 |
| rs13276323 | 8 | 143,620,513 | A | G | 0.2130 | 0.0057  | 0.0013 | 9.71E-06 |
| rs2585183  | 8 | 143,766,059 | C | G | 0.5654 | -0.0072 | 0.0011 | 8.34E-12 |
| rs2721188  | 8 | 145,665,699 | T | C | 0.6133 | -0.0081 | 0.0011 | 8.50E-14 |
| rs11774212 | 8 | 145,686,505 | T | C | 0.5107 | 0.0157  | 0.0010 | 1.70E-50 |
| rs10810620 | 9 | 1,686,322   | A | G | 0.5027 | 0.0098  | 0.0010 | 6.90E-21 |
| rs4741600  | 9 | 1,757,753   | T | C | 0.3404 | 0.0158  | 0.0011 | 2.09E-46 |
| rs10970007 | 9 | 3,107,295   | T | C | 0.6773 | -0.0081 | 0.0011 | 3.87E-13 |
| rs75347228 | 9 | 3,357,770   | T | C | 0.0413 | 0.0129  | 0.0026 | 1.02E-06 |
| rs472544   | 9 | 3,934,575   | A | G | 0.7701 | 0.0069  | 0.0012 | 2.84E-08 |
| rs7856928  | 9 | 7,041,003   | T | C | 0.6169 | -0.0066 | 0.0011 | 7.09E-10 |
| rs10977035 | 9 | 8,393,528   | A | G | 0.7397 | -0.0065 | 0.0012 | 4.49E-08 |
| rs10815863 | 9 | 8,418,224   | T | C | 0.1302 | -0.0101 | 0.0018 | 1.65E-08 |
| rs35583726 | 9 | 8,533,697   | A | G | 0.8334 | 0.0119  | 0.0014 | 3.13E-17 |
| rs10815961 | 9 | 8,818,758   | T | C | 0.4970 | 0.0063  | 0.0010 | 1.30E-09 |
| rs10122845 | 9 | 9,388,454   | T | C | 0.5404 | 0.0045  | 0.0010 | 2.16E-05 |
| rs2025152  | 9 | 10,265,725  | A | G | 0.6691 | 0.0078  | 0.0011 | 1.80E-12 |
| rs1329605  | 9 | 10,805,894  | T | C | 0.2804 | 0.0075  | 0.0012 | 1.84E-10 |
| rs2220468  | 9 | 11,190,741  | A | T | 0.3118 | 0.0082  | 0.0011 | 3.80E-13 |
| rs7043405  | 9 | 11,442,765  | T | C | 0.4329 | 0.0092  | 0.0011 | 2.57E-18 |
| rs2183132  | 9 | 13,066,353  | A | T | 0.7700 | 0.0061  | 0.0012 | 8.67E-07 |
| rs3780577  | 9 | 13,211,404  | C | G | 0.2999 | -0.0066 | 0.0011 | 7.46E-09 |
| rs67311478 | 9 | 13,973,013  | A | G | 0.5969 | -0.0051 | 0.0011 | 2.09E-06 |
| rs7045411  | 9 | 14,145,058  | A | G | 0.8494 | 0.0193  | 0.0015 | 1.52E-39 |
| rs10810112 | 9 | 14,199,909  | T | C | 0.1336 | -0.0065 | 0.0015 | 2.34E-05 |
| rs19228214 | 9 | 14,240,524  | A | G | 0.9960 | 0.0440  | 0.0085 | 2.28E-07 |
| rs10810145 | 9 | 14,430,692  | A | G | 0.4062 | 0.0093  | 0.0011 | 3.72E-18 |
| rs303745   | 9 | 14,491,637  | A | G | 0.6578 | 0.0070  | 0.0011 | 1.70E-10 |
| rs12685522 | 9 | 14,786,962  | T | C | 0.4945 | 0.0079  | 0.0010 | 3.97E-14 |

|             |   |             |   |   |        |         |        |          |
|-------------|---|-------------|---|---|--------|---------|--------|----------|
| rs473384    | 9 | 15,214,958  | A | C | 0.4185 | -0.0051 | 0.0011 | 1.68E-06 |
| rs4281189   | 9 | 15,557,752  | A | G | 0.4378 | 0.0078  | 0.0011 | 1.44E-13 |
| rs59234174  | 9 | 16,730,258  | T | C | 0.1566 | -0.0103 | 0.0014 | 9.42E-13 |
| rs180986360 | 9 | 17,813,914  | T | C | 0.0012 | 0.0613  | 0.0158 | 1.07E-04 |
| rs6475368   | 9 | 19,779,939  | T | C | 0.5509 | -0.0060 | 0.0011 | 1.23E-08 |
| rs10965400  | 9 | 22,607,894  | T | C | 0.6309 | 0.0067  | 0.0011 | 6.25E-10 |
| rs10965791  | 9 | 23,348,241  | T | C | 0.8556 | 0.0115  | 0.0015 | 1.12E-14 |
| rs4557790   | 9 | 23,349,982  | A | C | 0.5537 | 0.0205  | 0.0011 | 4.88E-84 |
| rs10757431  | 9 | 23,400,379  | A | T | 0.2455 | 0.0015  | 0.0012 | 2.21E-01 |
| rs1410847   | 9 | 23,710,663  | A | T | 0.9534 | -0.0101 | 0.0025 | 4.90E-05 |
| rs2026037   | 9 | 23,762,529  | T | C | 0.8408 | 0.0154  | 0.0014 | 4.56E-27 |
| rs7864479   | 9 | 25,247,018  | T | C | 0.8845 | -0.0071 | 0.0016 | 1.62E-05 |
| rs4879541   | 9 | 27,533,452  | T | C | 0.4892 | -0.0056 | 0.0010 | 1.03E-07 |
| rs10812665  | 9 | 27,808,093  | A | T | 0.4478 | -0.0065 | 0.0011 | 9.45E-10 |
| rs10968218  | 9 | 27,946,527  | T | G | 0.6568 | 0.0066  | 0.0011 | 1.87E-09 |
| rs10813085  | 9 | 29,427,472  | T | C | 0.1947 | 0.0072  | 0.0013 | 4.35E-08 |
| rs10813533  | 9 | 31,319,287  | T | C | 0.8740 | 0.0102  | 0.0016 | 1.24E-10 |
| rs4879832   | 9 | 34,830,432  | T | C | 0.3772 | -0.0064 | 0.0011 | 3.56E-09 |
| rs10123310  | 9 | 37,972,512  | T | C | 0.4919 | 0.0056  | 0.0010 | 8.77E-08 |
| rs2781537   | 9 | 72,078,593  | T | C | 0.5738 | 0.0081  | 0.0011 | 2.25E-14 |
| rs62543169  | 9 | 73,069,133  | T | C | 0.4276 | -0.0116 | 0.0011 | 3.33E-28 |
| rs117243900 | 9 | 73,304,519  | T | C | 0.0408 | -0.0151 | 0.0027 | 1.16E-08 |
| rs117023600 | 9 | 75,040,946  | A | G | 0.0410 | 0.0153  | 0.0026 | 6.93E-09 |
| rs517674    | 9 | 76,908,607  | C | G | 0.2644 | 0.0080  | 0.0012 | 1.72E-11 |
| rs978010    | 9 | 77,190,380  | T | C | 0.8409 | -0.0062 | 0.0014 | 1.60E-05 |
| rs10781342  | 9 | 78,778,550  | T | C | 0.2083 | 0.0083  | 0.0013 | 1.32E-10 |
| rs10867226  | 9 | 81,232,453  | T | C | 0.2594 | 0.0067  | 0.0012 | 1.72E-08 |
| rs10867306  | 9 | 81,547,131  | A | T | 0.3917 | 0.0093  | 0.0011 | 4.15E-18 |
| rs34532817  | 9 | 81,914,318  | T | C | 0.0628 | 0.0060  | 0.0022 | 5.32E-03 |
| rs9886703   | 9 | 82,246,351  | A | T | 0.1671 | -0.0112 | 0.0014 | 1.22E-15 |
| rs4877516   | 9 | 82,442,731  | A | T | 0.4380 | -0.0091 | 0.0011 | 5.43E-18 |
| rs10867548  | 9 | 83,093,792  | A | G | 0.8557 | 0.0093  | 0.0015 | 4.33E-10 |
| rs7035315   | 9 | 83,231,511  | A | G | 0.6281 | -0.0086 | 0.0011 | 1.76E-15 |
| rs11139717  | 9 | 85,349,952  | A | G | 0.9345 | -0.0105 | 0.0021 | 7.78E-07 |
| rs12339003  | 9 | 86,018,406  | C | G | 0.1076 | -0.0061 | 0.0017 | 3.17E-04 |
| rs10124443  | 9 | 86,333,661  | T | C | 0.6280 | 0.0059  | 0.0011 | 5.82E-08 |
| rs1187326   | 9 | 87,285,915  | T | C | 0.7714 | 0.0094  | 0.0012 | 4.69E-14 |
| rs12238534  | 9 | 87,547,350  | T | G | 0.1341 | 0.0071  | 0.0015 | 4.37E-06 |
| rs2841453   | 9 | 88,014,875  | A | G | 0.7574 | -0.0102 | 0.0012 | 6.76E-17 |
| rs2316182   | 9 | 91,813,985  | A | G | 0.8745 | 0.0135  | 0.0016 | 1.39E-17 |
| rs7040995   | 9 | 92,226,172  | C | G | 0.5320 | 0.0116  | 0.0010 | 3.01E-28 |
| rs10821123  | 9 | 96,169,561  | A | G | 0.3898 | 0.0106  | 0.0011 | 6.38E-23 |
| rs10992836  | 9 | 96,422,420  | T | C | 0.3407 | -0.0116 | 0.0011 | 5.62E-26 |
| rs3118765   | 9 | 97,027,424  | A | G | 0.6166 | 0.0087  | 0.0011 | 6.14E-16 |
| rs357564    | 9 | 98,209,594  | A | G | 0.3362 | -0.0075 | 0.0011 | 2.13E-11 |
| rs111821072 | 9 | 99,084,793  | T | C | 0.1544 | 0.0153  | 0.0015 | 4.70E-26 |
| rs7862197   | 9 | 102,204,754 | T | C | 0.6561 | 0.0093  | 0.0011 | 4.46E-17 |
| rs2787370   | 9 | 103,048,677 | A | C | 0.9004 | -0.0120 | 0.0018 | 8.07E-12 |

|             |   |             |   |   |        |         |        |          |
|-------------|---|-------------|---|---|--------|---------|--------|----------|
| rs141159401 | 9 | 103,144,341 | A | C | 0.9769 | 0.0211  | 0.0035 | 2.65E-09 |
| rs4294245   | 9 | 103,510,680 | T | G | 0.6309 | -0.0050 | 0.0011 | 3.59E-06 |
| rs10819962  | 9 | 104,413,645 | A | G | 0.2859 | -0.0074 | 0.0012 | 1.87E-10 |
| rs2417447   | 9 | 106,417,011 | T | C | 0.4501 | -0.0076 | 0.0011 | 4.70E-13 |
| rs62583461  | 9 | 106,763,396 | A | G | 0.0677 | 0.0089  | 0.0021 | 2.25E-05 |
| rs7033165   | 9 | 108,384,074 | A | G | 0.9013 | 0.0094  | 0.0018 | 8.90E-08 |
| rs111453717 | 9 | 108,880,564 | A | G | 0.9628 | 0.0172  | 0.0028 | 5.24E-10 |
| rs10978672  | 9 | 109,682,501 | A | G | 0.8519 | 0.0139  | 0.0015 | 4.23E-21 |
| rs698472    | 9 | 109,898,310 | T | C | 0.6640 | -0.0050 | 0.0011 | 6.34E-06 |
| rs7026972   | 9 | 111,750,523 | T | C | 0.6439 | -0.0115 | 0.0011 | 7.08E-26 |
| rs6477724   | 9 | 112,527,594 | C | G | 0.3815 | -0.0050 | 0.0011 | 3.83E-06 |
| rs4978557   | 9 | 116,635,490 | A | G | 0.4257 | -0.0058 | 0.0011 | 5.76E-08 |
| rs7847231   | 9 | 118,209,071 | A | C | 0.6141 | -0.0058 | 0.0011 | 8.62E-08 |
| rs34140540  | 9 | 119,225,909 | T | C | 0.8156 | -0.0086 | 0.0014 | 1.51E-10 |
| rs10759882  | 9 | 119,733,639 | T | C | 0.7186 | -0.0073 | 0.0012 | 3.07E-10 |
| rs10983487  | 9 | 119,824,051 | T | C | 0.5758 | 0.0070  | 0.0011 | 3.06E-11 |
| rs10818013  | 9 | 119,961,784 | T | C | 0.3518 | -0.0055 | 0.0011 | 5.73E-07 |
| rs492121    | 9 | 120,700,339 | A | G | 0.6231 | -0.0044 | 0.0011 | 4.42E-05 |
| rs1410210   | 9 | 121,065,220 | A | G | 0.7735 | 0.0083  | 0.0013 | 3.36E-11 |
| rs115795    | 9 | 121,883,165 | A | G | 0.2414 | -0.0085 | 0.0012 | 4.00E-12 |
| rs10984444  | 9 | 121,980,347 | A | C | 0.5076 | -0.0116 | 0.0010 | 1.02E-28 |
| rs10739535  | 9 | 122,071,394 | T | C | 0.4431 | 0.0035  | 0.0011 | 8.19E-04 |
| rs71507581  | 9 | 122,281,192 | T | C | 0.4911 | -0.0062 | 0.0011 | 4.25E-09 |
| rs1468643   | 9 | 122,334,719 | A | G | 0.5094 | 0.0067  | 0.0010 | 1.28E-10 |
| rs12336873  | 9 | 122,675,981 | T | C | 0.3941 | 0.0054  | 0.0011 | 5.97E-07 |
| rs10739569  | 9 | 123,361,027 | C | G | 0.7001 | -0.0072 | 0.0011 | 2.49E-10 |
| rs7032484   | 9 | 124,617,919 | A | G | 0.5660 | 0.0130  | 0.0011 | 6.76E-35 |
| rs7468947   | 9 | 124,978,011 | A | G | 0.2330 | -0.0089 | 0.0012 | 8.83E-13 |
| rs28661002  | 9 | 126,335,211 | T | C | 0.7570 | 0.0128  | 0.0012 | 9.56E-26 |
| rs10986157  | 9 | 126,718,770 | T | C | 0.7342 | -0.0057 | 0.0012 | 1.30E-06 |
| rs7867942   | 9 | 126,771,321 | T | C | 0.9417 | 0.0129  | 0.0022 | 8.65E-09 |
| rs631287    | 9 | 128,412,676 | A | G | 0.5583 | 0.0085  | 0.0011 | 7.04E-16 |
| rs2041543   | 9 | 129,197,579 | T | C | 0.1587 | 0.0091  | 0.0014 | 1.75E-10 |
| rs10819272  | 9 | 129,954,334 | T | C | 0.5954 | 0.0070  | 0.0011 | 6.27E-11 |
| rs504434    | 9 | 130,477,768 | A | G | 0.5254 | 0.0069  | 0.0010 | 5.71E-11 |
| rs74532781  | 9 | 130,979,716 | A | G | 0.1436 | -0.0119 | 0.0015 | 1.50E-15 |
| rs2296956   | 9 | 134,404,784 | C | G | 0.3597 | 0.0063  | 0.0011 | 9.90E-09 |
| rs9411336   | 9 | 134,901,901 | T | C | 0.3234 | -0.0128 | 0.0011 | 1.56E-30 |
| rs59210554  | 9 | 135,012,819 | A | G | 0.7679 | 0.0050  | 0.0012 | 5.64E-05 |
| rs7853213   | 9 | 135,506,947 | T | C | 0.2383 | 0.0122  | 0.0012 | 2.25E-23 |
| rs3815183   | 9 | 135,737,520 | T | C | 0.8057 | -0.0084 | 0.0013 | 1.95E-10 |
| rs72766630  | 9 | 136,926,791 | T | G | 0.1757 | -0.0078 | 0.0014 | 1.36E-08 |
| rs10858353  | 9 | 138,039,129 | T | C | 0.2012 | -0.0060 | 0.0013 | 4.44E-06 |
| rs55816769  | 9 | 138,656,783 | T | C | 0.7599 | -0.0081 | 0.0012 | 5.96E-11 |
| rs7469569   | 9 | 139,926,402 | T | C | 0.3575 | 0.0095  | 0.0011 | 3.57E-18 |
| rs28458909  | 9 | 140,257,189 | T | C | 0.1235 | -0.0190 | 0.0016 | 5.98E-31 |
| rs863701    | 9 | 140,470,119 | A | G | 0.7996 | 0.0070  | 0.0013 | 9.29E-08 |

---

Notes: The COJO analysis was performed as described in Supplementary Section 2.2.7. Chromosome (Chr) and base pair (E) report the original values from the additive GWAS meta-analysis. "COJO effect size", "COJO S.E." and "COJO  $P$  value" column association is "primary" if it is identified as a lead SNP when we apply our clumping algorithm (see Supplementary Section algorithm, i.e. if it has pairwise  $r^2 > 0.1$  with at least one primary SNP. The column "Secondary associations in locus (if prim:

**COJO Analysis of the additive *EduYears* analys**

| COJO effect size | COJO S.E. | COJO <i>P</i> -value | <i>N</i>  | Primary or secondary? | Secondary associations in locus (if primary) |
|------------------|-----------|----------------------|-----------|-----------------------|----------------------------------------------|
| -0.0071          | 0.0011    | 7.59E-11             | 3,037,460 | primary               | -                                            |
| 0.0076           | 0.0011    | 1.01E-11             | 3,037,470 | primary               | -                                            |
| -0.0061          | 0.0011    | 2.01E-08             | 3,037,460 | primary               | -                                            |
| 0.0123           | 0.0011    | 7.36E-29             | 3,037,420 | primary               | -                                            |
| 0.0130           | 0.0020    | 2.94E-11             | 3,037,500 | primary               | -                                            |
| 0.0065           | 0.0011    | 8.56E-10             | 3,037,480 | primary               | -                                            |
| 0.0121           | 0.0019    | 3.55E-10             | 3,017,310 | primary               | -                                            |
| -0.0076          | 0.0011    | 5.70E-12             | 3,020,800 | primary               | -                                            |
| -0.0069          | 0.0013    | 3.76E-08             | 3,037,480 | primary               | -                                            |
| 0.0265           | 0.0044    | 1.65E-09             | 2,971,410 | primary               | -                                            |
| -0.0088          | 0.0012    | 1.23E-12             | 3,037,460 | primary               | -                                            |
| 0.0098           | 0.0011    | 1.28E-20             | 3,037,450 | primary               | -                                            |
| 0.0114           | 0.0012    | 4.73E-20             | 3,015,690 | primary               | -                                            |
| 0.0173           | 0.0017    | 1.30E-24             | 3,037,450 | primary               | rs9423837                                    |
| 0.0086           | 0.0014    | 1.99E-10             | 3,037,490 | secondary             | N/A                                          |
| -0.0105          | 0.0011    | 1.97E-23             | 3,035,710 | primary               | -                                            |
| 0.0084           | 0.0012    | 2.12E-12             | 3,031,550 | primary               | -                                            |
| 0.0091           | 0.0011    | 2.46E-17             | 3,016,570 | primary               | -                                            |
| -0.0089          | 0.0011    | 4.35E-17             | 3,000,790 | primary               | -                                            |
| -0.0076          | 0.0011    | 3.47E-13             | 3,036,900 | primary               | -                                            |
| 0.0155           | 0.0017    | 2.42E-20             | 3,037,430 | primary               | -                                            |
| 0.0063           | 0.0011    | 5.79E-09             | 3,037,480 | primary               | -                                            |
| 0.0115           | 0.0016    | 3.47E-12             | 3,037,440 | primary               | -                                            |
| 0.0100           | 0.0013    | 2.01E-15             | 3,020,770 | primary               | -                                            |
| -0.0175          | 0.0030    | 5.28E-09             | 3,016,320 | primary               | -                                            |
| 0.0093           | 0.0011    | 3.58E-17             | 2,988,300 | primary               | -                                            |
| 0.0106           | 0.0013    | 5.89E-17             | 3,034,940 | primary               | -                                            |
| -0.0063          | 0.0011    | 4.74E-09             | 3,036,670 | primary               | -                                            |
| 0.0099           | 0.0014    | 3.67E-13             | 3,036,660 | primary               | -                                            |
| 0.0064           | 0.0011    | 7.13E-09             | 3,036,660 | primary               | -                                            |
| 0.0104           | 0.0013    | 2.67E-15             | 3,036,670 | primary               | -                                            |
| 0.0098           | 0.0013    | 1.49E-14             | 3,036,680 | primary               | -                                            |
| 0.0088           | 0.0011    | 8.83E-17             | 3,034,930 | primary               | -                                            |
| -0.0133          | 0.0022    | 1.19E-09             | 3,036,680 | primary               | -                                            |
| 0.0069           | 0.0012    | 8.27E-09             | 2,986,730 | primary               | -                                            |
| 0.0104           | 0.0011    | 7.73E-22             | 3,036,610 | primary               | -                                            |
| -0.0090          | 0.0014    | 6.21E-11             | 3,036,690 | primary               | -                                            |
| 0.0182           | 0.0027    | 2.97E-11             | 2,999,960 | primary               | -                                            |
| -0.0067          | 0.0011    | 1.39E-09             | 2,953,910 | primary               | -                                            |
| -0.0090          | 0.0014    | 4.69E-10             | 3,013,450 | primary               | -                                            |
| 0.0095           | 0.0015    | 3.98E-10             | 3,036,700 | primary               | -                                            |
| 0.0239           | 0.0034    | 2.88E-12             | 2,852,260 | primary               | -                                            |
| -0.0091          | 0.0011    | 2.32E-17             | 3,036,620 | primary               | -                                            |
| -0.0079          | 0.0013    | 3.65E-10             | 3,036,660 | primary               | -                                            |
| 0.0091           | 0.0011    | 6.19E-18             | 3,036,630 | primary               | -                                            |
| 0.0076           | 0.0011    | 8.45E-13             | 3,036,660 | primary               | -                                            |

|         |        |          |           |         |   |
|---------|--------|----------|-----------|---------|---|
| -0.0093 | 0.0011 | 4.76E-17 | 3,018,270 | primary | - |
| 0.0167  | 0.0025 | 2.00E-11 | 2,983,130 | primary | - |
| -0.0108 | 0.0011 | 7.22E-22 | 3,036,670 | primary | - |
| -0.0062 | 0.0011 | 6.69E-09 | 3,034,970 | primary | - |
| 0.0161  | 0.0011 | 7.42E-52 | 3,036,530 | primary | - |
| 0.0077  | 0.0011 | 5.20E-13 | 3,034,910 | primary | - |
| 0.0092  | 0.0014 | 6.26E-11 | 3,034,950 | primary | - |
| -0.0094 | 0.0016 | 3.24E-09 | 2,552,050 | primary | - |
| 0.0124  | 0.0017 | 7.21E-14 | 3,036,100 | primary | - |
| -0.0072 | 0.0012 | 1.35E-09 | 3,036,690 | primary | - |
| -0.0089 | 0.0011 | 8.68E-15 | 3,034,890 | primary | - |
| -0.0082 | 0.0014 | 1.63E-09 | 3,036,630 | primary | - |
| 0.0090  | 0.0011 | 3.78E-15 | 3,032,810 | primary | - |
| 0.0099  | 0.0014 | 1.04E-12 | 3,034,970 | primary | - |
| 0.0131  | 0.0016 | 1.10E-16 | 2,999,250 | primary | - |
| -0.0102 | 0.0012 | 2.03E-16 | 3,036,670 | primary | - |
| 0.0080  | 0.0011 | 2.47E-12 | 3,034,960 | primary | - |
| 0.0060  | 0.0011 | 2.87E-08 | 3,034,210 | primary | - |
| -0.0122 | 0.0019 | 1.04E-10 | 3,036,150 | primary | - |
| -0.0089 | 0.0011 | 1.02E-15 | 3,009,670 | primary | - |
| -0.0100 | 0.0012 | 7.20E-16 | 3,018,410 | primary | - |
| -0.0075 | 0.0014 | 2.36E-08 | 2,901,400 | primary | - |
| -0.0064 | 0.0011 | 2.15E-08 | 3,036,640 | primary | - |
| -0.0110 | 0.0012 | 2.31E-20 | 3,036,670 | primary | - |
| -0.0112 | 0.0016 | 2.95E-12 | 3,016,880 | primary | - |
| -0.0064 | 0.0011 | 1.18E-09 | 3,034,980 | primary | - |
| -0.0077 | 0.0011 | 4.09E-13 | 3,036,680 | primary | - |
| 0.0068  | 0.0011 | 6.98E-10 | 3,036,680 | primary | - |
| -0.0090 | 0.0012 | 1.71E-14 | 3,036,690 | primary | - |
| 0.0070  | 0.0011 | 1.31E-10 | 3,036,660 | primary | - |
| -0.0086 | 0.0011 | 1.08E-14 | 3,036,670 | primary | - |
| 0.0148  | 0.0012 | 1.39E-35 | 3,036,620 | primary | - |
| -0.0080 | 0.0013 | 1.91E-10 | 3,036,670 | primary | - |
| 0.0068  | 0.0012 | 4.06E-08 | 3,036,700 | primary | - |
| -0.0072 | 0.0013 | 4.55E-08 | 3,034,960 | primary | - |
| -0.0083 | 0.0011 | 1.40E-14 | 3,036,640 | primary | - |
| -0.0059 | 0.0011 | 2.03E-08 | 3,034,840 | primary | - |
| -0.0073 | 0.0011 | 1.00E-11 | 3,036,110 | primary | - |
| 0.0153  | 0.0026 | 6.56E-09 | 2,960,410 | primary | - |
| -0.0081 | 0.0012 | 3.94E-12 | 3,022,390 | primary | - |
| 0.0064  | 0.0011 | 9.37E-10 | 3,036,650 | primary | - |
| -0.0065 | 0.0011 | 6.41E-10 | 3,036,670 | primary | - |
| -0.0095 | 0.0013 | 8.51E-13 | 3,036,670 | primary | - |
| 0.0082  | 0.0011 | 1.98E-13 | 3,020,880 | primary | - |
| -0.0119 | 0.0011 | 2.88E-26 | 3,034,900 | primary | - |
| -0.0077 | 0.0011 | 3.95E-13 | 3,035,790 | primary | - |
| 0.0088  | 0.0011 | 1.12E-14 | 3,036,620 | primary | - |
| 0.0094  | 0.0012 | 2.69E-15 | 3,036,680 | primary | - |

|         |        |          |           |           |           |
|---------|--------|----------|-----------|-----------|-----------|
| 0.0151  | 0.0012 | 2.62E-34 | 3,036,480 | primary   | rs2479552 |
| 0.0085  | 0.0012 | 1.24E-12 | 3,036,570 | secondary | N/A       |
| -0.0094 | 0.0012 | 4.51E-16 | 3,036,570 | primary   | -         |
| -0.0096 | 0.0013 | 4.94E-14 | 3,033,180 | primary   | -         |
| 0.0112  | 0.0017 | 3.07E-11 | 2,514,250 | primary   | -         |
| 0.0189  | 0.0013 | 1.73E-45 | 3,036,520 | primary   | rs1490176 |
| 0.0101  | 0.0013 | 2.19E-14 | 3,036,700 | secondary | N/A       |
| 0.0111  | 0.0017 | 2.02E-11 | 3,036,600 | primary   | -         |
| -0.0136 | 0.0013 | 4.59E-26 | 3,034,700 | primary   | -         |
| 0.0138  | 0.0015 | 3.57E-21 | 3,034,100 | primary   | -         |
| 0.0129  | 0.0021 | 6.56E-10 | 3,034,230 | primary   | -         |
| -0.0136 | 0.0020 | 5.70E-12 | 3,035,750 | primary   | -         |
| -0.0138 | 0.0015 | 8.01E-20 | 3,036,630 | primary   | -         |
| 0.0063  | 0.0011 | 2.16E-09 | 3,036,130 | primary   | -         |
| -0.0088 | 0.0011 | 4.96E-15 | 3,036,670 | primary   | -         |
| -0.0081 | 0.0011 | 2.89E-14 | 3,017,660 | primary   | -         |
| -0.0217 | 0.0036 | 1.77E-09 | 3,002,350 | primary   | -         |
| -0.0121 | 0.0019 | 3.99E-10 | 3,036,700 | primary   | -         |
| 0.0102  | 0.0012 | 5.15E-18 | 3,034,930 | primary   | -         |
| -0.0094 | 0.0011 | 7.92E-19 | 3,036,660 | primary   | -         |
| -0.0067 | 0.0011 | 1.43E-09 | 3,034,730 | primary   | -         |
| 0.0063  | 0.0011 | 1.70E-08 | 3,034,740 | primary   | -         |
| 0.0085  | 0.0012 | 5.41E-12 | 3,036,660 | primary   | -         |
| 0.0081  | 0.0011 | 3.59E-14 | 3,020,850 | primary   | -         |
| 0.0078  | 0.0011 | 1.20E-12 | 2,999,490 | primary   | -         |
| -0.0063 | 0.0011 | 2.88E-09 | 3,006,480 | primary   | -         |
| -0.0103 | 0.0018 | 1.72E-08 | 2,991,120 | primary   | -         |
| 0.0073  | 0.0012 | 3.00E-10 | 3,003,920 | primary   | -         |
| 0.0095  | 0.0011 | 1.34E-19 | 3,036,640 | primary   | -         |
| -0.0132 | 0.0012 | 5.48E-28 | 3,004,830 | primary   | -         |
| 0.0079  | 0.0011 | 9.15E-14 | 3,031,990 | primary   | -         |
| 0.0105  | 0.0012 | 1.52E-17 | 3,031,410 | primary   | -         |
| -0.0072 | 0.0011 | 8.70E-12 | 3,032,260 | primary   | -         |
| 0.0074  | 0.0013 | 4.13E-09 | 3,011,190 | primary   | -         |
| 0.0446  | 0.0057 | 6.77E-15 | 2,902,990 | primary   | -         |
| 0.0119  | 0.0013 | 4.12E-19 | 3,029,130 | primary   | -         |
| 0.0102  | 0.0014 | 1.76E-13 | 2,999,140 | primary   | -         |
| 0.0077  | 0.0011 | 2.48E-13 | 3,033,810 | primary   | -         |
| 0.0074  | 0.0011 | 6.57E-11 | 3,035,760 | primary   | -         |
| -0.0153 | 0.0012 | 2.14E-39 | 3,037,330 | primary   | -         |
| 0.0095  | 0.0015 | 6.61E-10 | 3,037,480 | primary   | -         |
| 0.0088  | 0.0014 | 2.79E-10 | 3,037,470 | primary   | -         |
| -0.0075 | 0.0013 | 6.29E-09 | 3,037,460 | primary   | -         |
| -0.0067 | 0.0012 | 1.14E-08 | 2,524,880 | primary   | -         |
| -0.0091 | 0.0011 | 3.82E-18 | 3,037,470 | primary   | -         |
| -0.0058 | 0.0011 | 3.50E-08 | 3,037,500 | primary   | -         |
| 0.0089  | 0.0012 | 1.20E-14 | 3,037,440 | primary   | -         |
| 0.0079  | 0.0012 | 6.05E-11 | 3,035,780 | primary   | -         |

|         |        |          |           |           |            |
|---------|--------|----------|-----------|-----------|------------|
| -0.0097 | 0.0016 | 2.58E-09 | 3,036,940 | primary   | -          |
| 0.0067  | 0.0011 | 4.90E-10 | 3,035,790 | primary   | -          |
| -0.0085 | 0.0011 | 6.51E-16 | 3,029,440 | primary   | -          |
| -0.0148 | 0.0012 | 1.81E-33 | 3,037,410 | primary   | -          |
| -0.0099 | 0.0011 | 4.50E-19 | 3,037,420 | primary   | -          |
| -0.0197 | 0.0019 | 4.77E-26 | 3,036,490 | primary   | -          |
| -0.0111 | 0.0011 | 2.42E-24 | 3,036,860 | primary   | -          |
| 0.0171  | 0.0030 | 1.97E-08 | 3,035,840 | primary   | -          |
| 0.0080  | 0.0011 | 5.72E-14 | 3,035,640 | primary   | -          |
| 0.0171  | 0.0018 | 8.83E-22 | 3,020,610 | primary   | -          |
| 0.0061  | 0.0011 | 1.76E-08 | 3,037,510 | primary   | -          |
| -0.0071 | 0.0011 | 1.99E-11 | 3,037,470 | primary   | -          |
| 0.0118  | 0.0013 | 6.77E-19 | 3,037,460 | primary   | -          |
| 0.0139  | 0.0020 | 6.55E-12 | 3,023,510 | primary   | -          |
| -0.0098 | 0.0014 | 7.98E-13 | 3,036,570 | primary   | -          |
| 0.0120  | 0.0021 | 1.03E-08 | 3,037,470 | primary   | -          |
| 0.0064  | 0.0011 | 3.08E-09 | 3,035,740 | primary   | -          |
| -0.0069 | 0.0011 | 1.56E-10 | 3,037,500 | primary   | -          |
| 0.0206  | 0.0016 | 2.62E-40 | 3,037,420 | primary   | -          |
| 0.0202  | 0.0024 | 1.76E-17 | 3,015,000 | primary   | -          |
| 0.0082  | 0.0011 | 2.32E-13 | 3,000,870 | primary   | -          |
| -0.0112 | 0.0011 | 2.29E-23 | 3,037,430 | primary   | -          |
| -0.0200 | 0.0032 | 3.89E-10 | 2,962,240 | primary   | -          |
| -0.0262 | 0.0030 | 1.16E-18 | 2,968,660 | primary   | -          |
| 0.0100  | 0.0011 | 8.90E-20 | 3,022,940 | primary   | -          |
| 0.0139  | 0.0015 | 1.74E-19 | 3,001,920 | primary   | -          |
| -0.0310 | 0.0043 | 8.15E-13 | 2,956,440 | primary   | -          |
| 0.0075  | 0.0011 | 1.39E-11 | 3,035,500 | primary   | -          |
| -0.0135 | 0.0013 | 3.95E-24 | 3,034,970 | primary   | -          |
| 0.0220  | 0.0032 | 5.73E-12 | 2,990,850 | primary   | -          |
| 0.0132  | 0.0012 | 3.20E-26 | 2,998,830 | primary   | -          |
| -0.0081 | 0.0011 | 3.52E-14 | 2,970,040 | primary   | -          |
| 0.0082  | 0.0012 | 1.63E-11 | 2,272,180 | primary   | -          |
| 0.0108  | 0.0012 | 7.96E-20 | 3,034,430 | primary   | -          |
| 0.0184  | 0.0029 | 2.10E-10 | 3,035,400 | primary   | -          |
| -0.0097 | 0.0016 | 6.46E-10 | 3,023,240 | primary   | -          |
| -0.0158 | 0.0016 | 2.41E-24 | 3,036,880 | primary   | -          |
| 0.0097  | 0.0014 | 1.82E-11 | 3,037,390 | primary   | rs11601122 |
| 0.0118  | 0.0018 | 1.79E-10 | 3,035,670 | secondary | N/A        |
| 0.0238  | 0.0032 | 2.22E-13 | 2,961,340 | primary   | -          |
| -0.0094 | 0.0011 | 8.69E-17 | 3,037,430 | primary   | -          |
| 0.0167  | 0.0013 | 2.00E-40 | 3,023,310 | primary   | -          |
| -0.0082 | 0.0011 | 2.89E-14 | 3,037,470 | primary   | -          |
| 0.0088  | 0.0011 | 3.75E-16 | 3,037,430 | primary   | -          |
| 0.0164  | 0.0017 | 1.20E-21 | 3,037,420 | primary   | -          |
| 0.0099  | 0.0014 | 8.55E-13 | 3,037,470 | primary   | -          |
| -0.0076 | 0.0011 | 8.69E-12 | 3,035,750 | primary   | -          |
| 0.0085  | 0.0011 | 8.64E-16 | 3,037,440 | primary   | -          |



|         |        |          |           |           |            |
|---------|--------|----------|-----------|-----------|------------|
| 0.0070  | 0.0011 | 1.05E-10 | 3,035,210 | primary   | -          |
| -0.0093 | 0.0014 | 9.75E-11 | 3,037,480 | primary   | -          |
| 0.0082  | 0.0011 | 2.84E-13 | 3,035,760 | primary   | -          |
| 0.0073  | 0.0011 | 4.22E-12 | 3,033,350 | primary   | -          |
| -0.0115 | 0.0011 | 5.86E-25 | 3,037,440 | primary   | -          |
| 0.0071  | 0.0012 | 2.79E-09 | 3,035,750 | primary   | -          |
| -0.0079 | 0.0014 | 2.22E-08 | 3,037,480 | primary   | -          |
| -0.0092 | 0.0011 | 5.89E-18 | 3,037,470 | primary   | -          |
| -0.0107 | 0.0011 | 7.66E-21 | 3,037,440 | primary   | -          |
| -0.0072 | 0.0011 | 6.16E-11 | 3,037,450 | primary   | -          |
| -0.0068 | 0.0011 | 1.24E-09 | 3,037,460 | primary   | -          |
| 0.0110  | 0.0011 | 2.06E-25 | 3,037,420 | primary   | -          |
| 0.0097  | 0.0015 | 6.10E-11 | 3,035,040 | primary   | -          |
| -0.0092 | 0.0014 | 2.47E-11 | 3,035,740 | primary   | -          |
| 0.0075  | 0.0011 | 1.38E-12 | 3,036,560 | primary   | -          |
| 0.0077  | 0.0012 | 1.38E-10 | 2,930,090 | primary   | -          |
| 0.0152  | 0.0022 | 1.74E-12 | 752,690   | primary   | -          |
| 0.0109  | 0.0011 | 1.25E-23 | 3,037,410 | primary   | -          |
| 0.0062  | 0.0011 | 3.76E-09 | 3,035,790 | primary   | -          |
| 0.0062  | 0.0011 | 1.48E-08 | 3,037,500 | primary   | -          |
| 0.0077  | 0.0012 | 3.32E-11 | 3,037,450 | primary   | -          |
| 0.0090  | 0.0011 | 4.69E-17 | 3,037,430 | primary   | -          |
| -0.0080 | 0.0011 | 3.71E-13 | 3,034,200 | primary   | -          |
| -0.0084 | 0.0011 | 1.31E-13 | 3,037,480 | primary   | -          |
| 0.0069  | 0.0011 | 1.99E-10 | 3,037,490 | primary   | -          |
| -0.0102 | 0.0016 | 1.01E-10 | 3,037,480 | primary   | -          |
| -0.0123 | 0.0013 | 1.10E-21 | 3,037,440 | primary   | -          |
| -0.0081 | 0.0012 | 4.85E-12 | 3,035,730 | primary   | rs1939800  |
| 0.0066  | 0.0012 | 1.26E-08 | 3,035,480 | secondary | N/A        |
| -0.0074 | 0.0011 | 2.71E-12 | 3,037,450 | primary   | -          |
| -0.0111 | 0.0011 | 5.38E-22 | 3,037,450 | primary   | -          |
| 0.0059  | 0.0011 | 2.95E-08 | 3,034,260 | primary   | -          |
| -0.0099 | 0.0014 | 8.37E-13 | 3,037,490 | primary   | -          |
| -0.0131 | 0.0018 | 3.57E-13 | 3,014,960 | secondary | N/A        |
| -0.0154 | 0.0012 | 7.11E-41 | 3,037,390 | primary   | rs61899382 |
| -0.0130 | 0.0016 | 1.80E-15 | 3,037,460 | primary   | -          |
| -0.0109 | 0.0011 | 1.65E-24 | 3,033,290 | primary   | -          |
| 0.0097  | 0.0012 | 1.40E-16 | 3,037,460 | primary   | -          |
| 0.0067  | 0.0011 | 5.87E-10 | 3,016,190 | primary   | -          |
| -0.0123 | 0.0011 | 2.99E-31 | 3,035,720 | primary   | -          |
| 0.0093  | 0.0012 | 4.62E-15 | 3,037,450 | primary   | -          |
| 0.0070  | 0.0011 | 3.81E-11 | 3,037,490 | primary   | -          |
| 0.0075  | 0.0011 | 3.05E-12 | 3,030,380 | primary   | -          |
| 0.0095  | 0.0011 | 4.35E-19 | 3,023,170 | primary   | -          |
| -0.0081 | 0.0012 | 8.99E-11 | 3,037,470 | primary   | -          |
| -0.0063 | 0.0011 | 1.09E-08 | 3,019,920 | primary   | -          |
| 0.0141  | 0.0022 | 8.67E-11 | 3,019,880 | primary   | -          |
| -0.0077 | 0.0011 | 1.69E-12 | 3,037,460 | primary   | -          |

|         |        |          |           |         |   |
|---------|--------|----------|-----------|---------|---|
| -0.0100 | 0.0011 | 5.09E-21 | 3,037,440 | primary | - |
| 0.0065  | 0.0011 | 2.16E-09 | 3,037,450 | primary | - |
| -0.0202 | 0.0033 | 8.91E-10 | 2,930,550 | primary | - |
| -0.0230 | 0.0040 | 1.06E-08 | 3,009,730 | primary | - |
| -0.0089 | 0.0012 | 4.80E-14 | 3,021,650 | primary | - |
| -0.0109 | 0.0011 | 2.16E-24 | 3,035,670 | primary | - |
| 0.0129  | 0.0011 | 4.51E-31 | 3,024,710 | primary | - |
| 0.0069  | 0.0012 | 1.38E-08 | 3,035,760 | primary | - |
| 0.0065  | 0.0011 | 6.61E-10 | 3,037,460 | primary | - |
| 0.0073  | 0.0011 | 8.13E-11 | 3,037,450 | primary | - |
| -0.0073 | 0.0011 | 5.26E-12 | 3,024,350 | primary | - |
| -0.0132 | 0.0021 | 4.84E-10 | 2,999,180 | primary | - |
| 0.0091  | 0.0014 | 1.97E-11 | 3,027,040 | primary | - |
| -0.0064 | 0.0011 | 1.82E-09 | 3,035,230 | primary | - |
| 0.0088  | 0.0012 | 1.68E-13 | 3,035,040 | primary | - |
| 0.0077  | 0.0012 | 2.01E-11 | 3,036,930 | primary | - |
| -0.0063 | 0.0011 | 7.64E-09 | 3,033,110 | primary | - |
| -0.0086 | 0.0011 | 2.75E-15 | 3,037,450 | primary | - |
| 0.0094  | 0.0011 | 4.07E-18 | 3,035,760 | primary | - |
| -0.0094 | 0.0013 | 3.47E-13 | 3,035,030 | primary | - |
| 0.0069  | 0.0011 | 6.70E-11 | 3,024,380 | primary | - |
| 0.0081  | 0.0011 | 7.48E-14 | 3,023,240 | primary | - |
| 0.0109  | 0.0011 | 8.36E-23 | 3,037,470 | primary | - |
| -0.0073 | 0.0011 | 3.88E-11 | 3,037,490 | primary | - |
| -0.0075 | 0.0012 | 2.27E-10 | 3,037,460 | primary | - |
| 0.0072  | 0.0011 | 2.70E-11 | 3,035,720 | primary | - |
| 0.0096  | 0.0012 | 8.39E-15 | 3,037,460 | primary | - |
| -0.0166 | 0.0014 | 2.86E-33 | 3,014,400 | primary | - |
| 0.0085  | 0.0011 | 3.83E-14 | 3,036,940 | primary | - |
| 0.0117  | 0.0015 | 6.25E-15 | 3,036,630 | primary | - |
| 0.0117  | 0.0011 | 1.38E-28 | 3,031,590 | primary | - |
| 0.0082  | 0.0013 | 5.88E-10 | 3,020,760 | primary | - |
| 0.0119  | 0.0016 | 2.80E-14 | 3,037,430 | primary | - |
| 0.0178  | 0.0024 | 1.65E-13 | 3,035,840 | primary | - |
| -0.0071 | 0.0012 | 1.01E-08 | 3,028,390 | primary | - |
| 0.0081  | 0.0014 | 3.12E-09 | 3,025,460 | primary | - |
| -0.0148 | 0.0025 | 4.66E-09 | 2,998,440 | primary | - |
| -0.0066 | 0.0011 | 1.20E-09 | 3,023,200 | primary | - |
| 0.0068  | 0.0011 | 1.46E-10 | 3,020,790 | primary | - |
| -0.0107 | 0.0017 | 6.20E-10 | 3,029,770 | primary | - |
| 0.0062  | 0.0011 | 3.38E-08 | 3,035,790 | primary | - |
| 0.0158  | 0.0028 | 1.01E-08 | 2,984,960 | primary | - |
| -0.0094 | 0.0014 | 4.88E-12 | 3,037,480 | primary | - |
| -0.0177 | 0.0020 | 1.67E-19 | 3,035,720 | primary | - |
| -0.0088 | 0.0011 | 5.63E-17 | 3,033,310 | primary | - |
| 0.0162  | 0.0017 | 1.60E-21 | 3,037,430 | primary | - |
| -0.0066 | 0.0011 | 5.74E-10 | 3,037,110 | primary | - |
| 0.0089  | 0.0014 | 5.02E-11 | 3,034,070 | primary | - |

|         |        |          |           |           |            |
|---------|--------|----------|-----------|-----------|------------|
| 0.0078  | 0.0011 | 4.65E-13 | 3,037,460 | primary   | -          |
| -0.0069 | 0.0011 | 6.88E-11 | 3,034,190 | primary   | -          |
| 0.0120  | 0.0011 | 5.60E-30 | 3,037,400 | primary   | -          |
| -0.0099 | 0.0011 | 7.56E-19 | 3,035,700 | primary   | -          |
| -0.0078 | 0.0012 | 5.55E-10 | 3,036,940 | primary   | -          |
| -0.0114 | 0.0011 | 4.73E-27 | 3,037,380 | primary   | -          |
| -0.0072 | 0.0011 | 2.73E-11 | 3,020,800 | primary   | -          |
| 0.0061  | 0.0011 | 1.51E-08 | 3,037,520 | primary   | -          |
| -0.0101 | 0.0014 | 4.76E-13 | 3,037,450 | primary   | -          |
| -0.0076 | 0.0011 | 6.02E-12 | 3,037,500 | primary   | -          |
| 0.0204  | 0.0032 | 1.45E-10 | 2,812,030 | primary   | -          |
| 0.0059  | 0.0011 | 2.26E-08 | 3,021,500 | primary   | -          |
| 0.0108  | 0.0011 | 1.01E-23 | 3,037,420 | primary   | -          |
| -0.0171 | 0.0018 | 8.61E-21 | 3,000,830 | primary   | rs10770968 |
| 0.0114  | 0.0018 | 3.13E-10 | 3,037,490 | secondary | N/A        |
| -0.0115 | 0.0015 | 7.08E-14 | 3,007,730 | primary   | -          |
| 0.0079  | 0.0012 | 1.39E-10 | 3,034,210 | primary   | -          |
| -0.0196 | 0.0027 | 1.81E-13 | 3,036,530 | primary   | -          |
| 0.0108  | 0.0018 | 1.62E-09 | 3,035,010 | primary   | -          |
| -0.0081 | 0.0012 | 3.46E-11 | 3,000,830 | primary   | -          |
| -0.0114 | 0.0011 | 2.06E-25 | 3,037,400 | primary   | -          |
| 0.0112  | 0.0013 | 1.87E-17 | 3,037,440 | primary   | -          |
| -0.0094 | 0.0013 | 2.68E-13 | 3,037,450 | primary   | -          |
| 0.0243  | 0.0042 | 4.65E-09 | 2,912,640 | primary   | -          |
| -0.0080 | 0.0014 | 2.43E-08 | 3,037,500 | primary   | -          |
| -0.0102 | 0.0013 | 2.33E-15 | 3,037,440 | primary   | -          |
| 0.0070  | 0.0011 | 4.68E-11 | 3,037,490 | primary   | -          |
| -0.0082 | 0.0011 | 8.07E-15 | 3,037,430 | primary   | -          |
| 0.0099  | 0.0011 | 7.65E-20 | 3,035,740 | primary   | -          |
| 0.0483  | 0.0085 | 1.46E-08 | 2,713,320 | primary   | -          |
| 0.0135  | 0.0011 | 1.23E-33 | 3,035,410 | primary   | -          |
| -0.0259 | 0.0030 | 1.28E-17 | 2,988,230 | primary   | -          |
| -0.0127 | 0.0014 | 3.00E-20 | 3,024,880 | primary   | -          |
| -0.0067 | 0.0011 | 1.87E-09 | 3,035,770 | primary   | -          |
| -0.0121 | 0.0014 | 6.82E-18 | 3,024,910 | primary   | -          |
| 0.0108  | 0.0011 | 1.65E-23 | 3,034,170 | primary   | -          |
| 0.0083  | 0.0014 | 4.38E-09 | 3,005,060 | primary   | -          |
| -0.0096 | 0.0013 | 1.64E-13 | 3,016,490 | secondary | N/A        |
| 0.0127  | 0.0014 | 2.93E-20 | 3,037,230 | primary   | rs11611029 |
| 0.0095  | 0.0012 | 9.83E-15 | 2,579,110 | primary   | -          |
| -0.0093 | 0.0011 | 1.62E-16 | 3,035,720 | primary   | -          |
| -0.0082 | 0.0012 | 2.01E-11 | 3,035,540 | primary   | -          |
| 0.0059  | 0.0011 | 3.60E-08 | 3,037,490 | primary   | -          |
| -0.0129 | 0.0014 | 1.58E-20 | 3,037,420 | primary   | -          |
| 0.0093  | 0.0011 | 5.57E-16 | 3,023,210 | primary   | -          |
| -0.0064 | 0.0011 | 1.94E-08 | 3,023,210 | primary   | -          |
| -0.0067 | 0.0011 | 2.53E-10 | 3,024,010 | primary   | -          |
| 0.0065  | 0.0011 | 1.58E-09 | 3,037,470 | primary   | -          |

|         |        |          |           |           |             |
|---------|--------|----------|-----------|-----------|-------------|
| -0.0101 | 0.0016 | 8.56E-11 | 3,037,480 | primary   | -           |
| -0.0080 | 0.0011 | 1.44E-12 | 3,037,510 | primary   | -           |
| -0.0069 | 0.0011 | 2.57E-10 | 3,037,480 | primary   | -           |
| -0.0097 | 0.0016 | 4.48E-09 | 3,037,090 | primary   | -           |
| -0.0070 | 0.0011 | 3.69E-11 | 3,037,490 | primary   | -           |
| -0.0080 | 0.0011 | 7.22E-14 | 3,030,080 | primary   | -           |
| 0.0153  | 0.0015 | 6.95E-25 | 3,037,420 | primary   | -           |
| -0.0062 | 0.0011 | 5.53E-09 | 3,023,220 | primary   | -           |
| 0.0146  | 0.0011 | 4.12E-42 | 3,035,090 | primary   | -           |
| -0.0225 | 0.0034 | 2.74E-11 | 2,272,180 | primary   | -           |
| -0.0114 | 0.0020 | 1.96E-08 | 3,034,850 | primary   | -           |
| 0.0113  | 0.0011 | 1.29E-26 | 3,036,880 | primary   | -           |
| -0.0075 | 0.0011 | 1.72E-11 | 3,037,480 | primary   | -           |
| -0.0067 | 0.0011 | 3.68E-10 | 3,037,490 | primary   | -           |
| 0.0079  | 0.0012 | 1.00E-10 | 3,036,910 | primary   | -           |
| -0.0071 | 0.0012 | 1.28E-09 | 3,011,130 | primary   | -           |
| -0.0119 | 0.0021 | 1.14E-08 | 3,037,480 | primary   | -           |
| 0.0084  | 0.0011 | 1.33E-15 | 3,037,470 | primary   | -           |
| 0.0067  | 0.0012 | 1.47E-08 | 3,035,760 | primary   | -           |
| -0.0110 | 0.0015 | 1.11E-12 | 3,037,480 | primary   | -           |
| 0.0099  | 0.0014 | 3.31E-12 | 3,035,730 | primary   | -           |
| 0.0072  | 0.0011 | 2.27E-10 | 3,037,480 | primary   | -           |
| -0.0117 | 0.0018 | 2.06E-10 | 3,037,460 | primary   | -           |
| -0.0074 | 0.0012 | 4.44E-10 | 3,037,460 | primary   | -           |
| -0.0105 | 0.0013 | 1.93E-15 | 3,037,440 | primary   | -           |
| -0.0080 | 0.0013 | 1.84E-10 | 3,037,460 | primary   | -           |
| -0.0260 | 0.0036 | 3.41E-13 | 3,018,240 | primary   | -           |
| 0.0116  | 0.0014 | 3.48E-16 | 3,035,830 | primary   | -           |
| 0.0067  | 0.0011 | 8.59E-10 | 3,037,450 | primary   | -           |
| 0.0062  | 0.0011 | 1.30E-08 | 3,035,750 | primary   | -           |
| -0.0096 | 0.0014 | 3.10E-12 | 3,037,450 | primary   | -           |
| 0.0120  | 0.0012 | 8.84E-22 | 3,037,400 | primary   | -           |
| 0.0121  | 0.0015 | 1.37E-16 | 2,272,160 | primary   | -           |
| -0.0078 | 0.0011 | 1.38E-12 | 3,037,440 | primary   | -           |
| -0.0083 | 0.0011 | 3.54E-15 | 3,037,480 | primary   | -           |
| -0.0077 | 0.0011 | 2.34E-13 | 3,037,440 | primary   | -           |
| -0.0101 | 0.0012 | 1.66E-17 | 2,962,170 | primary   | -           |
| 0.0135  | 0.0019 | 2.39E-12 | 3,012,120 | primary   | -           |
| -0.0130 | 0.0018 | 8.76E-13 | 3,036,570 | primary   | -           |
| 0.0117  | 0.0015 | 2.53E-15 | 3,029,430 | primary   | -           |
| 0.0106  | 0.0018 | 4.84E-09 | 3,024,930 | primary   | -           |
| 0.0074  | 0.0012 | 2.02E-09 | 3,035,740 | primary   | -           |
| -0.0073 | 0.0012 | 6.69E-10 | 3,035,770 | primary   | -           |
| 0.0080  | 0.0011 | 1.08E-12 | 3,037,440 | primary   | -           |
| -0.0183 | 0.0026 | 2.29E-12 | 3,030,510 | secondary | N/A         |
| 0.0145  | 0.0014 | 2.82E-24 | 3,028,680 | primary   | rs149308817 |
| -0.0067 | 0.0011 | 5.83E-10 | 3,037,440 | primary   | -           |
| -0.0119 | 0.0011 | 6.61E-28 | 3,037,430 | primary   | -           |

|         |        |          |           |           |            |
|---------|--------|----------|-----------|-----------|------------|
| -0.0077 | 0.0011 | 1.02E-12 | 3,028,500 | primary   | -          |
| 0.0190  | 0.0029 | 2.44E-11 | 2,272,180 | primary   | -          |
| -0.0152 | 0.0027 | 1.30E-08 | 3,033,760 | primary   | -          |
| -0.0126 | 0.0012 | 2.42E-26 | 3,037,420 | primary   | -          |
| 0.0192  | 0.0013 | 5.91E-49 | 3,034,880 | primary   | -          |
| -0.0133 | 0.0016 | 3.90E-16 | 2,981,320 | primary   | rs12426133 |
| -0.0086 | 0.0014 | 3.82E-10 | 3,034,600 | secondary | N/A        |
| 0.0077  | 0.0012 | 7.54E-11 | 3,037,500 | primary   | -          |
| 0.0073  | 0.0012 | 2.50E-10 | 3,026,710 | primary   | -          |
| -0.0068 | 0.0011 | 1.01E-10 | 3,022,990 | primary   | -          |
| -0.0083 | 0.0011 | 2.48E-15 | 3,037,450 | primary   | -          |
| -0.0085 | 0.0011 | 1.07E-15 | 3,034,920 | primary   | -          |
| -0.0090 | 0.0014 | 3.99E-11 | 2,977,710 | primary   | -          |
| -0.0084 | 0.0012 | 3.86E-13 | 3,037,470 | primary   | -          |
| 0.0089  | 0.0014 | 4.07E-10 | 3,037,480 | primary   | -          |
| 0.0104  | 0.0018 | 1.26E-08 | 3,037,480 | primary   | -          |
| -0.0083 | 0.0011 | 2.98E-15 | 3,034,500 | primary   | -          |
| 0.0088  | 0.0011 | 8.92E-17 | 3,037,450 | primary   | -          |
| -0.0065 | 0.0012 | 3.86E-08 | 3,035,760 | primary   | -          |
| -0.0123 | 0.0013 | 8.02E-21 | 3,037,390 | primary   | -          |
| -0.0073 | 0.0011 | 3.39E-11 | 3,019,140 | primary   | -          |
| 0.0069  | 0.0011 | 5.44E-10 | 3,036,660 | primary   | -          |
| -0.0077 | 0.0012 | 1.50E-10 | 3,036,660 | primary   | -          |
| 0.0113  | 0.0015 | 2.35E-13 | 3,036,670 | primary   | -          |
| 0.0075  | 0.0011 | 2.19E-12 | 3,034,980 | primary   | -          |
| -0.0145 | 0.0016 | 8.50E-20 | 3,036,630 | primary   | -          |
| 0.0080  | 0.0011 | 6.31E-14 | 3,036,660 | primary   | -          |
| 0.0071  | 0.0011 | 1.81E-11 | 3,034,420 | primary   | -          |
| 0.0061  | 0.0011 | 4.81E-08 | 3,034,980 | primary   | -          |
| 0.0115  | 0.0021 | 2.94E-08 | 2,999,300 | primary   | -          |
| 0.0077  | 0.0010 | 2.36E-13 | 3,036,630 | primary   | -          |
| 0.0113  | 0.0018 | 2.17E-10 | 3,034,410 | primary   | -          |
| -0.0061 | 0.0011 | 1.78E-08 | 3,036,660 | primary   | -          |
| 0.0090  | 0.0011 | 2.20E-15 | 3,036,640 | primary   | -          |
| -0.0067 | 0.0011 | 6.20E-10 | 3,036,660 | primary   | -          |
| 0.0117  | 0.0016 | 2.99E-13 | 3,036,630 | primary   | -          |
| -0.0104 | 0.0012 | 3.19E-18 | 3,036,660 | primary   | -          |
| -0.0077 | 0.0011 | 4.36E-12 | 3,036,620 | primary   | -          |
| -0.0073 | 0.0012 | 1.43E-09 | 3,036,660 | primary   | -          |
| 0.0249  | 0.0012 | 1.89E-95 | 3,036,290 | primary   | -          |
| -0.0065 | 0.0011 | 1.37E-09 | 3,036,130 | primary   | -          |
| 0.0078  | 0.0011 | 3.18E-12 | 3,036,680 | primary   | -          |
| 0.0087  | 0.0013 | 1.72E-11 | 3,029,570 | primary   | rs7997690  |
| 0.0065  | 0.0012 | 2.42E-08 | 3,036,660 | secondary | N/A        |
| 0.0098  | 0.0013 | 1.30E-13 | 3,036,650 | primary   | -          |
| 0.0109  | 0.0012 | 2.50E-21 | 3,036,640 | primary   | -          |
| -0.0073 | 0.0011 | 9.16E-12 | 3,032,540 | primary   | -          |
| 0.0325  | 0.0055 | 2.58E-09 | 2,860,840 | primary   | -          |

|         |        |          |           |           |         |
|---------|--------|----------|-----------|-----------|---------|
| 0.0085  | 0.0014 | 4.83E-10 | 3,036,660 | primary   | -       |
| 0.0100  | 0.0011 | 6.27E-21 | 3,036,610 | primary   | -       |
| -0.0098 | 0.0015 | 4.73E-11 | 3,036,610 | primary   | -       |
| 0.0065  | 0.0011 | 1.26E-09 | 3,036,150 | primary   | -       |
| -0.0078 | 0.0011 | 5.44E-13 | 3,036,640 | primary   | -       |
| -0.0086 | 0.0013 | 1.01E-11 | 3,036,660 | primary   | -       |
| 0.0098  | 0.0011 | 5.51E-20 | 3,034,340 | primary   | -       |
| -0.0089 | 0.0011 | 5.81E-17 | 3,036,090 | primary   | -       |
| -0.0065 | 0.0011 | 5.65E-10 | 3,036,660 | primary   | -       |
| -0.0061 | 0.0011 | 2.35E-08 | 3,036,670 | primary   | -       |
| -0.0086 | 0.0013 | 1.13E-10 | 2,997,600 | primary   | -       |
| -0.0079 | 0.0011 | 9.79E-14 | 3,034,960 | primary   | -       |
| 0.0065  | 0.0011 | 2.72E-09 | 3,034,940 | primary   | -       |
| 0.0084  | 0.0014 | 6.96E-10 | 3,036,650 | primary   | -       |
| -0.0101 | 0.0011 | 1.84E-20 | 3,036,610 | primary   | -       |
| 0.0083  | 0.0013 | 2.69E-10 | 3,034,980 | primary   | -       |
| -0.0122 | 0.0014 | 2.59E-17 | 3,036,630 | primary   | -       |
| 0.0071  | 0.0012 | 5.64E-10 | 3,036,150 | primary   | -       |
| -0.0062 | 0.0011 | 6.12E-09 | 3,036,170 | primary   | -       |
| 0.0107  | 0.0013 | 3.02E-16 | 3,036,660 | primary   | -       |
| 0.0092  | 0.0012 | 1.13E-15 | 3,036,640 | primary   | -       |
| 0.0113  | 0.0018 | 2.29E-10 | 3,022,370 | primary   | -       |
| 0.0092  | 0.0013 | 3.08E-13 | 3,034,910 | primary   | -       |
| -0.0077 | 0.0011 | 8.36E-12 | 3,036,670 | primary   | -       |
| 0.0065  | 0.0011 | 7.63E-09 | 3,036,680 | primary   | -       |
| 0.0088  | 0.0015 | 6.70E-09 | 3,036,660 | primary   | -       |
| -0.0064 | 0.0011 | 8.94E-09 | 3,034,300 | primary   | -       |
| 0.0096  | 0.0017 | 1.05E-08 | 3,036,670 | primary   | -       |
| -0.0153 | 0.0019 | 1.58E-15 | 3,036,640 | primary   | -       |
| 0.0177  | 0.0022 | 7.47E-16 | 3,029,580 | primary   | -       |
| -0.0136 | 0.0025 | 3.80E-08 | 3,034,170 | primary   | -       |
| 0.0076  | 0.0011 | 7.94E-13 | 3,036,660 | primary   | -       |
| -0.0100 | 0.0015 | 9.41E-12 | 3,036,660 | primary   | -       |
| -0.0080 | 0.0012 | 1.08E-11 | 2,713,290 | primary   | -       |
| 0.0089  | 0.0012 | 1.20E-13 | 3,036,560 | secondary | N/A     |
| 0.0092  | 0.0012 | 1.88E-14 | 3,034,850 | primary   | rs12261 |
| 0.0089  | 0.0011 | 1.02E-16 | 3,036,080 | primary   | -       |
| -0.0071 | 0.0012 | 6.26E-09 | 3,024,110 | primary   | -       |
| 0.0061  | 0.0011 | 8.01E-09 | 3,036,700 | primary   | -       |
| 0.0081  | 0.0012 | 3.81E-12 | 3,036,670 | primary   | -       |
| 0.0233  | 0.0031 | 2.64E-14 | 3,027,090 | primary   | -       |
| -0.0068 | 0.0011 | 3.24E-09 | 3,036,660 | primary   | -       |
| -0.0087 | 0.0015 | 2.58E-09 | 3,034,240 | primary   | -       |
| -0.0092 | 0.0011 | 8.01E-16 | 3,034,410 | primary   | -       |
| -0.0122 | 0.0018 | 2.57E-11 | 3,019,150 | primary   | -       |
| 0.0065  | 0.0010 | 6.53E-10 | 3,034,410 | primary   | -       |
| 0.0115  | 0.0014 | 3.24E-16 | 3,036,660 | primary   | -       |
| 0.0064  | 0.0011 | 3.96E-09 | 3,010,970 | primary   | -       |

|         |        |          |           |           |            |
|---------|--------|----------|-----------|-----------|------------|
| 0.0067  | 0.0011 | 2.14E-10 | 3,034,100 | primary   | -          |
| 0.0072  | 0.0012 | 6.32E-09 | 3,036,670 | primary   | -          |
| -0.0131 | 0.0013 | 1.09E-22 | 3,037,430 | primary   | -          |
| -0.0117 | 0.0011 | 2.10E-27 | 3,037,410 | primary   | -          |
| -0.0079 | 0.0013 | 4.25E-10 | 3,027,470 | primary   | -          |
| -0.0123 | 0.0015 | 2.16E-15 | 3,010,700 | primary   | -          |
| 0.0071  | 0.0011 | 1.19E-10 | 3,033,280 | primary   | -          |
| 0.0075  | 0.0011 | 1.76E-12 | 3,016,600 | primary   | -          |
| 0.0156  | 0.0012 | 1.34E-36 | 3,037,360 | primary   | -          |
| 0.0090  | 0.0013 | 7.69E-12 | 3,037,450 | primary   | -          |
| 0.0447  | 0.0065 | 6.04E-12 | 2,909,290 | primary   | -          |
| 0.0169  | 0.0014 | 4.25E-35 | 3,037,270 | primary   | -          |
| -0.0099 | 0.0017 | 3.65E-09 | 3,037,370 | secondary | N/A        |
| -0.0147 | 0.0020 | 1.04E-13 | 2,972,770 | primary   | rs72671456 |
| 0.0083  | 0.0011 | 1.87E-13 | 3,036,670 | primary   | -          |
| 0.0106  | 0.0011 | 2.87E-22 | 3,000,810 | primary   | -          |
| -0.0090 | 0.0012 | 4.06E-15 | 3,035,710 | primary   | -          |
| 0.0099  | 0.0012 | 7.92E-18 | 3,033,250 | primary   | -          |
| -0.0098 | 0.0016 | 1.02E-09 | 3,020,810 | primary   | -          |
| -0.0092 | 0.0015 | 3.23E-10 | 3,035,060 | primary   | -          |
| -0.0078 | 0.0012 | 2.30E-11 | 3,037,470 | primary   | -          |
| -0.0125 | 0.0011 | 1.97E-32 | 3,031,500 | primary   | -          |
| -0.0067 | 0.0012 | 2.29E-08 | 3,034,210 | primary   | -          |
| 0.0087  | 0.0011 | 3.59E-16 | 3,037,440 | primary   | -          |
| -0.0066 | 0.0011 | 1.39E-09 | 3,033,930 | primary   | -          |
| 0.0230  | 0.0026 | 4.98E-19 | 3,003,330 | primary   | -          |
| 0.0079  | 0.0014 | 7.82E-09 | 3,037,450 | primary   | -          |
| 0.0113  | 0.0013 | 2.40E-19 | 3,037,420 | primary   | -          |
| -0.0104 | 0.0011 | 7.29E-23 | 3,036,870 | primary   | -          |
| -0.0064 | 0.0011 | 1.73E-09 | 3,037,490 | primary   | -          |
| 0.0106  | 0.0017 | 7.25E-10 | 3,037,460 | primary   | -          |
| -0.0125 | 0.0018 | 3.47E-12 | 3,030,920 | primary   | -          |
| 0.0061  | 0.0011 | 3.64E-08 | 3,037,480 | primary   | -          |
| 0.0063  | 0.0011 | 2.97E-09 | 3,037,440 | primary   | -          |
| 0.0176  | 0.0020 | 1.39E-18 | 3,037,400 | primary   | -          |
| 0.0188  | 0.0026 | 1.16E-12 | 3,036,910 | primary   | -          |
| 0.0194  | 0.0024 | 7.78E-16 | 3,025,200 | primary   | -          |
| 0.0064  | 0.0011 | 9.68E-10 | 3,032,470 | primary   | -          |
| 0.0088  | 0.0011 | 1.02E-16 | 3,031,530 | primary   | -          |
| -0.0079 | 0.0011 | 3.21E-12 | 3,037,450 | primary   | -          |
| -0.0120 | 0.0019 | 3.17E-10 | 3,037,480 | primary   | -          |
| -0.0098 | 0.0011 | 1.97E-17 | 3,037,430 | primary   | -          |
| -0.0068 | 0.0011 | 6.59E-10 | 3,035,740 | primary   | -          |
| -0.0094 | 0.0012 | 9.48E-16 | 3,037,410 | primary   | -          |
| -0.0066 | 0.0012 | 1.41E-08 | 3,037,460 | primary   | -          |
| 0.0182  | 0.0026 | 6.27E-12 | 3,037,150 | primary   | -          |
| 0.0129  | 0.0022 | 2.67E-09 | 3,037,470 | primary   | -          |
| -0.0073 | 0.0012 | 5.50E-10 | 3,037,410 | secondary | N/A        |

|         |        |          |           |           |           |
|---------|--------|----------|-----------|-----------|-----------|
| 0.0106  | 0.0012 | 9.55E-19 | 3,035,650 | primary   | rs7140680 |
| -0.0067 | 0.0012 | 1.78E-08 | 3,024,430 | primary   | -         |
| 0.0110  | 0.0018 | 1.34E-09 | 3,037,460 | primary   | -         |
| 0.0071  | 0.0011 | 6.12E-11 | 3,037,450 | primary   | -         |
| -0.0099 | 0.0012 | 3.11E-16 | 3,037,450 | primary   | -         |
| -0.0102 | 0.0018 | 1.64E-08 | 3,000,850 | primary   | -         |
| 0.0085  | 0.0014 | 5.77E-10 | 3,037,450 | primary   | -         |
| 0.0075  | 0.0012 | 6.81E-11 | 3,037,460 | primary   | -         |
| -0.0085 | 0.0012 | 7.87E-13 | 3,037,440 | primary   | -         |
| -0.0096 | 0.0011 | 1.85E-17 | 3,037,420 | primary   | -         |
| 0.0079  | 0.0011 | 1.09E-13 | 3,037,420 | primary   | -         |
| -0.0213 | 0.0031 | 6.54E-12 | 2,989,290 | primary   | -         |
| -0.0105 | 0.0011 | 3.13E-21 | 3,019,900 | primary   | -         |
| -0.0066 | 0.0011 | 1.27E-09 | 3,035,790 | primary   | -         |
| 0.0093  | 0.0015 | 1.33E-09 | 3,037,480 | primary   | -         |
| 0.0074  | 0.0011 | 3.28E-12 | 3,035,750 | primary   | -         |
| 0.0089  | 0.0011 | 4.81E-17 | 3,035,770 | primary   | -         |
| 0.0060  | 0.0011 | 1.28E-08 | 3,035,200 | primary   | -         |
| 0.0078  | 0.0011 | 3.79E-13 | 3,035,730 | primary   | -         |
| -0.0097 | 0.0013 | 2.42E-13 | 3,037,400 | primary   | -         |
| 0.0099  | 0.0013 | 7.79E-15 | 3,037,430 | primary   | -         |
| 0.0070  | 0.0012 | 3.66E-09 | 3,037,450 | primary   | -         |
| -0.0097 | 0.0011 | 2.30E-19 | 3,015,870 | primary   | -         |
| 0.0071  | 0.0011 | 2.96E-11 | 3,037,490 | primary   | -         |
| -0.0076 | 0.0011 | 6.25E-13 | 3,037,430 | primary   | -         |
| -0.0075 | 0.0011 | 7.19E-13 | 3,037,480 | primary   | -         |
| 0.0094  | 0.0012 | 2.61E-14 | 2,998,380 | primary   | -         |
| -0.0059 | 0.0011 | 1.91E-08 | 3,035,750 | primary   | -         |
| 0.0064  | 0.0011 | 1.36E-09 | 3,029,480 | primary   | -         |
| -0.0085 | 0.0011 | 5.83E-15 | 3,036,890 | primary   | -         |
| 0.0065  | 0.0011 | 7.92E-10 | 3,035,030 | primary   | -         |
| -0.0160 | 0.0018 | 9.87E-19 | 3,037,420 | primary   | -         |
| 0.0096  | 0.0013 | 8.62E-14 | 3,034,980 | primary   | -         |
| -0.0082 | 0.0014 | 1.50E-09 | 3,035,750 | primary   | -         |
| 0.0081  | 0.0014 | 5.55E-09 | 3,035,780 | primary   | -         |
| -0.0101 | 0.0011 | 2.64E-21 | 3,029,950 | primary   | -         |
| -0.0094 | 0.0011 | 2.36E-16 | 3,037,460 | primary   | rs1957514 |
| 0.0069  | 0.0011 | 7.94E-10 | 3,013,700 | secondary | N/A       |
| 0.0061  | 0.0011 | 9.96E-09 | 3,030,560 | primary   | -         |
| -0.0075 | 0.0013 | 2.64E-09 | 3,012,350 | primary   | -         |
| -0.0075 | 0.0011 | 1.02E-12 | 3,009,450 | primary   | -         |
| -0.0069 | 0.0012 | 3.28E-09 | 3,028,640 | primary   | -         |
| -0.0086 | 0.0012 | 8.03E-13 | 3,012,960 | primary   | -         |
| 0.0084  | 0.0014 | 1.95E-09 | 3,035,030 | primary   | -         |
| -0.0171 | 0.0031 | 2.37E-08 | 2,982,140 | primary   | -         |
| -0.0075 | 0.0012 | 1.11E-09 | 3,030,050 | primary   | -         |
| -0.0073 | 0.0013 | 9.75E-09 | 3,024,340 | primary   | -         |
| -0.0080 | 0.0011 | 2.20E-14 | 3,037,450 | primary   | -         |



|         |        |          |           |           |                    |
|---------|--------|----------|-----------|-----------|--------------------|
| 0.0084  | 0.0011 | 9.99E-16 | 3,037,450 | primary   | -                  |
| 0.0094  | 0.0011 | 6.08E-19 | 3,037,470 | primary   | -                  |
| -0.0130 | 0.0023 | 2.60E-08 | 2,955,410 | primary   | -                  |
| -0.0081 | 0.0011 | 9.48E-14 | 2,962,460 | primary   | -                  |
| 0.0080  | 0.0011 | 3.76E-14 | 3,036,920 | primary   | -                  |
| -0.0080 | 0.0012 | 9.32E-11 | 3,037,490 | primary   | -                  |
| -0.0079 | 0.0014 | 5.85E-09 | 3,033,130 | primary   | -                  |
| 0.0101  | 0.0012 | 4.77E-18 | 3,034,360 | primary   | -                  |
| -0.0116 | 0.0013 | 2.65E-18 | 3,034,210 | primary   | -                  |
| -0.0079 | 0.0014 | 3.19E-08 | 3,020,720 | primary   | -                  |
| -0.0100 | 0.0015 | 4.55E-12 | 3,036,650 | primary   | -                  |
| 0.0092  | 0.0015 | 4.40E-10 | 3,036,630 | primary   | -                  |
| -0.0075 | 0.0013 | 3.32E-09 | 3,036,640 | primary   | -                  |
| 0.0065  | 0.0012 | 1.93E-08 | 2,991,970 | primary   | -                  |
| -0.0087 | 0.0012 | 7.85E-14 | 3,036,640 | secondary | N/A                |
| -0.0084 | 0.0014 | 1.92E-09 | 3,036,670 | secondary | N/A                |
| 0.0155  | 0.0017 | 6.58E-21 | 3,036,580 | primary   | rs2860049,rs489692 |
| 0.0083  | 0.0011 | 1.98E-14 | 3,036,640 | primary   | -                  |
| 0.0279  | 0.0049 | 1.18E-08 | 2,928,920 | primary   | -                  |
| 0.0130  | 0.0017 | 1.78E-14 | 3,034,950 | primary   | -                  |
| -0.0086 | 0.0012 | 1.21E-12 | 3,036,640 | primary   | -                  |
| 0.0064  | 0.0010 | 1.25E-09 | 3,036,670 | primary   | -                  |
| -0.0069 | 0.0011 | 2.06E-10 | 3,034,970 | primary   | -                  |
| -0.0092 | 0.0011 | 3.17E-18 | 3,034,350 | primary   | -                  |
| 0.0199  | 0.0030 | 5.81E-11 | 3,035,400 | primary   | -                  |
| 0.0090  | 0.0011 | 6.92E-17 | 3,036,580 | primary   | -                  |
| 0.0123  | 0.0020 | 8.40E-10 | 3,024,120 | primary   | -                  |
| -0.0080 | 0.0010 | 2.16E-14 | 3,034,910 | primary   | -                  |
| -0.0939 | 0.0153 | 8.49E-10 | 2,748,430 | primary   | -                  |
| 0.0169  | 0.0014 | 2.38E-35 | 3,018,340 | primary   | -                  |
| -0.0157 | 0.0020 | 1.59E-15 | 3,036,630 | primary   | -                  |
| 0.0103  | 0.0015 | 2.32E-12 | 3,036,680 | primary   | -                  |
| 0.0094  | 0.0011 | 1.39E-18 | 3,012,090 | primary   | -                  |
| -0.0089 | 0.0012 | 7.49E-14 | 3,036,680 | primary   | -                  |
| -0.0109 | 0.0014 | 5.91E-15 | 3,026,210 | primary   | -                  |
| 0.0239  | 0.0041 | 8.16E-09 | 2,897,470 | primary   | -                  |
| 0.0105  | 0.0011 | 7.66E-21 | 2,999,430 | primary   | -                  |
| -0.0262 | 0.0037 | 2.02E-12 | 3,033,220 | primary   | -                  |
| -0.0076 | 0.0011 | 1.22E-11 | 3,036,690 | primary   | -                  |
| 0.0146  | 0.0016 | 3.41E-20 | 3,036,640 | primary   | -                  |
| -0.0102 | 0.0017 | 5.73E-09 | 3,036,660 | primary   | -                  |
| 0.0074  | 0.0011 | 7.18E-11 | 3,036,650 | primary   | -                  |
| -0.0090 | 0.0012 | 5.26E-14 | 2,993,030 | primary   | -                  |
| 0.0118  | 0.0011 | 8.91E-29 | 3,032,330 | primary   | -                  |
| 0.0065  | 0.0011 | 1.42E-09 | 3,036,670 | primary   | -                  |
| -0.0090 | 0.0011 | 4.13E-16 | 3,036,670 | primary   | -                  |
| 0.0061  | 0.0011 | 6.16E-09 | 3,033,000 | primary   | -                  |
| -0.0066 | 0.0011 | 3.45E-10 | 3,034,690 | primary   | -                  |

|         |        |          |           |           |           |
|---------|--------|----------|-----------|-----------|-----------|
| -0.0081 | 0.0011 | 4.16E-13 | 3,034,700 | primary   | -         |
| 0.0077  | 0.0014 | 2.10E-08 | 3,033,010 | primary   | -         |
| -0.0072 | 0.0011 | 1.26E-11 | 2,997,560 | primary   | -         |
| -0.0086 | 0.0011 | 1.15E-15 | 3,032,960 | primary   | -         |
| -0.0106 | 0.0018 | 2.45E-09 | 3,033,830 | primary   | -         |
| 0.0066  | 0.0011 | 2.88E-10 | 3,033,020 | primary   | -         |
| 0.0121  | 0.0021 | 6.29E-09 | 3,034,360 | primary   | -         |
| 0.0141  | 0.0015 | 2.85E-22 | 3,034,700 | primary   | -         |
| 0.0076  | 0.0011 | 2.49E-11 | 3,034,710 | primary   | -         |
| -0.0114 | 0.0017 | 1.58E-11 | 3,033,020 | primary   | -         |
| 0.0066  | 0.0011 | 4.71E-10 | 3,034,730 | primary   | -         |
| 0.0115  | 0.0013 | 2.21E-18 | 2,993,260 | primary   | -         |
| -0.0071 | 0.0011 | 4.06E-10 | 3,032,310 | primary   | -         |
| 0.0066  | 0.0011 | 5.13E-10 | 3,027,310 | primary   | -         |
| -0.0205 | 0.0026 | 3.53E-15 | 2,970,500 | primary   | -         |
| 0.0067  | 0.0011 | 8.07E-10 | 3,016,520 | primary   | -         |
| -0.0066 | 0.0011 | 2.03E-09 | 3,032,810 | primary   | -         |
| 0.0081  | 0.0012 | 1.61E-11 | 3,032,240 | primary   | -         |
| 0.0199  | 0.0013 | 7.91E-56 | 3,015,110 | primary   | -         |
| -0.0084 | 0.0013 | 2.19E-11 | 3,018,560 | primary   | -         |
| 0.0072  | 0.0012 | 2.33E-09 | 3,008,010 | primary   | -         |
| 0.0112  | 0.0018 | 3.61E-10 | 2,913,960 | primary   | -         |
| 0.0095  | 0.0017 | 1.11E-08 | 3,020,250 | primary   | -         |
| 0.0095  | 0.0016 | 1.41E-09 | 3,021,330 | primary   | -         |
| 0.0105  | 0.0017 | 1.44E-09 | 2,976,890 | primary   | -         |
| 0.0075  | 0.0013 | 1.13E-08 | 3,021,620 | primary   | -         |
| 0.0102  | 0.0014 | 6.43E-14 | 3,037,420 | primary   | -         |
| 0.0101  | 0.0013 | 6.10E-16 | 3,035,760 | primary   | -         |
| -0.0110 | 0.0017 | 5.60E-11 | 3,037,470 | primary   | -         |
| -0.0064 | 0.0011 | 3.70E-09 | 3,023,200 | primary   | -         |
| -0.0110 | 0.0017 | 3.41E-11 | 3,020,790 | primary   | -         |
| -0.0103 | 0.0012 | 1.50E-18 | 3,035,710 | primary   | -         |
| -0.0087 | 0.0015 | 3.53E-09 | 3,000,300 | primary   | -         |
| 0.0061  | 0.0011 | 1.59E-08 | 3,035,010 | primary   | -         |
| 0.0070  | 0.0011 | 1.08E-09 | 3,020,790 | primary   | -         |
| -0.0067 | 0.0012 | 1.25E-08 | 3,037,480 | primary   | -         |
| 0.0066  | 0.0011 | 5.86E-09 | 3,035,750 | primary   | -         |
| -0.0063 | 0.0011 | 2.04E-09 | 3,035,760 | primary   | -         |
| 0.0083  | 0.0011 | 1.81E-14 | 3,037,430 | primary   | -         |
| 0.0069  | 0.0011 | 6.39E-11 | 3,019,170 | primary   | -         |
| 0.0087  | 0.0015 | 5.63E-09 | 3,034,170 | primary   | -         |
| -0.0067 | 0.0011 | 5.61E-10 | 3,023,210 | primary   | -         |
| -0.0083 | 0.0011 | 4.83E-15 | 3,035,730 | primary   | -         |
| 0.0113  | 0.0016 | 3.94E-12 | 3,037,460 | primary   | -         |
| 0.0122  | 0.0019 | 4.03E-11 | 3,037,450 | primary   | rs1097730 |
| -0.0068 | 0.0011 | 7.30E-10 | 3,037,420 | secondary | N/A       |
| -0.0151 | 0.0019 | 8.55E-16 | 3,020,240 | primary   | -         |
| 0.0118  | 0.0011 | 1.80E-28 | 3,037,410 | primary   | -         |

|         |        |          |           |         |   |
|---------|--------|----------|-----------|---------|---|
| -0.0102 | 0.0011 | 1.96E-21 | 3,037,460 | primary | - |
| -0.0108 | 0.0014 | 3.81E-14 | 3,035,750 | primary | - |
| 0.0079  | 0.0011 | 3.99E-12 | 3,037,460 | primary | - |
| 0.0073  | 0.0011 | 7.25E-12 | 3,037,450 | primary | - |
| 0.0111  | 0.0014 | 1.39E-15 | 3,022,510 | primary | - |
| 0.0092  | 0.0013 | 3.70E-13 | 3,035,070 | primary | - |
| -0.0110 | 0.0015 | 2.69E-13 | 3,001,070 | primary | - |
| -0.0077 | 0.0011 | 1.00E-11 | 3,037,450 | primary | - |
| 0.0117  | 0.0011 | 3.13E-28 | 3,015,620 | primary | - |
| -0.0134 | 0.0023 | 3.47E-09 | 3,037,110 | primary | - |
| -0.0078 | 0.0013 | 1.78E-09 | 3,020,820 | primary | - |
| 0.0112  | 0.0020 | 3.63E-08 | 3,037,490 | primary | - |
| 0.0116  | 0.0014 | 1.26E-16 | 3,026,050 | primary | - |
| 0.0067  | 0.0011 | 2.41E-10 | 3,031,270 | primary | - |
| -0.0083 | 0.0012 | 2.57E-12 | 3,036,920 | primary | - |
| -0.0166 | 0.0025 | 3.30E-11 | 2,959,850 | primary | - |
| -0.0320 | 0.0050 | 1.76E-10 | 2,986,670 | primary | - |
| 0.0133  | 0.0013 | 5.34E-23 | 3,036,620 | primary | - |
| -0.0089 | 0.0012 | 2.91E-13 | 3,030,840 | primary | - |
| 0.0093  | 0.0015 | 2.47E-10 | 3,019,680 | primary | - |
| 0.0067  | 0.0011 | 2.16E-10 | 3,032,490 | primary | - |
| -0.0085 | 0.0011 | 2.01E-15 | 3,036,670 | primary | - |
| 0.0083  | 0.0012 | 8.93E-13 | 3,034,920 | primary | - |
| -0.0143 | 0.0011 | 6.10E-39 | 3,036,540 | primary | - |
| -0.0099 | 0.0011 | 6.48E-20 | 3,032,510 | primary | - |
| -0.0116 | 0.0013 | 1.03E-18 | 3,036,650 | primary | - |
| 0.0088  | 0.0012 | 1.93E-13 | 3,036,660 | primary | - |
| -0.0122 | 0.0013 | 5.17E-22 | 3,032,440 | primary | - |
| 0.0070  | 0.0012 | 7.06E-09 | 3,036,680 | primary | - |
| 0.0153  | 0.0013 | 8.99E-33 | 3,029,940 | primary | - |
| 0.0088  | 0.0012 | 2.05E-13 | 3,036,680 | primary | - |
| 0.0088  | 0.0012 | 9.68E-13 | 3,034,960 | primary | - |
| 0.0096  | 0.0011 | 8.78E-20 | 3,036,090 | primary | - |
| -0.0079 | 0.0012 | 2.47E-10 | 3,024,120 | primary | - |
| 0.0071  | 0.0011 | 9.75E-11 | 3,005,390 | primary | - |
| 0.0157  | 0.0011 | 7.89E-43 | 3,022,290 | primary | - |
| -0.0085 | 0.0011 | 3.63E-15 | 3,036,660 | primary | - |
| 0.0074  | 0.0011 | 5.56E-11 | 3,020,880 | primary | - |
| -0.0085 | 0.0014 | 9.34E-10 | 3,036,680 | primary | - |
| -0.0081 | 0.0013 | 1.35E-10 | 3,036,700 | primary | - |
| 0.0085  | 0.0012 | 3.93E-13 | 3,036,660 | primary | - |
| -0.0082 | 0.0014 | 2.53E-09 | 2,903,620 | primary | - |
| 0.0215  | 0.0037 | 4.10E-09 | 2,840,460 | primary | - |
| 0.0110  | 0.0013 | 1.17E-17 | 3,036,640 | primary | - |
| -0.0073 | 0.0011 | 7.30E-12 | 3,034,430 | primary | - |
| -0.0072 | 0.0011 | 7.83E-12 | 3,036,670 | primary | - |
| -0.0145 | 0.0017 | 1.87E-17 | 3,036,630 | primary | - |
| -0.0139 | 0.0013 | 2.69E-27 | 3,034,880 | primary | - |

|         |        |          |           |         |   |
|---------|--------|----------|-----------|---------|---|
| 0.0063  | 0.0011 | 4.92E-09 | 3,034,930 | primary | - |
| 0.0139  | 0.0015 | 1.94E-21 | 2,983,940 | primary | - |
| -0.0086 | 0.0012 | 2.58E-12 | 3,036,640 | primary | - |
| -0.0076 | 0.0011 | 6.56E-12 | 3,021,870 | primary | - |
| 0.0067  | 0.0011 | 4.22E-09 | 3,036,700 | primary | - |
| -0.0155 | 0.0018 | 1.14E-18 | 3,024,090 | primary | - |
| -0.0079 | 0.0011 | 5.67E-12 | 3,036,690 | primary | - |
| 0.0134  | 0.0017 | 1.17E-15 | 3,036,660 | primary | - |
| 0.0606  | 0.0098 | 5.38E-10 | 2,713,310 | primary | - |
| 0.0082  | 0.0011 | 3.20E-14 | 3,036,120 | primary | - |
| 0.0134  | 0.0014 | 2.16E-21 | 3,024,090 | primary | - |
| 0.0133  | 0.0020 | 8.94E-11 | 3,036,140 | primary | - |
| -0.0085 | 0.0013 | 5.36E-11 | 3,036,670 | primary | - |
| 0.0248  | 0.0036 | 8.39E-12 | 2,894,670 | primary | - |
| -0.0076 | 0.0012 | 8.74E-11 | 3,034,970 | primary | - |
| 0.0146  | 0.0016 | 8.89E-20 | 3,036,680 | primary | - |
| -0.0398 | 0.0071 | 1.80E-08 | 2,894,130 | primary | - |
| 0.0174  | 0.0014 | 9.42E-37 | 3,036,620 | primary | - |
| -0.0151 | 0.0017 | 5.61E-18 | 3,036,620 | primary | - |
| 0.0092  | 0.0011 | 3.11E-18 | 3,019,980 | primary | - |
| -0.0069 | 0.0011 | 8.96E-11 | 3,036,680 | primary | - |
| -0.0204 | 0.0027 | 7.80E-14 | 2,272,170 | primary | - |
| 0.0084  | 0.0012 | 1.52E-12 | 3,036,680 | primary | - |
| 0.0076  | 0.0011 | 7.17E-13 | 3,036,620 | primary | - |
| -0.0074 | 0.0011 | 2.24E-12 | 3,021,670 | primary | - |
| 0.0063  | 0.0011 | 2.14E-09 | 3,036,670 | primary | - |
| 0.0077  | 0.0014 | 1.27E-08 | 3,036,680 | primary | - |
| 0.0094  | 0.0011 | 5.26E-19 | 3,036,650 | primary | - |
| 0.0129  | 0.0018 | 2.72E-13 | 3,034,950 | primary | - |
| -0.0129 | 0.0012 | 2.87E-28 | 3,036,620 | primary | - |
| -0.0082 | 0.0014 | 1.84E-09 | 3,036,700 | primary | - |
| -0.0093 | 0.0011 | 1.96E-17 | 3,036,660 | primary | - |
| 0.0101  | 0.0011 | 5.52E-21 | 3,034,950 | primary | - |
| 0.0091  | 0.0012 | 2.02E-13 | 3,036,670 | primary | - |
| 0.0071  | 0.0011 | 1.93E-11 | 3,029,690 | primary | - |
| 0.0173  | 0.0019 | 1.97E-19 | 2,995,020 | primary | - |
| 0.0071  | 0.0011 | 1.09E-10 | 3,026,260 | primary | - |
| -0.0059 | 0.0011 | 2.16E-08 | 3,010,240 | primary | - |
| -0.0077 | 0.0011 | 2.34E-12 | 2,976,290 | primary | - |
| 0.0106  | 0.0015 | 3.48E-13 | 3,023,970 | primary | - |
| 0.0094  | 0.0011 | 3.06E-18 | 3,020,410 | primary | - |
| 0.0075  | 0.0011 | 5.82E-12 | 3,000,840 | primary | - |
| 0.0101  | 0.0012 | 1.52E-16 | 3,037,480 | primary | - |
| -0.0072 | 0.0011 | 1.48E-11 | 3,019,950 | primary | - |
| -0.0114 | 0.0020 | 4.62E-09 | 3,018,560 | primary | - |
| -0.0070 | 0.0011 | 2.97E-10 | 3,010,670 | primary | - |
| -0.0073 | 0.0011 | 3.53E-11 | 3,037,460 | primary | - |
| -0.0103 | 0.0014 | 5.72E-13 | 3,030,770 | primary | - |

|         |        |          |           |         |   |
|---------|--------|----------|-----------|---------|---|
| -0.0072 | 0.0011 | 2.24E-11 | 3,014,170 | primary | - |
| 0.0064  | 0.0012 | 3.19E-08 | 3,035,070 | primary | - |
| -0.0076 | 0.0011 | 4.95E-13 | 3,036,890 | primary | - |
| -0.0070 | 0.0013 | 4.45E-08 | 3,035,740 | primary | - |
| -0.0098 | 0.0011 | 1.21E-20 | 2,997,510 | primary | - |
| 0.0081  | 0.0011 | 2.03E-14 | 3,033,770 | primary | - |
| -0.0093 | 0.0015 | 7.38E-10 | 2,947,820 | primary | - |
| -0.0193 | 0.0033 | 5.57E-09 | 2,981,990 | primary | - |
| 0.0089  | 0.0012 | 8.66E-14 | 3,037,450 | primary | - |
| -0.0147 | 0.0013 | 1.12E-27 | 3,024,040 | primary | - |
| -0.0086 | 0.0011 | 7.49E-16 | 3,000,820 | primary | - |
| -0.0093 | 0.0011 | 6.91E-19 | 3,026,150 | primary | - |
| 0.0071  | 0.0011 | 4.81E-11 | 3,020,000 | primary | - |
| 0.0092  | 0.0015 | 5.85E-10 | 3,035,020 | primary | - |
| -0.0129 | 0.0013 | 8.67E-24 | 3,037,430 | primary | - |
| -0.0092 | 0.0012 | 6.64E-15 | 3,037,430 | primary | - |
| 0.0116  | 0.0011 | 1.19E-27 | 3,035,760 | primary | - |
| 0.0085  | 0.0011 | 1.26E-14 | 3,037,430 | primary | - |
| 0.0087  | 0.0016 | 2.42E-08 | 3,030,820 | primary | - |
| 0.0115  | 0.0011 | 2.43E-24 | 3,035,960 | primary | - |
| 0.0064  | 0.0011 | 9.71E-09 | 3,037,460 | primary | - |
| -0.0096 | 0.0011 | 4.62E-17 | 3,030,360 | primary | - |
| -0.0065 | 0.0011 | 2.63E-09 | 2,999,150 | primary | - |
| -0.0117 | 0.0014 | 4.43E-16 | 3,036,560 | primary | - |
| -0.0090 | 0.0011 | 6.39E-16 | 3,037,470 | primary | - |
| -0.0251 | 0.0014 | 2.53E-76 | 3,007,100 | primary | - |
| 0.0204  | 0.0015 | 7.91E-42 | 2,271,960 | primary | - |
| -0.1357 | 0.0185 | 2.31E-13 | 2,272,230 | primary | - |
| -0.0066 | 0.0011 | 1.24E-09 | 3,035,760 | primary | - |
| -0.0099 | 0.0013 | 1.42E-14 | 3,037,490 | primary | - |
| 0.0079  | 0.0011 | 1.82E-13 | 3,027,330 | primary | - |
| 0.0063  | 0.0011 | 2.05E-08 | 3,019,930 | primary | - |
| -0.0102 | 0.0011 | 6.50E-21 | 3,037,380 | primary | - |
| 0.0119  | 0.0011 | 4.59E-25 | 3,037,370 | primary | - |
| 0.0070  | 0.0012 | 2.50E-09 | 3,035,780 | primary | - |
| -0.0066 | 0.0011 | 2.62E-09 | 3,012,010 | primary | - |
| 0.0082  | 0.0011 | 8.74E-15 | 3,034,980 | primary | - |
| -0.0105 | 0.0015 | 1.02E-12 | 3,030,030 | primary | - |
| 0.0087  | 0.0014 | 1.30E-10 | 3,022,670 | primary | - |
| -0.0068 | 0.0012 | 4.09E-09 | 3,035,750 | primary | - |
| 0.0123  | 0.0014 | 1.81E-17 | 3,037,440 | primary | - |
| -0.0059 | 0.0011 | 3.18E-08 | 3,035,050 | primary | - |
| 0.0093  | 0.0013 | 2.82E-12 | 3,037,460 | primary | - |
| -0.0063 | 0.0011 | 1.29E-08 | 3,037,450 | primary | - |
| -0.0069 | 0.0011 | 4.76E-11 | 3,033,330 | primary | - |
| 0.0065  | 0.0011 | 5.71E-10 | 3,032,750 | primary | - |
| -0.0083 | 0.0013 | 1.26E-10 | 2,995,810 | primary | - |
| 0.0072  | 0.0011 | 1.35E-11 | 3,020,790 | primary | - |

|         |        |          |           |           |           |
|---------|--------|----------|-----------|-----------|-----------|
| 0.0069  | 0.0012 | 1.32E-08 | 2,992,500 | primary   | -         |
| -0.0089 | 0.0012 | 1.83E-13 | 3,035,510 | primary   | -         |
| 0.0137  | 0.0024 | 6.31E-09 | 2,989,470 | primary   | -         |
| -0.0077 | 0.0011 | 3.94E-13 | 3,020,100 | primary   | -         |
| 0.0132  | 0.0023 | 1.64E-08 | 651,483   | primary   | -         |
| -0.0076 | 0.0011 | 1.02E-12 | 3,025,050 | primary   | -         |
| -0.0095 | 0.0013 | 4.35E-14 | 3,028,540 | primary   | -         |
| -0.0067 | 0.0011 | 1.74E-10 | 3,037,470 | primary   | -         |
| 0.0067  | 0.0012 | 3.15E-08 | 3,033,150 | primary   | -         |
| -0.0063 | 0.0011 | 1.50E-08 | 3,032,790 | primary   | -         |
| 0.0087  | 0.0013 | 1.42E-11 | 3,035,750 | primary   | -         |
| 0.0066  | 0.0011 | 4.35E-10 | 3,037,470 | primary   | -         |
| 0.0086  | 0.0011 | 3.03E-16 | 3,035,780 | primary   | -         |
| -0.0061 | 0.0011 | 1.44E-08 | 3,000,910 | primary   | -         |
| 0.0079  | 0.0011 | 1.42E-13 | 3,016,000 | primary   | -         |
| 0.0062  | 0.0011 | 3.42E-09 | 3,037,480 | primary   | -         |
| -0.0126 | 0.0012 | 1.07E-27 | 3,037,390 | primary   | -         |
| 0.0104  | 0.0011 | 4.96E-21 | 3,037,390 | primary   | -         |
| 0.0077  | 0.0011 | 4.12E-12 | 3,023,240 | primary   | -         |
| 0.0066  | 0.0011 | 9.08E-10 | 3,037,490 | primary   | -         |
| 0.0066  | 0.0011 | 5.17E-10 | 3,037,490 | primary   | -         |
| -0.0060 | 0.0011 | 2.37E-08 | 3,034,890 | primary   | -         |
| -0.0118 | 0.0014 | 2.94E-16 | 3,024,910 | primary   | -         |
| -0.0077 | 0.0013 | 8.72E-09 | 3,035,740 | primary   | -         |
| -0.0117 | 0.0011 | 6.16E-25 | 3,035,660 | primary   | rs4800203 |
| -0.0108 | 0.0016 | 3.85E-11 | 3,037,410 | secondary | N/A       |
| 0.0064  | 0.0011 | 1.33E-09 | 3,035,210 | primary   | -         |
| -0.0177 | 0.0032 | 4.54E-08 | 2,988,220 | primary   | -         |
| 0.0150  | 0.0012 | 4.50E-34 | 3,037,450 | primary   | rs7243759 |
| -0.0084 | 0.0013 | 2.83E-10 | 3,037,480 | secondary | N/A       |
| -0.0087 | 0.0012 | 8.24E-13 | 3,037,470 | primary   | -         |
| -0.0174 | 0.0031 | 2.42E-08 | 2,885,620 | primary   | -         |
| -0.0067 | 0.0011 | 1.78E-09 | 3,037,460 | primary   | -         |
| 0.0090  | 0.0014 | 2.87E-11 | 3,037,450 | primary   | -         |
| 0.0071  | 0.0011 | 3.45E-11 | 3,037,500 | primary   | -         |
| -0.0094 | 0.0011 | 8.18E-19 | 3,035,750 | primary   | -         |
| 0.0139  | 0.0020 | 3.40E-12 | 3,037,460 | primary   | -         |
| 0.0100  | 0.0011 | 4.18E-21 | 3,037,460 | primary   | -         |
| 0.0075  | 0.0011 | 4.03E-12 | 3,037,450 | primary   | -         |
| -0.0102 | 0.0011 | 5.31E-22 | 3,037,430 | primary   | -         |
| -0.0179 | 0.0011 | 8.02E-60 | 3,037,200 | primary   | -         |
| -0.0088 | 0.0011 | 1.58E-15 | 3,037,450 | primary   | -         |
| -0.0091 | 0.0013 | 1.86E-12 | 3,037,400 | primary   | -         |
| 0.0159  | 0.0014 | 1.87E-30 | 3,037,330 | primary   | -         |
| -0.0114 | 0.0013 | 2.34E-19 | 3,037,410 | primary   | -         |
| 0.0120  | 0.0011 | 2.50E-28 | 3,037,390 | primary   | -         |
| -0.0181 | 0.0024 | 1.05E-13 | 3,032,650 | primary   | -         |
| -0.0085 | 0.0015 | 9.28E-09 | 2,272,190 | primary   | -         |

|         |        |          |           |         |   |
|---------|--------|----------|-----------|---------|---|
| 0.0090  | 0.0014 | 4.16E-10 | 3,037,470 | primary | - |
| 0.0177  | 0.0023 | 7.59E-15 | 3,031,580 | primary | - |
| 0.0092  | 0.0016 | 2.70E-09 | 3,037,470 | primary | - |
| -0.0098 | 0.0012 | 1.62E-16 | 3,035,000 | primary | - |
| 0.0169  | 0.0029 | 7.01E-09 | 2,966,590 | primary | - |
| -0.0102 | 0.0014 | 2.64E-13 | 3,037,460 | primary | - |
| -0.0083 | 0.0014 | 3.15E-09 | 3,037,470 | primary | - |
| -0.0156 | 0.0017 | 2.15E-20 | 3,033,660 | primary | - |
| 0.0156  | 0.0020 | 1.21E-14 | 3,037,460 | primary | - |
| 0.0111  | 0.0011 | 1.34E-25 | 3,037,400 | primary | - |
| -0.0084 | 0.0011 | 1.79E-15 | 3,037,430 | primary | - |
| -0.0077 | 0.0012 | 6.53E-11 | 3,037,450 | primary | - |
| -0.0067 | 0.0011 | 3.09E-10 | 3,037,470 | primary | - |
| 0.0114  | 0.0020 | 6.93E-09 | 3,037,430 | primary | - |
| 0.0172  | 0.0011 | 2.68E-56 | 3,037,200 | primary | - |
| -0.0070 | 0.0011 | 7.94E-10 | 3,036,920 | primary | - |
| -0.0087 | 0.0011 | 7.79E-16 | 3,037,460 | primary | - |
| 0.0222  | 0.0016 | 4.36E-45 | 3,037,360 | primary | - |
| -0.0365 | 0.0066 | 3.16E-08 | 2,930,260 | primary | - |
| -0.0256 | 0.0032 | 1.01E-15 | 3,036,610 | primary | - |
| 0.0079  | 0.0011 | 1.28E-12 | 3,037,490 | primary | - |
| -0.0067 | 0.0012 | 1.27E-08 | 3,017,000 | primary | - |
| -0.0064 | 0.0011 | 2.41E-08 | 3,035,760 | primary | - |
| 0.0166  | 0.0028 | 4.33E-09 | 3,000,850 | primary | - |
| -0.0080 | 0.0011 | 3.97E-14 | 3,024,910 | primary | - |
| -0.0068 | 0.0011 | 1.07E-10 | 3,037,480 | primary | - |
| -0.0085 | 0.0011 | 5.02E-16 | 3,037,440 | primary | - |
| -0.0077 | 0.0012 | 2.56E-11 | 3,037,460 | primary | - |
| 0.0098  | 0.0012 | 5.51E-16 | 3,037,440 | primary | - |
| -0.0068 | 0.0012 | 4.89E-09 | 3,037,460 | primary | - |
| -0.0062 | 0.0011 | 1.66E-08 | 3,037,490 | primary | - |
| -0.0164 | 0.0028 | 7.12E-09 | 3,009,500 | primary | - |
| 0.0068  | 0.0011 | 2.98E-10 | 3,037,450 | primary | - |
| 0.0067  | 0.0011 | 6.93E-10 | 3,014,590 | primary | - |
| -0.0074 | 0.0012 | 2.47E-10 | 3,033,340 | primary | - |
| -0.0069 | 0.0012 | 2.41E-08 | 3,035,750 | primary | - |
| 0.0107  | 0.0018 | 2.95E-09 | 2,920,520 | primary | - |
| 0.0083  | 0.0011 | 6.78E-14 | 3,036,880 | primary | - |
| 0.0065  | 0.0011 | 2.36E-09 | 3,019,110 | primary | - |
| -0.0082 | 0.0011 | 5.74E-14 | 3,037,480 | primary | - |
| 0.0073  | 0.0011 | 4.44E-11 | 3,000,490 | primary | - |
| 0.0124  | 0.0012 | 4.22E-26 | 3,035,680 | primary | - |
| -0.0137 | 0.0013 | 6.61E-27 | 3,036,520 | primary | - |
| 0.0120  | 0.0015 | 1.51E-15 | 3,031,410 | primary | - |
| 0.0116  | 0.0019 | 5.16E-10 | 2,787,460 | primary | - |
| 0.0107  | 0.0016 | 4.24E-11 | 3,011,220 | primary | - |
| 0.0111  | 0.0017 | 1.09E-10 | 3,004,070 | primary | - |
| 0.0062  | 0.0011 | 3.93E-08 | 3,014,680 | primary | - |

|         |        |          |           |         |   |
|---------|--------|----------|-----------|---------|---|
| -0.0098 | 0.0016 | 2.21E-10 | 2,992,820 | primary | - |
| -0.0069 | 0.0011 | 9.01E-10 | 3,031,100 | primary | - |
| 0.0060  | 0.0011 | 1.82E-08 | 3,032,230 | primary | - |
| 0.0250  | 0.0025 | 3.60E-23 | 2,859,740 | primary | - |
| -0.0103 | 0.0011 | 1.44E-19 | 3,016,470 | primary | - |
| -0.0098 | 0.0011 | 2.16E-18 | 3,034,150 | primary | - |
| -0.0062 | 0.0011 | 8.71E-09 | 3,009,950 | primary | - |
| 0.0077  | 0.0013 | 2.34E-09 | 3,037,450 | primary | - |
| -0.0083 | 0.0011 | 4.65E-15 | 3,035,730 | primary | - |
| 0.0070  | 0.0011 | 6.34E-10 | 3,037,440 | primary | - |
| 0.0123  | 0.0020 | 2.93E-10 | 2,995,520 | primary | - |
| -0.0201 | 0.0024 | 9.07E-17 | 2,988,820 | primary | - |
| -0.0091 | 0.0013 | 7.24E-12 | 2,872,180 | primary | - |
| 0.0073  | 0.0012 | 2.10E-09 | 3,000,420 | primary | - |
| 0.0069  | 0.0011 | 4.28E-11 | 3,027,510 | primary | - |
| 0.0107  | 0.0011 | 3.59E-21 | 3,031,300 | primary | - |
| 0.0065  | 0.0011 | 8.27E-10 | 3,015,600 | primary | - |
| 0.0063  | 0.0011 | 1.49E-08 | 3,037,480 | primary | - |
| 0.0135  | 0.0018 | 1.35E-13 | 3,015,710 | primary | - |
| -0.0088 | 0.0014 | 7.89E-10 | 3,035,720 | primary | - |
| -0.0134 | 0.0023 | 9.82E-09 | 2,981,760 | primary | - |
| -0.0065 | 0.0011 | 1.24E-09 | 3,036,650 | primary | - |
| -0.0100 | 0.0012 | 4.93E-18 | 3,032,450 | primary | - |
| -0.0098 | 0.0015 | 3.47E-11 | 3,000,980 | primary | - |
| -0.0066 | 0.0011 | 3.67E-09 | 3,000,830 | primary | - |
| -0.0154 | 0.0015 | 3.17E-26 | 3,000,760 | primary | - |
| 0.0064  | 0.0012 | 3.29E-08 | 3,037,500 | primary | - |
| 0.0061  | 0.0011 | 1.91E-08 | 3,037,480 | primary | - |
| 0.0108  | 0.0013 | 6.68E-16 | 3,032,080 | primary | - |
| -0.0085 | 0.0013 | 2.22E-10 | 3,002,090 | primary | - |
| -0.0063 | 0.0011 | 3.72E-09 | 3,035,780 | primary | - |
| -0.0076 | 0.0013 | 1.37E-08 | 3,018,330 | primary | - |
| 0.0074  | 0.0011 | 1.96E-12 | 3,029,740 | primary | - |
| 0.0063  | 0.0011 | 2.49E-09 | 3,019,100 | primary | - |
| 0.0075  | 0.0011 | 2.35E-11 | 3,002,650 | primary | - |
| -0.0088 | 0.0015 | 3.74E-09 | 3,001,960 | primary | - |
| 0.0165  | 0.0030 | 4.10E-08 | 2,052,950 | primary | - |
| -0.0098 | 0.0016 | 1.99E-09 | 3,008,360 | primary | - |
| -0.0071 | 0.0011 | 2.60E-11 | 2,983,000 | primary | - |
| -0.0093 | 0.0015 | 4.08E-10 | 3,004,040 | primary | - |
| 0.0066  | 0.0012 | 1.23E-08 | 2,884,030 | primary | - |
| -0.0255 | 0.0033 | 2.41E-14 | 2,942,010 | primary | - |
| -0.0083 | 0.0013 | 6.45E-10 | 3,018,230 | primary | - |
| 0.0073  | 0.0011 | 1.70E-11 | 3,035,750 | primary | - |
| -0.0144 | 0.0015 | 2.36E-22 | 2,844,460 | primary | - |
| 0.0073  | 0.0011 | 3.31E-12 | 3,027,040 | primary | - |
| 0.0107  | 0.0018 | 4.92E-09 | 3,003,350 | primary | - |
| -0.0109 | 0.0013 | 8.91E-17 | 2,995,610 | primary | - |



|         |        |          |           |         |   |
|---------|--------|----------|-----------|---------|---|
| 0.0113  | 0.0013 | 8.63E-18 | 3,029,360 | primary | - |
| 0.0074  | 0.0014 | 4.35E-08 | 3,029,040 | primary | - |
| 0.0075  | 0.0011 | 2.16E-12 | 3,037,430 | primary | - |
| 0.0261  | 0.0043 | 1.91E-09 | 2,844,730 | primary | - |
| -0.0103 | 0.0014 | 1.21E-12 | 3,037,440 | primary | - |
| 0.0078  | 0.0011 | 3.07E-13 | 3,035,510 | primary | - |
| -0.0138 | 0.0014 | 5.87E-24 | 3,035,150 | primary | - |
| 0.0102  | 0.0012 | 6.90E-18 | 2,972,400 | primary | - |
| 0.0155  | 0.0027 | 1.24E-08 | 2,787,970 | primary | - |
| 0.0075  | 0.0011 | 3.97E-11 | 3,035,800 | primary | - |
| -0.0071 | 0.0011 | 1.73E-10 | 3,021,740 | primary | - |
| 0.0098  | 0.0012 | 3.72E-16 | 3,037,460 | primary | - |
| -0.0081 | 0.0012 | 1.22E-11 | 3,037,490 | primary | - |
| 0.0116  | 0.0012 | 5.04E-23 | 3,037,420 | primary | - |
| -0.0074 | 0.0011 | 4.81E-11 | 3,033,340 | primary | - |
| 0.0062  | 0.0011 | 2.52E-08 | 3,024,950 | primary | - |
| 0.0080  | 0.0012 | 1.80E-11 | 3,037,470 | primary | - |
| 0.0088  | 0.0011 | 1.96E-15 | 3,033,300 | primary | - |
| -0.0112 | 0.0016 | 1.50E-12 | 3,037,470 | primary | - |
| -0.0128 | 0.0018 | 3.23E-12 | 3,036,540 | primary | - |
| -0.0190 | 0.0032 | 3.40E-09 | 2,208,350 | primary | - |
| 0.0068  | 0.0011 | 1.71E-10 | 3,037,450 | primary | - |
| 0.0339  | 0.0046 | 2.64E-13 | 2,999,380 | primary | - |
| -0.0086 | 0.0011 | 2.93E-15 | 3,035,510 | primary | - |
| 0.0104  | 0.0019 | 3.96E-08 | 3,007,170 | primary | - |
| -0.0080 | 0.0011 | 2.15E-13 | 3,037,450 | primary | - |
| -0.0076 | 0.0014 | 2.67E-08 | 3,037,510 | primary | - |
| -0.0068 | 0.0011 | 1.03E-10 | 3,024,450 | primary | - |
| -0.0066 | 0.0011 | 4.68E-10 | 3,035,740 | primary | - |
| 0.0097  | 0.0013 | 8.63E-14 | 3,036,960 | primary | - |
| -0.0072 | 0.0011 | 1.35E-11 | 3,035,530 | primary | - |
| -0.0118 | 0.0011 | 6.51E-26 | 3,037,420 | primary | - |
| -0.0221 | 0.0039 | 1.80E-08 | 2,937,700 | primary | - |
| 0.0091  | 0.0013 | 5.02E-13 | 3,023,250 | primary | - |
| 0.0184  | 0.0014 | 1.02E-39 | 3,029,170 | primary | - |
| -0.0106 | 0.0014 | 2.71E-13 | 3,037,460 | primary | - |
| 0.0080  | 0.0011 | 2.49E-14 | 3,037,430 | primary | - |
| 0.0080  | 0.0012 | 3.30E-11 | 3,024,560 | primary | - |
| -0.0072 | 0.0011 | 2.43E-11 | 3,035,730 | primary | - |
| -0.0090 | 0.0016 | 1.47E-08 | 2,986,500 | primary | - |
| 0.0067  | 0.0011 | 2.52E-09 | 3,035,800 | primary | - |
| -0.0150 | 0.0020 | 2.75E-14 | 3,030,920 | primary | - |
| -0.0070 | 0.0011 | 3.14E-11 | 3,033,530 | primary | - |
| 0.0076  | 0.0011 | 9.11E-13 | 3,035,740 | primary | - |
| 0.0110  | 0.0019 | 4.39E-09 | 3,037,470 | primary | - |
| 0.0080  | 0.0013 | 2.13E-10 | 3,033,820 | primary | - |
| 0.0485  | 0.0087 | 2.56E-08 | 2,713,330 | primary | - |
| 0.0076  | 0.0012 | 5.27E-11 | 3,035,750 | primary | - |

|         |        |          |           |           |            |
|---------|--------|----------|-----------|-----------|------------|
| -0.0096 | 0.0017 | 7.46E-09 | 3,037,490 | secondary | N/A        |
| -0.0229 | 0.0019 | 4.18E-33 | 3,037,360 | primary   | rs6660666  |
| 0.0125  | 0.0011 | 1.92E-29 | 2,996,620 | primary   | -          |
| 0.0126  | 0.0018 | 1.01E-11 | 3,025,840 | primary   | -          |
| 0.0132  | 0.0014 | 6.69E-22 | 3,037,230 | secondary | N/A        |
| -0.0171 | 0.0012 | 1.24E-43 | 3,037,220 | primary   | rs631248   |
| -0.0123 | 0.0022 | 1.40E-08 | 2,991,560 | primary   | -          |
| -0.0140 | 0.0011 | 2.18E-37 | 3,037,390 | primary   | -          |
| -0.0104 | 0.0012 | 3.18E-19 | 3,037,430 | primary   | -          |
| 0.0222  | 0.0038 | 4.93E-09 | 2,972,180 | primary   | -          |
| -0.0070 | 0.0011 | 3.95E-11 | 3,037,440 | primary   | -          |
| -0.0717 | 0.0110 | 7.51E-11 | 2,901,680 | primary   | -          |
| -0.0107 | 0.0011 | 3.19E-23 | 3,000,800 | primary   | -          |
| 0.0153  | 0.0027 | 1.47E-08 | 2,896,690 | primary   | -          |
| 0.0078  | 0.0011 | 1.25E-13 | 3,037,450 | primary   | -          |
| -0.0079 | 0.0012 | 1.79E-11 | 3,037,490 | primary   | -          |
| 0.0106  | 0.0011 | 2.44E-23 | 3,037,430 | primary   | -          |
| 0.0070  | 0.0011 | 2.48E-10 | 3,019,930 | primary   | -          |
| 0.0073  | 0.0012 | 1.51E-09 | 3,035,750 | primary   | -          |
| 0.0107  | 0.0011 | 1.20E-22 | 3,037,430 | primary   | -          |
| 0.0164  | 0.0014 | 2.38E-31 | 3,034,940 | primary   | -          |
| -0.0077 | 0.0011 | 5.14E-13 | 3,037,450 | primary   | -          |
| 0.0070  | 0.0011 | 2.87E-11 | 3,037,460 | primary   | -          |
| 0.0159  | 0.0026 | 1.17E-09 | 3,027,550 | primary   | -          |
| 0.0091  | 0.0015 | 3.54E-09 | 3,002,300 | primary   | -          |
| -0.0135 | 0.0015 | 6.97E-19 | 3,033,290 | primary   | -          |
| -0.0068 | 0.0011 | 1.32E-09 | 3,037,460 | primary   | -          |
| -0.0119 | 0.0013 | 5.47E-19 | 3,037,460 | primary   | -          |
| 0.0248  | 0.0024 | 6.10E-26 | 3,033,660 | primary   | -          |
| -0.0078 | 0.0012 | 1.54E-10 | 3,023,260 | primary   | -          |
| -0.0177 | 0.0022 | 1.15E-15 | 3,022,190 | primary   | -          |
| 0.0083  | 0.0011 | 3.14E-14 | 3,037,510 | primary   | -          |
| 0.0069  | 0.0011 | 3.73E-10 | 3,030,070 | primary   | -          |
| 0.0187  | 0.0024 | 4.74E-15 | 3,036,530 | primary   | -          |
| -0.0129 | 0.0017 | 1.26E-13 | 3,037,450 | primary   | -          |
| -0.0077 | 0.0013 | 1.06E-09 | 3,037,460 | primary   | -          |
| 0.0126  | 0.0016 | 8.74E-15 | 3,016,100 | primary   | -          |
| -0.0064 | 0.0011 | 2.30E-09 | 3,037,440 | primary   | -          |
| 0.0098  | 0.0011 | 2.59E-19 | 3,037,450 | primary   | -          |
| 0.0081  | 0.0011 | 1.45E-13 | 3,037,360 | primary   | -          |
| 0.0256  | 0.0019 | 8.33E-42 | 3,007,460 | primary   | -          |
| -0.0188 | 0.0014 | 3.89E-44 | 3,037,260 | primary   | -          |
| 0.0093  | 0.0014 | 8.87E-12 | 3,023,250 | secondary | N/A        |
| -0.0146 | 0.0014 | 2.70E-26 | 3,037,440 | primary   | rs11210176 |
| -0.0165 | 0.0027 | 6.45E-10 | 2,855,980 | primary   | -          |
| 0.0106  | 0.0011 | 3.95E-23 | 3,037,430 | primary   | -          |
| -0.0083 | 0.0012 | 6.61E-12 | 3,000,860 | primary   | -          |
| 0.0323  | 0.0028 | 2.54E-31 | 3,026,360 | primary   | -          |

|         |        |          |           |           |           |
|---------|--------|----------|-----------|-----------|-----------|
| 0.0602  | 0.0108 | 2.28E-08 | 2,802,470 | primary   | -         |
| -0.0109 | 0.0014 | 2.90E-15 | 3,037,470 | primary   | -         |
| 0.0107  | 0.0011 | 2.02E-23 | 3,037,470 | primary   | -         |
| 0.0079  | 0.0011 | 2.98E-13 | 3,035,740 | primary   | -         |
| 0.0083  | 0.0011 | 1.60E-13 | 3,037,350 | secondary | N/A       |
| -0.0175 | 0.0018 | 2.10E-22 | 3,035,670 | primary   | rs6603950 |
| 0.0059  | 0.0011 | 2.80E-08 | 3,037,490 | primary   | -         |
| -0.0105 | 0.0013 | 1.17E-15 | 3,035,750 | primary   | -         |
| -0.0093 | 0.0013 | 2.05E-13 | 3,037,480 | primary   | -         |
| -0.0132 | 0.0023 | 1.22E-08 | 3,037,480 | primary   | -         |
| 0.0102  | 0.0016 | 1.43E-10 | 3,037,470 | primary   | -         |
| -0.0090 | 0.0012 | 1.29E-13 | 3,024,950 | primary   | -         |
| -0.0083 | 0.0014 | 4.37E-09 | 2,990,840 | primary   | -         |
| -0.0081 | 0.0011 | 2.34E-13 | 3,023,230 | primary   | -         |
| -0.0099 | 0.0013 | 2.16E-14 | 3,024,930 | primary   | -         |
| 0.0083  | 0.0011 | 2.02E-13 | 3,035,740 | primary   | -         |
| 0.0104  | 0.0013 | 1.27E-16 | 3,020,800 | primary   | -         |
| -0.0066 | 0.0011 | 8.99E-10 | 3,037,470 | primary   | -         |
| -0.0070 | 0.0011 | 9.65E-11 | 3,037,470 | primary   | -         |
| -0.0076 | 0.0012 | 1.95E-10 | 3,037,500 | primary   | -         |
| -0.0094 | 0.0011 | 1.05E-17 | 3,035,710 | primary   | -         |
| 0.0212  | 0.0011 | 1.03E-88 | 3,035,480 | primary   | -         |
| 0.0115  | 0.0012 | 1.95E-22 | 3,037,380 | primary   | -         |
| -0.0076 | 0.0013 | 9.79E-09 | 3,037,410 | primary   | -         |
| -0.0104 | 0.0014 | 6.96E-13 | 3,037,470 | primary   | -         |
| 0.0091  | 0.0012 | 7.40E-14 | 3,035,750 | primary   | -         |
| 0.0112  | 0.0011 | 2.20E-24 | 3,036,870 | primary   | -         |
| -0.0089 | 0.0011 | 7.89E-16 | 3,037,430 | primary   | -         |
| 0.0162  | 0.0022 | 5.37E-14 | 3,037,430 | primary   | -         |
| -0.0140 | 0.0022 | 9.22E-11 | 3,037,480 | primary   | -         |
| -0.0084 | 0.0013 | 2.29E-10 | 3,000,840 | primary   | -         |
| 0.0192  | 0.0026 | 1.90E-13 | 3,024,990 | primary   | -         |
| 0.0198  | 0.0015 | 4.01E-42 | 3,037,390 | primary   | -         |
| -0.0121 | 0.0021 | 4.09E-09 | 3,010,030 | primary   | -         |
| -0.0127 | 0.0011 | 1.90E-28 | 3,021,880 | primary   | -         |
| 0.0508  | 0.0066 | 2.16E-14 | 2,940,410 | primary   | -         |
| -0.0098 | 0.0013 | 3.96E-13 | 3,037,490 | primary   | -         |
| 0.0093  | 0.0013 | 3.94E-13 | 3,037,500 | primary   | -         |
| 0.0093  | 0.0011 | 2.95E-18 | 3,037,460 | primary   | -         |
| 0.0063  | 0.0011 | 1.90E-09 | 3,037,480 | primary   | -         |
| -0.0071 | 0.0012 | 2.36E-09 | 3,037,460 | primary   | -         |
| -0.0071 | 0.0012 | 6.73E-10 | 3,036,940 | primary   | -         |
| 0.0107  | 0.0011 | 1.84E-22 | 3,037,470 | primary   | -         |
| -0.0071 | 0.0011 | 2.83E-11 | 3,037,440 | primary   | -         |
| 0.0299  | 0.0055 | 4.89E-08 | 2,906,110 | primary   | -         |
| 0.0089  | 0.0011 | 2.89E-15 | 3,037,410 | primary   | -         |
| -0.0112 | 0.0011 | 1.15E-23 | 3,037,410 | primary   | -         |
| -0.0058 | 0.0011 | 3.49E-08 | 3,037,480 | primary   | -         |

|         |        |          |           |           |           |
|---------|--------|----------|-----------|-----------|-----------|
| 0.0097  | 0.0011 | 7.46E-18 | 3,037,480 | primary   | -         |
| -0.0156 | 0.0012 | 4.95E-42 | 3,035,640 | primary   | -         |
| -0.0115 | 0.0011 | 2.51E-27 | 3,036,830 | primary   | -         |
| -0.0177 | 0.0018 | 1.34E-23 | 3,011,670 | primary   | -         |
| -0.0079 | 0.0011 | 1.09E-13 | 3,037,480 | primary   | -         |
| 0.0149  | 0.0015 | 1.21E-24 | 3,037,460 | primary   | -         |
| -0.0107 | 0.0014 | 1.30E-14 | 3,037,430 | secondary | N/A       |
| -0.0105 | 0.0012 | 9.61E-19 | 3,016,560 | primary   | rs197420  |
| 0.0129  | 0.0011 | 1.32E-29 | 3,037,410 | primary   | -         |
| 0.0114  | 0.0011 | 2.43E-24 | 3,035,740 | primary   | -         |
| -0.0315 | 0.0031 | 9.00E-25 | 3,005,060 | primary   | -         |
| 0.0059  | 0.0011 | 2.57E-08 | 3,035,770 | primary   | -         |
| -0.0956 | 0.0162 | 3.78E-09 | 2,291,390 | primary   | -         |
| 0.0104  | 0.0017 | 7.62E-10 | 3,019,250 | primary   | -         |
| -0.0184 | 0.0023 | 1.62E-15 | 3,035,770 | primary   | -         |
| 0.0087  | 0.0012 | 8.11E-13 | 3,017,810 | primary   | -         |
| -0.0065 | 0.0011 | 2.54E-09 | 3,035,790 | primary   | -         |
| -0.0068 | 0.0012 | 4.21E-09 | 3,023,220 | primary   | -         |
| -0.0112 | 0.0012 | 1.30E-19 | 3,037,460 | primary   | -         |
| -0.0100 | 0.0017 | 1.92E-09 | 2,995,010 | primary   | -         |
| -0.0081 | 0.0011 | 2.20E-13 | 3,031,200 | primary   | -         |
| 0.0228  | 0.0039 | 3.05E-09 | 2,866,760 | primary   | -         |
| -0.0173 | 0.0031 | 1.89E-08 | 2,974,910 | primary   | -         |
| 0.0134  | 0.0020 | 4.59E-11 | 2,912,810 | primary   | -         |
| 0.0089  | 0.0013 | 6.85E-12 | 3,037,470 | primary   | -         |
| -0.0109 | 0.0017 | 2.73E-10 | 3,023,220 | primary   | -         |
| 0.0101  | 0.0011 | 1.28E-19 | 3,037,400 | primary   | -         |
| -0.0333 | 0.0050 | 3.56E-11 | 2,126,650 | primary   | -         |
| -0.0111 | 0.0014 | 3.97E-16 | 3,035,710 | primary   | -         |
| 0.0096  | 0.0014 | 6.84E-12 | 3,017,860 | secondary | N/A       |
| -0.0125 | 0.0014 | 1.16E-19 | 2,993,420 | primary   | rs4845368 |
| 0.0072  | 0.0011 | 1.07E-10 | 3,034,840 | primary   | -         |
| -0.0147 | 0.0024 | 1.41E-09 | 3,027,660 | primary   | -         |
| -0.0290 | 0.0034 | 1.31E-17 | 2,991,680 | primary   | -         |
| -0.0123 | 0.0011 | 1.33E-30 | 3,023,140 | primary   | -         |
| 0.0061  | 0.0011 | 2.28E-08 | 3,015,270 | primary   | -         |
| -0.0088 | 0.0015 | 1.29E-08 | 3,030,990 | primary   | -         |
| -0.0086 | 0.0013 | 1.39E-11 | 3,023,190 | primary   | -         |
| 0.0137  | 0.0019 | 2.06E-12 | 3,017,700 | primary   | -         |
| 0.0096  | 0.0015 | 1.69E-10 | 3,035,400 | primary   | -         |
| -0.0364 | 0.0058 | 3.80E-10 | 2,834,110 | primary   | -         |
| -0.0078 | 0.0011 | 1.49E-13 | 3,035,760 | primary   | -         |
| -0.0076 | 0.0011 | 1.22E-12 | 3,037,450 | primary   | -         |
| 0.0152  | 0.0023 | 2.29E-11 | 3,015,290 | primary   | -         |
| -0.0069 | 0.0012 | 5.97E-09 | 3,037,500 | primary   | -         |
| -0.0128 | 0.0021 | 2.34E-09 | 3,037,470 | primary   | -         |
| 0.0095  | 0.0014 | 1.57E-11 | 3,037,440 | primary   | -         |
| -0.0075 | 0.0013 | 1.13E-08 | 3,035,780 | primary   | -         |

|         |        |          |           |         |   |
|---------|--------|----------|-----------|---------|---|
| 0.0091  | 0.0012 | 2.53E-13 | 2,272,150 | primary | - |
| 0.0103  | 0.0011 | 7.84E-21 | 3,037,420 | primary | - |
| -0.0066 | 0.0011 | 3.87E-09 | 3,037,460 | primary | - |
| -0.0117 | 0.0019 | 6.52E-10 | 3,037,420 | primary | - |
| 0.0082  | 0.0015 | 2.84E-08 | 3,037,480 | primary | - |
| -0.0110 | 0.0016 | 3.79E-12 | 3,037,480 | primary | - |
| -0.0116 | 0.0017 | 6.91E-12 | 3,035,730 | primary | - |
| -0.0168 | 0.0011 | 7.81E-53 | 2,993,640 | primary | - |
| 0.0090  | 0.0013 | 5.08E-12 | 3,037,500 | primary | - |
| 0.0104  | 0.0012 | 3.77E-19 | 3,031,460 | primary | - |
| -0.0104 | 0.0019 | 2.72E-08 | 3,037,490 | primary | - |
| -0.0085 | 0.0011 | 9.54E-14 | 3,037,480 | primary | - |
| -0.0076 | 0.0012 | 5.28E-11 | 3,037,470 | primary | - |
| 0.0090  | 0.0014 | 9.95E-11 | 3,029,450 | primary | - |
| -0.0131 | 0.0020 | 6.92E-11 | 3,037,470 | primary | - |
| -0.0068 | 0.0011 | 1.59E-10 | 3,030,510 | primary | - |
| 0.0072  | 0.0011 | 2.89E-11 | 3,037,450 | primary | - |
| -0.0483 | 0.0080 | 1.75E-09 | 2,855,720 | primary | - |
| 0.0079  | 0.0011 | 2.76E-12 | 3,037,460 | primary | - |
| 0.0089  | 0.0011 | 3.20E-17 | 3,024,370 | primary | - |
| 0.0133  | 0.0011 | 9.06E-35 | 3,037,380 | primary | - |
| 0.0081  | 0.0012 | 1.48E-11 | 3,037,480 | primary | - |
| 0.0088  | 0.0011 | 7.12E-17 | 3,037,470 | primary | - |
| 0.0240  | 0.0035 | 6.55E-12 | 2,847,740 | primary | - |
| -0.0137 | 0.0013 | 1.19E-25 | 3,024,910 | primary | - |
| 0.0088  | 0.0014 | 2.62E-10 | 3,037,480 | primary | - |
| 0.0115  | 0.0017 | 2.01E-11 | 3,037,460 | primary | - |
| 0.0072  | 0.0011 | 1.27E-11 | 3,035,730 | primary | - |
| -0.0109 | 0.0015 | 1.52E-13 | 3,008,870 | primary | - |
| 0.0097  | 0.0017 | 2.80E-08 | 3,024,020 | primary | - |
| 0.0064  | 0.0011 | 9.80E-10 | 3,036,920 | primary | - |
| 0.0103  | 0.0013 | 4.37E-15 | 3,037,470 | primary | - |
| -0.0096 | 0.0013 | 9.93E-13 | 3,000,800 | primary | - |
| 0.0084  | 0.0014 | 5.16E-09 | 3,037,470 | primary | - |
| -0.0087 | 0.0013 | 4.76E-11 | 3,037,480 | primary | - |
| 0.0077  | 0.0011 | 2.42E-11 | 3,037,470 | primary | - |
| 0.0072  | 0.0011 | 9.92E-12 | 3,023,200 | primary | - |
| 0.0099  | 0.0011 | 2.27E-19 | 3,035,710 | primary | - |
| 0.0079  | 0.0011 | 1.07E-13 | 3,037,450 | primary | - |
| 0.0203  | 0.0013 | 1.61E-56 | 3,037,270 | primary | - |
| -0.0081 | 0.0011 | 4.58E-13 | 3,023,190 | primary | - |
| -0.0320 | 0.0054 | 3.06E-09 | 2,959,030 | primary | - |
| -0.0087 | 0.0011 | 3.16E-14 | 3,036,900 | primary | - |
| 0.0083  | 0.0014 | 4.92E-09 | 3,037,500 | primary | - |
| -0.0115 | 0.0013 | 1.82E-17 | 3,037,430 | primary | - |
| -0.0067 | 0.0011 | 2.77E-09 | 3,034,050 | primary | - |
| -0.0064 | 0.0011 | 1.44E-09 | 3,037,450 | primary | - |
| -0.0123 | 0.0014 | 4.70E-18 | 3,037,420 | primary | - |

|         |        |          |           |         |   |
|---------|--------|----------|-----------|---------|---|
| 0.0091  | 0.0013 | 2.87E-13 | 3,037,430 | primary | - |
| -0.0350 | 0.0059 | 3.02E-09 | 2,913,970 | primary | - |
| -0.0080 | 0.0012 | 4.18E-12 | 3,037,500 | primary | - |
| -0.0088 | 0.0013 | 3.62E-12 | 3,037,470 | primary | - |
| -0.0088 | 0.0011 | 2.28E-16 | 3,037,450 | primary | - |
| 0.0259  | 0.0043 | 1.85E-09 | 2,996,180 | primary | - |
| 0.0121  | 0.0014 | 4.40E-18 | 3,037,460 | primary | - |
| 0.0072  | 0.0011 | 9.54E-12 | 3,037,440 | primary | - |
| 0.0160  | 0.0027 | 5.47E-09 | 3,021,280 | primary | - |
| 0.0078  | 0.0011 | 1.18E-11 | 3,037,480 | primary | - |
| -0.0126 | 0.0021 | 3.85E-09 | 3,034,840 | primary | - |
| 0.0088  | 0.0013 | 6.44E-12 | 3,037,460 | primary | - |
| 0.0079  | 0.0012 | 1.05E-10 | 3,037,480 | primary | - |
| -0.0120 | 0.0011 | 8.19E-27 | 3,031,150 | primary | - |
| 0.0109  | 0.0011 | 4.66E-25 | 3,022,630 | primary | - |
| 0.0074  | 0.0011 | 1.75E-12 | 3,024,930 | primary | - |
| 0.0073  | 0.0011 | 3.17E-12 | 3,037,480 | primary | - |
| 0.0073  | 0.0012 | 7.41E-10 | 3,035,780 | primary | - |
| -0.0067 | 0.0011 | 2.45E-10 | 3,035,780 | primary | - |
| -0.0088 | 0.0011 | 9.82E-16 | 3,033,260 | primary | - |
| -0.0116 | 0.0018 | 3.04E-10 | 1,484,690 | primary | - |
| 0.0067  | 0.0011 | 8.04E-10 | 3,035,720 | primary | - |
| 0.0143  | 0.0012 | 2.45E-35 | 3,037,300 | primary | - |
| 0.0096  | 0.0016 | 1.09E-09 | 3,034,970 | primary | - |
| -0.0157 | 0.0017 | 1.28E-19 | 3,031,440 | primary | - |
| 0.0135  | 0.0023 | 7.98E-09 | 3,000,550 | primary | - |
| -0.0080 | 0.0011 | 5.45E-14 | 3,000,770 | primary | - |
| 0.0077  | 0.0011 | 2.46E-12 | 3,037,460 | primary | - |
| -0.0060 | 0.0011 | 1.61E-08 | 3,037,480 | primary | - |
| 0.0059  | 0.0011 | 2.95E-08 | 3,037,490 | primary | - |
| 0.0269  | 0.0043 | 2.81E-10 | 2,988,420 | primary | - |
| 0.0108  | 0.0013 | 4.89E-17 | 3,037,450 | primary | - |
| 0.0059  | 0.0011 | 4.05E-08 | 3,037,470 | primary | - |
| -0.0109 | 0.0013 | 4.32E-16 | 3,037,430 | primary | - |
| -0.0069 | 0.0011 | 2.27E-10 | 3,037,460 | primary | - |
| -0.0073 | 0.0011 | 9.40E-12 | 3,022,340 | primary | - |
| -0.0077 | 0.0011 | 4.09E-13 | 3,037,430 | primary | - |
| -0.0083 | 0.0013 | 1.60E-10 | 3,037,470 | primary | - |
| 0.0090  | 0.0014 | 7.12E-11 | 3,037,440 | primary | - |
| -0.0068 | 0.0011 | 3.35E-10 | 3,035,830 | primary | - |
| 0.0065  | 0.0011 | 6.54E-09 | 3,023,210 | primary | - |
| -0.0093 | 0.0011 | 2.76E-17 | 3,037,450 | primary | - |
| 0.0082  | 0.0014 | 2.99E-09 | 3,035,060 | primary | - |
| 0.0076  | 0.0011 | 5.00E-13 | 3,037,480 | primary | - |
| 0.0072  | 0.0011 | 4.86E-11 | 3,037,440 | primary | - |
| -0.0074 | 0.0011 | 1.64E-12 | 3,037,480 | primary | - |
| -0.0076 | 0.0011 | 1.14E-11 | 3,037,440 | primary | - |
| -0.0088 | 0.0013 | 4.77E-12 | 3,030,010 | primary | - |

|         |        |          |           |           |           |
|---------|--------|----------|-----------|-----------|-----------|
| -0.0106 | 0.0015 | 4.99E-13 | 2,272,140 | primary   | -         |
| 0.0068  | 0.0011 | 1.79E-09 | 3,037,440 | primary   | -         |
| -0.0078 | 0.0011 | 2.01E-13 | 3,037,440 | primary   | -         |
| 0.0128  | 0.0021 | 4.30E-10 | 3,021,580 | primary   | -         |
| -0.0120 | 0.0020 | 8.51E-10 | 3,021,600 | primary   | -         |
| -0.0354 | 0.0050 | 2.12E-12 | 3,005,440 | primary   | -         |
| -0.0117 | 0.0021 | 2.60E-08 | 3,019,100 | primary   | -         |
| 0.0102  | 0.0011 | 1.04E-19 | 3,037,430 | primary   | -         |
| 0.0089  | 0.0011 | 1.61E-16 | 3,020,760 | primary   | -         |
| 0.0076  | 0.0011 | 3.32E-12 | 3,037,490 | primary   | -         |
| -0.0104 | 0.0016 | 2.12E-11 | 3,037,450 | primary   | -         |
| -0.0123 | 0.0013 | 7.00E-20 | 3,035,740 | primary   | -         |
| -0.0079 | 0.0011 | 2.50E-12 | 3,037,450 | primary   | -         |
| 0.0100  | 0.0011 | 1.20E-18 | 3,037,450 | primary   | -         |
| -0.0073 | 0.0011 | 4.42E-12 | 3,037,480 | primary   | -         |
| -0.0091 | 0.0013 | 1.52E-12 | 3,007,740 | primary   | -         |
| 0.0082  | 0.0011 | 2.98E-14 | 3,037,460 | primary   | -         |
| -0.0107 | 0.0011 | 3.56E-24 | 3,036,870 | primary   | -         |
| 0.0070  | 0.0011 | 4.68E-11 | 3,035,760 | primary   | -         |
| 0.0080  | 0.0011 | 1.89E-13 | 3,000,820 | primary   | -         |
| -0.0106 | 0.0012 | 4.95E-18 | 3,024,150 | primary   | -         |
| -0.0098 | 0.0011 | 3.72E-18 | 3,035,100 | primary   | -         |
| -0.0067 | 0.0011 | 4.08E-09 | 3,035,630 | primary   | -         |
| 0.0213  | 0.0029 | 1.31E-13 | 3,030,610 | primary   | -         |
| 0.0081  | 0.0011 | 6.02E-13 | 3,035,730 | primary   | -         |
| 0.0154  | 0.0026 | 3.82E-09 | 3,037,450 | primary   | -         |
| 0.0089  | 0.0014 | 6.20E-11 | 3,023,200 | primary   | -         |
| 0.0095  | 0.0015 | 7.95E-11 | 2,966,600 | primary   | -         |
| -0.0068 | 0.0011 | 1.07E-10 | 3,037,440 | primary   | -         |
| -0.0074 | 0.0011 | 2.87E-12 | 3,030,200 | primary   | -         |
| -0.0078 | 0.0014 | 8.07E-09 | 3,035,190 | primary   | -         |
| 0.0079  | 0.0011 | 2.10E-12 | 3,037,440 | primary   | -         |
| 0.0100  | 0.0015 | 8.27E-11 | 3,037,350 | secondary | N/A       |
| 0.0103  | 0.0014 | 9.05E-14 | 3,035,600 | primary   | rs4812281 |
| -0.0063 | 0.0010 | 2.02E-09 | 3,035,530 | primary   | -         |
| 0.0107  | 0.0013 | 1.25E-16 | 3,028,600 | primary   | -         |
| -0.0080 | 0.0012 | 2.23E-11 | 3,001,630 | primary   | -         |
| 0.0097  | 0.0016 | 1.42E-09 | 3,011,850 | primary   | -         |
| 0.0074  | 0.0010 | 1.65E-12 | 3,036,890 | primary   | -         |
| 0.0082  | 0.0011 | 2.05E-13 | 3,037,470 | primary   | -         |
| -0.0116 | 0.0011 | 5.02E-24 | 3,033,230 | primary   | -         |
| -0.0096 | 0.0012 | 3.68E-16 | 3,037,430 | primary   | -         |
| 0.0103  | 0.0015 | 1.06E-11 | 3,024,100 | primary   | -         |
| 0.0096  | 0.0013 | 3.17E-14 | 3,037,430 | primary   | -         |
| 0.0078  | 0.0014 | 8.85E-09 | 3,037,460 | primary   | -         |
| -0.0135 | 0.0023 | 6.24E-09 | 3,032,900 | primary   | -         |
| -0.0100 | 0.0016 | 1.92E-10 | 3,022,430 | primary   | -         |
| 0.0104  | 0.0011 | 6.43E-20 | 3,036,630 | primary   | -         |

|         |        |          |           |           |           |
|---------|--------|----------|-----------|-----------|-----------|
| -0.0089 | 0.0012 | 9.98E-14 | 3,036,660 | primary   | -         |
| 0.0069  | 0.0012 | 3.56E-09 | 3,036,640 | primary   | -         |
| -0.0094 | 0.0013 | 6.05E-13 | 3,036,670 | primary   | -         |
| -0.0129 | 0.0022 | 8.20E-09 | 3,036,300 | primary   | -         |
| -0.0080 | 0.0012 | 7.58E-11 | 3,036,660 | primary   | -         |
| 0.0088  | 0.0011 | 1.78E-16 | 3,036,630 | primary   | -         |
| 0.0107  | 0.0011 | 1.09E-21 | 3,036,590 | primary   | -         |
| 0.0094  | 0.0012 | 7.34E-15 | 3,036,650 | primary   | -         |
| -0.0100 | 0.0011 | 4.00E-20 | 3,025,130 | primary   | -         |
| -0.0084 | 0.0011 | 1.31E-14 | 3,021,560 | primary   | -         |
| 0.0122  | 0.0020 | 1.20E-09 | 3,035,850 | primary   | -         |
| 0.0066  | 0.0012 | 1.67E-08 | 3,037,490 | primary   | -         |
| -0.0079 | 0.0011 | 4.51E-14 | 3,031,090 | primary   | -         |
| -0.0092 | 0.0013 | 3.49E-13 | 3,028,690 | primary   | -         |
| 0.0071  | 0.0011 | 5.20E-11 | 3,036,610 | primary   | -         |
| -0.0066 | 0.0011 | 3.99E-09 | 3,037,490 | primary   | -         |
| -0.0246 | 0.0038 | 8.14E-11 | 3,019,160 | primary   | -         |
| 0.0084  | 0.0012 | 3.83E-13 | 3,032,350 | primary   | -         |
| -0.0079 | 0.0011 | 7.13E-13 | 3,036,920 | primary   | -         |
| -0.0083 | 0.0011 | 3.26E-14 | 3,037,450 | primary   | -         |
| 0.0068  | 0.0012 | 1.86E-08 | 3,037,370 | secondary | N/A       |
| -0.0107 | 0.0012 | 1.47E-18 | 3,037,350 | primary   | rs2530661 |
| 0.0093  | 0.0011 | 2.29E-16 | 3,037,450 | primary   | -         |
| -0.0085 | 0.0012 | 3.94E-13 | 3,037,490 | primary   | -         |
| -0.0159 | 0.0012 | 4.38E-42 | 3,037,310 | primary   | -         |
| -0.0217 | 0.0023 | 5.31E-22 | 3,023,140 | primary   | -         |
| -0.0158 | 0.0018 | 9.64E-19 | 3,033,060 | primary   | -         |
| -0.0133 | 0.0024 | 2.17E-08 | 2,986,140 | primary   | -         |
| -0.0093 | 0.0012 | 1.90E-14 | 3,005,800 | primary   | -         |
| 0.0113  | 0.0011 | 7.00E-27 | 3,037,430 | primary   | -         |
| 0.0149  | 0.0018 | 3.19E-16 | 2,993,290 | primary   | -         |
| -0.0089 | 0.0011 | 5.32E-16 | 3,035,750 | primary   | -         |
| 0.0135  | 0.0016 | 1.40E-17 | 3,033,690 | primary   | -         |
| 0.0078  | 0.0011 | 2.11E-13 | 3,037,430 | primary   | -         |
| 0.0072  | 0.0012 | 7.08E-10 | 2,522,380 | primary   | -         |
| -0.0071 | 0.0010 | 1.67E-11 | 3,037,440 | primary   | -         |
| 0.0070  | 0.0011 | 5.21E-11 | 3,017,020 | primary   | -         |
| 0.0061  | 0.0011 | 2.28E-08 | 3,031,100 | primary   | -         |
| 0.0084  | 0.0012 | 1.65E-12 | 3,037,460 | primary   | -         |
| 0.0184  | 0.0028 | 8.12E-11 | 2,949,720 | primary   | -         |
| 0.0061  | 0.0011 | 4.33E-08 | 3,037,480 | primary   | -         |
| -0.0079 | 0.0011 | 6.36E-13 | 2,986,540 | primary   | -         |
| 0.0092  | 0.0011 | 9.93E-17 | 3,033,770 | primary   | -         |
| 0.0066  | 0.0012 | 1.23E-08 | 2,881,170 | primary   | -         |
| 0.0074  | 0.0011 | 3.53E-12 | 3,008,700 | primary   | -         |
| 0.0094  | 0.0011 | 6.68E-19 | 3,016,170 | primary   | -         |
| 0.0081  | 0.0013 | 2.43E-10 | 3,019,990 | primary   | -         |
| 0.0113  | 0.0013 | 1.00E-18 | 3,034,210 | primary   | -         |



|         |        |          |           |           |             |
|---------|--------|----------|-----------|-----------|-------------|
| -0.0071 | 0.0011 | 7.24E-11 | 3,033,300 | primary   | -           |
| 0.0102  | 0.0017 | 2.34E-09 | 3,037,480 | primary   | -           |
| -0.0211 | 0.0037 | 1.42E-08 | 2,825,700 | primary   | -           |
| -0.0062 | 0.0011 | 8.20E-09 | 3,037,500 | primary   | -           |
| 0.0087  | 0.0014 | 9.78E-11 | 3,030,060 | primary   | -           |
| 0.0105  | 0.0017 | 1.05E-09 | 3,037,360 | primary   | rs7603132   |
| 0.0111  | 0.0018 | 1.38E-09 | 3,029,990 | secondary | N/A         |
| 0.0084  | 0.0011 | 8.07E-15 | 3,037,480 | primary   | -           |
| 0.0266  | 0.0028 | 9.21E-21 | 3,010,880 | primary   | -           |
| 0.0182  | 0.0028 | 8.83E-11 | 2,977,230 | primary   | -           |
| -0.0082 | 0.0013 | 9.76E-10 | 3,037,500 | primary   | -           |
| -0.0080 | 0.0011 | 1.05E-13 | 3,020,600 | primary   | -           |
| 0.0118  | 0.0014 | 1.36E-17 | 3,000,800 | primary   | rs6760539   |
| 0.0068  | 0.0012 | 2.43E-08 | 3,033,270 | secondary | N/A         |
| 0.0152  | 0.0020 | 1.32E-14 | 2,872,450 | primary   | -           |
| 0.0243  | 0.0016 | 7.17E-54 | 3,033,120 | primary   | -           |
| 0.0229  | 0.0031 | 1.60E-13 | 3,035,740 | primary   | -           |
| 0.0107  | 0.0019 | 1.76E-08 | 3,036,940 | primary   | -           |
| -0.0154 | 0.0016 | 6.06E-21 | 3,037,440 | primary   | -           |
| 0.0062  | 0.0011 | 4.68E-09 | 3,037,470 | primary   | -           |
| -0.0087 | 0.0011 | 5.90E-15 | 3,024,960 | primary   | -           |
| -0.0087 | 0.0013 | 4.19E-12 | 3,035,040 | primary   | -           |
| 0.0098  | 0.0012 | 2.60E-16 | 3,037,440 | primary   | -           |
| -0.0065 | 0.0011 | 2.08E-09 | 3,037,490 | primary   | -           |
| -0.0093 | 0.0011 | 1.64E-18 | 3,031,730 | primary   | -           |
| 0.0102  | 0.0011 | 1.28E-21 | 3,037,420 | primary   | -           |
| -0.0082 | 0.0012 | 5.77E-12 | 3,035,750 | primary   | -           |
| 0.0075  | 0.0011 | 9.62E-12 | 3,024,940 | primary   | -           |
| 0.0114  | 0.0018 | 3.36E-10 | 3,037,460 | primary   | -           |
| 0.0284  | 0.0045 | 2.40E-10 | 3,019,870 | secondary | N/A         |
| -0.0110 | 0.0016 | 2.51E-12 | 2,982,440 | primary   | -           |
| -0.0510 | 0.0059 | 2.91E-18 | 3,002,970 | primary   | rs183720801 |
| -0.0457 | 0.0079 | 5.78E-09 | 2,713,320 | primary   | -           |
| -0.0355 | 0.0058 | 6.90E-10 | 2,848,130 | primary   | -           |
| -0.0092 | 0.0016 | 5.08E-09 | 2,272,190 | primary   | -           |
| -0.0102 | 0.0012 | 1.43E-17 | 2,596,310 | primary   | -           |
| -0.0095 | 0.0014 | 1.13E-11 | 3,037,460 | primary   | -           |
| -0.0079 | 0.0013 | 3.79E-10 | 3,037,500 | primary   | -           |
| 0.0120  | 0.0011 | 2.82E-29 | 3,037,410 | primary   | -           |
| -0.0075 | 0.0011 | 3.04E-12 | 3,037,460 | primary   | -           |
| 0.0070  | 0.0011 | 3.81E-11 | 3,033,310 | primary   | -           |
| -0.0064 | 0.0011 | 1.07E-08 | 3,034,960 | primary   | -           |
| 0.0063  | 0.0011 | 2.28E-09 | 3,035,760 | primary   | -           |
| 0.0084  | 0.0011 | 3.74E-15 | 3,037,490 | primary   | -           |
| 0.0089  | 0.0011 | 7.36E-16 | 3,035,730 | primary   | -           |
| -0.0114 | 0.0011 | 2.42E-26 | 2,996,670 | primary   | -           |
| -0.0065 | 0.0012 | 1.85E-08 | 3,037,470 | primary   | -           |
| -0.0099 | 0.0012 | 7.84E-16 | 3,035,730 | primary   | -           |

|         |        |          |           |           |            |
|---------|--------|----------|-----------|-----------|------------|
| 0.0112  | 0.0012 | 5.52E-21 | 3,035,490 | primary   | -          |
| -0.0075 | 0.0011 | 4.35E-11 | 3,035,760 | primary   | -          |
| 0.0084  | 0.0012 | 4.75E-12 | 3,024,930 | primary   | -          |
| 0.0070  | 0.0011 | 3.16E-11 | 3,037,480 | primary   | -          |
| -0.0091 | 0.0012 | 8.18E-14 | 3,037,470 | primary   | -          |
| 0.0084  | 0.0011 | 1.34E-14 | 3,037,470 | primary   | -          |
| -0.0153 | 0.0025 | 9.31E-10 | 2,992,150 | primary   | -          |
| -0.0083 | 0.0011 | 5.89E-14 | 3,037,430 | primary   | -          |
| -0.0400 | 0.0059 | 1.13E-11 | 2,964,130 | primary   | -          |
| -0.0129 | 0.0023 | 2.81E-08 | 3,037,110 | primary   | -          |
| 0.0082  | 0.0012 | 2.47E-11 | 3,035,770 | primary   | -          |
| -0.0103 | 0.0014 | 8.31E-13 | 3,035,800 | primary   | -          |
| -0.0193 | 0.0022 | 1.23E-18 | 3,037,440 | primary   | -          |
| 0.0125  | 0.0011 | 2.63E-29 | 3,037,390 | primary   | -          |
| 0.0082  | 0.0015 | 4.83E-08 | 3,037,490 | primary   | -          |
| -0.0131 | 0.0011 | 6.65E-34 | 3,037,450 | primary   | -          |
| -0.0625 | 0.0096 | 8.65E-11 | 2,969,950 | primary   | -          |
| -0.0124 | 0.0018 | 1.58E-12 | 3,035,660 | primary   | -          |
| -0.0128 | 0.0017 | 4.63E-14 | 3,022,190 | primary   | -          |
| 0.0075  | 0.0012 | 5.29E-10 | 3,035,600 | primary   | -          |
| -0.0093 | 0.0011 | 1.16E-17 | 3,035,590 | primary   | -          |
| 0.0080  | 0.0011 | 1.01E-12 | 2,990,510 | primary   | -          |
| -0.0175 | 0.0019 | 5.73E-20 | 3,035,230 | primary   | -          |
| -0.0081 | 0.0011 | 6.36E-14 | 3,035,630 | primary   | -          |
| 0.0121  | 0.0019 | 4.77E-10 | 3,035,690 | primary   | -          |
| -0.0130 | 0.0011 | 1.52E-32 | 3,035,610 | primary   | -          |
| -0.0113 | 0.0011 | 9.93E-25 | 3,035,210 | primary   | -          |
| -0.0094 | 0.0014 | 1.42E-11 | 3,037,520 | primary   | -          |
| 0.0204  | 0.0013 | 1.59E-52 | 3,037,340 | primary   | -          |
| 0.0212  | 0.0016 | 2.52E-40 | 3,035,740 | primary   | rs7423940  |
| 0.0130  | 0.0014 | 1.71E-19 | 3,035,780 | secondary | N/A        |
| -0.0243 | 0.0036 | 1.56E-11 | 2,987,900 | primary   | -          |
| 0.0269  | 0.0017 | 1.20E-59 | 3,034,970 | primary   | -          |
| -0.0170 | 0.0027 | 2.19E-10 | 3,037,470 | primary   | -          |
| 0.0158  | 0.0020 | 3.56E-15 | 3,033,500 | primary   | -          |
| 0.0095  | 0.0011 | 8.39E-19 | 3,035,020 | primary   | -          |
| 0.0278  | 0.0048 | 9.22E-09 | 2,955,140 | primary   | -          |
| -0.0214 | 0.0033 | 1.38E-10 | 2,547,820 | primary   | -          |
| 0.0123  | 0.0013 | 1.73E-21 | 3,037,490 | primary   | rs78539852 |
| 0.0134  | 0.0020 | 2.04E-11 | 3,034,070 | primary   | -          |
| 0.0211  | 0.0024 | 9.17E-19 | 3,037,090 | secondary | N/A        |
| 0.0106  | 0.0011 | 1.68E-22 | 3,037,450 | primary   | -          |
| -0.0089 | 0.0016 | 3.50E-08 | 3,037,470 | primary   | -          |
| 0.0093  | 0.0013 | 4.32E-13 | 3,037,480 | primary   | -          |
| -0.0084 | 0.0011 | 2.83E-14 | 3,035,000 | primary   | -          |
| 0.0104  | 0.0013 | 6.79E-16 | 3,037,460 | primary   | -          |
| -0.0127 | 0.0011 | 6.66E-29 | 3,034,860 | primary   | -          |
| 0.0112  | 0.0017 | 5.04E-11 | 3,037,390 | primary   | -          |

|         |        |          |           |         |   |
|---------|--------|----------|-----------|---------|---|
| -0.0195 | 0.0029 | 2.01E-11 | 2,966,470 | primary | - |
| -0.0102 | 0.0013 | 3.77E-16 | 3,037,370 | primary | - |
| 0.0128  | 0.0019 | 2.04E-11 | 3,037,470 | primary | - |
| -0.0523 | 0.0087 | 1.58E-09 | 2,854,830 | primary | - |
| 0.0105  | 0.0012 | 2.24E-19 | 3,037,450 | primary | - |
| -0.0082 | 0.0011 | 3.91E-13 | 3,037,450 | primary | - |
| 0.0131  | 0.0014 | 7.89E-20 | 3,037,470 | primary | - |
| 0.0115  | 0.0011 | 3.65E-24 | 3,035,760 | primary | - |
| -0.0122 | 0.0020 | 1.32E-09 | 3,034,340 | primary | - |
| 0.0111  | 0.0011 | 3.02E-23 | 3,000,810 | primary | - |
| 0.0180  | 0.0021 | 3.86E-18 | 3,033,960 | primary | - |
| 0.0167  | 0.0011 | 1.14E-51 | 3,037,310 | primary | - |
| 0.0153  | 0.0015 | 5.13E-25 | 3,037,440 | primary | - |
| -0.0357 | 0.0046 | 1.23E-14 | 3,020,760 | primary | - |
| -0.0229 | 0.0036 | 1.34E-10 | 2,921,030 | primary | - |
| -0.0125 | 0.0012 | 2.10E-24 | 3,037,360 | primary | - |
| 0.0116  | 0.0017 | 2.61E-12 | 3,037,460 | primary | - |
| 0.0125  | 0.0014 | 2.41E-19 | 3,000,860 | primary | - |
| -0.0300 | 0.0044 | 7.64E-12 | 3,007,230 | primary | - |
| -0.0472 | 0.0070 | 1.19E-11 | 2,851,770 | primary | - |
| -0.0073 | 0.0012 | 7.08E-10 | 3,035,750 | primary | - |
| -0.0074 | 0.0012 | 9.62E-10 | 3,037,450 | primary | - |
| -0.0072 | 0.0011 | 2.24E-11 | 3,037,460 | primary | - |
| -0.0065 | 0.0011 | 1.59E-09 | 3,000,850 | primary | - |
| 0.0089  | 0.0011 | 5.11E-15 | 3,037,510 | primary | - |
| -0.0134 | 0.0015 | 3.31E-18 | 3,035,740 | primary | - |
| -0.0106 | 0.0011 | 2.52E-21 | 3,021,440 | primary | - |
| -0.0593 | 0.0090 | 5.44E-11 | 2,903,180 | primary | - |
| -0.0773 | 0.0119 | 9.69E-11 | 2,713,330 | primary | - |
| 0.0082  | 0.0015 | 4.34E-08 | 3,012,620 | primary | - |
| -0.0100 | 0.0011 | 3.41E-20 | 3,016,970 | primary | - |
| -0.0075 | 0.0011 | 1.12E-11 | 3,024,930 | primary | - |
| 0.0113  | 0.0011 | 3.23E-26 | 3,020,770 | primary | - |
| 0.0074  | 0.0011 | 6.67E-12 | 3,035,070 | primary | - |
| -0.0090 | 0.0011 | 4.87E-17 | 3,015,110 | primary | - |
| -0.0066 | 0.0011 | 3.60E-09 | 3,035,790 | primary | - |
| -0.0680 | 0.0117 | 6.17E-09 | 2,829,800 | primary | - |
| 0.0316  | 0.0053 | 2.78E-09 | 3,015,560 | primary | - |
| 0.0097  | 0.0011 | 2.57E-19 | 3,017,350 | primary | - |
| -0.0311 | 0.0044 | 1.25E-12 | 2,869,250 | primary | - |
| 0.0085  | 0.0013 | 1.13E-10 | 3,037,470 | primary | - |
| -0.0250 | 0.0043 | 6.68E-09 | 3,015,400 | primary | - |
| -0.0157 | 0.0026 | 1.23E-09 | 3,037,190 | primary | - |
| -0.0097 | 0.0012 | 6.47E-17 | 3,037,420 | primary | - |
| 0.0206  | 0.0027 | 4.29E-14 | 3,005,530 | primary | - |
| -0.0166 | 0.0020 | 2.57E-17 | 3,020,760 | primary | - |
| 0.0244  | 0.0029 | 9.90E-17 | 3,033,900 | primary | - |
| -0.0142 | 0.0013 | 7.08E-27 | 3,037,510 | primary | - |

|         |        |          |           |           |           |
|---------|--------|----------|-----------|-----------|-----------|
| -0.0099 | 0.0011 | 6.09E-18 | 3,019,270 | primary   | -         |
| -0.0080 | 0.0011 | 5.44E-14 | 3,037,500 | primary   | -         |
| -0.0116 | 0.0018 | 1.46E-10 | 3,037,440 | primary   | -         |
| -0.0108 | 0.0013 | 1.64E-17 | 3,037,500 | primary   | -         |
| -0.0349 | 0.0048 | 6.20E-13 | 2,996,170 | primary   | -         |
| -0.0293 | 0.0046 | 2.69E-10 | 3,006,220 | primary   | -         |
| 0.0097  | 0.0015 | 2.25E-11 | 3,035,740 | primary   | -         |
| 0.0133  | 0.0014 | 4.90E-21 | 3,019,070 | primary   | -         |
| -0.0312 | 0.0042 | 7.17E-14 | 2,508,870 | primary   | -         |
| -0.0309 | 0.0036 | 2.15E-17 | 3,029,750 | primary   | -         |
| 0.0144  | 0.0022 | 3.77E-11 | 3,037,490 | primary   | -         |
| 0.0380  | 0.0061 | 4.77E-10 | 2,877,280 | primary   | -         |
| -0.0118 | 0.0011 | 9.52E-28 | 3,035,150 | primary   | -         |
| 0.0352  | 0.0055 | 1.36E-10 | 2,891,870 | primary   | -         |
| 0.0141  | 0.0015 | 3.31E-20 | 3,037,310 | primary   | -         |
| 0.0117  | 0.0014 | 2.02E-17 | 3,037,050 | secondary | N/A       |
| 0.0219  | 0.0027 | 5.46E-16 | 3,003,100 | primary   | -         |
| 0.0187  | 0.0013 | 1.13E-45 | 3,035,460 | primary   | rs4583487 |
| 0.0091  | 0.0011 | 3.09E-17 | 3,037,420 | primary   | -         |
| -0.0079 | 0.0012 | 1.18E-11 | 3,037,450 | primary   | -         |
| 0.1103  | 0.0129 | 1.14E-17 | 2,887,080 | primary   | -         |
| 0.0085  | 0.0014 | 4.59E-10 | 3,037,500 | primary   | -         |
| 0.0115  | 0.0017 | 3.22E-11 | 3,020,790 | primary   | -         |
| 0.0186  | 0.0021 | 2.86E-19 | 2,984,740 | primary   | rs1837714 |
| 0.0103  | 0.0012 | 2.01E-17 | 3,037,360 | secondary | N/A       |
| 0.0687  | 0.0117 | 4.37E-09 | 2,845,710 | primary   | -         |
| 0.0766  | 0.0110 | 4.03E-12 | 2,812,100 | primary   | -         |
| 0.0130  | 0.0016 | 3.12E-16 | 3,019,950 | primary   | -         |
| 0.0199  | 0.0016 | 5.31E-36 | 3,037,430 | primary   | -         |
| 0.0066  | 0.0011 | 1.02E-09 | 3,036,930 | primary   | -         |
| 0.0190  | 0.0011 | 3.64E-67 | 3,037,320 | primary   | -         |
| 0.0076  | 0.0012 | 4.51E-10 | 3,037,500 | primary   | -         |
| 0.0316  | 0.0050 | 2.45E-10 | 2,913,270 | primary   | -         |
| -0.0082 | 0.0011 | 5.58E-14 | 3,037,470 | primary   | -         |
| 0.0089  | 0.0012 | 8.81E-14 | 3,034,980 | primary   | -         |
| 0.0108  | 0.0014 | 2.21E-15 | 2,959,990 | primary   | -         |
| -0.0083 | 0.0012 | 9.13E-12 | 3,035,750 | primary   | -         |
| 0.0080  | 0.0011 | 9.01E-14 | 3,037,490 | primary   | -         |
| 0.0123  | 0.0016 | 2.97E-15 | 3,035,660 | primary   | -         |
| -0.0116 | 0.0011 | 2.79E-27 | 3,035,640 | primary   | -         |
| 0.0470  | 0.0069 | 1.26E-11 | 2,713,330 | primary   | -         |
| 0.0103  | 0.0011 | 6.84E-21 | 3,023,140 | primary   | -         |
| -0.0102 | 0.0011 | 1.99E-21 | 3,033,970 | primary   | -         |
| -0.0071 | 0.0011 | 2.14E-10 | 3,035,690 | primary   | -         |
| 0.0131  | 0.0014 | 2.16E-21 | 3,035,640 | primary   | -         |
| -0.0140 | 0.0023 | 8.82E-10 | 2,992,220 | primary   | -         |
| -0.0094 | 0.0011 | 4.30E-18 | 3,037,430 | primary   | -         |
| 0.0254  | 0.0041 | 6.32E-10 | 2,937,260 | primary   | -         |

|         |        |          |           |           |                     |
|---------|--------|----------|-----------|-----------|---------------------|
| -0.0089 | 0.0013 | 2.86E-12 | 3,037,450 | primary   | -                   |
| 0.0069  | 0.0011 | 2.85E-10 | 3,037,510 | primary   | -                   |
| 0.0081  | 0.0011 | 1.72E-13 | 3,037,450 | primary   | -                   |
| 0.0129  | 0.0012 | 6.57E-28 | 3,037,440 | primary   | -                   |
| 0.0072  | 0.0012 | 3.32E-10 | 3,036,950 | primary   | -                   |
| 0.0196  | 0.0025 | 7.61E-15 | 3,023,690 | primary   | -                   |
| 0.0654  | 0.0108 | 1.26E-09 | 2,850,280 | primary   | -                   |
| 0.0573  | 0.0102 | 1.88E-08 | 2,838,450 | primary   | -                   |
| -0.0170 | 0.0018 | 9.23E-22 | 3,024,890 | primary   | -                   |
| 0.0735  | 0.0122 | 1.67E-09 | 2,876,460 | primary   | -                   |
| 0.0112  | 0.0018 | 3.67E-10 | 2,966,890 | primary   | -                   |
| -0.0092 | 0.0011 | 1.42E-17 | 3,035,720 | primary   | -                   |
| -0.0121 | 0.0011 | 7.26E-28 | 3,036,910 | primary   | -                   |
| 0.0105  | 0.0015 | 4.37E-13 | 3,037,480 | primary   | -                   |
| 0.0065  | 0.0011 | 1.41E-09 | 3,037,470 | primary   | -                   |
| -0.0072 | 0.0011 | 7.41E-11 | 3,037,480 | primary   | -                   |
| 0.0248  | 0.0034 | 2.84E-13 | 3,007,550 | primary   | -                   |
| -0.0080 | 0.0011 | 9.49E-14 | 3,037,480 | primary   | -                   |
| 0.0846  | 0.0129 | 4.89E-11 | 2,713,330 | primary   | -                   |
| -0.0088 | 0.0014 | 2.48E-10 | 3,037,490 | primary   | -                   |
| -0.0201 | 0.0029 | 7.46E-12 | 3,021,600 | primary   | -                   |
| 0.0256  | 0.0046 | 1.98E-08 | 2,966,360 | primary   | -                   |
| 0.0107  | 0.0016 | 1.32E-11 | 3,037,510 | primary   | -                   |
| 0.0084  | 0.0011 | 7.76E-15 | 3,037,510 | primary   | -                   |
| -0.0087 | 0.0011 | 9.04E-16 | 3,033,340 | primary   | -                   |
| 0.0125  | 0.0014 | 2.49E-19 | 3,037,470 | primary   | -                   |
| -0.0083 | 0.0011 | 2.83E-14 | 3,037,470 | primary   | -                   |
| 0.0137  | 0.0016 | 2.52E-18 | 3,037,450 | primary   | -                   |
| 0.0087  | 0.0014 | 3.56E-10 | 3,037,470 | primary   | -                   |
| -0.0100 | 0.0013 | 5.36E-15 | 3,037,460 | primary   | -                   |
| -0.0297 | 0.0038 | 5.06E-15 | 3,033,800 | primary   | -                   |
| -0.0133 | 0.0011 | 1.12E-31 | 3,037,410 | primary   | -                   |
| -0.0155 | 0.0020 | 3.40E-14 | 3,035,780 | primary   | -                   |
| 0.0080  | 0.0011 | 1.23E-13 | 3,037,430 | primary   | -                   |
| 0.0146  | 0.0013 | 2.49E-27 | 3,037,470 | secondary | N/A                 |
| -0.0159 | 0.0014 | 4.34E-31 | 3,037,380 | primary   | rs11685467,rs355588 |
| 0.0142  | 0.0023 | 1.30E-09 | 3,037,440 | secondary | N/A                 |
| -0.0083 | 0.0011 | 3.98E-13 | 3,003,120 | primary   | -                   |
| -0.0083 | 0.0012 | 3.40E-12 | 3,035,760 | primary   | -                   |
| -0.0100 | 0.0011 | 9.57E-21 | 3,037,420 | primary   | -                   |
| -0.0108 | 0.0012 | 2.74E-19 | 3,035,770 | primary   | -                   |
| -0.0160 | 0.0011 | 3.75E-47 | 3,037,330 | primary   | -                   |
| -0.0163 | 0.0011 | 8.66E-50 | 3,037,360 | primary   | -                   |
| -0.0086 | 0.0012 | 5.54E-13 | 3,033,320 | primary   | -                   |
| 0.0088  | 0.0012 | 6.60E-14 | 3,033,290 | primary   | -                   |
| -0.0104 | 0.0016 | 1.28E-10 | 3,032,790 | primary   | -                   |
| -0.0242 | 0.0021 | 6.53E-32 | 3,037,420 | primary   | -                   |
| 0.0075  | 0.0013 | 6.79E-09 | 3,034,050 | secondary | N/A                 |

|         |        |          |           |         |            |
|---------|--------|----------|-----------|---------|------------|
| -0.0103 | 0.0012 | 1.34E-18 | 3,037,470 | primary | rs55855159 |
| 0.1072  | 0.0161 | 2.92E-11 | 2,751,730 | primary | -          |
| -0.0145 | 0.0023 | 1.40E-10 | 3,035,050 | primary | -          |
| 0.0441  | 0.0069 | 1.78E-10 | 2,931,730 | primary | -          |
| 0.0141  | 0.0016 | 1.40E-18 | 3,000,080 | primary | -          |
| -0.0144 | 0.0014 | 1.09E-23 | 3,037,450 | primary | -          |
| 0.0114  | 0.0015 | 6.31E-14 | 3,037,490 | primary | -          |
| -0.0189 | 0.0013 | 5.03E-46 | 3,037,420 | primary | -          |
| 0.0076  | 0.0012 | 2.34E-10 | 3,034,230 | primary | -          |
| 0.0153  | 0.0021 | 6.39E-13 | 3,030,110 | primary | -          |
| -0.0224 | 0.0034 | 7.03E-11 | 2,997,050 | primary | -          |
| 0.0079  | 0.0014 | 2.42E-08 | 3,037,490 | primary | -          |
| -0.0089 | 0.0012 | 6.56E-14 | 3,035,760 | primary | -          |
| 0.0081  | 0.0012 | 2.41E-11 | 3,037,500 | primary | -          |
| 0.0076  | 0.0011 | 2.95E-12 | 3,037,450 | primary | -          |
| -0.0074 | 0.0011 | 1.21E-10 | 3,021,520 | primary | -          |
| 0.0093  | 0.0013 | 2.18E-13 | 3,037,460 | primary | -          |
| -0.0120 | 0.0020 | 2.85E-09 | 3,037,500 | primary | -          |
| 0.0089  | 0.0013 | 1.84E-12 | 2,999,140 | primary | -          |
| 0.0105  | 0.0017 | 1.73E-09 | 3,034,050 | primary | -          |
| -0.0084 | 0.0012 | 2.37E-12 | 3,024,920 | primary | -          |
| -0.0109 | 0.0013 | 4.40E-16 | 3,037,490 | primary | -          |
| -0.0088 | 0.0011 | 2.31E-16 | 3,035,730 | primary | -          |
| -0.0085 | 0.0012 | 3.79E-13 | 3,015,970 | primary | -          |
| -0.0100 | 0.0012 | 1.11E-16 | 3,037,510 | primary | -          |
| 0.0073  | 0.0012 | 4.56E-10 | 3,037,490 | primary | -          |
| -0.0110 | 0.0012 | 5.89E-20 | 3,037,490 | primary | -          |
| -0.0269 | 0.0045 | 2.92E-09 | 2,890,320 | primary | -          |
| 0.0165  | 0.0018 | 5.43E-20 | 3,036,650 | primary | -          |
| -0.0110 | 0.0011 | 4.95E-22 | 3,037,450 | primary | -          |
| -0.0140 | 0.0017 | 3.89E-17 | 3,035,770 | primary | -          |
| 0.0177  | 0.0022 | 4.28E-16 | 3,037,430 | primary | -          |
| -0.0123 | 0.0013 | 8.26E-22 | 3,037,440 | primary | -          |
| 0.0119  | 0.0016 | 2.15E-13 | 3,020,170 | primary | -          |
| -0.0420 | 0.0063 | 2.59E-11 | 2,983,830 | primary | -          |
| -0.0211 | 0.0035 | 9.95E-10 | 3,013,170 | primary | -          |
| 0.0089  | 0.0011 | 7.21E-16 | 3,037,470 | primary | -          |
| 0.0117  | 0.0013 | 7.73E-19 | 3,037,470 | primary | -          |
| 0.0112  | 0.0019 | 3.51E-09 | 3,002,220 | primary | -          |
| 0.0112  | 0.0014 | 7.45E-15 | 3,037,480 | primary | -          |
| 0.0064  | 0.0012 | 4.61E-08 | 3,021,670 | primary | -          |
| 0.0099  | 0.0012 | 2.97E-17 | 3,037,440 | primary | -          |
| 0.0284  | 0.0029 | 2.59E-23 | 3,035,490 | primary | -          |
| -0.0113 | 0.0014 | 3.39E-16 | 3,035,730 | primary | -          |
| -0.0154 | 0.0012 | 8.93E-41 | 3,037,310 | primary | -          |
| 0.0107  | 0.0012 | 3.82E-18 | 3,037,390 | primary | -          |
| -0.0119 | 0.0013 | 7.92E-20 | 2,315,730 | primary | -          |
| -0.0097 | 0.0014 | 2.24E-12 | 2,954,670 | primary | -          |

|         |        |          |           |           |            |
|---------|--------|----------|-----------|-----------|------------|
| -0.0131 | 0.0011 | 9.98E-33 | 3,036,830 | primary   | -          |
| -0.0099 | 0.0014 | 5.20E-12 | 3,029,930 | primary   | -          |
| -0.0172 | 0.0021 | 9.82E-17 | 3,029,830 | primary   | -          |
| 0.0078  | 0.0013 | 1.69E-09 | 3,037,490 | primary   | -          |
| -0.0209 | 0.0020 | 3.77E-26 | 3,034,950 | primary   | -          |
| -0.0067 | 0.0011 | 4.40E-10 | 3,037,500 | primary   | -          |
| -0.0073 | 0.0012 | 1.32E-09 | 3,035,710 | primary   | -          |
| -0.0098 | 0.0017 | 2.50E-09 | 3,035,790 | primary   | -          |
| 0.0395  | 0.0044 | 1.66E-19 | 2,945,060 | primary   | -          |
| 0.0075  | 0.0011 | 4.03E-12 | 3,035,680 | primary   | -          |
| -0.0158 | 0.0022 | 1.60E-12 | 3,007,290 | primary   | -          |
| 0.0080  | 0.0013 | 1.88E-10 | 3,037,490 | primary   | -          |
| 0.0118  | 0.0017 | 1.00E-11 | 3,035,740 | primary   | -          |
| 0.0068  | 0.0011 | 6.71E-10 | 3,023,510 | primary   | -          |
| 0.0068  | 0.0012 | 9.77E-09 | 3,035,780 | primary   | -          |
| -0.0081 | 0.0011 | 3.69E-13 | 3,033,310 | primary   | -          |
| 0.0167  | 0.0022 | 3.82E-14 | 3,037,470 | primary   | -          |
| -0.0136 | 0.0024 | 1.51E-08 | 3,037,480 | primary   | -          |
| -0.0102 | 0.0014 | 6.02E-14 | 3,037,370 | secondary | N/A        |
| 0.0112  | 0.0012 | 7.49E-21 | 3,035,710 | primary   | rs62182444 |
| 0.0070  | 0.0011 | 6.50E-10 | 3,037,450 | primary   | -          |
| 0.0084  | 0.0014 | 4.39E-09 | 3,037,420 | secondary | N/A        |
| 0.0092  | 0.0016 | 3.36E-09 | 3,037,430 | primary   | rs3754740  |
| -0.0096 | 0.0012 | 5.39E-16 | 3,019,280 | primary   | -          |
| 0.0110  | 0.0011 | 3.03E-25 | 3,027,300 | primary   | -          |
| -0.0182 | 0.0030 | 6.64E-10 | 2,985,980 | primary   | -          |
| 0.0076  | 0.0012 | 1.73E-10 | 3,037,470 | primary   | -          |
| -0.0305 | 0.0022 | 1.55E-42 | 3,036,870 | primary   | -          |
| 0.0088  | 0.0011 | 1.41E-15 | 3,035,770 | primary   | -          |
| 0.0147  | 0.0017 | 6.34E-18 | 3,037,450 | primary   | -          |
| -0.0077 | 0.0011 | 2.27E-12 | 3,037,470 | primary   | -          |
| -0.0249 | 0.0027 | 2.86E-20 | 3,022,130 | primary   | -          |
| -0.0130 | 0.0018 | 2.49E-13 | 3,035,770 | primary   | -          |
| -0.0109 | 0.0018 | 1.10E-09 | 3,021,680 | primary   | -          |
| -0.0078 | 0.0014 | 1.57E-08 | 3,037,480 | primary   | -          |
| 0.0114  | 0.0011 | 1.95E-23 | 3,035,710 | primary   | -          |
| 0.0124  | 0.0017 | 3.77E-13 | 3,036,950 | primary   | -          |
| 0.0074  | 0.0011 | 1.58E-11 | 3,037,440 | primary   | -          |
| 0.0119  | 0.0020 | 1.73E-09 | 3,037,480 | primary   | -          |
| -0.0127 | 0.0018 | 6.11E-12 | 3,015,840 | primary   | -          |
| 0.0210  | 0.0020 | 1.05E-24 | 3,013,470 | primary   | -          |
| 0.0105  | 0.0016 | 1.02E-10 | 3,021,110 | primary   | -          |
| -0.0276 | 0.0031 | 2.62E-19 | 3,023,480 | primary   | -          |
| -0.0066 | 0.0011 | 3.75E-10 | 3,037,480 | primary   | -          |
| -0.0101 | 0.0015 | 5.36E-12 | 3,037,490 | primary   | -          |
| -0.0106 | 0.0015 | 4.46E-13 | 3,037,460 | primary   | -          |
| -0.0066 | 0.0011 | 1.98E-09 | 3,037,500 | primary   | -          |
| 0.0148  | 0.0021 | 1.53E-12 | 3,033,310 | secondary | N/A        |

|         |        |          |           |         |            |
|---------|--------|----------|-----------|---------|------------|
| 0.0086  | 0.0012 | 1.17E-13 | 3,037,440 | primary | rs75142797 |
| -0.0094 | 0.0011 | 3.37E-18 | 3,037,440 | primary | -          |
| 0.0102  | 0.0012 | 1.68E-18 | 3,000,800 | primary | -          |
| -0.0072 | 0.0011 | 3.66E-11 | 3,037,460 | primary | -          |
| 0.0091  | 0.0011 | 9.96E-18 | 3,023,180 | primary | -          |
| -0.0131 | 0.0011 | 9.61E-32 | 3,022,370 | primary | -          |
| 0.0075  | 0.0012 | 3.84E-10 | 3,037,430 | primary | -          |
| -0.0169 | 0.0023 | 3.80E-13 | 2,925,720 | primary | -          |
| 0.0097  | 0.0013 | 1.54E-13 | 3,033,330 | primary | -          |
| -0.0088 | 0.0015 | 8.92E-09 | 3,035,640 | primary | -          |
| 0.0072  | 0.0011 | 5.70E-11 | 3,037,500 | primary | -          |
| -0.0396 | 0.0062 | 1.38E-10 | 2,843,090 | primary | -          |
| 0.0075  | 0.0011 | 6.22E-12 | 3,035,690 | primary | -          |
| -0.0161 | 0.0011 | 2.47E-50 | 3,033,750 | primary | -          |
| 0.0081  | 0.0011 | 3.11E-13 | 3,035,700 | primary | -          |
| -0.0125 | 0.0014 | 2.01E-18 | 2,996,510 | primary | -          |
| -0.0098 | 0.0011 | 1.34E-19 | 3,037,430 | primary | -          |
| 0.0171  | 0.0016 | 1.15E-26 | 3,035,700 | primary | -          |
| -0.0108 | 0.0017 | 4.08E-10 | 3,037,480 | primary | -          |
| -0.0168 | 0.0028 | 1.26E-09 | 3,035,090 | primary | -          |
| -0.0128 | 0.0022 | 3.33E-09 | 2,996,870 | primary | -          |
| -0.0113 | 0.0015 | 2.89E-14 | 3,035,770 | primary | -          |
| -0.0136 | 0.0014 | 1.14E-21 | 3,032,970 | primary | -          |
| 0.0074  | 0.0013 | 4.70E-09 | 3,037,460 | primary | -          |
| 0.0089  | 0.0011 | 8.52E-16 | 3,035,780 | primary | -          |
| -0.0082 | 0.0011 | 1.30E-14 | 3,034,190 | primary | -          |
| -0.0117 | 0.0011 | 1.93E-28 | 3,037,430 | primary | -          |
| 0.0108  | 0.0011 | 5.69E-21 | 3,037,450 | primary | -          |
| -0.0143 | 0.0012 | 5.25E-35 | 2,985,950 | primary | -          |
| 0.0121  | 0.0022 | 2.50E-08 | 3,036,580 | primary | -          |
| 0.0094  | 0.0012 | 1.93E-15 | 3,037,490 | primary | -          |
| -0.0107 | 0.0011 | 4.59E-24 | 3,020,930 | primary | -          |
| 0.0499  | 0.0080 | 4.73E-10 | 2,880,770 | primary | -          |
| 0.0094  | 0.0016 | 2.97E-09 | 3,037,410 | primary | -          |
| -0.0091 | 0.0011 | 4.44E-16 | 3,037,420 | primary | -          |
| -0.0081 | 0.0013 | 5.65E-10 | 3,035,790 | primary | -          |
| -0.0061 | 0.0011 | 1.51E-08 | 3,024,920 | primary | -          |
| -0.0065 | 0.0011 | 2.67E-09 | 3,019,240 | primary | -          |
| -0.0093 | 0.0014 | 8.70E-11 | 3,037,470 | primary | -          |
| -0.0316 | 0.0037 | 3.40E-17 | 2,920,580 | primary | -          |
| -0.0073 | 0.0011 | 5.23E-11 | 3,035,260 | primary | -          |
| 0.0076  | 0.0011 | 6.51E-12 | 3,035,760 | primary | -          |
| -0.0060 | 0.0011 | 1.43E-08 | 2,986,590 | primary | -          |
| 0.0078  | 0.0011 | 1.60E-13 | 2,999,100 | primary | -          |
| -0.0086 | 0.0013 | 9.23E-12 | 3,037,470 | primary | -          |
| 0.0106  | 0.0011 | 5.49E-21 | 3,037,410 | primary | -          |
| 0.0164  | 0.0017 | 1.84E-21 | 3,024,870 | primary | -          |
| 0.0066  | 0.0011 | 8.34E-10 | 3,037,500 | primary | -          |



|         |        |          |           |           |            |
|---------|--------|----------|-----------|-----------|------------|
| -0.0150 | 0.0014 | 2.22E-27 | 3,024,860 | primary   | -          |
| 0.0089  | 0.0012 | 1.28E-14 | 3,033,270 | primary   | -          |
| 0.0129  | 0.0011 | 5.97E-31 | 3,037,370 | primary   | -          |
| 0.0127  | 0.0015 | 2.20E-16 | 3,035,730 | primary   | -          |
| 0.0085  | 0.0015 | 3.77E-08 | 3,037,480 | primary   | -          |
| -0.0146 | 0.0023 | 3.38E-10 | 3,037,470 | primary   | -          |
| 0.0115  | 0.0016 | 6.22E-13 | 3,023,220 | primary   | -          |
| 0.0085  | 0.0012 | 3.55E-13 | 3,036,130 | primary   | -          |
| -0.0093 | 0.0014 | 8.03E-11 | 3,019,850 | secondary | N/A        |
| -0.0112 | 0.0014 | 3.88E-16 | 3,035,960 | primary   | rs13007783 |
| 0.0101  | 0.0012 | 2.42E-16 | 3,032,500 | primary   | -          |
| 0.0081  | 0.0011 | 1.72E-14 | 3,028,320 | primary   | -          |
| -0.0066 | 0.0011 | 4.74E-10 | 3,025,140 | primary   | -          |
| -0.0103 | 0.0014 | 1.36E-13 | 3,022,350 | primary   | -          |
| 0.0063  | 0.0011 | 5.00E-09 | 3,036,650 | primary   | -          |
| -0.0091 | 0.0015 | 6.94E-10 | 3,015,340 | primary   | -          |
| 0.0135  | 0.0017 | 5.83E-16 | 3,003,650 | primary   | -          |
| -0.0090 | 0.0013 | 9.39E-13 | 3,028,760 | primary   | -          |
| -0.0067 | 0.0011 | 1.97E-10 | 3,036,150 | primary   | -          |
| 0.0078  | 0.0011 | 9.94E-14 | 3,037,450 | primary   | -          |
| -0.0084 | 0.0014 | 1.16E-09 | 3,035,730 | primary   | -          |
| -0.0110 | 0.0013 | 2.21E-16 | 3,037,470 | primary   | -          |
| 0.0071  | 0.0011 | 5.23E-10 | 3,023,220 | primary   | -          |
| -0.0088 | 0.0011 | 6.82E-15 | 3,037,450 | primary   | -          |
| -0.0078 | 0.0012 | 4.62E-10 | 3,037,500 | primary   | -          |
| -0.0092 | 0.0011 | 6.68E-17 | 3,037,430 | primary   | -          |
| -0.0073 | 0.0011 | 1.55E-11 | 3,037,470 | primary   | -          |
| 0.0303  | 0.0045 | 9.66E-12 | 2,941,510 | primary   | -          |
| -0.0092 | 0.0011 | 1.04E-17 | 3,037,440 | primary   | -          |
| 0.0106  | 0.0011 | 1.29E-20 | 3,033,800 | primary   | -          |
| 0.0095  | 0.0014 | 6.83E-12 | 3,035,510 | primary   | -          |
| -0.0104 | 0.0013 | 9.28E-15 | 2,951,480 | primary   | -          |
| 0.0083  | 0.0012 | 2.91E-11 | 3,035,780 | primary   | -          |
| -0.0275 | 0.0035 | 3.48E-15 | 3,027,370 | primary   | -          |
| 0.0065  | 0.0011 | 7.13E-10 | 3,022,500 | primary   | -          |
| 0.0082  | 0.0011 | 9.06E-13 | 3,037,430 | primary   | -          |
| -0.0094 | 0.0014 | 4.50E-11 | 3,037,420 | primary   | -          |
| 0.0128  | 0.0023 | 1.43E-08 | 2,972,000 | primary   | -          |
| 0.0345  | 0.0046 | 8.13E-14 | 2,798,850 | primary   | -          |
| -0.0092 | 0.0012 | 1.14E-13 | 3,035,710 | primary   | -          |
| -0.0121 | 0.0012 | 1.08E-24 | 3,037,440 | primary   | -          |
| 0.0093  | 0.0011 | 1.96E-16 | 3,036,850 | primary   | -          |
| -0.0069 | 0.0011 | 1.12E-09 | 3,035,750 | primary   | -          |
| -0.0077 | 0.0011 | 8.93E-13 | 3,037,480 | primary   | -          |
| 0.0085  | 0.0012 | 1.51E-12 | 3,035,730 | primary   | -          |
| -0.0089 | 0.0012 | 3.14E-14 | 3,023,240 | primary   | -          |
| 0.0089  | 0.0013 | 8.59E-12 | 3,022,470 | primary   | -          |
| -0.0131 | 0.0014 | 8.37E-22 | 3,037,420 | primary   | -          |

|         |        |           |           |           |                                 |
|---------|--------|-----------|-----------|-----------|---------------------------------|
| -0.0090 | 0.0013 | 8.03E-13  | 3,037,480 | primary   | -                               |
| 0.0079  | 0.0011 | 1.32E-13  | 3,037,460 | primary   | -                               |
| -0.0150 | 0.0020 | 1.23E-13  | 3,023,210 | primary   | -                               |
| 0.0079  | 0.0011 | 4.90E-14  | 3,037,460 | primary   | -                               |
| 0.0071  | 0.0011 | 1.50E-11  | 3,037,490 | primary   | -                               |
| 0.0139  | 0.0015 | 1.13E-19  | 3,031,550 | primary   | -                               |
| -0.0143 | 0.0018 | 5.92E-15  | 3,035,370 | primary   | -                               |
| -0.0107 | 0.0012 | 9.88E-19  | 3,024,880 | primary   | -                               |
| -0.0109 | 0.0012 | 2.00E-19  | 3,037,460 | primary   | -                               |
| -0.0092 | 0.0015 | 6.45E-10  | 3,035,760 | primary   | -                               |
| 0.0086  | 0.0012 | 2.17E-12  | 3,037,470 | primary   | -                               |
| 0.0361  | 0.0052 | 4.72E-12  | 2,971,510 | primary   | -                               |
| -0.0114 | 0.0011 | 7.89E-26  | 3,036,840 | primary   | -                               |
| 0.0091  | 0.0013 | 4.54E-12  | 3,037,480 | primary   | -                               |
| -0.0073 | 0.0011 | 1.02E-10  | 3,037,500 | primary   | -                               |
| -0.0232 | 0.0036 | 6.28E-11  | 2,995,050 | primary   | -                               |
| -0.0142 | 0.0016 | 5.35E-19  | 3,035,760 | primary   | -                               |
| -0.0176 | 0.0011 | 2.27E-54  | 3,024,850 | primary   | -                               |
| 0.0115  | 0.0019 | 7.80E-10  | 3,003,880 | secondary | N/A                             |
| 0.0165  | 0.0016 | 7.39E-24  | 3,037,150 | primary   | -                               |
| 0.0202  | 0.0014 | 1.54E-45  | 2,989,820 | primary   | rs73078367,rs7627910            |
| -0.0276 | 0.0026 | 3.00E-26  | 2,951,870 | primary   | -                               |
| 0.0147  | 0.0013 | 7.37E-32  | 3,035,170 | secondary | N/A                             |
| -0.0151 | 0.0019 | 1.69E-15  | 2,489,320 | primary   | -                               |
| 0.0091  | 0.0012 | 3.48E-14  | 3,024,920 | primary   | -                               |
| -0.0092 | 0.0012 | 1.06E-13  | 2,999,120 | primary   | -                               |
| 0.0104  | 0.0011 | 1.75E-21  | 3,035,750 | primary   | -                               |
| -0.1056 | 0.0183 | 8.23E-09  | 2,272,200 | primary   | -                               |
| 0.0117  | 0.0011 | 1.13E-24  | 3,037,410 | primary   | -                               |
| -0.0093 | 0.0013 | 5.08E-13  | 3,037,470 | primary   | -                               |
| 0.0071  | 0.0011 | 7.38E-11  | 3,037,480 | primary   | -                               |
| -0.0089 | 0.0011 | 4.06E-16  | 3,034,990 | primary   | -                               |
| 0.0087  | 0.0013 | 1.63E-11  | 3,024,940 | primary   | -                               |
| -0.0832 | 0.0034 | 8.97E-131 | 3,037,440 | primary   | rs59760856,rs9822855,rs13071861 |
| -0.0811 | 0.0034 | 4.76E-129 | 3,035,820 | secondary | N/A                             |
| -0.0793 | 0.0034 | 8.97E-120 | 3,037,520 | secondary | N/A                             |
| 0.0155  | 0.0018 | 2.18E-18  | 3,035,010 | secondary | N/A                             |
| 0.0068  | 0.0011 | 4.37E-10  | 3,037,450 | primary   | -                               |
| 0.0106  | 0.0013 | 1.25E-16  | 3,021,950 | primary   | -                               |
| -0.0101 | 0.0015 | 1.59E-11  | 3,015,950 | primary   | -                               |
| -0.0149 | 0.0024 | 9.03E-10  | 3,019,570 | primary   | -                               |
| 0.0114  | 0.0012 | 4.86E-23  | 3,022,470 | primary   | -                               |
| -0.0100 | 0.0016 | 2.27E-10  | 3,019,100 | primary   | -                               |
| 0.0080  | 0.0013 | 7.98E-10  | 2,999,160 | primary   | -                               |
| 0.0122  | 0.0017 | 6.79E-13  | 3,037,440 | primary   | -                               |
| -0.0090 | 0.0011 | 2.25E-17  | 3,035,740 | primary   | -                               |
| -0.0117 | 0.0016 | 1.07E-13  | 2,989,960 | primary   | -                               |
| -0.0096 | 0.0014 | 4.09E-12  | 3,024,890 | primary   | -                               |

|         |        |          |           |           |            |
|---------|--------|----------|-----------|-----------|------------|
| -0.0187 | 0.0021 | 6.32E-20 | 3,024,010 | primary   | -          |
| -0.0078 | 0.0011 | 2.43E-13 | 3,037,490 | primary   | -          |
| 0.0104  | 0.0011 | 1.38E-20 | 3,016,600 | primary   | -          |
| 0.0076  | 0.0011 | 1.43E-12 | 3,036,910 | primary   | -          |
| -0.0197 | 0.0023 | 2.18E-17 | 3,013,110 | primary   | -          |
| 0.0084  | 0.0012 | 4.08E-12 | 3,037,430 | primary   | -          |
| -0.0069 | 0.0012 | 9.37E-09 | 3,037,480 | primary   | -          |
| -0.0168 | 0.0027 | 7.93E-10 | 2,995,550 | primary   | -          |
| -0.0120 | 0.0011 | 2.40E-26 | 3,037,410 | primary   | -          |
| -0.0094 | 0.0011 | 1.57E-16 | 3,024,890 | primary   | -          |
| -0.0179 | 0.0011 | 1.14E-64 | 3,037,260 | primary   | -          |
| 0.0061  | 0.0011 | 6.21E-09 | 3,037,460 | primary   | -          |
| -0.0124 | 0.0013 | 2.59E-21 | 3,037,470 | primary   | -          |
| -0.0095 | 0.0011 | 1.33E-16 | 2,713,290 | primary   | -          |
| 0.0094  | 0.0015 | 5.43E-10 | 3,035,750 | primary   | -          |
| -0.0114 | 0.0014 | 6.21E-16 | 3,024,890 | primary   | -          |
| -0.0118 | 0.0013 | 6.17E-20 | 3,024,870 | primary   | -          |
| -0.0060 | 0.0011 | 1.88E-08 | 3,037,500 | primary   | -          |
| 0.0095  | 0.0011 | 5.89E-19 | 3,008,410 | primary   | -          |
| -0.0113 | 0.0015 | 2.72E-13 | 2,990,170 | primary   | -          |
| -0.0082 | 0.0011 | 3.28E-14 | 3,024,910 | primary   | -          |
| -0.0110 | 0.0012 | 8.26E-20 | 3,035,170 | primary   | -          |
| -0.0070 | 0.0011 | 1.41E-10 | 3,035,740 | primary   | -          |
| 0.0088  | 0.0011 | 3.73E-15 | 3,000,810 | primary   | -          |
| -0.0063 | 0.0011 | 6.27E-09 | 3,037,440 | primary   | -          |
| -0.0098 | 0.0016 | 3.53E-10 | 3,034,080 | primary   | -          |
| -0.0070 | 0.0012 | 1.79E-08 | 3,037,400 | secondary | N/A        |
| -0.0088 | 0.0014 | 1.32E-10 | 3,035,700 | primary   | rs11711322 |
| 0.0094  | 0.0011 | 2.05E-18 | 3,037,480 | primary   | -          |
| 0.0102  | 0.0011 | 7.65E-21 | 3,037,400 | primary   | -          |
| -0.0104 | 0.0017 | 1.28E-09 | 3,001,770 | secondary | N/A        |
| -0.0108 | 0.0012 | 1.61E-18 | 2,272,170 | primary   | -          |
| -0.0180 | 0.0012 | 1.12E-47 | 3,000,660 | primary   | rs67379620 |
| -0.0125 | 0.0017 | 4.32E-13 | 3,037,440 | primary   | -          |
| 0.0079  | 0.0011 | 1.30E-13 | 3,033,970 | primary   | -          |
| 0.0065  | 0.0011 | 1.02E-09 | 2,996,460 | primary   | -          |
| -0.0099 | 0.0011 | 9.88E-21 | 3,035,710 | primary   | -          |
| -0.0140 | 0.0012 | 1.11E-29 | 3,037,400 | primary   | -          |
| 0.0092  | 0.0011 | 2.12E-17 | 3,036,940 | primary   | -          |
| 0.0120  | 0.0017 | 3.82E-13 | 3,016,630 | primary   | -          |
| -0.0139 | 0.0011 | 6.88E-35 | 3,037,430 | primary   | -          |
| 0.0091  | 0.0011 | 1.16E-17 | 3,035,750 | primary   | -          |
| 0.0096  | 0.0014 | 2.95E-12 | 3,037,440 | primary   | -          |
| -0.0378 | 0.0058 | 5.62E-11 | 2,949,810 | primary   | -          |
| -0.0106 | 0.0011 | 2.66E-22 | 3,037,420 | primary   | -          |
| -0.0170 | 0.0022 | 4.02E-14 | 3,019,110 | primary   | -          |
| -0.0136 | 0.0012 | 9.49E-28 | 3,037,400 | primary   | -          |
| 0.0119  | 0.0013 | 4.41E-20 | 3,037,460 | primary   | -          |

|         |        |          |           |           |           |
|---------|--------|----------|-----------|-----------|-----------|
| -0.0279 | 0.0046 | 1.35E-09 | 2,973,590 | primary   | -         |
| -0.0516 | 0.0073 | 1.28E-12 | 2,914,900 | primary   | -         |
| 0.0077  | 0.0013 | 2.59E-09 | 2,969,910 | primary   | -         |
| 0.0088  | 0.0014 | 2.48E-10 | 3,033,360 | primary   | -         |
| -0.0120 | 0.0012 | 5.22E-25 | 3,037,400 | primary   | -         |
| 0.0084  | 0.0011 | 2.43E-15 | 2,983,130 | primary   | -         |
| 0.0079  | 0.0011 | 3.34E-12 | 3,035,660 | primary   | -         |
| -0.0068 | 0.0011 | 1.84E-10 | 3,035,670 | primary   | -         |
| 0.0071  | 0.0012 | 9.04E-10 | 3,035,660 | primary   | -         |
| -0.0139 | 0.0012 | 3.57E-30 | 3,035,600 | primary   | -         |
| 0.0083  | 0.0012 | 7.22E-12 | 3,035,670 | primary   | -         |
| -0.0068 | 0.0012 | 5.91E-09 | 3,033,950 | secondary | N/A       |
| 0.0104  | 0.0012 | 2.55E-17 | 3,035,730 | primary   | rs6438720 |
| -0.0133 | 0.0012 | 2.98E-30 | 3,036,850 | primary   | -         |
| -0.0066 | 0.0011 | 5.40E-10 | 3,024,960 | primary   | -         |
| 0.0090  | 0.0013 | 3.42E-12 | 3,037,440 | primary   | -         |
| 0.0095  | 0.0014 | 1.85E-12 | 3,035,720 | primary   | -         |
| 0.0195  | 0.0014 | 9.09E-42 | 3,037,300 | primary   | -         |
| -0.0152 | 0.0022 | 1.53E-12 | 3,034,070 | primary   | -         |
| 0.0088  | 0.0015 | 1.19E-09 | 3,001,980 | primary   | -         |
| -0.0084 | 0.0011 | 5.93E-15 | 3,037,440 | primary   | -         |
| -0.0091 | 0.0011 | 1.37E-17 | 3,037,430 | primary   | -         |
| -0.0088 | 0.0011 | 3.09E-16 | 3,037,420 | primary   | -         |
| -0.0075 | 0.0011 | 1.99E-11 | 3,037,470 | primary   | -         |
| -0.0086 | 0.0012 | 1.86E-13 | 3,037,470 | primary   | -         |
| 0.0093  | 0.0011 | 1.98E-18 | 3,037,440 | primary   | -         |
| -0.0136 | 0.0019 | 9.84E-13 | 3,036,920 | primary   | -         |
| 0.0100  | 0.0014 | 2.05E-13 | 3,037,440 | primary   | -         |
| 0.0062  | 0.0011 | 6.88E-09 | 3,037,520 | primary   | -         |
| -0.0095 | 0.0011 | 8.04E-19 | 3,037,470 | primary   | -         |
| -0.0107 | 0.0011 | 6.45E-24 | 3,035,700 | primary   | -         |
| -0.0081 | 0.0011 | 1.45E-14 | 3,036,900 | primary   | -         |
| 0.0064  | 0.0011 | 1.42E-09 | 3,035,040 | primary   | -         |
| -0.0077 | 0.0011 | 2.30E-13 | 3,033,260 | primary   | -         |
| -0.0131 | 0.0011 | 1.93E-34 | 3,000,760 | primary   | -         |
| 0.0077  | 0.0012 | 2.89E-10 | 3,037,490 | primary   | -         |
| -0.0288 | 0.0040 | 3.47E-13 | 2,975,110 | primary   | -         |
| 0.0089  | 0.0012 | 1.08E-13 | 3,037,450 | primary   | -         |
| -0.0068 | 0.0011 | 2.23E-09 | 3,034,080 | primary   | -         |
| -0.0096 | 0.0013 | 7.80E-14 | 3,037,450 | primary   | -         |
| 0.0114  | 0.0012 | 1.80E-21 | 3,035,740 | primary   | rs6805849 |
| -0.0101 | 0.0015 | 1.62E-11 | 3,037,480 | secondary | N/A       |
| 0.0095  | 0.0013 | 1.25E-12 | 3,032,430 | primary   | -         |
| 0.0100  | 0.0013 | 1.06E-14 | 3,033,190 | primary   | -         |
| 0.0073  | 0.0011 | 6.24E-11 | 3,035,750 | primary   | -         |
| 0.0104  | 0.0011 | 1.69E-20 | 3,037,420 | primary   | -         |
| -0.0164 | 0.0013 | 1.34E-34 | 3,037,400 | primary   | -         |
| 0.0085  | 0.0015 | 6.44E-09 | 3,035,030 | primary   | -         |

|         |        |          |           |         |   |
|---------|--------|----------|-----------|---------|---|
| 0.0101  | 0.0016 | 2.03E-10 | 3,023,200 | primary | - |
| 0.0107  | 0.0015 | 3.65E-13 | 3,037,460 | primary | - |
| 0.0071  | 0.0011 | 3.11E-11 | 3,035,740 | primary | - |
| 0.0074  | 0.0012 | 3.25E-10 | 3,035,760 | primary | - |
| 0.0085  | 0.0011 | 2.47E-15 | 3,037,480 | primary | - |
| 0.0066  | 0.0011 | 3.39E-10 | 3,032,640 | primary | - |
| 0.0093  | 0.0011 | 2.41E-18 | 3,037,440 | primary | - |
| 0.0139  | 0.0012 | 4.11E-30 | 3,037,390 | primary | - |
| -0.0096 | 0.0012 | 5.44E-16 | 3,037,470 | primary | - |
| 0.0065  | 0.0011 | 1.78E-09 | 3,037,480 | primary | - |
| 0.0077  | 0.0011 | 1.67E-12 | 3,022,520 | primary | - |
| -0.0078 | 0.0012 | 1.82E-11 | 3,037,500 | primary | - |
| -0.0172 | 0.0015 | 2.19E-31 | 3,037,390 | primary | - |
| -0.0073 | 0.0011 | 8.36E-12 | 3,029,120 | primary | - |
| 0.0101  | 0.0011 | 1.72E-19 | 3,037,420 | primary | - |
| 0.0115  | 0.0012 | 1.99E-20 | 3,037,440 | primary | - |
| -0.0118 | 0.0016 | 5.96E-13 | 3,022,080 | primary | - |
| 0.0064  | 0.0011 | 1.20E-09 | 3,034,220 | primary | - |
| -0.0117 | 0.0012 | 2.03E-21 | 3,023,150 | primary | - |
| 0.0081  | 0.0014 | 6.27E-09 | 3,037,490 | primary | - |
| 0.0120  | 0.0016 | 2.62E-13 | 3,035,740 | primary | - |
| -0.0066 | 0.0011 | 2.41E-09 | 2,985,790 | primary | - |
| 0.0068  | 0.0011 | 1.14E-10 | 3,036,950 | primary | - |
| -0.0072 | 0.0012 | 3.33E-09 | 3,015,240 | primary | - |
| -0.0093 | 0.0011 | 1.46E-18 | 3,037,430 | primary | - |
| 0.0061  | 0.0011 | 1.20E-08 | 3,035,780 | primary | - |
| 0.0126  | 0.0014 | 6.67E-20 | 3,037,450 | primary | - |
| 0.0109  | 0.0017 | 1.80E-10 | 2,944,900 | primary | - |
| -0.0111 | 0.0019 | 4.02E-09 | 3,028,880 | primary | - |
| -0.0078 | 0.0013 | 2.42E-09 | 2,947,550 | primary | - |
| -0.0086 | 0.0011 | 6.59E-15 | 2,995,310 | primary | - |
| -0.0093 | 0.0013 | 2.07E-13 | 3,021,420 | primary | - |
| 0.0152  | 0.0013 | 4.49E-33 | 3,021,410 | primary | - |
| -0.0161 | 0.0021 | 1.62E-14 | 3,033,610 | primary | - |
| -0.0077 | 0.0012 | 2.67E-10 | 3,011,760 | primary | - |
| 0.0088  | 0.0012 | 1.71E-12 | 3,034,050 | primary | - |
| 0.0058  | 0.0011 | 3.09E-08 | 3,035,750 | primary | - |
| -0.0151 | 0.0011 | 3.17E-42 | 3,037,340 | primary | - |
| -0.0064 | 0.0011 | 1.42E-09 | 3,037,480 | primary | - |
| 0.0089  | 0.0014 | 5.03E-10 | 3,035,750 | primary | - |
| 0.0072  | 0.0012 | 5.86E-10 | 3,035,770 | primary | - |
| -0.0072 | 0.0012 | 7.19E-10 | 3,033,330 | primary | - |
| 0.0062  | 0.0011 | 4.68E-09 | 3,035,560 | primary | - |
| 0.0063  | 0.0011 | 2.92E-09 | 3,037,440 | primary | - |
| 0.0088  | 0.0012 | 1.90E-14 | 3,037,440 | primary | - |
| -0.0070 | 0.0011 | 1.05E-09 | 3,023,210 | primary | - |
| 0.0077  | 0.0013 | 7.73E-09 | 3,035,770 | primary | - |
| 0.0065  | 0.0011 | 1.28E-09 | 3,037,440 | primary | - |

|         |        |          |           |           |            |
|---------|--------|----------|-----------|-----------|------------|
| -0.0061 | 0.0011 | 3.69E-08 | 3,037,490 | primary   | -          |
| 0.0062  | 0.0011 | 6.25E-09 | 3,037,480 | primary   | -          |
| 0.0067  | 0.0012 | 1.24E-08 | 3,037,480 | primary   | -          |
| -0.0089 | 0.0011 | 9.17E-16 | 3,035,740 | primary   | -          |
| 0.0079  | 0.0011 | 6.39E-14 | 3,036,890 | primary   | -          |
| -0.0094 | 0.0012 | 5.07E-16 | 3,037,400 | primary   | -          |
| 0.0060  | 0.0011 | 1.52E-08 | 3,035,790 | primary   | -          |
| 0.0278  | 0.0029 | 1.08E-21 | 3,035,040 | secondary | N/A        |
| 0.0117  | 0.0016 | 5.41E-14 | 3,037,400 | primary   | -          |
| 0.0331  | 0.0028 | 5.41E-33 | 3,037,420 | primary   | rs73242122 |
| -0.0090 | 0.0012 | 2.54E-14 | 3,037,440 | primary   | -          |
| 0.0070  | 0.0011 | 5.76E-11 | 3,024,950 | primary   | -          |
| 0.0089  | 0.0016 | 1.45E-08 | 3,037,450 | primary   | -          |
| 0.0131  | 0.0011 | 4.63E-34 | 3,023,080 | primary   | -          |
| -0.0119 | 0.0014 | 2.33E-17 | 3,024,880 | primary   | -          |
| -0.0154 | 0.0026 | 5.11E-09 | 3,004,320 | primary   | -          |
| -0.0066 | 0.0011 | 6.63E-10 | 3,036,980 | primary   | -          |
| -0.0090 | 0.0011 | 1.47E-17 | 3,037,420 | primary   | -          |
| -0.0064 | 0.0011 | 1.80E-09 | 3,037,470 | primary   | -          |
| -0.0076 | 0.0011 | 5.13E-13 | 3,037,420 | primary   | -          |
| 0.0131  | 0.0013 | 6.20E-25 | 2,861,380 | primary   | -          |
| -0.0090 | 0.0013 | 2.95E-12 | 3,037,490 | primary   | -          |
| 0.0175  | 0.0028 | 2.79E-10 | 2,999,080 | primary   | -          |
| -0.0073 | 0.0011 | 5.04E-11 | 3,037,400 | primary   | -          |
| 0.0151  | 0.0015 | 1.67E-24 | 3,037,380 | primary   | -          |
| -0.0083 | 0.0011 | 1.21E-13 | 3,037,490 | primary   | -          |
| -0.0131 | 0.0013 | 2.68E-23 | 3,037,410 | primary   | -          |
| 0.0088  | 0.0011 | 9.90E-15 | 3,037,420 | primary   | -          |
| 0.0068  | 0.0012 | 1.25E-08 | 3,036,910 | primary   | -          |
| 0.0063  | 0.0011 | 8.15E-09 | 3,037,450 | primary   | -          |
| 0.0078  | 0.0012 | 6.88E-11 | 3,035,730 | primary   | -          |
| -0.0075 | 0.0011 | 5.38E-12 | 3,035,760 | primary   | -          |
| 0.0109  | 0.0011 | 6.90E-25 | 3,037,400 | primary   | -          |
| 0.0120  | 0.0012 | 9.11E-23 | 2,272,110 | primary   | -          |
| 0.0351  | 0.0062 | 1.43E-08 | 2,823,100 | primary   | -          |
| 0.0084  | 0.0011 | 2.89E-15 | 3,037,430 | primary   | -          |
| -0.0117 | 0.0016 | 6.37E-13 | 3,027,030 | primary   | -          |
| 0.0084  | 0.0014 | 1.21E-09 | 3,019,040 | primary   | -          |
| 0.0085  | 0.0011 | 6.98E-15 | 3,020,750 | primary   | -          |
| -0.0068 | 0.0011 | 4.15E-10 | 3,037,450 | primary   | -          |
| 0.0117  | 0.0017 | 1.46E-12 | 3,017,420 | primary   | -          |
| 0.0070  | 0.0011 | 8.76E-11 | 3,035,520 | primary   | -          |
| -0.0089 | 0.0016 | 1.09E-08 | 3,037,460 | primary   | -          |
| -0.0069 | 0.0011 | 2.17E-10 | 3,011,200 | primary   | -          |
| -0.0084 | 0.0011 | 4.14E-15 | 3,037,440 | primary   | -          |
| -0.0090 | 0.0016 | 1.51E-08 | 3,037,490 | primary   | -          |
| 0.0094  | 0.0012 | 3.54E-16 | 3,035,750 | primary   | -          |
| -0.0206 | 0.0036 | 8.35E-09 | 3,024,900 | primary   | -          |

|         |        |          |           |         |   |
|---------|--------|----------|-----------|---------|---|
| 0.0106  | 0.0018 | 8.23E-09 | 2,991,730 | primary | - |
| -0.0081 | 0.0011 | 5.78E-14 | 3,024,920 | primary | - |
| 0.0065  | 0.0011 | 4.93E-09 | 3,037,470 | primary | - |
| -0.0069 | 0.0011 | 1.24E-10 | 3,023,190 | primary | - |
| -0.0075 | 0.0011 | 1.37E-12 | 3,037,460 | primary | - |
| 0.0107  | 0.0011 | 1.47E-23 | 3,037,420 | primary | - |
| -0.0084 | 0.0011 | 1.36E-14 | 3,037,500 | primary | - |
| -0.0096 | 0.0011 | 1.92E-17 | 3,032,440 | primary | - |
| -0.0063 | 0.0011 | 3.40E-09 | 3,037,470 | primary | - |
| 0.0093  | 0.0012 | 1.67E-15 | 3,037,430 | primary | - |
| -0.0133 | 0.0011 | 1.29E-33 | 3,037,350 | primary | - |
| -0.0072 | 0.0013 | 2.42E-08 | 3,037,410 | primary | - |
| -0.0099 | 0.0015 | 1.56E-11 | 3,037,450 | primary | - |
| 0.0101  | 0.0016 | 3.60E-10 | 3,037,460 | primary | - |
| -0.0131 | 0.0020 | 2.92E-11 | 3,035,240 | primary | - |
| 0.0080  | 0.0011 | 3.68E-14 | 3,024,900 | primary | - |
| 0.0215  | 0.0030 | 5.47E-13 | 2,834,210 | primary | - |
| 0.0069  | 0.0011 | 6.65E-11 | 3,037,440 | primary | - |
| 0.0096  | 0.0011 | 2.68E-18 | 3,031,830 | primary | - |
| 0.0088  | 0.0011 | 4.14E-15 | 3,033,240 | primary | - |
| 0.0106  | 0.0011 | 1.61E-21 | 3,035,700 | primary | - |
| -0.0116 | 0.0016 | 7.88E-13 | 2,964,790 | primary | - |
| 0.0134  | 0.0013 | 2.54E-26 | 3,024,860 | primary | - |
| -0.0101 | 0.0018 | 1.04E-08 | 3,005,750 | primary | - |
| -0.0070 | 0.0012 | 1.02E-09 | 2,991,400 | primary | - |
| -0.0098 | 0.0011 | 1.19E-18 | 3,037,490 | primary | - |
| 0.0091  | 0.0013 | 4.24E-13 | 3,023,180 | primary | - |
| 0.0228  | 0.0038 | 2.26E-09 | 2,987,920 | primary | - |
| -0.0115 | 0.0011 | 9.17E-24 | 3,037,410 | primary | - |
| 0.0079  | 0.0011 | 3.80E-13 | 3,037,460 | primary | - |
| 0.0072  | 0.0011 | 1.87E-11 | 3,037,470 | primary | - |
| 0.0100  | 0.0013 | 9.45E-15 | 3,037,480 | primary | - |
| -0.0178 | 0.0031 | 6.21E-09 | 3,014,900 | primary | - |
| -0.0093 | 0.0011 | 1.45E-18 | 3,037,480 | primary | - |
| 0.0327  | 0.0019 | 8.36E-68 | 3,018,960 | primary | - |
| 0.0072  | 0.0012 | 6.03E-09 | 2,997,440 | primary | - |
| 0.0078  | 0.0013 | 9.30E-10 | 3,031,630 | primary | - |
| 0.0208  | 0.0024 | 5.27E-18 | 3,033,630 | primary | - |
| 0.0123  | 0.0012 | 5.58E-24 | 2,397,530 | primary | - |
| -0.0262 | 0.0046 | 1.26E-08 | 2,879,930 | primary | - |
| -0.0076 | 0.0012 | 3.99E-10 | 3,033,320 | primary | - |
| 0.0082  | 0.0014 | 9.26E-09 | 3,035,760 | primary | - |
| -0.0094 | 0.0015 | 1.21E-10 | 3,028,350 | primary | - |
| 0.0118  | 0.0016 | 8.97E-14 | 3,037,450 | primary | - |
| 0.0060  | 0.0011 | 2.12E-08 | 3,036,930 | primary | - |
| -0.0078 | 0.0011 | 4.70E-12 | 3,037,450 | primary | - |
| -0.0068 | 0.0011 | 6.03E-10 | 3,035,770 | primary | - |
| -0.0118 | 0.0021 | 3.81E-08 | 3,037,480 | primary | - |

|         |        |          |           |           |           |
|---------|--------|----------|-----------|-----------|-----------|
| 0.0107  | 0.0012 | 1.70E-20 | 3,036,880 | primary   | -         |
| -0.0079 | 0.0013 | 1.37E-09 | 2,272,180 | primary   | -         |
| -0.0072 | 0.0011 | 4.73E-11 | 3,037,470 | primary   | -         |
| 0.0167  | 0.0019 | 3.32E-18 | 3,023,210 | primary   | -         |
| -0.0165 | 0.0025 | 2.18E-11 | 3,037,460 | primary   | -         |
| 0.0076  | 0.0012 | 1.64E-10 | 3,036,890 | primary   | -         |
| -0.0073 | 0.0011 | 9.74E-12 | 3,000,820 | primary   | -         |
| 0.0071  | 0.0011 | 3.43E-10 | 2,964,500 | primary   | -         |
| -0.0107 | 0.0013 | 5.43E-16 | 3,024,920 | primary   | -         |
| -0.0143 | 0.0025 | 1.01E-08 | 2,985,030 | primary   | -         |
| 0.0106  | 0.0011 | 1.85E-22 | 3,037,410 | primary   | -         |
| 0.0069  | 0.0012 | 5.70E-09 | 3,035,030 | primary   | -         |
| 0.0097  | 0.0017 | 5.62E-09 | 3,037,480 | primary   | -         |
| 0.0077  | 0.0011 | 3.11E-13 | 3,033,310 | primary   | -         |
| -0.0078 | 0.0011 | 2.87E-13 | 3,023,250 | primary   | -         |
| -0.0171 | 0.0031 | 4.63E-08 | 3,020,780 | primary   | -         |
| -0.0096 | 0.0012 | 9.99E-17 | 3,037,400 | primary   | -         |
| 0.0139  | 0.0011 | 1.09E-33 | 3,037,350 | primary   | -         |
| -0.0148 | 0.0021 | 9.70E-13 | 3,037,470 | primary   | -         |
| 0.0068  | 0.0013 | 4.69E-08 | 3,037,470 | primary   | -         |
| -0.0183 | 0.0015 | 2.02E-33 | 3,037,440 | primary   | rs1437261 |
| 0.0108  | 0.0016 | 1.48E-11 | 2,596,370 | secondary | N/A       |
| 0.0084  | 0.0014 | 1.65E-09 | 3,037,480 | primary   | -         |
| -0.0085 | 0.0012 | 7.79E-13 | 2,998,930 | primary   | rs535013  |
| -0.0081 | 0.0014 | 2.05E-08 | 3,037,480 | secondary | N/A       |
| 0.0082  | 0.0012 | 4.87E-11 | 3,035,040 | primary   | -         |
| -0.0089 | 0.0014 | 5.65E-11 | 3,037,470 | primary   | -         |
| 0.0105  | 0.0015 | 1.01E-12 | 3,037,500 | primary   | -         |
| -0.0167 | 0.0020 | 1.56E-17 | 2,939,850 | primary   | -         |
| 0.0119  | 0.0012 | 3.94E-25 | 3,037,420 | primary   | -         |
| 0.0084  | 0.0014 | 6.30E-10 | 2,272,180 | primary   | -         |
| 0.0064  | 0.0011 | 1.89E-08 | 3,037,450 | secondary | N/A       |
| -0.0083 | 0.0011 | 3.76E-13 | 3,037,420 | primary   | rs1893953 |
| -0.0133 | 0.0018 | 8.95E-14 | 3,037,480 | primary   | -         |
| 0.0132  | 0.0018 | 7.65E-14 | 3,037,490 | primary   | -         |
| -0.0085 | 0.0011 | 5.64E-14 | 3,033,270 | primary   | -         |
| 0.0101  | 0.0012 | 1.45E-17 | 3,037,410 | primary   | -         |
| 0.0070  | 0.0011 | 4.51E-11 | 3,037,500 | primary   | -         |
| -0.0109 | 0.0011 | 3.42E-23 | 3,037,420 | primary   | -         |
| -0.0302 | 0.0052 | 4.52E-09 | 2,955,320 | primary   | -         |
| 0.0101  | 0.0015 | 6.88E-11 | 3,035,760 | primary   | -         |
| -0.0067 | 0.0011 | 2.48E-10 | 3,022,530 | primary   | -         |
| -0.0128 | 0.0020 | 1.73E-10 | 3,015,100 | primary   | -         |
| -0.0084 | 0.0011 | 4.98E-15 | 3,035,750 | primary   | -         |
| -0.0125 | 0.0012 | 4.44E-25 | 3,023,140 | primary   | -         |
| -0.0068 | 0.0011 | 2.26E-10 | 3,035,770 | primary   | -         |
| 0.0158  | 0.0015 | 1.46E-27 | 3,037,360 | primary   | -         |
| 0.0067  | 0.0011 | 2.04E-09 | 3,014,600 | primary   | -         |



|         |        |          |           |           |            |
|---------|--------|----------|-----------|-----------|------------|
| 0.0082  | 0.0011 | 1.79E-14 | 3,037,420 | primary   | -          |
| 0.0087  | 0.0014 | 7.63E-10 | 3,037,480 | primary   | -          |
| 0.0108  | 0.0012 | 9.71E-20 | 3,037,460 | primary   | -          |
| 0.0120  | 0.0011 | 1.57E-29 | 3,034,950 | primary   | -          |
| 0.0085  | 0.0011 | 6.92E-16 | 3,037,460 | primary   | -          |
| -0.0114 | 0.0011 | 8.06E-25 | 3,037,390 | primary   | -          |
| -0.0069 | 0.0011 | 7.71E-11 | 3,018,190 | primary   | -          |
| 0.0074  | 0.0011 | 2.80E-11 | 3,037,490 | primary   | -          |
| -0.0068 | 0.0011 | 2.08E-10 | 3,035,780 | primary   | -          |
| -0.0072 | 0.0011 | 3.46E-11 | 3,037,500 | primary   | -          |
| 0.0065  | 0.0011 | 4.05E-09 | 3,035,740 | primary   | -          |
| -0.0092 | 0.0011 | 5.31E-17 | 3,035,750 | primary   | -          |
| -0.0066 | 0.0012 | 1.53E-08 | 2,977,100 | primary   | -          |
| 0.0073  | 0.0011 | 1.54E-11 | 3,037,460 | primary   | -          |
| -0.0116 | 0.0014 | 9.99E-17 | 3,013,370 | primary   | -          |
| -0.0091 | 0.0011 | 1.62E-17 | 3,037,460 | primary   | -          |
| 0.0097  | 0.0012 | 4.86E-17 | 3,035,730 | primary   | -          |
| 0.0060  | 0.0011 | 1.98E-08 | 3,037,460 | primary   | -          |
| -0.0066 | 0.0011 | 3.68E-10 | 3,035,740 | primary   | -          |
| 0.0066  | 0.0011 | 1.22E-09 | 3,037,500 | primary   | -          |
| 0.0125  | 0.0016 | 1.16E-14 | 3,012,810 | primary   | -          |
| -0.0128 | 0.0012 | 5.38E-28 | 3,032,740 | primary   | -          |
| -0.0069 | 0.0012 | 9.26E-09 | 3,033,360 | primary   | -          |
| 0.0064  | 0.0011 | 9.66E-10 | 3,037,470 | primary   | -          |
| 0.0087  | 0.0011 | 3.36E-14 | 3,034,020 | primary   | -          |
| -0.0101 | 0.0014 | 1.87E-13 | 3,034,050 | primary   | -          |
| 0.0088  | 0.0015 | 8.77E-09 | 3,037,500 | primary   | -          |
| -0.0072 | 0.0011 | 2.03E-11 | 2,978,330 | primary   | -          |
| -0.0065 | 0.0011 | 1.17E-09 | 3,024,630 | primary   | -          |
| -0.0091 | 0.0011 | 3.47E-17 | 3,034,420 | primary   | -          |
| -0.0087 | 0.0013 | 1.04E-11 | 3,034,980 | primary   | -          |
| -0.0099 | 0.0017 | 2.15E-09 | 2,997,610 | primary   | -          |
| -0.0096 | 0.0011 | 1.18E-17 | 3,036,660 | primary   | -          |
| 0.0105  | 0.0017 | 6.55E-10 | 2,859,860 | primary   | -          |
| -0.0079 | 0.0011 | 1.30E-13 | 3,036,670 | primary   | -          |
| -0.0067 | 0.0012 | 6.01E-09 | 3,036,710 | primary   | -          |
| 0.0097  | 0.0016 | 5.59E-10 | 2,990,320 | primary   | -          |
| 0.0092  | 0.0011 | 3.14E-18 | 3,036,120 | primary   | -          |
| 0.0109  | 0.0015 | 1.26E-12 | 3,032,540 | primary   | -          |
| -0.0082 | 0.0011 | 2.47E-13 | 3,036,660 | primary   | -          |
| -0.0144 | 0.0013 | 3.71E-29 | 2,997,630 | primary   | -          |
| -0.0063 | 0.0011 | 1.09E-08 | 3,015,790 | primary   | -          |
| 0.0076  | 0.0012 | 9.35E-11 | 3,036,660 | primary   | -          |
| 0.0087  | 0.0014 | 1.90E-10 | 3,007,550 | primary   | -          |
| 0.0226  | 0.0040 | 1.72E-08 | 3,029,540 | primary   | -          |
| -0.0090 | 0.0012 | 5.04E-13 | 3,036,600 | secondary | N/A        |
| -0.0098 | 0.0012 | 2.40E-15 | 3,034,870 | primary   | rs10940919 |
| 0.0098  | 0.0014 | 1.36E-11 | 3,036,660 | primary   | -          |

|         |        |          |           |           |           |
|---------|--------|----------|-----------|-----------|-----------|
| 0.0067  | 0.0011 | 1.94E-10 | 3,034,930 | primary   | -         |
| -0.0101 | 0.0017 | 1.57E-09 | 3,036,660 | primary   | -         |
| 0.0081  | 0.0011 | 6.98E-14 | 3,034,960 | primary   | -         |
| -0.0190 | 0.0024 | 2.86E-15 | 3,029,940 | primary   | -         |
| -0.0081 | 0.0011 | 1.48E-14 | 3,036,640 | primary   | -         |
| -0.0083 | 0.0013 | 1.94E-10 | 3,036,660 | primary   | -         |
| 0.0156  | 0.0016 | 2.95E-22 | 3,036,620 | primary   | rs435713  |
| 0.0077  | 0.0013 | 5.29E-09 | 3,036,690 | secondary | N/A       |
| 0.0083  | 0.0012 | 6.67E-13 | 3,036,670 | primary   | -         |
| -0.0071 | 0.0011 | 6.39E-11 | 3,034,960 | primary   | -         |
| 0.0059  | 0.0011 | 3.73E-08 | 3,036,660 | primary   | -         |
| 0.0081  | 0.0011 | 2.38E-14 | 3,036,670 | primary   | -         |
| 0.0098  | 0.0011 | 1.72E-18 | 3,036,620 | primary   | -         |
| 0.0069  | 0.0011 | 2.20E-09 | 3,036,120 | primary   | -         |
| -0.0131 | 0.0012 | 1.17E-28 | 3,036,620 | primary   | -         |
| 0.0103  | 0.0014 | 2.31E-14 | 3,036,680 | primary   | -         |
| -0.0121 | 0.0022 | 4.71E-08 | 3,003,700 | primary   | -         |
| 0.0093  | 0.0013 | 3.95E-13 | 3,036,650 | primary   | -         |
| -0.0089 | 0.0011 | 1.98E-15 | 3,036,630 | primary   | -         |
| -0.0115 | 0.0012 | 3.43E-21 | 3,036,540 | primary   | -         |
| -0.0145 | 0.0011 | 2.80E-37 | 3,035,820 | primary   | -         |
| -0.0166 | 0.0015 | 7.27E-29 | 3,034,790 | primary   | -         |
| 0.0108  | 0.0016 | 2.42E-11 | 3,035,790 | primary   | -         |
| -0.0079 | 0.0011 | 1.17E-13 | 3,036,690 | primary   | -         |
| -0.0124 | 0.0021 | 4.37E-09 | 3,003,180 | secondary | N/A       |
| -0.0179 | 0.0021 | 2.41E-17 | 3,036,710 | primary   | rs1812798 |
| -0.0082 | 0.0013 | 6.35E-11 | 3,034,890 | secondary | N/A       |
| -0.0099 | 0.0012 | 2.18E-17 | 3,036,560 | primary   | rs2365396 |
| 0.0110  | 0.0014 | 1.48E-14 | 3,034,030 | primary   | -         |
| -0.0180 | 0.0030 | 1.47E-09 | 2,843,030 | primary   | -         |
| 0.0174  | 0.0018 | 1.24E-22 | 3,036,640 | primary   | -         |
| -0.0104 | 0.0012 | 6.29E-17 | 3,024,140 | primary   | -         |
| 0.0092  | 0.0015 | 2.13E-09 | 3,034,950 | primary   | -         |
| -0.0107 | 0.0014 | 4.81E-15 | 3,024,130 | primary   | -         |
| 0.0079  | 0.0012 | 1.33E-10 | 3,035,760 | primary   | -         |
| -0.0184 | 0.0014 | 6.43E-38 | 3,022,280 | primary   | -         |
| -0.0072 | 0.0012 | 1.95E-09 | 3,036,170 | primary   | -         |
| 0.0122  | 0.0016 | 9.37E-14 | 3,032,550 | primary   | -         |
| -0.0070 | 0.0011 | 9.90E-11 | 3,034,980 | primary   | -         |
| 0.0120  | 0.0017 | 8.15E-13 | 3,036,700 | primary   | -         |
| 0.0092  | 0.0014 | 9.55E-11 | 3,036,660 | primary   | -         |
| 0.0069  | 0.0012 | 3.80E-09 | 3,036,720 | primary   | -         |
| 0.0066  | 0.0011 | 1.67E-09 | 3,035,000 | primary   | -         |
| 0.0553  | 0.0097 | 1.12E-08 | 2,912,860 | primary   | -         |
| -0.0078 | 0.0011 | 1.70E-13 | 3,034,940 | primary   | -         |
| 0.0068  | 0.0012 | 1.78E-08 | 3,024,160 | secondary | N/A       |
| -0.0132 | 0.0014 | 7.65E-21 | 3,036,700 | primary   | rs252761  |
| -0.0096 | 0.0011 | 6.16E-19 | 3,036,660 | primary   | -         |

|         |        |          |           |           |             |
|---------|--------|----------|-----------|-----------|-------------|
| 0.0059  | 0.0011 | 2.07E-08 | 3,036,130 | primary   | -           |
| -0.0094 | 0.0012 | 1.33E-15 | 3,019,990 | primary   | -           |
| 0.0073  | 0.0013 | 1.39E-08 | 3,036,640 | primary   | -           |
| -0.0128 | 0.0020 | 1.08E-10 | 3,036,680 | primary   | -           |
| 0.0112  | 0.0019 | 3.06E-09 | 2,544,010 | primary   | -           |
| -0.0065 | 0.0011 | 4.09E-09 | 3,036,680 | primary   | -           |
| -0.0092 | 0.0011 | 2.87E-18 | 3,036,690 | primary   | -           |
| -0.0084 | 0.0011 | 2.80E-14 | 3,036,730 | primary   | -           |
| -0.0248 | 0.0039 | 1.85E-10 | 3,003,940 | secondary | N/A         |
| 0.0127  | 0.0015 | 2.41E-17 | 2,815,170 | primary   | rs147946601 |
| 0.0127  | 0.0018 | 1.78E-12 | 3,022,250 | primary   | -           |
| 0.0149  | 0.0012 | 9.51E-33 | 3,034,790 | primary   | rs34316     |
| 0.0130  | 0.0012 | 1.23E-26 | 2,999,840 | secondary | N/A         |
| 0.0075  | 0.0011 | 3.07E-11 | 3,036,630 | primary   | -           |
| 0.0096  | 0.0011 | 7.76E-17 | 3,034,910 | primary   | -           |
| 0.0107  | 0.0015 | 8.84E-13 | 2,998,330 | primary   | -           |
| -0.0093 | 0.0016 | 2.78E-09 | 3,032,530 | primary   | -           |
| 0.0117  | 0.0013 | 3.92E-19 | 3,036,610 | primary   | -           |
| 0.0112  | 0.0012 | 3.64E-21 | 3,034,900 | primary   | -           |
| 0.0082  | 0.0013 | 1.33E-10 | 3,036,160 | primary   | -           |
| 0.0100  | 0.0014 | 4.50E-12 | 3,036,670 | primary   | -           |
| -0.0137 | 0.0011 | 4.17E-34 | 3,036,600 | primary   | -           |
| -0.0095 | 0.0014 | 4.49E-11 | 3,036,690 | primary   | -           |
| 0.0254  | 0.0027 | 9.22E-22 | 3,016,020 | secondary | N/A         |
| -0.0132 | 0.0011 | 2.22E-32 | 3,010,140 | primary   | -           |
| -0.0285 | 0.0040 | 6.47E-13 | 2,937,160 | primary   | -           |
| 0.0284  | 0.0016 | 2.37E-72 | 3,036,060 | primary   | rs12188716  |
| 0.0088  | 0.0011 | 2.97E-16 | 3,036,670 | primary   | -           |
| -0.0070 | 0.0012 | 2.14E-09 | 3,034,990 | primary   | -           |
| -0.0168 | 0.0024 | 4.80E-12 | 3,025,570 | primary   | -           |
| -0.0084 | 0.0013 | 7.52E-11 | 3,036,680 | primary   | -           |
| 0.0192  | 0.0028 | 7.41E-12 | 3,021,780 | primary   | -           |
| 0.0083  | 0.0012 | 6.49E-12 | 3,024,150 | primary   | -           |
| -0.0108 | 0.0013 | 6.80E-16 | 3,036,610 | primary   | rs74944275  |
| 0.0164  | 0.0028 | 7.34E-09 | 3,001,410 | secondary | N/A         |
| 0.0163  | 0.0012 | 2.94E-44 | 3,036,520 | primary   | -           |
| -0.0070 | 0.0012 | 9.95E-09 | 3,036,660 | primary   | -           |
| -0.0069 | 0.0011 | 6.99E-10 | 3,029,350 | primary   | -           |
| 0.0097  | 0.0015 | 1.06E-10 | 3,036,710 | primary   | -           |
| 0.0098  | 0.0013 | 2.83E-14 | 3,024,090 | primary   | -           |
| 0.0081  | 0.0011 | 2.94E-13 | 3,036,610 | primary   | -           |
| -0.0142 | 0.0021 | 1.34E-11 | 3,036,700 | primary   | -           |
| 0.0128  | 0.0011 | 4.28E-30 | 3,036,620 | primary   | -           |
| -0.0076 | 0.0013 | 5.92E-09 | 3,032,550 | primary   | -           |
| -0.0093 | 0.0011 | 1.08E-18 | 3,036,630 | primary   | -           |
| -0.0124 | 0.0011 | 3.22E-28 | 3,032,490 | primary   | -           |
| -0.0074 | 0.0012 | 1.18E-09 | 3,024,160 | primary   | -           |
| -0.0096 | 0.0017 | 1.04E-08 | 3,036,670 | primary   | -           |

|         |        |          |           |           |                      |
|---------|--------|----------|-----------|-----------|----------------------|
| -0.0149 | 0.0023 | 9.58E-11 | 3,036,140 | primary   | -                    |
| -0.0066 | 0.0011 | 5.16E-09 | 3,034,980 | primary   | -                    |
| 0.0083  | 0.0014 | 5.12E-09 | 3,033,260 | primary   | -                    |
| -0.0060 | 0.0011 | 4.27E-08 | 3,036,690 | primary   | -                    |
| 0.0337  | 0.0039 | 6.04E-18 | 3,016,340 | primary   | -                    |
| 0.0079  | 0.0014 | 4.20E-08 | 3,036,680 | primary   | -                    |
| 0.0076  | 0.0013 | 1.37E-08 | 3,022,450 | primary   | -                    |
| 0.0148  | 0.0013 | 2.64E-29 | 3,036,630 | primary   | -                    |
| 0.0074  | 0.0011 | 1.38E-11 | 3,024,170 | primary   | -                    |
| -0.0151 | 0.0023 | 6.00E-11 | 3,021,030 | primary   | -                    |
| 0.0076  | 0.0011 | 1.56E-11 | 3,034,920 | primary   | -                    |
| 0.0167  | 0.0028 | 3.08E-09 | 3,026,710 | primary   | -                    |
| -0.0128 | 0.0011 | 5.67E-29 | 3,005,350 | primary   | -                    |
| 0.0080  | 0.0011 | 1.13E-13 | 3,036,660 | primary   | -                    |
| 0.0525  | 0.0034 | 6.78E-54 | 3,035,010 | secondary | N/A                  |
| -0.0570 | 0.0032 | 9.25E-73 | 2,970,620 | primary   | rs1962848,rs13156123 |
| 0.0121  | 0.0013 | 3.44E-20 | 3,004,860 | secondary | N/A                  |
| -0.0332 | 0.0033 | 6.70E-24 | 3,015,400 | primary   | -                    |
| -0.0253 | 0.0036 | 1.40E-12 | 3,034,830 | primary   | -                    |
| -0.0074 | 0.0012 | 1.50E-10 | 3,036,700 | primary   | -                    |
| 0.0076  | 0.0011 | 5.98E-12 | 3,029,250 | primary   | -                    |
| 0.0076  | 0.0011 | 1.10E-12 | 3,032,530 | primary   | -                    |
| -0.0094 | 0.0014 | 3.70E-12 | 3,036,660 | primary   | -                    |
| -0.0078 | 0.0011 | 4.18E-13 | 3,034,910 | primary   | -                    |
| -0.0073 | 0.0012 | 1.36E-09 | 3,000,030 | primary   | -                    |
| 0.0154  | 0.0011 | 2.09E-47 | 3,036,580 | primary   | -                    |
| -0.0110 | 0.0013 | 1.39E-17 | 3,000,030 | primary   | -                    |
| 0.0148  | 0.0015 | 7.69E-23 | 3,036,610 | primary   | -                    |
| -0.0098 | 0.0015 | 5.85E-11 | 3,036,660 | primary   | -                    |
| 0.0112  | 0.0013 | 4.32E-19 | 3,036,670 | primary   | -                    |
| -0.0102 | 0.0012 | 1.28E-17 | 3,036,640 | primary   | -                    |
| 0.0089  | 0.0011 | 5.26E-17 | 3,034,410 | primary   | -                    |
| -0.0124 | 0.0013 | 1.96E-22 | 3,036,580 | primary   | -                    |
| -0.0244 | 0.0038 | 1.29E-10 | 2,999,260 | primary   | -                    |
| 0.0148  | 0.0021 | 1.49E-12 | 3,021,450 | primary   | -                    |
| 0.0068  | 0.0012 | 4.88E-08 | 3,036,650 | primary   | -                    |
| -0.0100 | 0.0015 | 1.04E-10 | 3,018,290 | primary   | -                    |
| 0.0140  | 0.0018 | 3.76E-14 | 3,033,270 | primary   | -                    |
| -0.0106 | 0.0011 | 1.19E-21 | 3,024,080 | primary   | -                    |
| -0.0085 | 0.0013 | 6.12E-11 | 3,036,670 | primary   | -                    |
| 0.0065  | 0.0011 | 5.94E-10 | 3,036,710 | primary   | -                    |
| 0.0144  | 0.0024 | 1.35E-09 | 2,934,010 | primary   | -                    |
| -0.0074 | 0.0011 | 5.91E-11 | 3,036,690 | primary   | -                    |
| -0.0097 | 0.0013 | 1.35E-14 | 3,031,940 | primary   | -                    |
| -0.0069 | 0.0012 | 6.84E-09 | 3,036,690 | primary   | -                    |
| 0.0112  | 0.0011 | 7.68E-23 | 3,036,640 | primary   | -                    |
| -0.0083 | 0.0013 | 2.11E-10 | 3,032,700 | primary   | -                    |
| 0.0060  | 0.0011 | 1.37E-08 | 3,036,700 | primary   | -                    |

|         |        |          |           |         |   |
|---------|--------|----------|-----------|---------|---|
| -0.0089 | 0.0013 | 4.13E-12 | 3,036,640 | primary | - |
| 0.0081  | 0.0014 | 1.26E-08 | 2,713,330 | primary | - |
| -0.0067 | 0.0011 | 2.69E-10 | 3,036,680 | primary | - |
| 0.0075  | 0.0012 | 4.27E-10 | 3,036,660 | primary | - |
| 0.0087  | 0.0012 | 1.03E-12 | 3,032,530 | primary | - |
| -0.0513 | 0.0092 | 2.09E-08 | 2,909,100 | primary | - |
| -0.0112 | 0.0012 | 3.22E-20 | 3,036,660 | primary | - |
| -0.0111 | 0.0013 | 4.58E-18 | 3,020,720 | primary | - |
| -0.0356 | 0.0048 | 1.60E-13 | 3,006,540 | primary | - |
| -0.0083 | 0.0011 | 1.19E-14 | 3,036,700 | primary | - |
| 0.0473  | 0.0075 | 2.68E-10 | 2,713,330 | primary | - |
| -0.0059 | 0.0011 | 2.47E-08 | 3,024,180 | primary | - |
| 0.0105  | 0.0016 | 6.95E-11 | 3,034,240 | primary | - |
| -0.0090 | 0.0014 | 6.37E-11 | 3,036,680 | primary | - |
| 0.0084  | 0.0013 | 5.56E-11 | 3,024,120 | primary | - |
| 0.0072  | 0.0011 | 2.11E-11 | 3,036,710 | primary | - |
| -0.0145 | 0.0012 | 2.44E-35 | 3,022,340 | primary | - |
| 0.0072  | 0.0011 | 6.48E-11 | 3,034,950 | primary | - |
| -0.0082 | 0.0011 | 8.00E-15 | 3,034,850 | primary | - |
| 0.0101  | 0.0011 | 1.51E-19 | 3,036,670 | primary | - |
| 0.0097  | 0.0011 | 9.69E-20 | 3,036,670 | primary | - |
| 0.0073  | 0.0011 | 1.95E-10 | 3,036,690 | primary | - |
| -0.0079 | 0.0014 | 1.51E-08 | 3,036,660 | primary | - |
| 0.0094  | 0.0014 | 5.22E-11 | 3,034,950 | primary | - |
| 0.0085  | 0.0011 | 9.59E-15 | 3,011,550 | primary | - |
| -0.0070 | 0.0011 | 5.06E-10 | 3,034,980 | primary | - |
| -0.0122 | 0.0018 | 3.45E-11 | 3,036,660 | primary | - |
| 0.0087  | 0.0011 | 3.22E-14 | 3,033,400 | primary | - |
| -0.0102 | 0.0011 | 3.55E-19 | 3,036,650 | primary | - |
| -0.0075 | 0.0011 | 7.36E-12 | 3,011,260 | primary | - |
| -0.0157 | 0.0023 | 9.43E-12 | 3,026,990 | primary | - |
| 0.0124  | 0.0019 | 5.31E-11 | 3,034,260 | primary | - |
| -0.0083 | 0.0013 | 1.17E-10 | 3,019,220 | primary | - |
| 0.0093  | 0.0011 | 1.30E-17 | 3,036,640 | primary | - |
| 0.0098  | 0.0012 | 1.56E-17 | 3,005,800 | primary | - |
| -0.0076 | 0.0011 | 5.01E-13 | 3,034,930 | primary | - |
| 0.0131  | 0.0011 | 3.14E-35 | 3,030,530 | primary | - |
| -0.0083 | 0.0011 | 1.35E-14 | 3,034,980 | primary | - |
| -0.0067 | 0.0011 | 2.05E-09 | 3,005,030 | primary | - |
| 0.0059  | 0.0011 | 3.75E-08 | 3,029,100 | primary | - |
| -0.0082 | 0.0012 | 9.13E-12 | 3,036,700 | primary | - |
| 0.0087  | 0.0011 | 1.37E-16 | 3,037,430 | primary | - |
| -0.0065 | 0.0011 | 2.81E-09 | 3,037,480 | primary | - |
| 0.0077  | 0.0011 | 5.49E-13 | 3,037,470 | primary | - |
| -0.0121 | 0.0016 | 8.35E-14 | 3,000,820 | primary | - |
| 0.0076  | 0.0011 | 4.82E-12 | 3,034,870 | primary | - |
| -0.0105 | 0.0011 | 1.05E-21 | 3,024,930 | primary | - |
| -0.0074 | 0.0012 | 1.15E-10 | 3,037,450 | primary | - |

|         |        |          |           |           |                     |
|---------|--------|----------|-----------|-----------|---------------------|
| -0.0124 | 0.0014 | 1.67E-19 | 3,037,440 | primary   | -                   |
| 0.0121  | 0.0017 | 2.40E-12 | 3,037,460 | primary   | -                   |
| -0.0154 | 0.0014 | 2.48E-29 | 3,032,330 | primary   | -                   |
| 0.0077  | 0.0012 | 1.43E-10 | 3,019,950 | primary   | -                   |
| -0.0080 | 0.0011 | 1.64E-13 | 3,008,530 | primary   | -                   |
| 0.0296  | 0.0052 | 1.25E-08 | 2,972,600 | primary   | -                   |
| 0.0115  | 0.0011 | 1.19E-26 | 3,036,850 | primary   | -                   |
| 0.0096  | 0.0013 | 2.29E-13 | 3,037,510 | secondary | N/A                 |
| -0.0225 | 0.0013 | 1.78E-67 | 3,035,600 | primary   | rs2025124           |
| 0.0109  | 0.0013 | 5.53E-16 | 3,024,910 | primary   | -                   |
| 0.0086  | 0.0012 | 2.23E-13 | 3,036,970 | primary   | -                   |
| -0.0164 | 0.0014 | 1.37E-31 | 3,037,370 | primary   | -                   |
| 0.0368  | 0.0064 | 6.73E-09 | 2,950,650 | primary   | -                   |
| -0.0094 | 0.0011 | 2.82E-19 | 3,037,470 | primary   | -                   |
| 0.0073  | 0.0013 | 7.30E-09 | 3,037,480 | primary   | -                   |
| 0.0159  | 0.0011 | 2.21E-44 | 3,035,660 | primary   | -                   |
| 0.0127  | 0.0011 | 1.54E-30 | 3,037,350 | primary   | -                   |
| -0.0062 | 0.0011 | 2.06E-08 | 3,015,270 | primary   | -                   |
| -0.0114 | 0.0011 | 2.53E-24 | 3,035,690 | primary   | -                   |
| 0.0212  | 0.0038 | 2.22E-08 | 2,196,620 | primary   | -                   |
| 0.0096  | 0.0012 | 1.89E-15 | 3,037,420 | primary   | -                   |
| 0.0148  | 0.0014 | 1.06E-25 | 2,519,950 | primary   | -                   |
| 0.0094  | 0.0014 | 1.28E-11 | 2,961,150 | secondary | N/A                 |
| -0.0352 | 0.0022 | 5.98E-58 | 2,227,040 | primary   | rs1362104,rs1110464 |
| -0.0293 | 0.0030 | 7.58E-23 | 2,956,910 | primary   | -                   |
| 0.0308  | 0.0021 | 7.97E-51 | 2,918,710 | secondary | N/A                 |
| -0.0208 | 0.0030 | 6.75E-12 | 2,928,990 | primary   | -                   |
| 0.0226  | 0.0016 | 3.78E-45 | 3,035,750 | primary   | -                   |
| -0.0193 | 0.0019 | 2.93E-24 | 3,030,660 | primary   | -                   |
| 0.0356  | 0.0052 | 1.02E-11 | 1,660,250 | primary   | -                   |
| -0.0111 | 0.0014 | 9.07E-15 | 3,032,360 | primary   | -                   |
| -0.0113 | 0.0014 | 6.56E-17 | 3,028,200 | primary   | -                   |
| -0.0102 | 0.0014 | 3.53E-13 | 3,010,730 | primary   | -                   |
| 0.0382  | 0.0058 | 4.32E-11 | 2,957,060 | primary   | -                   |
| 0.0079  | 0.0011 | 2.41E-12 | 3,037,480 | primary   | -                   |
| 0.0065  | 0.0011 | 6.83E-10 | 3,036,930 | primary   | -                   |
| -0.0089 | 0.0013 | 4.76E-12 | 2,999,100 | primary   | -                   |
| 0.0319  | 0.0048 | 3.63E-11 | 2,995,360 | primary   | -                   |
| -0.0117 | 0.0012 | 1.27E-23 | 3,037,440 | primary   | -                   |
| 0.0105  | 0.0013 | 7.57E-16 | 2,272,170 | primary   | -                   |
| -0.0063 | 0.0011 | 6.08E-09 | 3,037,480 | primary   | -                   |
| 0.0106  | 0.0011 | 2.36E-23 | 3,035,700 | primary   | -                   |
| -0.0235 | 0.0033 | 1.17E-12 | 3,029,320 | primary   | -                   |
| 0.0139  | 0.0019 | 1.19E-12 | 3,024,920 | primary   | -                   |
| 0.0076  | 0.0011 | 6.00E-13 | 3,037,460 | primary   | -                   |
| 0.0090  | 0.0013 | 1.30E-11 | 3,037,500 | primary   | -                   |
| 0.0095  | 0.0011 | 2.75E-17 | 3,035,730 | primary   | -                   |
| -0.0089 | 0.0012 | 2.25E-13 | 3,037,460 | primary   | -                   |

|         |        |          |           |           |           |
|---------|--------|----------|-----------|-----------|-----------|
| 0.0152  | 0.0023 | 3.28E-11 | 2,999,740 | primary   | -         |
| -0.0064 | 0.0011 | 1.39E-09 | 3,037,450 | primary   | -         |
| 0.0075  | 0.0011 | 8.56E-13 | 3,037,450 | primary   | -         |
| -0.0229 | 0.0022 | 2.10E-25 | 3,036,910 | primary   | -         |
| 0.0076  | 0.0012 | 1.54E-10 | 3,037,460 | primary   | -         |
| -0.0110 | 0.0014 | 1.10E-15 | 3,024,920 | primary   | -         |
| -0.0100 | 0.0012 | 2.68E-17 | 3,035,760 | primary   | -         |
| -0.0091 | 0.0013 | 4.86E-12 | 3,037,450 | primary   | -         |
| 0.0088  | 0.0013 | 7.09E-12 | 3,035,250 | primary   | -         |
| 0.0101  | 0.0012 | 2.70E-18 | 3,037,470 | primary   | -         |
| 0.0113  | 0.0013 | 4.58E-19 | 3,037,460 | primary   | -         |
| 0.0063  | 0.0011 | 1.63E-08 | 3,035,540 | primary   | -         |
| 0.0105  | 0.0014 | 9.94E-15 | 3,036,900 | primary   | -         |
| -0.0069 | 0.0011 | 1.36E-09 | 3,037,500 | primary   | -         |
| 0.0122  | 0.0018 | 9.05E-12 | 3,037,480 | primary   | -         |
| 0.0083  | 0.0011 | 4.00E-14 | 3,024,950 | primary   | -         |
| 0.0436  | 0.0047 | 4.15E-20 | 2,992,210 | primary   | -         |
| 0.0077  | 0.0012 | 5.34E-11 | 3,037,470 | primary   | -         |
| -0.0061 | 0.0011 | 6.65E-09 | 3,037,460 | primary   | -         |
| -0.0070 | 0.0011 | 4.67E-11 | 3,037,480 | primary   | -         |
| 0.0076  | 0.0012 | 1.03E-10 | 3,037,480 | primary   | -         |
| 0.0082  | 0.0014 | 7.53E-09 | 3,020,740 | primary   | -         |
| 0.0097  | 0.0013 | 3.86E-13 | 3,030,010 | primary   | -         |
| 0.0073  | 0.0011 | 4.11E-11 | 3,000,810 | primary   | -         |
| -0.0075 | 0.0013 | 4.03E-09 | 3,021,560 | primary   | -         |
| 0.0078  | 0.0011 | 1.34E-12 | 3,035,740 | primary   | -         |
| 0.0203  | 0.0019 | 1.64E-25 | 3,037,390 | primary   | -         |
| -0.0083 | 0.0014 | 1.34E-09 | 3,024,940 | primary   | -         |
| 0.0113  | 0.0017 | 1.09E-11 | 3,037,490 | primary   | -         |
| -0.0062 | 0.0011 | 6.63E-09 | 3,035,750 | primary   | -         |
| 0.0070  | 0.0012 | 4.47E-09 | 3,019,220 | primary   | -         |
| -0.0120 | 0.0012 | 1.52E-22 | 3,037,440 | primary   | -         |
| -0.0101 | 0.0011 | 2.18E-21 | 3,037,460 | primary   | -         |
| 0.0114  | 0.0012 | 9.50E-23 | 3,000,800 | primary   | -         |
| -0.0080 | 0.0011 | 1.46E-13 | 3,037,450 | primary   | -         |
| -0.0081 | 0.0011 | 4.72E-13 | 3,037,440 | primary   | -         |
| 0.0072  | 0.0012 | 4.23E-09 | 3,035,740 | primary   | -         |
| -0.0103 | 0.0011 | 9.06E-22 | 3,035,700 | primary   | -         |
| -0.0148 | 0.0022 | 1.40E-11 | 764,580   | secondary | N/A       |
| 0.0207  | 0.0011 | 1.04E-79 | 3,036,510 | primary   | rs1933721 |
| -0.0091 | 0.0011 | 1.09E-16 | 3,037,470 | primary   | -         |
| -0.0068 | 0.0011 | 1.07E-09 | 3,037,520 | primary   | -         |
| 0.0096  | 0.0012 | 8.98E-15 | 3,035,710 | primary   | -         |
| 0.0092  | 0.0012 | 5.55E-14 | 3,035,750 | primary   | -         |
| 0.0066  | 0.0011 | 5.93E-09 | 3,035,620 | primary   | -         |
| 0.0074  | 0.0011 | 2.58E-11 | 3,000,850 | primary   | -         |
| -0.0093 | 0.0012 | 3.08E-14 | 3,036,950 | primary   | -         |
| 0.0107  | 0.0016 | 1.25E-11 | 3,037,460 | primary   | -         |

|         |        |          |           |           |           |
|---------|--------|----------|-----------|-----------|-----------|
| 0.0091  | 0.0011 | 1.69E-16 | 3,035,730 | primary   | -         |
| 0.0066  | 0.0011 | 4.33E-10 | 3,037,490 | primary   | -         |
| 0.0087  | 0.0011 | 9.20E-16 | 3,037,490 | primary   | -         |
| -0.0125 | 0.0013 | 1.54E-21 | 3,037,410 | primary   | -         |
| -0.0078 | 0.0011 | 2.33E-13 | 3,037,480 | primary   | -         |
| -0.0203 | 0.0025 | 4.31E-16 | 3,037,460 | primary   | -         |
| -0.0095 | 0.0014 | 4.96E-12 | 2,272,200 | primary   | -         |
| 0.0097  | 0.0012 | 6.13E-15 | 3,037,460 | primary   | -         |
| 0.0155  | 0.0016 | 5.53E-21 | 3,035,700 | primary   | -         |
| 0.0110  | 0.0015 | 3.07E-13 | 3,037,460 | primary   | -         |
| 0.0109  | 0.0014 | 6.23E-16 | 3,033,940 | primary   | -         |
| -0.0071 | 0.0011 | 1.67E-10 | 3,037,440 | primary   | -         |
| 0.0072  | 0.0011 | 1.44E-11 | 3,037,470 | primary   | -         |
| -0.0135 | 0.0011 | 4.44E-32 | 3,035,670 | primary   | -         |
| -0.0092 | 0.0011 | 1.14E-15 | 3,037,460 | primary   | -         |
| -0.0185 | 0.0030 | 5.29E-10 | 2,938,930 | primary   | -         |
| 0.0148  | 0.0025 | 4.34E-09 | 2,272,190 | primary   | -         |
| 0.0096  | 0.0013 | 7.47E-13 | 3,037,430 | primary   | -         |
| 0.0077  | 0.0014 | 2.31E-08 | 3,037,500 | primary   | -         |
| 0.0186  | 0.0012 | 1.29E-53 | 3,035,690 | primary   | rs4897189 |
| 0.0097  | 0.0014 | 5.95E-12 | 3,024,970 | secondary | N/A       |
| -0.0078 | 0.0012 | 1.57E-10 | 2,581,280 | primary   | -         |
| -0.0124 | 0.0012 | 5.52E-26 | 3,037,400 | primary   | -         |
| 0.0108  | 0.0012 | 5.03E-20 | 3,035,740 | primary   | -         |
| -0.0082 | 0.0012 | 7.62E-12 | 3,035,780 | primary   | -         |
| 0.0071  | 0.0012 | 3.75E-09 | 3,034,870 | primary   | -         |
| 0.0098  | 0.0011 | 4.67E-18 | 3,035,490 | primary   | -         |
| -0.0120 | 0.0012 | 1.33E-22 | 3,037,420 | primary   | -         |
| -0.0071 | 0.0012 | 7.78E-10 | 3,035,760 | primary   | -         |
| 0.0086  | 0.0011 | 5.55E-16 | 3,037,430 | primary   | -         |
| -0.0106 | 0.0012 | 8.33E-19 | 3,035,680 | primary   | -         |
| -0.0110 | 0.0018 | 5.00E-10 | 3,034,090 | primary   | -         |
| -0.0067 | 0.0011 | 1.47E-10 | 3,037,460 | primary   | -         |
| -0.0085 | 0.0011 | 2.55E-15 | 3,037,460 | primary   | -         |
| 0.0167  | 0.0023 | 9.17E-13 | 3,033,290 | primary   | -         |
| -0.0155 | 0.0012 | 2.31E-35 | 3,037,360 | primary   | -         |
| -0.0119 | 0.0020 | 3.95E-09 | 2,992,780 | primary   | -         |
| 0.0133  | 0.0021 | 1.19E-10 | 3,011,850 | primary   | -         |
| -0.0113 | 0.0015 | 1.16E-13 | 3,037,450 | primary   | -         |
| 0.0146  | 0.0012 | 9.92E-37 | 3,009,640 | primary   | -         |
| -0.0093 | 0.0011 | 4.92E-17 | 3,035,740 | primary   | -         |
| -0.0086 | 0.0012 | 2.61E-13 | 3,037,470 | primary   | -         |
| -0.0136 | 0.0020 | 8.16E-12 | 3,037,450 | primary   | -         |
| -0.0091 | 0.0012 | 7.23E-15 | 3,037,460 | primary   | -         |
| -0.0087 | 0.0013 | 1.25E-11 | 2,883,450 | primary   | -         |
| -0.0292 | 0.0049 | 2.57E-09 | 2,972,190 | primary   | -         |
| -0.0120 | 0.0012 | 3.10E-24 | 3,037,420 | primary   | -         |
| 0.0102  | 0.0013 | 2.52E-15 | 3,014,330 | primary   | -         |



|         |        |          |           |         |   |
|---------|--------|----------|-----------|---------|---|
| -0.0083 | 0.0013 | 1.86E-10 | 3,035,740 | primary | - |
| 0.0146  | 0.0020 | 4.03E-13 | 3,022,470 | primary | - |
| 0.0093  | 0.0011 | 1.96E-16 | 3,024,900 | primary | - |
| 0.0070  | 0.0012 | 1.19E-08 | 3,037,450 | primary | - |
| 0.0074  | 0.0012 | 2.32E-09 | 3,037,440 | primary | - |
| -0.0087 | 0.0012 | 2.48E-12 | 3,021,650 | primary | - |
| -0.0072 | 0.0011 | 2.19E-11 | 3,037,440 | primary | - |
| -0.0077 | 0.0012 | 3.34E-10 | 2,713,280 | primary | - |
| 0.0109  | 0.0012 | 7.78E-19 | 3,017,250 | primary | - |
| -0.0085 | 0.0011 | 1.21E-13 | 3,037,460 | primary | - |
| -0.0078 | 0.0013 | 2.56E-09 | 3,029,390 | primary | - |
| -0.0097 | 0.0013 | 3.53E-14 | 2,272,160 | primary | - |
| -0.0104 | 0.0011 | 9.26E-21 | 3,033,300 | primary | - |
| 0.0113  | 0.0015 | 7.23E-14 | 3,020,870 | primary | - |
| -0.0080 | 0.0012 | 3.31E-12 | 2,997,860 | primary | - |
| 0.0168  | 0.0013 | 1.58E-37 | 3,033,680 | primary | - |
| 0.0262  | 0.0035 | 1.19E-13 | 2,987,680 | primary | - |
| 0.0153  | 0.0013 | 9.75E-33 | 3,037,340 | primary | - |
| 0.0164  | 0.0028 | 5.49E-09 | 2,536,930 | primary | - |
| 0.0133  | 0.0011 | 3.36E-36 | 3,037,380 | primary | - |
| -0.0079 | 0.0012 | 1.96E-10 | 3,035,740 | primary | - |
| -0.0077 | 0.0012 | 4.37E-10 | 3,028,110 | primary | - |
| -0.0073 | 0.0011 | 1.92E-10 | 2,999,490 | primary | - |
| 0.0173  | 0.0029 | 4.52E-09 | 2,916,820 | primary | - |
| 0.0093  | 0.0011 | 7.46E-19 | 3,037,420 | primary | - |
| -0.0064 | 0.0011 | 1.18E-09 | 3,027,840 | primary | - |
| 0.0084  | 0.0013 | 4.15E-10 | 3,019,060 | primary | - |
| 0.0140  | 0.0011 | 2.20E-39 | 3,037,380 | primary | - |
| -0.0093 | 0.0011 | 9.62E-18 | 3,022,480 | primary | - |
| -0.0121 | 0.0018 | 6.68E-12 | 3,035,530 | primary | - |
| -0.0069 | 0.0011 | 1.47E-09 | 3,024,950 | primary | - |
| 0.0127  | 0.0020 | 1.33E-10 | 3,036,940 | primary | - |
| -0.0349 | 0.0022 | 1.28E-56 | 3,031,190 | primary | - |
| 0.0093  | 0.0011 | 1.06E-17 | 3,037,440 | primary | - |
| 0.0080  | 0.0011 | 1.15E-13 | 3,035,230 | primary | - |
| 0.0147  | 0.0012 | 7.36E-37 | 3,031,800 | primary | - |
| -0.0080 | 0.0013 | 5.75E-10 | 3,037,450 | primary | - |
| -0.0068 | 0.0011 | 1.44E-10 | 3,037,430 | primary | - |
| 0.0077  | 0.0011 | 3.41E-13 | 3,035,160 | primary | - |
| -0.0073 | 0.0011 | 2.39E-11 | 3,037,450 | primary | - |
| -0.0097 | 0.0016 | 4.36E-10 | 3,037,450 | primary | - |
| 0.0154  | 0.0026 | 5.13E-09 | 3,006,060 | primary | - |
| 0.0115  | 0.0013 | 1.16E-18 | 3,035,730 | primary | - |
| -0.0113 | 0.0013 | 5.63E-17 | 3,022,340 | primary | - |
| -0.0078 | 0.0011 | 1.13E-12 | 3,037,460 | primary | - |
| 0.0079  | 0.0011 | 1.19E-13 | 3,037,450 | primary | - |
| -0.0129 | 0.0012 | 1.44E-26 | 3,035,690 | primary | - |
| -0.0083 | 0.0011 | 5.83E-15 | 3,037,470 | primary | - |

|         |        |          |           |           |                      |
|---------|--------|----------|-----------|-----------|----------------------|
| 0.0060  | 0.0011 | 1.72E-08 | 3,032,500 | primary   | -                    |
| -0.0129 | 0.0017 | 6.53E-15 | 3,037,460 | primary   | -                    |
| -0.0078 | 0.0011 | 1.25E-12 | 3,034,960 | primary   | -                    |
| 0.0065  | 0.0011 | 1.33E-09 | 3,035,770 | primary   | -                    |
| -0.0105 | 0.0011 | 1.61E-21 | 3,037,410 | primary   | -                    |
| 0.0102  | 0.0013 | 1.40E-15 | 3,037,450 | primary   | rs10279655           |
| 0.0069  | 0.0012 | 9.10E-09 | 3,023,230 | secondary | N/A                  |
| -0.0102 | 0.0013 | 4.84E-15 | 3,037,450 | primary   | -                    |
| 0.0088  | 0.0013 | 2.05E-12 | 3,037,470 | primary   | -                    |
| 0.0125  | 0.0011 | 4.36E-31 | 3,037,420 | primary   | -                    |
| -0.0089 | 0.0011 | 3.39E-15 | 3,037,490 | primary   | -                    |
| -0.0137 | 0.0019 | 1.16E-12 | 3,012,680 | primary   | -                    |
| 0.0077  | 0.0011 | 6.12E-12 | 3,037,480 | primary   | -                    |
| 0.0098  | 0.0012 | 8.47E-16 | 3,035,760 | primary   | -                    |
| -0.0080 | 0.0011 | 6.22E-13 | 3,035,770 | primary   | -                    |
| -0.0110 | 0.0011 | 2.72E-22 | 3,033,190 | primary   | -                    |
| -0.0071 | 0.0011 | 4.16E-10 | 3,035,790 | primary   | -                    |
| -0.0087 | 0.0013 | 2.83E-11 | 3,024,460 | primary   | rs1050331            |
| 0.0074  | 0.0012 | 1.53E-09 | 3,037,410 | secondary | N/A                  |
| -0.0088 | 0.0013 | 2.26E-11 | 3,024,950 | primary   | -                    |
| -0.0156 | 0.0026 | 2.95E-09 | 3,012,570 | primary   | -                    |
| 0.0084  | 0.0011 | 2.64E-15 | 3,037,460 | primary   | -                    |
| 0.0113  | 0.0012 | 1.07E-20 | 3,000,800 | primary   | -                    |
| -0.0520 | 0.0090 | 6.72E-09 | 2,916,650 | primary   | -                    |
| -0.0096 | 0.0012 | 3.53E-16 | 3,020,240 | primary   | -                    |
| 0.0124  | 0.0018 | 3.45E-12 | 3,020,780 | primary   | -                    |
| -0.0064 | 0.0011 | 1.35E-08 | 3,007,300 | primary   | -                    |
| 0.0084  | 0.0012 | 9.45E-13 | 3,033,320 | primary   | -                    |
| -0.0123 | 0.0022 | 1.78E-08 | 3,035,070 | primary   | -                    |
| -0.0082 | 0.0011 | 2.03E-13 | 3,037,490 | primary   | -                    |
| 0.0130  | 0.0014 | 9.61E-20 | 3,037,420 | primary   | -                    |
| -0.0097 | 0.0012 | 6.99E-17 | 3,024,920 | primary   | -                    |
| -0.0076 | 0.0012 | 4.52E-11 | 3,032,500 | primary   | -                    |
| 0.0079  | 0.0012 | 5.30E-11 | 3,035,680 | secondary | N/A                  |
| 0.0126  | 0.0011 | 1.12E-29 | 3,037,320 | primary   | rs757895             |
| -0.0548 | 0.0086 | 1.97E-10 | 2,713,320 | primary   | -                    |
| 0.0127  | 0.0011 | 1.40E-32 | 3,030,240 | primary   | -                    |
| -0.0066 | 0.0011 | 7.57E-10 | 3,023,970 | primary   | -                    |
| 0.0177  | 0.0015 | 1.76E-30 | 3,033,280 | primary   | -                    |
| 0.0067  | 0.0011 | 5.13E-10 | 3,035,790 | primary   | -                    |
| -0.0433 | 0.0067 | 8.46E-11 | 2,713,340 | primary   | -                    |
| 0.0379  | 0.0052 | 2.71E-13 | 2,992,340 | primary   | -                    |
| -0.0129 | 0.0013 | 7.58E-23 | 3,037,430 | secondary | N/A                  |
| -0.0334 | 0.0021 | 1.60E-58 | 2,713,320 | primary   | rs7796089,rs62462737 |
| 0.0293  | 0.0026 | 7.37E-29 | 3,022,500 | secondary | N/A                  |
| -0.0075 | 0.0011 | 6.90E-11 | 3,037,460 | primary   | -                    |
| 0.0091  | 0.0011 | 6.91E-18 | 3,035,750 | primary   | -                    |
| 0.0111  | 0.0019 | 5.97E-09 | 2,272,200 | primary   | -                    |

|         |        |          |           |           |            |
|---------|--------|----------|-----------|-----------|------------|
| -0.0106 | 0.0011 | 2.31E-21 | 3,037,440 | primary   | -          |
| 0.0118  | 0.0019 | 3.17E-10 | 3,037,490 | primary   | -          |
| -0.0073 | 0.0012 | 3.93E-09 | 3,037,490 | primary   | -          |
| 0.0153  | 0.0023 | 3.63E-11 | 3,004,030 | primary   | -          |
| 0.0081  | 0.0011 | 1.29E-12 | 3,037,470 | primary   | -          |
| -0.0118 | 0.0012 | 1.10E-21 | 3,037,430 | primary   | -          |
| -0.0118 | 0.0011 | 1.21E-26 | 3,035,720 | primary   | -          |
| 0.0087  | 0.0012 | 1.55E-13 | 3,037,470 | primary   | -          |
| 0.0083  | 0.0012 | 7.18E-13 | 3,037,500 | primary   | -          |
| 0.0090  | 0.0016 | 1.27E-08 | 3,037,510 | primary   | -          |
| 0.0064  | 0.0011 | 2.56E-09 | 3,035,040 | primary   | -          |
| 0.0100  | 0.0013 | 7.72E-14 | 3,036,910 | primary   | -          |
| -0.0079 | 0.0014 | 7.01E-09 | 3,011,780 | primary   | -          |
| -0.0100 | 0.0011 | 2.66E-20 | 3,030,380 | primary   | -          |
| -0.0122 | 0.0019 | 8.21E-11 | 3,023,240 | primary   | -          |
| 0.0157  | 0.0011 | 1.10E-45 | 3,035,520 | primary   | -          |
| -0.0070 | 0.0011 | 1.23E-10 | 3,037,460 | primary   | -          |
| -0.0084 | 0.0012 | 1.22E-12 | 3,037,430 | primary   | -          |
| -0.0065 | 0.0011 | 1.48E-09 | 3,037,460 | primary   | -          |
| -0.0129 | 0.0015 | 1.39E-17 | 2,998,720 | primary   | -          |
| 0.0113  | 0.0014 | 1.60E-16 | 3,037,430 | primary   | -          |
| 0.0094  | 0.0012 | 8.44E-15 | 3,037,420 | primary   | -          |
| 0.0233  | 0.0042 | 2.89E-08 | 3,002,260 | primary   | -          |
| -0.0073 | 0.0011 | 5.78E-11 | 3,035,740 | primary   | -          |
| 0.0132  | 0.0013 | 1.05E-22 | 3,027,610 | primary   | -          |
| -0.0109 | 0.0015 | 4.96E-14 | 3,033,340 | primary   | -          |
| -0.0108 | 0.0014 | 1.81E-14 | 3,035,750 | primary   | -          |
| 0.0103  | 0.0013 | 9.78E-16 | 3,028,640 | primary   | -          |
| 0.0113  | 0.0015 | 4.75E-14 | 2,555,600 | primary   | -          |
| -0.0086 | 0.0011 | 5.90E-15 | 3,027,220 | primary   | -          |
| 0.0193  | 0.0029 | 1.54E-11 | 3,033,810 | primary   | -          |
| 0.0100  | 0.0012 | 6.40E-18 | 3,037,410 | primary   | -          |
| -0.0094 | 0.0014 | 1.03E-11 | 3,000,740 | primary   | rs73186008 |
| 0.0105  | 0.0017 | 1.03E-09 | 2,967,710 | secondary | N/A        |
| 0.0075  | 0.0011 | 1.15E-12 | 3,037,470 | primary   | -          |
| -0.0159 | 0.0023 | 2.53E-12 | 3,035,050 | primary   | -          |
| -0.0064 | 0.0011 | 2.55E-09 | 3,037,500 | primary   | -          |
| 0.0098  | 0.0012 | 1.96E-16 | 3,037,480 | primary   | -          |
| 0.0067  | 0.0011 | 7.82E-10 | 3,037,520 | primary   | -          |
| -0.0148 | 0.0015 | 1.30E-22 | 3,037,450 | primary   | -          |
| 0.0089  | 0.0011 | 4.87E-16 | 3,037,430 | primary   | -          |
| 0.0082  | 0.0011 | 9.55E-14 | 3,035,770 | primary   | -          |
| -0.0068 | 0.0011 | 1.22E-09 | 3,031,540 | primary   | -          |
| -0.0101 | 0.0014 | 6.70E-14 | 3,031,750 | primary   | -          |
| 0.0066  | 0.0011 | 7.08E-10 | 3,037,480 | primary   | -          |
| 0.0121  | 0.0017 | 8.43E-13 | 3,000,840 | primary   | -          |
| 0.0075  | 0.0011 | 1.60E-11 | 3,037,460 | primary   | -          |
| -0.0100 | 0.0011 | 2.63E-21 | 3,037,410 | primary   | -          |

|         |        |          |           |           |                               |
|---------|--------|----------|-----------|-----------|-------------------------------|
| 0.0072  | 0.0013 | 3.07E-08 | 2,981,050 | primary   | -                             |
| -0.0103 | 0.0011 | 1.23E-20 | 3,024,870 | primary   | -                             |
| 0.0100  | 0.0014 | 6.21E-12 | 3,037,470 | primary   | -                             |
| 0.0073  | 0.0011 | 1.50E-11 | 3,020,750 | primary   | -                             |
| 0.0060  | 0.0011 | 1.24E-08 | 3,037,500 | primary   | -                             |
| 0.0085  | 0.0011 | 7.16E-16 | 3,037,440 | primary   | -                             |
| 0.0094  | 0.0011 | 2.37E-17 | 3,037,440 | primary   | -                             |
| -0.0078 | 0.0012 | 6.67E-11 | 3,037,400 | primary   | rs79436018                    |
| 0.0323  | 0.0035 | 1.20E-20 | 2,287,240 | primary   | -                             |
| 0.0108  | 0.0018 | 1.91E-09 | 3,035,740 | secondary | N/A                           |
| 0.0194  | 0.0012 | 1.52E-60 | 3,024,760 | primary   | -                             |
| 0.0098  | 0.0014 | 1.12E-11 | 2,998,700 | primary   | -                             |
| 0.0082  | 0.0011 | 2.20E-14 | 3,037,490 | primary   | -                             |
| 0.0093  | 0.0011 | 2.54E-16 | 3,037,420 | primary   | -                             |
| 0.0123  | 0.0011 | 7.22E-29 | 3,037,420 | primary   | -                             |
| 0.0103  | 0.0011 | 2.24E-22 | 3,034,990 | primary   | -                             |
| 0.0124  | 0.0011 | 1.26E-29 | 3,037,430 | primary   | -                             |
| 0.0064  | 0.0011 | 1.01E-08 | 3,037,470 | primary   | -                             |
| -0.0079 | 0.0011 | 1.31E-13 | 3,037,440 | primary   | -                             |
| 0.0073  | 0.0012 | 2.57E-09 | 3,018,300 | primary   | -                             |
| 0.0085  | 0.0015 | 1.25E-08 | 3,035,780 | primary   | -                             |
| -0.0067 | 0.0011 | 1.25E-09 | 3,037,490 | primary   | -                             |
| 0.0073  | 0.0011 | 1.07E-10 | 3,024,900 | primary   | -                             |
| 0.0096  | 0.0012 | 1.17E-14 | 3,032,770 | primary   | -                             |
| 0.0063  | 0.0011 | 1.33E-08 | 3,035,640 | primary   | -                             |
| 0.0126  | 0.0011 | 8.34E-32 | 3,037,430 | primary   | -                             |
| 0.0097  | 0.0014 | 9.77E-12 | 3,037,470 | primary   | -                             |
| 0.0243  | 0.0043 | 1.67E-08 | 2,998,990 | primary   | -                             |
| -0.0075 | 0.0011 | 3.60E-11 | 3,035,230 | primary   | -                             |
| 0.0063  | 0.0011 | 3.10E-09 | 3,019,210 | primary   | -                             |
| 0.0102  | 0.0011 | 7.67E-21 | 3,035,740 | primary   | -                             |
| 0.0075  | 0.0011 | 4.31E-12 | 3,035,200 | primary   | -                             |
| -0.0067 | 0.0012 | 1.81E-08 | 3,037,470 | primary   | -                             |
| 0.0074  | 0.0012 | 3.17E-10 | 3,000,820 | primary   | -                             |
| -0.0092 | 0.0014 | 1.37E-10 | 3,037,470 | primary   | -                             |
| 0.0133  | 0.0011 | 1.05E-32 | 3,037,380 | primary   | -                             |
| 0.0084  | 0.0013 | 2.17E-10 | 3,035,760 | primary   | -                             |
| 0.0095  | 0.0011 | 5.42E-18 | 3,034,870 | primary   | -                             |
| 0.0112  | 0.0013 | 3.25E-18 | 3,034,970 | primary   | rs1521195,rs7814757,rs1692821 |
| -0.0104 | 0.0014 | 7.19E-13 | 3,036,660 | secondary | N/A                           |
| -0.0124 | 0.0015 | 4.35E-17 | 3,036,630 | primary   | -                             |
| -0.0093 | 0.0012 | 2.59E-14 | 3,036,670 | secondary | N/A                           |
| -0.0104 | 0.0013 | 3.13E-16 | 3,036,690 | secondary | N/A                           |
| 0.0082  | 0.0014 | 4.11E-09 | 3,032,540 | primary   | -                             |
| -0.0169 | 0.0014 | 4.89E-34 | 3,036,580 | primary   | -                             |
| -0.0082 | 0.0011 | 7.18E-15 | 3,034,940 | primary   | -                             |
| 0.0086  | 0.0013 | 1.35E-10 | 3,036,650 | primary   | -                             |
| -0.0089 | 0.0011 | 3.38E-16 | 3,036,660 | primary   | -                             |

|         |        |          |           |           |           |
|---------|--------|----------|-----------|-----------|-----------|
| 0.0074  | 0.0011 | 2.73E-12 | 3,019,180 | primary   | -         |
| 0.0436  | 0.0076 | 1.12E-08 | 2,949,460 | primary   | -         |
| -0.0067 | 0.0011 | 2.38E-09 | 3,036,680 | primary   | -         |
| 0.0060  | 0.0011 | 1.09E-08 | 3,030,770 | primary   | -         |
| 0.0068  | 0.0011 | 4.73E-10 | 3,036,660 | primary   | -         |
| -0.0066 | 0.0011 | 1.65E-09 | 3,034,960 | primary   | -         |
| -0.0073 | 0.0011 | 1.21E-11 | 3,034,930 | primary   | -         |
| 0.0064  | 0.0011 | 1.31E-09 | 3,034,390 | primary   | -         |
| -0.0073 | 0.0011 | 6.97E-11 | 3,018,000 | primary   | -         |
| -0.0061 | 0.0011 | 2.28E-08 | 3,036,670 | primary   | -         |
| 0.0081  | 0.0012 | 6.26E-12 | 2,979,970 | primary   | -         |
| 0.0105  | 0.0013 | 5.18E-17 | 3,016,810 | primary   | -         |
| -0.0073 | 0.0011 | 2.04E-11 | 3,036,680 | primary   | -         |
| 0.0126  | 0.0014 | 7.59E-19 | 3,021,600 | primary   | -         |
| 0.0118  | 0.0011 | 1.20E-28 | 3,036,630 | primary   | -         |
| 0.0118  | 0.0013 | 3.72E-19 | 3,033,400 | primary   | -         |
| 0.0102  | 0.0014 | 1.67E-12 | 3,034,220 | primary   | -         |
| -0.0108 | 0.0012 | 1.77E-18 | 3,023,990 | primary   | rs2725385 |
| -0.0098 | 0.0013 | 2.33E-13 | 3,036,610 | secondary | N/A       |
| -0.0097 | 0.0011 | 2.02E-19 | 3,036,670 | primary   | -         |
| -0.0076 | 0.0013 | 2.93E-09 | 3,036,660 | primary   | -         |
| 0.0117  | 0.0019 | 3.63E-10 | 3,024,150 | primary   | -         |
| -0.0068 | 0.0011 | 2.39E-10 | 3,024,140 | primary   | -         |
| 0.0091  | 0.0013 | 3.61E-12 | 3,032,540 | primary   | -         |
| 0.0075  | 0.0011 | 1.27E-12 | 3,035,110 | primary   | -         |
| -0.0116 | 0.0015 | 4.50E-14 | 3,019,970 | primary   | -         |
| -0.0169 | 0.0025 | 1.41E-11 | 3,033,930 | primary   | -         |
| 0.0131  | 0.0011 | 2.44E-35 | 3,019,910 | primary   | -         |
| 0.0144  | 0.0025 | 4.53E-09 | 3,036,660 | primary   | -         |
| -0.0144 | 0.0016 | 1.92E-18 | 3,032,480 | primary   | -         |
| 0.0108  | 0.0011 | 2.28E-24 | 3,031,660 | primary   | -         |
| -0.0100 | 0.0013 | 1.29E-14 | 3,036,690 | primary   | -         |
| 0.0076  | 0.0012 | 4.12E-11 | 2,713,290 | primary   | -         |
| 0.0163  | 0.0025 | 1.12E-10 | 2,964,570 | primary   | -         |
| 0.0077  | 0.0011 | 4.41E-12 | 3,036,680 | primary   | -         |
| -0.0085 | 0.0012 | 3.74E-13 | 3,036,640 | primary   | -         |
| -0.0091 | 0.0014 | 4.81E-11 | 2,924,400 | primary   | -         |
| -0.0081 | 0.0011 | 5.78E-13 | 3,036,640 | primary   | -         |
| 0.0063  | 0.0011 | 3.80E-09 | 3,031,700 | primary   | -         |
| -0.0084 | 0.0011 | 2.60E-14 | 3,034,920 | primary   | -         |
| 0.0088  | 0.0014 | 1.27E-10 | 3,034,980 | primary   | -         |
| -0.0085 | 0.0011 | 1.26E-14 | 3,033,250 | primary   | -         |
| -0.0090 | 0.0011 | 1.26E-17 | 3,034,910 | primary   | -         |
| -0.0137 | 0.0016 | 3.25E-17 | 3,036,660 | primary   | -         |
| -0.0136 | 0.0024 | 8.50E-09 | 3,019,630 | primary   | -         |
| -0.0181 | 0.0032 | 1.59E-08 | 2,999,560 | primary   | -         |
| 0.0089  | 0.0011 | 2.78E-16 | 3,036,640 | primary   | -         |
| -0.0151 | 0.0016 | 3.83E-20 | 3,020,750 | secondary | N/A       |

|         |        |          |           |         |           |
|---------|--------|----------|-----------|---------|-----------|
| -0.0153 | 0.0013 | 1.41E-32 | 3,023,550 | primary | rs2312427 |
| 0.0080  | 0.0012 | 1.07E-11 | 3,036,670 | primary | -         |
| -0.0074 | 0.0011 | 3.22E-11 | 3,036,680 | primary | -         |
| 0.0118  | 0.0013 | 1.90E-18 | 3,008,780 | primary | -         |
| 0.0085  | 0.0011 | 3.37E-15 | 2,999,470 | primary | -         |
| -0.0077 | 0.0012 | 5.20E-11 | 2,974,890 | primary | -         |
| -0.0090 | 0.0011 | 3.64E-17 | 3,036,080 | primary | -         |
| 0.0095  | 0.0011 | 1.14E-18 | 3,036,580 | primary | -         |
| -0.0070 | 0.0011 | 7.20E-10 | 3,031,700 | primary | -         |
| 0.0075  | 0.0011 | 1.07E-11 | 3,000,040 | primary | -         |
| 0.0076  | 0.0011 | 1.94E-11 | 3,034,950 | primary | -         |
| 0.0161  | 0.0028 | 5.87E-09 | 3,035,830 | primary | -         |
| 0.0088  | 0.0012 | 3.43E-13 | 3,029,580 | primary | -         |
| -0.0100 | 0.0013 | 8.10E-15 | 3,036,640 | primary | -         |
| 0.0091  | 0.0012 | 3.13E-15 | 3,033,310 | primary | -         |
| 0.0080  | 0.0011 | 1.84E-12 | 3,034,910 | primary | -         |
| 0.0091  | 0.0014 | 3.04E-11 | 3,036,680 | primary | -         |
| 0.0112  | 0.0013 | 3.04E-17 | 2,550,890 | primary | -         |
| 0.0102  | 0.0012 | 1.03E-18 | 3,036,650 | primary | -         |
| -0.0077 | 0.0011 | 7.18E-12 | 3,036,670 | primary | -         |
| 0.0063  | 0.0011 | 3.23E-08 | 3,036,690 | primary | -         |
| 0.0095  | 0.0011 | 7.32E-17 | 3,036,660 | primary | -         |
| 0.0068  | 0.0012 | 1.99E-08 | 3,036,700 | primary | -         |
| -0.0088 | 0.0011 | 1.32E-16 | 3,036,650 | primary | -         |
| 0.0081  | 0.0013 | 4.30E-10 | 3,036,650 | primary | -         |
| -0.0102 | 0.0013 | 2.63E-15 | 3,036,650 | primary | -         |
| 0.0134  | 0.0015 | 2.72E-19 | 3,036,620 | primary | -         |
| 0.0071  | 0.0011 | 3.32E-11 | 3,036,660 | primary | -         |
| 0.0154  | 0.0018 | 4.38E-18 | 3,036,640 | primary | -         |
| 0.0080  | 0.0013 | 1.38E-09 | 3,034,090 | primary | -         |
| 0.0076  | 0.0013 | 2.17E-09 | 2,998,330 | primary | -         |
| 0.0076  | 0.0011 | 9.13E-12 | 3,036,690 | primary | -         |
| -0.0318 | 0.0054 | 3.20E-09 | 2,988,880 | primary | -         |
| 0.0112  | 0.0018 | 4.56E-10 | 3,036,670 | primary | -         |
| -0.0063 | 0.0011 | 1.07E-08 | 3,034,980 | primary | -         |
| -0.0197 | 0.0031 | 3.85E-10 | 2,879,480 | primary | -         |
| -0.0119 | 0.0014 | 1.32E-17 | 3,031,650 | primary | -         |
| -0.0093 | 0.0012 | 2.31E-15 | 3,036,630 | primary | -         |
| 0.0139  | 0.0022 | 1.81E-10 | 3,033,270 | primary | -         |
| 0.0136  | 0.0016 | 1.74E-16 | 3,034,200 | primary | -         |
| 0.0077  | 0.0012 | 3.61E-10 | 3,036,680 | primary | -         |
| 0.0082  | 0.0011 | 1.24E-14 | 3,034,390 | primary | -         |
| 0.0060  | 0.0011 | 3.09E-08 | 3,036,670 | primary | -         |
| -0.0086 | 0.0012 | 5.12E-12 | 3,024,120 | primary | -         |
| 0.0103  | 0.0011 | 7.72E-22 | 3,024,090 | primary | -         |
| 0.0065  | 0.0011 | 1.08E-09 | 3,034,960 | primary | -         |
| -0.0084 | 0.0012 | 2.45E-13 | 3,036,110 | primary | -         |
| -0.0109 | 0.0011 | 4.86E-25 | 3,036,590 | primary | -         |

|         |        |          |           |         |   |
|---------|--------|----------|-----------|---------|---|
| 0.0080  | 0.0011 | 2.38E-14 | 3,036,680 | primary | - |
| 0.0118  | 0.0013 | 1.17E-20 | 3,036,670 | primary | - |
| -0.0064 | 0.0011 | 1.33E-09 | 3,036,670 | primary | - |
| -0.0077 | 0.0011 | 1.05E-11 | 3,036,630 | primary | - |
| -0.0107 | 0.0017 | 2.79E-10 | 3,036,630 | primary | - |
| -0.0065 | 0.0011 | 7.50E-10 | 3,034,960 | primary | - |
| -0.0067 | 0.0011 | 1.82E-10 | 3,036,700 | primary | - |
| 0.0093  | 0.0013 | 9.82E-13 | 2,981,960 | primary | - |
| 0.0086  | 0.0012 | 9.37E-14 | 3,034,930 | primary | - |
| 0.0100  | 0.0017 | 4.54E-09 | 2,595,570 | primary | - |
| 0.0059  | 0.0011 | 2.87E-08 | 3,036,690 | primary | - |
| -0.0103 | 0.0014 | 2.29E-14 | 2,999,990 | primary | - |
| -0.0077 | 0.0011 | 3.43E-12 | 3,036,660 | primary | - |
| -0.0116 | 0.0017 | 9.05E-12 | 3,015,340 | primary | - |
| 0.0135  | 0.0011 | 7.26E-34 | 3,034,650 | primary | - |
| 0.0106  | 0.0011 | 2.20E-22 | 3,032,940 | primary | - |
| -0.0071 | 0.0011 | 4.18E-11 | 2,963,670 | primary | - |
| -0.0093 | 0.0011 | 1.03E-18 | 3,031,950 | primary | - |
| -0.0129 | 0.0020 | 2.67E-10 | 2,997,380 | primary | - |
| 0.0393  | 0.0040 | 1.23E-22 | 3,018,450 | primary | - |
| 0.0084  | 0.0013 | 9.88E-11 | 3,011,000 | primary | - |
| -0.0081 | 0.0011 | 2.94E-14 | 3,036,110 | primary | - |
| -0.0068 | 0.0011 | 5.71E-10 | 3,004,010 | primary | - |
| 0.0160  | 0.0011 | 1.35E-51 | 3,026,840 | primary | - |
| 0.0077  | 0.0011 | 2.05E-12 | 3,035,690 | primary | - |
| 0.0137  | 0.0012 | 7.53E-33 | 3,034,850 | primary | - |
| -0.0086 | 0.0011 | 1.82E-14 | 3,037,440 | primary | - |
| 0.0158  | 0.0026 | 2.44E-09 | 3,024,920 | primary | - |
| 0.0080  | 0.0012 | 1.75E-10 | 3,037,460 | primary | - |
| -0.0075 | 0.0011 | 3.08E-12 | 3,037,450 | primary | - |
| -0.0066 | 0.0012 | 3.58E-08 | 3,037,470 | primary | - |
| -0.0121 | 0.0018 | 2.45E-11 | 2,272,200 | primary | - |
| 0.0104  | 0.0014 | 2.21E-13 | 3,037,440 | primary | - |
| 0.0074  | 0.0010 | 1.83E-12 | 3,037,440 | primary | - |
| 0.0064  | 0.0011 | 1.31E-09 | 3,037,490 | primary | - |
| 0.0084  | 0.0011 | 5.62E-14 | 3,036,660 | primary | - |
| 0.0084  | 0.0012 | 7.15E-13 | 3,000,060 | primary | - |
| 0.0069  | 0.0012 | 2.57E-09 | 3,036,640 | primary | - |
| 0.0095  | 0.0011 | 1.42E-18 | 3,036,620 | primary | - |
| 0.0076  | 0.0012 | 1.02E-09 | 3,034,240 | primary | - |
| -0.0067 | 0.0011 | 5.28E-09 | 3,016,730 | primary | - |
| -0.0062 | 0.0011 | 6.88E-09 | 3,036,690 | primary | - |
| 0.0226  | 0.0015 | 7.20E-53 | 3,036,530 | primary | - |
| -0.0098 | 0.0016 | 3.45E-10 | 3,022,440 | primary | - |
| 0.0487  | 0.0085 | 1.13E-08 | 2,890,940 | primary | - |
| 0.0097  | 0.0011 | 1.96E-19 | 3,036,650 | primary | - |
| 0.0064  | 0.0011 | 1.18E-08 | 3,034,940 | primary | - |
| 0.0098  | 0.0011 | 7.03E-21 | 3,036,640 | primary | - |

|         |        |           |           |           |            |
|---------|--------|-----------|-----------|-----------|------------|
| -0.0066 | 0.0011 | 4.82E-10  | 3,036,690 | primary   | -          |
| 0.0093  | 0.0011 | 1.45E-18  | 3,021,670 | primary   | -          |
| -0.0103 | 0.0014 | 1.12E-12  | 3,024,130 | primary   | -          |
| 0.0930  | 0.0159 | 4.77E-09  | 2,771,550 | primary   | -          |
| -0.0070 | 0.0011 | 2.61E-11  | 3,033,390 | primary   | -          |
| 0.0071  | 0.0011 | 6.20E-11  | 3,034,700 | primary   | -          |
| 0.0255  | 0.0016 | 7.88E-56  | 3,024,480 | secondary | N/A        |
| 0.0306  | 0.0012 | 3.76E-154 | 3,023,810 | primary   | rs10965791 |
| 0.0071  | 0.0013 | 2.56E-08  | 3,036,730 | primary   | -          |
| -0.0142 | 0.0025 | 1.48E-08  | 3,000,740 | primary   | -          |
| 0.0155  | 0.0014 | 8.78E-27  | 3,021,950 | primary   | -          |
| -0.0093 | 0.0016 | 1.42E-08  | 3,023,610 | primary   | -          |
| -0.0059 | 0.0011 | 1.88E-08  | 3,036,150 | primary   | -          |
| -0.0068 | 0.0011 | 2.80E-10  | 3,024,160 | primary   | -          |
| 0.0074  | 0.0011 | 4.27E-11  | 3,036,650 | primary   | -          |
| 0.0081  | 0.0013 | 1.22E-09  | 3,036,690 | primary   | -          |
| 0.0104  | 0.0016 | 5.52E-11  | 3,004,480 | primary   | -          |
| -0.0074 | 0.0011 | 1.16E-11  | 3,036,700 | primary   | -          |
| 0.0064  | 0.0011 | 1.25E-09  | 3,036,690 | primary   | -          |
| 0.0084  | 0.0011 | 2.80E-15  | 3,034,960 | primary   | -          |
| -0.0104 | 0.0011 | 2.14E-22  | 3,036,600 | primary   | -          |
| -0.0174 | 0.0027 | 6.89E-11  | 3,022,690 | primary   | -          |
| 0.0183  | 0.0027 | 5.14E-12  | 3,036,360 | primary   | -          |
| 0.0106  | 0.0012 | 6.99E-19  | 3,036,640 | primary   | -          |
| -0.0105 | 0.0014 | 4.51E-13  | 3,036,700 | primary   | -          |
| 0.0095  | 0.0013 | 1.87E-13  | 3,036,650 | primary   | -          |
| 0.0072  | 0.0012 | 1.88E-09  | 3,036,660 | primary   | -          |
| 0.0103  | 0.0011 | 1.59E-21  | 3,034,960 | primary   | -          |
| 0.0132  | 0.0022 | 1.45E-09  | 3,035,780 | primary   | -          |
| -0.0100 | 0.0014 | 1.79E-12  | 3,034,930 | primary   | -          |
| -0.0094 | 0.0011 | 1.33E-18  | 3,036,600 | primary   | -          |
| 0.0095  | 0.0015 | 5.91E-10  | 3,036,650 | primary   | -          |
| -0.0072 | 0.0011 | 1.04E-10  | 3,036,660 | primary   | -          |
| -0.0129 | 0.0021 | 1.22E-09  | 3,036,670 | primary   | -          |
| -0.0102 | 0.0017 | 1.96E-09  | 3,036,690 | primary   | -          |
| 0.0071  | 0.0011 | 5.96E-11  | 3,034,960 | primary   | -          |
| 0.0106  | 0.0013 | 2.31E-17  | 3,036,650 | primary   | -          |
| 0.0099  | 0.0015 | 1.36E-10  | 3,036,690 | primary   | -          |
| -0.0118 | 0.0012 | 8.91E-22  | 3,036,620 | primary   | -          |
| 0.0133  | 0.0016 | 5.47E-17  | 3,034,920 | primary   | -          |
| 0.0125  | 0.0011 | 2.61E-32  | 3,036,610 | primary   | -          |
| 0.0076  | 0.0012 | 1.81E-10  | 3,036,610 | secondary | N/A        |
| -0.0088 | 0.0012 | 6.96E-13  | 3,036,620 | primary   | rs10821123 |
| 0.0086  | 0.0011 | 2.94E-15  | 3,021,690 | primary   | -          |
| -0.0073 | 0.0011 | 8.86E-11  | 2,987,670 | primary   | -          |
| 0.0164  | 0.0015 | 3.50E-29  | 3,021,620 | primary   | -          |
| 0.0106  | 0.0011 | 2.07E-21  | 3,034,940 | primary   | -          |
| -0.0132 | 0.0018 | 1.01E-13  | 3,024,110 | primary   | -          |



|         |        |          |           |         |   |
|---------|--------|----------|-----------|---------|---|
| 0.0212  | 0.0036 | 3.57E-09 | 2,942,760 | primary | - |
| -0.0066 | 0.0011 | 2.58E-09 | 3,022,440 | primary | - |
| -0.0073 | 0.0012 | 2.83E-10 | 3,036,650 | primary | - |
| -0.0086 | 0.0011 | 5.09E-16 | 3,036,630 | primary | - |
| 0.0124  | 0.0021 | 4.15E-09 | 3,014,500 | primary | - |
| 0.0130  | 0.0018 | 2.06E-13 | 3,035,750 | primary | - |
| 0.0233  | 0.0028 | 5.79E-17 | 3,033,110 | primary | - |
| 0.0168  | 0.0015 | 3.21E-29 | 3,036,620 | primary | - |
| -0.0076 | 0.0011 | 1.60E-11 | 3,036,680 | primary | - |
| -0.0123 | 0.0011 | 2.04E-29 | 3,036,620 | primary | - |
| -0.0066 | 0.0011 | 1.13E-09 | 3,034,980 | primary | - |
| -0.0064 | 0.0011 | 2.36E-09 | 3,024,120 | primary | - |
| -0.0060 | 0.0011 | 2.35E-08 | 3,036,670 | primary | - |
| -0.0079 | 0.0014 | 6.14E-09 | 3,034,050 | primary | - |
| -0.0091 | 0.0012 | 1.14E-14 | 3,036,670 | primary | - |
| 0.0066  | 0.0011 | 8.88E-10 | 3,036,680 | primary | - |
| -0.0067 | 0.0011 | 1.32E-09 | 3,036,680 | primary | - |
| -0.0062 | 0.0011 | 1.69E-08 | 3,036,710 | primary | - |
| 0.0090  | 0.0013 | 9.68E-13 | 3,036,680 | primary | - |
| -0.0090 | 0.0012 | 3.27E-13 | 3,036,650 | primary | - |
| -0.0139 | 0.0011 | 7.96E-37 | 3,036,560 | primary | - |
| 0.0081  | 0.0011 | 2.21E-13 | 3,036,680 | primary | - |
| -0.0070 | 0.0011 | 6.53E-11 | 3,015,780 | primary | - |
| 0.0067  | 0.0011 | 4.27E-10 | 3,019,960 | primary | - |
| 0.0072  | 0.0011 | 2.46E-11 | 3,022,450 | primary | - |
| -0.0098 | 0.0011 | 1.91E-17 | 3,032,530 | primary | - |
| 0.0142  | 0.0011 | 5.95E-41 | 3,036,580 | primary | - |
| -0.0082 | 0.0012 | 4.23E-11 | 3,014,230 | primary | - |
| 0.0134  | 0.0012 | 2.49E-27 | 3,036,610 | primary | - |
| -0.0084 | 0.0012 | 2.62E-12 | 3,034,970 | primary | - |
| 0.0133  | 0.0022 | 2.91E-09 | 3,033,340 | primary | - |
| 0.0080  | 0.0011 | 3.32E-14 | 3,034,180 | primary | - |
| 0.0107  | 0.0014 | 7.24E-14 | 3,036,650 | primary | - |
| 0.0069  | 0.0011 | 9.02E-11 | 3,036,680 | primary | - |
| 0.0078  | 0.0011 | 1.40E-13 | 3,033,410 | primary | - |
| -0.0112 | 0.0015 | 1.10E-13 | 3,028,810 | primary | - |
| 0.0068  | 0.0011 | 5.79E-10 | 3,027,580 | primary | - |
| -0.0152 | 0.0011 | 1.76E-40 | 3,036,580 | primary | - |
| 0.0097  | 0.0013 | 1.47E-14 | 3,036,710 | primary | - |
| 0.0123  | 0.0012 | 2.33E-23 | 3,036,610 | primary | - |
| -0.0094 | 0.0013 | 1.55E-12 | 3,036,680 | primary | - |
| -0.0088 | 0.0014 | 2.24E-10 | 3,032,000 | primary | - |
| -0.0080 | 0.0013 | 1.10E-09 | 3,034,720 | primary | - |
| -0.0083 | 0.0012 | 2.08E-11 | 2,984,580 | primary | - |
| 0.0111  | 0.0011 | 4.58E-24 | 3,011,700 | primary | - |
| -0.0201 | 0.0017 | 3.20E-34 | 2,841,830 | primary | - |
| 0.0085  | 0.0013 | 8.26E-11 | 3,033,920 | primary | - |

---



**Supplementary Table 3. Predictive power of *EduYears* PGIs made using clumping and thresholding (C+T; with different *P* values)**

| Methodology | Set of SNPs                      | AddHealth (N=5,653) |              |               | HRS (N=10,843)     |              |
|-------------|----------------------------------|---------------------|--------------|---------------|--------------------|--------------|
|             |                                  | Incremental- $R^2$  | 95% CI - low | 95% CI - high | Incremental- $R^2$ | 95% CI - low |
| C+T         | $P < 5e-8$                       | 9.1%                | 7.7%         | 10.7%         | 7.0%               | 6.1%         |
|             | $P < 5e-5$                       | 11.8%               | 10.3%        | 13.3%         | 9.3%               | 8.2%         |
|             | $P < 5e-3$                       | 13.5%               | 11.8%        | 15.1%         | 10.9%              | 9.7%         |
|             | $P < 1$                          | 12.7%               | 11.2%        | 14.3%         | 10.4%              | 9.1%         |
| SBayesR     | 2,548,339 pruned common variants | 17.0%               | 15.2%        | 18.5%         | 12.9%              | 11.7%        |
| LDpred      | HapMap3                          | 15.8%               | 14.1%        | 17.3%         | 12.0%              | 10.8%        |

*Notes*: "C+T" is clumping and thresholding. All C+T PGIs were made with a clumping  $r^2$  threshold of 0.1. The SBayesR PGI was made using 2,548,339 pruned common SNPs from the full UKB European ancestry ( $N \approx 450,000$ ) data set from Lloyd-Jones et al. that were available for analysis excluding HRS, Add Health and WLS. SBayesR was run assuming 4 components in the finite mixture model, with initial mixture proportions  $\pi = (0.95, 0.02, 0.02, 0.01)$  and fixed  $\gamma = (0.0, 0.01, 0.1, 1)$ . The LDpred PGI was made using HapMap3 SNPs and a fraction of causal SNPs equal to 0.1. All analyses include the baseline control variables: sex, birth year, the interaction between sex and birth year, and the first ten principal components of the genetic relatedness matrix. The 95% CIs for incremental  $R^2$  were bootstrapped with 1,000 repetitions each. *P* values on which thresholds were selected are based on two-sided *Z* tests.

**ε thresholds) and SBayesR methodologies**

)

95% CI - high

7.9%

10.2%

11.9%

11.3%

13.9%

12.9%

s made using  
le in our meta-  
e probabilities  
equal to 1. All  
ponents (PCs)  
he SNPs were

**Supplementary Table 4. Predictive power of EduYears Polygenic Index**

| <b>Panel A. National Longitudinal Study of Adolescent to Adult Health (Add Health)</b> |          |                       |                   |                 |                |
|----------------------------------------------------------------------------------------|----------|-----------------------|-------------------|-----------------|----------------|
|                                                                                        | EduYears | Completed High School | Completed College | Grade Retention | Peabody Verbal |
| Regression coefficient                                                                 | 1.33     | 0.06                  | 0.19              | -0.09           | 3.71           |
| Robust S.E.                                                                            | (0.038)  | (0.004)               | (0.006)           | (0.005)         | (0.157)        |
| Mean/Prevalence                                                                        | 14.90    | 92.55%                | 32.48%            | 18.70%          | 104.86         |
| Std. Dev.                                                                              | 3.16     | —                     | —                 | —               | 11.85          |
| Incremental- $R^2$                                                                     | 15.8%    | 7.8%                  | 12.6%             | 5.4%            | 8.7%           |
| 95% CI - low                                                                           | 14.0%    | 6.2%                  | 11.2%             | 4.3%            | 7.3%           |
| 95% CI - high                                                                          | 17.3%    | 9.6%                  | 14.2%             | 6.9%            | 10.0%          |
| $N$                                                                                    | 5,653    | 5,653                 | 5,653             | 5,652           | 5,409          |

**Panel B. Health and Retirement Study (HRS)**

|                        | EduYears | Completed High School | Completed College | Grade Retention | Total Cognition |
|------------------------|----------|-----------------------|-------------------|-----------------|-----------------|
| Regression coefficient | 1.22     | 0.11                  | 0.15              | -0.06           | 0.86            |
| Robust S.E.            | (0.030)  | (0.004)               | (0.004)           | (0.004)         | (0.035)         |
| Mean/Prevalence        | 14.28    | 82.48%                | 25.37%            | 16.16%          | 23.18           |
| Std. Dev.              | 3.22     | —                     | —                 | —               | 4.43            |
| Incremental- $R^2$     | 12.0%    | 8.0%                  | 9.3%              | 2.6%            | 3.1%            |
| 95% CI - low           | 10.8%    | 6.9%                  | 8.3%              | 2.0%            | 2.8%            |
| 95% CI - high          | 12.9%    | 9.1%                  | 10.3%             | 3.2%            | 3.3%            |
| $N$                    | 10,843   | 10,843                | 10,843            | 10,163          | 59,574          |

**Panel C. Wisconsin Longitudinal Study (WLS)**

|                        | Henmon-Nelson | High School Grades Percentile Rank |
|------------------------|---------------|------------------------------------|
| Regression coefficient | 2.90          | 8.01                               |
| Robust Std. Error      | (0.124)       | (0.351)                            |
| Mean/Prevalence        | 58.20         | 53.83                              |
| Std. Dev.              | 11.44         | 28.36                              |
| Incremental- $R^2$     | 6.1%          | 7.7%                               |
| 95% CI - low           | 5.2%          | 6.4%                               |
| 95% CI - high          | 7.1%          | 9.1%                               |
| $N$                    | 8,154         | 5,318                              |

**Notes:** All analyses include the baseline control variables: a full set of dummy variables for year of birth, an indicator variable and the first 10 principal components (PCs) of the variance-covariance matrix of the genetic data. Cognitive performance Incremental  $R^2$  values are displayed for continuous phenotypes; incremental pseudo- $R^2$  values are displayed for binary phenotypes.  $R^2$  were bootstrapped with 1,000 repetitions each. PGIs were constructed with LDpred [1] using HapMap3 SNPs and a fract and standard deviation 1. Phenotypes are not standardized.

## References

[1] B. J. Vilhjálmsson *et al.*, Modeling Linkage Disequilibrium Increases Accuracy of Polygenic Risk Scores. *Am. J. Hum. Ge*

| Overall GPA | Math GPA | Science GPA | Verbal GPA |
|-------------|----------|-------------|------------|
| 0.32        | 0.31     | 0.35        | 0.37       |
| (0.012)     | (0.015)  | (0.016)     | (0.014)    |
| 2.70        | 2.34     | 2.41        | 2.51       |
| 0.81        | 0.94     | 0.96        | 0.93       |
| 12.3%       | 8.4%     | 10.0%       | 12.4%      |
| 10.2%       | 6.7%     | 7.8%        | 10.2%      |
| 13.5%       | 9.7%     | 11.3%       | 13.8%      |
| 4,068       | 4,050    | 4,029       | 4,057      |

| Verbal Cognition | $\Delta$ Total Cognition | $\Delta$ Verbal Cognition | Alzheimer's |
|------------------|--------------------------|---------------------------|-------------|
| 0.45             | 0.02                     | -0.01                     | 0.00        |
| (0.017)          | (0.011)                  | (0.016)                   | (0.002)     |
| 5.97             | -0.60                    | 0.00                      | 3.80%       |
| 1.87             | 3.66                     | 2.13                      | —           |
| 4.7%             | 0.0%                     | 0.0%                      | 0.1%        |
| 4.2%             | 0.0%                     | 0.0%                      | 0.0%        |
| 5.2%             | 0.0%                     | 0.1%                      | 0.4%        |
| 32,395           | 42,705                   | 8,800                     | 9,846       |

$\beta$  for sex, a full set of interactions between sex and year of birth, race measures also control for timing of cognitive assessment.  $\beta$  types. The 95% CIs for incremental  $R^2$  and incremental pseudo- $R^2$  of causal SNPs equal to 1, and standardized to have mean 0

**Supplementary Table 5. European genetic ancestries to African genetic ancestries relative prediction accuracy**

| <b>Phenotype</b>            | <b>Observed Relative accuracy in % (S.E.)</b> | <b>MAF and LD based predicted relative accuracy in %</b> |
|-----------------------------|-----------------------------------------------|----------------------------------------------------------|
| Educational Attainment (EA) | 0.34 (0.94)                                   | 35.0                                                     |
| Height                      | 15.3 (2.1)                                    | 39.4                                                     |
| Body mass Index (BMI)       | 12.0 (4.5)                                    | 38.6                                                     |
| LDL Cholesterol (LDL)       | 40.5 (5.0)                                    | 25.7                                                     |
| HDL Cholesterol (HDL)       | 15.0 (3.1)                                    | 35.8                                                     |
| Triglycerides (TG)          | 16.2 (3.7)                                    | 36.5                                                     |
| Asthma                      | 38.5 (15.5)                                   | 34.0                                                     |
| Type 2 Diabetes (T2D)       | 25.7 (12.7)                                   | 39.2                                                     |
| Hypertension (HTN)          | 27.3 (17.2)                                   | 37.7                                                     |

*Notes:* European genetic ancestries to African genetic ancestries relative prediction accuracy of various polygenic in a European-genetic-ancestries sample of the UK Biobank. S.E. denotes standard errors. S.E. for the observed relative

**Accuracy in the UK Biobank**

| <b>Percentage of Loss of accuracy explained by LD and MAF (S.E.)</b> | <b>Source</b> |
|----------------------------------------------------------------------|---------------|
| 65.2 (0.61)                                                          | This study    |
| 71.5 (1.8)                                                           |               |
| 69.8 (3.6)                                                           |               |
| 124.9 (10.5)                                                         |               |
| 75.5 (2.7)                                                           |               |
| 75.8 (3.3)                                                           | Wang et al.   |
| 107.3 (27.0)                                                         |               |
| 81.8 (14.0)                                                          |               |
| 85.7 (20.3)                                                          |               |

indexes based on genome-wide-significant SNPs identified in the UK Biobank. The loss of accuracy were calculated using the delta method.



**Supplementary Table 6. Predictive power of the EA PGI, the disease-specific PGI, and their combination for various**

| Disease                              | EA PGI                         |              |               | <i>P</i> value for coefficient on the EA PGI | Incremental Nagelkerke's $R^2$ |
|--------------------------------------|--------------------------------|--------------|---------------|----------------------------------------------|--------------------------------|
|                                      | Incremental Nagelkerke's $R^2$ | 95% CI - low | 95% CI - high |                                              |                                |
| <u>Cardiometabolic diseases:</u>     |                                |              |               |                                              |                                |
| Essential (primary) hypertension     | 0.93%                          | 0.88%        | 0.97%         | <1E-300                                      | 2.05%                          |
| Ischaemic heart disease              | 0.85%                          | 0.79%        | 0.91%         | <1E-300                                      | 1.45%                          |
| Myocardial infarction                | 0.89%                          | 0.81%        | 0.98%         | 1.57E-232                                    | 1.81%                          |
| Pure hypercholesterolaemia           | 0.68%                          | 0.62%        | 0.74%         | 7.05E-276                                    | 1.15%                          |
| Type 2 diabetes                      | 1.07%                          | 1.00%        | 1.15%         | <1E-300                                      | 1.61%                          |
| <u>Lung diseases:</u>                |                                |              |               |                                              |                                |
| Asthma                               | 0.42%                          | 0.38%        | 0.46%         | 3.40E-175                                    | 0.87%                          |
| <u>Musculoskeletal diseases:</u>     |                                |              |               |                                              |                                |
| Osteoporosis                         | 0.03%                          | 0.02%        | 0.05%         | 2.98E-08                                     | 0.29%                          |
| Rheumatoid arthritis                 | 0.63%                          | 0.53%        | 0.74%         | 6.21E-86                                     | 1.37%                          |
| <u>Neurological diseases:</u>        |                                |              |               |                                              |                                |
| Migraine                             | 0.25%                          | 0.20%        | 0.30%         | 5.99E-49                                     | 0.31%                          |
| <u>Psychiatric disorders:</u>        |                                |              |               |                                              |                                |
| Major depression                     | 0.59%                          | 0.53%        | 0.64%         | 6.36E-218                                    | 1.01%                          |
| <u>Mean across the ten diseases:</u> |                                |              |               |                                              |                                |
| Mean                                 | 0.63%                          | -            | -             | -                                            | 1.19%                          |

*Notes:* This table reports the numbers that are shown in Figure 3. For each disease phenotype and each PGI (or PGI covariates). The covariates include sex, a third-degree polynomial in birth year and interactions with sex, the first 40 PCs, an PGI is from a two-tailed test of the null hypothesis that the coefficient is equal to zero, when the PGI is included in the regre:

**diseases in the UK Biobank**

| Disease PGI  |               |                                                   | EA PGI + disease PGI + their interaction |              |               |                                               |
|--------------|---------------|---------------------------------------------------|------------------------------------------|--------------|---------------|-----------------------------------------------|
| 95% CI - low | 95% CI - high | <i>P</i> value for coefficient on the disease PGI | Incremental Nagelkerke's $R^2$           | 95% CI - low | 95% CI - high | <i>P</i> value for coefficient on the EA PGI† |
| 1.98%        | 2.12%         | <1E-300                                           | 2.82%                                    | 2.73%        | 2.90%         | <1E-300                                       |
| 1.38%        | 1.54%         | <1E-300                                           | 2.08%                                    | 1.99%        | 2.17%         | 1.60E-281                                     |
| 1.71%        | 1.93%         | <1E-300                                           | 2.45%                                    | 2.32%        | 2.58%         | 3.08E-153                                     |
| 1.07%        | 1.23%         | <1E-300                                           | 1.77%                                    | 1.68%        | 1.86%         | 2.82E-248                                     |
| 1.52%        | 1.71%         | <1E-300                                           | 2.53%                                    | 2.41%        | 2.64%         | <1E-300                                       |
| 0.81%        | 0.94%         | <1E-300                                           | 1.25%                                    | 1.18%        | 1.33%         | 2.76E-156                                     |
| 0.24%        | 0.35%         | 5.37E-66                                          | 0.32%                                    | 0.27%        | 0.38%         | 3.74E-07                                      |
| 1.23%        | 1.51%         | 1.90E-184                                         | 1.85%                                    | 1.69%        | 2.02%         | 8.25E-63                                      |
| 0.25%        | 0.37%         | 8.57E-60                                          | 0.55%                                    | 0.48%        | 0.63%         | 4.38E-48                                      |
| 0.94%        | 1.08%         | <1E-300                                           | 1.41%                                    | 1.32%        | 1.50%         | 3.05E-147                                     |
| -            | -             | -                                                 | 1.70%                                    | -            | -             | -                                             |

combination), the table shows the incremental Nagelkerke's  $R^2$  from adding the PGI (or PGI combination) to a logistic regression model with batch dummies. The 95% confidence intervals were calculated with the bootstrap percentile method, with 1,000 repetitions. Each row represents a disease, and the numbers of cases and controls in the UK Biobank for each disease are shown in Table 1.

| $n$ | $P$ value for coefficient on the disease PGI | $P$ value for coefficient on the PGI interaction |
|-----|----------------------------------------------|--------------------------------------------------|
|     | <1E-300                                      | 9.40E-01                                         |
|     | <1E-300                                      | 4.31E-01                                         |
|     | <1E-300                                      | 6.66E-01                                         |
|     | <1E-300                                      | 7.22E-01                                         |
|     | <1E-300                                      | 8.21E-01                                         |
|     | <1E-300                                      | 6.31E-01                                         |
|     | 3.76E-65                                     | 8.00E-01                                         |
|     | 1.45E-160                                    | 2.01E-01                                         |
|     | 5.13E-59                                     | 1.67E-01                                         |
|     | <1E-300                                      | 6.70E-01                                         |

- -

of the disease phenotype on the  
 h  $P$  value for the coefficient on a  
 the last column of Supplementary

**Supplementary Table 7. Odds ratio for selected diseases by deciles of the EA PGI in the UK Biobank**

| Disease                                | EA PGI Decile | Odds Ratio | 95% CI - low | 95% CI - high |
|----------------------------------------|---------------|------------|--------------|---------------|
| <i>Cardiometaabolic diseases:</i>      |               |            |              |               |
| Essential<br>(primary)<br>hypertension | 1             | 1          | -            | -             |
|                                        | 2             | 0.896      | 0.869        | 0.925         |
|                                        | 3             | 0.835      | 0.810        | 0.861         |
|                                        | 4             | 0.778      | 0.755        | 0.803         |
|                                        | 5             | 0.736      | 0.713        | 0.759         |
|                                        | 6             | 0.691      | 0.669        | 0.713         |
|                                        | 7             | 0.648      | 0.627        | 0.669         |
|                                        | 8             | 0.612      | 0.593        | 0.632         |
|                                        | 9             | 0.564      | 0.546        | 0.583         |
|                                        | 10            | 0.484      | 0.468        | 0.501         |
| Ischaemic heart<br>disease             | 1             | 1          | -            | -             |
|                                        | 2             | 0.832      | 0.797        | 0.869         |
|                                        | 3             | 0.759      | 0.727        | 0.793         |
|                                        | 4             | 0.693      | 0.663        | 0.725         |
|                                        | 5             | 0.670      | 0.641        | 0.701         |
|                                        | 6             | 0.642      | 0.614        | 0.672         |
|                                        | 7             | 0.594      | 0.567        | 0.622         |
|                                        | 8             | 0.533      | 0.509        | 0.559         |
|                                        | 9             | 0.496      | 0.473        | 0.520         |
|                                        | 10            | 0.424      | 0.403        | 0.446         |
| Myocardial<br>infarction               | 1             | 1          | -            | -             |
|                                        | 2             | 0.812      | 0.762        | 0.865         |
|                                        | 3             | 0.713      | 0.668        | 0.761         |
|                                        | 4             | 0.671      | 0.628        | 0.716         |
|                                        | 5             | 0.612      | 0.572        | 0.655         |
|                                        | 6             | 0.599      | 0.560        | 0.641         |
|                                        | 7             | 0.533      | 0.497        | 0.571         |
|                                        | 8             | 0.499      | 0.465        | 0.536         |
|                                        | 9             | 0.443      | 0.412        | 0.477         |
|                                        | 10            | 0.368      | 0.340        | 0.398         |
| Pure<br>hypercholesterola<br>emia      | 1             | 1          | -            | -             |
|                                        | 2             | 0.865      | 0.828        | 0.904         |
|                                        | 3             | 0.818      | 0.782        | 0.855         |
|                                        | 4             | 0.754      | 0.721        | 0.788         |
|                                        | 5             | 0.737      | 0.705        | 0.771         |
|                                        | 6             | 0.703      | 0.671        | 0.736         |
|                                        | 7             | 0.665      | 0.635        | 0.697         |
|                                        | 8             | 0.587      | 0.560        | 0.616         |
|                                        | 9             | 0.564      | 0.537        | 0.592         |
|                                        | 10            | 0.493      | 0.468        | 0.518         |
|                                        | 1             | 1          | -            | -             |
|                                        | 2             | 0.836      | 0.796        | 0.879         |
|                                        | 3             | 0.753      | 0.715        | 0.792         |

|                                  |    |       |       |       |
|----------------------------------|----|-------|-------|-------|
| Type 2 diabetes                  | 4  | 0.694 | 0.659 | 0.730 |
|                                  | 5  | 0.629 | 0.596 | 0.663 |
|                                  | 6  | 0.599 | 0.568 | 0.632 |
|                                  | 7  | 0.531 | 0.502 | 0.561 |
|                                  | 8  | 0.487 | 0.461 | 0.516 |
|                                  | 9  | 0.448 | 0.422 | 0.474 |
|                                  | 10 | 0.379 | 0.357 | 0.403 |
| <hr/>                            |    |       |       |       |
| <u>Lung Diseases:</u>            |    |       |       |       |
| Asthma                           | 1  | 1     | -     | -     |
|                                  | 2  | 0.847 | 0.811 | 0.885 |
|                                  | 3  | 0.815 | 0.780 | 0.852 |
|                                  | 4  | 0.769 | 0.735 | 0.804 |
|                                  | 5  | 0.744 | 0.711 | 0.778 |
|                                  | 6  | 0.743 | 0.710 | 0.777 |
|                                  | 7  | 0.677 | 0.646 | 0.709 |
|                                  | 8  | 0.660 | 0.630 | 0.692 |
|                                  | 9  | 0.617 | 0.589 | 0.648 |
|                                  | 10 | 0.568 | 0.541 | 0.596 |
| <hr/>                            |    |       |       |       |
| <u>Musculoskeletal diseases:</u> |    |       |       |       |
| Osteoporosis                     | 1  | 1     | -     | -     |
|                                  | 2  | 0.952 | 0.878 | 1.032 |
|                                  | 3  | 0.924 | 0.852 | 1.002 |
|                                  | 4  | 0.909 | 0.838 | 0.987 |
|                                  | 5  | 0.839 | 0.773 | 0.911 |
|                                  | 6  | 0.872 | 0.803 | 0.946 |
|                                  | 7  | 0.853 | 0.786 | 0.926 |
|                                  | 8  | 0.819 | 0.754 | 0.889 |
|                                  | 9  | 0.848 | 0.781 | 0.921 |
|                                  | 10 | 0.833 | 0.767 | 0.905 |
| Rheumatoid arthritis             | 1  | 1     | -     | -     |
|                                  | 2  | 0.850 | 0.772 | 0.935 |
|                                  | 3  | 0.755 | 0.684 | 0.833 |
|                                  | 4  | 0.675 | 0.610 | 0.748 |
|                                  | 5  | 0.623 | 0.562 | 0.691 |
|                                  | 6  | 0.629 | 0.567 | 0.697 |
|                                  | 7  | 0.559 | 0.503 | 0.622 |
|                                  | 8  | 0.520 | 0.467 | 0.580 |
|                                  | 9  | 0.510 | 0.457 | 0.570 |
|                                  | 10 | 0.395 | 0.350 | 0.445 |
| <hr/>                            |    |       |       |       |
| <u>Neurological diseases:</u>    |    |       |       |       |
| Migraine                         | 1  | 1     | -     | -     |
|                                  | 2  | 0.885 | 0.814 | 0.961 |
|                                  | 3  | 0.889 | 0.819 | 0.965 |
|                                  | 4  | 0.861 | 0.793 | 0.936 |
|                                  | 5  | 0.792 | 0.728 | 0.863 |

|                               |    |       |       |       |
|-------------------------------|----|-------|-------|-------|
| migraine                      | 6  | 0.793 | 0.728 | 0.863 |
|                               | 7  | 0.746 | 0.684 | 0.813 |
|                               | 8  | 0.707 | 0.648 | 0.771 |
|                               | 9  | 0.663 | 0.607 | 0.725 |
|                               | 10 | 0.569 | 0.519 | 0.624 |
| <hr/>                         |    |       |       |       |
| <i>Psychiatric disorders:</i> |    |       |       |       |
| Major depression              | 1  | 1     | -     | -     |
|                               | 2  | 0.862 | 0.822 | 0.904 |
|                               | 3  | 0.806 | 0.768 | 0.846 |
|                               | 4  | 0.737 | 0.701 | 0.774 |
|                               | 5  | 0.716 | 0.681 | 0.752 |
|                               | 6  | 0.686 | 0.652 | 0.721 |
|                               | 7  | 0.636 | 0.604 | 0.669 |
|                               | 8  | 0.626 | 0.595 | 0.659 |
|                               | 9  | 0.554 | 0.525 | 0.584 |
|                               | 10 | 0.498 | 0.471 | 0.526 |

*Notes:* This table reports the numbers that are shown in Supplementary Figure 9. The EA PGI was converted into deciles (1= lowest, 10 = highest), and nine dummy variables were created to contrast each of deciles 2-10 to decile 1 as the reference. Odds ratio and 95% confidence intervals were estimated using logistic regression while controlling for covariates (sex, a third-degree polynomial in birth year and interactions with sex, the top 40 PCs, and batch dummies). The numbers of cases and controls in the UK Biobank for each disease are shown in the last column of Supplementary Table 23

**Supplementary Table 8. Odds ratio based on the EA and disease PGI for the diseases in the UK Biobank**

| <b>Panel A: Odds ratio for the highest risk decile (based on the EA PGI, the di</b> |                                                                            |              |               |           |
|-------------------------------------------------------------------------------------|----------------------------------------------------------------------------|--------------|---------------|-----------|
| Disease                                                                             | Odds ratio for the bottom EA PGI decile vs. the remaining deciles combined |              |               |           |
|                                                                                     | Odds ratio                                                                 | 95% CI - low | 95% CI - high | P value   |
| <u>Cardiometabolic diseases:</u>                                                    |                                                                            |              |               |           |
| Essential (primary) hypertension                                                    | 1.43                                                                       | 1.39         | 1.46          | 9.03E-197 |
| Ischaemic heart disease                                                             | 1.57                                                                       | 1.52         | 1.62          | 4.32E-164 |
| Myocardial infarction                                                               | 1.68                                                                       | 1.6          | 1.76          | 2.81E-103 |
| Pure hypercholesterolaemia                                                          | 1.43                                                                       | 1.39         | 1.48          | 4.23E-102 |
| Type 2 diabetes                                                                     | 1.65                                                                       | 1.59         | 1.71          | 3.92E-152 |
| <u>Lung diseases:</u>                                                               |                                                                            |              |               |           |
| Asthma                                                                              | 1.38                                                                       | 1.34         | 1.43          | 2.40E-84  |
| <u>Musculoskeletal diseases:</u>                                                    |                                                                            |              |               |           |
| Osteoporosis                                                                        | 1.14                                                                       | 1.08         | 1.22          | 1.79E-05  |
| Rheumatoid arthritis                                                                | 1.6                                                                        | 1.49         | 1.72          | 1.13E-37  |
| <u>Neurological diseases:</u>                                                       |                                                                            |              |               |           |
| Migraine                                                                            | 1.29                                                                       | 1.21         | 1.37          | 8.66E-16  |
| <u>Psychiatric disorders:</u>                                                       |                                                                            |              |               |           |
| Major depression                                                                    | 1.45                                                                       | 1.4          | 1.5           | 2.08E-93  |

| <b>Panel B: Odds ratio for the lowest risk PGI decile (based on the EA PGI, the</b> |                                                                         |              |               |           |
|-------------------------------------------------------------------------------------|-------------------------------------------------------------------------|--------------|---------------|-----------|
| Disease                                                                             | Odds ratio for the top EA PGI decile vs. the remaining deciles combined |              |               |           |
|                                                                                     | Odds ratio                                                              | 95% CI - low | 95% CI - high | P value   |
| <u>Cardiometabolic diseases:</u>                                                    |                                                                         |              |               |           |
| Ischaemic heart disease                                                             | 0.64                                                                    | 0.62         | 0.67          | 6.75E-98  |
| Myocardial infarction                                                               | 0.6                                                                     | 0.56         | 0.64          | 7.66E-55  |
| Pure hypercholesterolaemia                                                          | 0.69                                                                    | 0.66         | 0.71          | 2.13E-75  |
| Essential (primary) hypertension                                                    | 0.67                                                                    | 0.65         | 0.69          | 6.81E-194 |
| Type 2 diabetes                                                                     | 0.6                                                                     | 0.57         | 0.64          | 1.04E-82  |
| <u>Lung diseases:</u>                                                               |                                                                         |              |               |           |
| Asthma                                                                              | 0.76                                                                    | 0.73         | 0.79          | 2.64E-41  |
| <u>Musculoskeletal diseases:</u>                                                    |                                                                         |              |               |           |
| Osteoporosis                                                                        | 0.95                                                                    | 0.89         | 1.01          | 0.078     |
| Rheumatoid arthritis                                                                | 0.61                                                                    | 0.55         | 0.67          | 2.43E-22  |
| <u>Neurological diseases:</u>                                                       |                                                                         |              |               |           |
| Migraine                                                                            | 0.72                                                                    | 0.66         | 0.77          | 6.97E-19  |
| <u>Psychiatric disorders:</u>                                                       |                                                                         |              |               |           |
| Major depression                                                                    | 0.7                                                                     | 0.67         | 0.73          | 2.42E-54  |

Notes : Odds ratio were calculated with a logistic regression model adjusted for sex, a third-degree polynomial in birth year and int column of Supplementary Table 23.

\* Because the genetic correlation between femoral neck bone mineral density and osteoporosis is negative, we took the bottom decile

**sease PGI, or on risk as predicted by the combination of the EA PGI, the disease-specific PGI, and their interaction) vs.**

| Odds ratio for the top disease PGI decile vs. the remaining deciles combined |            |              |               |                | Odds ratio f |
|------------------------------------------------------------------------------|------------|--------------|---------------|----------------|--------------|
| Disease score                                                                | Odds ratio | 95% CI - low | 95% CI - high | <i>P</i> value | Odds ratio   |
| Systolic blood pressure                                                      | 1.78       | 1.74         | 1.83          | <1E-300        | 1.96         |
| Coronary artery disease                                                      | 1.82       | 1.77         | 1.88          | <1E-300        | 2.02         |
|                                                                              | 2.13       | 2.03         | 2.22          | 5.01E-252      | 2.35         |
| Low-density lipoprotein cholesterol                                          | 1.56       | 1.51         | 1.61          | 3.54E-164      | 1.79         |
| Type 2 diabetes                                                              | 1.84       | 1.78         | 1.91          | 2.13E-232      | 2.11         |
| Asthma                                                                       | 1.52       | 1.47         | 1.56          | 5.61E-151      | 1.64         |
| Femoral neck bone mineral density*                                           | 1.39       | 1.32         | 1.47          | 2.42E-33       | 1.39         |
| Rheumatoid arthritis                                                         | 2.09       | 1.96         | 2.23          | 6.52E-112      | 2.24         |
| Migraine                                                                     | 1.35       | 1.27         | 1.43          | 1.13E-23       | 1.5          |
| Major depression                                                             | 1.6        | 1.54         | 1.65          | 2.65E-160      | 1.74         |

**disease PGI, or on risk as predicted by the combination of the EA PGI, the disease-specific PGI, and their interaction) v**

| Odds ratio for the bottom disease PGI decile vs. the remaining deciles combined |            |              |               |                | Odds ratio f |
|---------------------------------------------------------------------------------|------------|--------------|---------------|----------------|--------------|
| Disease score                                                                   | Odds ratio | 95% CI - low | 95% CI - high | <i>P</i> value | Odds ratio   |
| Coronary artery disease                                                         | 0.58       | 0.55         | 0.6           | 4.89E-144      | 0.49         |
|                                                                                 | 0.48       | 0.44         | 0.51          | 5.16E-93       | 0.4          |
| Low-density lipoprotein cholesterol                                             | 0.59       | 0.57         | 0.62          | 1.64E-139      | 0.54         |
| Systolic blood pressure                                                         | 0.55       | 0.54         | 0.57          | <1E-300        | 0.51         |
| Type 2 diabetes                                                                 | 0.5        | 0.47         | 0.53          | 2.20E-139      | 0.43         |
| Asthma                                                                          | 0.64       | 0.61         | 0.67          | 1.67E-97       | 0.58         |
| Femoral neck bone mineral density*                                              | 0.74       | 0.69         | 0.79          | 2.81E-18       | 0.73         |
| Rheumatoid arthritis                                                            | 0.51       | 0.45         | 0.57          | 4.07E-34       | 0.45         |
| Migraine                                                                        | 0.7        | 0.65         | 0.76          | 5.25E-20       | 0.64         |
| Major depression                                                                | 0.6        | 0.57         | 0.63          | 7.52E-99       | 0.55         |

interactions with sex, the first 40 PCs and batch dummies in the UK Biobank. *P* values are based on two-sided *Z* tests. The num

vs. the 9 other deciles in Panel A, and vice-versa in Panel B.



---

**the remaining deciles combined**

---

for the top decile for risk as predicted based on the EA PGI, disease-specific PGI and their interaction vs. the remaining deciles

---

| 95% CI - low | 95% CI - high | <i>P</i> value |
|--------------|---------------|----------------|
| 1.92         | 2.01          | <1E-300        |
| 1.96         | 2.08          | <1E-300        |
| 2.25         | 2.45          | <1E-300        |
| 1.73         | 1.85          | 4.56E-290      |
| 2.04         | 2.19          | <1E-300        |
| 1.59         | 1.69          | 1.22E-217      |
| 1.32         | 1.47          | 8.25E-33       |
| 2.1          | 2.39          | 1.18E-134      |
| 1.41         | 1.59          | 8.53E-43       |
| 1.68         | 1.8           | 7.46E-232      |

---

**s. the remaining deciles combined**

---

for the bottom decile for risk as predicted based on the EA PGI, disease-specific PGI and their interaction vs. the remaining deciles

---

| 95% CI - low | 95% CI - high | <i>P</i> value |
|--------------|---------------|----------------|
| 0.47         | 0.51          | 3.95E-212      |
| 0.37         | 0.43          | 3.01E-123      |
| 0.52         | 0.57          | 9.00E-177      |
| 0.49         | 0.52          | <1E-300        |
| 0.41         | 0.46          | 9.14E-183      |
| 0.55         | 0.6           | 1.03E-135      |
| 0.68         | 0.78          | 2.06E-19       |
| 0.4          | 0.5           | 1.29E-42       |
| 0.59         | 0.69          | 3.42E-29       |
| 0.52         | 0.58          | 3.46E-126      |

---

numbers of cases and controls in the UK Biobank for each disease are shown in the last

**Supplementary Table 9. Description of data used to obtain the within-family meta-an**

| Phenotype                              | <i>N</i> - both<br>parents<br>genotyped | <i>N</i> - genotyped<br>sib(s) |
|----------------------------------------|-----------------------------------------|--------------------------------|
| <u><i>Anthropometric:</i></u>          |                                         |                                |
| BMI                                    | 867                                     | 34806                          |
| Height                                 | 871                                     | 34848                          |
| <u><i>Cardiometabolic:</i></u>         |                                         |                                |
| Blood Pressure (Diastolic)             | 834                                     | 32627                          |
| Blood Pressure (Systolic)              | 834                                     | 32627                          |
| Glucose                                | 757                                     | 30531                          |
| HDL Cholesterol                        | 758                                     | 30548                          |
| Non-HDL Cholesterol                    | 757                                     | 30494                          |
| <u><i>Cognitive and Education:</i></u> |                                         |                                |
| Cognitive Performance                  | 313                                     | 10364                          |

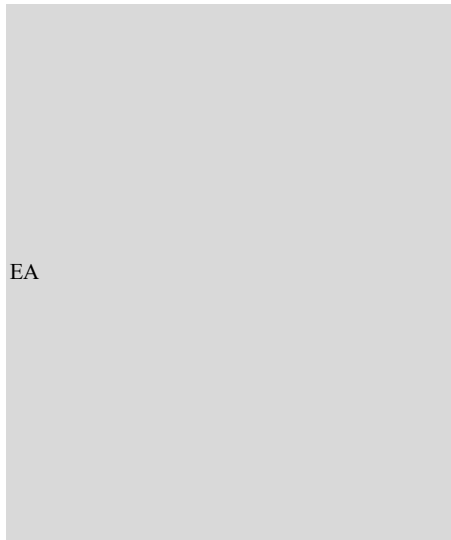

|    |     |       |
|----|-----|-------|
| EA | 873 | 34955 |
|----|-----|-------|

|            |    |  |
|------------|----|--|
| Vocabulary | NA |  |
|------------|----|--|

Fertility:

|                            |     |       |
|----------------------------|-----|-------|
| Age at First Birth (Women) | 298 | 13991 |
|----------------------------|-----|-------|

|                            |     |       |
|----------------------------|-----|-------|
| Number of Children (Women) | 516 | 20173 |
|----------------------------|-----|-------|

|                          |     |       |
|--------------------------|-----|-------|
| Number of Children (Men) | 356 | 14627 |
|--------------------------|-----|-------|

|                             |     |       |
|-----------------------------|-----|-------|
| Number of Children (Pooled) | 872 | 34800 |
|-----------------------------|-----|-------|

Income:

|                 |     |       |
|-----------------|-----|-------|
| Personal Income | 804 | 22699 |
|-----------------|-----|-------|

|                  |     |       |
|------------------|-----|-------|
| Household Income | 803 | 30369 |
|------------------|-----|-------|

Lung:

|      |     |       |
|------|-----|-------|
| FEV1 | 833 | 31899 |
|------|-----|-------|

Overall Health:

|                   |     |       |
|-------------------|-----|-------|
| Self Rated Health | 873 | 34843 |
|-------------------|-----|-------|

Psychiatric:

|                     |     |       |
|---------------------|-----|-------|
| Depressive Symptoms | 821 | 32796 |
|---------------------|-----|-------|

|             |     |       |
|-------------|-----|-------|
| Neuroticism | 735 | 28475 |
|-------------|-----|-------|

|                       |     |       |
|-----------------------|-----|-------|
| Subjective Well Being | 312 | 10543 |
|-----------------------|-----|-------|

Smoking and Drinking:

|                    |     |       |
|--------------------|-----|-------|
| Cigarettes per Day | 194 | 10638 |
|--------------------|-----|-------|

|                 |     |       |
|-----------------|-----|-------|
| Drinks Per Week | 294 | 11611 |
|-----------------|-----|-------|

|             |     |       |
|-------------|-----|-------|
| Ever Smoker | 868 | 34828 |
|-------------|-----|-------|

---

Notes: Information on the phenotypes used in the family-based analyses.

**References**

Okbay, A. et al. *Genetic variants associated with subjective well-being, depressive symp*

Smith, Blair H., et al. *Cohort Profile: Generation Scotland: Scottish Family Health Stud*  
Kweon, H. et al. *Genetic Fortune: Winning or Losing Education, Income, and Health*. 1

**Analysis decomposition estimates**

| <b>UKB</b>                                                                  | <b>GS</b>                            |                                |
|-----------------------------------------------------------------------------|--------------------------------------|--------------------------------|
|                                                                             | <i>N</i> - both parents<br>genotyped | <i>N</i> - genotyped<br>sib(s) |
| Coding                                                                      |                                      |                                |
| Data field: 21001                                                           | 2643                                 | 9630                           |
| Data field: 50                                                              | 2656                                 | 9662                           |
| Data field: 4079                                                            | 2664                                 | 9666                           |
| Data field: 4080                                                            | 2666                                 | 9669                           |
| Data field: 30740                                                           | 2513                                 | 9246                           |
| Data field: 30760                                                           | 2527                                 | 9362                           |
| Data fields: 30690, 30760.<br>Computed as Total Cholesterol-HDL cholesterol | 2527                                 | 9347                           |
| Data field: 20016<br>Fluid intelligence score                               | 2641                                 | 9489                           |

See Supplementary Table 14 Panel B 2552 9160

2643 9546

Data field: 2754 NA  
Data field: 2734 NA  
Data field: 2405 NA

Data fields: 2405, 2734 NA  
Union of male and female

Data field: 20227 NA  
See Kweon et al (2020)

Data field: 738  
"What is the average total income before tax received by your household?"  
Prefer not to answer = NA  
Do not know = NA  
Less than 18,000 NA  
18,000 to 30,999  
31,000 to 51,999  
52,000 to 100,000  
Greater than 100,000  
Coded as average of log of endpoints of given range for each answer.

Data field: 3063 2310 8209



Data field: 2178

"In general how would you rate your overall health?"

- Prefer not to answer = NA
- Do not know = NA
- Poor = 1
- Fair = 2
- Good = 3
- Excellent = 4

NA

Data fields: 2050, 2060

See Okbay et al (2016)

NA

Data field: 20127

2665

9665

Data field: 4526

"In general how happy are you?"

Coded following Okbay et al. 2016:

- Prefer not to answer = NA
- Do not know = NA
- Extremely unhappy = 1
- Very unhappy = 2
- Moderately unhappy = 3
- Moderately happy = 4
- Very happy = 5
- Extremely happy = 6

NA

Data fields: 3456, 2887

919

4269

Data field: 20414

"How often do you have a drink containing alcohol?"

- Prefer not to answer = NA
- Never or Monthly or less = 0
- 2 to 4 times a month = 0.75
- 2 to 3 times a week = 2.5
- 4 or more times a week = 4

NA

Data field: 20116

Binary coding

NA

---

*toms, and neuroticism identified through genome-wide analyses.* Nat Genet **48**, 624–633 (2016)

y (GS: SFHS). *The study, its participants and their potential for genetic research on health and i*  
inbergen Institute Discussion Paper **20-053/V** (2020).

| Coding                                                                                                                                                                                   | <i>N</i> - genotyped sib(s) |
|------------------------------------------------------------------------------------------------------------------------------------------------------------------------------------------|-----------------------------|
| Clinical measurement. See Smith et al. 2013                                                                                                                                              | 8911                        |
| Clinical measurement. See Smith et al. 2013                                                                                                                                              | 8995                        |
| Clinical measurement. See Smith et al. 2013                                                                                                                                              |                             |
| Clinical measurement. See Smith et al. 2013                                                                                                                                              |                             |
| Clinical measurement. See Smith et al. 2013<br>Clinical measurement. See Smith et al. 2013<br>Clinical measurement. See Smith et al. 2013. Computed as Total Cholesterol-HDL Cholesterol |                             |
| first PC of Logical memory (total of immediate and delayed), Digit Symbol, and Verbal fluency. Each subtest was variance normalised before performing principal component analysis.      | 3786                        |

How many years altogether did you attend school or study full-time?"

First converted to ISCED categories, and then from ISCED to US years of education as follows

- 0 -> ISCED 0 -> 1
- 0-4 -> ISCED 0 -> 1
- 5-9 -> ISCED 1 -> 7
- 10-11 -> ISCED 2 -> 10
- 12-13 -> ISCED 3 -> 13
- 14-15 -> ISCED 4 -> 15
- 16-17 -> ISCED 4 -> 15
- 17-18 -> ISCED 5 -> 19
- 18-19 -> ISCED 5 -> 19
- 22-23 -> ISCED 6 -> 22
- 24+ -> ISCED 6 -> 22

Mill Hill Vocabulary Scale

^

^

^

^

8848

^

^

7991

Clinical measurement. See Smith et al. 2013

7014

7506

Eysenck N subtest from Eysenck  
Personality Questionnaire. See  
Smith et al. 2013

3854

From smoking history section of  
health and lifestyle questionnaire.  
See Smith et al. 2013

4394

⌞

10073

⌞

10303

---

). <https://doi.org/10.1038/ng.3552>





---

---

**STR**

---

Coding

Anthropometric data is from the following surveys in the Swedish Twin Register:

- STR TwinGene (WEIGHT\_KG, HEIGHT\_CM)
- STR YATSS (EAD\_WEIGHT\_PRESENT\_O, EAD\_LENGTH\_PRESENT\_O)
- STR STAGE (WEIGHTPV, LENGTHPV)

The TwinGene measurements were conducted by a physician, whereas YATSS and STAGE anthropometrics were self-reported. Extreme outliers were dropped (defined as less than 100cm height) since these were likely erroneously entered.

Anthropometric data from conscription records were excluded since these do not satisfy the 21 years of age restriction.

See above

NA

NA

NA

NA

NA

Cognitive capacity data is constructed using results from the Swedish Enlistment Battery in the conscription records (Swedish National Service Administration). Only data for men have been retained. Testing methodology for the enlistment battery has changed somewhat over time, but a simple summary of the scores in the component parts of the test is thought to be an adequate operationalisation of general intelligence (see Carlstedt, B. 2000. Cognitive abilities. PhD thesis, University of Gothenburg.) To avoid artefacts of changes in testing methodology, and secular trends (i.e. Flynn effect), final test scores were standardised by birth cohort.

Years of education is constructed based on educational level and type, coded according to a modified version of the ISCED97 classification system called SUN2000 (Sun2000Niva). These data were retrieved from the LISA database (Statistics Sweden, LISA, Integrated database for labour market research 1990–2018).

- <200 = 7
- 200-299 = 9
- 310-319 = 10
- 320-329 = 11
- 330-339 = 12
- 410-419 = 13
- 520-529 = 14
- 530-539 = 15
- 540-549 = 16
- 550-559 = 17
- 600-629 = 18
- 640-649 = 20

NA

NA

NA

NA

Number of children is calculated based on the Statistics Sweden multi-generation register (Statistics Sweden, Population and Welfare Statistics, Multi-generation register 2018), by counting the number of children connected to a given individual in the latest version of the register (i.e. in 2018). Note that both biological children and adoptive children are counted.

NA

Household income is based on the item "aggregated household income" (SamRakInkHh) from two separate waves of the census (Statistics Sweden, Population and housing census 1985;1990).

This variable contains aggregated household income from six sources: gainful employment, capital income, real estate income, temporary employment, land income and business income, counted in 100's SEK. The entries for each year have been CPI-adjusted (2015 SEK value), logged ( $x+1000$ ) and demeaned by year of birth. The final variable is the average of the two years (unless only one year existed).

NA

Self-rated health is based on items from the following four surveys in the Swedish Twin Register:

- STR SALT (SJALVUPPSKATTAD6)
- STR STAGE (HEALTH)
- STR STAGE ONE (HEALTH)
- STR YATSS (MHI\_GENERAL\_HEALTH\_STAT)

In the SALT survey, the item is scaled as 0-100, in steps of five, whereas the remaining items are scaled 1-5. All items have therefore been rescaled to have the same width, with higher values indicating better self-rated health.

from the STR SALT survey (FELT\_DEPR): "Have you ever felt sad, downhearted or depressed for two weeks or longer?" with the options "Yes," "No" and "Yes, I took antidepressive medication." Recoded into a binary response, with both Yes-options as 1 and No as 0.

NA

From SALT survey (ATTITYD1):  
"Would you generally describe yourself as:"  
1=Not happy at all to 4=Very happy

Tobacco use data is aggregated from the larger tobacco batteries in the following surveys in the Swedish Twin Register: STR Survey, 1973, STR SALT, STR STAGE, STR STAGE ONE, STR YATSS

In the 1973 Survey, the derived variable Smoking Status (NYRA423) is used to construct ever smoker. The three original categories ("Non-smoker", "Current smoker" and "Previous smoker") have been condensed to a binary, with "Non-smoker" indicating never smoker (0) and "Current/Previous smoker" indicating ever smoker (1). Number of cigarettes per day is based on a multiple choice question with five categories: 1-5 per day, 6-10 per day, 11-15 per day, 16-20 per day and 21 or more per day. Category midpoints were used (3, 8, 13 and 18), and 25 imputed for the 21 or more category.

In the SALT Survey, the tobacco items asks about both cigarette smoking and snuff use. Only answers that regard cigarette smoking have been retained. A respondent has been coded as a never smoker (0) if they have answered either of the options "Not even tried" or "Only tried", and coded as ever smoker (1) if they have answered either of the following options: "I smoke now and then", "I smoke regularly", "I smoke at parties", "I used to smoke now and then", "I used to smoke regularly" or "I used to smoke at parties." Number of cigarettes per day is a free-text answer to the question "How much do you/did you use to smoke per day? Answer as precisely as possible".

The tobacco battery in the STAGE Survey similarly asks about both cigarette smoking and snuff use. Only questions that regard cigarette smoking have been retained. Respondents were coded as never smokers (0) if they answered in the affirmative to either of the statements "Never tried" or "Only tried" and as ever smoker (1) if they answered in the affirmative to either of the statements "Smoke/used to smoke now and then or at parties" or "Smoke/used to smoke regularly". No data on cigarettes per day is available in STAGE.

The tobacco battery in the STAGE ONE survey does not contain any directly comparable question on current or past smoking habits, but instead an item on total cigarette use: "Have you smoked more than 100 cigarettes in your whole life?" (CIGS\_1). This was used to construct the ever smoker variable, where a negative answer is counted as never smoker (0), and an affirmative answer as ever smoker (1). Cigarettes per day is based on a three-part item where the respondent is asked to indicate in free-text how many cigarettes per day, week or month s/he currently smokes (CIGS3DAY\_DAY, CIGS3WEK\_WEEK, CIGS3MON\_YEAR). Answers for month or week were simply divided by 30 or 7, respectively.

The YATSS Survey, contains the same question: "Have you smoked more than 100 cigarettes in your whole life?" (SMO\_1.IFF) and is coded the same way. Cigarettes per day is constructed from the free-text item "How

Alcohol use is aggregated from the larger alcohol use batteries in the following surveys in the Swedish Twin Register: STR SALT, STR STAGE, STR STAGE ONE, STR YATSS

The alcohol battery in the SALT, STAGE and STAGE ONE Surveys contain separate items for weekday and weekend consumption, and for wine, beer and spirits, respectively. Each category consists of a multiple-choice question where the respondent is asked to indicate how many bottles/glasses/cans they typically consume. To obtain the standardised drinks per week, these have been converted to total fluid amounts and multiplied by the typical volume alcohol content per type.

The YATSS Survey instead asks about typical monthly consumption of a wider range of beverages: folk beer, regular beer, strong beer, cider, alcoholic soda, wine and spirits. A similar procedure was followed to convert this to total alcohol amounts, and then converted from monthly to weekly consumption.

Final drinking data was standardised on a per-cohort basis to avoid artefacts of the different measurement approaches.

See "Cigarettes per day"

---

589-700.

**Supplementary Table 10. EA PGI Decomposition**

| Phenotype                              | Population | Population SE | Direct  | Direct SE | Population Minus Direct |
|----------------------------------------|------------|---------------|---------|-----------|-------------------------|
| <i><u>Anthropometric:</u></i>          |            |               |         |           |                         |
| BMI                                    | -0.1338    | 0.0048        | -0.0854 | 0.0077    | -0.0484                 |
| Height                                 | 0.1019     | 0.0047        | 0.035   | 0.0068    | 0.0669                  |
| <i><u>Cardiometabolic:</u></i>         |            |               |         |           |                         |
| Blood Pressure (Diastolic)             | -0.0593    | 0.0051        | -0.031  | 0.0091    | -0.0284                 |
| Blood Pressure (Systolic)              | -0.0657    | 0.0051        | -0.0446 | 0.0091    | -0.0211                 |
| Glucose                                | -0.0139    | 0.005         | -0.0119 | 0.0098    | -0.002                  |
| HDL Cholesterol                        | 0.0821     | 0.0055        | 0.0495  | 0.0089    | 0.0327                  |
| Non-HDL Cholesterol                    | -0.0255    | 0.0054        | -0.0181 | 0.0093    | -0.0074                 |
| <i><u>Cognitive and Education:</u></i> |            |               |         |           |                         |
| Cognitive Performance                  | 0.2449     | 0.0066        | 0.1595  | 0.0109    | 0.0854                  |
| EA                                     | 0.33       | 0.0044        | 0.1833  | 0.0073    | 0.1467                  |
| Vocabulary                             | 0.2608     | 0.0103        | 0.1553  | 0.0148    | 0.1055                  |
| <i><u>Fertility:</u></i>               |            |               |         |           |                         |
| Age at First Birth (Women)             | 0.2695     | 0.0084        | 0.1773  | 0.0163    | 0.0922                  |
| Number of Children (Women)             | -0.0554    | 0.0072        | -0.0645 | 0.0142    | 0.0091                  |
| Number of Children (Men)               | -0.03      | 0.0083        | -0.0469 | 0.0171    | 0.0169                  |
| Number of Children (Pooled)            | -0.04      | 0.005         | -0.053  | 0.0097    | 0.013                   |
| <i><u>Income:</u></i>                  |            |               |         |           |                         |
| Personal Income                        | 0.2435     | 0.0066        | 0.1448  | 0.0126    | 0.0987                  |
| Household Income                       | 0.1858     | 0.0053        | 0.1104  | 0.0099    | 0.0754                  |
| <i><u>Lung:</u></i>                    |            |               |         |           |                         |
| FEV1                                   | 0.0742     | 0.0054        | 0.0136  | 0.0091    | 0.0606                  |
| <i><u>Overall Health:</u></i>          |            |               |         |           |                         |
| Self Rated Health                      | 0.1306     | 0.0051        | 0.0708  | 0.0097    | 0.0598                  |
| <i><u>Psychiatric:</u></i>             |            |               |         |           |                         |
| Depressive Symptoms                    | -0.0576    | 0.0051        | -0.0456 | 0.0102    | -0.012                  |
| Neuroticism                            | -0.0645    | 0.0053        | -0.043  | 0.0096    | -0.0215                 |
| Subjective Well Being                  | -0.0085    | 0.0085        | 0.0033  | 0.017     | -0.0118                 |
| <i><u>Smoking and Drinking:</u></i>    |            |               |         |           |                         |
| Cigarettes per Day                     | -0.0882    | 0.0074        | -0.0469 | 0.0141    | -0.0412                 |
| Drinks Per Week                        | 0.0552     | 0.007         | 0.0355  | 0.014     | 0.0197                  |
| Ever Smoker                            | -0.1046    | 0.005         | -0.0937 | 0.0091    | -0.0109                 |

*Notes:* This table gives meta-analysis estimates (from UK Biobank, Generation Scotland, and the Swedish Twin Registry) for the difference in EA as  $-\log_{10}(P)$  from a two-sided Z-test for non-zero difference between population and direct, and between maternal and paternal effects.

| Population<br>Minus Direct SE | Maternal Minus<br>Paternal | Maternal Minus<br>Paternal SE | Population<br>Minus Direct <i>P</i><br>value | Maternal<br>Minus Paternal<br><i>P</i> value | Direct-<br>Population Ratio |
|-------------------------------|----------------------------|-------------------------------|----------------------------------------------|----------------------------------------------|-----------------------------|
| 0.0073                        | -0.0167                    | 0.029                         | 10.5997                                      | 0.2474                                       | 0.6336                      |
| 0.0067                        | -0.0328                    | 0.0282                        | 22.5249                                      | 0.6126                                       | 0.3321                      |
| 0.0083                        | -0.0211                    | 0.0283                        | 3.1863                                       | 0.3411                                       | 0.5234                      |
| 0.0083                        | -0.0155                    | 0.0284                        | 1.9561                                       | 0.232                                        | 0.6801                      |
| 0.0087                        | -0.0001                    | 0.0283                        | 0.0875                                       | 0.0018                                       | 0.8552                      |
| 0.0083                        | 0.057                      | 0.0298                        | 4.1126                                       | 1.2523                                       | 0.6037                      |
| 0.0085                        | -0.0471                    | 0.0295                        | 0.4155                                       | 0.9547                                       | 0.7104                      |
| 0.0102                        | 0.0433                     | 0.0312                        | 16.3465                                      | 0.7804                                       | 0.6562                      |
| 0.0069                        | 0.0093                     | 0.0279                        | 98.5052                                      | 0.1311                                       | 0.5564                      |
| 0.0141                        | -0.0207                    | 0.0332                        | 13.0846                                      | 0.2738                                       | 0.5968                      |
| 0.0149                        | 0.0972                     | 0.0887                        | 9.2352                                       | 0.5634                                       | 0.6591                      |
| 0.0129                        | 0.0337                     | 0.0709                        | 0.3165                                       | 0.1974                                       | 1.1631                      |
| 0.0154                        | -0.0033                    | 0.0862                        | 0.5675                                       | 0.0135                                       | 1.5599                      |
| 0.0089                        | 0.0187                     | 0.0548                        | 0.8467                                       | 0.1348                                       | 1.3148                      |
| 0.0116                        | -0.0426                    | 0.0556                        | 16.8267                                      | 0.3539                                       | 0.5961                      |
| 0.0091                        | 0.0632                     | 0.0559                        | 15.8402                                      | 0.5879                                       | 0.5843                      |
| 0.0084                        | -0.0152                    | 0.0299                        | 12.3077                                      | 0.214                                        | 0.1839                      |
| 0.0089                        | 0.0483                     | 0.0543                        | 10.7095                                      | 0.4275                                       | 0.5387                      |
| 0.0092                        | -0.0177                    | 0.0566                        | 0.7113                                       | 0.1225                                       | 0.786                       |
| 0.0088                        | 0.0037                     | 0.0286                        | 1.8468                                       | 0.0474                                       | 0.6682                      |
| 0.0155                        | -0.0779                    | 0.0956                        | 0.3512                                       | 0.3821                                       | -0.3592                     |
| 0.0127                        | 0.0063                     | 0.0483                        | 2.9174                                       | 0.0477                                       | 0.5233                      |
| 0.0127                        | 0.071                      | 0.1046                        | 0.9206                                       | 0.303                                        | 0.6903                      |
| 0.0085                        | -0.0246                    | 0.0549                        | 0.7059                                       | 0.1844                                       | 0.9019                      |

irect, population, difference between population and direct, and difference between maternal and paternal effects. *F* ts.

---

---

Direct-  
Population SE

---

0.0523

0.063

0.1403

0.1248

0.6262

0.098

0.329

0.0406

0.0204

0.0516

0.055

0.2349

0.5371

0.224

0.0474

0.0487

0.1181

0.068

0.1603

0.1347

1.8866

0.148

0.228

0.0794

---

' values are given



**Supplementary Table 11. Height PGI Decomposition**

| Phenotype                              | Population | Population S.E. | Direct  | Direct S.E. | Population Minus Direct |
|----------------------------------------|------------|-----------------|---------|-------------|-------------------------|
| <i><u>Anthropometric:</u></i>          |            |                 |         |             |                         |
| BMI                                    | -0.0571    | 0.0052          | -0.044  | 0.0079      | -0.0131                 |
| Height                                 | 0.5835     | 0.0043          | 0.531   | 0.0056      | 0.0525                  |
| <i><u>Cardiometabolic:</u></i>         |            |                 |         |             |                         |
| Blood Pressure (Diastolic)             | -0.0256    | 0.0051          | -0.015  | 0.0086      | -0.0106                 |
| Blood Pressure (Systolic)              | -0.0361    | 0.0051          | -0.0221 | 0.0086      | -0.0141                 |
| Glucose                                | 0.0051     | 0.005           | 0.0018  | 0.0093      | 0.0033                  |
| HDL Cholesterol                        | 0.006      | 0.0055          | -0.0149 | 0.0084      | 0.0209                  |
| Non-HDL Cholesterol                    | -0.0346    | 0.0053          | -0.0287 | 0.0088      | -0.006                  |
| <i><u>Cognitive and Education:</u></i> |            |                 |         |             |                         |
| Cognitive Performance                  | 0.0468     | 0.0074          | 0.022   | 0.0113      | 0.0248                  |
| EA                                     | 0.0627     | 0.0051          | 0.0147  | 0.0079      | 0.048                   |
| Vocabulary                             | 0.0522     | 0.0106          | 0.0303  | 0.0142      | 0.0219                  |
| <i><u>Fertility:</u></i>               |            |                 |         |             |                         |
| Age at First Birth (Women)             | 0.0756     | 0.0088          | 0.0474  | 0.0159      | 0.0282                  |
| Number of Children (Women)             | -0.0223    | 0.0072          | -0.0008 | 0.0136      | -0.0216                 |
| Number of Children (Men)               | 0.0019     | 0.0083          | 0.0011  | 0.0162      | 0.0009                  |
| Number of Children (Pooled)            | -0.0118    | 0.0056          | -0.0002 | 0.0102      | -0.0116                 |
| <i><u>Income:</u></i>                  |            |                 |         |             |                         |
| Personal Income                        | 0.0494     | 0.0069          | 0.0196  | 0.0121      | 0.0297                  |
| Household Income                       | 0.0536     | 0.0061          | 0.0281  | 0.0105      | 0.0255                  |
| <i><u>Lung:</u></i>                    |            |                 |         |             |                         |
| FEV1                                   | 0.2142     | 0.0052          | 0.1738  | 0.0085      | 0.0404                  |
| <i><u>Overall Health:</u></i>          |            |                 |         |             |                         |
| Self Rated Health                      | 0.0262     | 0.0057          | 0.001   | 0.0101      | 0.0252                  |
| <i><u>Psychiatric:</u></i>             |            |                 |         |             |                         |
| Depressive Symptoms                    | -0.0194    | 0.0057          | 0.0127  | 0.0106      | -0.0321                 |
| Neuroticism                            | -0.0158    | 0.0053          | -0.0035 | 0.0091      | -0.0123                 |
| Subjective Well Being                  | -0.0096    | 0.01            | -0.0228 | 0.0188      | 0.0132                  |
| <i><u>Smoking and Drinking:</u></i>    |            |                 |         |             |                         |
| Cigarettes per Day                     | -0.0242    | 0.0082          | -0.0005 | 0.0149      | -0.0237                 |
| Drinks per Week                        | 0.0137     | 0.0095          | -0.0012 | 0.0179      | 0.0149                  |
| Ever Smoker                            | -0.0119    | 0.0057          | 0.0109  | 0.0099      | -0.0228                 |

*Notes* : This table gives meta-analysis estimates (from UK Biobank and Generation Scotland) for the direct, population, and direct minus population effects. The direct effect is the difference between population and direct, and between maternal and paternal effects.

| Population<br>Minus Direct<br>S.E. | Maternal<br>Minus Paternal | Maternal<br>Minus Paternal<br>S.E. | Direct Minus<br>Population<br>Ratio | Direct Minus<br>Population<br>Ratio S.E. | Population<br>Minus Direct<br><i>P</i> value | Maternal Minus<br>Paternal <i>P</i> value |
|------------------------------------|----------------------------|------------------------------------|-------------------------------------|------------------------------------------|----------------------------------------------|-------------------------------------------|
| 0.0073                             | -0.042                     | 0.0277                             | 0.7708                              | 0.1249                                   | 1.1332                                       | 0.8877                                    |
| 0.0057                             | 0.0385                     | 0.023                              | 0.9101                              | 0.0095                                   | 19.6669                                      | 1.0232                                    |
| 0.0077                             | -0.0005                    | 0.0271                             | 0.5859                              | 0.301                                    | 0.7712                                       | 0.0067                                    |
| 0.0077                             | -0.0029                    | 0.0271                             | 0.6106                              | 0.2125                                   | 1.1667                                       | 0.0383                                    |
| 0.0081                             | 0.0137                     | 0.0273                             | 0.3463                              | 1.6865                                   | 0.1659                                       | 0.2114                                    |
| 0.0077                             | 0.0049                     | 0.0288                             | -2.4936                             | 3.1733                                   | 2.1777                                       | 0.0625                                    |
| 0.0079                             | -0.0261                    | 0.0285                             | 0.8278                              | 0.2262                                   | 0.3456                                       | 0.4429                                    |
| 0.0104                             | 0.0541                     | 0.0307                             | 0.4708                              | 0.2181                                   | 1.7667                                       | 1.1084                                    |
| 0.0073                             | 0.0155                     | 0.0278                             | 0.2341                              | 0.1186                                   | 10.2227                                      | 0.2378                                    |
| 0.0134                             | -0.0029                    | 0.0335                             | 0.5801                              | 0.2428                                   | 0.9942                                       | 0.0311                                    |
| 0.0143                             | -0.0202                    | 0.0803                             | 0.6264                              | 0.1887                                   | 1.3224                                       | 0.0964                                    |
| 0.0121                             | 0.003                      | 0.0635                             | 0.0349                              | 0.603                                    | 1.122                                        | 0.0169                                    |
| 0.0144                             | 0.0293                     | 0.0805                             | 0.5489                              | 7.654                                    | 0.0213                                       | 0.1455                                    |
| 0.0092                             | 0.014                      | 0.0498                             | 0.0154                              | 0.8645                                   | 0.685                                        | 0.1082                                    |
| 0.011                              | -0.0633                    | 0.0515                             | 0.3978                              | 0.2263                                   | 2.1581                                       | 0.6603                                    |
| 0.0096                             | 0.0209                     | 0.0521                             | 0.5235                              | 0.1789                                   | 2.1044                                       | 0.1622                                    |
| 0.0077                             | 0.0037                     | 0.0278                             | 0.8114                              | 0.0355                                   | 6.8053                                       | 0.0486                                    |
| 0.0091                             | 0.0079                     | 0.0498                             | 0.0393                              | 0.3825                                   | 2.2399                                       | 0.0585                                    |
| 0.0095                             | -0.0627                    | 0.051                              | -0.6559                             | 0.6555                                   | 3.145                                        | 0.6593                                    |
| 0.0081                             | -0.0024                    | 0.0273                             | 0.2202                              | 0.5472                                   | 0.8885                                       | 0.032                                     |
| 0.0169                             | -0.0602                    | 0.0818                             | 2.3747                              | 2.3715                                   | 0.3619                                       | 0.3357                                    |
| 0.0132                             | -0.0181                    | 0.0478                             | 0.0191                              | 0.6141                                   | 1.1413                                       | 0.152                                     |
| 0.0159                             | -0.0122                    | 0.088                              | -0.0842                             | 1.3324                                   | 0.4546                                       | 0.0506                                    |
| 0.009                              | -0.0499                    | 0.05                               | -0.9237                             | 1.1043                                   | 1.9398                                       | 0.4966                                    |

lifference between population and direct, and difference between maternal and paternal effects. *P* values are given as  $-\log_{10}(P)$

| Direct-<br>Population<br>Ratio | Direct-<br>Population S.E. |
|--------------------------------|----------------------------|
| 0.7707                         | 0.1248                     |
| 0.9101                         | 0.0094                     |
| 0.5858                         | 0.3009                     |
| 0.6105                         | 0.2125                     |
| 0.3462                         | 1.6864                     |
| -2.4936                        | 3.1732                     |
| 0.8277                         | 0.2261                     |
| 0.4707                         | 0.2181                     |
| 0.234                          | 0.1185                     |
| 0.58                           | 0.2428                     |
| 0.6264                         | 0.1887                     |
| 0.0349                         | 0.603                      |
| 0.5488                         | 7.654                      |
| 0.0153                         | 0.8644                     |
| 0.3978                         | 0.2262                     |
| 0.5235                         | 0.1788                     |
| 0.8113                         | 0.0354                     |
| 0.0392                         | 0.3825                     |
| -0.6559                        | 0.6554                     |
| 0.2202                         | 0.5471                     |
| 2.3747                         | 2.3715                     |
| 0.019                          | 0.6141                     |
| -0.0841                        | 1.3324                     |
| -0.9237                        | 1.1042                     |

† from a two-sided  $Z$ -test for non-

**Supplementary Table 12. BMI PGI Decomposition**

| Phenotype                              | Population | Population S.E. | Direct  | Direct S.E. | Population Minus Direct |
|----------------------------------------|------------|-----------------|---------|-------------|-------------------------|
| <i><u>Anthropometric:</u></i>          |            |                 |         |             |                         |
| BMI                                    | 0.3898     | 0.005           | 0.3751  | 0.0075      | 0.0147                  |
| Height                                 | -0.086     | 0.005           | -0.0391 | 0.0068      | -0.0468                 |
| <i><u>Cardiometabolic:</u></i>         |            |                 |         |             |                         |
| Blood Pressure (Diastolic)             | 0.0909     | 0.0051          | 0.0708  | 0.0084      | 0.0201                  |
| Blood Pressure (Systolic)              | 0.0569     | 0.0051          | 0.0294  | 0.0083      | 0.0275                  |
| Glucose                                | 0.0293     | 0.005           | 0.0307  | 0.0089      | -0.0014                 |
| HDL Cholesterol                        | -0.131     | 0.0054          | -0.1201 | 0.0081      | -0.0109                 |
| Non-HDL Cholesterol                    | 0.0193     | 0.0053          | 0.015   | 0.0085      | 0.0043                  |
| <i><u>Cognitive and Education:</u></i> |            |                 |         |             |                         |
| Cognitive Performance                  | -0.0692    | 0.0071          | -0.0182 | 0.0109      | -0.051                  |
| EA                                     | -0.11      | 0.0051          | -0.0266 | 0.0076      | -0.0834                 |
| Vocabulary                             | -0.0902    | 0.0105          | -0.0104 | 0.0137      | -0.0797                 |
| <i><u>Fertility:</u></i>               |            |                 |         |             |                         |
| Age at First Birth (Women)             | -0.1025    | 0.0084          | -0.0319 | 0.015       | -0.0707                 |
| Number of Children (Women)             | 0.0125     | 0.0072          | -0.0048 | 0.0131      | 0.0173                  |
| Number of Children (Men)               | 0.0333     | 0.0082          | 0.0278  | 0.0155      | 0.0056                  |
| Number of Children (Pooled)            | 0.0214     | 0.0055          | 0.0095  | 0.0099      | 0.0119                  |
| <i><u>Income:</u></i>                  |            |                 |         |             |                         |
| Personal Income                        | -0.0822    | 0.0066          | -0.0255 | 0.0116      | -0.0567                 |
| Household Income                       | -0.0782    | 0.0059          | -0.0228 | 0.0101      | -0.0555                 |
| <i><u>Lung:</u></i>                    |            |                 |         |             |                         |
| FEV1                                   | -0.0581    | 0.0053          | -0.0281 | 0.0084      | -0.03                   |
| <i><u>Overall Health:</u></i>          |            |                 |         |             |                         |
| Self Rated Health                      | -0.1319    | 0.0056          | -0.1048 | 0.0097      | -0.0271                 |
| <i><u>Psychiatric:</u></i>             |            |                 |         |             |                         |
| Depressive Symptoms                    | 0.0441     | 0.0057          | 0.0367  | 0.0102      | 0.0073                  |
| Subjective Well Being                  | 0.0147     | 0.0099          | 0.0103  | 0.0183      | 0.0044                  |
| <i><u>Smoking and Drinking:</u></i>    |            |                 |         |             |                         |
| Cigarettes per Day                     | 0.0936     | 0.0082          | 0.0639  | 0.0144      | 0.0296                  |
| Drinks per Week                        | -0.0643    | 0.0093          | -0.0292 | 0.0176      | -0.0351                 |
| Ever Smoker                            | 0.0449     | 0.0057          | 0.0466  | 0.0095      | -0.0016                 |

*Notes:* This table gives meta-analysis estimates (from UK Biobank and Generation Scotland) for the direct, population, diff from a two-sided Z-test for non-zero difference between population and direct, and between maternal and paternal effects.

| Population<br>Minus Direct<br>S.E. | Maternal<br>Minus Paternal | Maternal<br>Minus Paternal<br>S.E. | Population<br>Minus Direct<br><i>P</i> value | Maternal Minus<br>Paternal <i>P</i> value | Direct-<br>Population<br>Ratio | Direct-<br>Population S.E. |
|------------------------------------|----------------------------|------------------------------------|----------------------------------------------|-------------------------------------------|--------------------------------|----------------------------|
| 0.0068                             | 0.007                      | 0.0248                             | 1.5052                                       | 0.1097                                    | 0.9622                         | 0.0174                     |
| 0.0065                             | -0.0052                    | 0.0258                             | 12.206                                       | 0.0754                                    | 0.4551                         | 0.0718                     |
| 0.0074                             | 0.0018                     | 0.0258                             | 2.1977                                       | 0.0251                                    | 0.7787                         | 0.0803                     |
| 0.0074                             | -0.0166                    | 0.0259                             | 3.7373                                       | 0.2822                                    | 0.5164                         | 0.1302                     |
| 0.0077                             | -0.0397                    | 0.0257                             | 0.0676                                       | 0.9122                                    | 1.0479                         | 0.2646                     |
| 0.0073                             | -0.0214                    | 0.027                              | 0.8622                                       | 0.3695                                    | 0.9168                         | 0.0553                     |
| 0.0076                             | -0.0227                    | 0.0269                             | 0.2417                                       | 0.3985                                    | 0.7793                         | 0.3872                     |
| 0.0098                             | 0.0351                     | 0.0288                             | 6.7215                                       | 0.6505                                    | 0.2624                         | 0.1462                     |
| 0.007                              | -0.0138                    | 0.0265                             | 31.7462                                      | 0.2205                                    | 0.2418                         | 0.065                      |
| 0.0128                             | 0.0344                     | 0.031                              | 9.3056                                       | 0.5721                                    | 0.1158                         | 0.1463                     |
| 0.0132                             | 0.1012                     | 0.0832                             | 7.0581                                       | 0.6503                                    | 0.3107                         | 0.1359                     |
| 0.0115                             | 0.0218                     | 0.0676                             | 0.8772                                       | 0.1265                                    | -0.381                         | 1.1677                     |
| 0.0137                             | 0.0838                     | 0.0776                             | 0.1647                                       | 0.5528                                    | 0.8332                         | 0.4096                     |
| 0.0087                             | 0.0485                     | 0.051                              | 0.7611                                       | 0.4663                                    | 0.4443                         | 0.4184                     |
| 0.0103                             | 0.0935                     | 0.0522                             | 7.4161                                       | 1.1363                                    | 0.3103                         | 0.1311                     |
| 0.0091                             | -0.0687                    | 0.0531                             | 9.0113                                       | 0.7086                                    | 0.291                          | 0.1208                     |
| 0.0075                             | 0.0045                     | 0.0271                             | 4.2481                                       | 0.0607                                    | 0.4832                         | 0.1287                     |
| 0.0086                             | -0.019                     | 0.0504                             | 2.7729                                       | 0.1507                                    | 0.7944                         | 0.065                      |
| 0.009                              | -0.0163                    | 0.0532                             | 0.3804                                       | 0.1193                                    | 0.8336                         | 0.2038                     |
| 0.016                              | 0.1323                     | 0.0854                             | 0.1065                                       | 0.9157                                    | 0.7                            | 1.0939                     |
| 0.0125                             | -0.0169                    | 0.0453                             | 1.7484                                       | 0.1487                                    | 0.6833                         | 0.1341                     |
| 0.0154                             | 0.0264                     | 0.0954                             | 1.6462                                       | 0.107                                     | 0.4535                         | 0.2484                     |
| 0.0086                             | 0.0149                     | 0.0508                             | 0.0709                                       | 0.1141                                    | 1.0362                         | 0.1915                     |

ference between population and direct, and difference between maternal and paternal effects. *P* values are given as  $-\log_{10}(P)$

**Supplementary Table 13. Cognitive Performance PGI Decomposition**

| Phenotype                              | Population | Population S.E. | Direct  | Direct S.E. | Population Minus Direct |
|----------------------------------------|------------|-----------------|---------|-------------|-------------------------|
| <i><u>Anthropometric:</u></i>          |            |                 |         |             |                         |
| BMI                                    | -0.0491    | 0.0047          | -0.0214 | 0.0071      | -0.0276                 |
| Height                                 | 0.0556     | 0.0048          | 0.0232  | 0.006       | 0.0324                  |
| <i><u>Cardiometabolic:</u></i>         |            |                 |         |             |                         |
| Blood Pressure (Diastolic)             | -0.0207    | 0.0051          | -0.0088 | 0.0084      | -0.0119                 |
| Blood Pressure (Systolic)              | -0.0297    | 0.0051          | -0.0196 | 0.0084      | -0.0101                 |
| Glucose                                | 0.0054     | 0.005           | 0.0158  | 0.009       | -0.0104                 |
| HDL Cholesterol                        | 0.0259     | 0.0054          | 0.0107  | 0.0082      | 0.0152                  |
| Non-HDL Cholesterol                    | -0.0075    | 0.0053          | -0.0103 | 0.0086      | 0.0028                  |
| <i><u>Cognitive and Education:</u></i> |            |                 |         |             |                         |
| Cognitive Performance                  | 0.2696     | 0.0064          | 0.2222  | 0.0099      | 0.0474                  |
| EA                                     | 0.1949     | 0.0046          | 0.1025  | 0.0064      | 0.0924                  |
| Vocabulary                             | 0.2202     | 0.0103          | 0.1704  | 0.0134      | 0.0498                  |
| <i><u>Fertility:</u></i>               |            |                 |         |             |                         |
| Age at First Birth (Women)             | 0.1253     | 0.0087          | 0.0807  | 0.0155      | 0.0446                  |
| Number of Children (Women)             | -0.0275    | 0.0072          | -0.0283 | 0.0133      | 0.0008                  |
| Number of Children (Men)               | -0.0276    | 0.0083          | -0.032  | 0.0157      | 0.0044                  |
| Number of Children (Pooled)            | -0.0217    | 0.0049          | -0.0291 | 0.0089      | 0.0073                  |
| <i><u>Income:</u></i>                  |            |                 |         |             |                         |
| Personal Income                        | 0.1475     | 0.0067          | 0.0753  | 0.0117      | 0.0722                  |
| Household Income                       | 0.0932     | 0.0053          | 0.0416  | 0.0092      | 0.0516                  |
| <i><u>Lung:</u></i>                    |            |                 |         |             |                         |
| FEV1                                   | 0.0418     | 0.0054          | 0.0167  | 0.0084      | 0.0251                  |
| <i><u>Overall Health:</u></i>          |            |                 |         |             |                         |
| Self Rated Health                      | 0.067      | 0.0051          | 0.0227  | 0.009       | 0.0443                  |
| <i><u>Psychiatric:</u></i>             |            |                 |         |             |                         |
| Depressive Symptoms                    | -0.0278    | 0.0051          | -0.011  | 0.0094      | -0.0167                 |
| Neuroticism                            | -0.0345    | 0.0053          | -0.0278 | 0.0089      | -0.0067                 |
| Subjective Well Being                  | -0.0094    | 0.0085          | -0.0227 | 0.0158      | 0.0133                  |
| <i><u>Smoking and Drinking:</u></i>    |            |                 |         |             |                         |
| Cigarettes per Day                     | -0.0084    | 0.0072          | 0.0054  | 0.0129      | -0.0138                 |
| Drinks per Week                        | 0.0424     | 0.0069          | 0.014   | 0.0129      | 0.0283                  |
| Ever Smoker                            | -0.0314    | 0.005           | -0.0178 | 0.0084      | -0.0136                 |

*Notes:* This table gives meta-analysis estimates (from UK Biobank, Generation Scotland, and the Swedish Twin Registry) for the direct effect of each phenotype on cognitive performance. The direct effects are given as  $-\log_{10}(P)$  from a two-sided Z-test for non-zero difference between population and direct, and between maternal and paternal effects.

| Population<br>Minus Direct<br>S.E. | Maternal<br>Minus Paternal | Maternal<br>Minus Paternal<br>S.E. | Population<br>Minus Direct<br><i>P</i> value | Maternal<br>Minus Paternal<br><i>P</i> value | Direct-<br>Population<br>Ratio | Direct-<br>Population S.E. |
|------------------------------------|----------------------------|------------------------------------|----------------------------------------------|----------------------------------------------|--------------------------------|----------------------------|
| 0.0065                             | 0.0329                     | 0.0263                             | 4.711                                        | 0.6749                                       | 0.4365                         | 0.1313                     |
| 0.0059                             | -0.0327                    | 0.026                              | 7.3536                                       | 0.6819                                       | 0.4169                         | 0.0986                     |
| 0.0073                             | -0.001                     | 0.0257                             | 0.9788                                       | 0.0141                                       | 0.4253                         | 0.3649                     |
| 0.0073                             | 0.0002                     | 0.0257                             | 0.7732                                       | 0.0028                                       | 0.6609                         | 0.2455                     |
| 0.0077                             | -0.033                     | 0.0256                             | 0.7587                                       | 0.7075                                       | 2.9414                         | 2.3543                     |
| 0.0073                             | -0.0068                    | 0.027                              | 1.4219                                       | 0.0964                                       | 0.412                          | 0.2848                     |
| 0.0075                             | 0.0114                     | 0.0268                             | 0.1483                                       | 0.1735                                       | 1.3715                         | 1.0702                     |
| 0.009                              | 0.0271                     | 0.0284                             | 6.9159                                       | 0.4686                                       | 0.8242                         | 0.0326                     |
| 0.0061                             | -0.0029                    | 0.0261                             | 50.8108                                      | 0.0404                                       | 0.526                          | 0.0298                     |
| 0.0126                             | 0.0041                     | 0.0306                             | 4.1355                                       | 0.0488                                       | 0.7739                         | 0.0545                     |
| 0.0135                             | 0.0079                     | 0.0845                             | 2.9991                                       | 0.0335                                       | 0.6441                         | 0.1089                     |
| 0.0115                             | 0.0535                     | 0.0664                             | 0.0238                                       | 0.3766                                       | 1.0279                         | 0.4183                     |
| 0.0136                             | -0.0596                    | 0.0707                             | 0.1256                                       | 0.3988                                       | 1.1575                         | 0.4959                     |
| 0.0079                             | 0.0004                     | 0.0484                             | 0.4542                                       | 0.0031                                       | 1.337                          | 0.3757                     |
| 0.0103                             | -0.0226                    | 0.05                               | 11.522                                       | 0.1866                                       | 0.5105                         | 0.0712                     |
| 0.0082                             | 0.0217                     | 0.05                               | 9.5356                                       | 0.1776                                       | 0.4464                         | 0.0892                     |
| 0.0074                             | -0.0376                    | 0.027                              | 3.138                                        | 0.7846                                       | 0.4002                         | 0.1813                     |
| 0.008                              | 0.0255                     | 0.0484                             | 7.5672                                       | 0.2236                                       | 0.3392                         | 0.1246                     |
| 0.0082                             | -0.0415                    | 0.0501                             | 1.3866                                       | 0.3906                                       | 0.3973                         | 0.3078                     |
| 0.0077                             | 0.0045                     | 0.0259                             | 0.413                                        | 0.0645                                       | 0.8063                         | 0.2223                     |
| 0.0138                             | -0.1442                    | 0.0857                             | 0.4762                                       | 1.034                                        | 2.4227                         | 2.0079                     |
| 0.0113                             | 0.0109                     | 0.0435                             | 0.6558                                       | 0.0958                                       | -0.6512                        | 1.8838                     |
| 0.0114                             | 0.034                      | 0.0816                             | 1.8966                                       | 0.1693                                       | 0.3313                         | 0.2822                     |
| 0.0076                             | -0.0711                    | 0.0487                             | 1.1455                                       | 0.8391                                       | 0.5659                         | 0.2399                     |

irect, population, difference between population and direct, and difference between maternal and paternal effects. *P* values  
rnal effects.

**Table 14. Summary Overview of Mate-Pair PGI Analyses**

|                             |            |         |         |                   |                  |       | EA                   |
|-----------------------------|------------|---------|---------|-------------------|------------------|-------|----------------------|
| PGI trait correlation       |            |         |         |                   |                  |       | PGI                  |
| Mate-Pair Correlation:      | Phenotypic | Fathers | Mothers | PGI,<br>Predicted | PGI,<br>observed | EA    | Cubic function of EA |
| <u>UKB:</u>                 |            |         |         |                   |                  |       |                      |
| Est                         | 0.465      | 0.297   | 0.307   | 0.042             | 0.174            | 0.082 | 0.084                |
| S.E.                        | 0.027      | 0.031   | 0.031   | 0.008             | 0.033            | 0.034 | 0.034                |
| N                           | 861        |         |         |                   |                  |       |                      |
| <u>Generation Scotland:</u> |            |         |         |                   |                  |       |                      |
| Est                         | 0.406      | 0.261   | 0.259   | 0.027             | 0.175            | 0.126 | 0.123                |
| S.E.                        | 0.022      | 0.024   | 0.024   | 0.004             | 0.024            | 0.026 | 0.026                |
| N                           | 1483       |         |         |                   |                  |       |                      |
| <u>Pooled:</u>              |            |         |         |                   |                  |       |                      |
| Est                         | 0.430      | 0.274   | 0.276   | 0.031             | 0.175            | 0.110 | 0.109                |
| S.E.                        | 0.017      | 0.019   | 0.019   | 0.004             | 0.020            | 0.021 | 0.021                |



| Residualized on... |                   |                                   | BMI                   |         |         |                   |                  |        |
|--------------------|-------------------|-----------------------------------|-----------------------|---------|---------|-------------------|------------------|--------|
|                    |                   |                                   | PGI trait correlation |         |         |                   |                  | PGI    |
| EA+40 PCs          | EA+40PCs+CP+VOCAB | EA+40PCs+Birth Coordinates+Center | Phenotypic            | Fathers | Mothers | PGI,<br>Predicted | PGI,<br>observed | BMI    |
| 0.051              | NA                | 0.042                             | 0.242                 | 0.382   | 0.322   | 0.030             | 0.027            | 0.016  |
| 0.034              | NA                | 0.035                             | 0.032                 | 0.031   | 0.031   | 0.006             | 0.033            | 0.034  |
|                    |                   |                                   | 857                   |         |         |                   |                  |        |
| 0.113              | 0.083             | NA                                | 0.228                 | 0.382   | 0.376   | 0.033             | 0.001            | -0.018 |
| 0.026              | 0.027             | NA                                | 0.022                 | 0.024   | 0.022   | 0.005             | 0.025            | 0.025  |
|                    |                   |                                   | 1581                  |         |         |                   |                  |        |
| 0.091              | NA                | NA                                | 0.233                 | 0.382   | 0.358   | 0.032             | 0.010            | -0.006 |
| 0.021              | NA                | NA                                | 0.019                 | 0.017   | 0.018   | 0.004             | 0.020            | 0.020  |

|                       |            | Cog Perf              |         |         |           |               |                    |                      |
|-----------------------|------------|-----------------------|---------|---------|-----------|---------------|--------------------|----------------------|
| I Residualized on...  |            | PGI trait correlation |         |         |           |               | PGI Residualized c |                      |
| Cubic function of BMI | BMI+40 PCs | Phenotypic            | Fathers | Mothers | PGI,      | PGI, observed | CP                 | Cubic function of CP |
|                       |            |                       |         |         | Predicted |               |                    |                      |
| 0.016                 | 0.001      | 0.139                 | 0.246   | 0.366   | 0.013     | 0.019         | 0.082              | 0.128                |
| 0.035                 | 0.034      | 0.067                 | 0.062   | 0.058   | 0.008     | 0.034         | 0.068              | 0.067                |
|                       |            | 218                   |         |         |           |               |                    |                      |
| -0.018                | -0.018     | 0.242                 | 0.195   | 0.180   | 0.008     | 0.024         | -0.039             | 0.011                |
| 0.025                 | 0.025      | 0.024                 | 0.024   | 0.024   | 0.002     | 0.025         | 0.026              | 0.026                |
|                       |            | 1535                  |         |         |           |               |                    |                      |
| -0.006                | -0.012     | 0.230                 | 0.202   | 0.208   | 0.009     | 0.022         | 0.023              | 0.026                |
| 0.020                 | 0.020      | 0.023                 | 0.023   | 0.023   | 0.002     | 0.020         | 0.024              | 0.024                |

|           |       | Height                |         |         |                        |                  |        |                          |               |
|-----------|-------|-----------------------|---------|---------|------------------------|------------------|--------|--------------------------|---------------|
| on...     |       | PGI trait correlation |         |         | PGI Residualized on... |                  |        |                          |               |
| CP+40 PCs |       | Phenotypic            | Fathers | Mothers | PGI,<br>Predicted      | PGI,<br>observed | Height | Cubic function of height | Height+40 PCs |
|           |       | 0.035                 | 0.247   | 0.529   | 0.580                  | 0.076            | 0.052  | 0.003                    | 0.001         |
| 0.068     | 0.032 | 0.025                 | 0.023   | 0.012   | 0.034                  | 0.035            | 0.035  | 0.035                    |               |
|           |       | 858                   |         |         |                        |                  |        |                          |               |
| 0.017     | 0.311 | 0.517                 | 0.579   | 0.093   | 0.133                  | 0.053            | 0.055  | 0.036                    |               |
| 0.026     | 0.023 | 0.018                 | 0.017   | 0.009   | 0.025                  | 0.025            | 0.025  | 0.025                    |               |
|           |       | 1593                  |         |         |                        |                  |        |                          |               |
| 0.019     | 0.290 | 0.521                 | 0.579   | 0.087   | 0.106                  | 0.036            | 0.037  | 0.030                    |               |
| 0.024     | 0.018 | 0.015                 | 0.013   | 0.007   | 0.020                  | 0.020            | 0.020  | 0.020                    |               |

**Supplementary Table 15. Description of new data included in the genome-wide association study of educational attainment**

**Panel A. Cohorts**

| Study                    | Full name                 | Sampling         | Country        | N         |              |
|--------------------------|---------------------------|------------------|----------------|-----------|--------------|
|                          |                           |                  |                | <i>N</i>  | <i>N</i> EA3 |
| 23andMe                  | 23andMe, Inc              | Genomics company | Primarily US   | 2,272,216 | 365,538      |
| EA3 excl UKB and 23andMe |                           | See [3]          |                | 324,162   | 324,162      |
| UKB                      | UK Biobank (Full Release) | Population-based | United Kingdom | 441,121   | 442,183      |

**Panel B. Cohort-level educational attainment measures and phenotype distribution**

| Study                    | Educational attainment measure(s)                                                  | Coding (US Years of Schooling)                                                                                                            | <i>EduYears</i> mean (SD) |
|--------------------------|------------------------------------------------------------------------------------|-------------------------------------------------------------------------------------------------------------------------------------------|---------------------------|
| 23andMe                  | What is the highest level of education you have completed?                         | 1) 10<br>2) 12<br>3) 14<br>4) 16<br>5) 19<br>6) 22                                                                                        | 15.71 (2.65)              |
| EA3 excl UKB and 23andMe | See [3]                                                                            |                                                                                                                                           | 13.58 (3.72)              |
| UKB                      | Which of the following qualifications do you have? (You can select more than one)? | 1) 20<br>2) 13<br>3) 10<br>4) 10<br>5) Age left schooling - 5<br>6) 15<br>7) 7<br>8) Excluded<br>Highest category assigned to respondents | 15.23 (5.55)              |

**Panel C. Genotyping and imputation**

| Study | Platform | SNP level exclusions |           |                     |                  |
|-------|----------|----------------------|-----------|---------------------|------------------|
|       |          | MAF                  | Call rate | HWE <i>P</i> -value | Other exclusion: |

|                          |                                                                                                                                                                                                                                                                                                                                                                                                                                                                                                                                                                                           |       |      |            |                                                                                                              |
|--------------------------|-------------------------------------------------------------------------------------------------------------------------------------------------------------------------------------------------------------------------------------------------------------------------------------------------------------------------------------------------------------------------------------------------------------------------------------------------------------------------------------------------------------------------------------------------------------------------------------------|-------|------|------------|--------------------------------------------------------------------------------------------------------------|
| 23andMe                  | v1-v2: Two variants of Illumina HumanHap550+ BeadChip (including about 25,000 custom SNPs selected by 23andMe, with a total of about 560,000 SNPs),<br>v3: Illumina OmniExpress+ BeadChip with custom content (950,000 SNPs),<br>v4: Illumina custom array including a lower redundancy subset of v2 and v3 SNPs with additional coverage of lower-frequency coding variation, and about 570,000 SNPs,<br>v5: Illumina Infinium Global Screening Array (~640,000 SNPs) supplemented with ~50,000 SNPs of custom content, specifically designed to better capture global genetic diversity | 0.001 | 0.95 | $10^{-20}$ | 1) Correlation with sequence data $\leq 0.9$<br><br>2) Frequency inconsistent with gnomAD ( $ Z  \geq 100$ ) |
| EA3 excl UKB and 23andMe | See [3]                                                                                                                                                                                                                                                                                                                                                                                                                                                                                                                                                                                   |       |      |            |                                                                                                              |
| UKB                      | See [6]                                                                                                                                                                                                                                                                                                                                                                                                                                                                                                                                                                                   |       |      |            |                                                                                                              |

Notes : "Call rate" under SNP-level quality controls refers to the minimum percentage of successfully genotyped SNPs required for the fraction of SNPs successfully genotyped in order for the subject to be retained in the sample. MAF: Minor allele frequency. HWE: Hardy

## References

- [1] Eriksson, N. *et al.* Web-Based, Participant-Driven Studies Yield Novel Genetic Associations for Common Traits. *PLoS Genet*
- [2] Tung, J. Y. *et al.* Efficient replication of over 180 genetic associations with self-reported medical data. *PLoS One* **6**, e234
- [3] Lee, J. J. *et al.* Gene discovery and polygenic prediction from a genome-wide association study of educational attainment in
- [4] Marchini, J. *et al.* Genotype imputation and genetic association studies of UK Biobank: Interim Data Release. (2015). *Acc*
- [5] Sudlow, C. *et al.* UK Biobank: An open access resource for identifying the causes of a wide range of complex diseases of
- [6] Bycroft, C. *et al.* Genome-wide genetic data on ~500,000 UK Biobank Participants. *bioRxiv*, preprint first posted online J

| Additive GWAS  |                            |                    | Dominance GWAS |                            |                    | Cohort profile |
|----------------|----------------------------|--------------------|----------------|----------------------------|--------------------|----------------|
| $\Delta N$ EA4 | Birth year<br>(Mean/Range) | Fraction<br>female | $N$            | Birth year<br>(Mean/Range) | Fraction<br>female |                |
| 1,906,678      | 1969<br>(1901-2003)        | 0.56               | 2,272,216      | 1969<br>(1901-2003)        | 0.56               | [1], [2]       |
| 0              | See [3]                    |                    | N/A            | N/A                        | N/A                | [3]            |
| -1,062         | 1951<br>(1934-1970)        | 0.54               | 302,037        | 1951<br>(1936-1970)        | 0.54               | [4],[5],[6]    |

| Subject level exclusions |                  | Imputation software and reference sample |                 |        |
|--------------------------|------------------|------------------------------------------|-----------------|--------|
| Call rate                | Other exclusions | Software                                 | Reference panel | Sample |

|      |                                                                                                                                                                                                                                                                       |          |                                                                                                                 |     |
|------|-----------------------------------------------------------------------------------------------------------------------------------------------------------------------------------------------------------------------------------------------------------------------|----------|-----------------------------------------------------------------------------------------------------------------|-----|
| 0.99 | 1) Close relatives (>700 cM IBD)<br>2) Non-European ancestries and ancestry outliers (European + Middle Eastern < 0.97, European < 0.90) (see <a href="https://www.23andme.com/ancestry-composition-guide/">https://www.23andme.com/ancestry-composition-guide/</a> ) | Minimac3 | Combination of May 2015 release of the 1000 Genomes Phase 3 haplotypes and the UK10K imputation reference panel | All |
|------|-----------------------------------------------------------------------------------------------------------------------------------------------------------------------------------------------------------------------------------------------------------------------|----------|-----------------------------------------------------------------------------------------------------------------|-----|

---

SNP to be included in the set of genotyped SNPs. "Call rate" under subject-level exclusions is the minimum  $\gamma$ -Weinberg equilibrium.

*enet*. **6**, e1000993 (2010).

73 (2011).

n 1.1 million individuals. *Nat. Genet.* **50**, 1112–1121 (2018).

available at: [https://biobank.ctsu.ox.ac.uk/crystal/docs/impute\\_ukb\\_v1.pdf](https://biobank.ctsu.ox.ac.uk/crystal/docs/impute_ukb_v1.pdf)

middle and old age. *PLoS Med.* **12**, e1001779 (2015).

ul. 20, 2017; doi: <http://dx.doi.org/10.1101/166298>

**Supplementary Table 16. Description of SNP filtering in *EduYears* analyses**

| Cohort                                    | #SNPs before QC             |        |                                                      | #SNPs dropped at each filtering s |                            |        |
|-------------------------------------------|-----------------------------|--------|------------------------------------------------------|-----------------------------------|----------------------------|--------|
|                                           | #1 Missing / invalid values | #2 MAF | #3 Genotyped marker HWE $P$ value / Call rate < 0.95 | #4 Imputation accuracy            | #5 S.E. Ratio < 0.5 or > 2 |        |
| <b>Panel A. Main <i>EduYears</i> GWAS</b> |                             |        |                                                      |                                   |                            |        |
| 23andMe - additive                        | 13,297,644                  | 13,692 | 13,825                                               | 392                               | 864,230                    | 0      |
| 23andMe - dominance                       | 13,296,768                  | 6,277  | 4,074,201                                            | 392                               | 1,600,807                  | 43,380 |
| UKB - additive                            | 17,540,466                  | 7      | 3,004,233                                            | 103,604                           | 0                          | 9      |
| UKB - dominance                           | 8,891,332                   | 355    | 44,540                                               | 71,600                            | 328,795                    | 12,711 |
| <b>Panel B. X chromosome GWAS</b>         |                             |        |                                                      |                                   |                            |        |
| 23andMe - X chr                           | 346,055                     | 375    | 407                                                  | 156                               | 37,855                     | N/A    |
| UKB - X chr                               | 1,165,215                   | 0      | 579,027                                              | 493                               | 153,671                    | N/A    |
| <b>Panel C. Supplementary GWAS</b>        |                             |        |                                                      |                                   |                            |        |
| UKB unrelated - <i>EduYears</i>           | 17,540,466                  | 9      | 3,003,275                                            | 103,604                           | 0                          | 11     |
| UKB unrelated - BMI                       | 17,540,466                  | 9      | 3,003,107                                            | 103,604                           | 0                          | 11     |
| UKB unrelated - Height                    | 17,540,466                  | 9      | 3,003,336                                            | 103,604                           | 0                          | 2      |
| UKB unrelated - Cognitive performance     | 17,540,466                  | 157    | 3,002,285                                            | 103,604                           | 0                          | 12     |
| Locke et al. - BMI                        | 2,526,987                   | 53,041 | 12                                                   | 0                                 | 0                          | 27,513 |
| Trampush et al. - Cognitive performance   | 8,040,130                   | 0      | 0                                                    | 0                                 | 137,311                    | 23     |
| Wood et al. - Height                      | 2,520,184                   | 1,821  | 3,738                                                | 0                                 | 0                          | 12,268 |

*Notes*: "Missing / invalid values" refers to missing or invalid values for effect allele frequency,  $Beta$ , S.E.,  $P$  value, imputation accuracy. The MAF thresholds were 0.1% for the additive GWAS (including all GWAS in Panels B and C) and 1% for the dominance GWAS. "HWE" refers to Hardy-Weinberg equilibrium exact test". HWE  $P$  value thresholds were  $10^{-20}$  for the autosomal GWAS.  $R^2$  (explained variance) filter was omitted from the table because it was not used for the X chromosome GWAS.



step #SNPs after QC  $\lambda_{GC}$  Max  $N$

| #6 INDEL  | #7 Non-autosomal marker | #8 Invalid or duplicated position / Allele mismatch |            |       |           |  |
|-----------|-------------------------|-----------------------------------------------------|------------|-------|-----------|--|
| 1,338,484 | 269,729                 | 1,311,072                                           | 9,486,220  | 3.581 | 2,272,216 |  |
| 811,335   | 114,862                 | 511,519                                             | 6,133,995  | 1.009 | 2,272,216 |  |
| 1,402,674 | 0                       | 2,060,753                                           | 10,969,186 | 1.694 | 441,121   |  |
| 742,642   | 0                       | 541,130                                             | 7,149,559  | 1.012 | 302,037   |  |
| 37,600    | N/A                     | 40,663                                              | 228,999    | 3.950 | 2,272,216 |  |
| 39,860    | N/A                     | 59,101                                              | 333,063    | 1.624 | 440,817   |  |
| 1,402,802 | 0                       | 2,060,393                                           | 10,970,372 | 1.624 | 383,050   |  |
| 1,402,799 | 0                       | 2,060,387                                           | 10,970,549 | 1.694 | 380,783   |  |
| 1,402,785 | 0                       | 2,060,381                                           | 10,970,349 | 2.001 | 386,541   |  |
| 1,403,246 | 0                       | 2,053,768                                           | 10,977,394 | 1.369 | 197,076   |  |
| 0         | 0                       | 7,357                                               | 2,439,064  | 1.073 | 322,154   |  |
| 0         | 0                       | 12,524                                              | 7,890,272  | 1.108 | 35,298    |  |
| 0         | 0                       | 7,316                                               | 2,495,041  | 1.920 | 253,280   |  |

accuracy, or the imputed/genotyped indicator. "MAF" refers to minor allele frequency. . The imputation accuracy thresholds were 0.7 for the additive GWAS and 0.9 for the al GWAS and  $10^{-10}$  for the X chromosome GWAS. "S.E. Ratio" refers to the ratio of o variants were dropped. The S.E. ratio and  $R^2$  filters were not applied to the X

**Supplementary Table 17. Results from UKB X chromosome analyses under different MAF cutoffs**

|              | $N_{male}$ | $N_{female}$ | Number of SNPs | $\hat{\lambda}_{GC,male}$ | $\hat{\lambda}_{GC,female}$ | $r_g$ | S.E.( $r_g$ ) | DC ratio |
|--------------|------------|--------------|----------------|---------------------------|-----------------------------|-------|---------------|----------|
| MAF > 0.0001 | 201456     | 239361       | 1165370        | 1.18                      | 1.29                        | 0.94  | 0.029         | 0.76     |
| MAF > 0.001  | 201456     | 239361       | 580701         | 1.33                      | 1.51                        | 0.93  | 0.029         | 0.76     |
| MAF > 0.01   | 201456     | 239361       | 309007         | 1.55                      | 1.84                        | 0.94  | 0.03          | 0.78     |

Notes:  $r_g$  is the genetic correlation between males and females. "DC" is dosage compensation.

| <b>S.E.(DC ratio)</b> | <b><math>h^2_{male}</math></b> | <b><math>h^2_{female}</math></b> | <b>Mean <math>\chi^2</math> - no DC</b> | <b>Mean <math>\chi^2</math> - full DC</b> |
|-----------------------|--------------------------------|----------------------------------|-----------------------------------------|-------------------------------------------|
| 0.23                  | 0.0012                         | 0.0016                           | 1.45                                    | 1.43                                      |
| 0.14                  | 0.0021                         | 0.0028                           | 1.81                                    | 1.77                                      |
| 0.1                   | 0.0036                         | 0.0046                           | 2.35                                    | 2.29                                      |

**Supplementary Table 18. Decomposition of the variation in the estimates of  $d_{j,sta}$  and of  $\alpha_{j,sta}$** 

| Sets of SNPs        | Decomposition of the variation in   |                                  |
|---------------------|-------------------------------------|----------------------------------|
|                     | $\hat{\text{Var}}(\hat{d}_{j,sta})$ | $\hat{\text{E}}[\sigma^2_{d,j}]$ |
| All SNPs            | 2.61E-06                            | 2.59E-06                         |
| MAF in [0.01, 0.02] | 1.32E-05                            | 1.30E-05                         |
| MAF in [0.02, 0.03] | 7.92E-06                            | 7.88E-06                         |
| MAF in [0.03, 0.04] | 5.47E-06                            | 5.51E-06                         |
| MAF in [0.04, 0.05] | 4.20E-06                            | 4.23E-06                         |
| MAF in [0.05, 0.07] | 3.23E-06                            | 3.15E-06                         |
| MAF in [0.07, 0.09] | 2.32E-06                            | 2.30E-06                         |
| MAF in [0.09, 0.11] | 1.79E-06                            | 1.80E-06                         |
| MAF in [0.11, 0.13] | 1.49E-06                            | 1.47E-06                         |
| MAF in [0.13, 0.15] | 1.25E-06                            | 1.24E-06                         |
| MAF in [0.15, 0.18] | 1.04E-06                            | 1.04E-06                         |
| MAF in [0.18, 0.21] | 8.53E-07                            | 8.59E-07                         |
| MAF in [0.21, 0.24] | 7.20E-07                            | 7.34E-07                         |
| MAF in [0.24, 0.27] | 6.35E-07                            | 6.41E-07                         |
| MAF in [0.27, 0.30] | 5.79E-07                            | 5.72E-07                         |
| MAF in [0.30, 0.35] | 5.11E-07                            | 5.03E-07                         |
| MAF in [0.35, 0.40] | 4.53E-07                            | 4.45E-07                         |
| MAF in [0.40, 0.45] | 4.12E-07                            | 4.11E-07                         |
| MAF in [0.45, 0.5]  | 3.94E-07                            | 3.95E-07                         |

Notes: The table shows the results of the decomposition of  $\hat{\text{Var}}(\hat{d}_{j,sta})$  (the estimated variance in the standardized additive effect sizes  $\alpha_{j,sta}$ ). As shown in the Supplementary Note,  $\hat{\text{Var}}(\hat{d}_{j,sta}) = \hat{\text{Var}}(d_j)$  effect sizes. We can similarly decompose  $\hat{\text{Var}}(\hat{\alpha}_{j,sta})$ . Supplementary Note 4.5 provides further details.

**l for various set of SNPs**

| estimates of $d_{j,std}$ | Decomposition of the variation in                                 |                                          |
|--------------------------|-------------------------------------------------------------------|------------------------------------------|
|                          | $\hat{\text{Var}}(d_{j,std}) / \hat{\text{Var}}(\hat{d}_{j,std})$ | $\hat{\text{Var}}(\hat{\alpha}_{j,std})$ |
| 0.68%                    | 2.43E-06                                                          | 4.92E-07                                 |
| 1.01%                    | 1.27E-06                                                          | 5.65E-07                                 |
| 0.56%                    | 1.45E-06                                                          | 4.88E-07                                 |
| -0.82%                   | 1.68E-06                                                          | 4.57E-07                                 |
| -0.70%                   | 1.72E-06                                                          | 4.38E-07                                 |
| 2.59%                    | 1.94E-06                                                          | 4.34E-07                                 |
| 0.76%                    | 2.26E-06                                                          | 4.19E-07                                 |
| -0.65%                   | 2.59E-06                                                          | 4.11E-07                                 |
| 1.45%                    | 2.78E-06                                                          | 4.00E-07                                 |
| 1.05%                    | 2.88E-06                                                          | 3.99E-07                                 |
| 0.44%                    | 3.30E-06                                                          | 3.93E-07                                 |
| -0.72%                   | 3.55E-06                                                          | 3.90E-07                                 |
| -1.92%                   | 4.69E-06                                                          | 3.87E-07                                 |
| -0.89%                   | 3.80E-06                                                          | 3.85E-07                                 |
| 1.27%                    | 4.07E-06                                                          | 3.83E-07                                 |
| 1.71%                    | 4.36E-06                                                          | 3.81E-07                                 |
| 1.71%                    | 4.42E-06                                                          | 3.84E-07                                 |
| 0.40%                    | 4.47E-06                                                          | 3.83E-07                                 |
| -0.16%                   | 4.85E-06                                                          | 3.84E-07                                 |

estimates of the true standardized dominance effect sizes  $d_{j,std}$  and of  $\hat{\text{Var}}(\hat{\alpha}_{j,std})$  (the estimated variance  $\hat{\text{Var}}(d_{j,std}) + \hat{\text{E}}[\sigma_{d,j}^2]$ ).  $\hat{\text{Var}}(d_{j,std}) / \hat{\text{Var}}(\hat{d}_{j,std})$  is the ratio of the variance in the true dominance effect sizes over the v  
iils.

---

estimates of  $\alpha_{j,std}$

---


$$\hat{\text{Var}}(\alpha_{j,std}) / \hat{\text{Var}}(\hat{\alpha}_{j,std})$$


---

|        |
|--------|
| 79.77% |
| 55.54% |
| 66.36% |
| 72.83% |
| 74.53% |
| 77.66% |
| 81.45% |
| 84.12% |
| 85.60% |
| 86.14% |
| 88.07% |
| 89.01% |
| 91.75% |
| 89.86% |
| 90.58% |
| 91.26% |
| 91.31% |
| 91.43% |
| 92.08% |

---

in the estimates of the true  
variance in the estimated dominance

**Supplementary Table 19. Actual and expected replication record for the UKB->23andMe replication of the**

| <b>Panel A: UKB-&gt;23andMe replication</b>                        |                                                                      |                                                                       |
|--------------------------------------------------------------------|----------------------------------------------------------------------|-----------------------------------------------------------------------|
|                                                                    | SNPs with $P$ value $\leq 1$<br>in the UKB GWAS<br>( $M = 164,406$ ) | SNPs with $P$ value $\leq 0.01$<br>in the UKB GWAS<br>( $M = 8,262$ ) |
| <b>Panel A.1: UKB-&gt;23andMe replication: test (i)</b>            |                                                                      |                                                                       |
| Panel A.1.i: Actual replication record                             |                                                                      |                                                                       |
|                                                                    | 0.5028<br>$P = 0.01$                                                 | 0.4938<br>$P = 0.87$                                                  |
| Panel A.1.ii: Statistical power of the test as a function of the : |                                                                      |                                                                       |
| $\Omega = 1e-4$                                                    | 5.9%                                                                 | 8.9%                                                                  |
| 1e-3                                                               | 19.1%                                                                | 66.8%                                                                 |
| 0.01                                                               | <b>100.0%</b>                                                        | <b>100.0%</b>                                                         |
| 0.1                                                                | <b>100.0%</b>                                                        | <b>100.0%</b>                                                         |
| 0.25                                                               | <b>100.0%</b>                                                        | <b>100.0%</b>                                                         |
| 0.5                                                                | <b>100.0%</b>                                                        | <b>100.0%</b>                                                         |
| 0.75                                                               | <b>100.0%</b>                                                        | <b>100.0%</b>                                                         |
| 1                                                                  | <b>100.0%</b>                                                        | <b>100.0%</b>                                                         |
| Panel A.1.iii: Expected replication record as a function of the :  |                                                                      |                                                                       |
| $\Omega = 1e-4$                                                    | 0.5001<br>(0.0012)                                                   | 0.5008<br>(0.0056)                                                    |
| 1e-3                                                               | 0.5009<br>(0.0012)                                                   | 0.5113<br>(0.0053)                                                    |
| 0.01                                                               | 0.5057<br>(0.0013)                                                   | 0.5485<br>(0.0054)                                                    |
| 0.1                                                                | 0.5149<br>(0.0012)                                                   | 0.5640<br>(0.0054)                                                    |
| 0.25                                                               | 0.5185<br>(0.0012)                                                   | 0.5644<br>(0.0053)                                                    |
| 0.5                                                                | 0.5209<br>(0.0012)                                                   | 0.5656<br>(0.0056)                                                    |
| 0.75                                                               | 0.5220<br>(0.0012)                                                   | 0.5666<br>(0.0055)                                                    |
| 1                                                                  | 0.5228<br>(0.0012)                                                   | 0.5669<br>(0.0053)                                                    |
| <b>Panel A.2: UKB-&gt;23andMe replication: test (ii)</b>           |                                                                      |                                                                       |
| Panel A.2.i: Actual replication record                             |                                                                      |                                                                       |
|                                                                    | 0.0503<br>$P = 0.29$                                                 | 0.0466<br>$P = 0.92$                                                  |
| Panel A.2.ii: Statistical power of the test as a function of the : |                                                                      |                                                                       |
| $\Omega = 1e-4$                                                    | 6.9%                                                                 | 21.3%                                                                 |
| 1e-3                                                               | <b>92.6%</b>                                                         | <b>100.0%</b>                                                         |
| 0.01                                                               | <b>100.0%</b>                                                        | <b>100.0%</b>                                                         |
| 0.1                                                                | <b>100.0%</b>                                                        | <b>100.0%</b>                                                         |
| 0.25                                                               | <b>100.0%</b>                                                        | <b>100.0%</b>                                                         |
| 0.5                                                                | <b>100.0%</b>                                                        | <b>100.0%</b>                                                         |

|                                                                 | 0.75 | 100.0%             | 100.0%             |
|-----------------------------------------------------------------|------|--------------------|--------------------|
|                                                                 | 1    | 100.0%             | 100.0%             |
| Panel A.2.iii: Expected replication record as a function of the |      |                    |                    |
| <i>Omega</i> = 1e-4                                             |      | 0.0501<br>(0.0005) | 0.0519<br>(0.0025) |
|                                                                 | 1e-3 | 0.0517<br>(0.0005) | 0.0715<br>(0.0027) |
|                                                                 | 0.01 | 0.0598<br>(0.0006) | 0.1387<br>(0.0037) |
|                                                                 | 0.1  | 0.0700<br>(0.0006) | 0.1407<br>(0.0039) |
|                                                                 | 0.25 | 0.0705<br>(0.0006) | 0.1185<br>(0.0034) |
|                                                                 | 0.5  | 0.0696<br>(0.0006) | 0.1039<br>(0.0034) |
|                                                                 | 0.75 | 0.0690<br>(0.0006) | 0.0974<br>(0.0033) |
|                                                                 | 1    | 0.0686<br>(0.0006) | 0.0938<br>(0.0032) |

Notes: Panel A shows the actual and simulated replication record for the replication of the UKB dominance GWA test (i) as a function of the assumed value of omega (Panel A.1.ii), and the expected replication record and its standard deviation computed using simulations for various assumed values of omega (the fraction of nonnull SNPs). In Panel A.1.ii,  $\alpha$  Panel A.2 mirrors Panel A.1 but shows the actual and simulated replication record for test (ii), and Panel B mirrors Test (i) (the sign test, in Panels A.1.i and B.1.i) is a binomial test of the null hypothesis that a fraction 0.5 of the test values smaller than 0.1 in the replication cohort. Supplementary Note 4.6 provides further details.



**re dominance GWAS**

**n**

SNPs with  $P$  value  $\leq 1e-4$   
in the UKB GWAS  
( $M = 149$ )

SNPs with  $P$  value  $\leq 1e-6$   
in the UKB GWAS  
( $M = 1$ )

**(the sign test)**

0.5302  
 $P = 0.21$

1  
 $P = 0.00$

assumed value of omega

|               |              |
|---------------|--------------|
| 14.4%         | 76.9%        |
| <b>100.0%</b> | <b>98.8%</b> |
| <b>100.0%</b> | <b>99.6%</b> |
| <b>98.5%</b>  | <b>91.9%</b> |
| <b>91.8%</b>  | 76.0%        |
| <b>83.7%</b>  | 74.3%        |
| <b>81.8%</b>  | 69.5%        |
| 77.6%         | 72.5%        |

Omega = 1e-4  
1e-3  
0.01  
0.1  
0.25  
0.5  
0.75  
1

assumed value of omega

|                    |                    |
|--------------------|--------------------|
| 0.5256<br>(0.0400) | 0.7690<br>(0.4217) |
| 0.6839<br>(0.0371) | 0.9880<br>(0.1089) |
| 0.7588<br>(0.0336) | 0.9960<br>(0.0632) |
| 0.6526<br>(0.0369) | 0.9190<br>(0.2730) |
| 0.6195<br>(0.0379) | 0.7600<br>(0.4273) |
| 0.6065<br>(0.0391) | 0.7430<br>(0.4372) |
| 0.6020<br>(0.0390) | 0.6950<br>(0.4606) |
| 0.5983<br>(0.0403) | 0.7250<br>(0.4467) |

Omega = 1e-4  
1e-3  
0.01  
0.1  
0.25  
0.5  
0.75  
1

**test (ii)**

0.0537  
 $P = 0.33$

0  
 $P = 0.05$

assumed value of omega

|               |              |
|---------------|--------------|
| <b>85.1%</b>  | 56.2%        |
| <b>100.0%</b> | <b>97.1%</b> |
| <b>100.0%</b> | <b>99.2%</b> |
| <b>100.0%</b> | <b>79.7%</b> |
| <b>100.0%</b> | 44.2%        |
| <b>99.4%</b>  | 28.9%        |

Omega = 1e-4  
1e-3  
0.01  
0.1  
0.25  
0.5

|                        | <b>96.2%</b> | 21.5%    | 0.75         |
|------------------------|--------------|----------|--------------|
|                        | <b>92.7%</b> | 18.7%    | 1            |
| assumed value of omega |              |          |              |
|                        | 0.1021       | 0.5620   | Omega = 1e-4 |
|                        | (0.0242)     | (0.4964) |              |
|                        | 0.3973       | 0.9710   | 1e-3         |
|                        | (0.0372)     | (0.1679) |              |
|                        | 0.5376       | 0.9920   | 0.01         |
|                        | (0.0333)     | (0.0891) |              |
|                        | 0.2907       | 0.7970   | 0.1          |
|                        | (0.0316)     | (0.4024) |              |
|                        | 0.1890       | 0.4420   | 0.25         |
|                        | (0.0294)     | (0.4969) |              |
|                        | 0.1407       | 0.2890   | 0.5          |
|                        | (0.0265)     | (0.4535) |              |
|                        | 0.1220       | 0.2150   | 0.75         |
|                        | (0.0264)     | (0.4110) |              |
|                        | 0.1123       | 0.1870   | 1            |
|                        | (0.0253)     | (0.3901) |              |

S in the 23andMe data. Replication exercises were conducted using all SNPs with a  $P$  value less than or equal to 1, 0.0 standard deviation (in parentheses) (Panel A.1.iii). In Panel A.1.i and Panel A.1.iii, the actual and expected replication records where statistical power exceeds 80% are bolded.

Panel A but shows the actual and simulated replication record for the replication of the 23andMe and me dominance G tested SNPs will have concordant signs in the discovery and replication cohorts; test (ii) (in Panels A.2.i and B.2.i) is a bir

| <b>Panel B: 23andMe-&gt;UKB replication</b>                                             |                                                                           |                                                                         |
|-----------------------------------------------------------------------------------------|---------------------------------------------------------------------------|-------------------------------------------------------------------------|
| SNPs with $P$ value $\leq 1$<br>in the 23andMe GWAS<br>( $M = 164,761$ )                | SNPs with $P$ value $\leq 0.01$<br>in the 23andMe GWAS<br>( $M = 8,354$ ) | SNPs with $P$ value $\leq 1e-4$<br>in the 23andMe GWAS<br>( $M = 110$ ) |
| <b>Panel B.1: 23andMe-&gt;UKB replication: test (i) (the sign test)</b>                 |                                                                           |                                                                         |
| Panel B.1.i: Actual replication record                                                  |                                                                           |                                                                         |
| 0.5019<br>$P = 0.059$                                                                   | 0.4937<br>$P = 0.87$                                                      | 0.5000<br>$P = 0.46$                                                    |
| Panel B.1.ii: Statistical power of the test as a function of the assumed value of omega |                                                                           |                                                                         |
| 5.8%                                                                                    | 8.1%                                                                      | 15.8%                                                                   |
| 11.6%                                                                                   | 40.3%                                                                     | <b>94.3%</b>                                                            |
| 75.5%                                                                                   | <b>100.0%</b>                                                             | <b>99.6%</b>                                                            |
| <b>93.9%</b>                                                                            | <b>98.4%</b>                                                              | 40.0%                                                                   |
| <b>89.2%</b>                                                                            | <b>83.4%</b>                                                              | 19.5%                                                                   |
| <b>87.7%</b>                                                                            | 68.8%                                                                     | 12.1%                                                                   |
| <b>91.5%</b>                                                                            | 68.3%                                                                     | 11.4%                                                                   |
| <b>90.1%</b>                                                                            | 60.4%                                                                     | 9.3%                                                                    |
| Panel B.1.iii: Expected replication record as a function of the assumed value of omega  |                                                                           |                                                                         |
| 0.5001<br>(0.0013)                                                                      | 0.5013<br>(0.0055)                                                        | 0.5300<br>(0.0478)                                                      |
| 0.5006<br>(0.0012)                                                                      | 0.5079<br>(0.0056)                                                        | 0.6491<br>(0.0452)                                                      |
| 0.5028<br>(0.0012)                                                                      | 0.5297<br>(0.0053)                                                        | 0.6978<br>(0.0414)                                                      |
| 0.5038<br>(0.0012)                                                                      | 0.5202<br>(0.0054)                                                        | 0.5650<br>(0.0445)                                                      |
| 0.5037<br>(0.0013)                                                                      | 0.5144<br>(0.0055)                                                        | 0.5353<br>(0.0467)                                                      |
| 0.5036<br>(0.0013)                                                                      | 0.5117<br>(0.0054)                                                        | 0.5226<br>(0.0459)                                                      |
| 0.5037<br>(0.0012)                                                                      | 0.5114<br>(0.0055)                                                        | 0.5222<br>(0.0458)                                                      |
| 0.5036<br>(0.0012)                                                                      | 0.5103<br>(0.0056)                                                        | 0.5158<br>(0.0477)                                                      |
| <b>Panel B.2: 23andMe-&gt;UKB replication: test (ii)</b>                                |                                                                           |                                                                         |
| Panel B.2.i: Actual replication record                                                  |                                                                           |                                                                         |
| 0.0503<br>$P = 0.27$                                                                    | 0.0508<br>$P = 0.36$                                                      | 0.1091<br>$P = 0.003$                                                   |
| Panel B.2.ii: Statistical power of the test as a function of the assumed value of omega |                                                                           |                                                                         |
| 7.0%                                                                                    | 9.2%                                                                      | 58.1%                                                                   |
| 19.4%                                                                                   | <b>85.4%</b>                                                              | <b>100.0%</b>                                                           |
| <b>88.7%</b>                                                                            | <b>100.0%</b>                                                             | <b>100.0%</b>                                                           |
| <b>83.5%</b>                                                                            | <b>93.0%</b>                                                              | 50.5%                                                                   |
| 76.8%                                                                                   | 63.2%                                                                     | 22.9%                                                                   |
| 70.8%                                                                                   | 47.1%                                                                     | 17.0%                                                                   |

|                                                                                        |                    |                    |
|----------------------------------------------------------------------------------------|--------------------|--------------------|
| 72.3%                                                                                  | 42.5%              | 15.9%              |
| 68.0%                                                                                  | 37.4%              | 14.7%              |
| Panel B.2.iii: Expected replication record as a function of the assumed value of omega |                    |                    |
| 0.0501<br>(0.0005)                                                                     | 0.0509<br>(0.0023) | 0.0838<br>(0.0252) |
| 0.0504<br>(0.0005)                                                                     | 0.0564<br>(0.0024) | 0.1915<br>(0.0362) |
| 0.0516<br>(0.0006)                                                                     | 0.0688<br>(0.0027) | 0.2030<br>(0.0365) |
| 0.0514<br>(0.0006)                                                                     | 0.0579<br>(0.0026) | 0.0786<br>(0.0265) |
| 0.0513<br>(0.0005)                                                                     | 0.0547<br>(0.0025) | 0.0613<br>(0.0233) |
| 0.0512<br>(0.0006)                                                                     | 0.0537<br>(0.0025) | 0.0567<br>(0.0215) |
| 0.0512<br>(0.0005)                                                                     | 0.0535<br>(0.0025) | 0.0565<br>(0.0220) |
| 0.0511<br>(0.0005)                                                                     | 0.0532<br>(0.0024) | 0.0554<br>(0.0214) |

1,  $10^{-4}$ , and  $10^{-6}$  in the UKB dominance GWAS. Panel A.1 shows the actual replication record on test (i) (the sign test) and test (ii) (the binomial test). The expected replication records are expressed as the fraction of SNPs that pass the test; in Panel A.1.ii and Panel A.1.iii, statistical power and the expected replication record are expressed as the fraction of SNPs that pass the test.

iWAS in the UKB data.

Binomial test of the null hypothesis that a fraction 0.05 of the tested SNPs will have concordant signs in the discovery and replication.

---

---

---

SNPs with  $P$  value  $\leq 1e-6$   
in the 23andMe GWAS  
( $M = 3$ )

---

---

---

---

1.0000  
 $P = 0.00$

---

---

50.2%  
**83.8%**  
74.6%  
21.4%  
16.4%  
15.0%  
12.5%  
15.4%

---

---

0.8020  
(0.2225)  
0.9420  
(0.1366)  
0.9083  
(0.1645)  
0.6083  
(0.2759)  
0.5507  
(0.2871)  
0.5293  
(0.2885)  
0.5203  
(0.2803)  
0.5367  
(0.2915)

---

---

---

---

0.3333  
 $P = 0.007$

---

---

78.0%  
**90.3%**  
79.3%  
23.7%  
21.0%  
18.6%

---

17.0%  
16.0%

---

---

0.3790  
(0.2685)  
0.5287  
(0.2893)  
0.4147  
(0.2839)  
0.0880  
(0.1675)  
0.0727  
(0.1440)  
0.0660  
(0.1426)  
0.0600  
(0.1365)  
0.0543  
(0.1259)

---

---

(Panel A.1.i); the statistical power of  
pected replication record were

l replications cohorts and will have  $P$

**Supplementary Table 20. Estimates of inbreeding depression (*ID*) using LD score regression (*LDSCdom*) and summary**

|                                                           | Block Jackknife       |       |                | Intercept | Block Jackknife |                |
|-----------------------------------------------------------|-----------------------|-------|----------------|-----------|-----------------|----------------|
|                                                           | Estimate of <i>ID</i> | S.E.  | <i>P</i> value |           | S.E.            | <i>P</i> value |
| <u><i>UK Biobank:</i></u>                                 |                       |       |                |           |                 |                |
| 1KG LD scores                                             | -2.105                | 0.635 | 0.001          | -0.024    | 0.005           | 3.69E-07       |
| UKB LD scores                                             | -1.708                | 0.592 | 0.004          | -0.025    | 0.003           | 3.14E-18       |
| <u><i>23andMe:</i></u>                                    |                       |       |                |           |                 |                |
| 1KG LD scores                                             | -0.257                | 0.223 | 0.25           | -0.045    | 0.004           | 1.36E-27       |
| UKB LD scores                                             | -0.242                | 0.216 | 0.262          | -0.048    | 0.003           | 1.74E-43       |
| <u><i>Meta-analysis of UKB and 23andMe estimates:</i></u> |                       |       |                |           |                 |                |
| 1KG LD scores                                             | -0.443                | 0.213 | 0.038          | -0.052    | 0.005           | 1.27E-29       |
| UKB LD scores                                             | -0.349                | 0.205 | 0.088          | -0.056    | 0.004           | 1.01E-55       |

*Notes:* LDSCdom estimates were obtained using weighted least squares based on weights inversely proportional to LD scores. Standard errors (S.E.) of LDSC estimates were obtained using a block-jackknife procedure based on 289 blocks defined by ~10 Mb-long genomic segments. LD scores were calculated in participants from the 1,000 Genomes Project (1KG) or UK Biobank (UKB). Meta-analysis was performed using inverse-variance weighted meta-analysis. *P* values are based on a two-sided *Z* test.

7 statistics from dominance GWAS



**Supplementary Table 21. Predictive power of *EduYears* Polygenic Index in HRS and Add Hea**

| Health and Retirement Study (HRS) |       |                               |                               | Nation |
|-----------------------------------|-------|-------------------------------|-------------------------------|--------|
|                                   | N     | LDpred                        | C+T $P < 5e-8$                | N      |
| <b>AFR</b>                        | 2507  | 1.32%<br>(0.590% to 2.227%)   | 0.72%<br>(0.227% to 1.414%)   | 1716   |
| <b>EUR</b>                        | 10843 | 12.0%<br>(10,796% to 12,892%) | 7.0%<br>(6,054% to 7,873%)    | 5653   |
| <b>Relative accuracy</b>          |       | 11.04%<br>(3.780% to 18.298%) | 10.27%<br>(1.411% to 19.128%) |        |

*Notes*: All analyses include the baseline control variables: a full set of dummy variables for year of sex and year of birth, and the first 10 ancestry-specific principal components (PCs) of the variance.  $R^2$  presented in parentheses were bootstrapped with 1,000 repetitions each. The 95% CIs for the relative accuracy were constructed with using HapMap3 SNPs and a fraction of causal SNPs equal to 1. "C+T" is a threshold of 0.1 and a  $P$  value threshold of  $5e-8$  ( $P$  values are constructed using a two-sided  $Z$  test). African-genetic-ancestry sample to the prediction accuracy in the European-genetic-ancestry sample.

**With African-genetic-ancestry and European-genetic-ancestry samples**

**Final Longitudinal Study of Adolescent to Adult Health (Add Health)**

| LDpred               | C+T $P < 5e-8$      |
|----------------------|---------------------|
| 2.31%                | 1.21%               |
| (1.102% to 3.740%)   | (0.437% to 2.418%)  |
| 14.99%               | 8.95%               |
| (13.330% to 16.516%) | (7.686% to 10.315%) |
| 15.41%               | 13.52%              |
| (5.778% to 25.043%)  | (1.833% to 25.206%) |

of birth, an indicator variable for sex, a full set of interactions between the genetic data. The 95% CIs for incremental relative accuracies were obtained using the delta method. LDpred PGIs were made with a clumping  $r^2$  threshold. C+T PGIs were made with a clumping  $r^2$  threshold. "Relative accuracy" is the ratio of the prediction accuracy in the

**Supplementary Table 22. Discovery GWAS summary statistics used to construct polygenic**

| Phenotype of discovery GWAS summary statistics | Target disease phenotypes in UK Biobank          |
|------------------------------------------------|--------------------------------------------------|
| <u>Cardiometaabolic diseases:</u>              |                                                  |
| Systolic blood pressure                        | Essential (primary) hypertension                 |
| Coronary artery disease                        | Ischaemic heart disease<br>Myocardial infarction |
| Low-density lipoprotein cholesterol            | Pure hypercholesterolaemia                       |
| Type 2 diabetes                                | Type 2 diabetes                                  |
| <u>Lung diseases:</u>                          |                                                  |
| Asthma                                         | Asthma                                           |
| <u>Musculoskeletal diseases:</u>               |                                                  |
| Femoral neck bone mineral density              | Osteoporosis                                     |
| Rheumatoid arthritis                           | Rheumatoid arthritis                             |
| <u>Neurological diseases:</u>                  |                                                  |
| Migraine                                       | Migraine                                         |
| <u>Psychiatric disorders:</u>                  |                                                  |
| Major depression                               | Major depression                                 |

**ic indices of 9 diseases for UK Biobank participants, for the prediction of disease risk from PGI**

| Source for the summary statistics used to construct the PGI                                                                                                                                                   |                                                                                                                                                                                                               |
|---------------------------------------------------------------------------------------------------------------------------------------------------------------------------------------------------------------|---------------------------------------------------------------------------------------------------------------------------------------------------------------------------------------------------------------|
| Reference for the paper reporting the GWAS                                                                                                                                                                    | Website                                                                                                                                                                                                       |
| Wain, L. V <i>et al.</i> Novel Blood Pressure Locus and Gene Discovery Using Genome-Wide Association Study and Expression Data Sets From Blood and the Kidney. <i>Hypertension</i> <b>70</b> , e4–e19 (2017). | -                                                                                                                                                                                                             |
| Nikpay, M. <i>et al.</i> A comprehensive 1000 Genomes–based genome-wide association meta-analysis of coronary artery disease. <i>Nat Genet.</i> <b>47</b> , 1121–1130 (2015).                                 | Downloaded from <a href="http://cardiogramplusc4d.org/data-downloads">http://cardiogramplusc4d.org/data-downloads</a>                                                                                         |
| Willer, C. J. <i>et al.</i> Discovery and refinement of loci associated with lipid levels. <i>Nat Genet.</i> <b>45</b> , 1274–1283 (2013).                                                                    | Downloaded from <a href="http://csg.sph.umich.edu//abecasis/public/lipids2013/">http://csg.sph.umich.edu//abecasis/public/lipids2013/</a>                                                                     |
| Morris, A. P. <i>et al.</i> Large-scale association analysis provides insights into the genetic architecture and pathophysiology of type 2 diabetes. <i>Nat Genet.</i> <b>44</b> , 981–990 (2012).            | Downloaded from <a href="http://diagram-consortium.org/downloads.html">http://diagram-consortium.org/downloads.html</a>                                                                                       |
| Demenaïs, F. <i>et al.</i> Multiancestry association study identifies new asthma risk loci that colocalize with immune-cell enhancer marks. <i>Nat Genet.</i> <b>50</b> , 42–53 (2018).                       | Downloaded from <a href="ftp://ftp.ebi.ac.uk/pub/databases/gwas/summary_statistics/DemenaïsF_29273806_GCST005212">ftp://ftp.ebi.ac.uk/pub/databases/gwas/summary_statistics/DemenaïsF_29273806_GCST005212</a> |
| Zheng, H. <i>et al.</i> Whole-genome sequencing identifies EN1 as a determinant of bone density and fracture. <i>Nature</i> <b>526</b> , 112–117 (2015).                                                      | Downloaded from <a href="http://www.gefos.org/?q=content/data-release-2015">http://www.gefos.org/?q=content/data-release-2015</a>                                                                             |
| Okada, Y. <i>et al.</i> Genetics of rheumatoid arthritis contributes to biology and drug discovery. <i>Nature</i> <b>506</b> , 376–381 (2014).                                                                | Downloaded from <a href="http://plaza.umin.ac.jp/~yokada/datasource/software.htm">http://plaza.umin.ac.jp/~yokada/datasource/software.htm</a>                                                                 |
| Gormley, P. <i>et al.</i> Meta-analysis of 375,000 individuals identifies 38 susceptibility loci for migraine. <i>Nat Genet.</i> <b>48</b> , 856–866 (2016).                                                  | Downloaded from <a href="http://www.headachegenetics.org/content/datasets-and-cohorts">http://www.headachegenetics.org/content/datasets-and-cohorts</a>                                                       |
| Wray, N. R. <i>et al.</i> Genome-wide association analyses identify 44 risk variants and refine the genetic architecture of major depression. <i>Nat Genet.</i> <b>50</b> , 668–681 (2018).                   | -                                                                                                                                                                                                             |

| File name                                                      | Note                                                                |
|----------------------------------------------------------------|---------------------------------------------------------------------|
| SBP_summary_meta_ALL_June2015_FILTERED_NEFF60MAF1pc_rsid.RData | -                                                                   |
| cad.additive.Oct2015.pub.zip                                   | -                                                                   |
| Mc_LDL.txt.gz                                                  | -                                                                   |
| Stage 1 GWAS: Summary Statistics                               | -                                                                   |
| TAGC_meta-analyses_results_for_asthma_risk.zip                 | Summary statistics from random model of European ancestry were used |
| fn2stu.MAF0_.005.pos_.out_.gz                                  | -                                                                   |
| RA_GWASmeta_European_v2.txt.gz                                 | -                                                                   |
| any_mig.gwama_.out_.isq75.nstud12.cleanean_.p1e-5_3.txt        | Only SNPs with association P value < 1.0E-5 are provided            |
| MDD_FullMeta_noUKBB_PGC_2017.gz                                | The GWAS are based on cohort excluding UK Biobank cohort            |



==

==

—

==

==

==

==

—

==

==



**Supplementary Table 23. Definition of the disease variables, for the prediction of disease risk from PGI**

| Original disease name            | Description                                                                                                                                                                                                                                                                                                                                                                                                                                                                                                                                                                                                 | Data field <sup>†</sup>                        |
|----------------------------------|-------------------------------------------------------------------------------------------------------------------------------------------------------------------------------------------------------------------------------------------------------------------------------------------------------------------------------------------------------------------------------------------------------------------------------------------------------------------------------------------------------------------------------------------------------------------------------------------------------------|------------------------------------------------|
| <i>Cardiometabolic diseases:</i> |                                                                                                                                                                                                                                                                                                                                                                                                                                                                                                                                                                                                             |                                                |
| Essential (primary) hypertension | UKB participants with primary care, hospital admission or death registry record that could be mapped to I10 (Essential (primary) hypertension) were assigned as cases. For the remaining participants, individuals with other hypertensive diseases (I11-I15, hypertensive heart disease, hypertensive renal disease or both and secondary hypertension) were first removed and the rest participants were assigned as controls.                                                                                                                                                                            | 131287                                         |
| Ischaemic heart disease          | UKB participants with primary care, hospital admission or death registry record that could be mapped to I20-I25 (angina pectoris, acute and subsequent myocardial infarction, certain current complications after acute myocardial infarction, other acute ischaemic heart disease and chronic ischaemic heart disease) were assigned as cases. The remaining individuals were assigned as controls.                                                                                                                                                                                                        | 131297, 131299, 131301, 131303, 131305, 131307 |
| Myocardial infarction            | UKB participants with primary care, hospital admission or death registry record that could be mapped to I21-I23 (acute and subsequent myocardial infarction, certain current complications after acute myocardial infarction and participants with hospital admission record I252 (Old myocardial infarction) were assigned as cases. For the remaining participants, individuals with diagnoses record belongings to anginal pectoris (I20), other acute ischaemic heart diseases (I24) and chronic ischaemic heart diseases (I25) were first removed and the rest participants were assigned as controls. | 131299, 131301, 131303<br>.....<br>41270       |
| Pure hypercholesterolaemia       | UKB participants with hospital admission record E780 (pure hypercholesterolaemia) were assigned as cases. For the remaining participants, individuals with diagnoses record that could be mapped to E78 (disorders of lipoprotein metabolism and other lipidaemias) were first removed and the rest were assigned as controls.                                                                                                                                                                                                                                                                              | 41270                                          |
| Type 2 diabetes                  | UKB participants with primary care, hospital admission or death registry record that could be mapped to E11 (non-insulin-dependent diabetes mellitus) were assigned as cases. For the remaining participants, individuals with E10, E12-E14 (insulin-dependent diabetes mellitus, malnutrition-related diabetes mellitus, other specified diabetes mellitus and unspecified diabetes mellitus) were removed and the rest participants were assigned as controls.                                                                                                                                            | 130709                                         |
| <i>Lung diseases:</i>            |                                                                                                                                                                                                                                                                                                                                                                                                                                                                                                                                                                                                             |                                                |

|                                  |                                                                                                                                                                                                                                                                                                                                                                                                                                                                        |                        |
|----------------------------------|------------------------------------------------------------------------------------------------------------------------------------------------------------------------------------------------------------------------------------------------------------------------------------------------------------------------------------------------------------------------------------------------------------------------------------------------------------------------|------------------------|
| Asthma                           | UKB participants with primary care, hospital admission or death registry record that could be mapped to J45 and J46 (asthma and status asthmaticus) were assigned as cases. The remaining individuals were assigned as controls.                                                                                                                                                                                                                                       | 131495, 131497         |
| <i>Musculoskeletal diseases:</i> |                                                                                                                                                                                                                                                                                                                                                                                                                                                                        |                        |
| Osteoporosis                     | UKB participants with primary care, hospital admission or death registry records that could be mapped to ICD10 code M80-M82 (osteoporosis with or without pathological fracture and osteoporosis in diseases classified elsewhere) were assigned as cases. For the remaining participants, individuals with diagnoses record belonging to other bone density and structure disorders (M83-M85) were first removed and the rest participants were assigned as controls. | 131963, 131965, 131967 |
| Rheumatoid arthritis             | UKB participants with primary care, hospital admission or death registry records that could be mapped to ICD10 code M05 and M06 (seropositive rheumatoid arthritis and other rheumatoid arthritis) were assigned as cases. For the remaining participants, individuals with diagnoses record belonging to inflammatory polyarthropathies (M07-M14) were first removed and the rest participants were assigned as controls.                                             | 131849, 131851         |
| <i>Neurological diseases:</i>    |                                                                                                                                                                                                                                                                                                                                                                                                                                                                        |                        |
| Migraine                         | UKB participants with primary care, hospital admission or death registry records that could be mapped to ICD10 code G43 (migraine) were assigned as cases. For the remaining participants, individuals with diagnoses record belonging to other headache syndromes (G44) were first removed and the rest participants were assigned as controls.                                                                                                                       | 131053                 |
| <i>Psychiatric disorders:</i>    |                                                                                                                                                                                                                                                                                                                                                                                                                                                                        |                        |
| Major depression                 | UKB participants with primary care, hospital admission or death registry record that could be mapped to F32 and F33 (depressive episode and recurrent depressive episode) were assigned as cases. For the remaining participants, individuals with diagnoses record belonging to other mood (affective) disorders (F30, F31, F34, F38-F39) were first removed and the rest participants were assigned as controls.                                                     | 130895, 130897         |

*Notes:* This table provides details on the definition and coding of the disease phenotypes used for the prediction of disease risk fr

<sup>†</sup> Numbers (separated with comma if applicable) in the 'Data field' columns represent the corresponding UK Biobank (UKB) data

<sup>\*</sup> Numbers in the 'Data coding' columns represent the corresponding UKB data coding system for the UKB data fields listed in the

<sup>§</sup> Numbers separated with comma in the column represent the coding of the corresponding coding system. For each UKB data fi coding values for data coding 2171 are: 20 (death register only); 21 (death register and other source(s)); 30 (primary care only) system is used for ICD10 (WHO International Classification of Diseases) and the coding values listed in the table are: E780 (Pure

<sup>#</sup> For each data field in the 'Case definition' section of the table, UKB participants whose data coding took a value listed in the 'D whose data coding took a value listed in the 'Data coding value excluded' column in the 'Control screening' section were removed, ;

| Case definition          |                                         |                                         |                                                               |                                                                                                                                                                   |
|--------------------------|-----------------------------------------|-----------------------------------------|---------------------------------------------------------------|-------------------------------------------------------------------------------------------------------------------------------------------------------------------|
| Data coding <sup>‡</sup> | Data coding value included <sup>§</sup> | Data coding value excluded <sup>§</sup> | Case definition justification from published study (PMID No.) | Note                                                                                                                                                              |
| 2171                     | 20, 21, 30, 31, 40, 41, 51              | 50                                      | 28122885                                                      | -                                                                                                                                                                 |
| 2171                     | 20, 21, 30, 31, 40, 41, 51              | 50                                      | 27006480                                                      | -                                                                                                                                                                 |
| 2171                     | 20, 21, 30, 31, 40, 41, 51              | 50                                      | 30404896                                                      | Individuals with diagnoses record of I241 (Dressler's syndrome) were removed at control screening step due to lack of specificity compared with I21-I23 and I252. |
| 19                       | I252                                    | -                                       |                                                               |                                                                                                                                                                   |
| 19                       | E780                                    | -                                       | 31553307                                                      | -                                                                                                                                                                 |
| 2171                     | 20, 21, 30, 31, 40, 41, 51              | 50                                      | 32541925                                                      | -                                                                                                                                                                 |

|      |                               |    |          |                                                                                                                                                                                                                                                                  |
|------|-------------------------------|----|----------|------------------------------------------------------------------------------------------------------------------------------------------------------------------------------------------------------------------------------------------------------------------|
| 2171 | 20, 21, 30, 31,<br>40, 41, 51 | 50 | 32792435 | -                                                                                                                                                                                                                                                                |
| 2171 | 20, 21, 30, 31,<br>40, 41, 51 | 50 | 33317231 | -                                                                                                                                                                                                                                                                |
| 2171 | 20, 21, 30, 31,<br>40, 41, 51 | 50 | 33059732 | -                                                                                                                                                                                                                                                                |
| 2171 | 20, 21, 30, 31,<br>40, 41, 51 | 50 | 30974953 | -                                                                                                                                                                                                                                                                |
| 2171 | 20, 21, 30, 31,<br>40, 41, 51 | 50 | 25322690 | Individuals with diagnoses record of F34 (persistent mood disorders), F38 (other mood disorders) and F39 (unspecified mood disorders) were removed at control screening step due to lack of specificity compared with F32 and F33 rather than assigned as cases. |

om PGI.

fields.

nearest 'Data field' column. Note that different UKB data fields may have adopted the same data coding system when the data field, UKB participants were assigned a value from the adopted data coding system according to their recorded information for: 31 (primary care and other source(s)); 40 (hospital admissions data only); 41 (hospital admission data and other source(s)); I251 (Atherosclerotic heart disease); and I252 (Old myocardial infarction).

data coding value included' column were classified as cases, while those whose data coding took a value listed in the 'Data code' and the remaining participants were assigned as control status. The data for data fields in this table were downloaded in Dec 20

| Control screening                 |                          |                                         |                                     |
|-----------------------------------|--------------------------|-----------------------------------------|-------------------------------------|
| Data field <sup>†</sup>           | Data coding <sup>‡</sup> | Data coding value excluded <sup>§</sup> | Number of case/control <sup>#</sup> |
| 131289, 131291,<br>131293, 131295 | 2171                     | 20, 21, 30, 31,<br>40, 41, 50, 51       | 108,371/332,364                     |
| -                                 | -                        | -                                       | 39,852/399,472                      |
| 131297, 131305,<br>131307         | 2171                     | 20, 21, 30, 31,<br>40, 41, 50, 51       | 15,986/399,472                      |
| 130815                            | 2171                     | 20, 21, 30, 31,<br>40, 41, 50, 51       | 42,475/279,615                      |
| 130707, 130711,<br>130713, 130715 | 2171                     | 20, 21, 30, 31,<br>40, 41, 50, 51       | 25,880/410,247                      |

|                                                                 |      |                                   |                |
|-----------------------------------------------------------------|------|-----------------------------------|----------------|
| -                                                               | -    | -                                 | 37,790/382,895 |
| 131969, 131971,<br>131973                                       | 2171 | 20, 21, 30, 31,<br>40, 41, 50, 51 | 12,388/414,970 |
| 131853, 131855,<br>131859, 131861,<br>131863, 131865,<br>131867 | 2171 | 20, 21, 30, 31,<br>40, 41, 50, 51 | 6,434/394,453  |
| 131055                                                          | 2171 | 20, 21, 30, 31,<br>40, 41, 50, 51 | 10,219/416,379 |
| 130891, 130893,<br>130899, 130901,<br>130903                    | 2171 | 20, 21, 30, 31,<br>40, 41, 50, 51 | 29,904/393,240 |

1 fields are similar.

or the corresponding data field. There are two data coding system: 2171 and 19. The ); 50 (self-report only); and 51 (self-report and other source(s)). The data coding 19

ing value excluded' column were removed. For the remaining participants, individuals 019 from UK Biobank after application approval.

**Supplementary Table 24. Results from bivariate LD score regression analysis between discovery GWAS summary statistics**

| Trait of discovery GWAS summary statistics | Disease of target GWAS summary statistics in UK Biobank <sup>*</sup> | Result |               |
|--------------------------------------------|----------------------------------------------------------------------|--------|---------------|
|                                            |                                                                      | $r_g$  | S.E.( $r_g$ ) |
| <u>Cardiometabolic diseases:</u>           |                                                                      |        |               |
| Systolic blood pressure                    | Essential (primary) hypertension                                     | 0.79   | 0.022         |
| Coronary artery disease                    | Ischaemic heart disease                                              | 0.92   | 0.029         |
| Low-density lipoprotein cholesterol        | Pure hypercholesterolaemia                                           | 0.51   | 0.065         |
| Type 2 diabetes                            | Type 2 diabetes                                                      | 0.98   | 0.046         |
| <u>Lung diseases:</u>                      |                                                                      |        |               |
| Asthma                                     | Asthma                                                               | 0.85   | 0.042         |
| <u>Musculoskeletal diseases:</u>           |                                                                      |        |               |
| Femoral neck bone mineral density          | Osteoporosis                                                         | -0.71  | 0.097         |
| Rheumatoid arthritis                       | Rheumatoid arthritis                                                 | 0.76   | 0.078         |
| <u>Psychiatric disorders:</u>              |                                                                      |        |               |
| Major depression                           | Major depression                                                     | 0.76   | 0.031         |

Notes : LD score regression analysis was not conducted for migraine because GWAS summary statistics were only available for

<sup>\*</sup> GWAS of the 8 UKB diseases phenotypes were conducted using BOLT-LMM, fitting sex, age and 20 PCs as covariates. GWAS the UK Biobank for each disease are shown in the last column of Supplementary Table 23.

<sup>†</sup> Bivariate LD score intercept and standard error. In bivariate LDSC, the sample overlap impacts the bivariate LDSC intercept, v the bivariate LDSC analysis.

<sup>\*</sup> Observed scale SNP-based heritability, corresponding standard error, single-trait LD score regression intercept, and correspond

tics used to construct the disease PGI and corresponding UKB GWAS summary statistics, for the prediction of disease risk

| s from bivariate LD score regression analysis |          |                                           |                                                | statistics              |                              |                                 |
|-----------------------------------------------|----------|-------------------------------------------|------------------------------------------------|-------------------------|------------------------------|---------------------------------|
| $Z$                                           | $P$      | Bivariate LD score intercept <sup>†</sup> | Bivariate LD score intercept S.E. <sup>†</sup> | LDSC $h^2$ <sup>‡</sup> | LDSC $h^2$ S.E. <sup>‡</sup> | LD score intercept <sup>‡</sup> |
| 36.06                                         | 9.3E-285 | 0.03                                      | 0.011                                          | 0.09                    | 0.004                        | 1.08                            |
| 31.90                                         | 2.3E-223 | 0.02                                      | 0.008                                          | 0.04                    | 0.003                        | 1.03                            |
| 7.88                                          | 3.3E-15  | 0.05                                      | 0.036                                          | 0.05                    | 0.005                        | 1.06                            |
| 21.20                                         | 9.5E-100 | 0.02                                      | 0.008                                          | 0.05                    | 0.003                        | 1.07                            |
| 20.32                                         | 8.5E-92  | 0.01                                      | 0.010                                          | 0.05                    | 0.004                        | 1.02                            |
| -7.35                                         | 1.9E-13  | -0.01                                     | 0.007                                          | 0.01                    | 0.002                        | 1.03                            |
| 9.82                                          | 9.5E-23  | 0.01                                      | 0.007                                          | 0.01                    | 0.002                        | 1.01                            |
| 24.25                                         | 6.4E-130 | 0.01                                      | 0.006                                          | 0.02                    | 0.002                        | 1.01                            |

SNPs with association  $P$  value  $< 10^{-5}$ .  $Z$  scores were constructed using a two sided test and the  $P$  values are based on the  $Z$ -score of myocardial infarction was not conducted because this phenotype is a subset of ischaemic heart disease. The numbers of cases

whose expected value is the phenotypic correlation multiplied by the proportion of shared individuals between two GWAS datasets

ing standard error, for UKB GWAS summary statistics.



from PGI

---

| LDSC intercept    |
|-------------------|
| S.E. <sup>‡</sup> |
| 0.017             |
| 0.011             |
| 0.026             |
| 0.015             |
| 0.016             |
| 0.010             |
| 0.007             |
| 0.007             |

---

s.

and controls in

contributing to

**Supplementary Table 25. Comparison of COJO and clumping lead SNP definitions - Incremental  $R^2$**

|                                                             |                                         | HRS   |
|-------------------------------------------------------------|-----------------------------------------|-------|
|                                                             | Controls                                | 6.64% |
| COJO PGI (COJO effect sizes)                                | Controls + C+T PGI ( $P < 5e-8$ )       | 0.74% |
|                                                             | Controls + C+T PGI ( $P < 4.61e-9$ )    | 1.07% |
|                                                             | Controls                                | 6.84% |
| COJO PGI (GWAS effect sizes)                                | Controls + C+T PGI ( $P < 5e-8$ )       | 0.69% |
|                                                             | Controls + C+T PGI ( $P < 4.61e-9$ )    | 1.03% |
|                                                             | Controls                                | 6.98% |
| C+T PGI ( $P < 5e-8$ )                                      | Controls + COJO PGI (COJO effect sizes) | 1.08% |
|                                                             | Controls + COJO PGI (GWAS effect sizes) | 0.83% |
|                                                             | Controls                                | 6.31% |
| C+T PGI ( $P < 4.61e-9$ )                                   | Controls + COJO PGI (COJO effect sizes) | 0.74% |
|                                                             | Controls + COJO PGI (GWAS effect sizes) | 0.50% |
| COJO PGI (COJO effect sizes)<br>+ C+T PGI ( $P < 5e-8$ )    | Controls                                | 7.72% |
|                                                             |                                         |       |
| COJO PGI - GWAS effect sizes<br>+ C+T PGI ( $P < 5e-8$ )    | Controls                                | 7.67% |
|                                                             |                                         |       |
| COJO PGI (COJO effect sizes)<br>+ C+T PGI ( $P < 4.61e-9$ ) | Controls                                | 7.38% |
|                                                             |                                         |       |
| COJO PGI - GWAS effect sizes<br>+ C+T PGI ( $P < 4.61e-9$ ) | Controls                                | 7.34% |

Notes: Columns C and D report the the difference in  $R^2$  when the PGI(s) in Column A is/are added to a regression of  $Education$  covariates in Column B. "Controls" are a full set of dummy variables for year of birth, an indicator variable for sex, interactions between sex and year of birth, and the first 10 principal components (PCs) of the variance-covariance matrix of the data. COJO PGIs were made using the 2,942 lead SNPs ( $P < 5e-8$ ) obtained by applying the COJO algorithm to the data. Supplementary Note section 2.2.7 to a meta-analysis that excludes HRS,  $P$  values are constructed using a two sided Z-test and WLS. C+T PGIs were made using the 3,878 and 2,942 lead SNPs ( $P < 5e-8$  and  $P < 4.61e-9$ , respectively) obtained by clumping algorithm described in Supplementary Note section 2.2.6 to the same meta-analysis. For the first COJO PGI in column C SNP weights were set to the posterior effect sizes estimated by COJO. For the second COJO PGI and the C+T PGIs, we

**Add Health**

9.99%

1.66%

2.20%

9.81%

1.35%

1.86%

9.18%

0.85%

0.72%

8.35%

0.55%

0.41%

10.84%

10.53%

10.55%

**10.21%**

*t*Years on the  
a full set of  
of the genetic  
described in  
t. Add Health  
r applying the  
:olumn A, the  
ights were

**Supplementary Table 26. Comparison of COJO and clumping lead SNP definitions - Regression coefficients**

|                              | HRS ( <i>N</i> =10,843) |                  |                  |                  | Add Health ( <i>N</i> =5,653) |                  |                  |
|------------------------------|-------------------------|------------------|------------------|------------------|-------------------------------|------------------|------------------|
|                              | (1)                     | (2)              | (3)              | (4)              | (1)                           | (2)              | (3)              |
| COJO PGI (COJO effect sizes) | 0.440<br>(0.046)        | 0.520<br>(0.045) |                  |                  | 0.652<br>(0.062)              | 0.732<br>(0.060) |                  |
| COJO PGI (GWAS effect sizes) |                         |                  | 0.457<br>(0.049) | 0.552<br>(0.048) |                               |                  | 0.630<br>(0.066) |
| C+T PGI ( <i>P</i> <5e-8)    | 0.531<br>(0.046)        |                  | 0.502<br>(0.049) |                  | 0.465<br>(0.062)              |                  | 0.461<br>(0.066) |
| C+T PGI ( <i>P</i> <4.61e-9) |                         | 0.431<br>(0.045) |                  | 0.385<br>(0.049) |                               | 0.367<br>(0.060) |                  |

*Notes:* Each column reports estimated regression coefficients, with standard errors in parentheses. All regressions include the control variables: a full set of dummy variables for year of birth, an indicator variable for sex, a full set of interactions between sex and year of birth, and the first 10 principal components (PCs) of the variance-covariance matrix of the genetic data (coefficients not reported). PGI sizes were made using the 2,942 lead SNPs (*P*<5e-8) obtained by applying the COJO algorithm described in Supplementary Note 2.2.7 to a meta-analysis that excludes HRS, Add Health and WLS. C+T PGIs were made using the 3,878 and 2,942 lead SNPs (*P*<5e-8 and *P*<4.61e-9, respectively) obtained by applying the clumping algorithm described in Supplementary Note section 2.2.6 to the meta-analysis. For the first COJO PGI in the table, the SNP weights were set to the posterior effect sizes estimated by COJO. For the second COJO PGI and the C+T PGIs, weights were set to the coefficient estimates from the meta-analysis. *P* values are constructed from two-sided *Z* tests.

(4)

0.729  
(0.065)

0.341  
(0.065)

baseline  
and year  
) . COJO  
≥ section  
( $P < 5e-8$   
he same  
For the  
ed using

**Supplementary Table 27. Association results for the 57 X chromosome SNPs that reached genome-wide significant**

| SNP         | BP          | Effect allele | Other allele | Effect allele frequency | Effect Size | S.E.   | <i>P value</i> |
|-------------|-------------|---------------|--------------|-------------------------|-------------|--------|----------------|
| rs3126259   | 55,574,773  | T             | G            | 0.6969                  | 0.0131      | 0.0010 | 7.63E-39       |
| rs6624382   | 68,354,952  | T             | C            | 0.7983                  | 0.0126      | 0.0011 | 3.42E-28       |
| rs5927231   | 34,156,266  | T             | G            | 0.529                   | -0.0089     | 0.0009 | 4.99E-22       |
| rs62599022  | 131,890,506 | T             | C            | 0.5052                  | -0.0086     | 0.0009 | 1.17E-20       |
| rs6647664   | 74,435,261  | T             | C            | 0.0628                  | 0.0158      | 0.0019 | 1.10E-16       |
| rs2361480   | 51,535,795  | C             | G            | 0.8661                  | 0.0112      | 0.0014 | 1.12E-16       |
| rs2156987   | 21,757,216  | C             | G            | 0.5245                  | -0.0074     | 0.0009 | 1.35E-15       |
| rs7058366   | 130,437,766 | A             | G            | 0.8781                  | 0.0112      | 0.0014 | 1.47E-15       |
| rs6621822   | 103,659,647 | A             | G            | 0.4683                  | 0.0073      | 0.0009 | 1.88E-15       |
| rs5922073   | 83,914,608  | T             | C            | 0.6399                  | -0.0076     | 0.0010 | 2.37E-15       |
| rs7886206   | 12,240,100  | T             | C            | 0.4623                  | 0.0072      | 0.0009 | 5.43E-15       |
| rs6616712   | 80,149,395  | A             | T            | 0.3398                  | 0.0076      | 0.0010 | 5.76E-15       |
| rs5986717   | 25,040,118  | A             | G            | 0.9204                  | 0.0132      | 0.0017 | 7.52E-15       |
| rs6638417   | 53,709,964  | A             | G            | 0.4719                  | 0.0069      | 0.0009 | 1.14E-13       |
| rs5936117   | 7,835,240   | T             | C            | 0.7357                  | -0.0078     | 0.0010 | 1.15E-13       |
| rs6608245   | 120,587,609 | T             | C            | 0.3634                  | 0.0071      | 0.0010 | 1.22E-13       |
| rs5905450   | 45,200,978  | A             | C            | 0.4758                  | -0.0066     | 0.0009 | 7.32E-13       |
| rs12841490  | 83,489,753  | T             | G            | 0.159                   | 0.0090      | 0.0013 | 1.15E-12       |
| rs5970304   | 151,594,821 | T             | C            | 0.6351                  | 0.0067      | 0.0010 | 1.84E-12       |
| rs77036718  | 133,287,319 | A             | G            | 0.6709                  | -0.0068     | 0.0010 | 5.81E-12       |
| rs5926235   | 23,173,719  | T             | C            | 0.2473                  | -0.0073     | 0.0011 | 1.01E-11       |
| rs6615900   | 96,490,758  | A             | T            | 0.625                   | -0.0064     | 0.0010 | 1.60E-11       |
| rs3109856   | 35,080,078  | T             | C            | 0.2951                  | -0.0068     | 0.0010 | 2.33E-11       |
| rs73203336  | 21,489,459  | T             | C            | 0.0603                  | 0.0129      | 0.0019 | 2.50E-11       |
| rs2255067   | 41,599,015  | T             | G            | 0.7673                  | -0.0072     | 0.0011 | 4.33E-11       |
| rs5936660   | 68,377,937  | A             | G            | 0.3514                  | 0.0063      | 0.0010 | 6.16E-11       |
| rs1234509   | 28,259,910  | A             | G            | 0.1713                  | 0.0080      | 0.0012 | 6.62E-11       |
| rs5951278   | 100,895,499 | A             | G            | 0.5081                  | 0.0060      | 0.0009 | 9.23E-11       |
| rs516829    | 137,994,951 | T             | C            | 0.6962                  | 0.0064      | 0.0010 | 1.44E-10       |
| rs2238944   | 18,780,943  | C             | G            | 0.5688                  | 0.0059      | 0.0009 | 1.86E-10       |
| rs7060959   | 123,017,252 | A             | T            | 0.1891                  | -0.0074     | 0.0012 | 3.35E-10       |
| rs11093451  | 73,656,415  | T             | C            | 0.7598                  | -0.0068     | 0.0011 | 3.84E-10       |
| rs5917801   | 39,251,030  | T             | G            | 0.5441                  | 0.0058      | 0.0009 | 4.31E-10       |
| rs5943820   | 25,953,098  | A             | G            | 0.5075                  | 0.0056      | 0.0009 | 9.51E-10       |
| rs1592166   | 93,332,464  | A             | C            | 0.7477                  | 0.0064      | 0.0011 | 1.28E-09       |
| rs5933105   | 131,301,492 | A             | C            | 0.1048                  | 0.0091      | 0.0015 | 1.53E-09       |
| rs5936664   | 68,406,830  | T             | C            | 0.2963                  | -0.0060     | 0.0010 | 2.53E-09       |
| rs1613059   | 117,450,519 | T             | C            | 0.2124                  | -0.0066     | 0.0011 | 3.76E-09       |
| rs5944014   | 25,233,983  | C             | G            | 0.3597                  | -0.0056     | 0.0010 | 4.16E-09       |
| rs12008840  | 42,597,501  | C             | G            | 0.8541                  | 0.0076      | 0.0013 | 4.96E-09       |
| rs3005633   | 34,000,906  | A             | T            | 0.6107                  | 0.0055      | 0.0009 | 5.74E-09       |
| rs142231508 | 21,927,329  | A             | G            | 0.0427                  | 0.0132      | 0.0023 | 6.27E-09       |
| rs2366511   | 137,048,549 | T             | G            | 0.2741                  | -0.0060     | 0.0010 | 8.00E-09       |
| rs5972486   | 29,633,695  | A             | G            | 0.6199                  | 0.0055      | 0.0009 | 9.25E-09       |
| rs12400475  | 41,108,361  | C             | G            | 0.3258                  | 0.0056      | 0.0010 | 9.76E-09       |
| rs241088    | 147,805,128 | T             | C            | 0.8294                  | 0.0070      | 0.0012 | 1.15E-08       |
| rs5930403   | 129,490,527 | A             | G            | 0.4472                  | -0.0053     | 0.0009 | 1.30E-08       |

|             |             |   |   |        |         |        |          |
|-------------|-------------|---|---|--------|---------|--------|----------|
| rs137878609 | 135,358,203 | T | C | 0.082  | -0.0095 | 0.0017 | 1.36E-08 |
| rs146852038 | 129,118,809 | A | G | 0.1388 | 0.0075  | 0.0013 | 1.62E-08 |
| rs12557277  | 50,188,292  | A | G | 0.3118 | 0.0056  | 0.0010 | 2.32E-08 |
| rs1361627   | 121,995,717 | A | G | 0.7372 | 0.0058  | 0.0010 | 3.37E-08 |
| rs7882480   | 119,389,966 | T | C | 0.708  | 0.0056  | 0.0010 | 3.48E-08 |
| rs941202    | 11,893,394  | A | G | 0.6135 | 0.0052  | 0.0009 | 3.95E-08 |
| rs7066035   | 82,782,466  | T | C | 0.3534 | -0.0053 | 0.0010 | 3.99E-08 |
| rs55850908  | 53,081,414  | A | G | 0.188  | 0.0065  | 0.0012 | 4.25E-08 |
| rs2497525   | 113,995,824 | T | C | 0.8473 | 0.0070  | 0.0013 | 4.52E-08 |
| rs209994    | 129,227,453 | A | C | 0.5763 | 0.0051  | 0.0009 | 4.91E-08 |

Notes: Clumping of GWAS results was performed as described in the Supplementary Section 3.4. SNPs are ordered by human genome build 37 (hg19). Standard errors (S.E.) and *P* values are derived from two tailed *Z* tests that have been from the main autosomal analysis. The analysis is based on 211,581 SNPs. "UKB DAF" is the effect allele frequency dif

ice in the meta-analysis of 23andMe and UKB

| Hetero $I^2$ | Hetero $P$ | $N$       | UKB DAF |
|--------------|------------|-----------|---------|
| 89.6         | 1.90E-03   | 2,713,033 | 0.0048  |
| 10.3         | 2.91E-01   | 2,713,033 | -0.0042 |
| 58.5         | 1.21E-01   | 2,713,033 | -0.0015 |
| 0            | 4.54E-01   | 2,713,033 | 0.0020  |
| 5.9          | 3.03E-01   | 2,713,033 | 0.0007  |
| 61.1         | 1.09E-01   | 2,713,033 | -0.0015 |
| 69.9         | 6.83E-02   | 2,713,033 | -0.0025 |
| 0            | 7.18E-01   | 2,713,033 | 0.0000  |
| 0            | 6.61E-01   | 2,713,033 | 0.0001  |
| 0            | 4.39E-01   | 2,713,033 | -0.0016 |
| 54.1         | 1.40E-01   | 2,713,033 | -0.0028 |
| 0            | 5.20E-01   | 2,713,033 | -0.0017 |
| 3.4          | 3.09E-01   | 2,713,033 | 0.0002  |
| 65.4         | 8.91E-02   | 2,713,033 | 0.0020  |
| 0            | 9.75E-01   | 2,713,033 | -0.0007 |
| 0            | 4.30E-01   | 2,713,033 | -0.0015 |
| 0            | 3.58E-01   | 2,713,033 | 0.0031  |
| 0            | 4.49E-01   | 2,713,033 | -0.0010 |
| 19.7         | 2.65E-01   | 2,713,033 | -0.0033 |
| 55.3         | 1.35E-01   | 2,713,033 | -0.0009 |
| 73.5         | 5.23E-02   | 2,713,033 | 0.0008  |
| 84.2         | 1.19E-02   | 2,713,033 | 0.0007  |
| 0            | 6.35E-01   | 2,713,033 | 0.0013  |
| 0            | 6.24E-01   | 2,713,033 | -0.0001 |
| 0            | 5.90E-01   | 2,713,033 | -0.0017 |
| 0            | 5.60E-01   | 2,713,033 | 0.0041  |
| 0            | 8.29E-01   | 2,713,033 | 0.0005  |
| 4.3          | 3.07E-01   | 2,713,033 | 0.0023  |
| 49.9         | 1.58E-01   | 2,713,033 | -0.0031 |
| 0            | 4.89E-01   | 2,713,033 | 0.0012  |
| 74.5         | 4.78E-02   | 2,713,033 | -0.0006 |
| 0            | 8.77E-01   | 2,713,033 | 0.0028  |
| 62.3         | 1.03E-01   | 2,713,033 | 0.0010  |
| 33.8         | 2.19E-01   | 2,713,033 | -0.0012 |
| 0            | 3.45E-01   | 2,713,033 | -0.0010 |
| 0            | 3.24E-01   | 2,713,033 | -0.0019 |
| 0            | 7.43E-01   | 2,713,033 | 0.0047  |
| 3.7          | 3.08E-01   | 2,713,033 | 0.0002  |
| 21.9         | 2.58E-01   | 2,713,033 | 0.0012  |
| 66.2         | 8.54E-02   | 2,713,033 | 0.0002  |
| 0            | 8.59E-01   | 2,713,033 | 0.0014  |
| 0            | 7.07E-01   | 2,713,033 | -0.0010 |
| 0            | 7.83E-01   | 2,713,033 | -0.0018 |
| 0            | 9.79E-01   | 2,713,033 | 0.0011  |
| 16.5         | 2.74E-01   | 2,713,033 | 0.0009  |
| 49.3         | 1.60E-01   | 2,713,033 | 0.0014  |
| 0            | 4.54E-01   | 2,713,033 | 0.0011  |



|      |          |           |         |
|------|----------|-----------|---------|
| 91.2 | 7.44E-04 | 2,713,033 | 0.0010  |
| 25.3 | 2.47E-01 | 1,069,727 | -0.0009 |
| 0    | 3.75E-01 | 2,713,033 | 0.0007  |
| 0    | 8.86E-01 | 2,713,033 | 0.0012  |
| 0    | 9.17E-01 | 2,713,033 | -0.0011 |
| 45   | 1.78E-01 | 2,713,033 | 0.0007  |
| 0    | 3.76E-01 | 2,713,033 | -0.0024 |
| 0    | 6.28E-01 | 1,991,826 | -0.0013 |
| 0    | 8.75E-01 | 1,943,172 | -0.0009 |
| 0    | 7.91E-01 | 2,713,033 | -0.0014 |

---

*r* *P* value. Base pair (BP) positions are reported for  
adjusted by an estimated LDSC intercept of 1.663  
ference between males and females in UKB.

**Supplementary Table 28. Average Test Statistics By Chromosome**

| Chr | Mean $N$  | $M_{\text{eff}}$ | $M$     | Mean $\chi^2$ | #Lead SNPs | SNP $h^2$ | Chr Length | $\lambda_{GC}$ |
|-----|-----------|------------------|---------|---------------|------------|-----------|------------|----------------|
| 1   | 2,695,250 | 5,009            | 550,754 | 8.382         | 710        | 1.37%     | 248.47     | 4.913          |
| 2   | 2,700,440 | 5,116            | 604,236 | 10.158        | 1011       | 1.73%     | 243.03     | 6.138          |
| 3   | 2,701,060 | 3,927            | 514,173 | 9.303         | 688        | 1.21%     | 197.78     | 5.955          |
| 4   | 2,701,490 | 3,954            | 525,677 | 7.665         | 539        | 0.98%     | 190.85     | 5.045          |
| 5   | 2,701,490 | 3,530            | 467,600 | 7.922         | 588        | 0.90%     | 180.69     | 4.992          |
| 6   | 2,699,800 | 2,683            | 478,754 | 8.668         | 596        | 0.76%     | 170.73     | 5.432          |
| 7   | 2,696,430 | 3,436            | 420,051 | 7.781         | 498        | 0.86%     | 159.09     | 4.841          |
| 8   | 2,700,320 | 2,851            | 402,459 | 7.241         | 438        | 0.66%     | 146.14     | 4.966          |
| 9   | 2,698,100 | 3,048            | 308,977 | 7.682         | 419        | 0.75%     | 141.02     | 4.972          |
| 10  | 2,697,520 | 2,936            | 366,872 | 7.887         | 447        | 0.75%     | 135.34     | 5.045          |
| 11  | 2,691,470 | 1,525            | 359,038 | 7.309         | 434        | 0.36%     | 134.75     | 4.731          |
| 12  | 2,700,330 | 2,481            | 344,632 | 7.424         | 388        | 0.59%     | 133.65     | 4.622          |
| 13  | 2,699,450 | 2,294            | 268,100 | 8.178         | 313        | 0.61%     | 95.99      | 5.404          |
| 14  | 2,697,580 | 1,988            | 235,616 | 7.783         | 294        | 0.50%     | 88.05      | 4.873          |
| 15  | 2,691,890 | 1,991            | 201,486 | 6.892         | 240        | 0.44%     | 82.25      | 4.464          |
| 16  | 2,694,290 | 2,555            | 219,230 | 8.541         | 353        | 0.72%     | 90.07      | 5.322          |
| 17  | 2,683,910 | 1,570            | 185,948 | 13.073        | 233        | 0.71%     | 81.10      | 4.653          |
| 18  | 2,697,900 | 2,140            | 206,424 | 9.186         | 305        | 0.65%     | 77.96      | 4.660          |
| 19  | 2,687,330 | 1,453            | 154,761 | 5.091         | 151        | 0.22%     | 58.83      | 3.935          |
| 20  | 2,693,510 | 1,847            | 160,716 | 6.928         | 189        | 0.41%     | 62.86      | 4.526          |
| 21  | 2,689,190 | 1,155            | 99,104  | 5.694         | 89         | 0.20%     | 33.51      | 3.824          |
| 22  | 2,674,460 | 1,148            | 95,332  | 7.258         | 128        | 0.27%     | 34.17      | 4.457          |
| X   | 2,647,880 | 1,309            | 256,643 | 8.736         | 173        | 0.38%     | 152.22     | 5.363          |

**Notes:** All calculations are based on meta-analysis of 23andMe and UK Biobank. Mean  $N$ : average sample size for SNPs that passed sample-size filters.  $M_{\text{eff}}$ : number of effective loci.  $M$ : number of SNPs used to estimate  $M_{\text{eff}}$ . Mean  $\chi^2$ : average test statistic for SNPs with MAF > 1%. #Lead SNPs: number of approximately independent SNPs reaching  $P$  value <  $5 \times 10^{-8}$ . SNP  $h^2$ : per-chromosome heritability of SNPs with MAF > 1%. Chr Length: chromosomal length measured in MegaBase Pairs (calculated as the difference between the max and min BP on each chromosome among SNPs that survived all filters in the meta-analysis).

---

**Supplementary Table 29. Predictive power of *EduYears* PGIs made using different EA GWAS**

---

|                               | GWAS <i>N</i> | Incremental- $R^2$ - Add Health | Incremental- $R^2$ - HRS |
|-------------------------------|---------------|---------------------------------|--------------------------|
| Rietveld et al. (2013)        | 117,922       | 2.82%                           | 2.55%                    |
| Okbay et al. (2016) Discovery | 283,761       | 5.97%                           | 5.73%                    |
| Okbay et al. (2016) Combined  | 395,110       | 7.37%                           | 6.67%                    |
| Lee et al. (2018)             | 1,108,439     | 11.03%                          | 9.60%                    |
| Current                       | 3,014,057     | 15.91%                          | 12.14%                   |

---

**Supplementary Table 30. Stratified LD Score Regressions**

| Category                                     | Enrichment | Enrichment - S.E. | Enrichment - 95% CI - low |
|----------------------------------------------|------------|-------------------|---------------------------|
| <u><i>Cahoy et al, 2008 Annotations:</i></u> |            |                   |                           |
| Astrocytes                                   | 1.0940     | 0.0444            | 1.0069                    |
| Neurons                                      | 1.3063     | 0.0422            | 1.2237                    |
| Oligodendrocytes                             | 1.1032     | 0.0434            | 1.0181                    |
| <u><i>Baseline Annotations:</i></u>          |            |                   |                           |
| 3' UTR                                       | 1.8776     | 0.5795            | 0.7418                    |
| 5' UTR                                       | 2.8471     | 1.0398            | 0.8091                    |
| Astrocytes                                   | 1.0940     | 0.0444            | 1.0069                    |
| Coding                                       | 3.4541     | 0.5996            | 2.2788                    |
| Conserved (GERP NS)                          | 1.8992     | 0.0470            | 1.8070                    |
| Conserved (Lindblad-Toh)                     | 9.1179     | 0.8728            | 7.4073                    |
| CTCF                                         | -0.0631    | 0.5749            | -1.1899                   |
| DGF                                          | 1.1977     | 0.2442            | 0.7191                    |
| DHS                                          | 1.4425     | 0.2306            | 0.9906                    |
| Enhancer (Andersson)                         | 2.8793     | 1.3353            | 0.2620                    |
| Enhancer (Hoffman)                           | 1.8640     | 0.3274            | 1.2223                    |
| Fetal DHS                                    | 2.3895     | 0.3418            | 1.7196                    |
| H3K27ac                                      | 1.0824     | 0.0342            | 1.0153                    |
| H3K4me1                                      | 1.3980     | 0.0775            | 1.2462                    |
| H3K4me3                                      | 1.9303     | 0.1644            | 1.6082                    |
| H3K9ac                                       | 1.7968     | 0.1649            | 1.4736                    |
| HCK27ac                                      | 1.1898     | 0.0780            | 1.0368                    |
| Intron                                       | 1.2212     | 0.0288            | 1.1648                    |
| Neurons                                      | 1.3063     | 0.0422            | 1.2237                    |
| Oligodendrocytes                             | 1.1032     | 0.0434            | 1.0181                    |
| Promoter                                     | 1.3078     | 0.2778            | 0.7633                    |
| Promoter flanking                            | 1.8546     | 0.9737            | -0.0538                   |
| Repressed                                    | 0.8843     | 0.0800            | 0.7275                    |
| Super enhancer (Hnisz)                       | 1.1290     | 0.0452            | 1.0404                    |
| Super enhancer (Vehadi)                      | 1.6059     | 0.1963            | 1.2212                    |
| Transcribed                                  | 1.1467     | 0.0928            | 0.9648                    |
| Transcription factor binding site            | 1.2530     | 0.1888            | 0.8829                    |
| Transcription start site                     | 3.4956     | 0.7592            | 2.0076                    |
| Typical enhancer                             | 1.3250     | 0.2321            | 0.8701                    |
| Weak enhancer                                | 2.7174     | 0.6479            | 1.4475                    |

Notes: The table displays the results of running SLDSC on baseline annotations from [1] and gene set annotations from [2]. E SLDSC on the baseline annotations jointly with one annotation from [2] added at a time.

**References:**

- [1] Gazal, S. et al. Linkage disequilibrium dependent architecture of human complex traits reveals action of negative selection
- [2] Cahoy, J. D. et al. A Transcriptome Database for Astrocytes, Neurons, and Oligodendrocytes: A New Resource for Unde

*EA4 (this paper)*

| Enrichment - 95% CI - high | Prop of $h^2$ | Prop of $h^2$ - S.E. | Prop of $h^2$ - 95% CI - low |
|----------------------------|---------------|----------------------|------------------------------|
| 1.1811                     | 0.1874        | 0.0076               | 0.1725                       |
| 1.3889                     | 0.2097        | 0.0068               | 0.1965                       |
| 1.1884                     | 0.1605        | 0.0063               | 0.1481                       |
| 3.0135                     | 0.0210        | 0.0065               | 0.0083                       |
| 4.8851                     | 0.0156        | 0.0057               | 0.0044                       |
| 1.1811                     | 0.1874        | 0.0076               | 0.1725                       |
| 4.6294                     | 0.0493        | 0.0086               | 0.0325                       |
| 1.9913                     | 3.3146        | 0.0820               | 3.1538                       |
| 10.8286                    | 0.2342        | 0.0224               | 0.1903                       |
| 1.0638                     | -0.0015       | 0.0137               | -0.0284                      |
| 1.6762                     | 0.1629        | 0.0332               | 0.0978                       |
| 1.8945                     | 0.2398        | 0.0383               | 0.1646                       |
| 5.4965                     | 0.0125        | 0.0058               | 0.0011                       |
| 2.5057                     | 0.0783        | 0.0137               | 0.0513                       |
| 3.0594                     | 0.2006        | 0.0287               | 0.1443                       |
| 1.1495                     | 0.4211        | 0.0133               | 0.3950                       |
| 1.5499                     | 0.5923        | 0.0328               | 0.5280                       |
| 2.2525                     | 0.2568        | 0.0219               | 0.2139                       |
| 2.1201                     | 0.2253        | 0.0207               | 0.1848                       |
| 1.3427                     | 0.3198        | 0.0210               | 0.2787                       |
| 1.2775                     | 0.4732        | 0.0111               | 0.4513                       |
| 1.3889                     | 0.2097        | 0.0068               | 0.1965                       |
| 1.1884                     | 0.1605        | 0.0063               | 0.1481                       |
| 1.8522                     | 0.0401        | 0.0085               | 0.0234                       |
| 3.7630                     | 0.0154        | 0.0081               | -0.0004                      |
| 1.0411                     | 0.4075        | 0.0369               | 0.3353                       |
| 1.2176                     | 0.1888        | 0.0076               | 0.1740                       |
| 1.9906                     | 0.0333        | 0.0041               | 0.0253                       |
| 1.3287                     | 0.3967        | 0.0321               | 0.3338                       |
| 1.6231                     | 0.1644        | 0.0248               | 0.1159                       |
| 4.9837                     | 0.0623        | 0.0135               | 0.0358                       |
| 1.7799                     | 0.0290        | 0.0051               | 0.0190                       |
| 3.9873                     | 0.0570        | 0.0136               | 0.0304                       |

estimates of baseline annotations are from running SLDSC on all the baseline annotations jointly. Estimates of [2] ar

1. bioRxiv 82024 (2016) doi:10.1101/082024.

rstanding Brain Development and Function. J. Neurosci. 28, 264–278 (2008).

| Prop of $h^2$ - 95% CI - high | Enrichment | Enrichment - S.E. | Enrichment - 95% CI - low |
|-------------------------------|------------|-------------------|---------------------------|
| 0.2023                        | 1.0793     | 0.0429            | 0.9952                    |
| 0.2230                        | 1.3302     | 0.0461            | 1.2398                    |
| 0.1728                        | 1.0862     | 0.0460            | 0.9960                    |
| 0.0337                        | 1.4634     | 0.6979            | 0.0954                    |
| 0.0268                        | 2.0271     | 1.2742            | -0.4703                   |
| 0.2023                        | 1.0793     | 0.0429            | 0.9952                    |
| 0.0661                        | 2.8662     | 0.7521            | 1.3920                    |
| 3.4754                        | 1.9183     | 0.0526            | 1.8152                    |
| 0.2781                        | 9.2215     | 1.0454            | 7.1726                    |
| 0.0254                        | -0.9222    | 0.6553            | -2.2066                   |
| 0.2280                        | 1.0462     | 0.3011            | 0.4560                    |
| 0.3149                        | 1.2763     | 0.2756            | 0.7360                    |
| 0.0238                        | 0.7008     | 1.5458            | -2.3290                   |
| 0.1052                        | 1.9605     | 0.3690            | 1.2373                    |
| 0.2568                        | 2.4595     | 0.3983            | 1.6788                    |
| 0.4472                        | 1.1129     | 0.0410            | 1.0325                    |
| 0.6567                        | 1.3904     | 0.0899            | 1.2142                    |
| 0.2996                        | 1.9395     | 0.1864            | 1.5741                    |
| 0.2659                        | 1.7004     | 0.1848            | 1.3382                    |
| 0.3609                        | 1.1637     | 0.0924            | 0.9827                    |
| 0.4950                        | 1.2228     | 0.0333            | 1.1575                    |
| 0.2230                        | 1.3302     | 0.0461            | 1.2398                    |
| 0.1728                        | 1.0862     | 0.0460            | 0.9960                    |
| 0.0568                        | 1.1677     | 0.3307            | 0.5196                    |
| 0.0313                        | 1.8021     | 1.2345            | -0.6175                   |
| 0.4798                        | 0.8516     | 0.0961            | 0.6632                    |
| 0.2036                        | 1.1653     | 0.0557            | 1.0561                    |
| 0.0412                        | 1.5101     | 0.2159            | 1.0870                    |
| 0.4597                        | 1.1718     | 0.1105            | 0.9553                    |
| 0.2130                        | 0.9222     | 0.2403            | 0.4512                    |
| 0.0889                        | 3.2543     | 0.8395            | 1.6089                    |
| 0.0389                        | 1.5268     | 0.2785            | 0.9810                    |
| 0.0837                        | 2.2803     | 0.8260            | 0.6612                    |

motations are from running

*EA3 (Lee et al, 2018)*

| Enrichment - 95% CI - high | Prop of $h^2$ | Prop of $h^2$ - S.E. | Prop of $h^2$ - 95% CI - low |
|----------------------------|---------------|----------------------|------------------------------|
| 1.1634                     | 0.1849        | 0.0073               | 0.1706                       |
| 1.4206                     | 0.2136        | 0.0074               | 0.1991                       |
| 1.1764                     | 0.1580        | 0.0067               | 0.1449                       |
| 2.8313                     | 0.0164        | 0.0078               | 0.0011                       |
| 4.5244                     | 0.0111        | 0.0070               | -0.0026                      |
| 1.1634                     | 0.1849        | 0.0073               | 0.1706                       |
| 4.3404                     | 0.0409        | 0.0107               | 0.0199                       |
| 2.0215                     | 3.3481        | 0.0919               | 3.1680                       |
| 11.2704                    | 0.2369        | 0.0269               | 0.1842                       |
| 0.3622                     | -0.0220       | 0.0156               | -0.0527                      |
| 1.6365                     | 0.1423        | 0.0410               | 0.0620                       |
| 1.8165                     | 0.2121        | 0.0458               | 0.1223                       |
| 3.7307                     | 0.0030        | 0.0067               | -0.0101                      |
| 2.6837                     | 0.0823        | 0.0155               | 0.0520                       |
| 3.2402                     | 0.2064        | 0.0334               | 0.1409                       |
| 1.1933                     | 0.4330        | 0.0160               | 0.4017                       |
| 1.5667                     | 0.5891        | 0.0381               | 0.5144                       |
| 2.3049                     | 0.2580        | 0.0248               | 0.2094                       |
| 2.0627                     | 0.2133        | 0.0232               | 0.1678                       |
| 1.3447                     | 0.3128        | 0.0248               | 0.2641                       |
| 1.2881                     | 0.4738        | 0.0129               | 0.4485                       |
| 1.4206                     | 0.2136        | 0.0074               | 0.1991                       |
| 1.1764                     | 0.1580        | 0.0067               | 0.1449                       |
| 1.8158                     | 0.0358        | 0.0101               | 0.0159                       |
| 4.2216                     | 0.0150        | 0.0103               | -0.0051                      |
| 1.0401                     | 0.3925        | 0.0443               | 0.3057                       |
| 1.2745                     | 0.1949        | 0.0093               | 0.1766                       |
| 1.9332                     | 0.0313        | 0.0045               | 0.0225                       |
| 1.3883                     | 0.4054        | 0.0382               | 0.3305                       |
| 1.3932                     | 0.1210        | 0.0315               | 0.0592                       |
| 4.8996                     | 0.0580        | 0.0150               | 0.0287                       |
| 2.0726                     | 0.0334        | 0.0061               | 0.0215                       |
| 3.8993                     | 0.0479        | 0.0173               | 0.0139                       |

| Prop of $h^2$ - 95% CI - high |
|-------------------------------|
| 0.1992                        |
| 0.2281                        |
| 0.1711                        |
| 0.0317                        |
| 0.0248                        |
| 0.1992                        |
| 0.0620                        |
| 3.5281                        |
| 0.2895                        |
| 0.0086                        |
| 0.2226                        |
| 0.3019                        |
| 0.0161                        |
| 0.1127                        |
| 0.2719                        |
| 0.4643                        |
| 0.6638                        |
| 0.3066                        |
| 0.2587                        |
| 0.3614                        |
| 0.4991                        |
| 0.2281                        |
| 0.1711                        |
| 0.0557                        |
| 0.0351                        |
| 0.4793                        |
| 0.2131                        |
| 0.0401                        |
| 0.4803                        |
| 0.1828                        |
| 0.0874                        |
| 0.0453                        |
| 0.0818                        |
